# Supplementary material for: Proteomics of Primary Uveal Melanoma: Insights into Metastasis and Protein Biomarkers
Source: Cancers (Basel). 2021 Jul 14;13(14):3520. doi: 10.3390/cancers13143520 (PMC8307952; doi:10.3390/cancers13143520)
Supplement: Supplementary file 1 [file cancers-13-03520-s001.zip]

Archive with 16 entries (16 files):
- Figure S1-Protein Distributions.pdf
- Figure S2-SDS-PAGE for Western blots.pdf
- Figure S3.  Western Blots (n=12).pdf
- Table S1. Specimen Properties.xlsx
- Table S2. Choroid Control Individual LC MSMS iTRAQ Data.xlsx
- Table S3. pUM Individual LC MSMS iTRAQ Data.xlsx
- Table S4. Average Relative Protein Abundance, Metastasizing pUM.xlsx
- Table S5. Average Relative Protein Abundance, Non-Metastasizing pUM.xlsx
- Table S6. Differentially Expressed Proteins.xlsx
- Table S7. Pathways - DE Proteins Elevated in Metastasizing pUM.xlsx
- Table S8. Pathways - DE Proteins Elevated in Non-Metastasizing pUM.xlsx
- Table S9. Immune Proteins.xlsx
- Table S10. DE Immune Proteins.xlsx
- Table S11. Pathways - DE Immune Proteins Elevated in Metastasizing pUM.xlsx
- Table S12. Pathways - DE Immune Proteins Elevated in Non-Metastasizing pUM.xlsx
- Table S13. Comparsion of DE proteins with TCGA datasets.xlsx
