# Supplementary material for: Proteomics of Primary Uveal Melanoma: Insights into Metastasis and Protein Biomarkers
Source: Cancers (Basel). 2021 Jul 14;13(14):3520. doi: 10.3390/cancers13143520 (PMC8307952; doi:10.3390/cancers13143520)
Supplement: Supplementary file 1 [file cancers-13-03520-s001.zip › Figure S2-SDS-PAGE for Western blots.pdf]

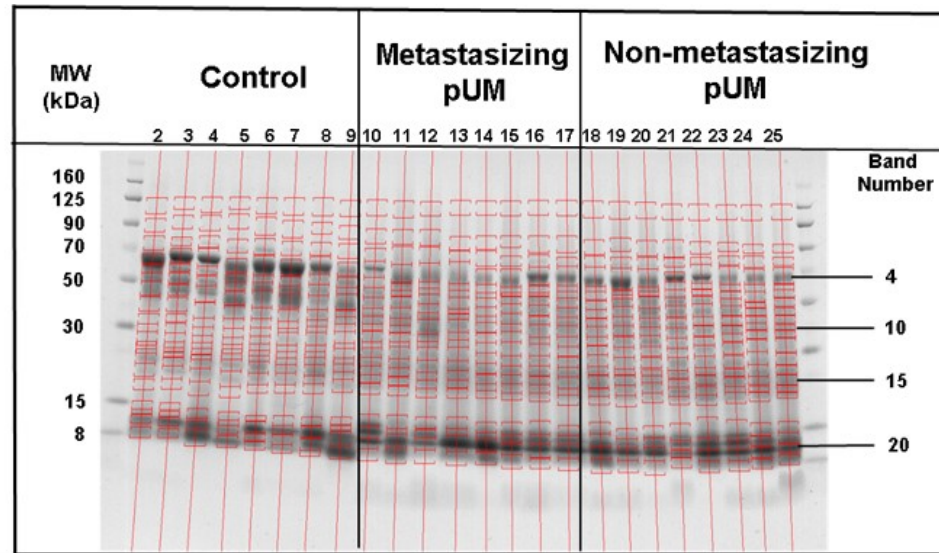

| Band Number     | Sample | Control Density   |      |      |      |               |      |      |      | Metastasizing pUM Density |      |      |      |      |      |      |      | Non-metastasizing pUM Density |      |      |      |      |      |      |      |
|-----------------|--------|-------------------|------|------|------|---------------|------|------|------|---------------------------|------|------|------|------|------|------|------|-------------------------------|------|------|------|------|------|------|------|
|                 |        | Non-metastasizing |      |      |      | Metastasizing |      |      |      |                           |      |      |      |      |      |      |      |                               |      |      |      |      |      |      |      |
|                 |        | C1                | C2   | C3   | C4   | C8            | C9   | C11  | C13  | UM91                      | UM93 | UM94 | UM56 | UM62 | UM67 | UM85 | UM86 | UM34                          | UM35 | UM39 | UM6  | UM9  | UM13 | UM17 | UM19 |
|                 | Lane   | 2                 | 3    | 4    | 5    | 6             | 7    | 8    | 9    | 10                        | 11   | 12   | 13   | 14   | 15   | 16   | 17   | 18                            | 19   | 20   | 21   | 22   | 23   | 24   | 25   |
| 1               |        | 0.01              | 0.01 | 0.01 | 0.01 | 0.01          | 0.01 | 0.01 | 0.00 | 0.01                      | 0.01 | 0.01 | 0.01 | 0.00 | 0.01 | 0.01 | 0.00 | 0.01                          | 0.01 | 0.01 | 0.01 | 0.00 | 0.01 | 0.01 | 0.01 |
| 2               |        | 0.01              | 0.01 | 0.01 | 0.01 | 0.01          | 0.01 | 0.01 | 0.01 | 0.02                      | 0.02 | 0.03 | 0.02 | 0.01 | 0.02 | 0.02 | 0.02 | 0.02                          | 0.03 | 0.03 | 0.03 | 0.01 | 0.02 | 0.02 | 0.01 |
| 3               |        | 0.03              | 0.03 | 0.02 | 0.02 | 0.05          | 0.02 | 0.02 | 0.01 | 0.03                      | 0.04 | 0.04 | 0.03 | 0.02 | 0.03 | 0.03 | 0.03 | 0.02                          | 0.05 | 0.04 | 0.04 | 0.02 | 0.03 | 0.03 | 0.02 |
| 4               |        | 0.41              | 0.33 | 0.19 | 0.24 | 0.29          | 0.38 | 0.20 | 0.10 | 0.11                      | 0.15 | 0.12 | 0.08 | 0.07 | 0.12 | 0.18 | 0.12 | 0.12                          | 0.20 | 0.13 | 0.22 | 0.11 | 0.08 | 0.10 | 0.10 |
| 5               |        | 0.27              | 0.16 | 0.08 | 0.29 | 0.16          | 0.19 | 0.11 | 0.13 | 0.07                      | 0.15 | 0.10 | 0.09 | 0.05 | 0.09 | 0.08 | 0.08 | 0.07                          | 0.13 | 0.13 | 0.07 | 0.05 | 0.07 | 0.05 | 0.05 |
| 6               |        | 0.19              | 0.18 | 0.11 | 0.22 | 0.22          | 0.26 | 0.12 | 0.12 | 0.11                      | 0.12 | 0.11 | 0.09 | 0.05 | 0.08 | 0.09 | 0.09 | 0.06                          | 0.11 | 0.10 | 0.08 | 0.05 | 0.07 | 0.06 | 0.06 |
| 7               |        | 0.17              | 0.18 | 0.11 | 0.23 | 0.18          | 0.27 | 0.11 | 0.18 | 0.12                      | 0.13 | 0.12 | 0.10 | 0.06 | 0.09 | 0.11 | 0.11 | 0.08                          | 0.13 | 0.13 | 0.13 | 0.09 | 0.09 | 0.07 | 0.08 |
| 8               |        | 0.07              | 0.07 | 0.05 | 0.12 | 0.09          | 0.08 | 0.10 | 0.13 | 0.11                      | 0.13 | 0.13 | 0.12 | 0.07 | 0.10 | 0.12 | 0.12 | 0.08                          | 0.12 | 0.15 | 0.12 | 0.10 | 0.11 | 0.09 | 0.09 |
| 9               |        | 0.03              | 0.04 | 0.04 | 0.04 | 0.06          | 0.04 | 0.08 | 0.10 | 0.12                      | 0.15 | 0.16 | 0.12 | 0.08 | 0.11 | 0.11 | 0.13 | 0.10                          | 0.12 | 0.13 | 0.11 | 0.08 | 0.10 | 0.09 | 0.10 |
| 10              |        | 0.04              | 0.04 | 0.04 | 0.03 | 0.04          | 0.04 | 0.07 | 0.06 | 0.09                      | 0.13 | 0.19 | 0.13 | 0.08 | 0.11 | 0.12 | 0.12 | 0.10                          | 0.13 | 0.12 | 0.10 | 0.10 | 0.12 | 0.11 | 0.12 |
| 11              |        | 0.04              | 0.04 | 0.04 | 0.04 | 0.05          | 0.05 | 0.08 | 0.04 | 0.09                      | 0.10 | 0.15 | 0.11 | 0.06 | 0.09 | 0.10 | 0.10 | 0.09                          | 0.10 | 0.12 | 0.08 | 0.08 | 0.09 | 0.09 | 0.11 |
| 12              |        | 0.05              | 0.05 | 0.05 | 0.04 | 0.06          | 0.05 | 0.08 | 0.05 | 0.08                      | 0.09 | 0.11 | 0.10 | 0.06 | 0.09 | 0.09 | 0.08 | 0.08                          | 0.09 | 0.08 | 0.08 | 0.09 | 0.09 | 0.08 | 0.08 |
| 13              |        | 0.06              | 0.07 | 0.08 | 0.05 | 0.07          | 0.06 | 0.09 | 0.06 | 0.11                      | 0.11 | 0.11 | 0.11 | 0.08 | 0.11 | 0.10 | 0.11 | 0.09                          | 0.09 | 0.08 | 0.10 | 0.10 | 0.11 | 0.09 | 0.09 |
| 14              |        | 0.07              | 0.08 | 0.09 | 0.07 | 0.10          | 0.08 | 0.12 | 0.09 | 0.13                      | 0.14 | 0.14 | 0.17 | 0.12 | 0.15 | 0.14 | 0.14 | 0.13                          | 0.12 | 0.11 | 0.13 | 0.14 | 0.15 | 0.13 | 0.14 |
| 15              |        | 0.10              | 0.08 | 0.11 | 0.09 | 0.13          | 0.09 | 0.15 | 0.11 | 0.14                      | 0.15 | 0.14 | 0.18 | 0.14 | 0.16 | 0.16 | 0.15 | 0.16                          | 0.13 | 0.13 | 0.13 | 0.18 | 0.17 | 0.16 | 0.16 |
| 16              |        | 0.06              | 0.06 | 0.08 | 0.05 | 0.08          | 0.08 | 0.11 | 0.10 | 0.12                      | 0.12 | 0.12 | 0.16 | 0.12 | 0.13 | 0.13 | 0.12 | 0.14                          | 0.12 | 0.12 | 0.14 | 0.17 | 0.14 | 0.14 | 0.17 |
| 17              |        | 0.03              | 0.03 | 0.06 | 0.03 | 0.03          | 0.03 | 0.06 | 0.08 | 0.08                      | 0.07 | 0.07 | 0.10 | 0.09 | 0.09 | 0.09 | 0.08 | 0.08                          | 0.06 | 0.08 | 0.09 | 0.12 | 0.11 | 0.10 | 0.13 |
| 18              |        | 0.06              | 0.04 | 0.17 | 0.07 | 0.09          | 0.07 | 0.13 | 0.08 | 0.19                      | 0.12 | 0.11 | 0.13 | 0.14 | 0.16 | 0.13 | 0.15 | 0.12                          | 0.10 | 0.10 | 0.12 | 0.15 | 0.17 | 0.15 | 0.15 |
| 19              |        | 0.10              | 0.09 | 0.26 | 0.12 | 0.30          | 0.25 | 0.38 | 0.15 | 0.34                      | 0.18 | 0.25 | 0.24 | 0.28 | 0.33 | 0.30 | 0.29 | 0.27                          | 0.23 | 0.26 | 0.24 | 0.39 | 0.37 | 0.32 | 0.27 |
| 20              |        | 0.20              | 0.28 | 0.37 | 0.20 | 0.22          | 0.18 | 0.31 | 0.34 | 0.30                      | 0.33 | 0.24 | 0.43 | 0.50 | 0.40 | 0.32 | 0.33 | 0.42                          | 0.31 | 0.31 | 0.24 | 0.40 | 0.34 | 0.39 | 0.39 |
| 21              |        | 0.15              | 0.17 | 0.29 | 0.21 | 0.13          | 0.12 | 0.09 | 0.38 | 0.09                      | 0.21 | 0.05 | 0.13 | 0.25 | 0.13 | 0.08 | 0.07 | 0.16                          | 0.09 | 0.06 | 0.09 | 0.15 | 0.10 | 0.17 | 0.21 |
| Total Density   |        | 2.13              | 2.01 | 2.26 | 2.17 | 2.37          | 2.34 | 2.39 | 2.33 | 2.46                      | 2.65 | 2.51 | 2.64 | 2.35 | 2.60 | 2.49 | 2.43 | 2.41                          | 2.45 | 2.42 | 2.32 | 2.59 | 2.53 | 2.44 | 2.54 |
| Average Density |        |                   |      |      |      | 2.25          |      |      |      |                           |      |      |      | 2.52 |      |      |      |                               |      |      | 2.47 |      |      |      |      |
| SD              |        |                   |      |      |      | 0.13          |      |      |      |                           |      |      |      | 0.11 |      |      |      |                               |      |      | 0.09 |      |      |      |      |
| RSD (%)         |        |                   |      |      |      | 5.9           |      |      |      |                           |      |      |      | 4.5  |      |      |      |                               |      |      | 3.6  |      |      |      |      |

**Supplementary Figure S2. SDS-PAGE for Western Blot Analysis.** Each lane in the above Coomassie blue stained SDS-PAGE contains the same tissue samples and protein amounts (~10 µg/lane) used for Western Blot Analysis to corroborate protein quantitation. The displayed densitometric data from Coomassie blue staining intensities supports equal sample loading per lane. Coomassie blue staining also demonstrates different SDS-PAGE profiles for pUM and control samples.
