# Supplementary material for: Proteomics of Primary Uveal Melanoma: Insights into Metastasis and Protein Biomarkers
Source: Cancers (Basel). 2021 Jul 14;13(14):3520. doi: 10.3390/cancers13143520 (PMC8307952; doi:10.3390/cancers13143520)
Supplement: Supplementary file 1 [file cancers-13-03520-s001.zip › Figure S3. Western Blots (n=12).pdf]

# ***Supplementary Figure S3***

- ***Western blot results for 12 proteins.*** Each of the following Western blots in Figures S3,A-N include choroid control samples C01, C02, C03, C04, C08, C09, C11, C13, metastasizing pUM samples UM91, UM93, UM94, UM56, UM62, UM67, UM85, UM86, and non-metastasizing pUM samples UM33, UM34, UM39, UM06, UM09, UM13, UM17, UM19. Blue control sample labels denote choroid tissue from eyes containing metastasizing pUM; green labels denote choroid from non-metastasizing pUM. Red pUM sample labels denote specimens from Cleveland, OH; black labels denote samples from Liverpool, UK. Prior to blotting to PVDF membrane, sample amounts applied to SDS-PAGE (~10 µg) were equalized based on Coomassie blue staining intensities (see Supplementary Figure S2). The Chameleon Duo pre-stained protein ladder from LI-COR, USA was used to estimate molecular weight. Fluorescence intensity was measured with a LI-COR Odyssey CLx imaging system on the indicated bands using Image Studio 5.2. Intensity measurements and calculations are presented without adjustments for background or outlier values.

**Figure S3A. Fluorescence immunoblot reactivity for glutathione S-transferase Omega-1, UniProt accession number P78471, molecular weight 27,566 Da.** The blot was probed overnight at 4°C with anti-glutathione S-transferase Omega 1 (mouse mAb) at 0.5 µg/mL, #MABN642, EMD Millipore). Secondary antibody was donkey anti-mouse from LI-COR, USA (#925-68072) used at a dilution of 1:5000, 2-3 h, room temperature in the dark.

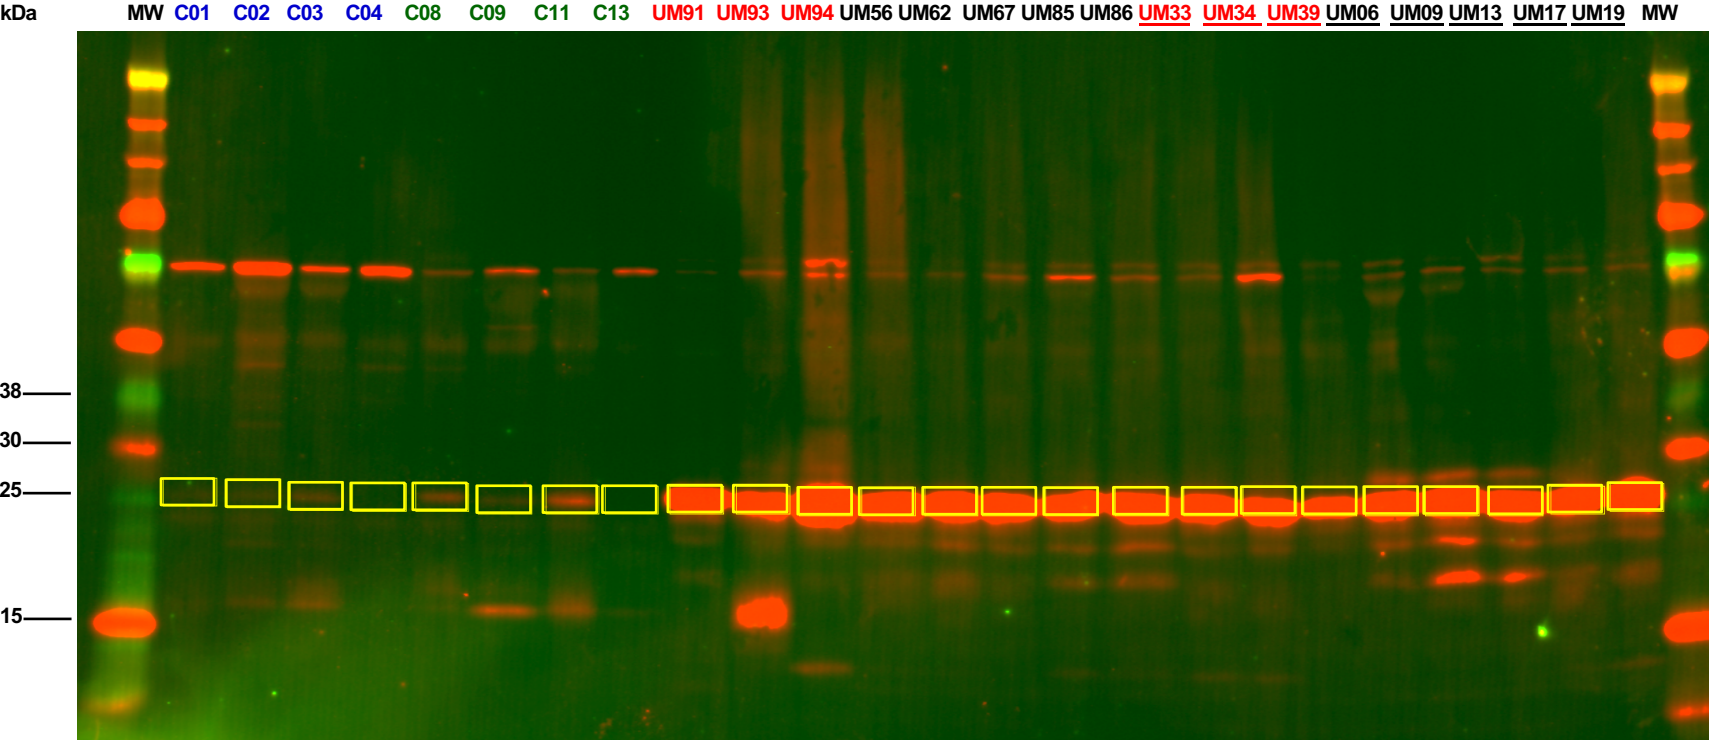

|                                       |  |            |      |      |      |      |      |      |      |       |             |       |       |       |       |       |       |       |             |      |       |       |       |       |       |  |  |  |
|---------------------------------------|--|------------|------|------|------|------|------|------|------|-------|-------------|-------|-------|-------|-------|-------|-------|-------|-------------|------|-------|-------|-------|-------|-------|--|--|--|
| Figure S3A. Quantitation              |  |            |      |      |      |      |      |      |      |       |             |       |       |       |       |       |       |       |             |      |       |       |       |       |       |  |  |  |
| Glutathione S-transferase Omega-1     |  | C01        | C02  | C03  | C04  | C08  | C09  | C11  | C13  | UM91  | UM93        | UM94  | UM56  | UM62  | UM67  | UM85  | UM86  | UM33  | UM34        | UM39 | UM06  | UM09  | UM13  | UM17  | UM19  |  |  |  |
| Fluorescence intensity                |  | 1318       | 1357 | 1393 | 1224 | 1421 | 1287 | 1764 | 1133 | 20034 | 8406        | 30562 | 14072 | 14866 | 16734 | 17964 | 25003 | 15606 | 13011       | 8252 | 31118 | 32130 | 27001 | 17171 | 19923 |  |  |  |
| Average intensity ± RSD               |  | 1362 ± 14% |      |      |      |      |      |      |      |       | 18455 ± 37% |       |       |       |       |       |       |       | 20526 ± 42% |      |       |       |       |       |       |  |  |  |
| Average pUM intensity / Control ± RSD |  |            |      |      |      |      |      |      |      |       | 13.6 ± 37%  |       |       |       |       |       |       |       | 15.1 ± 42%  |      |       |       |       |       |       |  |  |  |
| Ave pUM Met / Ave pUM NoMet           |  |            |      |      |      |      |      |      |      |       | 0.9         |       |       |       |       |       |       |       | iTRAQ=1.1   |      |       |       |       |       |       |  |  |  |

**Figure S3B. Fluorescence immunoblot reactivity for macrophage migration inhibitory factor, UniProt accession number P14174, molecular weight 12,476 Da.** The blot was probed overnight at 4°C with anti-macrophage migration inhibitory factor (mouse mAb at 1.6 µg/mL, #MAB289-100, R&D Systems). Secondary antibody was donkey anti-mouse from LI-COR, USA (#925-68072) used at a dilution of 1:5000, 2-3 h, room temperature in the dark.

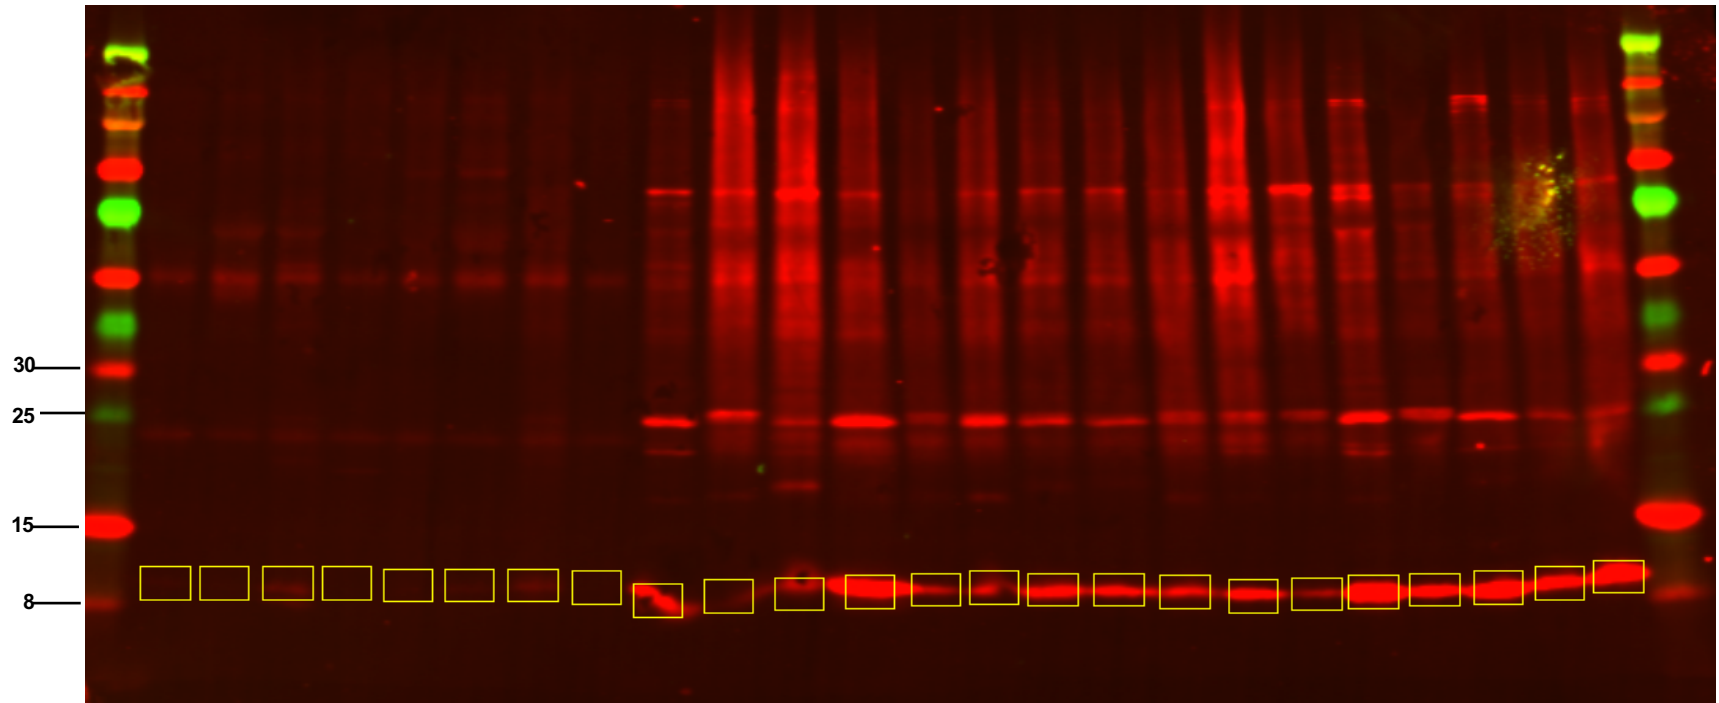

| Figure S3B. Quantitation               |          |     |     |     |     |     |     |     |            |      |      |      |           |      |      |      |            |      |      |      |           |      |      |      |           |  |  |  |
|----------------------------------------|----------|-----|-----|-----|-----|-----|-----|-----|------------|------|------|------|-----------|------|------|------|------------|------|------|------|-----------|------|------|------|-----------|--|--|--|
| Macrophage migration inhibitory factor | C01      | C02 | C03 | C04 | C08 | C09 | C11 | C13 | UM91       | UM93 | UM94 | UM56 | UM62      | UM67 | UM85 | UM86 | UM33       | UM34 | UM39 | UM06 | UM09      | UM13 | UM17 | UM19 |           |  |  |  |
| Fluorescence intensity                 | 490      | 487 | 563 | 478 | 491 | 504 | 571 | 473 | 1116       | 543  | 731  | 2206 | 720       | 755  | 1049 | 911  | 851        | 1061 | 619  | 4202 | 1310      | 2697 | 1359 | 1996 |           |  |  |  |
| Average intensity ± RSD                | 507 ± 8% |     |     |     |     |     |     |     | 1004 ± 52% |      |      |      |           |      |      |      | 1762 ± 67% |      |      |      |           |      |      |      |           |  |  |  |
| Average pUM intensity / Control ± RSD  |          |     |     |     |     |     |     |     | 2.0 ± 52%  |      |      |      | iTRAQ=1.8 |      |      |      |            |      |      |      | 3.5 ± 67% |      |      |      | iTRAQ=2.1 |  |  |  |
| Ave pUM Met / Ave pUM NoMet            |          |     |     |     |     |     |     |     |            |      |      |      | 0.6       |      |      |      | iTRAQ=0.8  |      |      |      |           |      |      |      |           |  |  |  |

**Figure S3C. Fluorescence immunoblot reactivity for Syntenin-1, UniProt accession number O00560, molecular weight 32,424 Da.** The blot was probed overnight at 4°C with anti-syntenin-1 (rabbit pAb at 1:1000 dilution, #A5360, AB clonal). Secondary antibody was goat anti-rabbit IgG from LI-COR, USA (#925-6807) used at a dilution of 1:5000, 2-3 h, room temperature in the dark.

kDa      MW    C01   C02   C03   C04   C08   C09   C11   C13   UM91   UM93   UM94   UM56   UM62   UM67   UM85   UM86   UM33   UM34   UM39   UM06   UM09   UM13   UM17   UM19   MW

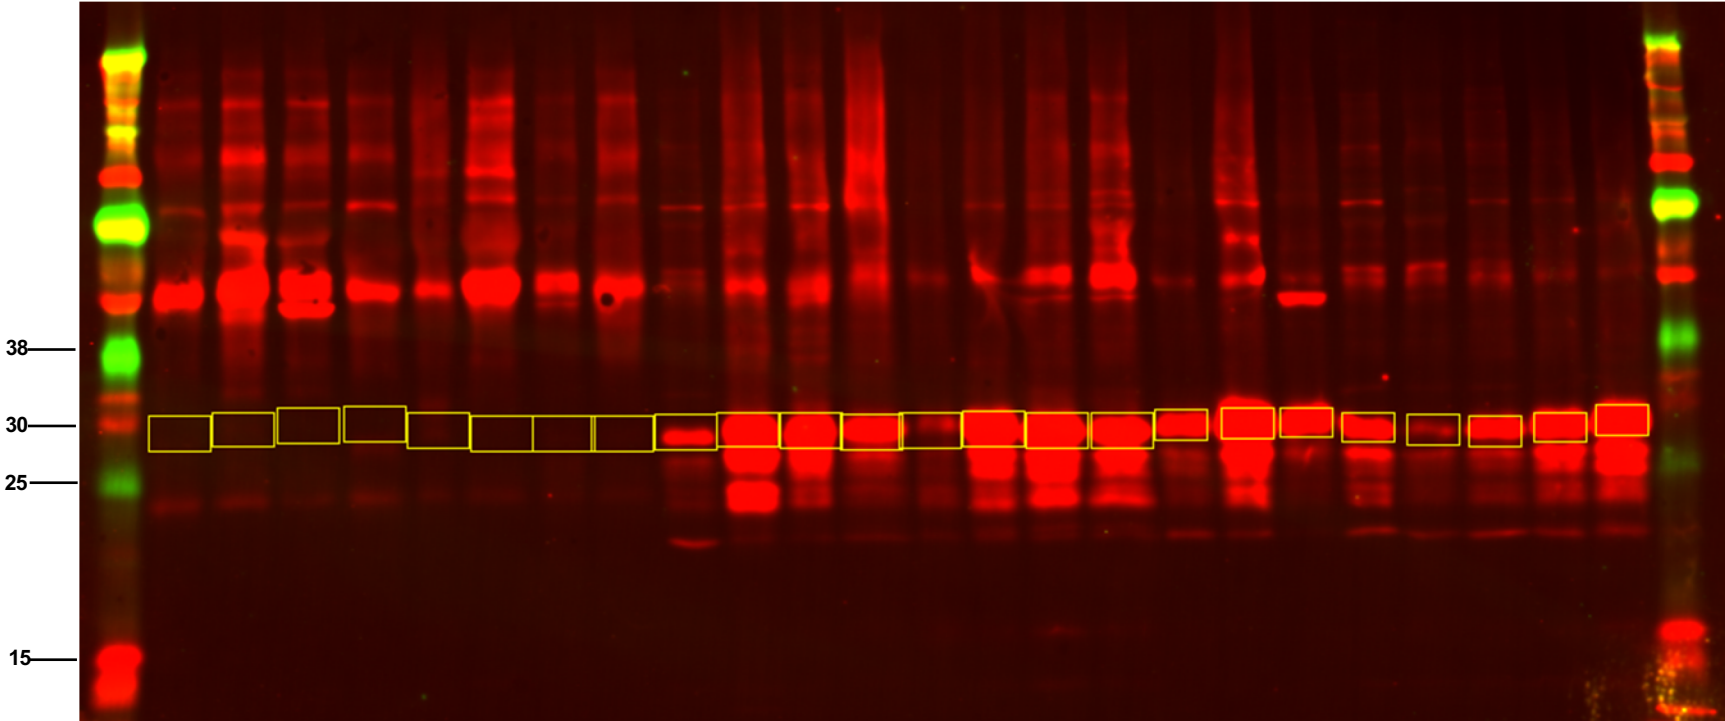

|                                       |           |      |      |      |      |      |      |      |             |       |       |       |      |       |       |       |              |        |       |       |      |       |       |       |
|---------------------------------------|-----------|------|------|------|------|------|------|------|-------------|-------|-------|-------|------|-------|-------|-------|--------------|--------|-------|-------|------|-------|-------|-------|
| Figure S3C. Quantitation              |           |      |      |      |      |      |      |      |             |       |       |       |      |       |       |       |              |        |       |       |      |       |       |       |
| Syntenin-1                            | C01       | C02  | C03  | C04  | C08  | C09  | C11  | C13  | UM91        | UM93  | UM94  | UM56  | UM62 | UM67  | UM85  | UM86  | UM33         | UM34   | UM39  | UM06  | UM09 | UM13  | UM17  | UM19  |
| Fluorescence intensity                | 2290      | 2453 | 2203 | 2246 | 2432 | 2267 | 2290 | 2335 | 6568        | 31723 | 32993 | 15595 | 4992 | 38751 | 57420 | 32464 | 10139        | 111403 | 16330 | 11923 | 3241 | 10293 | 18736 | 42560 |
| Average intensity ± RSD               | 2315 ± 4% |      |      |      |      |      |      |      | 25763 ± 64% |       |       |       |      |       |       |       | 29078 ± 127% |        |       |       |      |       |       |       |
| Average pUM intensity / Control ± RSD |           |      |      |      |      |      |      |      | 11.9 ± 64%  |       |       |       |      |       |       |       | 12.1 ± 127%  |        |       |       |      |       |       |       |
| Ave pUM Met / Ave pUM NoMet           |           |      |      |      |      |      |      |      | 1.0         |       |       |       |      |       |       |       | iTRAQ=1.3    |        |       |       |      |       |       |       |

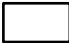

**Figure S3D. Fluorescence immunoblot reactivity for G-protein coupled receptor 143, UniProt accession number P51810, molecular weight 43,878 Da.** The blot was probed overnight at 4°C with anti-G-protein coupled receptor 143 (rabbit pAb at 1:2000, #A10568, ABclonal). Secondary antibody was goat anti-rabbit IgG from LI-COR, USA (#925-6807) used at a dilution of 1:5000, 2-3 h, room temperature in the dark.

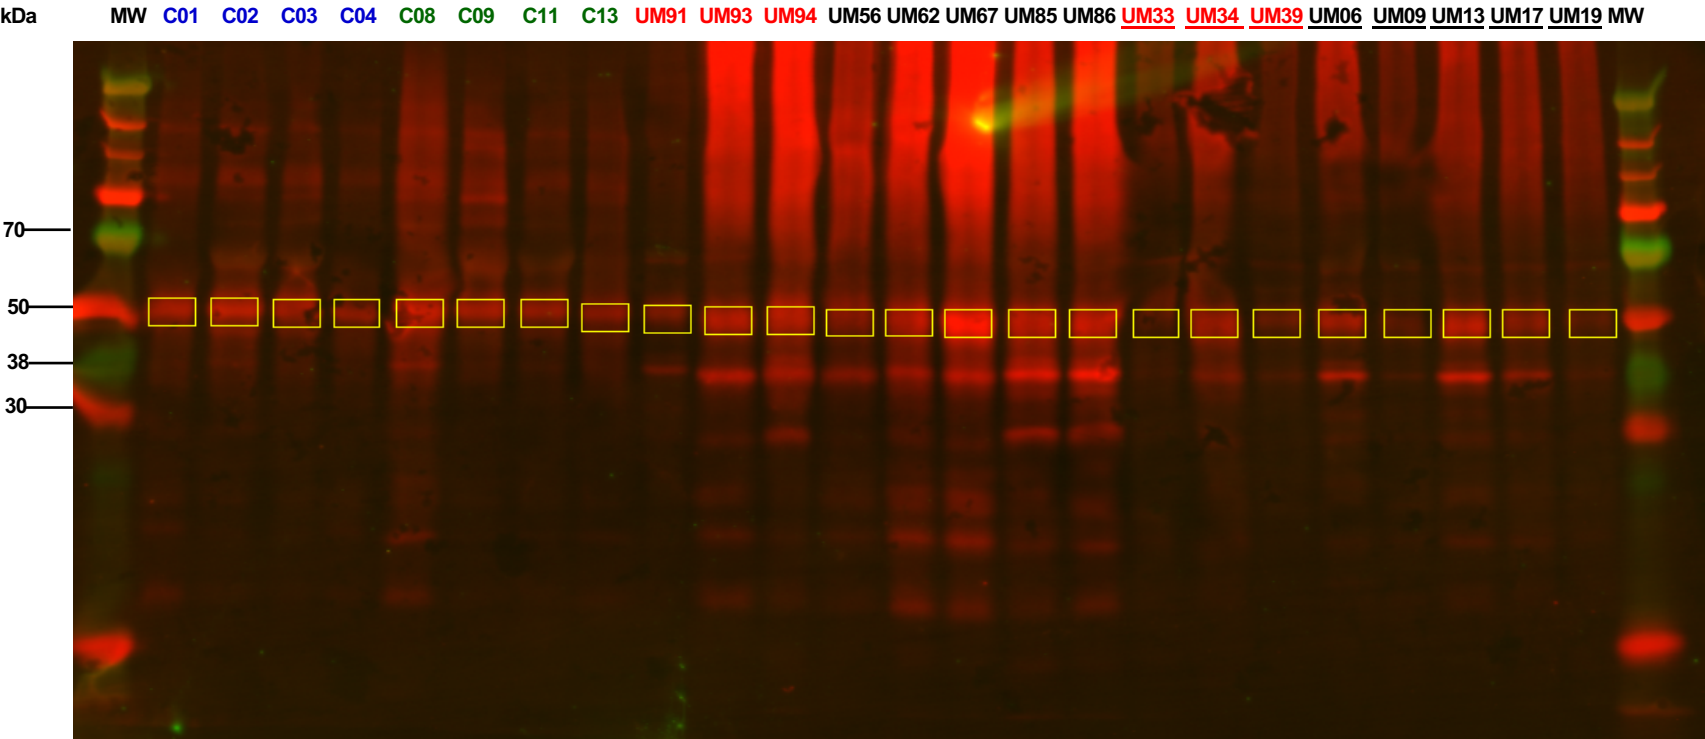

|                                       |  |            |      |      |      |      |      |      |      |             |      |      |      |      |       |       |       |            |      |      |      |      |      |      |      |  |  |
|---------------------------------------|--|------------|------|------|------|------|------|------|------|-------------|------|------|------|------|-------|-------|-------|------------|------|------|------|------|------|------|------|--|--|
| Figure S3D. Quantitation              |  |            |      |      |      |      |      |      |      |             |      |      |      |      |       |       |       |            |      |      |      |      |      |      |      |  |  |
| G-Potein coupled receptor 143         |  | C01        | C02  | C03  | C04  | C08  | C09  | C11  | C13  | UM91        | UM93 | UM94 | UM56 | UM62 | UM67  | UM85  | UM86  | UM33       | UM34 | UM39 | UM06 | UM09 | UM13 | UM17 | UM19 |  |  |
| Fluorescence intensity                |  | 6741       | 8950 | 5907 | 4513 | 9782 | 6903 | 5525 | 4706 | 3642        | 8870 | 9409 | 4957 | 9010 | 26354 | 10412 | 11149 | 2648       | 7116 | 3339 | 6111 | 2904 | 8924 | 5113 | 3031 |  |  |
| Average intensity ± RSD               |  | 6628 ± 29% |      |      |      |      |      |      |      | 10475 ± 66% |      |      |      |      |       |       |       | 4898 ± 47% |      |      |      |      |      |      |      |  |  |
| Average pUM intensity / Control ± RSD |  |            |      |      |      |      |      |      |      | 1.6 ± 66%   |      |      |      |      |       |       |       | 0.7 ± 47%  |      |      |      |      |      |      |      |  |  |
| Ave pUM Met / Ave pUM NoMet           |  |            |      |      |      |      |      |      |      | 2.1         |      |      |      |      |       |       |       | iTRAQ=1.5  |      |      |      |      |      |      |      |  |  |
|                                       |  |            |      |      |      |      |      |      |      | iTRAQ=1.9   |      |      |      |      |       |       |       |            |      |      |      |      |      |      |      |  |  |

**Figure S3E. Fluorescence immunoblot reactivity for HLA class II histocompatibility antigen DR alpha, UniProt accession number P01903, molecular weight 28,607 Da.** The blot was probed overnight at 4°C with anti-HLA class II histocompatibility antigen, DR alpha (rabbit pAb at 1:2000, #A11787, ABclonal). Secondary antibody was goat anti-rabbit IgG from LI-COR, USA (#925-6807) used at a dilution of 1:5000, 2-3 h, room temperature in the dark.

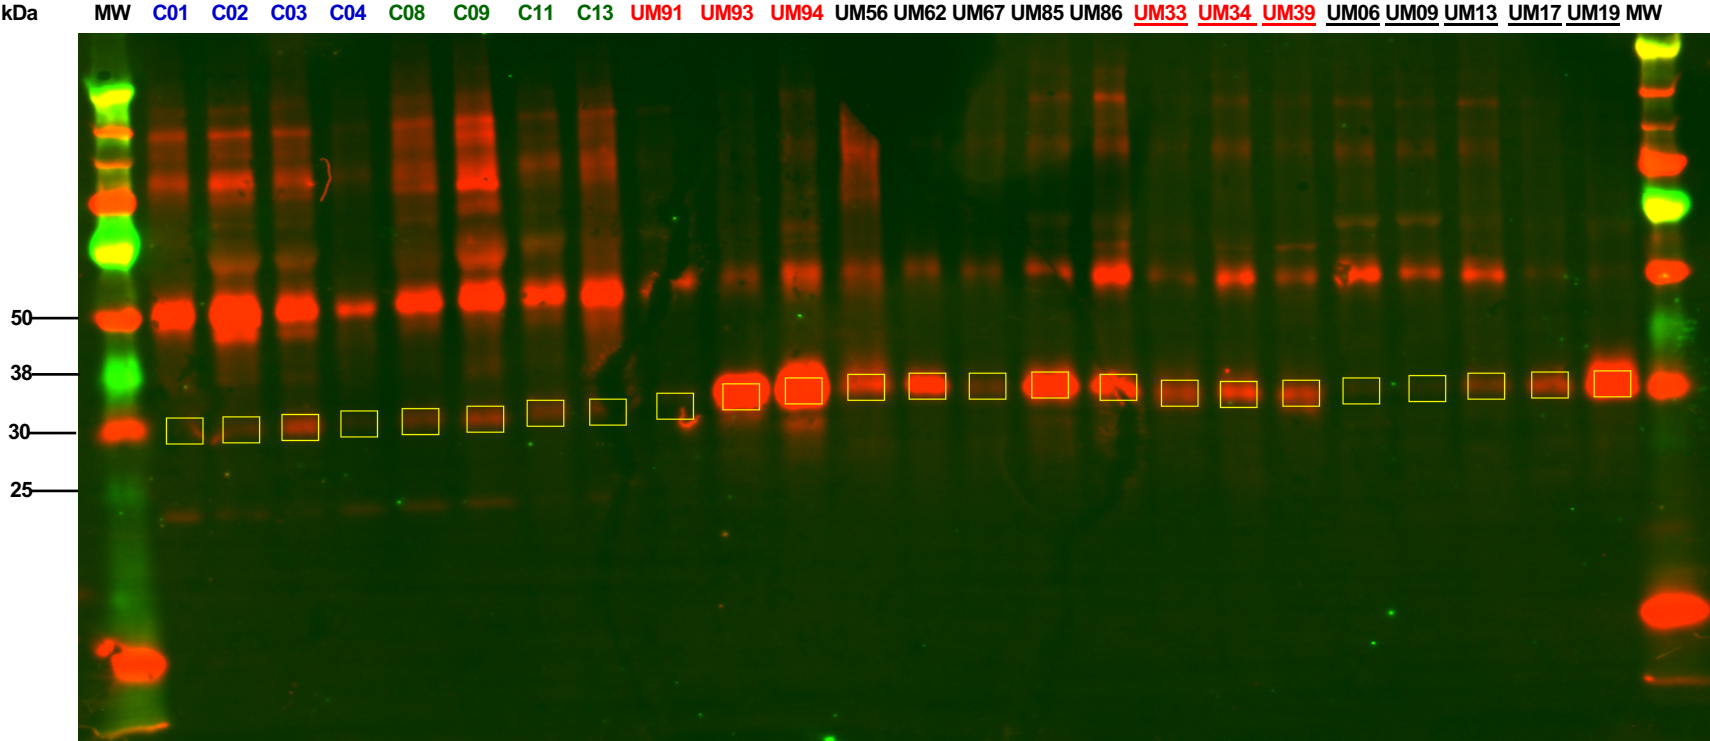

|                                               |  |            |      |      |      |      |      |      |      |             |       |       |      |      |      |      |      |            |      |      |      |      |      |      |      |  |  |
|-----------------------------------------------|--|------------|------|------|------|------|------|------|------|-------------|-------|-------|------|------|------|------|------|------------|------|------|------|------|------|------|------|--|--|
| Figure S3E. Quantitation                      |  |            |      |      |      |      |      |      |      |             |       |       |      |      |      |      |      |            |      |      |      |      |      |      |      |  |  |
| HLA Class II histocompatibility antigen DR al |  | C01        | C02  | C03  | C04  | C08  | C09  | C11  | C13  | UM91        | UM93  | UM94  | UM56 | UM62 | UM67 | UM85 | UM86 | UM33       | UM34 | UM39 | UM06 | UM09 | UM13 | UM17 | UM19 |  |  |
| Fluorescence intensity                        |  | 1346       | 1487 | 2077 | 1181 | 1545 | 1909 | 1682 | 1204 | 1284        | 10184 | 20579 | 2742 | 3725 | 1633 | 5778 | 3445 | 2317       | 2607 | 2380 | 1252 | 1200 | 1708 | 2219 | 6822 |  |  |
| Average intensity ± RSD                       |  | 1554 ± 21% |      |      |      |      |      |      |      | 6171 ± 105% |       |       |      |      |      |      |      | 2563 ± 70% |      |      |      |      |      |      |      |  |  |
| Average pUM intensity / Control ± RSD         |  |            |      |      |      |      |      |      |      | 4.09 ± 105% |       |       |      |      |      |      |      | 1.6 ± 58%  |      |      |      |      |      |      |      |  |  |
| Ave pUM Met / Ave pUM NoMet                   |  |            |      |      |      |      |      |      |      | 2.4         |       |       |      |      |      |      |      | iTRAQ=1.7  |      |      |      |      |      |      |      |  |  |



**Figure S3G. Fluorescence immunoblot reactivity for vitronectin, UniProt accession number P04004, molecular weight 54,306 Da.** The blot was probed overnight at 4°C with anti-vitronectin (mouse mAb at 0.4 µg/mL, #MAB2349, R&D Systems). Secondary antibody was donkey anti-mouse from LI-COR, USA (#925-68072) used at a dilution of 1:5000, 2-3 h, room temperature in the dark.

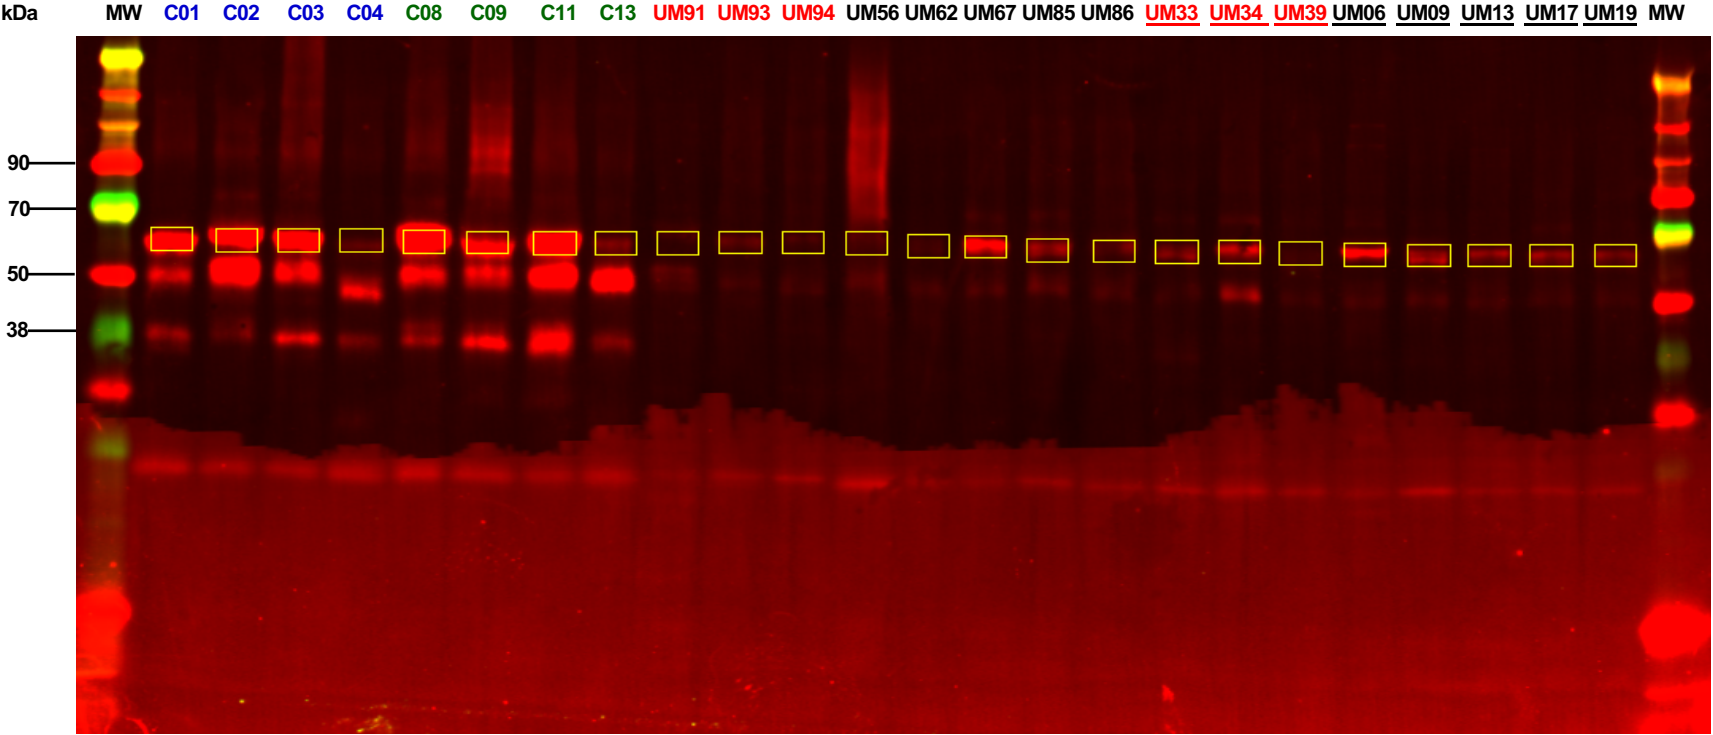

|                                       |  |  |  |  |  |  |  |  |            |      |      |      |      |      |      |      |      |            |      |      |      |      |      |      |      |      |            |      |      |      |      |      |  |  |  |           |  |  |  |  |  |  |  |  |           |  |  |  |  |  |  |  |  |
|---------------------------------------|--|--|--|--|--|--|--|--|------------|------|------|------|------|------|------|------|------|------------|------|------|------|------|------|------|------|------|------------|------|------|------|------|------|--|--|--|-----------|--|--|--|--|--|--|--|--|-----------|--|--|--|--|--|--|--|--|
| Figure S3G. Quantitation.             |  |  |  |  |  |  |  |  |            |      |      |      |      |      |      |      |      |            |      |      |      |      |      |      |      |      |            |      |      |      |      |      |  |  |  |           |  |  |  |  |  |  |  |  |           |  |  |  |  |  |  |  |  |
| Vitronectin                           |  |  |  |  |  |  |  |  | C01        | C02  | C03  | C04  | C08  | C09  | C11  | C13  | UM91 | UM93       | UM94 | UM56 | UM62 | UM67 | UM85 | UM86 | UM33 | UM34 | UM39       | UM06 | UM09 | UM13 | UM17 | UM19 |  |  |  |           |  |  |  |  |  |  |  |  |           |  |  |  |  |  |  |  |  |
| Fluorescence intensity                |  |  |  |  |  |  |  |  | 3630       | 5617 | 5906 | 1219 | 4903 | 2597 | 6777 | 1401 | 1103 | 1257       | 1137 | 1230 | 1122 | 2282 | 1565 | 1266 | 1400 | 1661 | 1116       | 2070 | 1595 | 1439 | 1452 | 1351 |  |  |  |           |  |  |  |  |  |  |  |  |           |  |  |  |  |  |  |  |  |
| Average intensity ± RSD               |  |  |  |  |  |  |  |  | 4006 ± 53% |      |      |      |      |      |      |      |      | 1370 ± 29% |      |      |      |      |      |      |      |      | 1511 ± 18% |      |      |      |      |      |  |  |  |           |  |  |  |  |  |  |  |  |           |  |  |  |  |  |  |  |  |
| Average pUM intensity / Control ± RSD |  |  |  |  |  |  |  |  |            |      |      |      |      |      |      |      |      | 0.3 ± 29%  |      |      |      |      |      |      |      |      | iTRAQ=0.3  |      |      |      |      |      |  |  |  | 0.4 ± 18% |  |  |  |  |  |  |  |  | iTRAQ=0.3 |  |  |  |  |  |  |  |  |
| Ave pUM Met / Ave pUM NoMet           |  |  |  |  |  |  |  |  |            |      |      |      |      |      |      |      |      |            |      |      |      |      |      |      |      |      | 0.9        |      |      |      |      |      |  |  |  | iTRAQ=1.0 |  |  |  |  |  |  |  |  |           |  |  |  |  |  |  |  |  |

**Figure S3H. Fluorescence immunoblot reactivity for Nidogen-2, UniProt accession number Q14112, molecular weight 151,254 Da.** The blot was probed overnight at 4°C with anti-nidogen-2 (goat pAb at 0.3 µg/mL, #AF3385, R&D Systems). Secondary antibody was donkey anti-goat from LI-COR, USA (#925-68074) used at a dilution of 1:5000, 2-3 h, room temperature in the dark.

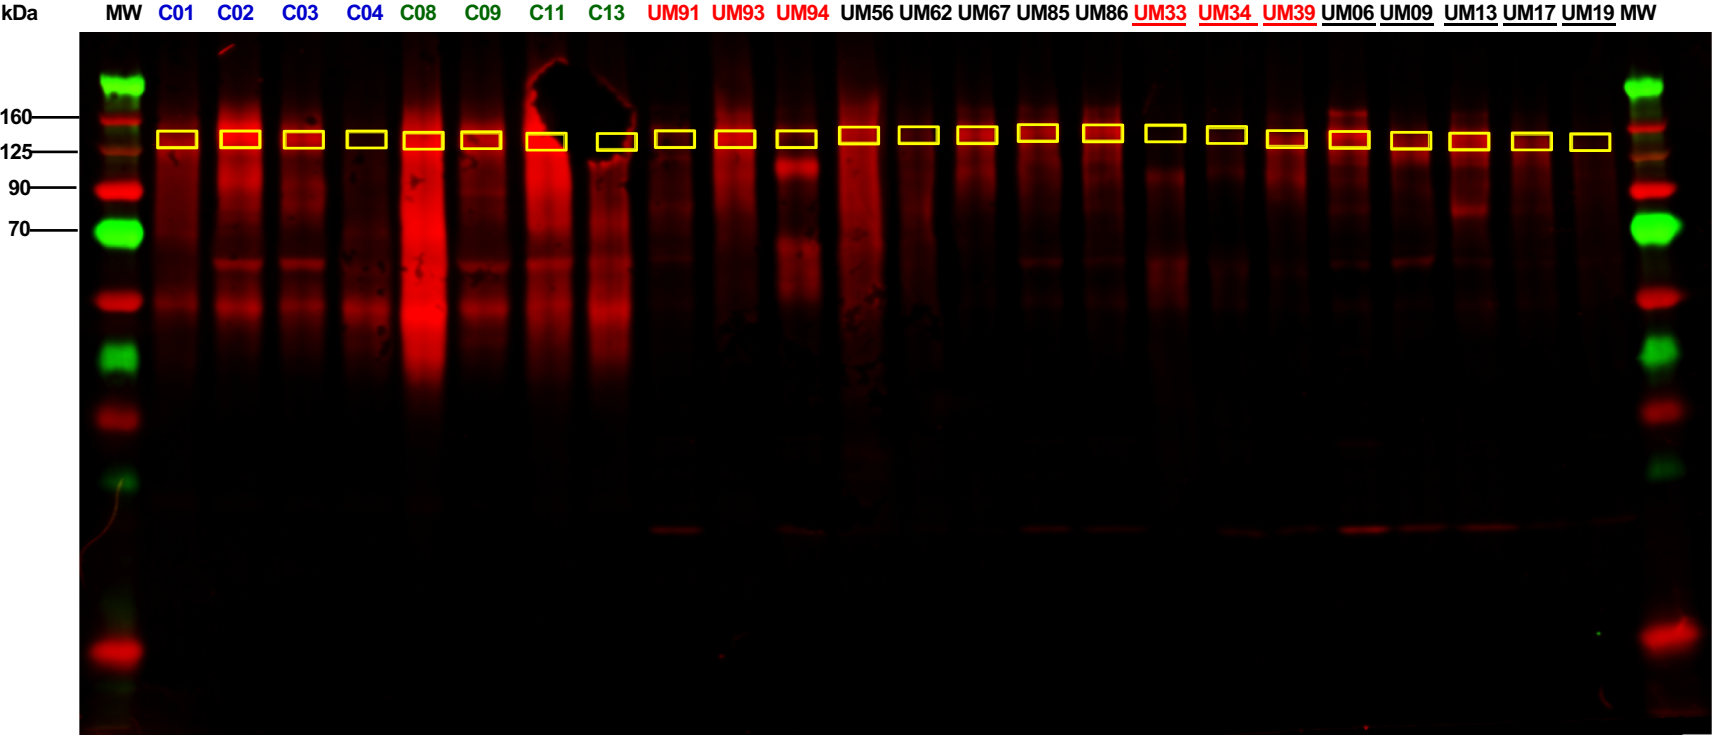

|                                       |  |            |       |      |     |       |      |       |      |      |            |      |      |      |      |      |      |      |            |      |      |      |      |      |      |  |
|---------------------------------------|--|------------|-------|------|-----|-------|------|-------|------|------|------------|------|------|------|------|------|------|------|------------|------|------|------|------|------|------|--|
| Figure S3H. Quantitation.             |  |            |       |      |     |       |      |       |      |      |            |      |      |      |      |      |      |      |            |      |      |      |      |      |      |  |
| Nidogen-2                             |  | C01        | C02   | C03  | C04 | C08   | C09  | C11   | C13  | UM91 | UM93       | UM94 | UM56 | UM62 | UM67 | UM85 | UM86 | UM33 | UM34       | UM39 | UM06 | UM09 | UM13 | UM17 | UM19 |  |
| Fluorescence intensity                |  | 3177       | 13715 | 4854 | 991 | 10283 | 4452 | 18177 | 1199 | 1386 | 6303       | 1688 | 4108 | 1424 | 4083 | 3468 | 4277 | 833  | 1140       | 2585 | 5005 | 2544 | 4342 | 2321 | 1041 |  |
| Average intensity ± RSD               |  | 7106 ± 88% |       |      |     |       |      |       |      |      | 3342 ± 52% |      |      |      |      |      |      |      | 2476 ± 62% |      |      |      |      |      |      |  |
| Average pUM intensity / Control ± RSD |  |            |       |      |     |       |      |       |      |      | 0.5 ± 52%  |      |      |      |      |      |      |      | 0.3 ± 62%  |      |      |      |      |      |      |  |
| Ave pUM Met / Ave pUM NoMet           |  |            |       |      |     |       |      |       |      |      | 1.3        |      |      |      |      |      |      |      | iTRAQ=1.3  |      |      |      |      |      |      |  |

**Figure S3I. Fluorescence immunoblot reactivity for aspartate aminotransferase, UniProt accession number P00505, molecular weight 47,518 Da.** The blot was probed overnight at 4°C with anti-aspartate aminotransferase (rabbit pAb at 1:2000, #A6915, ABclonal). Secondary antibody was goat anti-rabbit IgG from LI-COR, USA (#925-6807) used at a dilution of 1:5000, 2-3 h, room temperature in the dark.

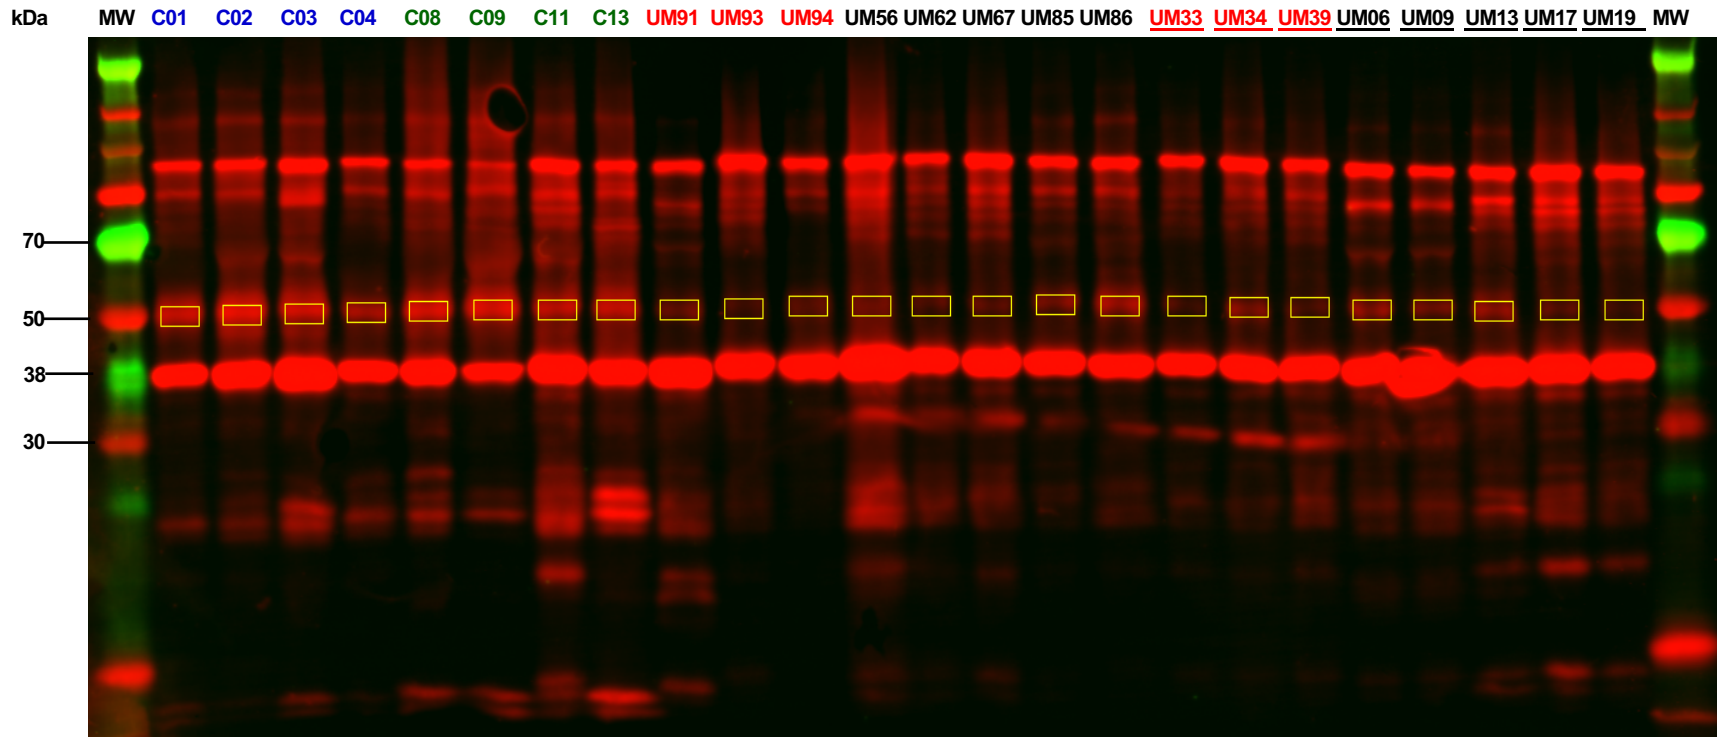

|                                           |                |      |      |      |      |      |      |      |                         |      |      |      |      |      |      |      |                         |      |      |      |      |      |      |      |
|-------------------------------------------|----------------|------|------|------|------|------|------|------|-------------------------|------|------|------|------|------|------|------|-------------------------|------|------|------|------|------|------|------|
| Figure S3I. Quantitation                  |                |      |      |      |      |      |      |      |                         |      |      |      |      |      |      |      |                         |      |      |      |      |      |      |      |
| Aspartate aminotransferase                | C01            | C02  | C03  | C04  | C08  | C09  | C11  | C13  | UM91                    | UM93 | UM94 | UM56 | UM62 | UM67 | UM85 | UM86 | UM33                    | UM34 | UM39 | UM06 | UM09 | UM13 | UM17 | UM19 |
| Fluorescence intensity                    | 4333           | 5931 | 4605 | 3059 | 5196 | 5485 | 3992 | 4214 | 1820                    | 1394 | 1709 | 2092 | 1490 | 1635 | 2042 | 3080 | 1334                    | 2162 | 1484 | 2434 | 1865 | 2554 | 1632 | 1330 |
| Average intensity $\pm$ RSD               | 4602 $\pm$ 20% |      |      |      |      |      |      |      | 1908 $\pm$ 28%          |      |      |      |      |      |      |      | 1849 $\pm$ 26%          |      |      |      |      |      |      |      |
| Average pUM intensity / Control $\pm$ RSD |                |      |      |      |      |      |      |      | 0.4 $\pm$ 28% iTRAQ=0.5 |      |      |      |      |      |      |      | 0.4 $\pm$ 26% iTRAQ=0.6 |      |      |      |      |      |      |      |
| Ave pUM Met / Ave pUM NoMet               |                |      |      |      |      |      |      |      | 1.0 iTRAQ=0.8           |      |      |      |      |      |      |      |                         |      |      |      |      |      |      |      |

**Figure S3J. Fluorescence immunoblot reactivity for lysosome membrane protein 2, UniProt accession number Q14108, molecular weight 54,290 Da.** The blot was probed overnight at 4°C with anti-lysosome membrane protein 2 (goat pAb at 0.2 µg/mL, #AF1966, R&D Systems). Secondary antibody was donkey anti-goat from LI-COR, USA (#925-68074) used at a dilution of 1:5000, 2-3 h, room temperature in the dark.

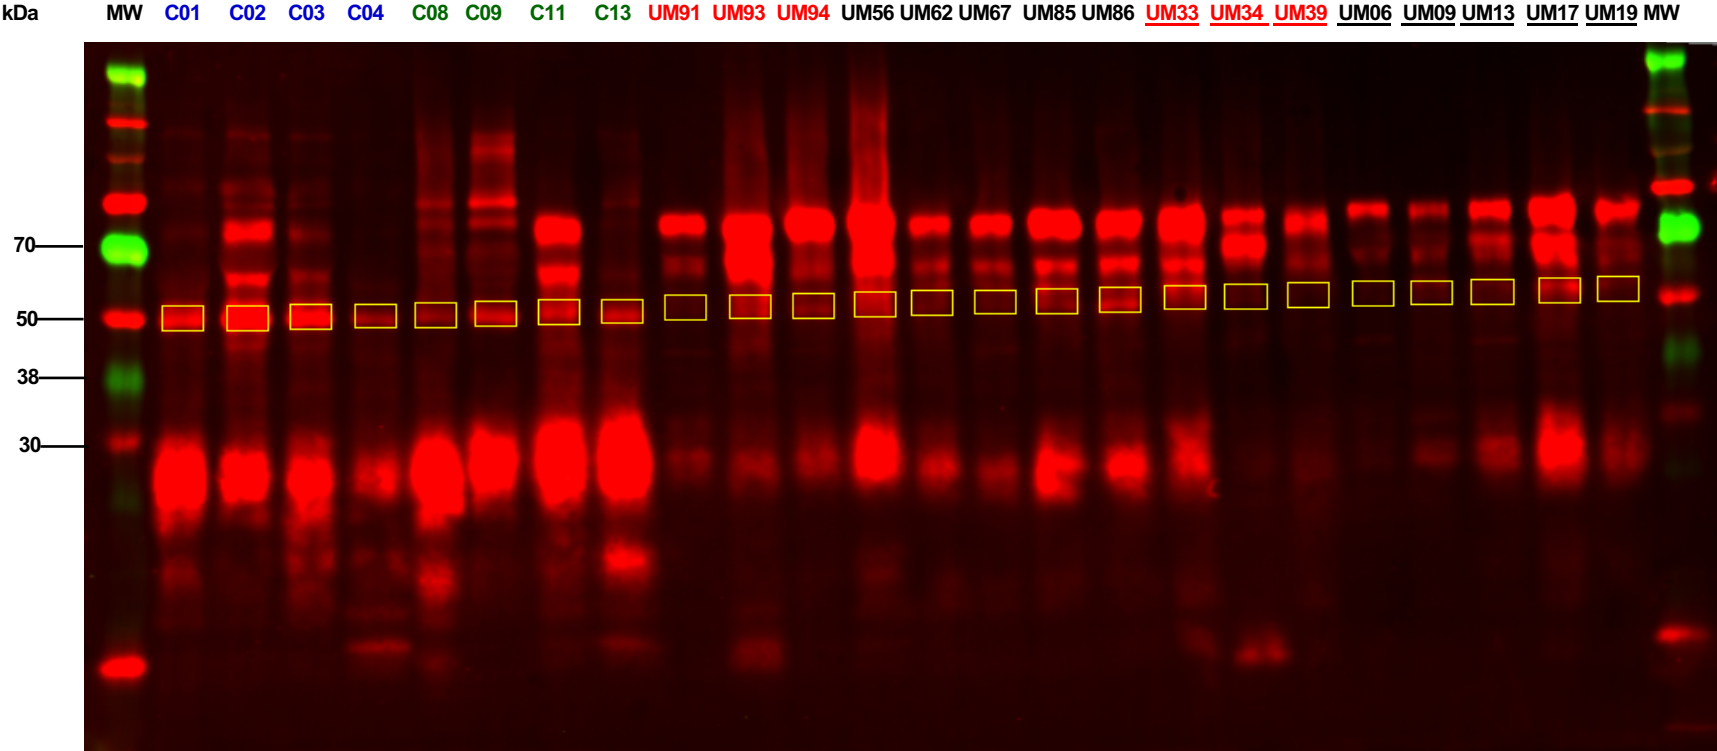

|                                       |  |            |      |      |      |      |      |      |      |      |            |      |      |      |           |      |      |      |      |            |      |      |      |           |      |  |  |
|---------------------------------------|--|------------|------|------|------|------|------|------|------|------|------------|------|------|------|-----------|------|------|------|------|------------|------|------|------|-----------|------|--|--|
| Figure S3J. Quantitation              |  |            |      |      |      |      |      |      |      |      |            |      |      |      |           |      |      |      |      |            |      |      |      |           |      |  |  |
| Lysosome membrane protein 2           |  | C01        | C02  | C03  | C04  | C08  | C09  | C11  | C13  | UM91 | UM93       | UM94 | UM56 | UM62 | UM67      | UM85 | UM86 | UM33 | UM34 | UM39       | UM06 | UM09 | UM13 | UM17      | UM19 |  |  |
| Fluorescence intensity                |  | 3597       | 5836 | 4252 | 2131 | 2125 | 2886 | 3087 | 2681 | 1431 | 2923       | 2152 | 3044 | 1796 | 1674      | 2418 | 2835 | 2729 | 1419 | 1236       | 1101 | 1496 | 1583 | 2778      | 1569 |  |  |
| Average intensity ± RSD               |  | 3324 ± 37% |      |      |      |      |      |      |      |      | 2284 ± 27% |      |      |      |           |      |      |      |      | 1739 ± 37% |      |      |      |           |      |  |  |
| Average pUM intensity / Control ± RSD |  |            |      |      |      |      |      |      |      |      | 0.7 ± 27%  |      |      |      | iTRAQ=0.8 |      |      |      |      | 0.5 ± 37%  |      |      |      | iTRAQ=0.7 |      |  |  |
| Ave pUM Met / Ave pUM NoMet           |  |            |      |      |      |      |      |      |      |      |            |      |      |      | 1.3       |      |      |      |      | iTRAQ=1.2  |      |      |      |           |      |  |  |



**Figure S3L. Fluorescence immunoblot reactivity for cAMP-dependent protein kinase type II-alpha regulatory subunit, UniProt accession number P13861, molecular weight 45,518 Da.** The blot was probed overnight at 4°C with anti-cAMP-dependent protein kinase type II-alpha regulatory subunit (rabbit mAb at 0.6 µg/mL, # MAB8000, R&D Systems). Secondary antibody was goat anti-rabbit IgG from LI-COR, USA (#925-6807) used at a dilution of 1:5000, 2-3 h, room temperature in the dark.

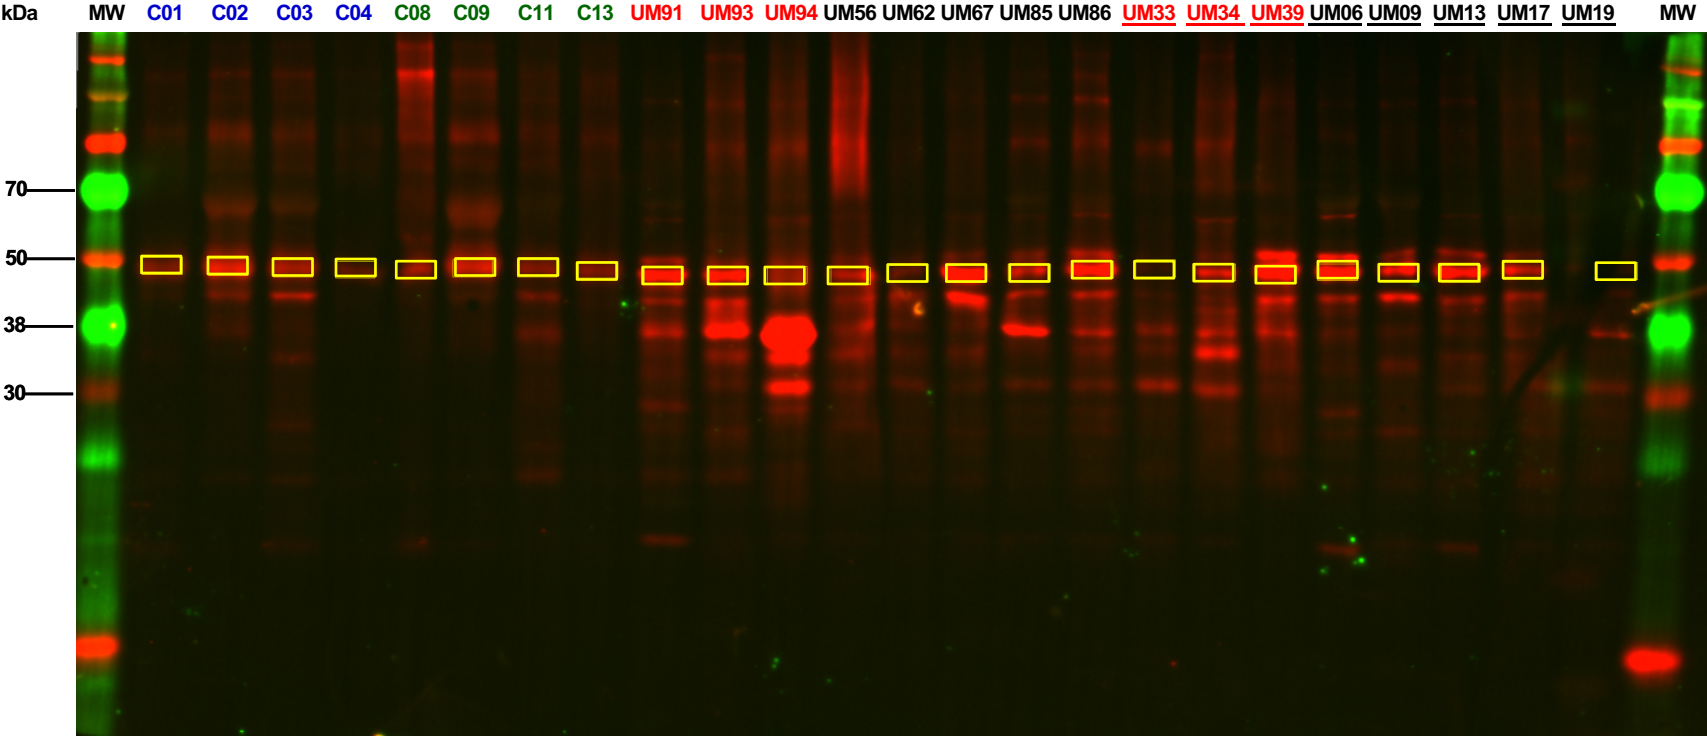

|                                                   |  |                |      |      |      |      |      |      |      |      |                         |      |      |      |      |      |      |      |      |                         |      |      |      |      |      |
|---------------------------------------------------|--|----------------|------|------|------|------|------|------|------|------|-------------------------|------|------|------|------|------|------|------|------|-------------------------|------|------|------|------|------|
| Figure S3L. Quantitation                          |  |                |      |      |      |      |      |      |      |      |                         |      |      |      |      |      |      |      |      |                         |      |      |      |      |      |
| cAMP-Dependent protein kinase type II- $\alpha$ p |  | C01            | C02  | C03  | C04  | C08  | C09  | C11  | C13  | UM91 | UM93                    | UM94 | UM56 | UM62 | UM67 | UM85 | UM86 | UM33 | UM34 | UM39                    | UM06 | UM09 | UM13 | UM17 | UM19 |
| Fluorescence intensity                            |  | 1624           | 2800 | 2095 | 1198 | 1644 | 2506 | 1627 | 1633 | 3401 | 3097                    | 2040 | 2239 | 1175 | 4421 | 2074 | 3454 | 890  | 2176 | 4494                    | 4094 | 2234 | 2982 | 2009 | 584  |
| Average intensity $\pm$ RSD                       |  | 1891 $\pm$ 28% |      |      |      |      |      |      |      |      | 2738 $\pm$ 38%          |      |      |      |      |      |      |      |      | 2433 $\pm$ 57%          |      |      |      |      |      |
| Average pUM intensity / Control $\pm$ RSD         |  |                |      |      |      |      |      |      |      |      | 1.4 $\pm$ 38% iTRAQ=0.6 |      |      |      |      |      |      |      |      | 1.3 $\pm$ 57% iTRAQ=0.8 |      |      |      |      |      |
| Ave pUM Met / Ave pUM NoMet                       |  |                |      |      |      |      |      |      |      |      | 1.1 iTRAQ=0.8           |      |      |      |      |      |      |      |      |                         |      |      |      |      |      |
