# Supplementary material for: Proteomics of Primary Uveal Melanoma: Insights into Metastasis and Protein Biomarkers
Source: Cancers (Basel). 2021 Jul 14;13(14):3520. doi: 10.3390/cancers13143520 (PMC8307952; doi:10.3390/cancers13143520)
Supplement: Supplementary file 1 [file cancers-13-03520-s001.zip › Table S1. Specimen Properties.xlsx]

## Sheet: Table S1.-All pUM Samples v1
Supplementary Table S1. Properties of Uveal Melanoma Primary Tumor Specimens used for Proteomic Analysis
1Sample Number	Specimen Source	Gender	Age at Diagnosis (y)	Sample Collection Date	Sampled Specimen	Donor Status	2Cause of Death	Metastasis	3Chromosome Status/GEP Class	3Prognostic Genetic Test	Ocular Tumor Location	Cell Type
UM1	Liverpool	F	54	2006	Enucleation	Alive 2020		No	Disomy 3	FISH	Choroid	epithelioid
UM2	Liverpool	F	43	2010	Local Resection	Alive 2020		No	Disomy 3	MLPA	Choroid	spindle
UM3*	Liverpool	M	57	2011	Enucleation	Alive 2020		No	Disomy 3	MLPA	Choroid	spindle
UM4	Liverpool	F	56	2010	Enucleation	Alive 2020		No	Disomy 3	MLPA	Choroid	epithelioid
UM5	Liverpool	F	29	2010	Local Resection	Alive 2020		No	Disomy 3	MLPA	Choroid	spindle
UM6*	Liverpool	F	74	2011	Enucleation	Alive 2020		No	Disomy 3	MLPA	Choroid	spindle
UM7*	Liverpool	F	65	2011	Enucleation	Alive 2020		No	Disomy 3	MLPA	Choroid	spindle
UM8	Liverpool	F	60	2008	Enucleation	unknown		No	Disomy 3	MLPA	Choroid	epithelioid
UM9*	Liverpool	M	60	2010	Enucleation	Alive 2020		No	Disomy 3	MLPA	Choroid	spindle
UM10*	Liverpool	M	80	2011	Enucleation	Deceased 2020	Unknown	No	Disomy 3	MLPA	Choroid	epithelioid
UM11	Liverpool	F	32	2009	Enucleation	Alive 2020		No	Disomy 3	MLPA	Choroid	spindle
UM12*	Liverpool	F	67	2011	Enucleation	Alive 2020		No	Disomy 3	MLPA	Choroid	epithelioid
UM13	Liverpool	M	63	2011	Enucleation	Alive 2020		No	Disomy 3	MLPA	Choroid	spindle
UM14*	Liverpool	M	30	2010	Enucleation	Alive 2020		No	Disomy 3	MLPA	Choroid	spindle
UM15	Liverpool	F	71	2011	Enucleation	Alive 2020		No	Disomy 3	MLPA	Choroid	spindle
UM16	Liverpool	F	53	2011	Enucleation	Alive 2020		No	Disomy 3	MLPA	Ciliochoroidal	epithelioid
UM17	Liverpool	F	66	2009	Enucleation	Alive 2020		No	Disomy 3	MLPA	Choroid	epithelioid
UM18	Liverpool	M	71	2009	Enucleation	Alive 2020		No	Disomy 3	MLPA	Ciliochoroidal	spindle
UM19	Liverpool	M	58	2009	Enucleation	Alive 2020		No	Disomy 3	MLPA	Ciliochoroidal	epithelioid
UM20	Liverpool	M	64	2010	Local Resection	Deceased 2019	unknown	No	Disomy 3	MLPA	Ciliochoroidal	spindle
UM21	Liverpool	M	49	2011	Local Resection	Alive 2020		No	Disomy 3	MLPA	Choroid	spindle
UM22	Liverpool	F	62	2010	Enucleation	Deceased 2018	unknown	No	Disomy 3	MLPA	Ciliochoroidal	spindle
UM23	Liverpool	M	46	2011	Enucleation	Alive 2020		No	Disomy 3	MLPA	Choroid	spindle
UM24	Liverpool	M	53	2011	Enucleation	Alive 2020		No	Disomy 3	MLPA	Choroid	epithelioid
UM25	Liverpool	F	65	2011	Enucleation	Alive 2020		No	Disomy 3	MLPA	Choroid	epithelioid
UM26	Liverpool	F	60	2011	Enucleation	Alive 2020		No	Disomy 3	MLPA	Choroid	epithelioid
UM27	Liverpool	M	60	2009	Enucleation	Alive 2020		No	Disomy 3	MLPA	Choroid	spindle
UM28	Liverpool	M	71	2011	Enucleation	Alive 2020		No	Disomy 3	MLPA	Choroid	spindle
UM29	Liverpool	M	73	2011	Enucleation	Alive 2020		No	Disomy 3	MLPA	Choroid	spindle
UM30	Liverpool	F	57	2011	Enucleation	Alive 2020		No	Disomy 3	MLPA	Choroid	epithelioid
UM31	Cleveland	F	28	2014	Enucleation	Alive 2017		No	class 1A	GEP	ciliochoroidal	spindle
UM32	Cleveland	M	76	2016	Enucleation	Alive 2021		Yes	class 1A	GEP	choroid	mixed
UM33	Cleveland	F	52	2016	Enucleation	Alive 2021		No	class 1A	GEP	choroid	epithelioid
UM34	Cleveland	F	84	2016	Enucleation	Deceased 2017	unkown	No	class 1A	GEP	choroid	mixed
UM35	Cleveland	M	72	2015	Enucleation	Alive 2017		No	class 1A	GEP	choroid	mixed
UM36	Cleveland	M	57	2016	Enucleation	Alive 2021		No	class 1A	GEP	choroid	mixed
UM37	Cleveland	F	71	2016	Enucleation	Deceased 2019	MM	Yes	class 1A	GEP	choroid	mixed
UM38	Cleveland	F	83	2016	Enucleation	Deceased 2020	unknown	No	class 1B	GEP	choroid	mixed
UM39	Cleveland	M	64	2016	Enucleation	Alive 2017		No	class 1B	GEP	choroid	mixed
UM40	Cleveland	F	52	2016	Enucleation	Alive 2021		No	class 1B	GEP	ciliochoroidal	mixed
UM41	Cleveland	F	50	2014	Enucleation	Deceased 2020	COVID	No	class 2	GEP	choroid	mixed
UM42	Cleveland	F	69	2014	Enucleation	Deceased 2018	Septic shock	No	class 2	GEP	ciliochoroidal	mixed
UM43	Cleveland	F	82	2016	Enucleation	Deceased 2018	MM	Yes	class 2	GEP	ciliochoroidal	epithelioid
UM44	Cleveland	F	82	2016	Enucleation	Deceased 2018	MM	Yes	class 2	GEP	choroid	mixed
UM45	Cleveland	M	60	2016	Enucleation	Alive 2021		No	class 2	GEP	ciliochoroidal	epithelioid
UM46	Cleveland	M	63	2017	Enucleation	Alive 2020		No	class 2	GEP	choroid	epithelioid
UM47	Cleveland	M	71	2013	Enucleation	Alive 2017		No	Monosomy 3	FISH	ciliochoroidal	mixed
UM48	Cleveland	M	56	2013	Enucleation	Deceased 2016	MM	Yes	Monosomy 3	FISH	ciliochoroidal	mixed
UM49	Cleveland	M	83	2014	Enucleation	Deceased 2016	MM	Yes	Monosomy 3	FISH	Iridociliochoroidal	epithelioid
UM50	Cleveland	F	77	2014	Enucleation	Alive 2017		No	Monosomy 3	FISH	ciliary body	mixed
UM51	Cleveland	M	67	2015	Enucleation	Deceased 2019	MM	Yes	Monosomy 3	MLPA	choroid	mixed
UM52	Cleveland	F	69	2016	Enucleation	Deceased 2019	MM	Yes	monosomy 3	MLPA	ciliochoroidal	mixed
UM53	Cleveland	M	54	2015	Enucleation	Alive 2017		No	Monosomy 3	MLPA	choroid	mixed
UM54	Cleveland	M	78	2015	Enucleation	Alive 2020		No	Monosomy 3	MLPA	choroid	mixed
UM55	Cleveland	M	65	2015	Enucleation	Alive 2020		No	Monosomy 3	MLPA	ciliochoroidal	mixed
UM56	Liverpool	M	44	2009	Enucleation	Deceased 2012	MM	Yes	Monosomy 3	MLPA	Choroid	epithelioid
UM57	Liverpool	M	64	2010	Enucleation	Deceased 2011	MM	Yes	Monosomy 3	MLPA	Ciliochoroidal	epithelioid
UM58	Liverpool	M	83	2012	Enucleation	Deceased 2012	MM	Yes	Monosomy 3	MLPA	Choroid	epithelioid
UM59	Liverpool	F	69	2011	Enucleation	Deceased 2013	MM	Yes	Monosomy 3	MLPA	Choroid	epithelioid
UM60	Liverpool	F	62	2009	Enucleation	Deceased 2009	MM	Yes	Monosomy 3	MLPA	Ciliochoroidal	epithelioid
UM61*	Liverpool	F	53	2010	Enucleation	Deceased 2013	MM	Yes	Monosomy 3	MLPA	Ciliochoroidal	epithelioid
UM62*	Liverpool	M	80	2011	Enucleation	Deceased 2014	MM	Yes	Monosomy 3	MLPA	Choroid	epithelioid
UM63	Liverpool	M	74	2011	Enucleation	Deceased 2013	MM	Yes	Monosomy 3	MLPA	Choroid	epithelioid
UM64	Liverpool	M	75	2008	Local Resection	Deceased 2008	MM	Yes	Monosomy 3	MLPA	Ciliochoroidal	spindle
UM65*	Liverpool	M	76	2011	Enucleation	Deceased 2013	MM	Yes	Monosomy 3	MLPA	Ciliochoroidal	epithelioid
UM66	Liverpool	F	58	2009	Enucleation	Deceased 2012	MM	Yes	Monosomy 3	MLPA	Ciliochoroidal	epithelioid
UM67	Liverpool	F	62	2011	Local Resection	Deceased 2012	MM	Yes	Monosomy 3	MLPA	Ciliochoroidal	spindle
UM68*	Liverpool	F	84	2010	Enucleation	Deceased 2013	MM	Yes	Monosomy 3	MLPA	Ciliochoroidal	epithelioid
UM69*	Liverpool	M	53	2011	Enucleation	Deceased 2011	MM	Yes	Monosomy 3	MLPA	Choroid	epithelioid
UM70	Liverpool	M	62	2009	Enucleation	Deceased 2013	MM	Yes	Monosomy 3	MLPA	Ciliochoroidal	epithelioid
UM71	Liverpool	M	66	2011	Enucleation	Deceased 2014	MM	Yes	Monosomy 3	MLPA	Choroid	epithelioid
UM72	Liverpool	M	61	2011	Enucleation	Deceased 2013	MM	Yes	Monosomy 3	MLPA	Ciliochoroidal	epithelioid
UM73	Liverpool	F	71	2011	Enucleation	Deceased 2014	MM	Yes	Monosomy 3	MLPA	Ciliochoroidal	epithelioid
UM74	Liverpool	F	62	2009	Enucleation	Deceased 2010	MM	Yes	Monosomy 3	MLPA	Choroid	epithelioid
UM75	Liverpool	F	52	2009	Local Resection	Deceased 2014	MM	Yes	Monosomy 3	MLPA	Choroid	spindle
UM76	Liverpool	F	57	2011	Enucleation	Deceased 2011	MM	Yes	Monosomy 3	MLPA	Choroid	spindle
UM77	Liverpool	M	54	2011	Enucleation	Deceased 2016	MM	Yes	Monosomy 3	MLPA	Choroid	epithelioid
UM78	Liverpool	F	58	2009	Enucleation	Deceased 2015	MM	Yes	Monosomy 3	MLPA	Choroid	epithelioid
UM79	Liverpool	F	53	2011	Enucleation	Deceased 2015	MM	Yes	Monosomy 3	MLPA	Ciliochoroidal	epithelioid
UM80	Liverpool	M	81	2009	Enucleation	Deceased 2015	MM	Yes	Monosomy 3	MLPA	Ciliochoroidal	epithelioid
UM81*	Liverpool	M	65	2010	Enucleation	Deceased 2011	MM	Yes	Monosomy 3	MLPA	Choroid	epithelioid
UM82	Liverpool	F	66	2010	Enucleation	Deceased 2016	MM	Yes	Monosomy 3	MLPA	Ciliochoroidal	epithelioid
UM83	Liverpool	F	80	2009	Enucleation	Deceased 2010	MM	Yes	Monosomy 3	MLPA	Ciliochoroidal	epithelioid
UM84	Liverpool	F	43	2011	Local Resection	Deceased 2013	MM	Yes	Monosomy 3	MLPA	Choroid	epithelioid
UM85	Liverpool	F	68	2011	Enucleation	Deceased 2016	MM	Yes	Monosomy 3	MLPA	Ciliochoroidal	epithelioid
UM86	Liverpool	M	70	2011	Enucleation	Deceased 2013	MM	Yes	Monosomy 3	MLPA	Ciliochoroidal	epithelioid
UM87	Liverpool	F	48	2011	Enucleation	Deceased 2013	MM	Yes	Monosomy 3	MLPA	Choroid	epithelioid
UM88	Liverpool	M	67	2011	Enucleation	Deceased 2012	MM	Yes	Monosomy 3	MLPA	Ciliochoroidal	epithelioid
UM89	Cleveland	M	67	2013	Enucleation	Deceased 2019	MM	Yes	Monosomy 3	FISH	choroid	epithelioid; necrosis
UM90	Cleveland	M	82	2013	Enucleation	Deceased 2019	Cardiac issues	Yes	Monosomy 3	FISH	juxtapapillary choroid	mixed
UM91	Cleveland	M	54	2013	Enucleation	Alive 2021		Yes	Disomy 3	FISH	choroid	epithelioid
UM92	Cleveland	M	68	2014	Enucleation	Alive 2017		Yes	Monosomy 3	FISH	choroid	mixed
UM93	Cleveland	M	52	2015	Enucleation	Alive 2021		Yes	class 2	GEP	choroid	mixed
UM94	Cleveland	M	59	2016	Enucleation	Deceased 2017	MM	Yes	class 2	GEP	ciliochoroidal	epithelioid
UM95**	Cleveland	M	51	2007	Enucleation	Deceased 2015	MM	Yes	Monosomy3	FISH	choroid	spindle>epithelioid
UM96**	Cleveland	F	86	2008	Enucleation	Deceased 2015	MM	Yes	Monosomy 3	FISH	ciliary body, choroid	epithelioid>spindle
UM97**	Cleveland	M	56	2005	Enucleation	Deceased 2015	MM	Yes	Monosomy 3	FISH	ciliary body, choroid	spindle>epithelioid
UM98**	Cleveland	M	66	2008	Enucleation	Deceased 2015	MM	Yes	Monosomy 3	FISH	iris, ciliary body, choroid	spindle>epithelioid
UM99**	Cleveland	M	75	2007	Enucleation	Deceased 2015	MM	Yes	Monosomy 3	FISH	ciliary body, choroid	spindle=epithelioid
UM100**	Cleveland	F	78	2008	Enucleation	Deceased 2015	MM	Yes	Disomy 3	SNP	ciliary body, choroid	spindle>epithelioid
1. *Normal choroid tissue was excised distant from the pUM and used in a pooled choroid control; **pUM Specimens previously analyzed [(2015) PLoS One 10:e135543] and re-analyzed in this study using an Orbitrap Fusion Lumos Tribrid mass spectrometer. 2. MM, metastatic melanoma. 3. Prognostic genetic tests were as indicated: FISH, fluorescent in situ hybridization analyses; MLPA, multiplex ligation…
