# Supplementary material for: Proteomics of Primary Uveal Melanoma: Insights into Metastasis and Protein Biomarkers
Source: Cancers (Basel). 2021 Jul 14;13(14):3520. doi: 10.3390/cancers13143520 (PMC8307952; doi:10.3390/cancers13143520)
Supplement: Supplementary file 1 [file cancers-13-03520-s001.zip › Table S2. Choroid Control Individual LC MSMS iTRAQ Data.xlsx]

## Sheet: TablesS2-Choroid Controls
Supplementary Table S2. Individual Choroid Tissues Excised from UM Eyes- iTRAQ Quantitative Proteomic Results
Control Sample		C1	C2	C3	C4	C5	C6	C7	C8	C9	C10	C11	C12	C13		Average C1-C7			Average C8-C13			Average C1-C13
Metastatic pUM Eye		No	No	No	No	No	No	No	Yes	Yes	Yes	Yes	Yes	Yes		No			Yes			All 13 Samples
Control Analysis Batch		2	2	2	1	2	1	1	2	2	1	1	1	1		1+2			1+2			1+2
Total proteins quantified		1623	1617	1624	2354	1623	2346	2344	1616	1612	2349	2352	2350	2349		2504			2504			2504
Standard Deviation		0.553808	0.553617	0.553395	0.608508	0.554	0.610931	0.607137	0.553332	0.549895	0.607508	0.608758	0.611168	0.61158		0.517996			0.542081			0.526649
UniProt Accession	Gene	LN Ratio														Ave LN Ratio	SEM		Ave LN Ratio	SEM		Ave LN Ratio	SEM
P04217	A1BG	0.999629	1.02501	0.161738	1.17869	0.728136	0.907559	-0.0182071	0.638443	1.05363	-0.0428018	0.377474	0.677241	0.827699		0.711795	0.174097		0.588615	0.155671		0.654942	0.114607
P01023	A2M	0.773379	0.571856	0.156534	1.40678	1.00498	1.56201	-0.198076	1.3206	1.36339	0.497622	0.553678	0.572953	0.866774		0.753923	0.240978		0.862502	0.160531		0.804036	0.144341
P49588	AARS1	0.553485	0.952689	0.935427	0.390691	0.639724	0.534068	0.755483	0.875381	0.980343	0.698375	0.722375	0.669831	0.512366		0.680224	0.0798695		0.743112	0.0670371		0.709249	0.05161
P80404	ABAT	-0.00107482	0.0869796	0.725975	0.0843173	-0.0483178	-0.0313709	0.504835	-0.0735255	0.04197	0.636861	0.174045	-0.192988	-0.0931375		0.188763	0.114484		0.0822042	0.12226		0.139582	0.081476
P78363	ABCA4	0.0967432	0.734668	0.987295	0.790931	1.18953	0.83611	1.31358	0.665376	0.714853	1.21686	1.40646	0.650558	0.765576		0.849836	0.149078		0.903281	0.132471		0.874503	0.0970428
O94911	ABCA8	-0.9072	-0.84815	-0.724461	-0.609604	-0.950602	-0.500933	-0.54448	-0.727464	-0.882966	-0.689902	-0.374405	-0.811475	-0.550163		-0.72649	0.0682003		-0.672729	0.0754454		-0.701677	0.0490586
P08183	ABCB1	-1.2179	-1.3158	-1.1861	-0.860382	-1.21443	-0.79076	-1.14083	-1.24391	-1.23248	-1.01071	-1.01124	-1.09344	-0.70351		-1.10374	0.0748959		-1.04922	0.0808059		-1.07858	0.0531741
Q9NP58	ABCB6	0.122527	0.215077	0.710888	-0.251733	0.273717	0.184639	0.759718	0.113745	0.201213	0.955125	0.701267	0.364933	0.366984		0.287833	0.1324		0.450545	0.130048		0.362931	0.0923052
Q09428	ABCC8	0.223007	-0.201016	-0.216865	-0.137898	-0.215259	-0.197435	-0.330944	-0.350554	0.444309	-0.226048	-0.310694	-0.208958	-0.223417		-0.153773	0.0664587		-0.145893	0.120249		-0.150136	0.0630171
P28288	ABCD3	0.0087688	0.171451	-0.301346	-0.0672321	0.212795	0.0428469	-0.158236	0.163778	0.111723	-0.0276324	0.0812273	0.228904	0.22175		-0.0129933	0.068274		0.129958	0.0395398		0.0529844	0.0444842
P61221	ABCE1	0.360006	0.281887	-0.0322148	0.777835	0.197348	0.692593	0.181231	0.474118	0.0704998	0.43617	0.385681	0.740055	0.5631		0.351241	0.109437		0.444937	0.0904986		0.394485	0.0705781
Q8NE71	ABCF1	0.0247017	0.0253216	0.0295925	0.0913653	0.0226619	0.0792321	-0.196615	0.0387983	-0.0969296	0.198853	-0.0813613	-0.0373805	-0.195295		0.0108944	0.0362178		-0.0288859	0.0552551		-0.00746576	0.031194
Q9NUQ8	ABCF3	-0.157023	-0.157047	-0.155456	-0.365557	-0.251355	-0.0217493	-0.228116	-0.113417	-0.149194	-0.156959	-0.20076	-0.299177	-0.11098		-0.190901	0.0401506		-0.171748	0.0288112		-0.182061	0.0245204
Q9NUJ1	ABHD10	0.47643	0.596566	0.897127	0.930185	0.0561877	0.382109	0.551127	0.642687	0.36588	0.335815	0.42216	0.468519	0.59239		0.555676	0.113854		0.471242	0.0503086		0.516706	0.0642209
Q96IU4	ABHD14B	0.210286	-0.0305769	-0.213005	0.0928138	0.121106	0.134086	-0.394619	-0.105464	0.17945	-0.301434	-0.20076	-0.077312	-0.50583		-0.0114155	0.0826061		-0.168558	0.0941385		-0.083943	0.0636618
Q7Z7G0	ABI3BP	-0.859675	-0.541991	-0.772967	-0.732403	-0.44385	-0.708712	-0.752208	-0.664464	-0.434477	-0.681699	-0.579188	-0.0551646	-0.652566		-0.687401	0.0543666		-0.51126	0.0984921		-0.606105	0.057479
Q12979	ABR	0.445654	0.0783874	0.129135	1.1043	0.371138	0.600459	0.115545	0.270397	0.285503	0.576843	0.263437	0.545842	0.545694		0.406374	0.137717		0.414619	0.06352		0.410179	0.0767043
P09110	ACAA1	0.219543	0.475267	-0.219608	0.158295	-0.107743	0.065018	-0.292612	0.425211	0.218163	-0.191098	-0.167141	0.284635	0.197169		0.0425941	0.101901		0.127823	0.102423		0.0819307	0.070452
P42765	ACAA2	0.164341	0.14872	-0.343041	0.348775	0.0595544	0.236076	-0.0738417	0.0163851	0.0620946	-0.194156	-0.0813613	0.280661	0.369246		0.0772263	0.0861105		0.0754782	0.0874398		0.0764195	0.0588791
Q13085	ACACA	-0.0501612	0.00707799	-0.118574	-0.0830527	0.069279	0.0818464	0.0053261	-0.057441	-0.0285404	0.081719	0.0119062	0.388279	0.573298		-0.0126084	0.0284261		0.161537	0.105483		0.0677664	0.0546385
Q9H845	ACAD9	0.111798	0.193673	0.00688742	-0.296407	-0.11559	-0.252324	-0.310527	0.205755	0.139103	-0.303459	-0.202166	-0.487493	-0.363581		-0.0946413	0.076946		-0.16864	0.114579		-0.128795	0.0650546
P11310	ACADM	-0.205213	0.138793	-0.0119383	0.228537	-0.916043	0.456731	0.218654	-0.732701	0.348498	0.350416	0.692347	0.418108	0.534553		-0.0129256	0.169602		0.268537	0.20723		0.11698	0.132829
P16219	ACADS	0.348954	0.241769	-0.195434	-0.038822	0.403642	0.544177	-0.142844	0.422232	0.214536	0.105566	0.360441	0.393631	0.227936		0.16592	0.109835		0.28739	0.0505664		0.221983	0.063602
P45954	ACADSB	0.0641038	0.0081448	-0.0688014	-0.0749824	0.0032812	0.148405	-0.159432	0.17152	-0.0752262	-0.0311044	0.078529	-0.180826	-0.0345956		-0.0113258	0.0381373		-0.0119506	0.0500835		-0.0116142	0.0295629
P49748	ACADVL	0.262865	0.128759	-0.24969	-0.0709677	0.176715	-0.0260136	-0.389869	0.103761	0.04197	-0.368705	-0.310116	-0.053684	0.0871445		-0.0240287	0.0890317		-0.0832717	0.0843632		-0.0513716	0.0597952
P24752	ACAT1	0.31597	0.569311	0.210099	0.304259	0.537424	0.440589	0.503636	0.496504	0.32054	-0.0419125	0.63332	0.362281	0.437699		0.411613	0.0514747		0.368072	0.0934665		0.391517	0.0493216
Q9BWD1	ACAT2	1.00498	0.590598	0.343504	0.546624	1.02166	0.827238	0.420847	0.98489	0.870561	0.440945	0.628327	0.551785	0.792274		0.67935	0.103532		0.711464	0.0841018		0.694172	0.0653255
Q9UKV3	ACIN1	-0.0465209	-0.0674207	0.175499	0.0345886	-0.0192725	-0.143249	0.309988	0.0131964	-0.0254029	0.304637	0.00780376	0.0302635	0.0437848		0.0348017	0.0592034		0.0623804	0.049386		0.0475303	0.0377949
P53396	ACLY	-0.0877653	-0.129457	-0.264864	0.122808	-0.0281517	0.345466	-0.133419	-0.224335	-0.00107774	-0.00950097	-0.170889	-0.125547	0.0853628		-0.0250546	0.0761018		-0.0743312	0.0481383		-0.0477977	0.0453339
P21399	ACO1	0.843496	0.886987	0.597172	0.807072	0.795245	0.881493	0.617617	0.838884	0.643275	0.526415	0.755161	0.577355	0.787238		0.775583	0.0453561		0.688055	0.0508189		0.735185	0.0347731
Q99798	ACO2	0.610869	0.592617	0.502039	0.468361	0.379857	0.466871	0.499105	0.662993	0.285719	0.388747	0.45101	0.486044	0.54892		0.502817	0.0298218		0.470572	0.05312		0.487935	0.028348
Q86TX2	ACOT1	0.141394	0.0356219	-0.264864	0.155665	-0.0849361	0.288201	0.449061	0.123441	0.045126	0.0452664	-0.260021	0.535039	0.0767177		0.102878	0.0891079		0.0942615	0.104207		0.0989009	0.0650199
O00154	ACOT7	-0.108654	-0.0725755	0.293564	-0.17808	-0.039486	-0.149655	0.447031	-0.084651	0.00328411	0.309269	0.183448	0.00271415	0.00111437		0.0274492	0.0917402		0.0691964	0.0599324		0.0467171	0.0547061
Q9Y305	ACOT9	-0.832396	-0.823441	-0.641946	-1.05954	-0.804488	-1.12102	-0.683256	-0.802688	-0.863999	-0.891355	-0.778432	-0.835079	-1.01337		-0.852299	0.0675241		-0.864154	0.0341454		-0.85777	0.0381403
Q15067	ACOX1	1.18072	0.769193	0.355998	0.405701	0.893271	0.314584	0.101992	0.800065	0.646392	0.253777	-0.0208978	0.382519	0.537683		0.574494	0.144261		0.433256	0.119989		0.509307	0.0937279
O15254	ACOX3	0.0166008	-0.0239795	-0.289937	0.134766	-0.0315179	0.0525288	-0.531766	-0.0301661	0.0262559	-0.314228	-0.224633	-0.118012	0.0717828		-0.0961864	0.0879449		-0.0981668	0.0611169		-0.0971005	0.0529218
P24666	ACP1	0.765589	0.726613	0.609997	1.0079	0.845413	0.512816	0.78359	0.793511	0.647787	0.907929	0.442964	0.875366	0.822814		0.750274	0.0604333		0.748395	0.0713107		0.749407	0.0442863
P11117	ACP2	0.201316	0.0554309	-0.296916	-0.204948	0.226627	-0.202787	-0.55564	0.261976	0.0659955	-0.371296	-0.605818	-0.294432	-0.307775		-0.110988	0.107875		-0.208558	0.12888		-0.15602	0.0807738
P33121	ACSL1	0.31597	0.599029	0.293652	-0.164564	0.0739286	-0.320934	-0.316869	0.389588	0.396602	-0.481197	-0.243845	-0.0551646	0.0755817		0.0686019	0.133445		0.0135942	0.142329		0.0432137	0.0935558
O95573	ACSL3	-0.188078	-0.189219	-0.211022	0.132336	-0.32956	-0.135127	-0.348374	-0.185301	-0.323342	-0.262863	-0.476781	-0.420522	-0.184229		-0.181292	0.0600369		-0.30884	0.0495953		-0.24016	0.0421943
Q9ULC5	ACSL5	0.269555	0.316283	-0.140941	0.0737819	0.654883	0.221723	0.0241416	0.313445	0.333979	-0.0606888	0.171296	0.198372	0.282797		0.202775	0.0962134		0.206533	0.0594992		0.20451	0.0563326
Q9UKU0	ACSL6	0.108002	0.101786	0.837517	0.33285	0.140808	0.158992	0.861798	0.101774	0.261974	1.08294	0.64157	0.209049	0.301812		0.363108	0.129018		0.433186	0.149694		0.395452	0.0943002
Q9NUB1	ACSS1	-0.205967	-0.209109	-0.184592	-0.305994	-0.364042	-0.029631	0.0516574	-0.236112	-0.257991	-0.0763557	0.0504227	-0.242044	-0.107605		-0.17824	0.0551066		-0.144948	0.0499288		-0.162874	0.036331
P68133	ACTA1	-0.324358	-0.180843	-0.3434	-0.721923	-0.358853	0.0053224	-0.871556	-0.324161	-0.372518	-0.318295	-0.106946	-0.876902	-0.686126		-0.399373	0.114323		-0.447491	0.114722		-0.421581	0.078088
P62736	ACTA2	-0.789539	-0.873039	-0.678288	-0.806045	-1.07238	-0.883612	-1.02899	-0.64168	-0.888876	-1.16185	-0.759005	-1.2721	-1.28494		-0.875985	0.0519837		-1.00141	0.112581		-0.933872	0.0590822
P60709	ACTB	-0.172556	0.178395	-0.153742	-0.593665	-0.342866	-0.512853	0.115545	0.0738147	0.0285196	-0.0296025	0.282982	-0.501031	0.173705		-0.211677	0.11105		0.00473127	0.110798		-0.111796	0.0815532
P12814	ACTN1	-0.283003	-0.169845	-0.520015	-0.430756	-0.347198	-0.342994	-0.685632	-0.150911	-0.452936	-0.613545	-0.454541	-0.210188	-0.379509		-0.397063	0.0635408		-0.376938	0.069924		-0.387775	0.0451182
O43707	ACTN4	-0.383971	-0.0748661	-0.299545	-0.367583	-0.297104	-0.118709	-0.246117	-0.158148	-0.395416	-0.474647	-0.215053	-0.13251	-0.165836		-0.255414	0.0447656		-0.256935	0.0582721		-0.256116	0.0345338
Q9NZ32	ACTR10	0.0464795	-0.177865	-0.105581	-0.13955	-0.171097	-0.253866	-0.145946	-0.135873	0.184761	-0.0575053	-0.274589	-0.324638	-0.227281		-0.135346	0.0349181		-0.139188	0.0757433		-0.137119	0.0378398
P61163	ACTR1A	-0.0137252	-0.116254	0.217265	-0.786186	-0.402933	-0.457005	0.240931	-0.0134879	-0.0721527	-0.285616	0.0633229	-0.589668	-0.824429		-0.188273	0.143106		-0.287005	0.144238		-0.233841	0.0985717
P42025	ACTR1B	0.272684	0.293495	0.256619	0.296141	0.220557	0.356301	0.345098	0.238884	0.267641	0.31978	0.292696	0.176668	0.328136		0.291556	0.0180616		0.270634	0.0231339		0.2819	0.0141355
P61160	ACTR2	0.0283474	0.157416	-0.223419	-0.199567	0.010894	-0.118709	-0.442569	0.0352054	0.209881	-0.40722	-0.432253	-0.035172	-0.0606888		-0.112515	0.0750851		-0.115041	0.103839		-0.113681	0.0599295
P61158	ACTR3	0.287504	0.320007	-0.0182441	-0.0694	0.152341	-0.00247867	-0.0157332	0.276802	0.20621	-0.0498407	0.16687	-0.0298452	0.0107117		0.093428	0.0602716		0.0968178	0.056046		0.0949925	0.0397786
Q03154	ACY1	0.379984	0.301332	0.198922	0.759664	0.26934	0.448536	0.239659	0.33247	0.285616	-0.0540347	0.3177	0.455452	0.27065		0.371062	0.0722432		0.267975	0.0697109		0.323484	0.0505941
P55265	ADAR	-0.286308	-0.180275	0.0416297	-0.0525743	-0.181906	0.0743341	0.151594	-0.283355	-0.283649	0.257904	0.285561	0.0317104	-0.0272735		-0.0619294	0.0604975		-0.00318356	0.101734		-0.0348159	0.0552014
P35611	ADD1	-0.418995	-0.342146	-0.28924	-0.226936	-0.31144	-0.160556	0.0832876	-0.402864	-0.344847	-0.213989	-0.0418774	-0.294432	-0.206177		-0.238004	0.0619082		-0.250698	0.0519188		-0.243862	0.0394154
P35612	ADD2	0.0286735	0.0850325	0.203103	0.183627	-0.0479568	0.0573978	0.168685	0.0780373	0.0326232	0.158621	-0.167141	-0.154105	0.0184781		0.0969375	0.0349467		-0.005581	0.0529634		0.0496213	0.0329532
Q9UEY8	ADD3	-0.330094	-0.426496	-0.461278	-0.369353	-0.580428	-0.44053	-0.451743	-0.465283	-0.440566	-0.526675	-0.42462	-0.407352	-0.384546		-0.437132	0.0298831		-0.441507	0.0204256		-0.439151	0.0179179
P48960	ADGRE5	-0.0758286	-0.0614492	-0.0229092	0.0500158	0.0751606	-0.0151282	-0.151166	0.0131191	-0.134726	0.160604	-0.181502	-0.0321925	-0.0417385		-0.0287579	0.0290699		-0.0360726	0.0490003		-0.0321339	0.0262747
P00325	ADH1B	-0.0361901	-0.0947953	-0.189652	-0.0611484	-0.0883051	0.166689	-0.241135	0.0648663	-0.136422	-0.32695	0.388902	-0.360578	0.0695901		-0.0777909	0.0491286		-0.0500985	0.11558		-0.0650098	0.0568742
P11766	ADH5	0.869519	0.96795	0.919634	0.600704	0.915619	1.13844	1.27158	0.768939	0.855575	1.38753	1.36556	1.53122	1.12475		0.954779	0.0801301		1.17226	0.126197		1.05516	0.0759663
Q9BRR6	ADPGK	-0.170519	-0.0421087	-0.320755	0.318925	-0.208734	0.371861	-0.433346	-0.213177	-0.171102	-0.307775	0.247404	0.117597	0.108309		-0.0692395	0.116652		-0.0364572	0.0909651		-0.0541092	0.0726442
Q16186	ADRM1	0.144788	0.164101	0.0630133	-0.199567	0.183428	-0.409773	-0.134919	-0.0906884	0.15552	-0.0209215	-0.312996	-0.0946368	-0.12304		-0.0269898	0.0854057		-0.081127	0.062027		-0.0519762	0.0525774
P30566	ADSL	0.508285	0.718085	0.286976	1.21243	0.734063	1.24944	0.215283	0.591757	0.432953	0.809897	0.666244	0.902689	0.985699		0.703509	0.154932		0.73154	0.0842588		0.716446	0.0885672
Q8N142	ADSS1	0.461407	0.0750458	0.489032	-0.280788	0.336568	-0.414044	0.224412	0.254228	0.270549	0.70632	0.42216	-0.183196	-0.379509		0.127376	0.134343		0.181759	0.162717		0.152476	0.10006
Q96IZ2	ADTRP	1.28375	1.54319	0.974241	1.28064	1.47789	2.04077	1.17153	1.48219	1.28054	1.53104	1.75632	1.86527	1.78472		1.396	0.12894		1.61668	0.0909121		1.49785	0.0841075
Q8IUX7	AEBP1	-0.921428	-0.927691	-0.955881	-1.0963	-0.749949	-0.611443	-1.16367	-0.998517	-0.967565	-0.991671	-1.05401	-0.643625	-1.17967		-0.918052	0.0716978		-0.972509	0.0727528		-0.943186	0.0496316
P55196	AFDN	0.445252	0.548378	0.0448438	0.737767	0.574321	0.400565	0.08008	0.556244	0.636367	-0.0356577	0.209524	0.611524	1.33331		0.404458	0.0972091		0.551885	0.190066		0.472501	0.0997066
Q9Y4W6	AFG3L2	-0.204708	-0.462337	-0.13447	-0.148822	-0.571192	-0.0812709	-0.145946	-0.249864	-0.239695	-0.247721	-0.209993	-0.397072	-0.239351		-0.249821	0.0712446		-0.263949	0.0272569		-0.256342	0.0389046
P43652	AFM	0.824998	1.36441	0.555642	1.35675	0.969437	1.24348	0.680807	0.865551	1.26916	0.546788	0.80018	1.15949	1.41106		0.99936	0.124426		1.00871	0.132892		1.00367	0.086984
P35573	AGL	0.239512	-0.0217744	0.861759	0.27423	0.0987698	0.2729	0.844008	0.23519	0.429747	0.837732	0.527279	0.223171	0.328136		0.367058	0.131758		0.430209	0.0943069		0.396205	0.0804168
Q9UL18	AGO1	-0.458797	-0.318107	-0.444694	-0.0502849	-0.556644	-0.0982431	-0.379358	-0.313708	-0.375296	-0.361166	-0.440577	-0.474903	-0.445077		-0.329447	0.0716536		-0.401788	0.0250562		-0.362835	0.0401424
Q99943	AGPAT1	-0.373334	-0.0719336	-0.641719	-0.303733	-0.556119	0.13011	-0.0378031	-0.678411	-0.991427	-0.215398	0.0102085	-0.228124	-0.384546		-0.264933	0.10745		-0.414616	0.148115		-0.334018	0.0882682
Q9NRZ7	AGPAT3	-0.0963599	-0.259453	0.0879819	-0.0293283	-0.0631769	-0.0872273	0.407696	-0.0779177	-0.0807017	0.430082	0.176776	0.0980726	0.0136743		-0.00569536	0.0791007		0.093331	0.0788132		0.0400091	0.0555173
O00468	AGRN	-1.30827	-1.43975	-1.141	-1.42278	-1.3597	-1.32887	-1.1583	-1.48834	-1.23248	-1.16185	-1.2019	-1.30587	-1.31477		-1.30838	0.0447049		-1.2842	0.0474329		-1.29722	0.0313503
P01019	AGT	1.25034	1.38557	0.437631	1.12004	0.867935	1.45018	0.389233	1.08255	1.22686	0.237454	1.01843	0.731254	0.992495		0.985848	0.164298		0.881506	0.144699		0.93769	0.107329
P23526	AHCY	0.906839	0.614439	0.720289	0.52716	0.79226	0.793872	0.867012	0.780314	0.406471	0.581316	0.832376	0.604967	0.576381		0.745981	0.0513636		0.630304	0.0630836		0.692592	0.0418654
O43865	AHCYL1	-0.633043	-0.697854	-0.456967	-0.853229	-0.90889	-0.801896	-0.508786	-0.830537	-0.732986	-0.707898	-0.526475	-0.769059	-0.981507		-0.694381	0.0649894		-0.758077	0.0611225		-0.723779	0.044041
Q96HN2	AHCYL2	0.682994	0.850476	0.269392	0.703812	0.560225	0.98507	0.091561	0.803153	0.760074	0.32447	0.399895	0.352081	0.849058		0.591933	0.119286		0.581455	0.100711		0.587097	0.0760507
Q09666	AHNAK	-0.817408	-0.576511	-0.942311	-0.991046	-0.805841	-0.943024	-1.04377	-0.678411	-0.899601	-1.23348	-0.907998	-0.911309	-0.802528		-0.874273	0.0594218		-0.905554	0.0752366		-0.88871	0.0453814
O95433	AHSA1	0.572564	0.62452	0.355998	0.350799	0.437411	0.536524	0.431965	0.818764	0.616765	0.315166	0.677187	0.355291	0.467663		0.472826	0.040379		0.541806	0.0800632		0.504663	0.0420741
P02765	AHSG	1.05622	1.41281	0.509735	1.31485	0.964882	0.981114	0.518143	1.06284	1.37261	0.274727	0.596305	1.01813	1.23568		0.965392	0.132598		0.926716	0.168862		0.947541	0.101233
Q96BJ3	AIDA	0.325818	0.168536	-0.0538139	0.0709004	0.389329	0.0254653	-0.143058	0.300422	0.146674	-0.109251	-0.0932705	0.0864516	0.0958403		0.111882	0.0736063		0.0711444	0.0628999		0.0930802	0.047475
O95831	AIFM1	0.115058	0.21734	0.295338	0.285338	0.170484	0.406619	0.439148	0.131053	0.153186	0.408445	0.376386	0.21979	0.625468		0.275618	0.044885		0.319055	0.0770016		0.295666	0.0414936
Q12904	AIMP1	0.540181	0.208644	0.0313025	0.499063	0.310318	0.352398	0.133508	0.225005	0.260179	0.190388	0.078529	0.43637	0.423336		0.296488	0.0704311		0.268968	0.0566583		0.283786	0.0443684
Q9NZN9	AIPL1	0.543758	-0.202628	0.49102	0.437443	0.487611	0.114188	0.48939	0.188718	0.295664	0.673184	0.766161	0.071121	0.125899		0.337255	0.105029		0.353458	0.12035		0.344733	0.0758998
P00568	AK1	0.445048	0.70094	0.992083	0.557556	0.365739	1.08105	1.10766	0.593158	0.75836	1.07456	1.11422	0.854824	1.08762		0.75001	0.117129		0.91379	0.0869245		0.825601	0.0755131
P54819	AK2	0.553485	0.43218	0.29066	0.480538	0.588132	0.397136	0.326188	0.346655	0.355838	0.347195	0.337455	0.55796	0.33516		0.438331	0.0418613		0.380044	0.0357129		0.411429	0.0280611
Q9UIJ7	AK3	-0.343405	-0.308395	-0.741115	-0.477429	-0.31144	-0.184202	-0.391645	-0.353461	-0.383768	-0.53211	-0.317034	-0.171271	-0.406892		-0.393947	0.0669353		-0.360756	0.0482664		-0.378628	0.0409521
P27144	AK4	0.237434	0.232461	0.264649	0.320435	-0.00107482	0.451147	0.151594	0.149913	0.20795	0.34501	0.281151	0.0231583	0.372458		0.236664	0.0529102		0.22994	0.0534857		0.23356	0.0361218
Q02952	AKAP12	-0.348548	-0.314869	-0.178268	-0.496582	0.0159813	-0.697262	-0.340284	-0.44065	-0.197024	-0.115338	-0.444092	-0.274126	-0.394093		-0.337119	0.0853118		-0.310887	0.0559943		-0.325012	0.0507611
P14550	AKR1A1	0.658066	0.663235	0.496558	0.315362	0.864439	0.567938	0.584758	0.757105	0.646392	0.667771	0.605333	0.692159	0.62086		0.592908	0.0636069		0.664937	0.0224228		0.626152	0.0359639
P15121	AKR1B1	0.807612	1.00993	0.969694	0.482133	0.950442	0.704517	0.705421	0.908243	0.878342	0.902534	0.798556	0.961473	0.731155		0.80425	0.0714698		0.863384	0.0341943		0.831543	0.040896
P52895	AKR1C2	-0.0738653	-0.253301	0.652359	-0.0488195	0.236236	-0.248019	0.396521	-0.385074	0.336525	0.258511	0.198088	-0.115549	-0.225639		0.0944445	0.129989		0.0111438	0.119877		0.055998	0.0863513
P42330	AKR1C3	0.514251	0.64584	1.08687	0.654759	0.215212	0.254094	1.42622	0.354238	0.862263	1.00929	1.09985	0.430779	0.404372		0.68532	0.165392		0.693465	0.136753		0.689079	0.104702
O43488	AKR7A2	0.141417	0.258962	0.426304	0.183627	0.252671	0.266603	0.41817	0.13788	0.114352	0.408445	0.236084	0.295245	0.159678		0.27825	0.0409228		0.225281	0.0457562		0.253803	0.0301928
P31749	AKT1	0.149438	0.332514	0.0221308	-0.0131405	0.225521	0.825395	0.106677	0.260905	0.213761	0.392493	0.0998735	0.0159718	0.444488		0.235505	0.107884		0.237915	0.0673284		0.236618	0.0632886
P13716	ALAD	0.750349	0.534177	0.0727516	-0.152599	0.248737	-0.217378	0.523078	0.659552	0.505555	-0.328864	0.647018	-0.300662	-0.285616		0.251302	0.139524		0.149497	0.204553		0.204315	0.116199
P02768	ALB	3.04228	3.04228	2.05258	2.58807	3.04228	2.25014	2.0956	3.04228	3.04228	1.70775	2.37657	2.58769	3.04228		2.5876	0.17337		2.63314	0.218054		2.60862	0.13145
Q8IZ83	ALDH16A1	-0.301712	-0.283165	-0.22552	-0.0611484	-0.311817	-0.24811	-0.36128	-0.292929	-0.302984	-0.341996	-0.393062	-0.249396	-0.120338		-0.256108	0.03651		-0.283451	0.0381572		-0.268728	0.0255804
P54886	ALDH18A1	0.0400167	0.107577	-0.235201	0.143583	-0.223228	0.0369546	-0.333749	-0.131342	0.0231782	-0.126678	-0.176085	-0.00214084	-0.0639656		-0.0662922	0.0725278		-0.0795056	0.032151		-0.0723907	0.0402322
P00352	ALDH1A1	0.334025	0.84713	0.24432	0.0440025	0.460009	0.524463	0.379509	0.522786	0.907525	0.150563	0.769441	0.606201	0.361055		0.40478	0.0944407		0.552929	0.111815		0.473156	0.072527
O94788	ALDH1A2	0.111798	0.212103	-0.50599	-0.111873	0.275254	0.103354	-0.109126	0.673252	-0.0241269	-0.197523	0.349072	0.914031	0.414261		-0.0034973	0.10051		0.354828	0.169938		0.161884	0.104559
P47895	ALDH1A3	1.09824	0.810834	0.15565	0.96863	1.30157	1.13358	0.459746	0.622308	0.79393	0.33825	0.824516	1.11926	1.16639		0.846893	0.153988		0.810775	0.126609		0.830223	0.0974359
P30837	ALDH1B1	0.325605	0.149843	0.147769	0.687377	0.170163	0.202716	0.120856	0.206028	0.181858	-0.0245465	0.250875	0.214143	-0.11472		0.257761	0.0759642		0.118939	0.0614272		0.19369	0.0517529
O75891	ALDH1L1	0.272226	0.277671	-0.111807	0.299923	0.0573306	0.436854	0.165908	0.162072	0.52584	0.228709	0.666244	0.327177	0.178081		0.199729	0.0683259		0.348021	0.0838673		0.268171	0.0553619
Q3SY69	ALDH1L2	-0.389272	-0.309234	-0.466424	-0.124779	-0.305997	-0.823836	-0.665384	-0.240745	-0.356121	-0.949254	-0.296955	-0.638679	-0.775872		-0.440704	0.0894183		-0.542938	0.11765		-0.487889	0.0709293
P05091	ALDH2	-0.037769	0.140723	-0.162397	0.0691422	-0.0309315	0.0053224	0.0469329	-0.194304	-0.047916	0.0192709	0.174045	0.293028	0.0136743		0.00443188	0.0363296		0.0429664	0.069687		0.022217	0.0363317
P51648	ALDH3A2	0.0128924	0.0941976	0.399252	-0.0453067	0.28604	0.0716588	0.347282	0.104801	0.166821	0.488866	0.183448	0.043468	0.311878		0.166574	0.0661574		0.216547	0.0656398		0.189638	0.0453725
P30038	ALDH4A1	0.381513	0.639309	0.485376	0.00448194	0.758505	0.311553	0.179426	0.589186	0.586089	0.360222	0.520489	0.342764	0.539714		0.394309	0.0983325		0.489744	0.0450896		0.438356	0.0564169
P51649	ALDH5A1	0.770746	0.400876	0.63779	0.312339	0.648821	0.37921	0.841666	0.508002	0.446915	0.355882	0.776119	0.0860074	0.132687		0.570207	0.0781181		0.384269	0.104218		0.484389	0.066691
Q02252	ALDH6A1	0.404907	0.363252	-0.0819933	0.38134	0.170484	0.61421	0.386145	0.276802	-0.0125917	0.213468	0.502515	0.442606	0.619345		0.319764	0.0827691		0.340357	0.092969		0.329268	0.0592906
P49419	ALDH7A1	0.4139	0.272347	0.202334	-0.202034	0.35162	0.262519	-0.0337013	0.25591	0.304233	0.142707	0.289989	0.538473	-0.200929		0.180998	0.0833253		0.221731	0.0996403		0.199797	0.0617489
P49189	ALDH9A1	0.639066	0.7237	0.884767	0.76457	0.761858	0.678757	0.696741	0.715489	0.511161	0.731567	0.814476	0.698003	0.759691		0.735637	0.0300718		0.705064	0.0421956		0.721527	0.0246013
P04075	ALDOA	0.325818	0.626026	0.724237	0.237765	0.445657	0.385033	0.566789	0.417399	0.43794	0.711968	0.498469	0.440536	0.425887		0.473046	0.0656138		0.4887	0.046141		0.480271	0.0396684
P09972	ALDOC	0.174048	0.157416	1.2415	0.225244	-0.037769	0.370046	1.14298	0.0694699	0.388635	1.19621	0.89468	0.102662	0.288669		0.467639	0.192793		0.490054	0.186206		0.477984	0.129172
Q9BT22	ALG1	-0.288455	0.0592598	-0.294276	0.589828	-0.0332845	0.359992	0.062908	-0.0641047	-0.410952	-0.229039	-0.0418774	0.141027	0.0363796		0.0651389	0.122102		-0.0947612	0.080527		-0.00866116	0.0760951
Q9H553	ALG2	-0.0420133	-0.373368	-0.334056	-0.126246	-0.0441747	-0.180983	-0.225207	-0.148547	-0.35225	-0.242147	-0.236535	-0.088231	-0.162437		-0.189435	0.0495033		-0.205024	0.0377228		-0.19663	0.0306343
Q9Y673	ALG5	-0.33974	-0.397149	-0.621322	-0.130309	-0.238684	-0.222336	-0.511176	-0.350554	-0.568723	-0.559194	-0.382214	-0.201067	-0.075562		-0.351531	0.0652575		-0.356219	0.0795623		-0.353695	0.0486243
P20292	ALOX5AP	0.300158	0.398808	0.00256277	0.613159	0.396114	0.664837	-0.409899	0.244921	0.308194	-0.0327895	0.0470198	0.335347	0.316675		0.28082	0.141424		0.203228	0.06408		0.245008	0.0793671
P05186	ALPL	-1.28367	-1.0014	-1.24789	-1.82767	-1.33318	-1.08311	-1.27149	-1.03718	-1.24333	-1.26035	-1.2019	-1.38404	-1.03797		-1.29263	0.0998992		-1.19413	0.0553624		-1.24717	0.0589682
Q86V81	ALYREF	-0.945815	-0.984249	-0.240749	-0.240193	-1.37804	-0.299398	-0.188762	-0.820172	-0.937358	-0.414831	-0.307674	-0.506937	-0.45236		-0.611029	0.181903		-0.573222	0.101355		-0.59358	0.104468
P02760	AMBP	0.120225	0.460202	-0.291014	-0.507632	0.203771	-0.889739	-1.07881	0.0753221	0.494609	-1.0514	-0.937219	-0.887168	-0.732408		-0.283285	0.218428		-0.506377	0.25943		-0.386251	0.163765
Q01433	AMPD2	-0.0648703	0.0092648	0.0725199	-0.207302	0.0680656	0.00190082	0.0185326	-0.0176684	-0.0878497	0.0614676	-0.109337	-0.0973316	-0.156099		-0.0145555	0.0365227		-0.0678029	0.031633		-0.0391312	0.0247038
P49418	AMPH	0.208757	0.0554309	0.90697	0.116043	0.176715	-0.202787	0.82357	0.0393545	0.171144	0.80165	0.577614	0.0468533	0.0799151		0.297814	0.155263		0.286088	0.13224		0.292402	0.0992777
O43827	ANGPTL7	-1.41902	-1.72742	-1.44861	-1.22173	-1.55245	-1.33848	-1.46688	-1.24979	-1.49634	-1.4145	-1.53682	-1.40924	-1.34412		-1.45351	0.0603879		-1.40847	0.0422506		-1.43272	0.0369746
P16157	ANK1	-0.348548	-0.353598	-0.777409	-0.526074	-0.158577	0.0303364	-0.807943	-0.299285	-0.326475	-0.711783	-0.725542	-0.589668	-0.28306		-0.420259	0.116512		-0.489302	0.0857391		-0.452125	0.0718835
Q01484	ANK2	0.206948	-0.122606	-0.0252922	-0.468182	0.0778458	-0.468105	-0.228116	-0.105464	0.00485639	-0.356425	-0.379318	-0.621669	-0.44855		-0.146787	0.0980875		-0.317762	0.0937909		-0.225698	0.0699099
Q12955	ANK3	0.194465	0.26291	-0.0976846	0.141812	0.00158285	0.197708	-0.156412	0.173827	0.223516	-0.0575053	0.0753629	-0.0423008	0.157756		0.0777689	0.0612977		0.0884426	0.0479254		0.0826952	0.0381533
Q9P2R3	ANKFY1	0.0837561	0.836199	0.333228	0.162498	0.127386	0.271497	0.0861805	0.198294	0.371802	0.250451	0.223051	0.550584	0.350416		0.271535	0.100586		0.3241	0.0534556		0.295796	0.0577122
Q92625	ANKS1A	-0.415527	-0.400167	-0.277796	-0.385506	-0.537254	-0.345872	-0.381599	-0.427761	-0.454281	-0.496959	-0.479012	-0.522204	-0.489387		-0.39196	0.0296967		-0.478268	0.0135773		-0.431794	0.0206677
P39687	ANP32A	0.526233	0.689714	0.901395	0.35281	0.720813	0.410641	1.08701	0.704691	0.596233	1.22816	0.849604	0.670952	1.38753		0.669802	0.0998753		0.906194	0.132986		0.778906	0.0851113
Q92688	ANP32B	0.8484	0.806127	0.8152	0.234735	1.33109	0.398335	0.627236	0.963045	0.787701	0.985699	0.338623	0.564774	1.25533		0.723018	0.133977		0.815862	0.133571		0.765869	0.0918812
Q9BTT0	ANP32E	1.038	0.551546	1.34083	0.550238	0.837088	0.421549	1.33264	0.759225	0.899824	1.36524	0.995162	0.835105	0.59239		0.867413	0.143903		0.907824	0.10705		0.886064	0.0883904
P15144	ANPEP	-0.101369	-0.366466	-0.566148	0.42345	-0.133507	0.118951	-0.64943	-0.214999	-0.236164	-0.318295	-0.22237	0.430779	0.0221387		-0.182074	0.1436		-0.0898185	0.114078		-0.139495	0.0907235
P04083	ANXA1	-0.622593	-0.249867	-0.700585	-1.08232	-0.496479	-0.839858	-0.740361	-0.486992	-0.503929	-1.0334	-0.589878	-0.538381	-0.913836		-0.67601	0.0992071		-0.677736	0.0959118		-0.676807	0.0664748
P50995	ANXA11	-0.460364	-0.582592	-0.787646	-0.698095	-0.511897	-0.78453	-0.794694	-0.628697	-0.646533	-0.837734	-0.871692	-0.528591	-0.661103		-0.659974	0.0532683		-0.695725	0.0539061		-0.676474	0.0367319
P07355	ANXA2	-1.08393	-0.944422	-1.31687	-0.993677	-1.29198	-0.943024	-0.969047	-1.19873	-1.08428	-1.14326	-0.749945	-0.919771	-0.84498		-1.07756	0.0613189		-0.990162	0.072924		-1.03722	0.0468315
P12429	ANXA3	-0.3124	-0.385336	-0.374542	-0.358425	0.124685	-0.224111	-0.525102	-0.256011	-0.0627718	-0.209964	-0.0638514	0.0550459	0.170685		-0.293604	0.0775989		-0.0611445	0.0651601		-0.186315	0.0596391
P09525	ANXA4	-0.492637	-0.481804	-0.439819	-0.420883	-0.400663	-0.219297	-0.221195	-0.430076	-0.376747	-0.225102	-0.27232	0.028736	-0.075562		-0.382328	0.0435711		-0.225179	0.0716557		-0.309798	0.0448329
P08758	ANXA5	0.252701	0.446478	0.212666	0.0231444	0.469532	0.458264	0.642762	0.402689	0.252624	0.510243	0.600349	0.733768	0.416195		0.357935	0.0780336		0.485978	0.0686368		0.417032	0.0537114
P08133	ANXA6	-0.665927	-0.593121	-0.492258	-0.863425	-0.564614	-0.611443	-0.49701	-0.614383	-0.763747	-0.529554	-0.728673	-0.426346	-0.59206		-0.612542	0.0478797		-0.609127	0.0510746		-0.610966	0.033453
P20073	ANXA7	-0.456824	-0.475419	-0.557693	-0.596907	-0.671667	-0.674782	-0.671928	-0.617748	-0.503929	-0.681699	-0.689572	-0.636195	-0.547584		-0.58646	0.0353344		-0.612788	0.0301767		-0.598611	0.0229263
Q16853	AOC3	-0.77724	-1.09724	-0.733515	-0.625481	-0.832281	-0.764378	-0.854702	-0.913632	-0.780998	-0.674533	-0.860181	-0.721383	-0.582969		-0.81212	0.0552102		-0.755616	0.0496992		-0.786041	0.0369023
Q06278	AOX1	-0.218629	-0.344357	-0.229295	-0.456304	-0.308058	-0.419013	-0.383038	-0.251528	-0.29458	-0.23102	-0.585448	-0.705063	-0.923029		-0.336956	0.034359		-0.498444	0.116129		-0.411489	0.0587483
Q10567	AP1B1	0.261679	0.190852	0.115708	0.804519	0.166992	0.432688	0.225734	0.204875	0.11979	0.290702	0.339525	0.684456	0.675564		0.314024	0.0901481		0.385819	0.0979522		0.34716	0.0643415
O43747	AP1G1	0.687259	0.834342	0.27254	0.411963	0.642615	-0.155427	0.124628	0.704721	0.821377	0.0884426	-0.333879	0.0906596	-0.0986688		0.40256	0.131901		0.212109	0.186065		0.314659	0.109968
Q9BXS5	AP1M1	0.408205	0.146656	-0.0852296	-0.079295	0.338531	0.139451	-0.288351	0.272536	0.142175	-0.150267	-0.346436	0.0860074	-0.0540347		0.0828525	0.093965		-0.00833664	0.0907354		0.0407652	0.0642854
O95782	AP2A1	-0.567681	-0.608358	-0.398569	-0.317195	-0.658301	-0.407115	-0.331361	-0.548487	-0.527445	-0.353655	-0.421305	-0.432025	-0.331576		-0.469797	0.0525014		-0.435749	0.0360242		-0.454083	0.0318697
O94973	AP2A2	-0.184815	-0.273612	-0.134544	-0.268054	-0.0725457	-0.24811	-0.121686	-0.141792	-0.183309	-0.0695342	-0.231374	-0.33112	-0.291623		-0.186195	0.0300489		-0.208125	0.0395236		-0.196317	0.0235258
P63010	AP2B1	-0.301123	-0.180275	-0.27498	-0.292589	-0.371737	-0.505807	-0.268957	-0.291694	-0.258047	-0.418933	-0.342802	-0.463069	-0.346144		-0.313638	0.0384772		-0.353448	0.0312978		-0.332012	0.0248956
Q96CW1	AP2M1	-0.804209	-0.706345	-0.27498	-0.276357	-0.836151	-0.487651	-0.327594	-0.85582	-0.789648	-0.341996	-0.500965	-0.402814	-0.62614		-0.530469	0.0941309		-0.586231	0.0848944		-0.556205	0.0619348
P53680	AP2S1	-0.841717	-0.787416	-0.529082	-0.729416	-0.805841	-0.833777	-0.43841	-0.909101	-0.732986	-0.582969	-0.632396	-0.697659	-0.84498		-0.70938	0.0606936		-0.733349	0.0508035		-0.720442	0.03873
O00203	AP3B1	0.822057	0.441156	-0.221739	0.0892045	0.355768	0.0595251	-0.298181	0.585643	0.122478	-0.422405	-0.283005	0.119599	0.0624408		0.178256	0.148334		0.030792	0.1448		0.110196	0.102011
O14617	AP3D1	0.0303606	-0.0469597	-0.0976846	-0.223704	0.132436	-0.296496	-0.208451	-0.0125532	-0.0995564	-0.177163	-0.296955	-0.062627	-4.23846e-05		-0.1015	0.0576314		-0.108149	0.0459645		-0.104569	0.0360753
Q9Y2T2	AP3M1	0.036817	0.079539	-0.1512	0.362324	0.00890942	0.245202	-0.373422	0.146266	0.0284324	0.185572	-0.312996	-0.035172	0.779853		0.0297384	0.091973		0.131993	0.148266		0.0769327	0.0819843
P53677	AP3M2	-0.072329	0.026564	-0.13319	0.291929	-0.138458	0.206325	-0.221195	-0.0204946	0.0769313	-0.146927	-0.262471	-0.0846187	-0.126489		-0.00576495	0.0722651		-0.0940114	0.0472397		-0.0464941	0.0446813
P02743	APCS	-1.79251	-1.81222	-2.06909	-1.85559	-1.72863	-1.92849	-2.11997	-1.98311	-1.7264	-2.05576	-1.90353	-1.8019	-1.80175		-1.90093	0.0552876		-1.87874	0.0509515		-1.89069	0.036502
P13798	APEH	0.48249	0.437562	0.41845	0.473846	0.450737	0.80215	0.495304	0.43469	0.478837	0.683609	0.39263	0.718216	0.699439		0.508648	0.0499428		0.567904	0.0604656		0.535997	0.038044
P27695	APEX1	0.70029	1.28819	1.60976	0.831191	0.722063	0.737309	1.40518	1.00314	1.33858	1.05735	1.29077	0.703874	0.841471		1.042	0.144029		1.0392	0.101009		1.0407	0.086875
Q9BZZ5	API5	-0.166547	0.000460123	0.386101	0.223338	-0.0098649	0.114188	0.279617	0.0334891	-0.0337576	0.250451	0.0529536	0.261735	0.20149		0.118185	0.0724143		0.127727	0.0513191		0.122589	0.0438196
Q9HDC9	APMAP	-0.431031	-0.600965	-0.550813	-0.579523	-0.406643	-0.645148	-0.594433	-0.508165	-0.443997	-0.597781	-0.571387	-0.694995	-0.49976		-0.54408	0.0341414		-0.552681	0.0361624		-0.548049	0.0238084
P02647	APOA1	0.756567	1.66286	0.848665	0.962218	1.31289	1.94051	0.525567	1.38537	1.54294	0.663116	1.46636	1.31434	1.70775		1.14418	0.194263		1.34665	0.147537		1.23763	0.123269
P02652	APOA2	1.14644	2.13889	1.36552	1.5477	1.34063	1.987	0.994203	1.28113	1.50369	0.955125	1.94131	1.40614	1.94091		1.50291	0.159753		1.50472	0.157336		1.50375	0.10785
P06727	APOA4	0.648821	0.929192	0.22926	0.377164	0.319088	0.522987	-0.260292	0.942711	1.07191	-0.273678	0.385681	0.202958	0.635561		0.395174	0.140503		0.49419	0.203398		0.440874	0.116077
P04114	APOB	0.264224	0.267681	-0.195434	0.181346	0.691161	1.0954	-0.365806	0.397104	0.535379	-0.118669	-0.032411	0.384445	0.52587		0.276939	0.188168		0.281953	0.116448		0.279253	0.110186
P02654	APOC1	0.0263502	0.470788	0.177616	0.449222	0.270221	1.03367	-0.421489	-0.0250308	0.459788	-0.144928	0.250875	0.380507	0.463059		0.286625	0.169013		0.230712	0.105801		0.260819	0.0995395
P02656	APOC3	-0.256186	0.949002	0.564367	0.644071	-0.113563	1.5305	0.00353773	0.0759865	0.471628	0.158621	1.11965	0.442606	0.907062		0.474533	0.242931		0.529259	0.167825		0.499791	0.146175
P05090	APOD	0.465071	0.7049	0.499092	0.833179	0.244903	0.436203	-0.083886	0.440243	0.837395	-0.511621	-0.0619214	0.155357	0.264599		0.44278	0.113532		0.187342	0.186565		0.324886	0.107309
P02649	APOE	-0.52604	-0.833906	-0.700585	-0.345161	-0.887497	-0.85605	-1.3875	-0.500643	-0.242351	-1.19465	-1.07989	-1.41705	-1.07029		-0.790962	0.124245		-0.91748	0.183091		-0.849355	0.104567
P02749	APOH	-0.0393381	0.734063	-0.153742	0.219961	-0.0613396	-0.195539	-0.677359	0.184359	0.566672	-0.622677	-0.366269	-0.333847	0.105566		-0.0247563	0.162491		-0.0776993	0.179198		-0.0491915	0.115508
O14791	APOL1	0.529257	0.604424	0.126913	0.486883	0.583694	0.776784	-0.159432	0.50154	0.449195	-0.0498407	0.0547547	0.591926	0.457942		0.421218	0.122099		0.334253	0.107787		0.38108	0.0800287
Q9BQE5	APOL2	0.389835	0.0790171	-0.279999	0.748999	0.166992	0.282831	-0.233649	0.391221	0.382344	-0.310489	-0.0619214	0.400541	0.274727		0.164861	0.135386		0.179404	0.121418		0.171573	0.0881718
Q9BUR5	APOO	0.48249	0.250784	0.170776	0.720022	0.396804	0.440011	0.27175	0.320224	0.301819	0.48658	0.418088	0.591926	0.430482		0.390377	0.0692543		0.424853	0.0439263		0.406289	0.0410725
P05067	APP	-0.222634	-0.249867	-0.568518	-0.183179	-0.384711	0.16112	-0.398884	-0.43289	-0.025841	-0.350921	-0.299232	-0.190257	-0.0986688		-0.26381	0.0865565		-0.232968	0.0635177		-0.249576	0.0530344
Q9UKG1	APPL1	0.275851	-0.0719336	-0.100058	-0.710994	0.473047	-0.554799	-0.612381	0.289358	0.292914	-0.572123	-0.521526	-0.556884	-0.728884		-0.185895	0.173307		-0.299524	0.189028		-0.238339	0.123391
Q8NEU8	APPL2	-0.0871785	-0.0468291	0.102518	0.302709	0.00529544	0.0470998	-0.0505426	-0.00793837	-0.00798019	0.3129	0.078529	0.220816	0.234583		0.0390103	0.0502575		0.138485	0.0556538		0.0849216	0.0384785
P07741	APRT	0.596481	0.434356	0.313202	0.155665	0.270221	0.554448	0.36488	0.409649	0.422305	0.33224	0.549871	0.303041	0.162562		0.384179	0.0592004		0.363278	0.0533324		0.374532	0.0387247
P29972	AQP1	0.0277512	0.201164	-0.131611	0.223338	-0.0464815	0.216526	-0.227002	0.172532	0.036022	-0.154406	-0.133577	0.432616	0.0777187		0.0376693	0.0688475		0.0718176	0.088506		0.0534301	0.0529783
P55087	AQP4	0.168704	0.0430472	1.20973	0.508752	0.22792	0.236076	1.08473	0.0920953	0.300467	1.18372	0.711845	0.171969	0.385946		0.496994	0.176466		0.47434	0.166854		0.486538	0.117254
P10398	ARAF	-0.0627592	-0.166294	-0.546222	-0.240193	0.0723472	0.0696843	-0.521125	-0.102879	0.0340164	-0.545022	-0.35668	-0.426346	-0.426521		-0.199223	0.0965446		-0.303905	0.0904713		-0.247538	0.0656541
Q96P48	ARAP1	0.437041	0.401486	0.0769015	0.679253	0.447527	0.456731	0.20593	0.508464	0.347786	0.476816	0.520489	0.696425	0.692051		0.38641	0.0732895		0.540338	0.0547422		0.457454	0.0501311
P48444	ARCN1	-0.0105773	0.135925	-0.116718	-0.0204043	0.117654	-0.0268434	0.000818321	0.116584	-0.00951159	-0.040929	-0.0141601	0.104373	0.0107117		0.0114077	0.0331948		0.0278448	0.0270276		0.0189941	0.0210413
P18085	ARF4	0.835066	0.81635	0.389081	0.842736	0.654883	0.913438	0.570032	1.00956	0.569006	0.798998	0.554466	1.17253	0.92926		0.71737	0.0709116		0.838971	0.100654		0.773493	0.0600698
P62330	ARF6	-0.374817	-0.242968	-0.380878	0.347399	-0.335395	0.354567	-0.175598	-0.419829	-0.322091	0.0096284	0.118352	-0.0606705	0.156255		-0.115384	0.123551		-0.0863925	0.0961619		-0.102003	0.076847
Q9Y6D6	ARFGEF1	-0.129581	-0.0988542	0.312831	0.10866	-0.252668	0.0850861	0.37428	-0.029925	0.00633887	0.222532	0.129821	-0.233644	-0.264708		0.0571078	0.0879084		-0.0282642	0.0789887		0.0177053	0.0585779
Q9Y6D5	ARFGEF2	0.208406	0.192217	-0.256296	0.208298	0.10023	0.176169	-0.451743	0.254911	0.0198935	-0.312778	-0.156185	0.157121	0.181146		0.0253259	0.101198		0.0240182	0.0897476		0.0247223	0.0656215
P53367	ARFIP1	-0.390476	-0.232421	0.218783	-0.514643	-0.282475	-0.290231	0.263118	-0.390091	-0.199632	0.267633	0.0899239	-0.0741033	-0.161651		-0.175478	0.113066		-0.0779869	0.0943166		-0.130482	0.0731393
Q07960	ARHGAP1	1.28237	0.856746	0.276787	0.583489	0.695274	0.965811	0.454598	1.21941	0.966774	0.194907	0.570427	0.724811	0.451249		0.730725	0.127308		0.68793	0.149942		0.710974	0.0934078
Q68EM7	ARHGAP17	0.141394	-0.269176	-0.610691	-0.154354	0.113425	-0.17623	-0.45043	0.182775	-0.165921	-0.407962	-0.330231	-0.0994207	-0.107747		-0.200866	0.103923		-0.154751	0.0845041		-0.179582	0.0657645
Q8N392	ARHGAP18	-0.0303839	-0.0880911	-0.25884	-0.0590116	-0.0497891	-0.0888382	-0.327594	-0.0971465	-0.0733262	-0.218178	-0.217022	-0.0666429	0.125899		-0.128935	0.0437749		-0.0910694	0.0516541		-0.111459	0.0325378
P98171	ARHGAP4	-0.337905	-0.290393	-0.581344	-0.465335	-0.331855	-0.79076	-0.911637	-0.164625	-0.316826	-0.85347	-0.796348	-0.466409	-0.550163		-0.52989	0.0918116		-0.52464	0.109361		-0.527467	0.0676016
P52565	ARHGDIA	0.338217	0.524378	0.298745	0.210014	0.756567	0.506983	0.360362	0.453582	0.440665	0.142707	0.464366	0.815089	0.743079		0.427895	0.0690658		0.509915	0.0987221		0.46575	0.0574266
P52566	ARHGDIB	0.487008	0.668505	0.0582095	0.538129	0.923934	0.79578	0.358056	0.684416	0.679461	0.612128	0.698229	0.892162	1.14759		0.547089	0.108784		0.785664	0.0819798		0.6572	0.075215
Q9NZN5	ARHGEF12	-0.127112	-0.254003	-0.230556	0.0408948	-0.127019	-0.380765	-0.333749	-0.213593	-0.225611	-0.281533	-0.319302	0.0413321	-0.20478		-0.201759	0.05413		-0.200581	0.0516344		-0.201215	0.0360777
P40616	ARL1	-0.112998	-0.122606	-0.125433	-0.181106	-0.0149569	-0.169056	0.0928928	-0.0992465	-0.174518	0.0884426	0.0309647	-0.0298452	0.0386811		-0.0904663	0.0366702		-0.0242535	0.039977		-0.0599065	0.0275712
P36405	ARL3	0.115058	0.0214724	0.659029	0.249125	-0.00227604	0.165794	0.809234	0.0450215	0.137593	0.649437	0.681673	0.181643	0.0748571		0.288205	0.120613		0.295037	0.118845		0.291359	0.081448
O75915	ARL6IP5	-0.573561	-0.918557	-0.406878	-0.373383	-0.489779	-0.396209	-0.407141	-0.54241	-0.906549	-0.563828	-0.417372	-0.10209	-0.271904		-0.509359	0.0730609		-0.467359	0.112835		-0.489974	0.0626263
Q9NVJ2	ARL8B	-0.207486	-0.226581	-0.320155	-0.361295	-0.117592	-0.357528	-0.440548	-0.189743	-0.282089	-0.334457	-0.370147	-0.114951	-0.0731645		-0.290169	0.0419103		-0.227425	0.0492206		-0.26121	0.0319425
Q5T2E6	ARMH3	-0.476128	-0.330262	-0.461076	-0.130309	-0.556644	-0.128821	-0.3323	-0.333857	-0.331546	-0.297733	-0.503609	-0.522204	-0.438863		-0.345077	0.0633707		-0.404635	0.0393994		-0.372565	0.0381205
Q9H993	ARMT1	0.345359	0.580351	0.877524	0.256148	0.382664	0.427858	0.844792	0.542436	0.386685	0.81604	0.739957	0.384711	0.519469		0.530671	0.0930472		0.564883	0.0731468		0.546461	0.0581731
O15144	ARPC2	0.430733	0.571856	0.123226	0.160827	0.484732	0.472334	0.334822	0.41563	0.754115	0.262496	0.194133	0.205993	0.282145		0.368361	0.0643538		0.352419	0.0865785		0.361003	0.0506139
O15145	ARPC3	0.873493	0.418317	0.00447178	1.0549	0.592499	0.319084	0.288078	0.578441	0.638374	0.193029	0.424485	0.35862	0.193029		0.507263	0.136753		0.397663	0.0767282		0.456678	0.0800994
P59998	ARPC4	-0.0942472	-0.0692042	-0.284136	-0.369353	-0.00710381	-0.287205	-0.349965	-0.15953	-0.129072	-0.440556	-0.223411	-0.151491	-0.136782		-0.208745	0.0558097		-0.206807	0.0487016		-0.20785	0.0359831
O15511	ARPC5	-0.265571	-0.395538	-0.587336	-0.540513	-0.209961	-0.296496	-0.658644	-0.34745	-0.350971	-0.433396	-0.599801	-0.035172	-0.15394		-0.422008	0.0660562		-0.320122	0.081968		-0.374984	0.0517863
Q9BPX5	ARPC5L	-0.190341	-0.137614	-0.22935	-0.246278	-0.0756535	-0.0851184	-0.145946	-0.133568	-0.165921	-0.0371102	-0.140117	0.0201385	-0.156099		-0.158614	0.025157		-0.102113	0.0308709		-0.132537	0.0204885
P36575	ARR3	-0.0338631	-0.568449	0.788969	0.230342	-0.452662	0.121428	0.700009	-0.348204	-0.0909173	0.681941	0.539733	0.0518419	0.303217		0.112254	0.196473		0.189602	0.159667		0.147953	0.124174
P49407	ARRB1	-0.423771	-0.822042	0.999886	-0.411451	-1.34448	-0.538295	1.02278	-0.703901	-0.120099	1.01798	0.63332	-0.738835	-0.420795		-0.216769	0.339431		-0.0553881	0.297311		-0.142285	0.220357
O00192	ARVCF	-0.132794	-0.0686887	0.0378801	0.156951	-0.0560439	0.152367	0.164115	-0.0776017	-0.0947792	0.285904	0.282982	0.107746	0.0809431		0.0362553	0.0469321		0.0975324	0.0678013		0.064537	0.0394312
Q13510	ASAH1	0.691161	0.256249	0.0547466	0.640117	0.456532	0.519085	0.380904	0.967716	0.327983	0.369246	0.602414	0.491149	0.651582		0.428399	0.0837217		0.568348	0.0950368		0.492991	0.0634797
O43150	ASAP2	-0.654926	-0.568449	-0.123796	-0.443199	-0.709738	-0.477161	-0.105079	-0.508165	-0.437943	-0.138563	-0.265263	-0.358454	-0.374191		-0.440335	0.0911563		-0.347097	0.0533048		-0.397302	0.0544392
Q9H1I8	ASCC2	-0.0728364	-0.106228	-0.216284	-0.246278	-0.216226	0.0444736	-0.230857	-0.143074	-0.165741	-0.337014	-0.146787	-0.327373	-0.274621		-0.149177	0.0409041		-0.232435	0.0371927		-0.187604	0.0293265
Q8N3C0	ASCC3	-0.222862	-0.183385	0.0810593	-0.17485	-0.169062	-0.487651	-0.149539	-0.168195	-0.203064	-0.237201	-0.262471	-0.233644	-0.319715		-0.186613	0.0627575		-0.237382	0.0211241		-0.210045	0.0346347
P04424	ASL	-0.153129	-0.199552	-0.337996	-0.429577	-0.0828272	-0.0174346	-0.514383	-0.130106	-0.20732	-0.307775	-0.0838834	-0.229837	-0.151849		-0.247842	0.0696623		-0.185128	0.0326185		-0.218897	0.0399074
O95671	ASMTL	0.475861	0.711522	0.702555	0.634303	0.613082	0.906067	0.81054	0.697378	0.552259	0.731567	0.779236	0.625538	1.08294		0.693418	0.0526959		0.74482	0.0751096		0.717142	0.0434422
Q12797	ASPH	-0.17954	-0.465423	-0.439819	-0.764719	-0.521477	-0.772863	-0.503927	-0.472271	-0.536151	-0.496959	-0.559891	-0.561221	-0.639199		-0.52111	0.0770589		-0.544282	0.0238265		-0.531805	0.0414609
Q9BXN1	ASPN	-1.37804	-1.52163	-1.60692	-0.896546	-1.48086	-1.09105	-1.24424	-1.48834	-1.26238	-1.31477	-1.15351	-1.22232	-1.01855		-1.31704	0.0963169		-1.24331	0.0644294		-1.28301	0.0583825
P00966	ASS1	-0.396394	-0.346136	-0.126211	-0.786186	-0.394974	-0.656217	-0.142844	-0.251351	-0.344394	-0.259766	-0.158937	-0.296901	-0.32951		-0.406995	0.0923856		-0.273477	0.0273949		-0.345371	0.0530229
Q9NVI7	ATAD3A	-0.206835	-0.0445752	-0.393651	-0.473989	-0.11151	-0.449762	-0.680336	-0.236391	0.0264587	-0.622677	-0.722974	-0.589668	-0.688233		-0.337237	0.0853384		-0.472247	0.122511		-0.399549	0.0722809
O95352	ATG7	-0.241868	-0.182182	0.0266794	-0.0358628	-0.159332	0.316826	0.249824	-0.253845	-0.248451	0.225886	0.390694	-0.158365	-0.132235		-0.00370225	0.0819073		-0.0293859	0.110637		-0.0155563	0.0646052
P31939	ATIC	0.503313	0.388405	0.125017	0.696384	0.434194	0.644499	0.440615	0.340944	0.289628	0.443991	0.500569	0.756936	0.62086		0.461775	0.0707363		0.492154	0.0714018		0.475796	0.0484424
Q6DD88	ATL3	-0.549951	-0.412431	-0.651548	-0.755533	-0.336411	-0.670163	-0.771478	-0.451826	-0.509385	-0.611003	-0.71642	-0.613766	-0.338268		-0.592502	0.0632358		-0.540111	0.05508		-0.568322	0.041435
O00244	ATOX1	1.08149	0.903369	0.823059	0.713965	0.945403	0.85303	0.807803	1.02035	0.905341	0.783231	0.907952	1.02637	0.805234		0.875446	0.0441931		0.90808	0.0419405		0.890508	0.0297682
Q9HD20	ATP13A1	-0.153565	-0.0611405	-0.392974	-0.121732	-0.119044	-0.0696097	-0.500769	0.00573336	-0.376747	-0.58065	-0.541554	0.0447006	-0.100354		-0.202691	0.0652412		-0.258145	0.113232		-0.228285	0.0606242
P05023	ATP1A1	-0.402609	-0.265544	-0.302753	-0.50354	-0.500047	-0.386399	-0.23561	-0.386916	-0.523301	-0.478403	-0.376965	-0.411489	-0.457055		-0.370929	0.0406979		-0.439022	0.0233118		-0.402356	0.0254257
P50993	ATP1A2	-0.887497	-0.717737	-0.351504	-0.829289	-0.456824	-0.678188	-0.418337	-0.720233	-0.443997	-0.303459	-0.589878	-0.60914	-0.681699		-0.619911	0.079833		-0.558068	0.0640418		-0.591368	0.0508313
P13637	ATP1A3	-0.0256688	-0.116254	0.809148	0.387689	-0.0779808	0.128814	1.03646	-0.0337112	0.0620946	0.913883	0.593492	0.0654455	0.182778		0.30603	0.173242		0.29733	0.152716		0.302015	0.112103
P05026	ATP1B1	-0.314514	-0.0971962	-0.105581	-0.417317	-0.213501	-0.481124	-0.0204556	-0.258412	-0.274344	-0.150267	-0.307674	-0.310622	-0.254262		-0.23567	0.0658943		-0.259263	0.0238849		-0.246559	0.0359201
P14415	ATP1B2	-0.190341	-0.777178	1.11898	0.399372	-0.193887	0.111931	1.41527	-0.218949	0.00930407	1.56246	0.868058	0.202958	0.41742		0.269163	0.292681		0.473542	0.265381		0.363492	0.193576
P16615	ATP2A2	-0.665927	-0.683663	-0.562799	-1.01614	-0.456824	-0.956365	-0.882668	-0.732701	-0.712948	-0.793341	-1.0303	-0.685353	-0.725842		-0.746341	0.0791908		-0.78008	0.0521058		-0.761913	0.0472662
P23634	ATP2B4	-0.471754	-0.366466	0.347723	-0.235224	-0.571421	-0.328199	0.062908	-0.353461	-0.277637	-0.0575053	-0.264937	-0.578124	-0.361166		-0.223205	0.121747		-0.315472	0.0690529		-0.26579	0.0713018
P98194	ATP2C1	-0.414864	-0.19097	-0.503031	0.409901	-0.260193	0.192985	-0.19284	-0.409106	-0.2413	-0.152636	-0.0291399	0.251141	0.216554		-0.137002	0.12348		-0.0607478	0.106076		-0.101808	0.0799334
P25705	ATP5F1A	-0.121666	0.0249249	0.334231	-0.209798	-0.190742	-0.169056	0.345098	-0.12878	-0.197024	0.126451	0.215182	-0.224035	-0.132235		0.0018561	0.0919602		-0.0567401	0.0743991		-0.0251883	0.0584155
P06576	ATP5F1B	-0.10865	-0.0250136	0.24577	0.121321	-0.11559	-0.0136567	0.412501	-0.0418664	-0.144142	0.202299	0.281151	-0.0254071	-0.0808075		0.0738117	0.0745015		0.0318713	0.0691812		0.0544546	0.0495094
P36542	ATP5F1C	-0.495975	-0.331302	0.105976	-0.183179	-0.924843	-0.411745	0.160911	-0.574327	-0.61048	-0.014544	-0.0367942	-0.455663	-0.384546		-0.297165	0.140843		-0.346059	0.106625		-0.319732	0.0870432
P30049	ATP5F1D	0.737952	0.509334	0.792542	0.228537	0.564109	0.321597	0.976797	0.60743	0.626496	0.485008	0.905115	0.732053	0.350416		0.590124	0.100285		0.617753	0.07851		0.602876	0.0625207
P56385	ATP5ME	-0.227284	-0.249775	0.0292408	-0.316083	-0.308922	-0.365554	0.08008	-0.287417	-0.172409	0.0988221	-0.164416	-0.105099	-0.191329		-0.194043	0.0666757		-0.136975	0.0529818		-0.167704	0.0424756
P56134	ATP5MF	-0.291776	-0.683663	-0.319257	-0.654285	-0.531629	-0.78453	-0.441345	-0.609771	-0.367428	-0.392553	-0.605818	-0.82895	-0.70351		-0.529498	0.0711919		-0.584671	0.0727957		-0.554963	0.0494637
O75964	ATP5MG	-0.217473	-0.23345	0.131867	-0.231798	0.11087	-0.224111	0.0516574	-0.164625	-0.249787	0.0594148	-0.133577	-0.379133	-0.321522		-0.0874911	0.0662815		-0.198205	0.0638422		-0.13859	0.0471218
P24539	ATP5PB	-0.423771	-0.220172	0.13686	-0.17485	-0.575359	-0.222336	0.0773756	-0.368743	-0.359109	-0.0837556	-0.0497617	-0.30301	-0.249195		-0.200322	0.0954834		-0.235596	0.0563628		-0.216602	0.0555993
O75947	ATP5PD	0.160218	0.386998	0.526955	0.163723	0.474905	0.26464	0.732873	0.221119	0.362869	0.669723	0.50713	0.29024	0.383182		0.387187	0.0791619		0.405711	0.0657618		0.395736	0.0502586
P48047	ATP5PO	-0.412249	-0.308395	0.0566953	-0.167634	-0.447619	-0.301766	0.191577	-0.453247	-0.344847	-0.0796919	0.151739	-0.249396	-0.174972		-0.198484	0.0911209		-0.191736	0.0867881		-0.19537	0.0607031
Q15904	ATP6AP1	-0.724305	-0.633035	-0.593965	-0.287755	-0.681408	-0.391719	-0.183328	-0.764528	-0.655092	-0.338794	-0.252874	-0.246345	-0.206983		-0.499359	0.0797019		-0.410769	0.0972136		-0.458472	0.060747
Q93050	ATP6V0A1	-0.533226	-0.637473	-0.28924	-0.436178	-0.456824	-0.391313	-0.172831	-0.389818	-0.667296	-0.158415	-0.227474	-0.491949	-0.355317		-0.416727	0.0578733		-0.381712	0.0748608		-0.400566	0.0447755
P27449	ATP6V0C	-0.491189	-0.612254	-0.426511	-0.203602	-0.548654	-0.047715	-0.688135	-0.506679	-0.450424	0.111613	-0.0141601	-0.256604	-0.0380356		-0.431151	0.0866126		-0.192382	0.102874		-0.32095	0.0723575
P61421	ATP6V0D1	0.52806	0.00616701	0.805094	0.193539	0.159844	0.209797	0.588533	0.796235	0.745155	0.457424	0.612086	-0.00448637	0.324744		0.355862	0.108451		0.488526	0.12202		0.417092	0.0799645
P38606	ATP6V1A	0.26598	0.260703	0.576294	0.179736	0.15626	0.350594	0.758179	0.409649	0.171144	0.495292	0.663509	0.217511	0.34532		0.363964	0.0842351		0.383738	0.0743171		0.37309	0.0545945
P21281	ATP6V1B2	0.334025	0.338122	0.510819	0.344579	0.0232702	0.278092	0.635984	0.479359	0.251185	0.150563	0.663509	0.256864	0.28532		0.352127	0.0723691		0.3478	0.076896		0.35013	0.0504732
P21283	ATP6V1C1	0.479233	0.374308	0.580524	0.169508	0.374389	0.416549	0.797206	0.522786	0.323749	0.806227	0.689027	0.272013	0.443991		0.45596	0.0739104		0.509632	0.0847837		0.480732	0.05397
Q9Y5K8	ATP6V1D	0.205332	0.100339	0.296861	0.205697	0.239512	0.323471	0.577799	0.148775	0.124296	0.440945	0.424485	0.202958	0.0541831		0.27843	0.0568739		0.232607	0.0662559		0.257281	0.0419351
P36543	ATP6V1E1	0.310318	0.237113	0.517637	0.259404	0.400822	-0.00729809	0.257841	0.385301	0.20621	0.43146	0.119327	0.422508	0.350416		0.282262	0.0611881		0.319204	0.0520689		0.299312	0.0394669
Q16864	ATP6V1F	-0.227285	-0.163045	0.512161	0.685737	-0.734566	0.526141	0.565884	0.0393545	-0.12475	0.538813	0.510628	0.483922	0.510243		0.166433	0.20433		0.326368	0.118828		0.240249	0.120356
O75348	ATP6V1G1	0.52024	0.472502	0.363943	0.758132	0.494051	0.556579	0.669179	0.549652	0.434996	0.169566	0.86632	0.500667	0.678107		0.547804	0.0493218		0.533218	0.0957722		0.541072	0.0492266
Q9UI12	ATP6V1H	0.429123	0.287117	0.403276	0.446436	0.130097	0.195894	0.430867	0.33074	0.298655	0.0909937	0.301048	0.159017	0.263463		0.33183	0.0484737		0.240653	0.0386048		0.289748	0.0330361
Q9Y2Q0	ATP8A1	-0.252766	-0.328519	-0.419509	-0.496582	-0.364238	-0.047715	-0.335457	-0.281597	-0.236061	-0.444657	-0.307674	-0.771563	-0.181201		-0.320684	0.0538976		-0.370459	0.0879601		-0.343657	0.0481798
O43861	ATP9B	-0.333724	-0.643575	-0.610691	0.373817	-0.593751	-0.235696	-0.485932	-0.593768	-0.503929	-0.466662	-0.651182	-0.481722	-0.495403		-0.361365	0.135258		-0.532111	0.0299688		-0.440171	0.0755115
Q5TC12	ATPAF1	-0.177125	-0.120617	0.261778	-0.365557	-0.0749429	-0.169056	0.360362	-0.130485	-0.0857392	0.289448	0.103402	-0.0464203	-0.0359378		-0.0407369	0.0976537		0.0157112	0.0634599		-0.0146839	0.0583772
Q9UBB4	ATXN10	0.447846	0.596566	0.345151	0.870931	0.442683	0.43409	0.725766	0.479359	0.450829	0.839049	0.722375	0.610137	0.5631		0.551862	0.0712783		0.610808	0.0604675		0.579068	0.046292
Q13825	AUH	0.00533669	0.00616701	0.00616231	-0.736064	0.00616544	-0.590882	-0.740361	0.00618448	0.00616982	-0.666609	-0.896271	-0.388264	-0.480656		-0.291925	0.141646		-0.403241	0.147638		-0.343302	0.0992473
P25311	AZGP1	1.56798	1.32991	0.548793	1.67682	1.20669	1.70737	0.526462	1.20541	1.48171	0.593555	1.12768	1.54697	1.64206		1.22343	0.189674		1.26623	0.157256		1.24319	0.120331
P61769	B2M	-0.286537	-0.252813	-0.45712	-0.0902696	-0.171036	-0.305548	-0.49701	-0.230325	-0.333166	-0.553005	-0.0562791	-0.246412	-0.132235		-0.294333	0.0548444		-0.25857	0.0707305		-0.277827	0.0424074
O94766	B3GAT3	-0.051021	-0.123754	-0.265364	0.20079	-0.0771744	0.209797	0.259207	0.0409751	0.0413171	-0.0737369	0.37327	-0.00933421	0.274727		0.021783	0.0759842		0.10787	0.0716241		0.0615153	0.0519081
Q99933	BAG1	0.230036	0.150388	0.144077	0.0949713	0.440629	0.164266	0.257841	0.241222	0.151907	0.267633	0.201856	0.198372	-0.0931375		0.211744	0.0433923		0.161309	0.0533979		0.188466	0.0332858
O95816	BAG2	-0.0682601	-0.430599	0.110903	-0.157939	-0.386119	0.00636426	-0.224996	-0.10135	0.00551881	-0.180469	-0.358812	-0.151491	-0.346144		-0.164378	0.0752662		-0.188791	0.0578878		-0.175646	0.0467114
O95817	BAG3	-0.622593	-0.508414	-0.0842436	-0.377954	-0.295269	-0.393532	-0.422778	-0.465283	-0.401056	-0.131894	-0.496814	-0.242044	-0.375126		-0.386398	0.0639426		-0.352036	0.0569451		-0.370539	0.0418192
Q9UL15	BAG5	-0.155199	-0.150671	-0.154761	-0.0131405	-0.0777803	-0.312874	-0.166539	-0.115387	-0.182776	0.00139404	-0.00969952	0.0159718	-0.0907308		-0.147281	0.0347598		-0.063538	0.0321881		-0.10863	0.02588
P46379	BAG6	0.00646461	-0.0398995	-0.0441572	0.249125	-0.100129	0.155815	0.0755065	-0.0547302	0.0761868	-0.0311044	0.142334	-0.183196	-0.0773438		0.0432465	0.0469449		-0.021309	0.0472034		0.0134517	0.0332887
O75531	BANF1	-0.106533	0.00336262	-0.0942166	-0.231798	0.395872	-0.108084	0.120081	-0.256011	-0.0773634	0.120892	0.0745788	0.4654	0.320805		-0.00304514	0.0781815		0.10805	0.106641		0.0482297	0.0639391
Q9UIG0	BAZ1B	0.62566	0.518483	0.0466187	0.910268	0.422994	0.666794	0.283901	0.514456	0.580226	0.174525	0.399895	0.640079	0.613827		0.496388	0.105826		0.487168	0.0716918		0.492133	0.0632876
Q3SYG4	BBS9	-0.159032	-0.104388	0.202773	-0.14643	-0.190249	-0.0350131	0.221212	-0.0724034	-0.0288278	0.0943931	0.278389	-0.165532	-0.314228		-0.0301611	0.0652348		-0.0347017	0.0839442		-0.0322568	0.0500128
P50895	BCAM	-0.567681	-0.659832	-0.458995	-0.612118	-0.362416	-0.760246	-0.731547	-0.532156	-0.560042	-0.776522	-0.704613	-0.729534	-0.433005		-0.593262	0.0542844		-0.622645	0.0547397		-0.606824	0.0372489
Q9UHQ4	BCAP29	-0.715703	-0.856039	-0.656571	-0.245801	-0.468006	-0.360569	-0.228949	-0.605642	-0.914173	-0.327701	-0.27406	-0.146841	-0.22988		-0.50452	0.0920939		-0.416383	0.118205		-0.463841	0.071633
P51572	BCAP31	-0.405856	-0.479936	-0.426511	-0.296407	-0.259828	-0.153525	-0.540421	-0.344889	-0.587011	-0.52203	-0.526475	-0.204234	-0.20478		-0.366069	0.0511569		-0.398237	0.0695974		-0.380916	0.0407126
P54687	BCAT1	1.1036	0.825052	0.361793	1.06325	0.823886	1.0317	0.601752	0.761467	0.517326	0.578053	0.767765	1.30321	1.10862		0.830148	0.102507		0.839407	0.125278		0.834422	0.0764786
O15382	BCAT2	0.212726	0.266033	0.0652749	0.520339	0.216523	0.349321	-0.0171171	0.228947	0.176156	-0.184431	0.232202	0.386554	0.283442		0.230443	0.0669955		0.187145	0.0797923		0.210459	0.0497154
Q9BXK5	BCL2L13	-0.0862528	0.219755	0.960215	0.544874	0.254502	0.61217	0.74554	0.140811	0.280357	1.03407	1.22871	0.870112	0.532744		0.4644	0.134546		0.681133	0.176513		0.564431	0.108804
Q9Y276	BCS1L	-0.171604	-0.271493	-0.2331	-0.521358	-0.231245	-0.5476	-0.0073029	-0.24191	-0.293524	-0.310489	-0.267965	-0.299177	-0.639199		-0.283386	0.0724643		-0.342044	0.0602781		-0.310459	0.0467306
Q02338	BDH1	-0.18851	-0.147152	0.016268	-0.123413	-0.103481	-0.274824	0.261396	-0.199163	-0.141684	0.0142815	0.105153	0.0447006	-0.15394		-0.0799596	0.0659176		-0.0551087	0.0511453		-0.06849	0.041057
Q9BUT1	BDH2	1.01205	1.05908	0.57126	0.723266	1.25872	0.729524	0.334126	1.09021	0.797959	0.492176	0.63736	1.17804	0.913883		0.812575	0.119684		0.851604	0.10729		0.830588	0.0781138
O76090	BEST1	0.247953	0.302422	-0.26156	0.566914	0.572564	0.618499	-0.142844	0.668327	0.261095	0.55837	0.156131	0.280661	0.279068		0.271993	0.134134		0.367275	0.0812995		0.315969	0.0793919
P21810	BGN	-1.34448	-1.145	-1.26912	-1.42278	-1.32212	-1.55531	-1.85364	-1.30704	-1.2491	-1.73971	-1.49344	-1.48725	-1.64336		-1.41607	0.0872766		-1.48665	0.0768838		-1.44864	0.0573648
O00499	BIN1	0.177173	-0.0469597	0.211405	0.00578022	-0.249818	-0.057592	0.510281	-0.217331	0.0325653	0.445518	0.30987	0.0468533	-0.075562		0.0786099	0.0927332		0.0903188	0.100293		0.084014	0.0652106
Q9UL45	BLOC1S6	0.247732	0.256672	0.01283	0.658321	0.269169	0.206325	-0.106271	0.268223	0.171774	0.036133	0.229383	0.476095	0.387829		0.220682	0.0907919		0.261573	0.0637516		0.239555	0.0550957
P53004	BLVRA	0.850401	0.737238	0.39377	0.454757	0.661387	0.909474	0.501945	0.909379	0.678778	0.460728	0.590131	0.536827	0.576381		0.644139	0.0757		0.625371	0.0637971		0.635477	0.0482994
P30043	BLVRB	1.04305	0.774256	0.456886	0.808984	0.788771	1.39586	0.650314	0.453582	0.740718	0.721243	1.03	0.820465	0.798051		0.845445	0.113459		0.760676	0.0761066		0.806321	0.0687641
P07738	BPGM	0.0858856	0.556107	-0.411555	-0.49432	-0.206095	0.499801	0.09906	0.0576745	0.632893	0.222532	0.22666	-0.390537	-0.213028		0.018412	0.156607		0.0893657	0.147734		0.0511598	0.104425
O95861	BPNT1	0.596481	0.86461	0.756731	0.663271	0.575146	0.74142	0.610837	0.611405	0.596306	0.736123	0.570427	0.834037	0.711519		0.686928	0.0397726		0.676636	0.0414402		0.682178	0.0275377
Q8WUW1	BRK1	-0.0852755	0.0272764	0.115326	0.0345886	-0.0195893	-0.194109	-0.00109124	0.0277325	-0.084123	0.213468	-0.0903438	-0.00448637	0.15296		-0.0175534	0.0372952		0.0358679	0.0507524		0.00710257	0.0304784
Q5VW32	BROX	-0.268898	-0.150369	-0.0753077	-0.22062	-0.291808	-0.213981	-0.140262	-0.193363	-0.269766	-0.158415	0.042264	-0.317018	-0.341996		-0.194464	0.0289342		-0.206382	0.0574295		-0.199965	0.02937
P35613	BSG	0.549922	0.420259	0.0556653	0.752013	1.05622	0.529771	0.453677	0.766723	0.39258	0.701492	0.549871	0.799133	1.02353		0.54536	0.116271		0.705555	0.0886598		0.619296	0.0753847
Q10588	BST1	-0.265005	-0.369816	-0.719041	0.150526	-0.102854	0.636971	-0.637819	-0.294394	-0.245541	-0.65753	-0.526475	0.225375	-0.0960991		-0.18672	0.177666		-0.265777	0.128151		-0.223208	0.108563
Q7L1Q6	BZW1	0.205332	-0.00228097	-0.0942166	-0.143569	0.0143372	-0.269306	-0.298181	-0.00198088	0.00485639	-0.220512	-0.317034	-0.0464203	-0.182931		-0.0839834	0.0661754		-0.127337	0.0540044		-0.103993	0.0421758
Q9Y6E2	BZW2	0.160608	0.131851	-0.0341416	0.116043	0.131912	0.0743341	-0.0596316	0.151373	-0.000948183	0.148496	0.0584026	0.0731625	-0.0791475		0.074425	0.0329213		0.0585565	0.0362494		0.0671011	0.0234458
Q9H0W9	C11orf54	0.482052	0.511472	0.487106	0.360859	0.479762	0.58836	0.543832	0.471595	0.391805	0.544666	0.478454	0.0798994	0.512366		0.493349	0.0266408		0.413131	0.0698408		0.456325	0.03553
Q07021	C1QBP	0.394454	0.213713	0.38299	0.488096	0.550717	0.0840056	0.367495	0.459278	0.269283	0.265033	0.344172	0.50264	0.240037		0.354496	0.0601415		0.34674	0.0451063		0.350917	0.0369638
Q9BXJ0	C1QTNF5	-0.839583	-0.960503	-1.12646	-0.507632	-0.89663	-0.984221	-1.2563	-0.935985	-0.87462	-1.21674	-1.20904	-1.01238	-1.00457		-0.938762	0.0894542		-1.04222	0.0577265		-0.986513	0.0549265
P00736	C1R	0.662761	0.310577	-0.203898	0.711678	0.403642	0.387486	0.290373	0.787421	0.701879	0.233825	0.36027	0.291793	0.297378		0.366088	0.113705		0.445428	0.0966569		0.402707	0.0735382
Q9NZP8	C1RL	0.614275	0.468648	-0.0819933	0.80996	0.512565	0.540212	0.203297	0.70071	0.710808	0.242625	0.322618	0.428835	0.42747		0.438138	0.110395		0.472178	0.0791857		0.453848	0.0671635
P06681	C2	0.731807	1.01663	0.217265	1.51802	0.826278	1.32007	0.146666	1.07276	1.39726	0.475949	0.644793	1.1839	1.37869		0.825248	0.195196		1.02556	0.156761		0.917699	0.125757
Q9Y426	C2CD2	-0.104003	0.115454	0.142637	0.456401	-0.287863	0.304056	0.0433377	-0.0585815	0.18391	0.0468665	0.0269336	0.215079	0.381917		0.0957172	0.0933317		0.132687	0.064977		0.11278	0.0564398
P01024	C3	0.383331	1.12524	0.0151158	0.645639	0.81757	0.472334	0.155707	0.366455	0.698887	-0.162652	0.119327	0.495727	0.681941		0.516419	0.144677		0.366614	0.137572		0.447278	0.0986904
P04003	C4BPA	-0.163949	-0.4166	-0.804562	-0.407044	-0.314056	-0.209935	-1.0117	-0.328884	-0.0302919	-0.821998	-0.59456	-0.961138	-0.262217		-0.475406	0.119284		-0.499848	0.145111		-0.486687	0.0888404
P01031	C5	-0.837586	-0.529444	-0.972139	-0.658311	-0.671667	-0.764378	-1.06255	-0.871047	-0.443997	-1.20628	-0.996249	-1.18952	-1.13755		-0.785154	0.070618		-0.974107	0.118202		-0.872363	0.0690572
P13671	C6	-0.9072	-0.668612	-1.03023	-0.561305	-1.13237	-0.894573	-0.931077	-0.947721	-0.866575	-1.13343	-0.923715	-1.16963	-0.974352		-0.875053	0.0749448		-1.00257	0.0495144		-0.933907	0.0481709
P10643	C7	-1.17104	-0.925339	-1.07842	-1.0306	-1.23596	-1.31732	-1.1734	-0.992147	-0.697128	-1.37966	-1.33343	-1.57592	-1.61209		-1.13315	0.0498191		-1.26506	0.145132		-1.19403	0.0712687
P07357	C8A	-0.377707	-0.182272	-0.576582	-0.183179	-0.609711	-0.452958	-0.82344	-0.308157	-0.0909173	-0.899338	-0.891812	-0.324638	-0.465031		-0.457978	0.088459		-0.496649	0.135283		-0.475826	0.0752146
P07358	C8B	-0.645245	-0.444469	-0.910849	-0.167634	-1.07238	-0.330724	-0.586846	-0.51522	-0.571295	-0.65753	-0.696056	-0.286984	-0.423457		-0.594021	0.120057		-0.52509	0.0621895		-0.562207	0.0687226
P07360	C8G	-0.305014	-0.496419	-0.769097	-0.74124	-0.524027	-0.964808	-0.9951	-0.40484	-0.365882	-1.272	-1.14361	-1.18952	-1.21134		-0.685101	0.0964308		-0.931199	0.173504		-0.798685	0.0977088
P02748	C9	-1.60667	-1.65012	-1.98501	-1.66721	-1.81341	-1.71644	-2.05496	-1.72722	-1.57825	-1.9709	-1.82749	-2.02467	-1.85462		-1.78483	0.0658748		-1.83052	0.0664085		-1.80592	0.0453834
Q5T6V5	C9orf64	0.627338	0.423401	0.41546	0.490484	0.241766	0.559395	0.517252	0.333079	0.457555	0.433684	0.612477	0.440774	0.422115		0.467871	0.046956		0.449947	0.0370835		0.459599	0.0294063
P00915	CA1	0.632244	1.07029	0.146138	0.980898	1.52386	1.78431	0.398343	0.863097	1.0021	1.07983	0.796673	1.30321	1.53104		0.933726	0.223098		1.09599	0.113301		1.00862	0.128118
Q9ULX7	CA14	0.17548	-0.00831291	0.138994	-0.0849406	0.773379	-0.271132	-0.163288	0.0999419	0.338197	-0.188916	-0.182723	-0.15061	-0.217683		0.0800256	0.130097		-0.0502988	0.0909821		0.0198759	0.0806251
P00918	CA2	0.468924	0.435833	1.78422	0.631714	0.376982	0.646143	2.24992	0.370651	1.00809	1.80852	1.4766	0.485132	0.490848		0.941961	0.284648		0.939973	0.243564		0.941044	0.182271
P07451	CA3	0.594382	0.740687	0.877525	1.13486	0.73196	0.901983	1.02898	0.655378	0.638741	0.916479	0.784104	0.661208	0.833955		0.858625	0.0702615		0.748311	0.0465924		0.807711	0.0447058
P22748	CA4	-1.51151	-1.19146	-1.05628	-1.46341	-0.919973	-1.46226	-1.43198	-0.830537	-0.581788	-1.52484	-1.40851	-1.51701	-1.31477		-1.29098	0.0886696		-1.19624	0.161376		-1.24726	0.0855031
Q9Y2D0	CA5B	0.461381	0.54845	0.207299	0.532598	0.540437	0.554448	0.27175	0.515718	0.610216	0.178657	0.269314	0.649036	0.606662		0.445195	0.054826		0.471601	0.0811627		0.457382	0.0457222
Q9Y376	CAB39	0.395872	0.382065	0.288728	0.619109	0.279677	0.548417	0.28717	0.677052	0.812613	0.230593	0.353261	0.495727	0.445962		0.400148	0.0511684		0.502535	0.0868114		0.447404	0.0486957
Q9H9S4	CAB39L	0.520451	0.516699	0.381764	0.475967	0.533817	0.620574	0.433115	0.734358	0.397855	0.535266	0.418088	0.635043	0.420521		0.497484	0.0290178		0.523522	0.056138		0.509501	0.0290998
P54289	CACNA2D1	0.00533669	0.00616701	0.00616231	-0.621691	0.00616544	-0.487651	-0.731547	0.00618448	0.00616982	-0.628295	-0.85592	-0.477616	-0.520954		-0.259579	0.127982		-0.411738	0.142568		-0.329807	0.0937982
Q9NY47	CACNA2D2	-0.177882	-0.301409	-0.289575	0.0571278	-0.155556	-0.369069	-0.174665	-0.246317	-0.241329	-0.295074	-0.204907	0.0159718	-0.217826		-0.201576	0.0525755		-0.198247	0.044669		-0.200039	0.0335879
P27708	CAD	-0.429248	-0.238156	-0.416207	-0.318854	-0.454822	-0.116451	-0.491882	-0.248305	-0.168425	-0.465565	-0.517443	-0.597389	-0.157711		-0.352231	0.0511234		-0.35914	0.0779699		-0.35542	0.0432868
Q9BY67	CADM1	0.4139	-0.161484	0.773568	-0.183179	0.288964	-0.365554	0.496636	0.0662381	0.082827	0.752024	0.297879	0.0425375	-0.136782		0.180407	0.159262		0.184121	0.126838		0.182121	0.0996141
Q8N3J6	CADM2	0.0713917	0.163681	0.532981	-0.0329222	0.09422	-0.0830537	0.540156	0.0985055	0.121735	0.572274	0.388902	0.0685611	0.11507		0.183779	0.0961349		0.227508	0.083795		0.203962	0.0622745
Q8N126	CADM3	-0.511897	0.0109339	-0.160004	-0.291108	-0.371737	-0.175602	0.0793632	-0.504675	-0.330962	0.0279842	0.0266528	-0.290815	-0.187524		-0.202864	0.0786415		-0.20989	0.085857		-0.206107	0.0555307
Q8NFZ8	CADM4	0.053313	0.00595577	-0.162313	-0.00932465	-0.00758967	-0.153525	-0.171147	0.0569118	-0.0135665	-0.288735	-0.203479	0.00892069	-0.14131		-0.0635186	0.0358524		-0.0968763	0.0553572		-0.0789145	0.0309584
Q9ULU8	CADPS	0.00385803	-0.159063	0.6225	-0.342132	-0.206095	-0.448148	0.304005	-0.328884	0.0178433	0.333826	0.0346144	-0.453171	-0.420795		-0.0321535	0.142959		-0.136094	0.128118		-0.0801262	0.094248
P05937	CALB1	0.472051	0.297235	1.31308	0.897673	0.273413	0.529771	1.94024	0.393103	0.704804	1.46574	1.54734	0.613927	0.512366		0.817637	0.233065		0.872879	0.205088		0.843134	0.150918
P22676	CALB2	-0.030106	-0.105439	1.1405	0.349701	-0.190742	0.128814	2.04049	-0.214999	0.172925	1.33331	0.773145	0.434016	0.31978		0.476174	0.311083		0.469696	0.21745		0.473184	0.187479
Q05682	CALD1	-0.891603	-0.812018	-0.853185	-0.465335	-0.537786	-0.534064	-0.829532	-0.500643	-0.746871	-0.637069	-0.610898	-0.118012	-0.462233		-0.70336	0.0687197		-0.512621	0.0891473		-0.615327	0.0596086
P0DP23	CALM1	0.62578	0.799129	0.912315	0.933598	0.530566	0.955768	1.21121	0.321669	0.244786	0.9116	1.2635	1.10881	1.17237		0.852623	0.0855488		0.837121	0.181668		0.845468	0.0912259
P27797	CALR	0.167558	0.314358	0.174347	0.208298	0.237768	-0.0696097	0.040807	0.202427	0.127401	0.0967284	0.0346144	0.238807	0.248612		0.153361	0.0485722		0.158098	0.0349421		0.155547	0.0295034
O43852	CALU	0.191914	0.138793	-0.0146127	0.418396	0.452301	0.324861	0.00731281	0.673252	0.343145	0.158621	0.124523	0.720102	0.506559		0.216995	0.0710332		0.421034	0.103797		0.311167	0.0655176
Q8IU85	CAMK1D	-0.0274105	0.0643088	0.499092	0.335739	0.130097	0.215136	0.145606	0.132865	0.195624	0.173893	-0.0453482	0.135161	0.089398		0.194653	0.0665265		0.113599	0.0351423		0.157243	0.0395615
Q13554	CAMK2B	0.376365	0.188091	0.339149	-0.156176	0.326954	-0.25334	-0.0732053	0.16824	0.191069	-0.13293	-0.224512	-0.126803	-0.231366		0.106834	0.0991615		-0.0593838	0.0777472		0.030118	0.0661964
Q13557	CAMK2D	-0.00569643	-0.101345	0.0416297	-0.453039	0.381513	-0.678188	0.107727	0.0694699	0.352305	-0.126678	-0.0367942	-0.48955	-0.719369		-0.101057	0.134774		-0.158436	0.158418		-0.12754	0.0989176
Q13555	CAMK2G	-0.220194	-0.245642	-0.0942553	0.0611823	-0.141331	-0.235696	-0.0505426	-0.252479	-0.196133	-0.0673614	-0.243845	-0.0741033	-0.14131		-0.132354	0.0427927		-0.162539	0.0332459		-0.146285	0.0269155
Q86VP6	CAND1	0.577925	0.607823	0.731926	0.390691	0.487611	0.539695	0.595306	0.544161	0.45184	0.626915	0.563592	0.391739	0.39455		0.561568	0.0401527		0.495466	0.0396391		0.531059	0.0287528
O75155	CAND2	-0.10095	-0.101159	-0.033532	0.0556573	0.0303923	0.362674	-0.00247998	0.000342217	-0.091458	0.15273	0.0203909	0.321973	0.204924		0.0300862	0.059915		0.101484	0.0621755		0.0630388	0.0426084
P27824	CANX	-0.143608	0.0214724	0.0385107	-0.505449	0.0256457	-0.42328	-0.10027	-0.022847	-0.00386664	0.0164521	-0.304346	-0.144605	-0.167078		-0.155283	0.0843935		-0.104382	0.0506249		-0.13179	0.0496392
Q01518	CAP1	0.181689	0.52123	0.336339	0.268939	0.421851	0.2957	0.396166	0.303415	0.31179	0.3154	0.505356	0.619466	0.528684		0.345988	0.0421266		0.430685	0.0561076		0.385079	0.0350964
P40121	CAPG	0.278103	0.477248	0.258291	0.727421	0.666602	-0.330724	-0.314669	0.0546167	0.490156	-0.227608	-0.239731	-0.077312	-0.191329		0.251753	0.162573		-0.0318679	0.113872		0.120851	0.106185
P07384	CAPN1	-0.213501	-0.169845	-0.354652	-0.540513	-0.242015	-0.379142	-0.289854	-0.183648	-0.0534543	-0.226614	-0.291912	-0.15659	-0.279547		-0.312789	0.0472681		-0.198628	0.0361017		-0.260099	0.0334975
P17655	CAPN2	0.079207	-0.0611405	-0.354652	0.000814514	0.178174	-0.0095077	-0.301208	-0.0846399	0.124296	-0.188076	-0.14297	0.0518419	-0.0451232		-0.0669018	0.0735206		-0.0474452	0.0481815		-0.0579218	0.0436983
P04632	CAPNS1	-0.181906	-0.226975	-0.469334	-0.650908	-0.190742	-0.421066	-0.0983234	-0.27702	-0.215349	-0.303459	-0.217022	-0.130971	-0.621567		-0.319893	0.0748946		-0.294231	0.0698493		-0.308049	0.0496192
Q14444	CAPRIN1	-0.131556	-0.110159	0.146138	0.0170035	-0.213501	-0.473944	-0.172831	-0.161596	-0.110049	-0.202138	-0.325458	-0.282033	-0.299315		-0.134121	0.0732322		-0.230098	0.0348653		-0.178418	0.0432251
P52907	CAPZA1	0.102693	0.0891322	-0.0925002	0.338413	0.0104585	0.123912	-0.102702	0.209106	0.0372628	-0.223606	-0.0167793	0.0731625	0.14559		0.067058	0.056926		0.0374561	0.061516		0.0533956	0.0402287
P47755	CAPZA2	0.194465	-0.0336997	0.0467861	-0.358425	0.128715	-0.357528	-0.10027	0.231297	0.127401	-0.374819	-0.183961	-0.228124	-0.47708		-0.0685651	0.0832594		-0.150881	0.113595		-0.106557	0.0669939
P47756	CAPZB	-0.409907	-0.303717	-0.235201	-0.401802	-0.129407	-0.429984	-0.280218	-0.264863	-0.31314	-0.189628	-0.353741	-0.0391624	-0.257307		-0.312891	0.0413699		-0.236307	0.0454589		-0.277544	0.0312994
P49589	CARS1	0.703901	0.484933	0.565821	1.08336	0.741361	0.790379	0.452369	0.626208	0.599888	0.391252	0.45931	0.667924	0.632022		0.688875	0.0818786		0.562767	0.0452318		0.630671	0.0502768
O14936	CASK	-0.388049	-0.372558	-0.25755	-0.612118	-0.406581	-0.46461	-0.260292	-0.364397	-0.472561	-0.290159	-0.505288	-0.437764	-0.475314		-0.394537	0.0462161		-0.424247	0.0332937		-0.408249	0.0283991
P20810	CAST	0.425347	0.526616	0.0865928	0.112902	0.376982	-0.0151282	-0.32272	0.482602	0.424725	-0.38811	-0.293908	0.261735	-0.0654836		0.170085	0.111535		0.0702601	0.15204		0.124012	0.0894483
P04040	CAT	0.300514	0.707131	-0.162397	0.350316	0.748884	0.904497	0.0219334	0.596917	0.475807	0.522302	0.223051	0.665967	0.977544		0.410126	0.149717		0.576932	0.101203		0.487113	0.0926322
Q03135	CAV1	-1.25109	-1.03745	-1.12436	-1.42278	-1.00298	-1.21867	-0.851776	-1.01549	-1.08428	-0.95816	-0.791804	-1.1377	-1.19935		-1.12987	0.070776		-1.03113	0.0592519		-1.0843	0.0471774
Q6NZI2	CAVIN1	-0.605595	-0.812018	-0.910849	-0.625481	-0.650568	-1.24838	-1.3725	-0.598676	-0.651561	-1.29765	-1.0764	-1.1488	-0.942395		-0.889341	0.117102		-0.95258	0.113852		-0.918529	0.0791674
O95810	CAVIN2	-0.133801	-0.346308	-0.637967	-0.74124	-0.341316	-0.819241	-0.829532	-0.3128	-0.151943	-0.987406	-0.667233	-0.954002	-0.681699		-0.549915	0.103877		-0.625847	0.137335		-0.584961	0.0815576
Q969G5	CAVIN3	-1.07238	-1.08527	-0.810018	-0.965964	-0.90889	-0.839858	-0.916062	-1.12569	-1.12118	-0.817733	-0.77025	-0.784077	-1.14685		-0.942635	0.040154		-0.960962	0.0764919		-0.951094	0.0395758
P16152	CBR1	1.06404	0.981254	0.661	0.697957	0.831687	0.762382	0.698774	0.922113	0.782173	0.613827	0.961846	0.623656	0.504791		0.813871	0.0584778		0.734734	0.0750047		0.777347	0.0461762
P83916	CBX1	-0.700314	-0.673432	0.186155	-0.358114	-0.060738	-0.406626	0.0727594	-0.0967942	-0.547694	0.218452	-0.189942	-0.184213	-0.265544		-0.277187	0.133037		-0.177623	0.101372		-0.231234	0.083346
Q13185	CBX3	-0.350826	-0.328076	0.183066	0.269782	-0.143249	0.258531	0.433115	0.00197885	-0.299126	0.474252	0.397113	0.231796	0.414261		0.046049	0.119235		0.203379	0.122373		0.118663	0.0849713
Q8N163	CCAR2	-0.0942472	-0.13319	0.429405	0.271206	0.411519	-0.0541274	-0.140262	-0.0250308	0.0518326	-0.268013	-0.243845	0.212305	-0.0522389		0.0986148	0.0986143		-0.0541652	0.0741178		0.028101	0.0644829
O60826	CCDC22	0.0555497	-0.0402861	-0.110786	-0.130309	0.0290531	0.031011	-0.379358	0.00851798	-0.100542	-0.229039	-0.307674	0.0072839	-0.180256		-0.0778749	0.0571608		-0.133618	0.0525122		-0.103603	0.0383969
Q96A33	CCDC47	-0.111016	-0.0610861	-0.111471	1.14438	-0.0951618	-0.512853	-0.392787	-0.113553	-0.125416	-0.32185	-0.46296	-0.290715	-0.29398		-0.0199996	0.204802		-0.268079	0.0536296		-0.134498	0.114544
Q8ND76	CCNY	-0.171637	-0.164695	-0.0672918	-0.561305	-0.301959	-0.244132	-0.0765615	-0.156356	-0.211437	-0.0516777	-0.0959431	-0.197929	-0.406892		-0.226797	0.0641348		-0.186706	0.0505342		-0.208294	0.0403956
O14618	CCS	0.289915	0.300774	0.152989	0.354226	0.618705	0.372242	0.232351	0.456536	0.256135	0.358024	0.331495	0.517658	0.454492		0.3316	0.0554275		0.395723	0.0396028		0.361196	0.0348411
P78371	CCT2	0.013729	0.0393243	0.339149	0.111877	-0.0202735	0.0926521	0.301509	-0.00573069	-0.0137796	0.335815	0.150732	0.107746	0.0820657		0.125424	0.0532421		0.109475	0.0523291		0.118063	0.035987
P49368	CCT3	-0.327338	-0.342146	0.0137242	-0.47128	-0.371737	-0.443745	0.0700694	-0.350554	-0.422007	0.0501456	-0.154823	-0.422698	-0.239351		-0.267493	0.0824688		-0.256548	0.0749498		-0.262441	0.0539799
P50991	CCT4	-0.490866	-0.385336	0.101998	-0.391895	-0.583866	-0.263308	0.0684484	-0.427363	-0.459204	0.116942	-0.0861433	-0.308523	-0.314228		-0.277832	0.100948		-0.24642	0.0902206		-0.263334	0.0657979
P48643	CCT5	-0.319952	-0.08229	0.313202	-0.253522	-0.440481	-0.13995	0.0660946	-0.167554	-0.258047	0.0767177	-0.067025	-0.392723	-0.0503875		-0.122414	0.0956919		-0.14317	0.0680257		-0.131994	0.0580013
P40227	CCT6A	-0.444228	-0.451582	-0.0754277	-0.361295	-0.336411	-0.301766	-0.00109124	-0.43289	-0.523301	0.00384965	-0.206691	-0.374681	-0.197988		-0.281686	0.0666004		-0.288617	0.0782647		-0.284885	0.048715
Q99832	CCT7	-0.268644	-0.242047	0.0971127	-0.391895	-0.388959	-0.473944	-0.0392228	-0.430076	-0.249787	0.0750774	-0.235115	-0.379133	-0.233737		-0.243943	0.0778679		-0.242128	0.0718546		-0.243105	0.0512389
P50990	CCT8	-0.309359	-0.277348	-0.0205298	-0.248174	-0.374742	-0.229038	0.144052	-0.249995	-0.316826	0.00611802	-0.0497617	-0.239614	-0.207686		-0.187877	0.0692121		-0.176294	0.0514654		-0.182531	0.0424481
P08571	CD14	-0.368427	-0.360138	-0.738655	-0.107996	-0.511897	-0.417535	-0.846741	-0.264863	0.0518326	-0.721247	-0.559891	-0.66905	-0.368705		-0.47877	0.0940507		-0.421987	0.118553		-0.452563	0.0717713
Q86VB7	CD163	-0.460364	-0.499919	-0.313889	-0.274433	-0.993528	-0.574476	-0.894383	-0.581043	-0.283649	-0.827081	-0.891812	-0.743403	-0.514222		-0.572999	0.104019		-0.640202	0.0922646		-0.604016	0.0681446
P28907	CD38	-0.341565	-0.340758	-0.240205	0.0201115	-0.33318	-0.349127	-0.262808	-0.296184	-0.355414	-0.40722	-0.548892	-0.313267	-0.0359378		-0.263933	0.0500542		-0.326153	0.0688791		-0.29265	0.0408299
P16070	CD44	-0.3124	-0.0591548	-0.140941	-0.256749	-0.489779	-0.149655	-0.373422	-0.200815	0.254428	-0.209964	-0.489875	-0.522204	-0.101845		-0.254586	0.0566745		-0.211713	0.11594		-0.234798	0.0590579
Q08722	CD47	-0.809759	-0.675816	-0.591142	-1.14384	-0.780906	-1.06295	-0.78739	-0.69771	-0.750343	-0.902755	-0.918753	-0.914764	-1.03797		-0.835973	0.0752736		-0.870383	0.0508821		-0.851855	0.0452537
P13987	CD59	-0.637807	-0.410025	-0.566148	-0.250063	-0.989794	-0.360109	-0.384592	-0.837464	0.0389439	-0.316901	-0.268192	-0.32166	-0.308251		-0.514077	0.0932648		-0.335587	0.115179		-0.431697	0.0745174
P08962	CD63	-0.224923	-0.499919	-0.910849	-0.305994	-0.0281517	-0.143249	-0.780624	-0.147014	-0.431616	-0.59206	-0.576784	-0.058881	-0.164942		-0.413387	0.12519		-0.328549	0.0955902		-0.374231	0.0782676
P60033	CD81	-0.549951	-0.50381	-0.496266	-0.498662	-0.151757	-0.574476	-0.465573	-0.528748	-0.488169	-0.422405	-0.387833	-0.643625	-0.420795		-0.462928	0.0536546		-0.481929	0.0385189		-0.471698	0.0326783
P27701	CD82	-0.574441	-0.311284	-0.406927	-0.57651	-0.284227	-0.621261	-0.778956	-0.279908	-0.508892	-0.520379	-0.622533	-0.450179	-0.41187		-0.507658	0.068023		-0.465627	0.0472966		-0.488259	0.0413828
P21926	CD9	-1.23088	-1.20157	-1.17134	-1.557	-1.13786	-1.47406	-1.45209	-1.16823	-1.05922	-1.35462	-1.27459	-1.45289	-1.26371		-1.31783	0.0644684		-1.26221	0.0563005		-1.29216	0.0423391
P14209	CD99	-0.301859	-0.143741	-0.273506	0.101884	-0.126858	0.35808	-0.652979	-0.0603803	-0.193322	0.112227	-0.0838834	0.446901	0.804599		-0.148426	0.120855		0.171024	0.156232		-0.000987656	0.103633
Q16543	CDC37	0.110034	-0.0692042	0.02195	0.472771	0.293294	0.0428469	0.148684	0.0775388	0.00485639	0.220105	0.0463777	0.624626	0.288669		0.145768	0.0693708		0.210362	0.0939161		0.175581	0.0554818
P60953	CDC42	0.107607	0.287117	0.140451	0.0255266	0.126033	0.213069	0.292768	0.0942388	0.117284	0.133226	0.380512	0.480222	0.311878		0.170367	0.0372297		0.252893	0.065657		0.208456	0.03665
Q5VT25	CDC42BPA	0.121492	-0.115598	-0.3463	0.631714	0.0875143	0.315491	-0.454425	-0.0224648	-0.047246	-0.255898	-0.342802	0.196272	0.048181		0.0342697	0.142477		-0.0706598	0.0809571		-0.0141593	0.0833888
Q9Y5S2	CDC42BPB	-0.180288	-0.211093	-0.190563	-0.159597	-0.14691	-0.217378	-0.32056	-0.243026	-0.217031	-0.220512	-0.284996	-0.0927817	-0.188573		-0.20377	0.0217063		-0.20782	0.0264864		-0.205639	0.0161895
Q99459	CDC5L	-0.243525	-0.125127	0.152284	-0.204948	-0.227764	-0.301766	-0.00109124	-0.218351	-0.300573	0.148496	-0.0649423	-0.111374	-0.484844		-0.135991	0.0604823		-0.171931	0.0883941		-0.152579	0.0501421
P12830	CDH1	-0.0433195	-0.00996995	-0.481099	0.448296	-0.182449	0.168281	-0.717439	-0.153225	-0.115996	-0.525013	-0.487415	0.422508	0.0136743		-0.116814	0.147617		-0.140911	0.142561		-0.127936	0.09893
P19022	CDH2	0.569762	0.389402	0.279189	0.694017	0.642266	0.52187	0.462966	0.480803	0.447828	0.598992	0.299626	0.84231	0.587411		0.508496	0.0545725		0.542828	0.0745768		0.524342	0.0435406
O14735	CDIPT	-0.926625	-1.145	-0.691208	-1.36187	-1.08088	-0.494357	-0.89965	-1.08773	-1.05302	-0.812902	-1.22902	-0.692047	-1.17967		-0.942798	0.109337		-1.00906	0.0865225		-0.973382	0.0689139
Q00535	CDK5	-0.0271962	0.0606488	-0.228679	0.0216406	-0.206515	0.344814	0.091561	-0.162789	-0.32991	-0.0763557	-0.308995	-0.455663	-0.46887		0.00803923	0.0734614		-0.30043	0.0639182		-0.134331	0.0648787
Q96JB5	CDK5RAP3	-0.101814	0.00598017	0.176644	-0.193344	-0.0369386	-0.0366241	0.230819	-0.0123672	0.00840579	0.318975	0.0979677	-0.0321925	-0.0451232		0.0063889	0.0566284		0.0559443	0.0565274		0.0292606	0.0390987
O95674	CDS2	-0.393861	-0.299519	-0.184357	-0.128727	-0.203594	-0.191409	-0.147785	-0.0606322	-0.193418	-0.216712	-0.240788	-0.162585	-0.196672		-0.221322	0.0353356		-0.178468	0.0258449		-0.201543	0.0224198
Q9Y6K0	CEPT1	-0.200807	-0.482956	-0.729083	-0.571857	-0.347198	-0.391313	-0.301208	-0.235496	-0.401056	-0.481197	-0.176085	-0.743403	-0.44855		-0.43206	0.0672271		-0.414298	0.0822292		-0.423862	0.0502358
Q9Y5P4	CERT1	-0.0995842	-0.18539	-0.293766	-0.365557	-0.18626	0.173634	-0.313149	-0.18786	-0.0202484	-0.125003	-0.237598	-0.191608	-0.0714922		-0.181439	0.0684314		-0.138968	0.0335319		-0.161837	0.0389147
P23141	CES1	0.29464	0.488512	-0.198021	0.239279	0.20574	0.176169	-0.338416	0.344498	0.157824	-0.204999	0.116116	0.155357	-0.0491903		0.123986	0.109349		0.086601	0.0775999		0.106732	0.0663795
P41208	CETN2	-0.952908	-1.04207	-0.180961	-0.341586	-0.709738	-0.496829	-0.00469495	-0.947721	-0.763747	-0.0453175	-0.220202	-0.362683	-0.344371		-0.532684	0.14701		-0.44734	0.139221		-0.493295	0.0984725
P00751	CFB	1.35185	1.22801	0.237658	1.21756	0.808956	1.1433	0.413388	0.790011	1.09588	0.420021	0.50713	1.22229	1.29031		0.914387	0.165768		0.887608	0.151711		0.902028	0.108808
P08603	CFH	0.274037	0.801727	-0.00921145	0.714588	0.483245	0.410641	0.0241416	0.275099	0.669689	-0.178149	0.0218713	0.457128	0.566204		0.385596	0.118576		0.301974	0.134015		0.347001	0.085931
P36980	CFHR2	0.0303606	0.181501	-0.376027	-0.163751	-0.160643	-0.0015818	-0.230068	0.158845	0.485457	-0.219445	-0.113572	-0.177823	0.00570449		-0.102887	0.0701555		0.0231944	0.108071		-0.0446957	0.0624527
Q9BXR6	CFHR5	-1.25995	-1.35783	-1.37833	-1.144	-1.42659	-1.23193	-1.35625	-1.00989	-1.13056	-1.31834	-1.3579	-1.20997	-1.19671		-1.30784	0.0374204		-1.20389	0.0516142		-1.25986	0.0333629
P05156	CFI	0.85209	1.23932	0.497507	1.60668	0.78066	1.27199	0.564173	0.852056	1.07672	0.430686	0.728879	1.04089	1.28475		0.973203	0.154821		0.902331	0.122599		0.940493	0.0972
P23528	CFL1	0.602262	0.713324	0.881521	0.965583	0.904665	0.989293	1.00005	0.650452	0.841698	0.997532	0.975126	1.38767	1.08515		0.865243	0.0572564		0.989604	0.10079		0.922641	0.0561826
Q9Y281	CFL2	0.462801	0.364361	0.243642	0.642634	0.425256	0.56255	0.36488	0.627579	0.412261	0.234583	0.367546	0.69314	0.449599		0.438018	0.0504054		0.464118	0.069302		0.450064	0.040271
Q6NUI6	CHADL	-0.298202	-0.649196	-0.671914	-0.755533	-0.409219	-1.15869	-1.22459	-0.574327	-0.240251	-1.272	-1.30925	-1.32943	-1.35462		-0.738191	0.13164		-1.01331	0.196744		-0.86517	0.116949
Q9NX63	CHCHD3	0.168753	-0.027195	0.104713	-0.116695	0.338531	-0.241616	-0.0426582	0.26573	0.114983	-0.15232	-0.194603	-0.101041	-0.168805		0.0262618	0.0729927		-0.0393428	0.0762284		-0.00401723	0.051391
Q14839	CHD4	-0.606401	-0.532608	-0.542213	0.796119	-0.43683	-0.00247867	-0.0294222	-0.648398	-0.511748	0.0988221	-0.032411	0.324621	0.0598504		-0.193405	0.189551		-0.118211	0.15473		-0.1587	0.119977
P36222	CHI3L1	1.66405	1.07029	0.535003	0.91983	0.778577	0.755773	0.0674728	0.8107	0.957639	-0.121928	-0.105348	0.371883	0.528684		0.827285	0.185037		0.406938	0.184796		0.633279	0.139444
Q9BWS9	CHID1	0.0481906	0.26291	0.0287016	0.00865144	0.0691635	0.915975	0.23369	0.241456	0.0178433	0.383182	0.187844	0.43637	0.407368		0.223897	0.121483		0.279011	0.065833		0.249334	0.069783
O00533	CHL1	0.568834	0.304725	0.41845	0.839679	0.344393	0.846682	0.182847	0.409649	0.391229	0.403921	0.823101	0.428455	0.474252		0.500801	0.0987886		0.488435	0.0679704		0.495094	0.059322
Q9H444	CHMP4B	-0.0568234	-0.165662	-0.262834	-1.04033	-0.00865437	-0.878384	-0.218889	-0.105396	0.0335518	-0.291252	-0.472406	-0.919771	-0.85442		-0.375939	0.155247		-0.434949	0.159286		-0.403174	0.106959
Q9NZZ3	CHMP5	-0.0557897	-0.00992239	0.0288061	0.321763	0.00965021	0.157	0.0566494	0.0427374	-0.0380883	0.167106	0.0252802	0.286096	0.0524634		0.0725938	0.0484607		0.0892658	0.0478309		0.0802886	0.0328327
Q96FZ7	CHMP6	-0.770145	-0.571504	-1.09545	-0.490425	-1.21443	-0.542004	-0.54448	-0.776056	-0.236164	-0.403362	-0.582159	-0.589668	-0.47708		-0.746919	0.111281		-0.510748	0.0752281		-0.637917	0.0746827
Q99653	CHP1	-0.319952	-0.649196	-0.745295	-0.0978308	-0.350339	-0.244132	-0.754762	-0.562416	-0.47251	-0.594264	-0.731203	-0.207609	-0.350236		-0.451644	0.0991618		-0.486373	0.0761139		-0.467673	0.0615341
Q14011	CIRBP	-1.00592	-1.20205	-0.313036	-0.940832	-0.913505	-1.3928	-0.298181	-0.985993	-0.980781	-0.773402	-0.538564	-0.882526	-0.89692		-0.866619	0.157818		-0.843031	0.0686599		-0.855732	0.0873137
Q9NZ45	CISD1	-0.499216	-0.420278	-0.136652	-0.150233	-0.269066	-0.372568	-0.248003	-0.593768	-0.156602	-0.293683	-0.433504	-0.338122	-0.0503875		-0.299431	0.0516838		-0.311011	0.0791113		-0.304776	0.0438808
Q8N5K1	CISD2	0.232211	0.378271	0.112433	0.173985	0.2306	0.257922	0.260392	0.297172	0.212735	0.0921728	0.265	0.160807	0.308812		0.235116	0.0310411		0.222783	0.034505		0.229424	0.0221705
Q07065	CKAP4	-0.32477	-0.33479	-0.338337	-0.248174	-0.254388	-0.171018	-0.481256	-0.281213	-0.437943	-0.359385	-0.304346	-0.220754	-0.219947		-0.307533	0.0368887		-0.303931	0.0344104		-0.305871	0.0243791
Q14008	CKAP5	-0.0880155	-0.137648	-0.0958718	-0.124779	0.0473461	-0.0136567	-0.0738417	0.00246701	-0.154118	0.0311688	-0.227474	-0.108512	0.128671		-0.0694952	0.0246541		-0.0546328	0.0538198		-0.0626356	0.0269305
P12277	CKB	0.325818	0.0367547	2.2597	0.588254	0.212795	0.157353	2.37565	0.30496	0.815225	1.98748	1.78513	0.376373	0.431932		0.850903	0.384376		0.950184	0.305805		0.896725	0.240761
P12532	CKMT1A	-0.389898	-0.668612	0.526955	0.475967	-0.464695	-0.00536225	0.691181	-0.200815	-0.597605	0.653809	0.328932	0.0764278	-0.0417385		0.0236479	0.206621		0.0365018	0.176325		0.0295805	0.132198
Q7Z460	CLASP1	0.181951	0.211926	0.38537	0.216052	0.280382	0.354567	0.316217	0.219582	0.140871	0.525051	0.187844	0.346356	0.219195		0.278067	0.0293929		0.27315	0.0575525		0.275797	0.0294971
O75122	CLASP2	0.339326	0.332061	0.320884	0.453019	0.15763	0.170881	0.307197	0.219251	0.284689	0.33825	0.268234	-0.0524098	0.274727		0.297285	0.0388423		0.222123	0.0570584		0.262595	0.0339011
Q86T13	CLEC14A	-0.679735	-0.259453	-0.379143	-0.593665	-0.478865	-0.627454	-0.896231	-0.378879	-0.638804	-0.843513	-0.576784	-0.811475	-0.59206		-0.559221	0.0790851		-0.640252	0.0695943		-0.59662	0.0524528
P05452	CLEC3B	0.831687	0.726543	0.0263307	1.08044	0.614928	0.698989	-0.121686	0.553349	0.776548	0.241911	0.211163	0.809991	0.587411		0.551034	0.165017		0.530062	0.104511		0.541355	0.0971643
O00299	CLIC1	0.858208	0.994227	0.467908	0.906074	0.974438	1.02926	0.73696	1.11302	1.1781	0.827699	1.08319	1.09963	1.11906		0.85244	0.0740598		1.07012	0.0502346		0.952907	0.0542522
O15247	CLIC2	0.667472	0.589371	0.199813	1.0079	0.63607	0.823807	0.239659	0.686495	0.46554	0.205813	0.498469	1.12494	0.678107		0.594871	0.110438		0.609894	0.125476		0.601804	0.0794737
Q9Y696	CLIC4	0.653815	0.868175	0.602463	0.698903	1.18072	0.690071	0.299941	0.898814	0.725456	0.549391	0.523054	1.03421	0.916479		0.713441	0.101172		0.774567	0.0855108		0.741653	0.0651102
Q96NY7	CLIC6	0.900807	1.13186	0.268342	1.08558	0.814976	1.37822	0.804679	1.16153	0.611828	0.465685	1.07337	1.33002	1.3558		0.912067	0.131944		0.999707	0.153096		0.952516	0.0967137
Q14677	CLINT1	-0.0324389	0.147614	-0.0538139	-0.0555993	0.358078	-0.0342467	-0.0751131	0.190468	0.027421	-0.0878669	-0.05887	0.0384265	0.0127432		0.0363544	0.0606734		0.0203871	0.0397331		0.0289849	0.0360553
O96005	CLPTM1	0.0400167	-0.18409	-0.311174	-0.233825	0.09268	0.0505775	-0.447838	-0.119128	-0.110049	-0.394729	-0.119135	-0.233644	-0.186358		-0.14195	0.0783233		-0.19384	0.0447885		-0.1659	0.0457509
P09496	CLTA	0.0756381	0.123852	0.391675	-0.23663	0.122877	-0.0982431	0.388281	0.0611774	-0.0371598	0.445518	0.2079	0.215835	0.22175		0.109636	0.0875372		0.185837	0.067176		0.144805	0.0552369
P09497	CLTB	0.0775651	-0.052645	0.542767	0.239279	-0.124466	-0.114862	0.729162	0.0736628	0.044255	0.41742	0.61713	0.0602373	0.28532		0.185257	0.127313		0.249671	0.0954806		0.214987	0.0787588
Q00610	CLTC	-0.227285	-0.0971962	-0.039026	-0.196028	-0.321505	-0.215594	0.0566494	-0.119128	-0.213253	-0.13402	0.00384474	-0.268585	-0.164065		-0.148569	0.0486977		-0.149201	0.0379184		-0.148861	0.0302486
P10909	CLU	-1.14082	-1.13145	-1.22693	-1.21735	-0.963445	-1.50815	-1.94957	-1.29069	-0.780998	-1.85462	-1.44226	-1.70776	-1.51684		-1.30539	0.123852		-1.43219	0.153376		-1.36391	0.0947981
P23946	CMA1	-1.01698	-1.03787	-1.06694	-1.12702	-0.978629	-1.20109	-1.29	-1.03964	-0.856385	-1.28494	-1.42779	-1.64352	-1.13015		-1.10265	0.0418544		-1.2304	0.115316		-1.16161	0.0580251
Q8NFW8	CMAS	0.138863	0.0740898	0.484991	0.122808	-0.0781429	0.0369546	0.60571	0.153194	0.110099	0.371331	0.613785	-0.106671	0.288669		0.197896	0.0945272		0.238401	0.100649		0.216591	0.0662404
P30085	CMPK1	0.939433	0.720711	0.691413	0.849971	0.884536	0.772168	0.776511	0.9509	0.782173	0.833955	0.971616	1.2097	0.640441		0.804963	0.0339175		0.898131	0.0794207		0.847964	0.0412614
Q96KP4	CNDP2	0.577925	0.62009	0.953766	0.280078	0.586357	0.3994	0.955557	0.632289	0.582736	0.888775	0.731813	0.491149	0.412228		0.624739	0.0964803		0.623165	0.0697599		0.624012	0.0586688
P29973	CNGA1	0.507221	0.593679	1.20357	0.52442	0.670517	0.505212	1.21616	0.566605	0.66871	1.3558	1.31459	0.752975	0.524514		0.745826	0.121833		0.863866	0.15265		0.800306	0.0936269
Q14028	CNGB1	0.437438	0.340681	0.443783	0.768013	0.235449	0.598228	0.619159	0.51025	0.343556	0.209835	0.598116	0.346356	0.391896		0.491822	0.0686007		0.400001	0.0558859		0.449443	0.0451912
P51911	CNN1	-0.43935	-0.215633	-0.302144	-0.621691	-0.351503	-0.322779	-0.925128	-0.309584	-0.394651	0.191495	-0.454541	-0.226515	-0.557168		-0.454033	0.0923116		-0.291827	0.107337		-0.379169	0.0710966
Q99439	CNN2	-0.504386	-0.545864	-0.858648	-0.329984	-0.747789	-0.280548	-0.776595	-0.449255	-0.465435	-0.711783	-0.828403	-0.440677	-0.652566		-0.577688	0.085003		-0.591353	0.0666317		-0.583995	0.0529434
Q15417	CNN3	0.0885124	0.254052	-0.195434	-0.496582	-0.197812	-0.330724	-0.165377	0.131053	0.0736289	-0.218178	-0.0401983	-0.714287	-0.215398		-0.149052	0.0948065		-0.163897	0.124799		-0.155903	0.0736182
A5YKK6	CNOT1	-0.350305	-0.209738	-0.400604	-0.264423	-0.5417	0.00449532	-0.15444	-0.433455	-0.63296	-0.137585	-0.0439965	-0.344133	-0.241885		-0.273816	0.0671866		-0.305669	0.0867412		-0.288518	0.0518002
P09543	CNP	-0.0175683	-0.128241	-0.184357	-0.477429	-0.0098649	-0.583023	-0.162468	-0.17101	-0.249787	-0.414831	-0.401141	-0.463069	-0.62614		-0.223279	0.0839666		-0.387663	0.0656824		-0.299148	0.0573364
Q9Y2B0	CNPY2	0.115058	0.112072	-0.155484	0.0676522	0.154117	-0.0230271	0.0110208	0.192908	-0.0607391	0.175614	0.0879963	0.152671	-0.00167943		0.0402012	0.040131		0.0911284	0.0420203		0.063706	0.0287553
Q8N129	CNPY4	0.214408	0.189968	0.456054	0.301483	0.291807	0.306486	0.359064	0.251107	0.150873	0.499859	0.215182	0.412429	-0.0202477		0.302753	0.0335703		0.251534	0.0759105		0.279113	0.0382871
P26992	CNTFR	0.10775	0.0295832	0.144098	0.485912	0.0732432	0.723495	0.148	0.107902	0.0391269	0.162177	0.175699	0.298151	0.0184781		0.244583	0.0977518		0.133589	0.0418348		0.193355	0.0562523
Q12860	CNTN1	-0.878969	-0.541991	-0.522494	-0.321437	-0.329273	-0.525296	-0.481256	-0.588344	-0.688914	-0.490473	-0.614208	0.0049666	-0.511621		-0.514388	0.0701124		-0.481432	0.101601		-0.499178	0.0577159
Q13057	COASY	0.392343	0.421473	0.413102	0.503525	0.405461	0.611077	0.568498	0.385301	0.485457	0.537156	0.660313	0.480222	0.33224		0.47364	0.0332465		0.480115	0.0471205		0.476628	0.0269341
Q9H9E3	COG4	-0.156201	0.230792	0.593291	-0.00123672	0.1983	0.125097	0.624736	0.0899617	0.122217	0.966298	0.582664	0.228904	0.476477		0.230683	0.109373		0.411087	0.136837		0.313946	0.0865768
Q99715	COL12A1	-0.945815	-0.612254	-1.23841	-0.913591	-0.556119	-0.337676	-1.0389	-0.757629	-0.775385	-0.812902	-0.879359	-0.840763	-0.919608		-0.806108	0.118688		-0.830941	0.0252251		-0.81757	0.0626718
Q05707	COL14A1	-0.935939	-0.825664	-1.10645	-0.675429	-0.894211	-0.525296	-0.884494	-0.593768	-0.813472	-0.60945	-0.7348	-0.625452	-0.750333		-0.835354	0.0709284		-0.687879	0.0368694		-0.767289	0.0454565
P39059	COL15A1	-0.745039	-0.839751	-0.920208	-0.540513	-0.823697	-0.577412	-0.818884	-0.901986	-0.658576	-0.819775	-0.541554	-0.82895	-0.85442		-0.752215	0.0536443		-0.767544	0.0562928		-0.75929	0.0372698
P39060	COL18A1	-1.20322	-1.24696	-1.22693	-1.0922	-0.900124	-1.28743	-1.1688	-1.2088	-1.18396	-1.19935	-1.18979	-1.31789	-1.1032		-1.16081	0.0493656		-1.2005	0.0281108		-1.17913	0.0289947
P08123	COL1A2	-1.98477	-2.74725	-2.74725	-1.69946	-2.74725	-1.91552	-1.95929	-2.31039	-1.94961	-2.02366	-2.01618	-1.99058	-1.96543		-2.25726	0.176692		-2.04264	0.0547955		-2.1582	0.0996832
Q2UY09	COL28A1	-0.368427	-0.576511	-1.1301	-1.23646	-0.185341	-1.34012	-1.698	-0.996242	-0.834197	-1.59305	-1.21473	-0.775987	-1.25114		-0.933564	0.211948		-1.11089	0.124471		-1.01541	0.125399
P02462	COL4A1	-1.55245	-1.11523	-0.869508	-1.27724	-1.4061	-1.2972	-0.911637	-1.35751	-1.19807	-1.09331	-1.27963	-1.23626	-1.24474		-1.2042	0.0953133		-1.23492	0.0358416		-1.21838	0.0520812
P08572	COL4A2	-1.24492	-1.20898	-1.29751	-1.5358	-1.45594	-2.19666	-1.19108	-1.14748	-1.19807	-1.48712	-1.80218	-1.90313	-1.90293		-1.44727	0.1341		-1.57348	0.141349		-1.50552	0.0949402
P12109	COL6A1	-1.66983	-1.65012	-1.72883	-1.80246	-1.76726	-1.80133	-1.67941	-1.60488	-1.43888	-1.82723	-1.95069	-2.02467	-1.95027		-1.72846	0.0240396		-1.79944	0.0939839		-1.76122	0.0442555
P12110	COL6A2	-1.41902	-1.57947	-1.83004	-1.71755	-1.66983	-2.02398	-2.29949	-1.45468	-1.3889	-2.19707	-2.45038	-2.19721	-2.19707		-1.79134	0.111008		-1.98089	0.181479		-1.87882	0.101957
P12111	COL6A3	-1.33318	-1.49771	-1.67014	-1.21735	-1.42659	-1.45237	-1.54412	-1.40455	-1.29003	-1.59305	-1.52534	-1.70776	-1.5667		-1.44878	0.0551862		-1.51457	0.0602322		-1.47915	0.0400908
Q5KU26	COLEC12	0.425347	0.241769	-0.28611	0.0393716	0.267152	-0.00121334	-0.315446	-0.0151749	0.0710351	-0.209317	-0.239463	0.124718	0.0307413		0.0529815	0.106235		-0.0395769	0.061518		0.0102622	0.0627991
Q8N668	COMMD1	0.749016	0.759198	0.632654	0.460029	0.8164	0.659638	0.629444	0.68104	0.653374	0.774182	0.661565	0.920678	0.888775		0.67234	0.0444086		0.763269	0.0482461		0.714307	0.033909
Q9H0A8	COMMD4	0.511591	0.586845	0.69407	0.437443	0.540539	0.677268	0.610837	0.515832	0.523236	0.65955	1.09184	0.233293	0.685581		0.579799	0.0345136		0.618221	0.115215		0.597532	0.0538892
Q86VX2	COMMD7	0.120613	0.0899659	0.226518	0.54354	-0.0048444	0.681264	0.0923295	0.168199	0.0770995	0.282797	0.518604	0.40497	0.495604		0.249912	0.0981815		0.324546	0.073213		0.284359	0.0611673
Q9P000	COMMD9	0.35154	0.449132	0.0619491	0.773456	0.41166	0.733896	0.190182	0.366142	0.339659	0.415137	0.444567	0.660081	0.743079		0.424545	0.098795		0.494777	0.0679341		0.45696	0.0601455
P21964	COMT	0.0716577	-0.101345	-0.27498	-0.411451	0.00158285	-0.490924	-0.525102	0.0825918	-0.0941273	-0.540275	-0.585448	-0.397072	-0.308839		-0.247223	0.0911851		-0.307195	0.106013		-0.274902	0.0668907
P53621	COPA	0.0847599	0.0137581	-0.128972	0.0828632	-0.04055	-0.0929554	-0.212419	-0.0151749	-0.0583865	-0.242721	-0.194203	-0.0491747	0.00496788		-0.0419307	0.0419674		-0.0924486	0.0414044		-0.0652467	0.0292697
P53618	COPB1	-0.0714197	-0.173285	-0.287059	-0.0648773	-0.0309315	-0.121031	-0.282457	-0.0449643	-0.308842	-0.191098	-0.374405	0.010993	-0.12304		-0.147294	0.0394178		-0.171893	0.0611228		-0.158647	0.0339015
P35606	COPB2	0.402325	0.395909	-0.0754277	0.130849	0.282634	-0.0409704	-0.230857	0.39488	0.377619	-0.284	-0.179357	0.0374467	-0.105542		0.123494	0.093798		0.0401744	0.117503		0.085039	0.0718865
O14579	COPE	0.0885124	0.120249	-0.0538139	0.317159	-0.0583976	0.231311	0.144864	0.311361	-0.00951159	0.0582434	0.194133	0.242244	0.615768		0.11284	0.0522242		0.235373	0.0901047		0.169394	0.0510544
Q9Y678	COPG1	-0.809759	0.363252	-0.571012	-0.217106	-0.729746	-0.11192	-0.566569	0.26573	0.146674	-0.382804	-0.514243	-0.402814	-0.308839		-0.377552	0.156532		-0.199383	0.131938		-0.29532	0.102965
Q9UBF2	COPG2	0.63574	0.614439	0.591848	0.0311182	0.485633	0.0232741	0.397144	0.722515	0.805042	0.255607	0.153522	0.110001	0.257904		0.397028	0.100432		0.384099	0.122807		0.391061	0.0749627
P61201	COPS2	0.153406	0.160593	0.13686	-0.111873	0.14961	-0.0409704	0.295917	0.208288	0.415733	0.250451	0.0962733	0.0355924	-0.00167943		0.10622	0.0519201		0.167443	0.0635764		0.134477	0.0397579
Q9UNS2	COPS3	-0.176559	-0.0954703	0.110276	0.0468004	-0.158509	0.0660465	0.207401	-0.189843	-0.145515	0.372458	0.355068	-0.268585	0.0466572		-2.06431e-06	0.0550197		0.0283735	0.114236		0.0130943	0.0578038
Q9BT78	COPS4	0.532329	0.314358	0.275091	0.314488	0.276974	0.0232741	0.124628	0.285486	0.364223	-0.0913124	0.127248	0.201042	-0.0324359		0.265877	0.0606956		0.142375	0.072695		0.208876	0.0482077
Q92905	COPS5	0.382708	0.299889	0.341475	0.490039	0.229967	0.275315	0.47945	0.242029	0.27516	0.327744	0.568732	0.137956	0.263463		0.356977	0.0376913		0.302514	0.0590253		0.331841	0.0333752
Q7L5N1	COPS6	0.365107	0.315924	0.321186	0.573104	0.34321	0.592431	0.368381	0.454838	0.331922	0.396295	0.253165	0.487006	0.267327		0.411335	0.0449386		0.365092	0.0396134		0.389992	0.0298289
Q9UBW8	COPS7A	0.447755	0.365308	0.185551	0.592681	0.54526	0.292003	0.471339	0.551666	0.426625	0.253777	0.613785	0.843913	0.770814		0.414271	0.054122		0.576763	0.089048		0.489267	0.0534824
Q9H9Q2	COPS7B	0.544637	0.312496	0.289548	0.357307	0.351574	0.154086	0.197317	0.383266	0.524914	0.141079	0.510628	0.143945	0.0136743		0.31528	0.0478731		0.286251	0.088004		0.301882	0.0460853
P61923	COPZ1	0.139923	0.0109339	0.0771808	0.239279	0.101293	0.269554	0.389942	0.260421	-0.0909173	0.416195	0.249433	0.532988	0.262496		0.175444	0.049382		0.271769	0.0858971		0.219902	0.0476194
P31146	CORO1A	0.249212	0.431775	0.123935	-0.0253749	0.239156	0.405768	0.215283	0.29692	0.293888	0.169566	0.152554	0.512544	0.324744		0.234251	0.0594852		0.291703	0.0529698		0.260767	0.0395045
Q9BR76	CORO1B	-0.309359	-0.223837	-0.343041	-0.389544	-0.131809	-0.0202628	-0.107516	-0.244611	-0.31314	-0.56694	0.219861	-0.111374	-0.0916176		-0.21791	0.051681		-0.184637	0.107067		-0.202553	0.054282
Q9ULV4	CORO1C	-0.283003	-0.0861318	-0.372945	-0.47128	-0.00227604	-0.254992	-0.196615	-0.176724	0.577605	-0.270504	-0.191393	-0.0946368	-0.0451232		-0.238177	0.0608053		-0.0334625	0.126351		-0.143694	0.0702385
Q9UQ03	CORO2B	-0.15681	-0.346308	-0.401304	-0.33179	-0.472116	-0.468105	-0.308635	-0.436643	-0.253188	-0.431059	-0.350792	-0.426346	-0.311941		-0.35501	0.0410273		-0.368328	0.0309367		-0.361157	0.0253161
Q14019	COTL1	1.59096	1.52249	0.98252	1.69034	1.85953	1.36491	1.19519	1.56647	1.23775	1.08629	1.5782	1.80862	1.67626		1.45799	0.113479		1.49227	0.112014		1.47381	0.0768394
P13073	COX4I1	-0.266734	-0.269176	-0.0754277	-0.0337822	-0.245638	-0.202787	0.0167756	-0.241155	-0.269538	-0.218178	-0.185421	-0.0272654	-0.105542		-0.153824	0.0453931		-0.174517	0.0373878		-0.163375	0.0288521
P20674	COX5A	0.283173	0.509223	0.60161	0.400915	0.437549	0.686692	0.980863	0.412353	0.4554	0.853676	0.779236	0.346356	0.689196		0.557146	0.0865151		0.589369	0.0864506		0.572019	0.0589399
P10606	COX5B	0.00196945	0.073064	0.337829	0.177998	0.0875859	0.13207	0.49988	-0.0366824	-0.0785649	0.535266	0.237237	0.20748	0.290702		0.187199	0.0656183		0.192573	0.0922602		0.189679	0.0528844
P14854	COX6B1	0.434821	0.972817	0.873738	0.40705	0.239512	0.3994	0.398343	0.689464	0.831928	0.196391	0.490997	0.516186	0.350416		0.53224	0.10433		0.512564	0.093099		0.523159	0.0678625
P09669	COX6C	-0.256428	-0.244612	-0.0138113	-0.0590116	-0.358299	-0.0929554	0.0612955	-0.234942	-0.273413	0.0680216	0.000580493	-0.407352	-0.161651		-0.137689	0.0571823		-0.168126	0.0723529		-0.151737	0.0436605
P14406	COX7A2	-0.0223032	-0.101345	0.347723	-0.00932465	-0.0182513	-0.11192	0.437961	0.0363884	-0.022136	0.445518	0.229383	0.225375	0.414261		0.0746486	0.0841525		0.221465	0.0776838		0.14241	0.0592751
P00450	CP	0.63074	0.875629	0.205633	0.683008	0.632914	0.705781	0.291463	0.611405	1.02845	0.0652148	0.357734	0.567207	0.705516		0.575024	0.090295		0.555922	0.132783		0.566208	0.0747883
P15088	CPA3	-1.3597	-0.798826	-1.31687	-1.34129	-1.0924	-1.12102	-1.41164	-1.34301	-1.37483	-1.11653	-1.46312	-1.24484	-0.730047		-1.20596	0.0820024		-1.21206	0.107891		-1.20878	0.0636374
Q96IY4	CPB2	-0.368427	-0.360138	-0.738655	-0.269296	-0.511897	-0.527239	-0.866722	-0.264863	0.0518326	-0.882426	-0.774864	-0.911309	-0.645685		-0.520339	0.0815806		-0.571219	0.157223		-0.543822	0.0812351
P22792	CPN2	0.445048	0.75944	-0.0793675	0.618138	0.508639	0.830945	-0.0944284	0.436791	0.698887	0.025572	0.332817	0.258095	0.428206		0.426916	0.141884		0.363395	0.0909743		0.397599	0.0842323
Q99829	CPNE1	-0.423771	-0.31858	-0.893197	0.0368403	-0.604089	-0.212762	-0.12996	-0.355538	-0.294972	-0.0948832	0.169917	-0.0646715	0.20149		-0.363646	0.117681		-0.0731096	0.0938084		-0.229552	0.0846699
O75131	CPNE3	-0.081744	-0.467694	-0.610691	-0.729416	-0.354141	-0.661985	-0.49701	-0.40099	-0.232578	-0.470945	-0.43016	-0.597389	-0.750333		-0.486097	0.0826692		-0.480399	0.0723153		-0.483467	0.0533509
O95741	CPNE6	-0.487272	-0.353598	0.672025	-0.0525743	-0.798841	0.116403	0.396166	-0.204769	-0.156602	0.0909937	0.0899239	-0.121889	-0.289355		-0.0725273	0.194488		-0.0986162	0.064045		-0.0845683	0.104817
Q9BRF8	CPPED1	0.660741	0.933926	0.567264	0.574271	1.28953	0.642575	0.414976	0.64644	0.650422	0.67193	0.559963	0.889027	0.796227		0.726183	0.110945		0.702335	0.0485397		0.715176	0.061472
Q9P2I0	CPSF2	-0.242554	-0.330778	-0.220455	0.0753272	-0.171513	-0.252324	-0.218889	-0.311563	-0.27678	-0.220512	-0.254658	-0.0443956	-0.271904		-0.194455	0.0485082		-0.229969	0.0390486		-0.210846	0.0308685
Q16630	CPSF6	0.0681023	0.157416	0.332408	-0.0404049	0.144788	-0.0437751	-0.217455	0.156142	0.191069	-0.0526709	-0.353741	-0.035172	-0.227281		0.0572971	0.0670344		-0.0536091	0.0864957		0.00610962	0.0538823
P50416	CPT1A	-0.00107482	-0.120134	-0.162397	-0.574956	-0.168954	-0.452958	-0.5481	-0.101384	0.0518326	-0.47634	-0.496814	-0.692047	-0.365681		-0.289796	0.0869643		-0.346739	0.112246		-0.316077	0.067277
P23786	CPT2	0.142593	0.286417	0.111926	0.241564	0.0915884	0.390324	0.200756	0.257563	0.0387187	0.156493	0.179857	0.32933	0.52981		0.20931	0.0401242		0.248629	0.0690257		0.227457	0.0371716
Q9H3G5	CPVL	-0.141676	-0.00958422	-0.422453	0.170626	-0.159091	-0.0334984	-0.646215	-0.179526	-0.250698	-0.365681	-0.834548	0.244774	0.00496788		-0.177413	0.103676		-0.230119	0.149162		-0.201739	0.0850302
P29762	CRABP1	-0.0223032	0.0137581	1.59115	0.731582	0.166992	0.444417	2.16573	-0.138053	0.688669	2.37623	1.98797	0.677241	0.830433		0.727332	0.319238		1.07041	0.38146		0.885678	0.240539
P78560	CRADD	0.626586	0.402213	0.325273	0.822104	0.645196	0.726825	0.363523	0.439621	0.446544	0.508823	0.537718	0.712452	0.6444		0.558817	0.073486		0.54826	0.0447277		0.553944	0.0429061
P43155	CRAT	-0.31	-0.205019	-0.289933	-0.822914	-0.295779	-0.389416	-0.401593	-0.258141	-0.339921	-0.330329	-0.374405	-0.483899	-0.408097		-0.387808	0.0766912		-0.365799	0.031267		-0.37765	0.0422081
P46108	CRK	0.665982	0.7237	0.927391	-0.00751289	0.738947	0.572288	0.633689	0.800065	0.665373	0.237454	0.881242	0.452195	0.197169		0.607783	0.110916		0.538917	0.117837		0.575999	0.0779788
P46109	CRKL	0.365235	0.215148	-0.0170765	0.114206	0.142373	0.0735125	-0.122219	0.219203	0.103509	-0.0983068	-0.100667	0.0580305	0.0975595		0.110168	0.0594963		0.0465548	0.0511349		0.0808083	0.0392387
Q14194	CRMP1	-0.4887	-0.513751	0.677799	-0.101471	-0.583866	-0.411745	0.905875	-0.659527	-0.0752756	0.971087	0.446485	-0.327373	-0.246528		-0.0736941	0.232251		0.0181447	0.241452		-0.031307	0.160961
Q5TZA2	CROCC	0.104347	0.105559	0.405174	0.14866	0.157918	0.341801	0.780349	0.268779	-0.120099	0.737755	0.556591	0.305253	0.318571		0.291973	0.0928736		0.344475	0.118804		0.316205	0.0713697
Q9UKG9	CROT	0.19658	0.278109	0.382315	0.212218	0.280711	0.259336	0.295917	0.186777	0.229923	0.333826	0.232202	0.310163	0.13027		0.272169	0.0230305		0.237194	0.030938		0.256027	0.0187671
Q9NQ79	CRTAC1	1.22084	0.0249249	-0.319257	0.408679	0.152341	-0.772863	-0.658644	0.349512	0.821377	-0.661795	-0.571387	-0.807934	-0.82941		0.00800341	0.258839		-0.283273	0.284048		-0.126432	0.187912
A0A140G945	CRYAA2	0.458067	-0.125624	2.48834	0.665968	0.09268	0.237452	1.808	0.231297	1.03211	2.09619	1.04119	0.463405	0.517597		0.803555	0.367582		0.896964	0.273996		0.846667	0.225822
P02511	CRYAB	0.61696	0.335389	0.0503976	0.606327	0.0723472	0.0192993	0.09906	0.323919	0.114983	-0.265559	0.0899239	0.0262715	-0.0393434		0.257111	0.0995195		0.0416991	0.0792796		0.15769	0.0695428
P05813	CRYBA1	0.574176	-0.338061	0.108313	-0.264377	0.264891	-0.506579	-0.389653	-0.0754051	1.29842	-0.312077	-0.411802	-0.223216	-0.437105		-0.0787559	0.151248		-0.0268644	0.2705		-0.054806	0.142429
P53674	CRYBB1	0.66433	-0.139533	0.325148	0.895036	0.480711	0.231311	-0.188762	0.108048	1.5656	0.408445	-0.0453482	2.04131	0.516399		0.324034	0.150621		0.765744	0.343857		0.5279	0.181347
P43320	CRYBB2	0.201316	-0.911089	-0.246073	-0.436178	-0.33974	-1.11254	-1.51598	-0.477066	0.378696	-0.832176	-0.217022	-0.204234	-0.930302		-0.622898	0.221293		-0.380351	0.195771		-0.510953	0.147558
P07315	CRYGC	0.588132	-0.131278	0.443513	0.793916	0.577328	0.549501	0.119247	0.196067	1.46475	0.343373	0.478273	0.754695	0.751356		0.420051	0.119972		0.664753	0.183786		0.53299	0.107754
P07320	CRYGD	0.566442	-0.125624	0.194915	0.720437	0.584949	0.552606	-0.0554013	0.153229	1.41168	0.373151	0.390074	0.807774	0.75971		0.348332	0.12863		0.649271	0.18331		0.487227	0.113103
P22914	CRYGS	0.824998	-0.215441	0.52481	0.604454	0.534818	0.556792	0.339473	0.169946	1.68332	0.520874	0.649871	0.629652	0.655876		0.452843	0.123794		0.718256	0.207153		0.575342	0.117632
Q9Y2S2	CRYL1	0.910598	0.750059	0.669667	0.210014	1.01205	0.632567	0.481285	0.803912	0.722648	0.628403	0.671783	0.645025	0.500169		0.666606	0.101162		0.66199	0.0414402		0.664475	0.0555511
Q14894	CRYM	-0.0549703	-0.202628	1.15507	0.335739	-0.200245	0.0400434	1.24918	-0.14381	0.83372	1.64206	1.0604	-0.0606705	0.295065		0.331741	0.235168		0.60446	0.284903		0.457611	0.178995
Q08257	CRYZ	0.501039	0.193673	0.408598	0.705611	0.712044	0.814482	0.607769	0.140811	0.274559	0.551571	0.577614	0.82428	0.712928		0.563317	0.0804571		0.513627	0.10613		0.540383	0.0629287
O75390	CS	0.519759	0.451939	0.742432	0.0118922	0.324827	0.109756	0.763761	0.396163	0.379605	0.535266	0.514133	-0.058881	-0.0848399		0.417767	0.109646		0.280241	0.114214		0.354293	0.0783393
O75534	CSDE1	-0.264249	-0.252253	-0.29765	-0.308825	-0.167519	-0.28159	-0.596409	-0.106885	-0.218263	-0.427251	-0.738394	-0.369358	-0.285616		-0.309785	0.0508779		-0.357628	0.0889659		-0.331866	0.047607
P55060	CSE1L	0.0920979	0.371579	0.299775	0.124439	0.372151	0.116403	0.040807	0.236355	0.257969	0.183	0.105153	0.156213	0.0610711		0.202464	0.0531554		0.166627	0.0308237		0.185924	0.0311452
P48729	CSNK1A1	-0.317009	-0.475419	-0.514133	-0.132245	-0.595977	-0.457005	-0.447838	-0.391995	-0.133372	-0.473046	-0.46296	-0.900323	-0.547584		-0.419947	0.0574154		-0.48488	0.101543		-0.449916	0.0543851
P67870	CSNK2B	-0.296239	-0.435859	-0.116718	-0.583733	-0.472116	-0.494357	-0.581515	-0.322022	-0.341948	-0.307775	-0.77025	-0.658913	-0.796887		-0.425791	0.063331		-0.532966	0.0954843		-0.475256	0.0554169
Q6UVK1	CSPG4	-0.418995	-0.226975	-0.848223	-0.448251	-0.100129	-0.0751355	-0.76411	-0.40099	-0.145892	-0.57792	-0.426992	-0.197929	-0.441388		-0.411688	0.115533		-0.365185	0.0663899		-0.390225	0.066978
P21291	CSRP1	-0.125103	0.0687418	-0.169256	-0.120361	0.308634	-0.0605632	-0.111646	-0.105464	0.0474992	-0.0928768	-0.060009	0.105771	0.0670385		-0.0299363	0.0633631		-0.00634019	0.0369894		-0.0190458	0.0368182
P01034	CST3	1.01979	0.532185	-0.0332653	1.09219	0.671043	0.550381	0.209311	0.695728	1.13069	0.0107117	0.434365	0.628068	0.661733		0.577376	0.152804		0.593549	0.149426		0.584841	0.102886
P04080	CSTB	0.362094	0.377394	0.0942104	-0.152599	0.28604	0.180287	0.207401	-0.0754051	0.238057	-0.0818309	0.178439	0.139196	0.048181		0.193547	0.0691471		0.0744396	0.0545721		0.138574	0.046409
Q13363	CTBP1	0.0635403	0.0314276	-0.00710093	-0.271948	0.0668718	-0.195539	-0.118659	-0.258412	-0.149076	0.025572	-0.269943	-0.214963	-0.209352		-0.0616297	0.0509975		-0.179362	0.044548		-0.115968	0.0369987
P32929	CTH	0.952234	0.84491	0.536948	0.615361	1.03044	0.834737	0.23691	1.28797	0.582736	0.23608	0.305696	0.498546	0.768917		0.721649	0.104299		0.613324	0.156036		0.671653	0.0886224
P35221	CTNNA1	-0.264131	-0.215441	-0.43584	-0.301943	-0.0309315	-0.33963	-0.527401	-0.155824	-0.418804	-0.548403	-0.426992	-0.179201	-0.296427		-0.302188	0.0602651		-0.337609	0.062942		-0.318536	0.0420198
P26232	CTNNA2	-0.167825	-0.145411	-0.0326896	-0.223704	-0.0948147	-0.27245	-0.0611351	-0.226836	-0.115559	0.0699086	-0.0757154	-0.0904181	-0.236865		-0.142576	0.032763		-0.112581	0.0460661		-0.128732	0.026753
Q9UBT7	CTNNAL1	-0.296625	-0.175594	-0.317705	-0.211317	-0.220765	-0.182473	-0.443784	-0.157369	-0.306942	-0.239351	-0.359637	-0.228124	-0.132235		-0.264038	0.0363114		-0.237276	0.0352763		-0.251686	0.0246805
P35222	CTNNB1	-0.170047	-0.0398995	-0.319257	-0.432625	-0.351719	-0.337676	-0.419288	-0.325208	-0.247271	-0.10573	-0.103906	-0.646587	-0.480656		-0.295787	0.0536079		-0.318226	0.0876309		-0.306144	0.047549
Q8WYA6	CTNNBL1	-0.512361	-0.462063	0.250969	-0.543216	-0.499597	-0.670163	0.283901	-0.409863	-0.370781	0.24598	0.0998735	-0.186825	-0.40207		-0.307504	0.150514		-0.170614	0.11516		-0.244324	0.0950669
O60716	CTNND1	-0.544373	-0.293771	-0.498598	-0.616093	-0.317664	-0.404616	-0.57462	-0.418979	-0.37014	-0.58065	-0.571387	-0.567134	-0.441388		-0.464248	0.0480437		-0.491613	0.0376602		-0.476878	0.0301611
P07858	CTSB	0.945403	0.577371	0.21421	0.80204	0.0407361	0.873006	0.391793	1.42834	0.520575	0.355394	0.561014	0.804922	0.847865		0.549223	0.13112		0.753018	0.154569		0.643282	0.100416
P07339	CTSD	1.32188	1.0034	0.451389	1.01543	1.41414	1.33938	0.644729	1.85769	1.10821	0.496289	0.818059	1.28015	1.1034		1.02719	0.139093		1.11063	0.187075		1.0657	0.109923
P08311	CTSG	-1.11165	-1.07952	-0.972139	-0.736064	-1.02449	-1.23115	-1.31704	-1.11039	-1.04714	-1.50029	-1.65383	-1.1167	-1.33663		-1.06744	0.0710366		-1.29416	0.0999893		-1.17208	0.065923
Q13616	CUL1	0.0935258	0.00302049	-0.0941041	0.20079	0.0961762	0.0944962	0.0110208	0.0546245	-0.0756218	0.137996	-0.0401983	0.166389	-0.0606888		0.0578466	0.0354582		0.0304167	0.0428869		0.0451866	0.0266043
Q13617	CUL2	-0.0373587	0.0606192	0.116206	-0.152599	0.0862844	0.0112961	0.0566494	0.0657331	0.0168856	0.287189	-0.0223169	0.25506	-0.0522389		0.0201568	0.0344337		0.0917186	0.0591304		0.0531853	0.033131
Q13618	CUL3	0.0087688	-0.129457	0.285863	0.226416	0.121106	0.106317	0.0154193	0.0904752	-0.0162572	0.269533	-0.111777	0.274411	0.199254		0.0906332	0.0531227		0.117607	0.0647065		0.103082	0.0397495
Q13620	CUL4B	0.175818	-0.0207686	0.0930937	0.359652	0.131959	0.289802	0.330933	0.276143	0.0271387	0.457424	0.272792	0.36844	0.431932		0.194356	0.0525211		0.305645	0.0638863		0.24572	0.0422382
Q93034	CUL5	1.03044	0.399034	0.159292	0.0866366	1.63589	0.118951	-0.0309304	0.726315	0.459788	0.16339	-0.10085	0.153878	0.0927484		0.485616	0.233727		0.249212	0.120478		0.376506	0.136588
O60888	CUTA	0.344393	0.785285	0.974707	0.443696	0.251262	0.924526	0.529203	0.467055	0.505555	0.814934	0.713329	0.320347	0.675564		0.607582	0.108677		0.582797	0.0747829		0.596143	0.0653298
Q9NTM9	CUTC	-0.561026	-0.35146	-0.139921	-0.276357	-0.417864	-0.508138	-0.429757	-0.320746	-0.457772	-0.180469	-0.686442	-0.284144	-0.556333		-0.383503	0.0539416		-0.414318	0.0767016		-0.397725	0.043982
P00167	CYB5A	-0.247138	-0.187307	-0.198984	-0.373383	-0.192844	0.0573978	-0.252584	-0.193787	-0.302125	-0.213989	0.0766327	-0.300662	-0.0167989		-0.199263	0.0491624		-0.158455	0.0633848		-0.180429	0.0381815
O43169	CYB5B	-0.405856	-0.487164	-0.343041	-0.427342	-0.362416	-0.235696	-0.282457	-0.328884	-0.387714	-0.0616581	-0.398194	-0.185264	-0.225389		-0.363425	0.0325445		-0.264517	0.0535892		-0.317775	0.0322494
Q9UHQ9	CYB5R1	-0.333724	-0.447907	-0.279999	-0.606692	-0.507827	-0.558494	-0.342289	-0.372021	-0.554172	-0.356425	-0.336769	-0.50397	-0.54419		-0.439562	0.0470388		-0.444591	0.0408734		-0.441883	0.0302905
P00387	CYB5R3	-1.03001	-1.10483	-0.736134	-0.896546	-0.997744	-0.925417	-0.774452	-0.820172	-1.26238	-0.85912	-0.930969	-1.02607	-1.1032		-0.923591	0.0506599		-1.00032	0.0676071		-0.959003	0.0411322
Q9BQA9	CYBC1	-0.456824	-0.608358	-0.539513	-0.340912	-0.351719	-0.206571	-0.385119	-0.423087	-0.289568	-0.341718	-0.333002	-0.218745	-0.208799		-0.412716	0.0508107		-0.302486	0.033152		-0.361841	0.0340306
P99999	CYCS	0.610869	0.766992	0.763298	0.73991	1.03349	0.869292	0.865457	0.492659	0.369743	1.21182	0.724467	1.09599	1.02968		0.807044	0.0500174		0.820727	0.140554		0.813359	0.0669071
Q7L576	CYFIP1	-0.138291	-0.105439	-0.243174	-0.638692	-0.157207	-0.256727	-0.549963	-0.180377	-0.197024	-0.465031	-0.41909	-0.556884	-0.423457		-0.298499	0.0796829		-0.373644	0.0619197		-0.333181	0.050633
Q8WWM9	CYGB	0.40406	0.45236	0.241279	0.34237	0.431676	0.382109	0.254685	0.459726	0.331473	0.442833	0.402058	0.569543	0.625468		0.358363	0.0314627		0.47185	0.0442372		0.410742	0.0301592
Q6UW02	CYP20A1	0.118053	0.0466169	-0.324636	0.745536	0.0644659	0.339084	-0.354783	0.115122	-0.00107774	-0.330329	-0.315696	1.02979	0.286834		0.0906196	0.143497		0.130774	0.205115		0.109152	0.11691
Q02318	CYP27A1	0.194879	0.266952	-0.00396755	0.179736	0.26374	0.404192	-0.0738417	0.301575	0.138787	-0.0276324	0.277196	0.259154	0.521915		0.175956	0.0623397		0.245166	0.0745495		0.207899	0.047056
Q6ZWL3	CYP4V2	0.441536	0.229769	-0.104521	0.526369	0.517434	0.80578	-0.102702	0.442096	0.632021	0.551571	0.692347	0.522444	0.799777		0.330523	0.128969		0.606709	0.0524366		0.457994	0.0811579
Q8N118	CYP4X1	-0.279755	0.100375	-0.335079	-0.95755	-0.137547	-0.870691	-1.0547	-0.151778	-0.0720974	-0.744617	-0.786841	-1.41705	-0.783816		-0.504992	0.17056		-0.659366	0.201297		-0.576242	0.126957
Q16850	CYP51A1	0.424943	0.449975	0.161918	-0.00247347	0.398679	0.607399	0.136638	0.407004	0.468579	0.438407	0.596993	0.0249976	0.162562		0.311011	0.0814643		0.349757	0.0869657		0.328894	0.0572036
O75881	CYP7B1	-0.176004	-0.0591548	-0.316939	-0.150233	-0.0756535	-0.133375	-0.373422	0.0198829	-0.180389	-0.382804	-0.190403	-0.282033	-0.0941617		-0.18354	0.0448926		-0.184985	0.0573937		-0.184207	0.0342944
Q9H0Q0	CYRIA	0.385489	0.337883	0.329612	0.494854	0.465566	0.233834	0.293912	0.333221	0.313207	0.587411	0.437126	0.602136	0.318571		0.363022	0.0350556		0.431945	0.0547297		0.394833	0.0317059
Q9NUQ9	CYRIB	0.881269	0.636087	0.180119	0.770072	0.898643	0.623296	0.222845	0.808752	0.864937	0.23088	0.262601	0.823891	0.788797		0.601762	0.111012		0.629976	0.121688		0.614784	0.0786261
P61803	DAD1	0.161828	-0.116254	-0.39517	0.19552	0.144788	0.215136	-0.489041	-0.0506889	-0.00713571	-0.165301	-0.426992	0.0906596	0.00111437		-0.0404562	0.112233		-0.0930572	0.0749509		-0.0647336	0.0672972
Q14118	DAG1	-0.208776	-0.153404	-0.539513	-0.650908	-0.219298	-0.498702	-0.532869	-0.328884	-0.17588	-0.737967	-0.521526	-0.162373	-0.471986		-0.400496	0.0755681		-0.399769	0.0905401		-0.40016	0.0558024
P14868	DARS1	0.00510462	0.188091	0.480338	-0.0431172	-4.23846e-05	-0.144565	0.0684484	0.0611774	0.0207142	0.0943931	-0.0751847	-0.0423008	-0.12476		0.0791796	0.0771032		-0.0109934	0.0343335		0.0375613	0.0446726
Q96EP5	DAZAP1	-0.00136265	-0.027128	-0.0255635	0.114445	-0.00493533	0.114188	-0.0165086	0.0173008	-0.0490835	0.0780571	-0.206691	-0.233644	-0.00167943		0.0218764	0.0241398		-0.0659566	0.051644		-0.0186619	0.0288021
P07108	DBI	1.04197	1.05988	1.026	0.998319	1.17812	1.41558	1.10251	0.935845	0.910315	1.51723	1.34016	1.29047	1.31421		1.11748	0.0544123		1.21804	0.0988687		1.16389	0.0537246
Q16643	DBN1	0.256254	0.198828	0.0703891	0.576673	0.216016	0.2389	-0.0350338	0.188796	0.113066	0.0530162	0.126023	0.430779	0.3064		0.217432	0.0718349		0.203013	0.0575284		0.210777	0.0450561
Q9UJU6	DBNL	-0.256186	-0.223837	-0.52628	-0.238164	-0.0701035	-0.421066	-0.420699	-0.264863	-0.163811	-0.374819	-0.249736	-0.0117137	-0.181708		-0.308048	0.0586294		-0.207775	0.0496575		-0.261768	0.0400985
Q8WVC6	DCAKD	0.188787	0.0750458	-0.103105	0.230342	0.0723472	0.284843	-0.111823	0.0450215	0.0877638	0.0274827	-0.0838834	-0.127847	0.105566		0.0909195	0.0589531		0.00901722	0.0385237		0.0531185	0.0368785
O15075	DCLK1	-0.28546	-0.338305	0.391767	-0.353905	-0.387557	-0.354087	0.422572	-0.33277	-0.143159	0.369246	0.0145238	-0.254538	-0.517426		-0.129282	0.139029		-0.144021	0.125943		-0.136084	0.0908778
Q8N568	DCLK2	0.092679	0.118452	0.648371	0.269782	0.0451697	-0.118709	0.473384	0.0330111	0.185944	0.63949	0.274141	0.0072839	-0.14131		0.218447	0.100235		0.166427	0.111594		0.194438	0.0718046
P07585	DCN	-1.48086	-1.145	-1.34469	-1.40421	-1.31268	-1.57524	-1.29	-1.3898	-1.35625	-1.52484	-1.61261	-1.26386	-1.35462		-1.36467	0.0526301		-1.417	0.0521746		-1.38882	0.0364137
Q96C86	DCPS	-0.081744	-0.0591548	0.21421	-0.0790275	0.105184	-0.0606147	0.156882	0.198294	-0.0337576	0.188337	0.036707	0.0937506	0.0189253		0.0279621	0.0478562		0.0837093	0.038463		0.0536916	0.0310718
Q14203	DCTN1	-0.19952	-0.25587	-0.134544	-0.355839	-0.171097	-0.226851	-0.153002	-0.207845	-0.335651	-0.171336	-0.255874	-0.16796	-0.197988		-0.213818	0.0285026		-0.222775	0.0260286		-0.217952	0.0187262
Q13561	DCTN2	-0.00569643	0.0429878	0.177616	0.307118	-0.213501	0.470596	0.285886	0.00424394	-0.137619	0.278451	0.270404	0.460117	0.5631		0.152144	0.0865324		0.239783	0.108539		0.192593	0.0666376
O75935	DCTN3	-0.247254	-0.245738	-0.021824	-0.473989	-0.34539	-0.400623	-0.127462	-0.227013	-0.211287	-0.118669	-0.179357	-0.374681	-0.358186		-0.26604	0.0592135		-0.244866	0.0413751		-0.256267	0.0358118
Q9UJW0	DCTN4	0.079207	0.395909	0.336339	-0.113427	0.107202	-0.04646	0.0763474	0.270726	-0.047916	-0.0238427	-0.0390367	-0.020999	-0.0754143		0.119303	0.0705177		0.0105863	0.0526425		0.0691258	0.0460057
Q7Z4W1	DCXR	-0.471754	-0.328076	-0.504055	-0.529402	-0.437144	-0.407115	-0.306099	-0.491781	-0.590135	-0.152636	-0.224633	-0.689213	-0.554186		-0.426235	0.0321173		-0.450431	0.0873071		-0.437402	0.0419012
O94760	DDAH1	0.120225	0.350764	0.749164	0.633118	0.0668718	0.597053	0.702204	0.340944	0.466051	1.03199	0.577614	0.39577	0.55996		0.459914	0.106118		0.562055	0.101134		0.507056	0.0722136
O95865	DDAH2	0.52584	0.53585	0.529489	0.205697	0.544473	0.397136	0.573516	0.3806	0.485457	0.566639	0.64379	0.520639	0.447809		0.473143	0.0493653		0.507489	0.0375932		0.488995	0.0308595
Q16531	DDB1	-0.118721	-0.274908	-0.0942166	-0.264423	-0.10865	-0.349127	-0.0653557	-0.378879	0.285719	-0.040929	-0.204907	-0.224035	-0.229039		-0.1822	0.04199		-0.132012	0.0943282		-0.159036	0.0473073
P39656	DDOST	-0.00107482	0.073064	-0.190204	-0.656179	-0.124388	-0.528811	-0.489041	0.178953	-0.181423	-0.555889	-0.466734	-0.292233	-0.379509		-0.273805	0.10708		-0.282806	0.106668		-0.277959	0.0726418
Q96HY6	DDRGK1	0.0303606	-0.156539	0.0232651	0.546624	-0.0523662	0.164266	0.0539369	0.031087	0.04197	0.166156	0.148082	0.342764	0.290702		0.0870782	0.085122		0.170127	0.0518331		0.125408	0.0510909
P30046	DDT	1.20319	1.15354	1.09225	1.14864	1.1991	1.47582	1.23091	1.02927	0.971469	1.59317	1.18427	1.72994	1.47621		1.21478	0.0467821		1.33072	0.127907		1.26829	0.0633546
Q92499	DDX1	-0.0738653	-0.0421091	0.236534	-0.389544	-0.249818	-0.351683	0.168685	-0.124839	-0.120099	0.0444137	-0.0291399	-0.305632	-0.268013		-0.100257	0.0924671		-0.133885	0.0549306		-0.115778	0.0539041
Q92841	DDX17	-0.431031	-0.360138	-0.118574	-1.33368	-0.475682	-1.23607	-0.155571	-0.3128	-0.326475	-0.279799	-0.465382	-0.984771	-1.07949		-0.587249	0.187246		-0.574786	0.147433		-0.581497	0.116717
Q9NUU7	DDX19A	0.669641	0.652057	0.394423	0.544874	0.835423	0.657063	0.274482	0.672692	0.583207	0.458817	0.287119	0.642193	0.585125		0.575423	0.0712598		0.538192	0.0584446		0.55824	0.0453071
Q9BUQ8	DDX23	-0.317045	-0.303885	-0.307539	-0.813685	-0.26662	-0.654321	-0.230857	-0.31118	-0.378284	-0.337014	-0.538564	-0.799223	-0.480656		-0.413422	0.0853036		-0.474153	0.0740315		-0.441452	0.055583
Q13838	DDX39B	-0.0701035	-0.0861318	0.275091	0.124439	-0.160643	0.245202	0.671245	-0.122138	-0.133372	0.516059	0.585666	0.169185	0.227049		0.142728	0.108824		0.207075	0.124489		0.172427	0.079085
O00571	DDX3X	-0.387164	-0.558488	-0.348307	-0.17052	-0.625426	-0.305548	-0.318738	-0.374178	-0.61048	-0.487379	-0.301096	-0.382226	-0.418049		-0.387742	0.0589403		-0.428901	0.0439756		-0.406738	0.0366371
Q7L014	DDX46	0.228924	-0.0650595	0.0831018	-0.228566	-0.432246	-0.13974	0.119616	0.031087	-0.181423	-0.0592176	0.00182418	-0.249777	-0.229604		-0.0619958	0.0858507		-0.114518	0.0496019		-0.086237	0.0501458
P17844	DDX5	-0.352938	-0.134716	0.399252	-0.95151	-0.440481	-0.443745	0.435602	-0.189813	-0.167241	0.33721	0.232202	-0.66905	-0.180256		-0.212648	0.187187		-0.106158	0.14653		-0.163499	0.117463
O95786	DDX58	-0.196365	-0.176283	-0.315841	-0.0293283	-0.130621	-0.341478	-0.485932	-0.179257	-0.24125	-0.265559	-0.476781	0.209049	-0.12304		-0.239407	0.0574953		-0.179473	0.0919697		-0.211745	0.050902
P26196	DDX6	-0.684632	-0.591879	-0.232631	-1.61296	-0.806343	-0.995388	-0.131526	-0.6731	-0.774714	-0.502908	-0.398194	-1.47467	-1.25706		-0.722194	0.187853		-0.846774	0.174872		-0.779692	0.125312
Q16698	DECR1	0.0669316	-0.0283737	0.0431961	-0.0358628	-0.103	0.123912	0.10434	0.0811521	0.0138933	-0.137585	0.132246	-0.16796	-0.136782		0.0244489	0.0312832		-0.0358392	0.0524119		-0.00337637	0.0294453
P35659	DEK	-0.271613	-0.260989	0.18722	-0.270547	-0.213951	-0.128821	0.265709	-0.277625	-0.358379	0.188767	-0.0167793	-0.0692455	-0.605014		-0.0989989	0.086534		-0.189713	0.114937		-0.140867	0.0687528
Q9Y315	DERA	-0.0438212	-0.0302284	-0.124039	0.138843	-0.01667	0.206325	-0.108183	-0.0043848	-0.0969743	-0.156959	-0.195908	0.128878	-0.0334584		0.00317509	0.0467969		-0.059801	0.0478579		-0.0258908	0.0333496
P17661	DES	-0.468006	-0.471293	-0.254162	-0.710994	-0.067623	-0.563885	-1.109	-0.940839	-0.965048	-0.666609	-0.96433	-0.0796628	-0.883169		-0.52071	0.125898		-0.749943	0.141732		-0.62651	0.0960145
O00273	DFFA	-0.0140209	-0.00613943	-0.11178	0.0640024	-0.0210382	0.118951	0.0123661	-0.00152798	-0.0905268	-0.0481429	0.0252802	0.141027	0.0027152		0.00604863	0.0273052		0.0048041	0.0320997		0.00547423	0.0199729
O75911	DHRS3	0.903739	0.900052	0.31425	0.796119	1.00567	1.18316	0.291463	0.975902	0.805432	0.405944	0.753306	1.06609	1.06932		0.770636	0.128954		0.845999	0.10313		0.805419	0.0814865
Q9Y394	DHRS7	-0.700314	-0.977703	-0.487884	-0.345161	-0.793838	-0.702961	-0.518989	-0.913632	-0.806066	-0.462233	-0.617275	-0.729534	-0.800102		-0.646693	0.0801354		-0.721474	0.0654194		-0.681207	0.0516502
Q6IAN0	DHRS7B	0.26805	0.308224	-0.0618255	0.669826	0.389329	0.43409	-0.0073029	0.165108	0.114983	0.0274827	0.0346144	0.341182	0.328136		0.28577	0.0960847		0.168584	0.0565654		0.231684	0.0581836
O43143	DHX15	-0.327338	-0.215441	-0.0267102	-0.481593	-0.277568	-0.224111	0.0210815	-0.291694	-0.294972	0.102053	-0.0838834	-0.321361	-0.409955		-0.218811	0.0652423		-0.216635	0.077308		-0.217807	0.0479106
Q7L2E3	DHX30	0.0113884	-0.0419644	-0.0943375	0.0892045	-0.047588	-0.0715421	-0.0611351	0.0376081	0.0345322	-0.183074	-0.00167744	0.0425375	-0.129442		-0.0308535	0.0235051		-0.0332525	0.0400233		-0.0319607	0.0213756
Q08211	DHX9	0.142722	0.126071	0.32234	0.0640024	0.116492	0.0696843	0.229208	0.055975	0.157824	0.208463	0.0879963	0.0860074	0.110251		0.152931	0.0350202		0.117753	0.0228036		0.136695	0.0213499
Q9NR28	DIABLO	0.49382	0.405642	0.187871	0.512315	0.453163	0.417788	0.087356	0.471725	0.30553	0.142707	0.00926658	0.54437	0.478898		0.365422	0.0615218		0.325416	0.0869161		0.346958	0.0500494
O60610	DIAPH1	-0.0258722	0.0902411	-0.00764826	0.271206	-0.053507	0.173634	-0.20921	0.0490834	-0.068322	-0.0356577	-0.0959431	0.141027	0.0564882		0.0341204	0.0599712		0.00777929	0.0366379		0.021963	0.0352251
Q9UBP4	DKK3	0.056742	0.193673	-0.039026	0.650122	0.195598	0.4782	0.0199449	0.0393545	1.04658	0.223883	0.48061	0.769092	0.927148		0.222179	0.0959536		0.581111	0.1636		0.38784	0.10146
P10515	DLAT	-0.224923	-0.269176	-0.156711	-0.085685	-0.206095	0.00449532	0.0178139	-0.227596	0.0137825	-0.0276324	-0.119135	-0.144605	0.0455483		-0.131469	0.0427538		-0.0766063	0.0427086		-0.106148	0.0300871
P09622	DLD	-0.0578918	0.0516524	0.25299	0.214753	0.231159	0.125775	0.269304	-0.108711	-0.0371598	0.228709	0.0517924	0.184623	0.350416		0.155392	0.0460059		0.111612	0.0707869		0.135185	0.0396629
Q12959	DLG1	0.153406	0.184251	0.369121	0.610281	0.370321	0.382109	0.41005	0.251923	0.168618	0.523418	0.473506	0.712452	0.361055		0.35422	0.0575614		0.415162	0.0803873		0.382347	0.0470284
P36957	DLST	0.340307	0.0484162	0.0101531	-0.42356	0.09268	-0.521504	-0.138406	0.405263	0.349876	-0.371296	-0.203479	-0.60914	-0.436482		-0.084559	0.114155		-0.14421	0.173465		-0.11209	0.0967922
P11532	DMD	-0.291776	-0.513751	-0.512205	-0.638692	-0.305832	-0.590882	-0.728279	-0.491781	-0.617705	-0.707898	-0.582159	-0.402814	-0.633557		-0.511631	0.0617321		-0.572652	0.0445369		-0.539795	0.03853
Q9Y485	DMXL1	-0.407611	-0.26134	-0.0179211	-0.786186	-0.459769	-0.267088	0.0230205	-0.241821	-0.186723	-0.0575053	-0.220255	-0.795964	-0.639199		-0.310985	0.104554		-0.356911	0.118741		-0.332182	0.0754866
Q8TDJ6	DMXL2	-0.360627	-0.32168	-0.0733035	-0.750287	-0.261247	-0.481124	-0.0271007	-0.276157	-0.261325	-0.0673614	-0.361049	-0.729534	-0.611813		-0.325053	0.0929265		-0.38454	0.0997925		-0.352508	0.0656756
P31689	DNAJA1	-0.314137	-0.361447	-0.298684	-0.28793	-0.470129	-0.320934	-0.133419	-0.369938	-0.425014	-0.605917	-0.279117	-0.458679	-0.355317		-0.312383	0.0378535		-0.415664	0.0456479		-0.360051	0.0317397
O60884	DNAJA2	-0.0274105	0.110021	0.241897	-0.124779	0.0842519	-0.319508	0.22687	0.274366	0.127401	0.164618	-0.00448302	0.36314	0.0582434		0.0273347	0.0759641		0.163881	0.0556022		0.090356	0.0503417
P25685	DNAJB1	-0.104003	0.202663	0.57751	-0.161444	-0.195962	-0.206641	0.151276	-0.113662	-0.0162572	0.128727	-0.0219817	-0.174209	-0.134291		0.0376283	0.109712		-0.0552789	0.0448276		-0.00525196	0.0616919
Q9UBS4	DNAJB11	-0.499216	-0.605195	-0.589292	-0.135266	-0.287863	-0.198678	-0.087863	-0.308157	-0.541617	-0.144928	-0.122467	0.119599	-0.0848399		-0.343339	0.0825092		-0.180402	0.0913866		-0.268137	0.0631565
Q8IXB1	DNAJC10	0.692755	0.354586	-0.13819	0.82897	0.46438	0.479683	0.34917	0.589186	0.572887	0.372862	0.37654	0.422636	0.408302		0.433051	0.116176		0.457069	0.0400034		0.444136	0.0628763
Q9NVH1	DNAJC11	-0.561709	-0.798826	-0.308675	-0.301943	-0.452662	-0.310324	-0.404658	-0.582442	-0.624634	-0.293683	-0.235115	-0.329371	-0.46887		-0.4484	0.0685924		-0.422352	0.0655667		-0.436378	0.0459074
O75165	DNAJC13	-0.252309	-0.353719	-0.469792	-0.417317	-0.12472	-0.443745	-0.677359	-0.272288	-0.281397	-0.616906	-0.700017	-0.426346	-0.346144		-0.39128	0.0660472		-0.440516	0.0732987		-0.414005	0.047517
Q13217	DNAJC3	0.0145997	0.0267455	-0.0861692	0.219961	-0.0808479	0.0138537	-0.177985	0.0035371	-0.0332013	0.0731926	-0.173853	0.303041	0.237019		-0.00997752	0.0474207		0.0682891	0.0722791		0.0261455	0.0416768
Q9H3Z4	DNAJC5	-0.228357	-0.225838	-0.292653	0.205697	-0.335722	-0.0771663	-0.189696	-0.228827	-0.192083	-0.118669	-0.10321	-0.308523	0.188079		-0.163391	0.068813		-0.127205	0.0701106		-0.14669	0.0474054
Q8WXX5	DNAJC9	0.227929	0.101502	0.44872	0.165583	0.219151	0.215136	0.643718	0.102665	0.138202	0.517597	0.366798	0.384445	-0.0393434		0.28882	0.0716783		0.245061	0.0858496		0.268623	0.0532939
Q05193	DNM1	-0.00569643	-0.0938961	0.447549	0.0517429	0.0159813	-0.131211	0.423918	-0.218949	0.0644672	0.296663	0.255184	0.0210256	-0.250882		0.101198	0.0896179		0.0279182	0.0937959		0.0673767	0.0629711
O00429	DNM1L	-0.0393381	-0.0512582	0.157877	-0.143569	-0.0256688	-0.0668479	0.136638	-0.117938	-0.044697	0.112834	-0.0539423	-0.0855108	-0.151849		-0.00459534	0.0417936		-0.0568505	0.0376504		-0.0287131	0.0282741
P50570	DNM2	-0.29687	-0.292159	-0.140902	-0.317195	-0.378605	-0.345872	-0.119993	-0.304416	-0.319672	-0.252663	-0.281009	-0.44691	-0.444029		-0.270228	0.0378469		-0.34145	0.0341692		-0.3031	0.0267436
Q9UQ16	DNM3	-0.252148	-0.215441	0.00274657	0.171163	-0.548654	-0.00729809	-0.134919	-0.40718	-0.189865	-0.0296025	0.0504227	-0.144605	-0.0102112		-0.14065	0.0873005		-0.12184	0.0676283		-0.131969	0.0542104
Q9ULA0	DNPEP	0.445048	0.34479	0.495572	0.251308	0.651472	0.231311	-0.0471819	0.351782	0.444309	0.201098	0.142334	0.514292	0.250891		0.338903	0.0847765		0.317451	0.0590627		0.329002	0.0511405
O43598	DNPH1	-0.0137252	-0.0180101	-0.120061	0.68118	-0.0631769	0.573913	0.279617	0.535594	-0.120099	0.481296	0.380512	0.736297	0.340274		0.188534	0.123604		0.392312	0.117216		0.282585	0.0872668
Q96N67	DOCK7	0.0814907	0.0358766	-0.350587	0.119661	0.01739	0.0818464	-0.477901	0.0340028	-0.0385732	-0.314228	-0.44758	-0.0491747	0.0860362		-0.0703175	0.0907556		-0.121586	0.0861844		-0.09398	0.0608309
Q9BZ29	DOCK9	-0.256616	-0.336953	-0.434648	-0.453039	-0.400632	-0.259796	-0.363344	-0.272458	-0.477489	-0.509163	-0.279117	-0.606072	-0.54419		-0.357861	0.0297286		-0.448082	0.0572091		-0.399501	0.0321857
O60762	DPM1	-0.965114	-0.939408	-0.843903	-1.14384	-0.802771	-1.13311	-0.80277	-0.839784	-0.905609	-0.849062	-0.84963	-1.25721	-1.0854		-0.947274	0.0547731		-0.96445	0.0697232		-0.955201	0.0418174
Q9NY33	DPP3	0.915619	-0.440577	-0.600928	0.883757	0.995269	0.953838	0.876916	-0.688793	-0.488169	0.922201	0.912001	1.24408	0.845488		0.511985	0.267664		0.457802	0.336652		0.486977	0.202842
Q9UHL4	DPP7	0.952234	0.514899	-0.101601	0.406933	0.322093	0.455515	0.239501	0.709475	0.18311	0.107879	0.34937	0.414748	0.430688		0.398511	0.119991		0.365878	0.0865809		0.383449	0.0730753
Q07507	DPT	-2.61695	-2.31059	-2.31197	-2.57145	-2.51932	-2.74725	-2.74725	-2.51859	-2.74725	-2.74725	-2.74725	-2.74725	-2.5712		-2.5464	0.0685892		-2.6798	0.0431986		-2.60797	0.0446545
Q16555	DPYSL2	-0.745039	-0.440577	0.196543	0.125923	-0.686677	-0.649019	0.0611561	-0.847874	-0.594219	0.2038	-0.312996	-0.547339	-0.418049		-0.305384	0.157914		-0.419446	0.144939		-0.358028	0.104991
Q14195	DPYSL3	-0.431031	-0.120134	0.327278	-0.353905	-0.645245	-0.414044	0.0773756	-0.430076	-0.292229	-0.173413	-0.170889	-0.418543	-0.375126		-0.222815	0.127131		-0.310046	0.0478766		-0.263075	0.0703545
O14531	DPYSL4	0.126886	-0.173285	0.265778	0.539179	0.00617015	0.228985	0.846473	-0.133568	0.233502	0.632948	0.247404	0.114318	0.232995		0.262884	0.128426		0.221266	0.101291		0.243676	0.0803082
Q9BPU6	DPYSL5	-1.30827	-1.11523	0.30535	-0.251733	-1.25995	-0.131211	0.665129	-1.27148	-0.844609	0.307158	0.163087	-0.444469	-0.511621		-0.442273	0.300387		-0.433655	0.243716		-0.438296	0.188991
Q01658	DR1	0.270521	-0.0533124	0.142026	0.55357	0.090975	0.0779057	0.200756	0.0904752	0.131496	0.0407428	0.178439	0.237164	0.162562		0.183206	0.0727574		0.140146	0.0281687		0.163332	0.040202
Q14919	DRAP1	-0.266273	-0.274789	-0.138118	-0.300783	-0.365459	-0.37656	-0.182593	-0.296351	-0.293478	-0.223606	-0.374405	-0.357545	-0.44855		-0.272082	0.0332575		-0.332323	0.0319051		-0.299885	0.0238474
Q9Y295	DRG1	-0.11559	-0.139533	0.160382	-0.164564	-0.0390497	-0.0202628	0.31105	0.0587505	-0.168022	0.3154	0.01885	-0.0946368	0.123383		-0.0010811	0.0662451		0.0422875	0.069514		0.0189352	0.046365
P55039	DRG2	0.137504	0.142982	-0.0571908	0.165583	0.0692807	0.145086	0.0832876	0.125214	0.0110142	0.0501456	0.132246	0.119599	-0.0417385		0.0980761	0.0290705		0.06608	0.0292404		0.0833087	0.0203261
P15924	DSP	-0.00569643	0.0712221	-0.26156	0.367934	-0.202073	0.0743341	-0.273975	-0.261543	-0.187084	0.0374639	-0.312996	0.300978	0.0652148		-0.0328307	0.0876642		-0.0596612	0.0959616		-0.045214	0.0620874
Q03001	DST	-0.0201821	0.040153	0.147424	-0.00123672	0.0462205	-0.171018	0.08008	0.0568165	-0.0355848	0.205813	-0.0935834	0.0159718	0.117884		0.0173486	0.037621		0.0445528	0.043914		0.0299044	0.027699
P60981	DSTN	0.454936	0.48375	0.306315	0.256724	0.596481	0.126943	0.331896	0.36901	0.402738	0.307158	0.297879	0.428455	0.182778		0.365292	0.0595034		0.331336	0.0363882		0.34962	0.0350965
Q9Y4J8	DTNA	-0.0311138	-0.125877	-0.121142	-0.094366	0.0646916	-0.131211	-0.255525	0.0322489	-0.137382	0.0192709	-0.124863	-0.0904181	0.0652148		-0.0992205	0.0372171		-0.0393214	0.0360681		-0.0715748	0.0264083
P51452	DUSP3	0.41162	0.299357	0.36639	0.0281743	0.3789	0.200596	0.345098	0.30313	0.413335	0.193029	0.303548	0.179742	0.190067		0.290019	0.050756		0.263808	0.0378586		0.277922	0.0313599
Q14204	DYNC1H1	-0.343405	-0.312611	-0.208102	-0.451476	-0.409219	-0.409773	-0.249124	-0.334473	-0.418804	-0.250524	-0.353741	-0.354558	-0.394093		-0.34053	0.0339823		-0.351032	0.0236947		-0.345377	0.0205222
O43237	DYNC1LI2	0.0370144	-0.223837	-0.186959	-0.564217	0.00510462	-0.137489	-0.105077	0.178953	-0.0980851	-0.265559	-0.251226	-0.185264	-0.471986		-0.167923	0.0751746		-0.182195	0.0881676		-0.17451	0.0549601
Q96FJ2	DYNLL2	-0.0776235	-0.116254	0.334231	-0.305994	-0.365345	-0.265002	0.190001	0.289358	-0.0807017	0.0142815	0.223902	-0.411489	-0.433005		-0.0865695	0.0990703		-0.0662758	0.125305		-0.0772032	0.0753026
Q9NP97	DYNLRB1	0.0383393	-0.0265468	-0.0631928	0.122808	0.0807774	0.0986326	-0.0392228	0.00856124	-0.0963287	0.155122	-0.0337981	0.293028	-0.0239023		0.0302278	0.0278796		0.0504469	0.0593646		0.0395597	0.0299241
O75923	DYSF	-0.32154	-0.228887	-0.389786	-0.645158	-0.163834	-0.583023	-0.64943	-0.168281	-0.258214	-0.757308	-0.617275	-0.526541	-0.528175		-0.425951	0.0759723		-0.475966	0.0906442		-0.449035	0.0564431
Q13011	ECH1	-0.447619	-0.360138	-0.522494	-0.350803	-0.256987	-0.396209	-0.491882	-0.412179	-0.459204	-0.361166	-0.39468	-0.0828878	-0.0404765		-0.403733	0.0345356		-0.291766	0.0740988		-0.352056	0.0404554
Q9NTX5	ECHDC1	0.62882	0.681141	0.3096	0.390691	0.956399	0.511439	0.47945	0.753816	0.399718	0.63858	0.466282	0.688761	0.625468		0.565363	0.0811457		0.595437	0.0552399		0.579243	0.0487682
P30084	ECHS1	0.673736	0.611003	0.349639	0.245299	0.423791	0.269554	0.614842	0.749753	0.503123	0.27688	0.689027	0.318809	0.164346		0.455409	0.0669346		0.450323	0.096365		0.453062	0.0547044
P42126	ECI1	0.376142	0.579494	0.627705	0.468361	0.481367	0.577647	1.09043	0.391979	0.487304	0.813219	1.04516	0.518734	0.692051		0.600163	0.0877932		0.658075	0.09907		0.626892	0.0634986
O75521	ECI2	-0.302732	-0.311994	-0.410202	0.277287	-0.147387	0.0926521	0.101992	-0.307166	-0.262866	-0.128937	0.271756	0.137956	0.47559		-0.100055	0.0981706		0.0310554	0.128239		-0.0395425	0.0781873
Q5VYK3	ECPAS	0.29466	0.218309	0.180608	0.347399	0.260374	0.330058	0.0822615	0.192884	0.172067	0.24598	0.169022	0.355741	0.0755817		0.24481	0.0351071		0.201879	0.0381308		0.224996	0.0254874
Q6P2E9	EDC4	-0.122199	-0.0524265	-0.256637	0.0663876	-0.0949022	0.190651	-0.342289	-0.150711	-0.0974522	-0.111993	-0.22237	-0.062627	0.105566		-0.087345	0.0684979		-0.0899312	0.0449971		-0.0885386	0.0406538
Q15075	EEA1	-0.686677	-0.558488	-0.316939	-0.896546	-0.740848	-0.925417	-0.658644	-0.574327	-0.541617	-0.676053	-0.806633	-0.835079	-0.880064		-0.683366	0.0783497		-0.718962	0.0581192		-0.699795	0.048255
P68104	EEF1A1	0.162014	0.427712	0.136183	-0.0480609	0.34763	0.310399	0.545024	0.327986	0.316983	-0.0340883	0.476529	-0.0741033	0.43617		0.2687	0.0754177		0.24158	0.0969307		0.256183	0.0579086
Q5VTE0	EEF1A1P5	-0.0205373	0.222589	0.258291	-0.129619	0.0858856	-0.0907312	0.0692657	0.0484539	-0.189865	-0.0568051	-0.0303784	-0.0424889	-0.0978299		0.0564492	0.0559728		-0.0614856	0.0322694		0.00201772	0.0364937
P24534	EEF1B2	0.110034	0.206019	0.224628	-0.105234	0.146215	-0.0350131	0.481285	0.135014	0.04197	-0.252663	0.124523	0.135161	0.134752		0.146848	0.0722716		0.0531261	0.0629358		0.103592	0.0484754
P29692	EEF1D	0.216905	0.0580629	-0.107024	0.0798515	0.0816969	0.0595251	-0.203284	-0.0294682	-0.220405	-0.154406	-0.0876223	0.133169	0.112227		0.0265334	0.0522956		-0.0410843	0.058071		-0.00467479	0.0384643
P26641	EEF1G	0.0885124	0.133631	0.277875	-0.085685	0.0798234	0.217962	0.115545	0.102058	0.0463935	0.110251	-0.0141601	-0.105099	-0.227281		0.118238	0.043539		-0.0146397	0.0536472		0.0569096	0.0378087
P13639	EEF2	0.338217	0.478867	0.330398	0.143583	0.456532	0.298027	0.351548	0.472127	0.36588	0.191495	0.337455	0.406574	0.380331		0.342453	0.0418021		0.358977	0.0383343		0.35008	0.0275447
Q12805	EFEMP1	-0.416281	-0.435859	-0.830924	0.889943	-0.686677	-1.17631	-1.0547	-0.747507	-0.261729	-1.12629	-1.01368	-0.788165	-0.783816		-0.530115	0.260319		-0.786864	0.121652		-0.648614	0.149853
Q14156	EFR3A	0.0505107	-0.0272056	-0.183984	0.0231444	0.0220977	0.539695	-0.284236	-0.0896566	0.043343	0.160604	-0.122467	-0.379133	-0.197988		0.0200031	0.0984916		-0.0975495	0.0767147		-0.034252	0.0634795
Q15029	EFTUD2	0.334025	-0.027195	0.234136	0.256724	0.122877	0.0282639	0.109544	0.165108	0.208885	0.173893	0.0167155	0.0405137	0.116227		0.151196	0.0490175		0.120224	0.031538		0.136901	0.0292922
P00533	EGFR	-0.0277922	-0.0922787	0.00992563	-0.0978308	-0.00959235	-0.0334984	-0.198076	-0.0315752	-0.0692826	-0.0440327	-0.237598	-0.171271	-0.14131		-0.0641633	0.0269863		-0.115845	0.0331516		-0.0880163	0.0215114
Q9H4M9	EHD1	-0.373334	-0.310635	-0.322193	0.146156	-0.0202735	0.121428	-0.280218	-0.214999	-0.341948	-0.180469	0.083303	0.580956	0.274727		-0.148438	0.0845834		0.0335948	0.142463		-0.0644231	0.0807184
Q9NZN4	EHD2	-0.232125	-0.13319	-0.465664	-0.52299	-0.0182513	-0.490924	-0.700239	-0.172453	-0.107618	-0.440556	-0.289014	-0.226515	-0.296427		-0.366198	0.0919307		-0.25543	0.0471345		-0.315074	0.0543754
Q9NZN3	EHD3	-0.372896	-0.299904	-0.539881	0.259404	-0.449166	-0.171018	-0.522756	-0.34408	-0.330435	-0.295074	-0.543434	0.00163231	-0.210733		-0.299459	0.105141		-0.287021	0.073051		-0.293718	0.0632905
Q9H223	EHD4	-0.190341	0.0820559	-0.452382	-0.20445	0.228924	-0.0249238	-0.396887	0.0546167	0.0941022	-0.209964	-0.0539423	0.247178	0.138503		-0.136858	0.0937128		0.0450822	0.0650432		-0.0528854	0.0621574
Q08426	EHHADH	0.67023	0.67874	-0.108575	0.470801	0.720114	0.583117	0.324247	0.704721	0.515001	0.373514	0.473506	0.595745	0.715364		0.476954	0.110698		0.562975	0.0549515		0.516656	0.063507
P41567	EIF1	0.365235	0.553934	0.752068	0.317701	0.63074	0.532102	0.630013	0.711758	0.468593	0.707956	0.539354	0.606386	0.495896		0.540256	0.0580486		0.588324	0.0428759		0.562441	0.0361744
O14602	EIF1AY	-0.0757654	-0.0692042	0.260051	-0.0434887	-0.0047306	-0.0759555	0.273993	0.111512	-0.0337576	0.260067	0.142428	-0.0164829	-0.0344476		0.0378427	0.0599377		0.0715531	0.0490694		0.0534013	0.0381286
P19525	EIF2AK2	-1.39137	-0.96611	-1.21044	0.465734	-0.841717	0.243462	-0.0326552	-1.41753	-0.882966	-0.0419125	0.133665	0.135161	0.296957		-0.533298	0.281548		-0.296104	0.282195		-0.423824	0.194477
P05198	EIF2S1	-0.161758	0.170262	0.111414	0.234735	-0.171097	0.223864	-0.0865682	0.0797951	0.0551109	-0.111993	-0.0903438	0.010993	-0.0578516		0.045836	0.0681114		-0.0190482	0.0323519		0.0158895	0.0392106
P20042	EIF2S2	0.244463	0.197904	0.341115	0.388901	0.166992	0.2957	0.66084	0.37391	0.148475	0.533429	0.673468	0.778006	0.541092		0.327988	0.0627796		0.508064	0.0911524		0.4111	0.0577107
Q2VIR3	EIF2S3B	-0.081744	0.0845893	0.286762	-0.462832	-0.352938	-0.299398	-0.414104	-0.0585815	-0.107618	-0.427251	-0.538564	-0.429908	-0.414232		-0.177095	0.106506		-0.329359	0.0802398		-0.247371	0.0690822
Q14152	EIF3A	-0.0205373	-0.105439	-0.406878	-0.324884	0.0460847	-0.157378	-0.325333	-0.0967942	-0.0652123	-0.348946	-0.339697	-0.249396	-0.316663		-0.184909	0.0647398		-0.236118	0.0512323		-0.208544	0.0410789
P55884	EIF3B	-0.387164	-0.545864	-0.201007	-0.669579	-0.54132	-0.616531	-0.411547	-0.57975	-0.538239	-0.403362	-0.530001	-0.802772	-0.714954		-0.481859	0.060513		-0.594846	0.0582987		-0.534007	0.0436333
B5ME19	EIF3CL	-0.365002	-0.186932	-0.315429	-0.321437	-0.223228	-0.372568	-0.379358	-0.322022	-0.39051	-0.356425	-0.457139	-0.364271	-0.217826		-0.309136	0.0286941		-0.351366	0.0324583		-0.328627	0.0214758
O15371	EIF3D	-0.0562834	-0.0439558	-0.0671204	-0.14643	0.0415502	0.0525288	-0.0271007	0.0128625	-0.145476	-0.00729089	-0.167141	0.196272	0.00496788		-0.0352588	0.0256184		-0.0176343	0.0535411		-0.0271244	0.0271
P60228	EIF3E	-0.084293	-0.0719336	-0.0732983	-0.242798	-0.317664	-0.140743	-0.280218	-0.0533445	-0.0980851	-0.303459	-0.287056	-0.422698	-0.308839		-0.172993	0.0397491		-0.24558	0.0574897		-0.206495	0.0342066
O00303	EIF3F	0.070537	0.0608677	-0.296916	-0.296407	-0.283003	-0.538295	-0.522756	-0.27702	-0.0503148	-0.449313	-0.35668	-0.601936	-0.41187		-0.257996	0.0928246		-0.357856	0.0757132		-0.304085	0.0602389
O15372	EIF3H	0.0756381	-0.0861318	0.0727516	-0.17052	-0.0801217	-0.0230271	-0.292612	0.00927582	0.0659955	-0.186358	-0.290422	-0.127847	-0.0578516		-0.0720034	0.0497111		-0.097868	0.0534599		-0.0839409	0.035054
Q13347	EIF3I	0.079207	0.292314	-0.00162416	-0.71674	-0.0868498	-0.778376	-0.358786	0.465821	0.283037	-0.984636	-0.669856	-1.19946	-1.07029		-0.224408	0.153922		-0.529231	0.295468		-0.365096	0.158403
Q9UBQ5	EIF3K	0.507737	0.562716	0.345151	0.309928	0.594452	0.136094	0.182847	0.441448	0.572887	0.0521743	0.0390167	-0.077312	-0.0941617		0.376989	0.0690259		0.155675	0.115001		0.274844	0.0695733
Q9Y262	EIF3L	-0.286308	-0.180275	0.0416297	-0.0164205	-0.181906	0.366747	0.172461	-0.283355	-0.283649	0.118806	0.488167	-0.0391624	-0.0219677		-0.0120102	0.0862997		-0.00352687	0.117631		-0.0080948	0.0683197
Q7L2H7	EIF3M	0.070537	0.107577	0.0971127	0.0281743	0.0279589	-0.0945535	-0.335457	-0.020325	-0.177969	-0.204318	-0.387833	-0.118012	-0.14131		-0.0140929	0.0592887		-0.174961	0.0498241		-0.0883398	0.0442688
P60842	EIF4A1	0.121813	0.155473	0.0889345	0.0626204	0.0216384	0.366747	0.0369834	0.0879866	-0.0859476	-0.0913124	-0.0588451	0.0249976	0.0871445		0.12203	0.0444387		-0.00599608	0.0341236		0.0629411	0.0330916
Q14240	EIF4A2	0.265305	0.441436	0.522677	0.216715	0.375209	0.289802	0.556202	0.335222	0.330071	0.562028	0.566199	0.460117	0.484655		0.38105	0.0495566		0.456382	0.0426882		0.415818	0.033603
P38919	EIF4A3	-0.205213	-0.226975	0.103002	-0.0611484	-0.197812	-0.0929554	0.128909	-0.0310326	-0.0807017	0.0332075	0.0913999	-0.147201	-0.168549		-0.0788847	0.0553789		-0.0504795	0.0415212		-0.0657746	0.0342627
P23588	EIF4B	0.336939	0.361563	0.319712	0.192684	0.264774	0.0595251	0.527329	0.395637	0.254997	-0.0174096	0.532793	0.498546	0.0841985		0.294646	0.0551204		0.29146	0.0915908		0.293176	0.0493097
P06730	EIF4E	-0.131313	-0.110605	0.0288006	-0.0558819	-0.0679924	-0.528811	0.0395344	-0.222759	-0.049892	-0.123868	-0.119135	-0.0828878	-0.23053		-0.118038	0.0726578		-0.138179	0.0300565		-0.127334	0.040043
Q04637	EIF4G1	0.260632	0.0966782	-0.186959	0.0653513	0.209744	0.664837	-0.298181	0.166841	0.0860451	-0.13402	0.00531132	0.210985	0.315772		0.116015	0.119243		0.108489	0.0650222		0.112541	0.0681352
P78344	EIF4G2	-0.104003	-0.105439	-0.00382825	-0.0469859	-0.0256688	0.0628503	-0.116587	0.00573336	-0.308842	0.00139404	-0.183961	-0.0491747	-0.00448804		-0.0485231	0.0248215		-0.0898897	0.0526679		-0.0676154	0.0271064
O43432	EIF4G3	-0.00305919	0.0140258	-0.250104	0.34642	-0.105345	0.142376	-0.239637	-0.143642	-0.131509	0.0582434	-0.149006	0.356726	0.34132		-0.0136177	0.0802171		0.0553554	0.0981309		0.018216	0.0606863
Q15056	EIF4H	0.125399	0.146702	0.353892	0.23681	0.0767705	-0.00247867	0.649271	0.18159	0.0414814	0.428745	0.570427	0.333289	0.173705		0.226624	0.0825933		0.288206	0.0789057		0.255046	0.0557895
P55010	EIF5	0.623564	0.441156	0.520927	0.251308	0.624887	0.368947	0.586717	0.555861	0.446915	0.52945	0.413654	0.663748	0.390887		0.488215	0.0535269		0.500086	0.0420239		0.493694	0.0333754
P63241	EIF5A	0.845956	0.48589	0.620096	0.798893	0.85209	0.722203	0.58202	0.545817	0.682251	0.634818	0.500569	0.737891	0.519833		0.701021	0.0536406		0.60353	0.0392283		0.656025	0.0356011
O60841	EIF5B	0.0215601	0.0995912	0.059724	-0.0358628	0.0841041	-0.12659	0.202391	0.0623632	0.0224572	0.0164521	0.274938	0.010993	0.0311688		0.0435596	0.0396458		0.0697287	0.0417033		0.0556377	0.0277815
P56537	EIF6	0.0648517	0.320974	0.422558	1.20323	0.54546	1.06726	0.197317	0.366455	0.143257	0.451249	0.462443	0.997689	0.694788		0.545949	0.16349		0.519314	0.12004		0.533656	0.09991
Q92556	ELMO1	-1.37893	-1.32901	-1.36476	-1.48166	-1.29277	-1.63255	-1.12332	-1.20877	-1.12488	-1.3983	-1.39372	-1.82732	-1.76825		-1.37186	0.0597572		-1.45354	0.117376		-1.40956	0.0612292
Q96JJ3	ELMO2	-0.084293	-0.186932	-0.406878	-0.301898	-0.374742	-0.171108	-0.291601	-0.081441	-0.161248	-0.420782	-0.251278	-0.193014	-0.232994		-0.259636	0.0440794		-0.223459	0.0464641		-0.242939	0.0310708
Q96EB1	ELP4	0.0703771	0.0772086	-0.180964	0.14866	0.0102974	-0.11192	-0.274954	-0.0390301	0.0599447	-0.140255	0.00219471	0.0049666	-0.0272735		-0.0373278	0.0586028		-0.023242	0.0272765		-0.0308267	0.0327384
Q8N766	EMC1	0.0263502	-0.366466	-0.381515	-0.00654665	-0.105614	-0.265002	-0.329291	-0.0473899	-0.163811	-0.213989	-0.150795	-0.0131598	-0.335311		-0.204012	0.0652933		-0.154076	0.0475326		-0.180965	0.0404218
Q15006	EMC2	0.313991	0.254984	-0.0325958	0.815707	0.329544	0.200596	-0.123364	0.192758	0.268209	-0.0748693	-0.0539423	0.485132	0.0717828		0.251266	0.114659		0.148178	0.0868661		0.203687	0.0721851
Q9Y6C2	EMILIN1	-1.45594	-1.47955	-1.55276	-1.44254	-1.45594	-1.5926	-1.54412	-1.25842	-1.46108	-1.28494	-1.76883	-1.18952	-1.50029		-1.50335	0.0222696		-1.41051	0.0869379		-1.4605	0.042018
Q9BXX0	EMILIN2	-1.06532	-1.17907	-1.10204	-0.969145	-1.06749	-1.37291	-1.23597	-1.09804	-1.09663	-1.18492	-1.46312	-1.20403	-1.32541		-1.14171	0.0503389		-1.22869	0.058123		-1.18185	0.0385824
O00423	EML1	-0.326552	-0.233288	-0.30677	-0.373383	-0.28946	-0.108084	-0.063008	-0.304522	-0.332718	-0.0737369	-0.0813613	-0.220754	0.0610711		-0.242935	0.0438883		-0.15867	0.0624223		-0.204044	0.0376162
O95834	EML2	0.358078	0.604925	0.437631	0.295066	0.367923	0.186299	-0.262808	0.432558	0.314795	-0.161979	-0.448885	-0.0254071	0.177005		0.283873	0.103256		0.0480145	0.133177		0.175015	0.0862168
Q32P44	EML3	0.163991	0.0804313	-0.287365	0.228537	0.0910297	0.14956	-0.289854	0.129957	0.0448837	-0.250524	-0.408213	0.0813186	0.0791028		0.0194757	0.0816766		-0.0539126	0.0901359		-0.0143958	0.0589067
O94919	ENDOD1	-0.1461	-0.620587	-0.539513	-0.328016	-0.256987	-0.361283	-0.78739	-0.418979	-0.531139	-0.802528	-0.674263	-0.111374	-0.491499		-0.434268	0.0847366		-0.504964	0.0966745		-0.466897	0.061919
P17813	ENG	-1.15584	-1.23104	-1.22649	-1.18056	-1.18083	-1.04422	-1.24424	-1.18245	-1.18806	-1.4374	-1.30925	-1.03362	-1.15289		-1.18046	0.0257801		-1.21728	0.0568196		-1.19745	0.0287727
Q8NFI3	ENGASE	-0.767598	-0.75892	-0.965249	-1.24318	-0.691518	-0.43834	-1.21055	-0.758267	-0.738671	-0.972389	-1.1802	-1.1488	-0.814883		-0.867908	0.109685		-0.935536	0.0798834		-0.899121	0.0675348
P06733	ENO1	0.551591	0.691815	1.63618	0.660089	0.498905	0.631094	1.98668	0.560704	0.748623	1.78472	1.66137	0.730247	0.683609		0.950907	0.226787		1.02821	0.221921		0.986586	0.153107
P09104	ENO2	0.487008	0.348847	1.43034	0.837589	0.319088	0.545678	1.67569	0.357655	0.562985	1.60611	1.28039	0.607571	0.642078		0.806321	0.204867		0.842798	0.198612		0.823156	0.137525
Q9UHY7	ENOPH1	0.778034	0.948832	0.839652	0.868331	0.887421	0.974041	1.11287	0.896146	0.785683	0.932813	1.38795	1.13422	1.06005		0.915597	0.0411607		1.03281	0.0869669		0.969696	0.0468522
Q7L5Y1	ENOSF1	0.865036	0.74549	0.247195	0.684426	0.537493	0.845127	-0.159432	0.54598	0.693458	-4.23846e-05	-0.161746	0.353723	0.589404		0.537905	0.141148		0.336796	0.141075		0.445085	0.100144
Q07075	ENPEP	-0.141569	-0.156445	-0.486805	-0.14643	-0.0707527	-0.202787	-0.503927	-0.0864076	-0.215965	-0.747648	-0.605818	0.161834	-0.128349		-0.244102	0.0665309		-0.270392	0.139534		-0.256236	0.0703577
P22413	ENPP1	-1.14603	-0.798826	-1.16792	-0.777106	-0.489779	-0.943024	-0.945534	-1.43287	-0.937358	-0.886933	-1.07067	-0.754066	-0.971426		-0.89546	0.0886019		-1.00889	0.0948514		-0.947811	0.0641104
Q13822	ENPP2	1.39961	1.09046	0.58524	1.07678	1.17274	0.647257	0.651895	1.3393	1.21124	0.379372	0.444567	0.799133	0.794385		0.946283	0.119626		0.827999	0.159012		0.89169	0.0948948
Q9Y6X5	ENPP4	0.59472	0.537099	0.0892638	0.6392	0.580322	0.567938	0.230819	0.607815	0.439651	0.130818	0.527279	1.05423	0.551571		0.462766	0.0805117		0.551894	0.121926		0.503902	0.0690547
Q6UWR7	ENPP6	-0.381769	-0.300862	-0.597101	-0.571857	-0.428206	-0.725009	-0.561276	-0.508165	-0.0310907	-0.496959	-0.708947	0.0518419	-0.268013		-0.50944	0.0550198		-0.326889	0.121402		-0.425186	0.0658748
P11171	EPB41	-0.264925	-0.343533	-0.451845	-0.692812	-0.343736	-0.200904	-0.294512	-0.324321	-0.445109	-0.354433	-0.440577	-0.750504	-0.580285		-0.370324	0.0612622		-0.482538	0.0647985		-0.422115	0.0455926
Q9H4G0	EPB41L1	0.561952	0.428641	0.777811	0.939172	0.124685	0.241116	0.885754	0.291294	0.91694	0.695598	0.892519	0.301683	0.907062		0.56559	0.120075		0.667516	0.121982		0.612633	0.0834169
O43491	EPB41L2	-0.306358	-0.529444	0.271107	-0.274433	-0.242015	-0.274824	0.309296	-0.393688	-0.361092	0.239184	0.042264	-0.10209	-0.197988		-0.149524	0.119148		-0.128902	0.0990456		-0.140006	0.0756135
Q9Y2J2	EPB41L3	-0.344186	-0.204941	-0.0204978	-0.568244	-0.388172	-0.354087	0.0566494	-0.291328	-0.275298	-0.318295	-0.170889	-0.364271	-0.331576		-0.260497	0.0828136		-0.291943	0.0273423		-0.27501	0.0448404
P16452	EPB42	0.00533669	0.00616701	0.00616231	-0.882926	0.00616544	-0.494357	-0.869132	0.00618448	0.00616982	-0.834196	-1.00519	-0.919771	-0.779701		-0.317512	0.159895		-0.587751	0.190401		-0.442238	0.123965
Q9UM22	EPDR1	-0.0412155	-0.0900905	-0.200915	-0.155065	-0.0511772	-0.342994	-0.10027	-0.0253044	-0.1043	-0.374819	-0.217022	0.0654455	-0.0272735		-0.140247	0.039899		-0.113879	0.0648905		-0.128077	0.0353943
P07099	EPHX1	-0.499216	-0.380628	-0.52628	-0.721923	-0.476901	-0.600755	-0.674382	-0.212452	-0.574227	-0.761673	-0.543434	-0.807934	-0.658184		-0.554298	0.0448932		-0.592984	0.086895		-0.572153	0.0450074
P34913	EPHX2	0.686385	0.644442	0.488053	0.604562	0.681162	0.696466	0.571952	0.709521	0.56095	0.664692	0.486313	0.677241	0.595585		0.624717	0.0286163		0.615717	0.0342214		0.620563	0.0211509
P07814	EPRS1	0.498905	0.275369	-0.0146127	0.12843	0.439678	0.155815	0.0053261	0.426353	0.411362	0.0142815	0.0366031	0.209049	0.219195		0.212701	0.0759655		0.219474	0.0719431		0.215827	0.0504972
P42566	EPS15	-0.64735	0.335389	-0.00569156	-0.186448	0.103097	-0.104437	-0.0470942	-0.0151749	0.34706	0.00655634	-0.0767787	-0.0403703	-0.0181388		-0.0789334	0.114068		0.0338589	0.0636917		-0.0268754	0.0674292
Q9UBC2	EPS15L1	-0.730679	-0.777178	-0.294276	0.422466	-0.397083	-0.0495736	-0.0271007	-0.496632	-0.732986	-0.00123797	0.0269336	0.444365	-0.0202477		-0.264775	0.159844		-0.129968	0.171383		-0.202556	0.113594
P11678	EPX	-0.200134	-0.190191	-0.248103	-0.394535	-0.263326	-0.665053	-0.651662	-0.176436	-0.178437	-0.550163	-0.435526	-0.853602	-0.445077		-0.373286	0.0778184		-0.439874	0.103462		-0.404019	0.0614877
Q9NZ08	ERAP1	-0.190341	-0.31858	-0.039026	-0.308825	-0.424503	-0.445907	-0.365806	-0.204769	-0.299126	-0.47634	-0.235115	-0.450179	-0.384546		-0.298998	0.0538226		-0.341679	0.0460633		-0.318697	0.03501
Q96RT1	ERBIN	0.391645	0.509378	0.371144	0.277287	0.381351	0.519085	0.377445	0.545386	0.418063	0.321513	0.444567	0.654733	0.295065		0.403905	0.0319433		0.446555	0.0555296		0.423589	0.0300895
P84090	ERH	-0.084293	-0.156539	0.328455	-0.198772	-0.33974	-0.285738	0.158587	-0.164625	-0.170316	-0.0451525	-0.0266266	-0.34757	-0.277913		-0.0825771	0.091741		-0.172034	0.0514209		-0.123865	0.0542233
O94905	ERLIN2	-0.570794	-0.4166	-0.401304	-0.303733	-0.314056	-0.171018	-0.195119	-0.423087	-0.497622	-0.377731	-0.195908	-0.140432	-0.161651		-0.338946	0.0521941		-0.299405	0.0620973		-0.320697	0.038825
Q7Z2K6	ERMP1	-0.0877662	-0.14108	-0.340809	-0.218635	-0.0568952	-0.063682	-0.491882	-0.127793	-0.168185	-0.324731	-0.281009	-0.121889	-0.289355		-0.200107	0.0618176		-0.218827	0.0366538		-0.208747	0.0359787
Q96HE7	ERO1A	0.118053	-0.238048	-0.0589649	-0.0453067	0.553951	0.038276	-0.18614	0.25591	-0.0292033	0.0780571	-0.126766	-0.0181776	0.103598		0.0259745	0.0993293		0.043903	0.0541613		0.0342492	0.0568075
P30040	ERP29	0.919417	0.908422	0.543173	0.761992	0.835066	0.696466	0.646402	1.27044	0.68446	0.687245	0.510628	0.751281	0.777194		0.758705	0.0527855		0.780207	0.105143		0.768629	0.0537188
Q9BS26	ERP44	0.433225	0.357975	0.0416297	-0.14643	0.415153	-0.0589529	0.0167756	0.500103	0.143257	-0.261414	-0.106946	-0.0666429	-0.0345956		0.151339	0.0919095		0.0289604	0.108167		0.0948568	0.0695305
P10768	ESD	0.697068	0.670656	1.03823	0.539982	0.516767	0.56255	0.820481	0.624899	0.773318	0.69292	1.1092	0.402312	0.333826		0.692247	0.0702774		0.656078	0.113964		0.675554	0.0620842
Q9BSJ8	ESYT1	-0.319952	-0.39125	-0.584175	-0.63556	-0.397083	-0.24952	-0.461109	-0.412179	-0.422007	-0.58993	-0.509818	-0.397072	-0.679098		-0.434093	0.0521317		-0.501684	0.0464157		-0.465289	0.0352224
A0FGR8	ESYT2	-0.507161	-0.360138	-0.465664	-0.561305	-0.481523	-0.432093	-0.391645	-0.388278	-0.503929	-0.470945	-0.362908	0.488582	-0.561472		-0.457076	0.0259789		-0.299825	0.160498		-0.384498	0.0751505
P62495	ETF1	0.214367	0.260703	0.11976	0.416405	0.264891	0.6522	0.0730557	0.237893	0.122478	0.357907	0.263437	0.625538	0.361055		0.285912	0.0740505		0.328051	0.0695325		0.305361	0.0494253
P13804	ETFA	0.445048	0.297235	0.296098	0.729241	0.550717	0.515675	0.510281	0.476475	0.552617	0.0605902	0.600349	0.646727	0.638033		0.477756	0.0572631		0.495798	0.0907283		0.486083	0.0497249
P38117	ETFB	-0.00921528	0.103669	0.231882	0.0798515	0.244903	0.257008	0.160911	0.138043	-0.135214	-0.0594565	0.126023	0.146365	0.488445		0.152716	0.0376848		0.117368	0.0883376		0.136401	0.043691
Q16134	ETFDH	0.377387	0.499938	0.0300625	0.532598	0.418512	0.443103	-0.389869	0.387344	0.493199	0.0767177	-0.0521997	0.242244	0.526808		0.273105	0.127084		0.279019	0.0950422		0.275834	0.0780128
Q01844	EWSR1	-0.906541	-0.906155	-0.348197	-1.48166	-0.849894	-1.44154	-0.043404	-0.98522	-0.936373	-0.651742	-0.538564	-1.39845	-1.47452		-0.853914	0.19866		-0.997478	0.155174		-0.920174	0.125231
Q9NV70	EXOC1	0.0297719	-0.0059463	-0.208767	-0.0431172	0.0908394	-0.00109086	-0.114338	0.00644918	-0.08997	-0.282767	-0.0117024	0.132119	-0.0731645		-0.0360926	0.037344		-0.0531726	0.0559984		-0.0439757	0.0313775
Q96KP1	EXOC2	0.105829	0.121986	-0.231028	0.20079	-0.00562002	0.349321	-0.259377	0.164432	0.0295484	-0.120017	-0.144758	0.307478	0.260164		0.0402716	0.0841981		0.082808	0.0783912		0.0599038	0.0559276
O60645	EXOC3	-0.0709055	0.0198039	-0.315926	0.00865144	0.0890897	-0.162149	-0.195119	-0.0382325	-0.110179	-0.234783	0.127961	0.0550459	0.0951444		-0.0895078	0.0537904		-0.0175071	0.0563742		-0.0562767	0.0386978
Q96A65	EXOC4	0.207856	0.100339	-0.296916	-0.085685	0.0350299	-0.182473	-0.264668	0.263061	0.101562	-0.382804	-0.284996	0.0374467	-0.0960991		-0.0695023	0.0722976		-0.0603051	0.099347		-0.0652575	0.057507
O00471	EXOC5	-0.0599639	-0.353598	-0.516941	-0.28793	-0.238684	-0.349127	-0.57462	-0.299285	-0.308842	-0.371296	-0.368491	-0.0464203	0.179581		-0.340123	0.0651042		-0.202459	0.0907502		-0.276586	0.0558337
Q9Y2D4	EXOC6B	0.201316	0.360592	0.0709502	-0.380075	0.185731	-0.379142	-0.394619	0.25739	0.267606	-0.468213	-0.351403	-0.268585	-0.582969		-0.0478923	0.123246		-0.191029	0.149845		-0.113955	0.0939776
Q9UPT5	EXOC7	-0.228974	-0.166294	-0.279999	0.214753	-0.428206	0.313906	-0.195119	-0.421263	-0.39051	-0.0948832	0.0753629	-0.0713184	0.0736789		-0.10999	0.10234		-0.138155	0.0895612		-0.12299	0.066172
P15311	EZR	0.820252	0.83038	0.197913	0.619935	0.820252	0.945435	0.575487	0.972545	0.492203	0.3154	0.738164	0.778006	1.04074		0.687093	0.0949934		0.722843	0.113415		0.703593	0.070211
Q9Y624	F11R	-0.935939	-0.727715	-0.665304	-1.32612	-0.747789	-1.24838	-1.27149	-0.893129	-0.721324	-1.16949	-1.22902	-1.3407	-1.14146		-0.988962	0.108537		-1.08252	0.0940727		-1.03214	0.0710969
P00748	F12	0.923991	1.11088	0.383674	1.37946	0.943957	1.12416	0.133508	0.908277	1.06251	0.219485	0.516772	0.781459	0.902534		0.857091	0.166785		0.731839	0.126601		0.799282	0.104386
P00488	F13A1	-0.515651	-0.558488	-0.769097	-0.0493641	-0.604089	-0.595482	-0.829532	-0.191422	-0.476797	-0.978578	-0.507758	-0.369358	0.025572		-0.560243	0.0954051		-0.41639	0.138589		-0.493849	0.0810726
P00734	F2	0.964882	1.33948	0.513679	1.13009	0.46438	1.08489	0.388281	0.925957	1.13772	0.168111	0.687028	0.381331	0.954159		0.840812	0.143163		0.709051	0.15181		0.779999	0.101536
P00740	F9	-0.878969	-0.890273	-0.991771	-0.810546	-0.766973	-0.898886	-1.00174	-0.876042	-0.810071	-1.15073	-0.796348	-1.28506	-1.11892		-0.891308	0.0325433		-1.00619	0.0838254		-0.944332	0.0437009
P05413	FABP3	0.313483	0.481605	-0.0627279	0.203956	0.494818	0.0919139	-0.264832	0.0231579	0.082827	-0.143855	-0.0139181	0.142001	0.127525		0.179745	0.106124		0.0362896	0.0435162		0.113535	0.0618267
Q01469	FABP5	0.348954	0.208644	1.11149	0.440731	0.7356	0.330058	0.763761	-0.206404	0.475807	1.12475	0.612086	0.412429	0.696308		0.562748	0.120666		0.519162	0.17762		0.542631	0.100132
O15540	FABP7	0.31597	-0.00228097	1.72552	0.784519	0.0481906	0.337338	0.953623	0.0525698	0.997078	1.75579	1.12768	0.500667	0.396945		0.594697	0.231074		0.805122	0.249686		0.691816	0.165172
Q9UNN5	FAF1	-0.549951	-0.668612	-0.607336	-0.308617	-1.01168	-0.413794	-0.170282	-0.670998	-0.834197	-0.302351	-0.269226	-0.348804	-0.300828		-0.532896	0.103448		-0.454401	0.0971775		-0.496667	0.0694609
Q96CS3	FAF2	0.591597	0.47384	0.00878279	0.876046	0.40093	0.61421	0.242004	0.481424	0.522493	0.0394435	0.209524	0.610137	0.82036		0.458202	0.105669		0.44723	0.114803		0.453138	0.0744532
P16930	FAH	0.689646	0.697848	0.603244	0.993055	0.763821	1.05971	0.462966	0.707165	0.561382	0.909773	0.64157	0.93301	0.839049		0.752898	0.0794945		0.765325	0.0618356		0.758633	0.0493952
Q6P2I3	FAHD2B	0.908661	1.12167	0.316756	1.43864	0.839584	1.04029	0.37185	0.864413	1.13303	0.582683	0.448356	1.12952	1.14377		0.862493	0.152123		0.883628	0.125264		0.872248	0.0962143
Q8IWE2	FAM114A1	0.427424	0.533735	0.0727121	0.344579	0.574852	1.15357	-0.0204556	0.59083	0.458711	0.272142	0.148082	0.350271	0.551571		0.440916	0.14576		0.395268	0.0695189		0.419848	0.0818083
Q9NRY5	FAM114A2	0.0537624	0.282256	0.239374	0.196932	0.254502	0.303016	0.203118	0.593158	0.672693	0.201042	0.223174	0.31563	0.279498		0.218994	0.0311594		0.380866	0.0820499		0.293704	0.0458116
Q9Y6X4	FAM169A	-0.27078	-0.420278	0.475768	-0.355839	-0.27457	-0.505807	0.393662	-0.180377	0.0207142	0.355882	-0.0385726	-0.48955	-0.570507		-0.136835	0.151033		-0.150402	0.1403		-0.143097	0.0996525
Q52LJ0	FAM98B	-0.11461	-0.159063	0.25299	0.437443	0.163928	0.231311	0.592033	0.0967366	0.193374	0.521	0.182113	0.143945	-0.14131		0.200576	0.102709		0.165976	0.0869401		0.184607	0.0657154
Q9Y4F1	FARP1	-0.679735	-0.259453	-0.379143	-0.665614	-0.478865	-0.760246	-0.694759	-0.378879	-0.638804	-0.731544	-0.74279	-0.601936	-0.624021		-0.559688	0.0712756		-0.619662	0.0536514		-0.587368	0.0446743
Q9Y285	FARSA	-0.27026	-0.176615	0.219265	-0.571857	-0.287335	-0.367587	0.275616	-0.265345	-0.105795	0.263463	0.078529	-0.10209	-0.164065		-0.168396	0.116953		-0.0492173	0.0774566		-0.113391	0.0716272
Q9NSD9	FARSB	0.0648517	0.193673	0.303849	0.0928138	0.163928	0.206325	0.354538	-0.0449643	-0.0773455	0.433218	0.253165	0.101528	0.184693		0.19714	0.0395645		0.141716	0.0782505		0.171559	0.0407748
P49327	FASN	0.215556	0.29927	0.0166979	0.396423	0.207856	0.361278	-0.0294222	0.31844	-0.0310907	-0.0174096	0.172469	0.349365	0.425887		0.209666	0.0617852		0.202943	0.0793176		0.206563	0.0473135
P22087	FBL	0.0332874	0.00263168	0.105518	-0.0590116	-0.0784501	0.121428	0.112182	0.0334459	-0.0167425	-0.00504072	0.0753629	-0.183196	-0.151849		0.0339409	0.0313018		-0.0413365	0.0422179		-0.00080252	0.0269056
P23142	FBLN1	-0.715703	-0.620587	-0.810018	-0.094366	-0.217296	-0.141832	-0.70411	-0.574327	-0.527445	-0.62529	-0.320359	-0.210188	-0.0689482		-0.471987	0.116097		-0.38776	0.0910046		-0.433113	0.0732693
Q9UBX5	FBLN5	-0.780906	-1.41774	-1.29751	0.198086	-1.39137	-0.904848	-1.0117	-1.28243	-1.43888	-1.02985	-1.16991	-0.629649	-1.16949		-0.943713	0.211942		-1.12003	0.11278		-1.02509	0.123222
P35555	FBN1	-1.79251	-1.91768	-1.91964	-1.66721	-1.91936	-1.69823	-1.99659	-1.9174	-2.06639	-2.12068	-2.1211	-1.95041	-1.99738		-1.84446	0.047626		-2.02889	0.0355513		-1.92958	0.039474
Q9UK22	FBXO2	0.26805	0.264993	0.128647	0.430539	0.0499171	0.286272	0.193127	0.212839	0.453715	0.133226	0.156131	0.220906	0.322101		0.231649	0.0463161		0.24982	0.0487761		0.240036	0.0322786
Q8NEZ5	FBXO22	-0.0791198	-0.152002	0.451708	-0.0164205	-0.177044	-0.12659	0.464668	-0.154578	-0.00877458	0.511947	0.219861	-0.233644	-0.268013		0.0521714	0.106671		0.0111331	0.123838		0.0332306	0.0777663
Q9Y6R7	FCGBP	0.0974965	0.227324	-0.052637	1.26399	0.187209	-0.0888382	0.298578	-0.0135068	0.0533038	-0.330329	0.121174	-0.0206404	-0.0484101		0.276161	0.173196		-0.0397347	0.0632773		0.130363	0.104464
Q8N0W3	FCSK	0.0334213	0.029916	-0.204452	0.058369	-0.0529508	0.0353617	-0.217455	0.150094	-0.0626481	-0.215398	-0.336769	-0.0946368	0.647132		-0.0453986	0.0447568		0.0146291	0.142912		-0.0176935	0.0673914
P14324	FDPS	0.470329	0.556107	0.649805	0.432933	0.540181	0.84851	0.436502	0.526058	0.338197	0.711968	0.473506	0.885511	0.668822		0.562052	0.055874		0.600677	0.0793296		0.579879	0.045625
Q96AC1	FERMT2	0.29464	0.256249	-0.208102	-0.00123672	0.413408	0.138114	-0.2675	0.284659	0.269283	-0.197523	-0.0208978	0.17062	0.112227		0.0893676	0.0977627		0.103061	0.0754922		0.0956878	0.0606056
Q86UX7	FERMT3	-0.409691	-0.179703	-0.424284	-0.389544	-0.413693	0.797544	0.141577	-0.358436	-0.619297	-0.540275	-0.167141	-0.440677	-0.389181		-0.125399	0.172454		-0.419168	0.0641058		-0.260985	0.102881
P02671	FGA	-0.70852	-0.526481	-0.696724	-0.47976	-0.409219	-0.219297	-1.23597	-0.520331	-0.503929	-0.812902	-0.98504	-0.780669	-0.0867104		-0.610853	0.122081		-0.61493	0.129606		-0.612735	0.0851071
P02675	FGB	-0.227285	-0.166294	-0.628822	-0.533035	-0.229612	-0.100819	-1.21055	-0.0679151	0.0685399	-0.916898	-0.852965	-0.665638	-0.327511		-0.442346	0.147801		-0.460398	0.168928		-0.450677	0.106658
P02679	FGG	-0.303475	-0.0445895	-0.621322	-0.5009	-0.225763	-0.0812709	-1.23084	-0.0337112	0.0955674	-0.807036	-0.847007	-0.705063	-0.0714922		-0.429737	0.155138		-0.39479	0.177583		-0.413608	0.112114
P07954	FH	0.397969	0.52123	0.386101	0.663271	0.567057	0.515675	0.679027	0.333079	0.396602	0.499084	0.619288	0.382519	0.629032		0.532904	0.0435632		0.476601	0.0516237		0.506918	0.0330013
Q13642	FHL1	-0.317009	0.295664	-0.100058	-0.268727	0.358078	0.0678111	0.0487017	0.0231579	0.0902461	0.328595	-0.0854421	0.642193	0.200163		0.0120658	0.0981142		0.199819	0.105967		0.098721	0.074035
Q9Y3D6	FIS1	-0.277568	-0.0180101	-0.0329095	0.136654	0.152341	0.133102	0.143002	-0.0399313	-0.00476136	0.211117	0.221777	0.402312	0.138503		0.0338014	0.0598612		0.154836	0.0664745		0.0896636	0.0460209
Q5T1M5	FKBP15	-0.661478	-0.683663	-0.842043	-0.214904	-0.720646	-0.558494	-0.688135	-0.621819	-0.476797	-0.670009	-0.617275	-0.491949	-0.408097		-0.624195	0.0752157		-0.547658	0.0419993		-0.58887	0.0445385
P26885	FKBP2	0.467632	0.343628	0.0676808	0.305761	0.340852	0.43409	0.459746	0.445013	0.18246	0.3903	0.360441	0.61524	0.603023		0.345627	0.0522367		0.432746	0.066363		0.385836	0.0416984
Q00688	FKBP3	0.439873	0.553487	0.567028	0.47778	0.623837	0.403218	0.666612	0.582362	0.479573	0.76805	0.544961	0.845608	0.567499		0.533119	0.0365951		0.631342	0.0581864		0.578453	0.0348058
Q02790	FKBP4	-0.0892991	-0.117084	0.249665	0.134766	-0.154285	-0.0389527	0.261396	-0.0942572	-0.117862	0.33224	0.0867126	-0.213469	-0.118341		0.0351724	0.0667559		-0.0208295	0.0811683		0.00932534	0.0503162
Q13451	FKBP5	-0.368427	-0.453533	-0.354652	-0.00751289	-0.138825	-0.0334984	-0.32056	0.42126	-0.434477	-0.0781257	-0.213047	0.173863	-0.0626486		-0.239573	0.0670205		-0.0321961	0.121882		-0.14386	0.070404
Q14318	FKBP8	-0.0116324	0.157851	-0.108588	0.239279	-0.100245	0.0910608	-0.127462	-0.0438583	-0.0450566	0.0530162	-0.229041	0.272705	0.142264		0.0200376	0.0547451		0.0250048	0.0707294		0.0223302	0.0420649
O95302	FKBP9	0.196321	0.166193	-0.250045	0.0334562	0.127262	0.00867731	-0.353722	0.19222	0.0635051	-0.285616	-0.329961	0.176668	0.0221387		-0.0102654	0.0802461		-0.026841	0.0928818		-0.0179156	0.0582961
Q13045	FLII	0.0318215	0.0574087	-0.218445	-0.0307679	0.0316592	0.00730316	-0.265874	0.0520961	-0.0245024	-0.346144	-0.281009	-0.242044	0.228996		-0.0552706	0.0496017		-0.102101	0.0913916		-0.0768848	0.0481046
P21333	FLNA	-0.614242	-0.444469	-0.651548	-0.680557	-0.636542	-0.652169	-0.719346	-0.44563	-0.604962	-0.747648	-0.667233	-0.466409	-0.645685		-0.62841	0.0331625		-0.596262	0.0483132		-0.613572	0.0276834
O75369	FLNB	0.215556	0.304725	-0.227191	-0.0749824	0.20171	-0.00729809	-0.369365	0.325412	0.0761868	-0.365681	-0.211895	0.160338	0.0755817		0.00616505	0.0942975		0.00999039	0.103464		0.00793059	0.0667301
Q14315	FLNC	-0.229323	-0.275312	-0.393438	0.0468004	-0.162005	-0.260393	-0.790411	-0.283343	-0.254677	-0.605917	-0.759005	-0.00448637	-0.341996		-0.294869	0.0970439		-0.374904	0.109853		-0.331808	0.0706318
O75955	FLOT1	0.14901	-0.146631	-0.379143	-0.155065	0.0193193	-0.155427	-0.37657	-0.0679151	-0.12475	-0.167815	-0.277115	-0.450179	0.158839		-0.149215	0.0726994		-0.154823	0.0835067		-0.151803	0.0525797
Q14254	FLOT2	-0.32477	-0.520616	-0.553129	-0.385506	-0.263002	-0.25055	-0.537557	-0.374982	-0.354595	-0.50583	-0.336769	-0.466409	-0.180256		-0.405018	0.0496933		-0.369807	0.0465881		-0.388767	0.0332854
Q8IVF7	FMNL3	-0.142537	-0.23376	-0.441063	-0.284003	-0.118518	0.0798441	-0.458488	-0.234027	-0.134954	-0.456302	-0.264937	-0.239614	-0.249195		-0.228361	0.0716717		-0.263171	0.0429503		-0.244427	0.0419863
P31513	FMO3	-0.377707	-0.182272	-0.576582	-0.353905	-0.609711	-0.553044	-0.835972	-0.308157	-0.0909173	-0.997284	-0.930969	-0.570658	-0.594264		-0.498456	0.0803009		-0.582042	0.142673		-0.537034	0.076127
Q06828	FMOD	-0.0913087	-0.216978	-0.439846	-0.214904	-0.146016	0.306486	-0.49701	-0.276009	-0.0679451	-0.164065	-0.116835	-0.315645	-0.301973		-0.185654	0.0995306		-0.207079	0.0427766		-0.195542	0.0550317
Q06787	FMR1	-0.178895	-0.279001	-0.313567	-0.260096	-0.150938	-0.296496	-0.345849	-0.241633	-0.336191	-0.32695	-0.492625	-0.118012	-0.414232		-0.260692	0.0269043		-0.321607	0.0535146		-0.288807	0.0286786
P02751	FN1	-0.957253	-0.752943	-0.945993	-0.404447	-0.766973	-0.684566	-1.10222	-0.95973	-0.346605	-1.0854	-1.11704	-0.840763	-0.710942		-0.802056	0.0859734		-0.843414	0.117095		-0.821144	0.0682802
Q9H479	FN3K	0.39724	0.407172	0.118546	0.404939	0.307016	0.181974	-0.00975477	0.332194	0.336494	0.126451	0.083303	0.386554	0.409665		0.258162	0.0622119		0.27911	0.05667		0.26783	0.0408496
Q9HA64	FN3KRP	0.414047	0.42697	0.133284	0.367934	0.433315	0.319084	-0.190975	0.36728	0.415506	0.168111	-0.106946	0.442606	0.342501		0.271951	0.0866333		0.27151	0.0852722		0.271747	0.0584722
Q96RU3	FNBP1	-0.0324389	0.267681	-0.203898	0.0465853	0.0435028	0.0647307	-0.170442	0.202427	0.242179	-0.140275	-0.0863568	0.0811162	0.0942705		0.00224585	0.0600689		0.06556	0.0623003		0.0314678	0.0424369
P49354	FNTA	0.308634	0.225488	0.191795	0.0815074	0.231159	-0.0313709	0.104936	0.295421	0.318143	-0.0389036	0.255965	0.19296	0.211559		0.158878	0.043167		0.205857	0.0526774		0.180561	0.032879
P14207	FOLR2	-0.919329	-0.940364	-0.957308	-0.983921	-0.718989	-1.27634	-0.945534	-0.976761	-0.809604	-0.92112	-0.954359	-1.34972	-1.02235		-0.963112	0.0618981		-1.00565	0.074768		-0.982746	0.0463039
O14772	FPGT	-0.205097	-0.187365	0.0988279	-0.0253749	-0.151807	0.341801	0.297277	-0.177986	-0.193667	0.207869	0.39141	-0.10209	-0.0368364		0.0240374	0.0861593		0.0147833	0.095928		0.0197663	0.0614006
Q86XX4	FRAS1	-0.443003	-0.362195	0.0786531	-0.684404	-0.410816	-0.46461	0.105491	-0.418591	-0.441001	0.139238	-0.0959431	-0.346947	-0.200929		-0.311555	0.111091		-0.227362	0.0910816		-0.272697	0.0711672
Q92765	FRZB	-0.582461	-0.520616	-0.494653	-0.568244	-0.671667	-0.742626	-0.846741	-0.688793	-0.49262	-0.780524	-0.816362	-0.174862	-0.538045		-0.63243	0.0482339		-0.581868	0.0968546		-0.609093	0.0498329
Q16658	FSCN1	0.396804	0.422452	0.632429	0.820888	0.612464	0.359992	0.739893	0.316621	0.608506	0.718721	0.72703	0.883185	0.539714		0.569275	0.0678542		0.632296	0.0791997		0.598361	0.0502803
P02794	FTH1	1.06008	0.832604	0.410375	1.64304	0.808956	1.64147	1.57681	1.48281	0.579898	1.40598	2.04159	1.68995	1.26275		1.13905	0.185045		1.4105	0.199445		1.26433	0.135626
P02792	FTL	1.14027	0.740725	0.163829	1.7306	0.660741	1.29793	0.769903	1.46597	0.694641	0.723218	1.29912	1.41619	1.49053		0.929142	0.191579		1.18161	0.15192		1.04567	0.12506
Q9C0B1	FTO	0.502925	0.54883	0.584338	0.396423	0.525168	0.446235	0.612317	0.510059	0.55443	0.609114	0.677978	0.535039	0.446751		0.516605	0.028637		0.555562	0.0327548		0.534585	0.0214136
Q96AE4	FUBP1	-0.412249	-0.366466	-0.0348877	-0.443554	-0.496479	-0.357528	-0.083886	-0.365168	-0.410952	-0.173413	-0.284996	-0.411489	-0.271904		-0.313578	0.06818		-0.319654	0.0381699		-0.316382	0.0391468
P35637	FUS	-0.833786	-0.911089	-0.0589649	-1.11025	-0.97696	-1.2566	-0.0405484	-0.931745	-0.789648	-0.628295	-0.526475	-1.25126	-1.28494		-0.741173	0.185884		-0.902061	0.12885		-0.815429	0.114156
Q9BQS8	FYCO1	0.225351	0.328384	-0.175872	0.305761	-0.0380042	0.227477	-0.295853	0.375311	0.183995	-0.0737369	-0.179357	0.159017	0.206645		0.0824634	0.0946369		0.111979	0.0826784		0.096086	0.0611872
Q13283	G3BP1	0.110351	0.0862276	-0.183568	0.493225	-0.031848	0.296721	-0.352237	-0.0423595	-0.00413538	-0.0389036	-0.339697	0.223171	-0.0689482		0.0598389	0.10742		-0.0451454	0.0732688		0.0113846	0.0660857
P11413	G6PD	-0.149343	-0.0650595	-0.178268	-0.483106	-0.233443	-0.166997	-0.0535654	-0.170315	-0.163811	-0.128937	-0.126766	-0.260231	-0.484844		-0.189969	0.0544108		-0.222484	0.0560757		-0.204976	0.0377316
P10253	GAA	0.959944	0.562716	0.359202	0.575028	0.588132	0.749623	0.452841	1.05461	0.715587	0.412683	0.576534	0.650054	0.736279		0.606783	0.0745493		0.690957	0.0870064		0.645633	0.0556669
O14976	GAK	-0.253165	-0.293385	-0.202869	-0.617518	-0.290392	-0.574476	-0.40287	-0.309164	-0.299464	-0.295074	-0.403083	-0.611473	-0.274621		-0.376382	0.0612686		-0.36548	0.052494		-0.37135	0.0392815
P51570	GALK1	-0.197446	-0.164411	-0.334515	-0.105234	-0.145974	-0.137489	-0.445049	-0.208755	-0.231456	-0.380429	-0.353741	-0.0321925	-0.241885		-0.218588	0.0470067		-0.24141	0.0506235		-0.229121	0.0331439
Q96C23	GALM	0.54855	0.764153	0.588766	0.444533	0.935204	0.6522	0.586717	0.598659	0.536768	1.06595	1.01005	1.34708	0.996015		0.645732	0.0606537		0.925753	0.124835		0.774972	0.0749082
Q14697	GANAB	-0.327338	-0.215441	-0.147206	-0.212896	-0.174629	-0.244132	-0.0930424	-0.155824	-0.335651	-0.10573	-0.032411	-0.274126	-0.301183		-0.202098	0.028203		-0.200821	0.0493471		-0.201508	0.0261243
P04406	GAPDH	1.03349	1.08599	2.14033	0.606327	1.02621	0.64845	1.70712	1.05891	1.08374	1.67626	1.56291	0.831552	0.866774		1.17828	0.210763		1.18003	0.145642		1.17908	0.126644
P41250	GARS1	0.711322	0.522967	0.631	0.290379	0.561106	0.439102	0.521537	0.660969	0.49768	0.398153	0.549871	0.169185	0.175614		0.525345	0.051106		0.408578	0.0823193		0.471453	0.0478406
P22102	GART	0.411519	0.409184	0.193226	0.6715	0.248737	1.30684	0.376335	0.209285	0.360244	0.572274	0.552708	0.5828	1.00929		0.516763	0.14368		0.547767	0.110241		0.531072	0.0889662
A0A0B4J2D5	GATD3B	0.580281	0.353654	0.289698	0.793246	0.596033	0.799372	0.828808	0.583315	0.733077	0.731567	0.935902	0.472606	0.904823		0.60587	0.0826039		0.726882	0.0731848		0.661722	0.0563058
Q04446	GBE1	-0.0565081	-0.0677107	0.0442418	-0.101471	-0.208282	-0.0289882	0.030618	-0.0540432	-0.111846	-0.111993	0.157925	-0.260231	-0.157711		-0.0554429	0.0322466		-0.0896498	0.0569454		-0.0712307	0.0304598
Q92538	GBF1	-0.0424538	-0.0889096	-0.0207212	-0.229155	-0.0461792	-0.0771663	-0.0709795	-0.147658	-0.120282	0.0731926	-0.0935834	-0.197929	-0.236865		-0.0822235	0.0260261		-0.120521	0.0441645		-0.0998992	0.0242454
P32456	GBP2	0.197246	0.391919	-0.039026	0.622859	0.179821	0.616604	0.159726	0.244624	0.216092	0.402193	0.482218	0.862736	0.807234		0.304164	0.0941655		0.502516	0.112788		0.395711	0.0751565
Q96PP9	GBP4	-0.215335	-0.25528	-0.53737	-0.094366	-0.137151	0.0138537	-0.707252	-0.23727	-0.308376	-0.644202	-0.11456	-0.017077	-0.0808075		-0.276129	0.0969398		-0.233715	0.0928434		-0.256553	0.0649998
P02774	GC	1.17274	1.58978	0.809148	1.47697	0.930874	1.31383	0.341096	1.04153	1.60779	0.413852	0.747569	1.20259	1.45076		1.09063	0.16341		1.07735	0.181361		1.0845	0.116268
P48506	GCLC	0.113462	0.236567	0.0458078	0.0716912	0.240793	0.451147	0.136638	0.229901	0.0513975	-0.00950097	0.227953	0.321973	0.581316		0.185158	0.0526163		0.23384	0.0858404		0.207627	0.0470263
Q92616	GCN1	-0.0992254	0.13226	-0.299545	0.19552	-0.119044	0.221723	-0.07549	-0.196941	-0.129072	-0.500475	-0.349181	-0.526541	0.164346		-0.00625716	0.0730379		-0.256311	0.106134		-0.121666	0.0699813
P23434	GCSH	1.19042	1.39293	1.08752	1.32713	1.39017	1.54721	1.47556	1.2958	1.09313	1.94091	1.6766	1.48479	2.04118		1.34442	0.0603122		1.58873	0.15041		1.45718	0.0810316
Q8TB36	GDAP1	-0.438939	-0.475419	0.47282	0.447512	-0.464695	0.690071	0.245102	-0.449255	-0.568723	0.329916	0.286166	0.352081	0.338051		0.0680646	0.192867		0.0480393	0.17705		0.0588221	0.126694
P31150	GDI1	0.854947	0.821211	0.836277	1.27365	1.01793	0.877325	1.31981	0.551235	0.64136	1.45076	1.088	1.43804	1.02658		1.00016	0.0805255		1.03266	0.155683		1.01516	0.0801791
P50395	GDI2	0.708944	0.804046	0.669667	0.562366	0.546996	0.6522	0.722556	0.744794	0.69668	0.459994	0.818059	0.645025	0.673618		0.666682	0.0342269		0.673028	0.049299		0.669611	0.0279931
O43681	GET3	0.442757	0.603036	0.645258	0.446436	0.541803	0.481617	0.697802	0.535586	0.528293	0.690564	0.61499	0.482747	0.655291		0.551244	0.0380136		0.584579	0.0332145		0.566629	0.0249843
P14136	GFAP	0.0155512	-0.375202	1.66425	0.478919	-0.183046	0.395787	1.83044	0.0172585	0.355838	1.83115	1.14414	0.364933	0.362917		0.546671	0.330541		0.679373	0.275964		0.607918	0.210774
Q06210	GFPT1	0.687259	0.284418	0.027237	0.354677	0.833451	0.202716	-0.142844	0.484191	0.591106	-0.102976	-0.140117	0.503835	0.457942		0.320988	0.130445		0.298997	0.134319		0.310838	0.0897816
Q9UJY5	GGA1	0.253585	0.280405	0.617259	0.413989	0.254502	0.377798	0.0336174	0.258221	0.244786	0.426916	0.351672	0.321973	-0.0689482		0.318737	0.0677547		0.25577	0.0703419		0.289675	0.0476404
A6NGU5	GGT3P	-0.240241	-0.240612	-0.457419	-0.292589	-0.0761169	-0.244132	-0.620276	-0.186514	-0.337328	-0.509163	-0.597694	0.191658	-0.352124		-0.310198	0.066731		-0.298528	0.114175		-0.304812	0.0608983
P36269	GGT5	-0.780906	-0.538105	-0.752028	-1.13241	-0.943767	-0.772863	-0.952928	-0.44563	-0.638804	-1.12159	-0.883468	-1.07791	-0.574012		-0.839001	0.0716967		-0.790235	0.113971		-0.816494	0.062699
Q8N2G8	GHDC	-0.499216	-0.380628	-0.343041	-0.583733	-0.0561517	-0.525296	-0.51307	-0.0418664	-0.51773	-0.520379	-0.601535	-0.621669	-0.430072		-0.414448	0.067696		-0.455542	0.0873231		-0.433414	0.0522991
Q9H3K2	GHITM	-0.383901	-0.356376	0.0816865	-0.382967	-0.423608	-0.337676	0.0716955	-0.301602	-0.289921	0.095422	0.0287143	-0.494567	-0.489387		-0.247306	0.0842623		-0.24189	0.102953		-0.244807	0.0628531
Q9NUV9	GIMAP4	-0.570794	-0.691796	-0.893197	-0.729416	-0.134626	-0.833777	-0.858476	-0.472271	-0.341948	-0.894858	-0.806633	-0.746631	-0.777956		-0.673155	0.099111		-0.673383	0.0882048		-0.67326	0.0643492
P17302	GJA1	0.376865	0.268307	0.128798	0.0281743	0.406911	0.429441	-0.0182071	0.392836	0.301131	-0.111993	0.201856	0.657081	0.119431		0.23147	0.0701491		0.260057	0.106228		0.244664	0.0592608
P16278	GLB1	0.345096	0.317737	0.0939307	0.647326	0.277429	0.321597	0.0963162	0.299371	0.197025	0.12841	0.122627	0.470382	0.365467		0.299919	0.0703581		0.26388	0.0568615		0.283286	0.0445133
Q92896	GLG1	-0.484763	-0.45668	-0.542825	0.378914	-0.245638	0.385033	0.101992	-0.353461	-0.617705	0.207244	0.257887	0.620955	0.503581		-0.123424	0.153851		0.103083	0.19928		-0.0188821	0.122769
Q9H4G4	GLIPR2	-0.0942472	-0.00516648	-0.164654	-0.183729	-0.208776	-0.147465	-0.255715	-0.0992465	0.0231782	-0.214741	-0.207048	-0.238232	-0.16545		-0.151393	0.0308841		-0.150257	0.0400149		-0.150869	0.0237644
Q04760	GLO1	0.893271	0.958601	1.33129	0.577465	1.06659	0.787537	1.01993	0.903144	0.954708	1.42709	0.958661	0.982871	0.816769		0.947812	0.088949		1.00721	0.0873884		0.975225	0.0605954
Q9HC38	GLOD4	0.978646	0.754088	0.426172	0.779379	0.604044	1.26201	0.931726	0.8795	0.677873	0.858023	1.02075	0.985918	0.883042		0.819438	0.102441		0.884185	0.0490826		0.849321	0.0580986
O94925	GLS	-0.0237376	0.00745978	0.07388	0.428868	-0.0518356	0.0613205	0.23208	-0.01382	-0.0581879	0.153693	0.244874	-0.11998	0.00111437		0.104005	0.0644748		0.0346156	0.0560858		0.0719791	0.0427064
P00367	GLUD1	-0.195962	-0.0861318	0.0913986	-0.0630274	-0.0887213	-0.0668479	-0.07549	-0.00745871	-0.183309	0.00611802	-0.111777	0.010993	0.0437848		-0.0692546	0.0318522		-0.0402747	0.0358212		-0.0558793	0.0231798
P15104	GLUL	0.730534	0.918106	0.866809	0.824756	0.0531931	0.934951	1.43713	0.884654	0.274559	1.57768	1.53157	0.825959	1.20243		0.823639	0.154442		1.04948	0.201034		0.927872	0.123491
Q49A26	GLYR1	-0.246999	-0.224867	-0.0105685	-0.612118	-0.147824	-0.590882	-0.304111	-0.124181	-0.205894	-0.0753954	-0.164416	-0.279728	-0.471986		-0.305339	0.0841243		-0.220267	0.0578632		-0.266075	0.0519526
O60547	GMDS	0.230227	0.349268	0.0539664	-0.0749824	0.50681	0.424225	0.188918	0.283377	0.294625	-0.13402	0.236084	0.440536	0.251858		0.239776	0.0777041		0.228743	0.0783937		0.234684	0.053009
P60983	GMFB	0.620484	0.693479	0.541245	0.579519	0.523735	0.690071	0.717447	0.61869	0.604561	0.657558	0.792858	0.946297	0.80165		0.623711	0.0296073		0.736936	0.0544528		0.675969	0.0327371
P36959	GMPR	0.81234	0.492958	-0.039026	0.458011	0.614928	0.784011	0.263118	0.539393	0.63974	0.289448	0.61713	0.77282	0.542424		0.483763	0.113185		0.566826	0.0654643		0.5221	0.0664538
P49915	GMPS	0.759153	0.67411	0.365213	0.819419	0.774819	1.02617	0.497641	0.684186	0.473389	0.448679	0.320699	0.894342	1.07609		0.70236	0.0821447		0.649565	0.118685		0.677993	0.0677002
P29992	GNA11	-1.00592	-0.877622	-0.758357	-0.583733	-0.845942	-0.712075	-0.758321	-0.85582	-1.01903	-0.777956	-0.783104	-0.601936	-0.561472		-0.791711	0.050717		-0.766553	0.0686227		-0.780099	0.04014
Q14344	GNA13	-0.766973	-0.746058	-0.198021	-0.249808	-0.54132	-0.174873	-0.0851869	-0.720233	-0.770151	0.166156	-0.179357	-0.756629	-0.688233		-0.394606	0.107718		-0.491408	0.160095		-0.439284	0.0908125
P63096	GNAI1	-0.261182	-0.290533	-0.229922	-0.380075	-0.29922	0.158992	-0.214287	-0.143611	-0.445166	-0.0673614	0.101721	-0.344133	-0.0436899		-0.216604	0.0658743		-0.15704	0.0828751		-0.189113	0.0506222
P04899	GNAI2	-0.309359	-0.353598	-0.432027	-0.555695	-0.437144	-0.601815	-0.600963	-0.331957	-0.328777	-0.728884	-0.496814	-0.574894	-0.725842		-0.470086	0.0446538		-0.531195	0.0731958		-0.49829	0.0405522
P08754	GNAI3	-0.409848	-0.385567	-0.553364	0.0201115	-0.223848	-0.149655	-0.756528	-0.325093	-0.480418	-0.350921	-0.531578	-0.165532	0.0221387		-0.351243	0.0981365		-0.305234	0.0838833		-0.330008	0.0631656
P09471	GNAO1	-0.202395	-0.246801	0.745879	0.0427225	-0.184171	0.0216761	0.761265	-0.136927	-0.1009	0.62268	0.515279	0.0731625	0.110251		0.134025	0.165343		0.180591	0.129615		0.155517	0.103131
P63092	GNAS	-0.350826	-0.487164	-0.292254	-0.669579	-0.502992	-0.521504	-0.465573	-0.273238	-0.387714	-0.389759	-0.487415	-0.437764	-0.50583		-0.469985	0.0462095		-0.41362	0.0343894		-0.44397	0.0294638
P11488	GNAT1	-0.82748	-0.944422	0.901111	-0.0720803	-0.52844	-0.164259	1.0335	-0.558189	-0.381115	0.958265	0.837393	-0.171271	-0.170577		-0.0860103	0.297466		0.0857511	0.263985		-0.00673582	0.194514
P19087	GNAT2	0.439678	-0.375202	1.03361	-0.0180641	0.272226	-0.242454	0.418859	0.153229	0.252624	0.225788	0.19614	-0.096295	-0.225277		0.218379	0.181087		0.0843683	0.0804287		0.156528	0.102199
P19086	GNAZ	0.126033	0.229405	0.370763	0.106784	0.333044	0.0486395	0.472423	0.379618	0.0922568	0.389745	0.16687	-0.284144	-0.167078		0.241013	0.0592082		0.0962114	0.113355		0.174182	0.062041
P62873	GNB1	0.321206	0.160593	1.06425	-0.114104	-0.650568	-0.0437751	1.38682	-0.0754051	0.399718	0.762027	1.03769	-0.360578	-0.304879		0.303489	0.266293		0.243095	0.23744		0.275615	0.173231
P62879	GNB2	-0.184815	0.112072	0.152989	-0.365557	-0.679735	-0.571444	-0.409899	0.0198829	-0.00713571	-0.58993	-0.332082	-0.685353	-0.304879		-0.278056	0.121416		-0.316583	0.118329		-0.295837	0.0818067
P16520	GNB3	0.453588	-0.0938961	0.654076	0.611587	0.15626	0.319084	0.832227	0.178953	0.418152	0.779414	0.619288	0.284635	0.355237		0.418989	0.120157		0.43928	0.0907907		0.428354	0.0740322
Q9HAV0	GNB4	-0.755528	-0.499919	-0.305659	-1.04033	-1.25109	-0.815398	-0.723846	-0.44065	-0.410952	-0.786318	-0.674263	-1.1377	-1.22544		-0.770252	0.119272		-0.77922	0.140112		-0.774391	0.0872176
Q9UBI6	GNG12	-0.112998	0.395909	-0.351504	-0.0125399	-0.067623	0.0717429	-0.15573	0.0466399	-0.114968	-0.268481	-0.111879	-0.107932	0.12537		-0.0332491	0.0872132		-0.0718753	0.0566754		-0.0510766	0.0519271
P63218	GNG5	-0.222634	0.224224	0.424497	-0.0889577	0.0615975	-0.174566	0.124152	0.314911	-0.0523312	0.106481	-0.0202562	0.0512914	-0.0201324		0.0497588	0.0873285		0.0633272	0.0555668		0.0560212	0.0514861
P63211	GNGT1	0.289067	0.131481	1.42928	0.437443	0.387083	0.248624	1.78404	0.179349	0.491225	1.32653	1.21728	0.228904	0.787238		0.672431	0.247094		0.705087	0.200347		0.687503	0.155496
P36915	GNL1	0.198813	0.177739	0.414871	-0.105234	0.196167	0.0258425	0.415984	0.159208	0.140008	0.651582	0.213919	0.32933	0.187128		0.189169	0.071715		0.280196	0.0790964		0.231181	0.0525299
P46926	GNPDA1	0.191071	0.350764	0.092392	0.267379	0.157918	0.565717	0.174045	0.320224	0.0542573	0.34501	0.120323	0.438575	0.553672		0.257041	0.0602271		0.305343	0.077134		0.279334	0.0465732
Q8TDQ7	GNPDA2	0.660304	0.697032	0.614958	0.338413	0.673232	0.738688	0.511562	0.697486	0.575257	0.568348	0.708781	0.574732	0.482124		0.604884	0.0520885		0.601121	0.0353442		0.603147	0.031161
P15586	GNS	0.495395	0.197075	-0.26156	0.689293	0.0232702	0.354567	0.0963162	0.997996	0.212419	0.0501456	0.265	0.724811	0.568737		0.227765	0.119542		0.469852	0.145843		0.339497	0.0956637
Q08379	GOLGA2	-0.118721	-0.116254	-0.219608	0.12843	-0.0332845	0.160326	-0.261664	-0.081441	-0.207068	-0.261414	-0.122467	0.237164	0.0695901		-0.0658249	0.0611947		-0.0609393	0.0756423		-0.06357	0.0459244
Q08378	GOLGA3	-0.0532066	-0.0560034	-0.118656	0.0484193	-0.0204746	-0.219297	-0.0239554	-0.00454584	-0.138966	0.0374639	-0.0742887	0.253676	-0.120338		-0.0633104	0.032152		-0.00783321	0.0590817		-0.0377056	0.0318329
Q14789	GOLGB1	0.492046	0.581294	0.308297	0.259404	0.456314	0.61421	0.195452	0.431058	0.544022	0.01233	1.25022	0.993733	0.523021		0.415288	0.0614851		0.625731	0.178587		0.512416	0.0898238
Q9Y3E0	GOLT1B	-0.246471	-0.121536	-0.352147	0.0913653	-0.203416	0.485253	-0.304111	-0.240262	-0.146588	-0.0652502	0.0452107	0.11597	0.510243		-0.0930089	0.110911		0.0365539	0.108212		-0.0332107	0.0768857
Q9H8Y8	GORASP2	0.162107	0.199564	0.230194	0.387689	0.0926933	0.330058	0.222692	0.156622	0.186931	0.0236391	0.0691809	0.231796	0.148496		0.232142	0.0375714		0.136111	0.0313272		0.18782	0.0275639
O14653	GOSR2	-0.281798	-0.243781	-0.233979	-0.394535	-0.308318	-0.429984	-0.538676	-0.267091	-0.291903	-0.356425	-0.526475	-0.382226	-0.28306		-0.347296	0.0422747		-0.351197	0.0395579		-0.349096	0.0279714
P17174	GOT1	0.884536	0.963309	1.19933	0.823292	1.038	0.881493	1.0951	0.778311	0.800433	1.27262	0.924173	0.92512	1.00465		0.983581	0.0507755		0.950883	0.0730743		0.96849	0.0417511
P00505	GOT2	0.423791	0.761684	0.830521	0.696384	0.99192	0.726825	0.833462	0.69316	0.569006	1.07456	0.839427	0.816909	0.98273		0.752084	0.0658109		0.829298	0.0753291		0.787721	0.0487932
Q9Y625	GPC6	-0.239563	-0.471217	-0.662065	-0.353905	-0.321818	-0.391313	-0.876118	-0.399848	-0.296131	-1.04119	-0.907998	0.275488	-0.368705		-0.473714	0.0840145		-0.456397	0.193059		-0.465722	0.0952586
Q8N335	GPD1L	0.160218	0.193673	-0.0578462	0.0368403	0.474905	0.257008	0.23208	0.125262	0.132779	-0.0276324	0.429783	0.161834	0.440167		0.185268	0.0641911		0.210365	0.0759855		0.196852	0.047252
P43304	GPD2	-0.213702	-0.266538	-0.451445	-0.218635	-0.195158	-0.283788	-0.607321	-0.215978	-0.182727	-0.575126	-0.669856	-0.394576	-0.389181		-0.319513	0.0579734		-0.404574	0.0784397		-0.358772	0.0473068
P06744	GPI	0.530566	0.698982	0.904807	0.51567	0.731807	0.639577	0.874341	0.472127	0.517326	1.0143	0.834194	0.799133	0.670814		0.699393	0.0576705		0.717982	0.0838301		0.707972	0.0474766
P80108	GPLD1	0.226075	0.363252	-0.210591	-0.134051	0.267152	-0.150711	-0.38586	0.227381	0.468593	-0.37704	-0.232859	-0.154231	-0.204838		-0.00353342	0.107821		-0.0454989	0.131781		-0.0229021	0.0806601
P51674	GPM6A	0.171314	0.13621	1.19316	-0.115041	0.316658	-0.0437751	1.2067	0.126162	0.480283	1.33976	1.32084	0.0813186	0.521915		0.409318	0.211023		0.645047	0.228668		0.518116	0.1523
Q14956	GPNMB	-0.918028	-1.37629	-1.48991	-1.23204	-1.06361	-0.984221	-1.5923	-0.385074	-1.31087	-1.41224	-1.1322	-0.900323	-0.832176		-1.23663	0.0982386		-0.99548	0.152771		-1.12533	0.0910543
P51810	GPR143	-0.0784247	-0.290393	-0.729083	-0.340054	-0.249818	-0.24147	-0.794694	0.399309	-0.255311	-0.714954	-0.496814	-0.511225	-0.408097		-0.389134	0.101178		-0.331182	0.158369		-0.362387	0.0874579
Q13098	GPS1	-0.12169	-0.167231	-0.161166	-0.277674	-0.0749557	-0.184202	-0.0944284	-0.208442	-0.128495	0.0967284	-0.211895	-0.197929	-0.116246		-0.154478	0.0254824		-0.127713	0.0479723		-0.142125	0.0251441
P07203	GPX1	0.590432	0.475267	-0.101601	0.75545	0.221027	0.790379	0.224412	0.545817	0.04197	0.141079	0.361866	0.740055	0.577631		0.422195	0.122638		0.401403	0.110321		0.412599	0.0799921
P22352	GPX3	-0.847948	-0.430266	-0.817609	-0.484771	-0.500047	-0.640424	-0.934463	-0.712767	-0.0272535	-1.05838	-0.943977	-0.450179	-0.805315		-0.665075	0.0763398		-0.666312	0.153558		-0.665646	0.0781261
P36969	GPX4	0.0615975	0.429944	-0.272563	0.450689	-0.269066	0.324861	0.625617	0.192908	-0.0879168	0.692051	0.63736	0.415877	0.876447		0.193011	0.135805		0.454454	0.145149		0.313677	0.10214
P62993	GRB2	-0.292781	-0.33797	-0.0925162	-0.336183	-0.320763	-0.417535	-0.149539	-0.241249	-0.329961	-0.159932	-0.218556	-0.422698	-0.487379		-0.278184	0.043481		-0.309962	0.0516951		-0.292851	0.0323085
Q9UBQ7	GRHPR	0.570923	0.703193	0.674844	0.587215	0.742131	0.977096	0.717447	0.687638	0.552617	0.926106	0.706876	0.920678	0.765576		0.710407	0.0507393		0.759915	0.0590213		0.733257	0.0376005
Q15835	GRK1	0.424841	0.454228	0.962944	0.62532	0.466261	0.622273	1.06524	0.306111	0.577292	0.980272	0.952565	0.375092	0.350416		0.660158	0.09683		0.590291	0.124914		0.627912	0.0750072
P57764	GSDMD	-0.301123	-0.108636	-0.279999	0.38134	-0.200245	0.0470998	-0.250193	-0.0881062	-0.0411125	-0.166468	-0.239731	-0.165532	0.105566		-0.101679	0.0924325		-0.0992308	0.0496992		-0.100549	0.0526818
P06396	GSN	0.105599	0.562716	-0.128972	0.118245	-0.143249	0.364495	0.282115	0.251923	0.314795	-0.00123797	0.427867	0.0397115	0.353936		0.16585	0.0974482		0.231166	0.0711466		0.195996	0.0601535
P00390	GSR	0.289915	0.335389	0.288728	0.327673	0.534818	0.469047	-0.0458291	0.437833	0.219642	0.501387	0.138077	0.437512	0.472754		0.314249	0.0697171		0.367867	0.0614679		0.338996	0.0457682
P48637	GSS	0.734326	0.697556	0.858445	0.596857	0.523735	0.515675	0.55322	0.399309	0.526735	0.849058	0.39263	0.622802	0.705516		0.639973	0.0483771		0.582675	0.0731504		0.613528	0.0415586
Q9Y2Q3	GSTK1	0.566442	0.743356	0.380631	0.529708	0.472051	0.526141	0.349592	0.568118	0.468593	0.557144	0.705254	0.562733	0.910571		0.509703	0.0493278		0.628736	0.0643139		0.564641	0.0417609
P28161	GSTM2	0.788771	1.11698	0.833594	0.712378	1.59096	0.85327	1.74185	0.604706	1.32892	1.20243	1.39674	0.866102	0.807234		1.09111	0.15673		1.03436	0.130491		1.06492	0.0997738
P21266	GSTM3	0.488737	0.827737	0.626	0.255699	0.676712	0.414084	0.857183	0.447817	0.845214	0.585125	0.315665	0.330632	0.401947		0.592307	0.0830435		0.487733	0.0817554		0.544042	0.058039
P46439	GSTM5	0.418746	0.731668	0.377681	0.0815074	1.3868	0.304056	0.269304	0.37764	0.882169	-0.447174	0.163087	0.529561	0.27065		0.509967	0.16386		0.295989	0.180317		0.411208	0.120124
P78417	GSTO1	0.910598	0.796451	0.656343	1.02426	0.980578	1.59277	1.27941	0.821943	0.803178	1.24393	1.69015	1.57785	1.3714		1.03434	0.11849		1.25141	0.152628		1.13453	0.0961024
P09211	GSTP1	1.30157	0.998225	0.62451	0.873555	0.838959	1.03676	0.881145	1.32972	0.976316	0.765576	0.70415	1.35599	0.898099		0.936388	0.078833		1.00497	0.11383		0.968044	0.065287
P30711	GSTT1	0.715709	0.712458	0.635586	1.16041	0.774069	0.820041	0.673098	0.719067	0.631713	1.14759	-0.247699	1.08524	0.941562		0.784482	0.0667601		0.712912	0.208906		0.75145	0.0984819
P0CG29	GSTT2	0.927212	1.17929	1.05033	0.56282	0.0193193	0.605158	0.935131	0.732819	0.73298	0.894418	0.934152	0.584507	0.601787		0.75418	0.148801		0.746777	0.059061		0.750763	0.0814444
P0CG30	GSTT2B	0.339124	0.459997	0.199768	0.628622	0.0826643	0.423195	-0.0580094	0.195535	0.553214	-0.218178	1.80882	0.612232	0.396945		0.29648	0.0893981		0.558095	0.278525		0.417226	0.135969
O43708	GSTZ1	0.507737	0.538154	0.396131	0.403324	0.620965	0.462701	0.523026	0.496504	0.499856	0.513899	0.564272	0.484586	0.468689		0.493148	0.0300301		0.504634	0.013448		0.49845	0.0167423
P78347	GTF2I	-0.490915	-0.323676	-0.453957	0.442509	-0.183417	0.175169	0.151594	-0.298295	-0.201292	-0.00950097	0.204965	0.21979	0.0695901		-0.0975277	0.135258		-0.00245709	0.0865473		-0.053649	0.0809516
O00178	GTPBP1	0.102047	0.272347	0.111414	0.155665	-0.151757	0.424225	0.23691	0.128037	0.118885	0.180072	0.266943	-0.174862	0.125899		0.164407	0.0674619		0.107496	0.0609116		0.13814	0.0447871
P43080	GUCA1A	0.52961	0.528925	1.01633	0.741112	0.537764	0.529771	0.909275	0.49327	0.607641	1.26275	0.535653	0.828762	0.447809		0.684684	0.0783017		0.695981	0.125837		0.689898	0.0685459
Q02153	GUCY1B1	-0.104809	-0.107283	-0.016838	-0.0978308	-0.0611138	-0.0589529	-0.0653557	-0.16002	-0.107891	0.0716038	-0.269943	-0.121889	-0.217826		-0.0731691	0.0123005		-0.134328	0.0480573		-0.101396	0.0237136
Q02846	GUCY2D	0.600584	0.47274	0.290356	0.844445	0.608064	0.81273	0.229208	0.571505	0.503036	0.61142	0.631941	0.627065	0.717496		0.551161	0.0897002		0.610411	0.0290127		0.578507	0.0489984
Q16774	GUK1	0.581783	0.37895	1.81704	0.700186	0.215212	0.324861	0.870369	0.402689	0.839361	0.551571	0.780801	0.402312	0.279068		0.698344	0.205263		0.542634	0.0919406		0.626477	0.116066
P46976	GYG1	0.136375	-0.0379295	0.236534	0.0536311	-0.0047306	-0.316882	0.451193	-0.183648	0.0308856	0.541092	0.296097	0.187699	-0.168549		0.0740272	0.0905687		0.117263	0.114931		0.093982	0.0691905
P13807	GYS1	-0.0308924	-0.0865028	-0.239	0.00270995	-0.00765322	-0.0530004	-0.224996	-0.000414857	-0.125939	-0.167815	-0.131612	0.100295	0.00496788		-0.0913335	0.0380048		-0.0534197	0.0425465		-0.0738348	0.0276903
P07305	H1-0	-1.51151	-1.26799	-0.635847	-1.58546	-1.18592	-1.61157	-0.644	-1.81202	-1.54903	-0.737967	-0.941766	-1.15936	-1.1032		-1.20604	0.157886		-1.21722	0.161842		-1.2112	0.108402
Q92522	H1-10	-0.720646	-0.777178	0.0760424	-0.963251	-0.772702	-0.720216	0.0892892	-0.789335	-0.701148	-0.0124528	-0.284996	-0.866564	-0.900211		-0.541237	0.164038		-0.592451	0.14735		-0.564874	0.107118
P10412	H1-4	-0.141068	-0.0250136	0.718491	0.00270995	0.0279589	-0.152042	0.750017	-0.194304	-0.354595	0.891964	0.453494	0.206848	0.366177		0.168722	0.148317		0.228264	0.185202		0.196203	0.112214
P16401	H1-5	0.0743776	0.0290694	-0.292414	0.138843	8.13423e-05	-0.123515	-0.428912	0.181707	-0.128505	-0.111993	-0.131612	0.179742	0.157756		-0.0860672	0.0784567		0.024516	0.066579		-0.0350288	0.0525638
Q6FI13	H2AC18	-0.142396	-0.143777	0.0883108	-0.260096	-0.26097	-0.144565	0.319421	-0.267323	-0.207759	-0.207686	0.219861	-0.274126	-0.0293752		-0.0777245	0.079454		-0.127735	0.0783599		-0.100806	0.0541503
Q8IUE6	H2AC21	-0.474746	-0.0793024	-0.0607114	-0.526074	-0.210782	-0.0756926	0.996742	-0.2842	-0.401056	0.598992	0.82624	-0.237464	-0.264708		-0.0615096	0.190818		0.0396339	0.216034		-0.014828	0.137804
P0C0S5	H2AZ1	-0.993528	-0.784209	-0.108575	-1.95097	-0.717962	-1.67983	-0.818884	-0.806895	-0.697128	-0.92585	-1.05908	-1.76844	-1.59305		-1.00771	0.235012		-1.14174	0.178855		-1.06957	0.146266
Q5QNW6	H2BC18	-0.928575	-0.763061	-0.634078	-1.17242	-0.903556	-1.07737	-0.422778	-0.78346	-0.66944	-1.09331	-0.480729	-1.43286	-1.18938		-0.843119	0.0977191		-0.941529	0.145742		-0.888539	0.0828023
Q8N257	H2BU1	-0.924175	-0.865829	-0.534911	-1.31252	-0.961825	-1.26325	-0.286766	-0.865098	-0.884856	-1.00265	-0.457139	-1.36747	-1.42206		-0.878468	0.139198		-0.999877	0.145982		-0.934503	0.0980825
P84243	H3-3A	-0.654926	-0.25587	-0.105271	-0.736064	-0.459572	-1.10261	1.36469	-0.167554	-0.103065	0.411349	1.35637	-0.853602	-0.649582		-0.278517	0.30054		-0.0010139	0.326508		-0.150439	0.21544
P0DPK2	H3Y1	-1.06539	-0.98096	-0.654888	-1.99817	-0.91526	-1.2692	-0.586846	-1.08994	-1.07593	-0.742213	-0.822525	-1.61227	-1.5667		-1.06724	0.178537		-1.1516	0.149437		-1.10618	0.114121
P62805	H4C1	-1.71313	-1.69886	-0.686152	-2.74725	-1.49933	-1.85403	-0.674382	-1.8465	-1.76416	-0.874724	-1.04814	-1.73987	-1.69019		-1.55331	0.271243		-1.49393	0.171121		-1.5259	0.159726
O95479	H6PD	0.203233	0.120249	-0.322193	0.0737819	-0.143249	0.111931	-0.0444838	0.0879866	-0.044697	-0.268013	-0.264937	-0.247592	-0.314228		-0.00010434	0.069014		-0.175247	0.0652009		-0.0809393	0.0522985
P46952	HAAO	0.497302	0.839068	0.31114	0.529708	0.980578	0.874683	0.00163598	0.937692	0.588305	0.120892	0.498469	0.859331	0.374697		0.576302	0.13188		0.563231	0.124355		0.570269	0.0875214
Q9P035	HACD3	0.0263502	-0.13319	-0.164654	-0.155065	0.15626	-0.0812709	-0.0611351	0.10981	-0.156602	-0.0763557	-0.161746	0.0218868	0.108309		-0.0589578	0.0436484		-0.0257829	0.050595		-0.0436463	0.0320625
Q16836	HADH	0.440629	0.511778	0.24577	0.000814514	0.174949	0.541708	0.402762	0.481365	0.262581	0.158621	0.846601	0.201042	0.160372		0.331201	0.074783		0.351764	0.110494		0.340692	0.0621473
P40939	HADHA	-0.256186	-0.0692042	-0.364055	-0.459002	-0.178018	-0.426428	-0.527401	-0.169253	-0.283649	-0.686593	-0.446191	-0.321361	-0.202361		-0.325756	0.0622021		-0.351568	0.0779363		-0.337669	0.0471547
P55084	HADHB	0.0920979	0.0137581	-0.326105	-0.444869	-0.221266	-0.598571	-1.34868	-0.138053	0.0922568	-0.773402	-0.661604	-0.429908	-0.418049		-0.404805	0.182054		-0.388127	0.131551		-0.397107	0.110712
Q16775	HAGH	0.37283	0.492958	0.869816	0.203263	0.398993	0.496871	0.859496	0.268779	0.333979	1.06932	0.77456	0.640079	0.709054		0.527747	0.0945036		0.632628	0.120874		0.576153	0.0737699
P12081	HARS1	0.332263	0.311667	0.0816707	0.733639	0.352501	0.583117	0.349592	0.497307	0.239468	0.438407	0.430761	0.761383	0.583079		0.392064	0.0791214		0.491734	0.071013		0.438066	0.0534878
P69905	HBA1	1.46782	2.48694	1.39982	1.15478	2.25954	2.16599	1.07909	2.48674	1.74072	1.90424	2.2508	1.22832	2.09619		1.71628	0.216821		1.95117	0.179505		1.82469	0.141407
P68871	HBB	1.22963	2.05124	1.18977	1.56321	1.97464	2.58731	1.90357	1.78262	1.97197	2.16638	2.58788	1.98765	2.5876		1.78562	0.187498		2.18068	0.137945		1.96796	0.127893
P02042	HBD	1.09199	1.63414	0.830521	1.25608	1.46782	1.86456	0.771841	1.37326	1.44366	1.31421	1.73027	1.3399	1.57768		1.27385	0.154173		1.46316	0.0659047		1.36123	0.0893139
P69891	HBG1	0.0537624	0.143724	0.0527268	0.411046	0.508639	1.48995	0.0773756	1.02481	0.296379	-0.00232405	0.39831	0.756936	1.19621		0.391033	0.195765		0.61172	0.187562		0.492888	0.134506
Q9UBN7	HDAC6	0.193937	0.268565	0.0420396	0.344579	0.137149	0.425744	-0.087863	0.24983	0.242149	0.269533	0.323646	0.237164	0.298969		0.189164	0.0668236		0.270215	0.0141159		0.226572	0.0371024
Q7Z4H3	HDDC2	0.969437	0.895346	0.222919	1.04556	0.775461	0.898837	0.485911	0.772994	0.582057	0.492176	0.565182	1.11388	1.06595		0.75621	0.111987		0.765373	0.109572		0.760439	0.0754123
P51858	HDGF	-0.249449	-0.0793024	0.692957	0.121321	0.11921	0.184639	0.424948	-0.180377	-0.129072	0.459569	0.146008	0.373788	0.089398		0.173475	0.117681		0.126552	0.105409		0.151818	0.0768823
Q9H0R4	HDHD2	0.986979	0.544411	0.550194	0.557556	0.927212	0.718297	0.852999	0.656271	0.71889	0.842203	0.716229	0.878141	0.701492		0.73395	0.0718129		0.752204	0.0356552		0.742375	0.0404948
Q00341	HDLBP	0.52584	0.433367	0.200967	0.613159	0.556124	0.392053	-0.0458291	0.673252	0.564387	-0.101428	0.0608244	0.588203	0.452012		0.38224	0.0876945		0.372875	0.129341		0.377918	0.0727284
Q86XA9	HEATR5A	-0.267618	-0.16957	-0.400757	0.327673	-0.261793	0.301216	-0.118026	-0.33854	-0.231979	-0.167815	0.10738	0.0279508	0.300753		-0.084125	0.108233		-0.0503749	0.097318		-0.068548	0.0707021
Q9Y5Z4	HEBP2	0.522924	0.533317	0.586059	0.569686	0.610826	1.16891	0.666612	0.475063	0.442387	0.776453	0.257887	0.786709	0.614596		0.665476	0.0858715		0.558849	0.0843685		0.616264	0.0599133
P06865	HEXA	0.795245	0.62115	0.13686	0.624244	0.491594	0.492624	0.112182	0.977185	0.628001	-0.171336	0.237957	0.545842	0.566204		0.4677	0.0966559		0.463976	0.159389		0.465981	0.0860296
P07686	HEXB	0.765721	0.651681	0.0655841	0.9954	0.237768	1.21145	0.623812	0.780314	0.444309	0.676301	0.905115	1.27282	1.24983		0.650202	0.151192		0.888116	0.133239		0.760009	0.103637
Q93099	HGD	1.03538	1.13347	0.454914	1.05789	1.01818	0.95193	0.0674728	1.01874	1.14539	0.172728	0.582664	0.84924	1.02044		0.817033	0.150985		0.798201	0.148195		0.808342	0.101824
O14964	HGS	-0.373334	-0.146631	-0.421542	-0.13955	-0.102854	-0.349127	-0.640976	0.153229	-0.247271	-0.310489	-0.719746	-0.305632	-0.353655		-0.310574	0.073384		-0.297261	0.113631		-0.304429	0.0627424
P31937	HIBADH	0.438424	0.683653	0.469152	0.20242	0.352717	0.346678	0.341763	0.763906	0.4639	0.0501456	0.396428	0.286096	0.268905		0.404973	0.0564955		0.371564	0.0973362		0.389553	0.052004
Q6NVY1	HIBCH	0.633567	0.199257	0.0313025	0.143583	0.540181	0.221723	0.0093054	0.237893	0.186818	0.329916	0.16687	0.476095	0.587411		0.254131	0.0915047		0.330834	0.0690885		0.289533	0.057394
Q9Y241	HIGD1A	-0.263977	-0.378212	-0.29197	-0.680557	-0.356837	-0.72282	-0.250193	-0.346554	-0.477008	-0.274893	-0.158937	-0.33112	-0.835764		-0.420652	0.0747841		-0.404046	0.0961052		-0.412988	0.0573378
P49773	HINT1	0.779222	0.548505	0.715295	0.409244	0.336568	0.518722	0.700938	0.499043	0.656235	0.635933	0.650494	0.54418	0.536517		0.572642	0.0627552		0.587067	0.0278913		0.5793	0.0348453
O00291	HIP1	-0.230384	0.0231529	-0.224819	0.354677	-0.233443	0.180287	-0.385206	0.0942388	-0.044697	-0.0219988	-0.102874	0.114318	0.697879		-0.0736764	0.10087		0.122811	0.119938		0.0170101	0.0794058
P19367	HK1	0.232023	0.238688	0.846129	0.404119	0.0370144	0.307839	0.944933	0.206971	0.300197	0.861461	0.671783	0.324621	0.232995		0.430107	0.127629		0.433005	0.109707		0.431444	0.0818552
P52789	HK2	0.247477	-0.0348741	0.544866	0.268939	0.121764	0.146833	0.69372	0.0661712	0.136204	0.619759	0.648214	0.176668	-0.0578516		0.284104	0.0956554		0.264861	0.121225		0.275222	0.0727816
Q2TB90	HKDC1	0.468395	0.46129	0.802443	0.660089	0.462208	0.73559	0.830641	0.396893	0.522931	1.00094	0.36602	0.532988	0.508823		0.631522	0.0626337		0.554766	0.0936698		0.596096	0.0535305
P04439	HLA-A	-0.814611	-0.678591	-0.549546	-0.822914	-0.489779	-1.40299	-0.818884	-0.482066	-0.401056	-0.692716	-1.23537	-0.729534	-0.311941		-0.796759	0.113213		-0.642114	0.136002		-0.725385	0.0866203
P10321	HLA-C	-0.789539	-0.461455	-0.830924	-0.882926	-0.468006	-0.44053	-1.2563	-0.769828	-0.476797	-1.0854	-1.16991	-1.2721	-1.28494		-0.732812	0.113243		-1.00983	0.131343		-0.860665	0.0914294
P04440	HLA-DPB1	0.0488631	0.0290966	-0.432027	-0.183179	0.302073	-0.579895	-0.541733	-0.0533003	0.042777	-0.0848399	-0.658612	0.650558	-0.29398		-0.193829	0.127377		-0.0662329	0.17597		-0.134938	0.103249
P01903	HLA-DRA	-0.786095	-0.694023	-0.787646	-1.02492	-0.210782	-1.07145	-0.887523	-0.861997	-0.527445	-0.878872	-0.900547	-0.542577	-0.719369		-0.780349	0.10779		-0.738468	0.0694049		-0.761019	0.0639595
Q30154	HLA-DRB5	-0.145743	0.216183	-0.262251	0.293917	-0.109273	-0.104245	-0.694759	-0.0199878	0.132261	-0.597781	-0.661604	-0.179201	-0.11472		-0.115167	0.123036		-0.240172	0.130656		-0.172862	0.0876477
P13747	HLA-E	-0.762614	-1.18122	-1.01348	-0.427268	-0.734566	-0.530138	0.14859	-0.752688	-0.914173	-0.129365	0.025261	-0.3823	-0.360083		-0.642956	0.164427		-0.418891	0.146358		-0.539542	0.111526
Q8TCT9	HM13	-0.2494	-0.271246	-0.470913	0.058369	-0.158494	-0.187538	-0.586846	-0.201163	-0.409532	-0.594264	-0.514243	-0.0164556	-0.195295		-0.266581	0.0799048		-0.321825	0.0899555		-0.292078	0.0577783
P17096	HMGA1	0.185406	0.0977094	1.25778	0.38134	0.286919	0.595627	1.16544	0.0960077	0.334357	1.15402	0.534578	0.0948592	0.423336		0.567174	0.176937		0.439527	0.159965		0.50826	0.116992
P09429	HMGB1	-0.0924955	-0.14931	0.129895	0.0866366	-0.0592934	-0.0437751	0.326188	-0.0203445	-0.0952946	0.469142	0.126023	0.0602373	0.237019		0.0282637	0.0620035		0.129464	0.0826059		0.0749713	0.0505905
P26583	HMGB2	-0.599692	-1.06186	0.812607	0.425203	-0.664118	0.169491	0.635984	-0.800104	-0.434477	0.567499	0.171296	0.0188721	0.210661		-0.0403412	0.275645		-0.0443755	0.201101		-0.0422032	0.168029
P54868	HMGCS2	0.519806	0.596112	0.507592	0.496273	0.719279	0.767019	0.65907	0.73263	0.570235	0.734369	1.41649	0.337971	1.36524		0.609307	0.0410431		0.859489	0.178272		0.724776	0.0886653
P05114	HMGN1	-0.0599639	-0.143327	0.702728	-0.156712	-0.44385	-0.356022	0.471321	-0.0992465	-0.114968	0.314655	0.202353	-0.309327	-0.259128		0.00202486	0.160979		-0.044277	0.102321		-0.0193452	0.0950509
P30519	HMOX2	-0.264832	-0.227501	-0.415626	0.486883	-0.201939	0.217962	0.0383304	-0.305648	-0.258087	-0.0796919	-0.00247477	0.355741	0.25287		-0.0523889	0.119745		-0.006215	0.109034		-0.0310779	0.078682
P50135	HNMT	0.722063	0.922415	0.642179	0.787168	0.841303	1.18924	0.571952	0.994052	0.910175	0.723218	0.877045	1.07621	1.24393		0.810903	0.0772318		0.970773	0.0730335		0.884689	0.0562224
Q13151	HNRNPA0	-1.15165	-0.856039	-0.311174	-0.890963	-0.829523	-1.0021	-0.00109124	-0.897083	-0.956846	-0.100024	-0.389667	-0.724494	-0.714954		-0.720364	0.155043		-0.630511	0.133284		-0.678893	0.100276
P09651	HNRNPA1	-0.686677	-0.576511	0.00688742	-0.448251	-0.604089	-0.587409	0.0516574	-0.456894	-0.681229	-0.0204299	-0.197565	-0.324638	-0.255898		-0.406342	0.115646		-0.322776	0.0927439		-0.367773	0.0734811
P22626	HNRNPA2B1	-1.05594	-0.812018	-0.257817	-1.07456	-0.816058	-0.828454	0.202391	-0.81297	-0.817707	-0.232561	-0.138185	-0.893461	-0.679098		-0.663208	0.176599		-0.595664	0.133329		-0.632034	0.109131
P51991	HNRNPA3	-0.0527162	-0.120134	0.301403	0.0777797	-0.392728	-0.104245	0.120856	0.0257386	-0.103065	-0.141926	0.0608244	-0.260231	-0.14131		-0.0242549	0.0830512		-0.0933281	0.0484958		-0.0561349	0.0490725
Q99729	HNRNPAB	-0.213501	0.126071	0.371898	-0.289843	-0.0920987	-0.184202	0.348643	-0.187026	0.132779	0.343452	0.0713284	-0.0879092	-0.129442		0.00956675	0.103178		0.0238638	0.0809778		0.0161654	0.064276
P07910	HNRNPC	-0.483151	-0.491471	0.194915	-0.207302	-0.238684	-0.457005	0.111261	-0.453247	-0.452936	0.193029	-0.194203	-0.342108	-0.346144		-0.224491	0.107057		-0.265935	0.0996802		-0.243619	0.0709372
Q14103	HNRNPD	-0.396732	-0.11184	0.565991	-0.456304	-0.283003	-0.684566	0.39236	0.329462	-0.170316	0.303647	0.0584026	-0.297953	-0.15394		-0.139156	0.173588		0.0115504	0.107213		-0.0695993	0.103892
O14979	HNRNPDL	-0.314514	-0.435859	0.0467861	-0.212896	-0.329273	-0.354087	0.452369	-0.44563	-0.274344	-0.209964	0.129821	-0.233644	-0.244119		-0.163925	0.118195		-0.21298	0.0767702		-0.186566	0.0703164
P52597	HNRNPF	-0.45112	-0.576511	-0.180961	-0.22062	-0.249818	-0.60759	-0.217455	-0.368743	-0.0840988	-0.170356	-0.448885	-0.285942	-0.317513		-0.357725	0.069073		-0.279256	0.0542328		-0.321509	0.0444708
P31943	HNRNPH1	-0.82748	-0.731665	-0.0146127	-0.0413675	-0.604089	-0.496604	-0.246117	-0.723976	-0.658576	0.0468665	-0.472406	0.0731625	-0.254262		-0.423134	0.12352		-0.331532	0.140683		-0.380856	0.0899308
P55795	HNRNPH2	-0.465538	-0.367561	-0.145792	-0.380075	-0.443591	-0.518064	-0.418337	-0.397402	-0.445645	-0.307775	-0.641008	-0.340347	-0.465031		-0.39128	0.0452532		-0.432868	0.0482998		-0.410474	0.0321837
P31942	HNRNPH3	-1.20322	-0.860875	-0.423305	-0.707934	-0.775353	-0.658342	0.476466	-1.18096	-1.27423	-0.50583	0.261847	-0.724494	-0.526231		-0.593223	0.199249		-0.658316	0.226884		-0.623266	0.14379
P61978	HNRNPK	-0.399797	-0.380628	0.104713	-0.698095	-0.379031	-0.680679	0.136638	-0.303457	-0.221634	-0.0440327	-0.10085	-0.724494	-0.714954		-0.328126	0.126774		-0.35157	0.122169		-0.338946	0.0849036
P14866	HNRNPL	0.120225	0.287117	0.680685	-0.16217	-0.155578	-0.182473	0.194642	-0.0506889	-0.0840988	0.237454	-0.0619214	-0.147201	-0.260051		0.111778	0.118969		-0.0610845	0.0675198		0.0319956	0.0728432
Q8WVV9	HNRNPLL	0.324968	0.184254	0.348803	0.163723	0.241238	0.0551606	0.439148	0.185029	0.334789	0.153693	0.468857	0.0231583	0.142264		0.251042	0.049028		0.217965	0.0646763		0.235776	0.038396
P52272	HNRNPM	-0.0911254	-0.230383	0.256495	-0.340054	-0.180654	-0.374981	-0.169423	-0.111594	-0.0739227	-0.206177	-0.376965	-0.775987	-0.341996		-0.161446	0.0790271		-0.31444	0.104628		-0.232059	0.0653558
O43390	HNRNPR	-0.138291	-0.0938961	0.219427	-0.264423	-0.065997	-0.400623	0.112182	-0.157074	-0.044697	-0.014544	-0.170889	-0.342108	-0.480656		-0.0902317	0.0796504		-0.201661	0.0730636		-0.141661	0.0546973
Q00839	HNRNPU	-0.700314	-0.540139	0.23044	-0.430756	-0.671667	-0.42328	0.264965	-0.522741	-0.547694	0.239184	-0.0475877	-0.376976	-0.389181		-0.324393	0.153121		-0.274166	0.125867		-0.301211	0.0970117
Q9BUJ2	HNRNPUL1	0.30704	0.251727	0.181164	-0.15316	0.219136	-0.21123	-0.156445	0.37391	0.398296	-0.23903	-0.185083	-0.183785	-0.196522		0.0626044	0.0850206		-0.00536895	0.124105		0.0312321	0.0707373
Q1KMD3	HNRNPUL2	0.271268	0.160593	0.220874	-0.00420417	0.315417	-0.0611034	0.253409	0.143334	0.0902461	0.102053	-0.0793628	0.110001	0.0598504		0.165179	0.0544733		0.0710202	0.0320527		0.121721	0.0343524
P00738	HP	1.08674	1.37342	0.386101	1.62187	0.519759	1.16891	-0.373422	0.684416	1.15202	0.133226	0.837393	0.867785	1.18974		0.826197	0.260245		0.810763	0.156957		0.819074	0.151581
Q5SSJ5	HP1BP3	-0.343405	-0.207723	0.317105	-0.725254	-0.329273	-0.850967	0.0199449	-0.412179	-0.255311	-0.00340018	-0.264937	-0.570658	-0.0417385		-0.302796	0.152658		-0.258037	0.0881611		-0.282138	0.0883769
P37235	HPCAL1	0.29461	0.343292	0.258536	0.330285	0.378434	0.476722	0.251754	0.391677	0.212137	0.384717	0.0812273	0.55796	0.374697		0.333376	0.0294603		0.333736	0.0674432		0.333542	0.0332926
P00492	HPRT1	0.0949593	0.0343188	1.20687	0.36318	0.132436	0.362674	0.921159	-0.0214147	0.275962	1.23568	0.485071	0.25506	0.33516		0.445085	0.169701		0.427586	0.175045		0.437009	0.116843
P02790	HPX	1.91518	1.85795	0.710393	1.98829	1.78402	1.83072	0.610837	1.58958	1.78182	0.946082	1.2077	1.83129	1.90424		1.5282	0.225594		1.54345	0.15722		1.53524	0.135868
P04196	HRG	-0.084293	0.270288	-0.153742	0.371177	0.113425	0.109756	-0.250193	-0.281213	0.236509	-0.434994	-0.0982758	0.104373	0.279068		0.0537741	0.0857511		-0.0324222	0.117808		0.0139912	0.0693006
Q99714	HSD17B10	-0.120558	-0.112792	-0.141053	0.231712	-0.176497	0.0863562	-0.161228	-0.104172	-0.123278	-0.177163	-0.10085	-0.0946368	0.0791028		-0.0562943	0.0584038		-0.0868328	0.0353932		-0.070389	0.0343302
Q8NBQ5	HSD17B11	-0.994756	-1.06508	-1.06635	-0.856196	-0.887745	-0.947984	-0.945534	-1.02283	-1.01064	-0.968296	-1.12673	-0.997427	-0.900211		-0.966235	0.0307206		-1.00435	0.0303036		-0.983828	0.0214658
Q53GQ0	HSD17B12	-0.0911254	-0.0360521	-0.0465192	-0.179836	0.0460847	-0.124886	0.0611561	-0.0735255	-0.149076	0.164618	0.115211	-0.354558	0.0335366		-0.0530253	0.0330537		-0.0439656	0.0781539		-0.0488439	0.0383467
P51659	HSD17B4	0.283538	0.00648046	-0.331649	0.172304	0.0582381	0.0456045	-0.18614	0.216472	0.0231782	-0.305471	-0.14297	-0.0131598	0.181146		0.0069109	0.0786646		-0.00680069	0.0803865		0.000582473	0.0539686
Q92506	HSD17B8	-0.149329	-0.107314	-0.221255	-0.338005	-0.191353	-0.162149	-0.308635	-0.10644	-0.231452	-0.296427	-0.241452	-0.333847	-0.274621		-0.211148	0.0320321		-0.247373	0.0320297		-0.227868	0.0223766
Q6YN16	HSDL2	0.460009	0.499253	0.077823	0.0368403	0.81234	0.031781	-0.180034	0.665376	0.538356	-0.226614	-0.133577	0.105826	0.0913205		0.248287	0.131843		0.173448	0.146149		0.213746	0.0943583
P07900	HSP90AA1	0.496369	0.558757	0.697245	0.231712	0.347466	0.448536	0.77859	0.553349	0.319486	0.615768	0.556591	0.540736	0.519833		0.508382	0.0719434		0.517627	0.0417232		0.512649	0.0415938
P08238	HSP90AB1	0.612464	0.617231	0.441746	0.172304	0.620965	0.579756	0.512417	0.576593	0.402738	0.395076	0.622135	0.702496	0.609114		0.508126	0.0613062		0.551359	0.0511002		0.52808	0.039405
Q58FF6	HSP90AB4P	0.625926	0.596041	0.717127	0.367934	0.559648	0.634964	1.0722	0.600125	0.520794	0.352593	1.09629	0.35862	0.407368		0.653406	0.0807882		0.555965	0.115112		0.608433	0.0670974
P14625	HSP90B1	-0.161758	0.0525392	-0.0503443	-0.0611484	-0.0362534	-0.0668479	-0.138406	0.0343374	-0.258047	-0.0451232	-0.187266	0.0960157	0.170685		-0.0660312	0.0265554		-0.0315663	0.0676377		-0.0501243	0.0330793
O43301	HSPA12A	-0.405856	-0.4166	-0.437381	-0.645158	-0.478865	-0.579895	-0.212419	-0.562416	-0.488169	-0.485873	-0.412828	-0.530688	-0.558447		-0.453739	0.0524093		-0.506403	0.023055		-0.478046	0.0299861
Q96MM6	HSPA12B	-0.243946	-0.169845	-0.305659	-0.669579	-0.303475	-0.226851	-0.396887	-0.241155	-0.209424	-0.462233	-0.331148	-0.440677	-0.355317		-0.330892	0.0626352		-0.339993	0.0417174		-0.335092	0.037318
P0DMV8	HSPA1A	-0.0714197	0.0861747	0.125017	-0.274433	0.0652502	-0.0249238	-0.111823	-0.00436689	0.0685399	0.253777	0.18607	-0.0321925	0.0437848		-0.0294511	0.052277		0.0859354	0.0456018		0.0238042	0.0375689
P54652	HSPA2	0.0586161	0.0401283	-0.278829	-0.0253749	0.112349	0.260791	-0.0709795	0.0794405	0.0225993	-0.41187	0.179857	0.234927	0.136646		0.0138144	0.0632026		0.0402666	0.0953836		0.0260231	0.0532877
P34932	HSPA4	0.102047	0.267681	0.591848	0.190988	0.11921	0.228985	0.63231	0.157515	0.191069	0.440945	0.440761	0.213344	0.214891		0.304724	0.0824174		0.276421	0.0526827		0.291661	0.0487762
O95757	HSPA4L	-0.549951	-0.55383	-0.43584	-0.486705	-0.589679	-0.473944	-0.201017	-0.712767	-0.813472	-0.310489	-0.42462	-0.400871	-0.233737		-0.470138	0.0491731		-0.482659	0.0938171		-0.475917	0.0484445
P11021	HSPA5	0.131923	0.226576	0.154041	-0.0469859	0.0256457	0.0743341	0.177861	0.188718	-0.0162572	0.0266286	0.0676852	0.0468533	0.125899		0.106199	0.035706		0.0732545	0.0300098		0.090994	0.0232145
P11142	HSPA8	0.245967	0.411626	0.547281	0.214753	0.135367	0.148405	0.517192	0.389588	0.135432	0.362917	0.311329	0.217511	0.25287		0.317227	0.0652787		0.278275	0.0388969		0.299249	0.038336
P38646	HSPA9	0.292078	0.500277	0.320481	0.468361	0.294205	0.347951	0.219987	0.401175	0.174817	0.12228	0.182113	0.422508	0.463059		0.349049	0.038058		0.294325	0.0613167		0.323792	0.0342783
P04792	HSPB1	0.0982708	0.0712221	-0.529082	-0.164564	-0.0239566	-0.0095077	-0.383038	0.0393545	-0.0652123	-0.750333	-0.0649423	0.0929361	0.089398		-0.134379	0.0903323		-0.1098	0.131315		-0.123035	0.0743338
O14558	HSPB6	-0.206125	-0.275342	-0.143004	-0.412778	-0.24394	-0.643618	-0.503927	-0.238604	-0.262767	-0.212534	-0.559891	-0.535169	-0.707898		-0.346962	0.06799		-0.419477	0.0849285		-0.38043	0.0523502
P10809	HSPD1	-0.0483178	0.172797	0.148881	0.172304	0.00385803	0.202716	0.245102	0.0611774	-0.156602	0.0699086	0.101721	0.171969	0.412228		0.128191	0.0408831		0.110067	0.0753476		0.119826	0.0393521
P61604	HSPE1	-0.198129	0.142434	-0.381515	-0.286459	-0.0651898	0.00190082	0.141577	0.011354	-0.105564	-0.422405	0.0470198	0.0654455	-0.0522389		-0.0921973	0.077452		-0.0760647	0.0739834		-0.0847515	0.0517016
P98160	HSPG2	-1.23116	-1.13145	-1.13499	-1.28554	-1.11165	-1.31164	-1.18178	-1.12569	-1.04112	-1.28494	-1.36144	-1.29779	-1.26953		-1.19832	0.0299979		-1.23008	0.0493325		-1.21298	0.0270405
Q92598	HSPH1	-0.00547716	0.0308932	-0.0601088	0.0556573	-0.0300082	0.421549	0.013691	-0.0291941	-0.0259403	0.0107117	-0.0574188	0.0550459	0.025572		0.0608851	0.0618249		-0.00353728	0.0168778		0.0311517	0.0342026
Q92743	HTRA1	-0.745039	-0.71412	-0.762828	-0.707934	-0.531629	-1.09105	-1.10222	-0.646536	-0.381115	-1.06827	-0.822525	-0.860682	-1.07029		-0.80783	0.0798644		-0.808237	0.107676		-0.808018	0.0628243
O43464	HTRA2	0.316631	0.217649	0.165059	0.450689	0.275522	0.26798	0.113505	0.213514	0.219149	0.213468	0.253165	0.525635	0.170685		0.258148	0.0414379		0.265936	0.0530313		0.261742	0.031692
P42858	HTT	-0.241168	-0.139721	-0.0957628	-0.486705	-0.324623	-0.44053	-0.190975	-0.147361	-0.192723	-0.237201	-0.032411	-0.601936	-0.116246		-0.274212	0.0563384		-0.221313	0.0812682		-0.249797	0.0467183
Q7Z6Z7	HUWE1	-0.247346	-0.242047	-0.256046	0.125923	-0.145778	0.275315	-0.0444838	-0.235496	-0.326475	-0.0874305	-0.0270368	0.0201385	0.0652148		-0.0763519	0.0785894		-0.0985141	0.0624093		-0.0865806	0.0492143
Q5T013	HYI	1.81739	1.92075	1.08305	2.3768	1.70769	2.09583	1.07549	1.69594	1.78741	1.3963	1.86563	2.37634	2.37623		1.72529	0.185388		1.91631	0.159302		1.81345	0.12202
Q9Y4L1	HYOU1	0.301593	0.199257	-0.0307611	0.212218	0.259628	0.0464721	-0.0653557	0.451672	0.163161	-0.197523	-0.131612	0.184623	0.157756		0.131865	0.0553699		0.10468	0.0966423		0.119318	0.05135
P41252	IARS1	0.219543	0.21734	0.00447178	0.205697	0.312063	0.623156	0.115545	0.327558	0.428412	0.287189	0.212479	0.253676	0.324744		0.242545	0.073197		0.305676	0.0303524		0.271683	0.0412576
Q9NSE4	IARS2	-0.141068	-0.11184	-0.0793675	0.138843	-0.126211	0.10792	-0.0326552	-0.0278197	-0.204964	-0.152636	-0.10085	0.0518419	0.089398		-0.0349111	0.043121		-0.057505	0.0472904		-0.0453391	0.0306799
P05362	ICAM1	-0.252148	-0.324996	-0.498598	-0.0486108	-0.119044	-0.0366241	-0.569322	-0.235496	-0.39051	-0.418933	-0.500965	-0.0692455	-0.15394		-0.264192	0.0803598		-0.294848	0.0686311		-0.278341	0.0516128
P14735	IDE	0.810039	0.586435	0.437631	0.395033	-0.0801217	0.530825	0.606528	0.776265	0.144946	0.394696	0.717854	0.382301	0.511344		0.469481	0.104747		0.487901	0.0955752		0.477983	0.0686853
O75874	IDH1	0.99192	1.06299	0.651118	0.420197	0.706296	0.661902	0.523078	1.15324	0.756445	0.448679	0.563592	0.766799	0.496922		0.716786	0.0884361		0.697613	0.105838		0.707937	0.0653256
P48735	IDH2	0.223007	0.220498	-0.00162416	0.177998	0.501039	-0.0756926	-0.171147	0.19153	0.0941022	-0.128937	0.0381131	0.280661	0.13027		0.124868	0.0854892		0.100956	0.0572142		0.113832	0.0510784
P50213	IDH3A	-0.133801	-0.0217744	0.587845	-0.143569	-0.183046	-0.118709	0.753716	-0.146307	-0.137619	0.583789	0.575188	-0.15659	-0.0829292		0.105809	0.148153		0.105922	0.15012		0.105861	0.101209
O43837	IDH3B	-0.161798	-0.208398	0.287421	-0.299286	-0.204615	-0.25055	0.465636	-0.217596	-0.159632	0.310663	0.122627	-0.290715	-0.260051		-0.0530843	0.113759		-0.0824507	0.0992862		-0.066638	0.0734692
P51553	IDH3G	-0.596	-0.515506	0.133289	-0.5009	-0.575749	-0.693689	0.202391	-0.438119	-0.518033	0.183	-0.0699391	-0.437764	-0.289355		-0.363738	0.139484		-0.261702	0.110019		-0.316644	0.0882126
Q9Y5U9	IER3IP1	0.977268	0.903383	0.413866	1.08825	0.8698	0.992158	0.450288	0.87169	0.673115	0.624886	0.45931	1.28484	1.00094		0.813573	0.102016		0.819131	0.121275		0.816139	0.0750399
Q16666	IFI16	-0.277568	-0.134716	-0.492258	-0.33179	-0.382242	-0.305548	-0.723846	-0.325208	-0.0607391	-0.601628	-0.677846	-0.154105	-0.28306		-0.378281	0.0705995		-0.350431	0.0996563		-0.365427	0.0571653
P08069	IGF1R	-0.184682	-0.170851	-0.287753	-0.00420417	-0.261264	-0.0668479	-0.407141	-0.202162	-0.291817	-0.314228	-0.215053	-0.284144	-0.223862		-0.197535	0.0515171		-0.255211	0.0192092		-0.224155	0.02923
Q9Y6M1	IGF2BP2	0.0506136	0.0016059	0.124134	-0.0183533	-0.230499	0.101402	0.242004	0.0102614	0.0369629	-0.101428	0.135672	-0.556884	-0.134306		0.038701	0.0555929		-0.10162	0.0993921		-0.0260626	0.0560323
P35858	IGFALS	0.648821	0.856746	0.0798061	0.344579	0.421851	0.414084	-0.342289	0.61375	0.402738	-0.574012	-0.154823	-0.169775	0.0335366		0.346228	0.146998		0.0252357	0.174974		0.198078	0.11764
P01876	IGHA1	1.3868	1.13889	0.5519	1.94157	1.44675	1.54625	0.308298	0.83337	1.25631	0.00384965	1.17837	1.67637	1.59317		1.18864	0.217321		1.09024	0.250204		1.14322	0.157971
P01857	IGHG1	1.38632	1.35661	0.542921	1.70838	1.28426	1.50525	0.774949	1.31631	1.2827	0.376999	0.977975	1.62126	1.46574		1.22267	0.156357		1.1735	0.181737		1.19997	0.113946
P01859	IGHG2	1.8169	1.30628	0.841474	2.16703	2.05239	1.23507	1.4647	1.41258	1.58879	0.657558	0.742668	2.16651	2.16638		1.55483	0.180743		1.45575	0.269279		1.5091	0.15147
P01860	IGHG3	1.21325	1.39833	0.347723	1.66164	1.70925	1.90384	0.577799	0.805911	1.01541	0.285904	0.685332	1.51739	1.83115		1.25883	0.223427		1.02352	0.231087		1.15023	0.157659
P01861	IGHG4	1.74327	0.600954	-0.173391	1.59384	1.54586	0.896352	0.940457	1.63385	2.05027	0.376999	0.998004	1.66109	1.8651		1.02105	0.255898		1.43089	0.255893		1.2102	0.183579
P01871	IGHM	-1.04996	-1.19146	-1.14887	-1.31252	-0.697404	-1.01306	-1.5749	-0.365168	-0.950076	-1.76825	-1.71726	-1.85482	-0.0773438		-1.14117	0.102554		-1.12215	0.316367		-1.13239	0.148616
A0A0C4DH31	IGHV1-18	1.1802	1.27713	0.449243	1.25048	0.991635	0.867236	0.120856	1.12695	1.31771	-0.0628781	0.335015	0.971263	1.66096		0.876683	0.166153		0.891503	0.261791		0.883523	0.143586
P01817	IGHV2-5	0.737786	0.786231	0.259059	0.908545	0.944613	0.260791	0.455684	0.725811	1.06838	-0.408817	0.395304	0.821716	1.42709		0.621816	0.110887		0.67158	0.258025		0.644784	0.127142
A0A0B4J1V0	IGHV3-15	1.07337	1.22709	0.408322	1.46678	0.843711	1.33291	0.646402	1.04188	1.21514	0.463706	0.420715	1.33002	1.21182		0.999797	0.145177		0.947214	0.164142		0.975528	0.104465
P01772	IGHV3-33	0.058528	0.152734	-0.161881	0.958925	0.0649281	0.197708	-0.205427	-0.044514	0.00195645	-0.40722	-0.254658	0.259154	0.338051		0.152216	0.146044		-0.0178718	0.117216		0.0737141	0.0947826
P01780	IGHV3-7	1.05001	0.746992	0.430943	0.670997	1.16386	0.737443	0.425593	0.859863	0.9209	0.465561	0.592051	0.863938	0.770123		0.746548	0.106307		0.745406	0.0731187		0.746021	0.0638027
A0A0C4DH38	IGHV5-51	0.81757	0.677317	0.0606201	1.42796	0.519759	0.886103	0.00636782	0.744794	0.867184	-0.301434	-0.213882	1.263	1.60611		0.627956	0.186763		0.660961	0.316062		0.643189	0.169187
A0A075B6S2	IGKV2D-29	1.37438	1.18808	0.931189	1.22464	1.50621	1.21551	0.962943	0.981072	0.961974	0.981169	1.17748	1.53375	1.31335		1.20042	0.0777078		1.15813	0.0942859		1.1809	0.0580722
P01619	IGKV3-20	2.25954	1.81604	-0.0205298	1.67269	2.14013	1.37796	0.663469	1.97295	2.13786	0.52506	0.914368	1.55965	1.66322		1.41561	0.312182		1.46218	0.254665		1.43711	0.196864
P0DOY2	IGLC2	1.6849	1.74188	0.784131	1.80903	1.6849	1.60576	0.685425	1.70789	1.66186	0.466976	0.968299	1.75597	1.72978		1.428	0.180824		1.38179	0.220132		1.40668	0.134782
B9A064	IGLL5	1.78402	1.78282	1.05637	1.29951	2.48814	1.0041	0.179426	2.05105	1.91311	0.01233	0.335015	0.958397	1.27262		1.37063	0.278035		1.09042	0.335816		1.2413	0.210061
P01701	IGLV1-51	0.284824	0.497651	0.00447178	0.422812	1.21325	0.571103	0.327802	0.871751	1.03566	0.310454	0.624882	0.578189	0.711734		0.47456	0.141145		0.688778	0.10227		0.57343	0.0912434
Q969P0	IGSF8	-0.245722	-0.378929	-0.375769	-0.371516	-0.369571	-0.287205	-0.15444	-0.375239	-0.433628	-0.346144	-0.379318	-0.551746	-0.601628		-0.311879	0.0328181		-0.44795	0.0428009		-0.374681	0.0320268
Q12905	ILF2	0.107607	-0.0125436	0.118861	0.106784	0.0764883	0.0986326	0.538406	0.00927582	-0.131842	0.397319	0.455915	0.0880744	0.0335366		0.147748	0.0672453		0.142047	0.0950452		0.145116	0.0543631
Q12906	ILF3	0.1004	-0.101345	0.184709	0.549259	0.14797	-0.104245	0.382105	-0.183648	-0.0411125	0.3129	0.176776	-0.00448637	0.0497822		0.165551	0.0903791		0.0517019	0.0709537		0.113005	0.0586154
Q13418	ILK	0.0232702	-0.420278	-0.752028	-0.55815	-0.305832	-0.224111	-0.290881	0.0904752	-0.376747	-0.523172	0.0979677	-0.390537	-0.53267		-0.361144	0.0938143		-0.272447	0.118929		-0.320207	0.072474
Q9H0C8	ILKAP	-0.0515412	-0.127911	0.208661	-0.217106	-0.299834	-0.0530004	0.356283	-0.148891	-0.183665	-0.0226478	0.0584026	-0.372267	-0.318899		-0.0263497	0.0878959		-0.164661	0.0676818		-0.0901859	0.0579406
A1L0T0	ILVBL	-0.33974	-0.0771143	-0.175096	-0.119046	-0.050374	-0.0517843	-0.212419	-0.0310326	-0.12475	-0.276326	-0.12848	-0.206308	-0.0254152		-0.14651	0.0397265		-0.132052	0.039988		-0.139837	0.0271429
Q16891	IMMT	-0.259828	-0.377761	-0.24969	-0.0749824	-0.308515	-0.123515	-0.17387	-0.341514	-0.410952	-0.162652	-0.144758	-0.210188	-0.172745		-0.224023	0.0401027		-0.240468	0.0447192		-0.231613	0.0286908
P29218	IMPA1	0.651472	0.525742	0.101229	0.668447	0.397969	0.428002	0.934657	0.496504	0.478837	0.6444	0.760906	0.61524	0.490848		0.529645	0.0987261		0.581123	0.045921		0.553404	0.0555388
P20839	IMPDH1	0.144587	-0.130966	1.24104	0.0971124	-0.0197224	-0.0751355	1.35485	0.0267043	0.400121	1.29031	0.984531	0.028736	0.00866759		0.37311	0.241762		0.456512	0.226973		0.411603	0.160584
P12268	IMPDH2	0.360393	0.279482	0.35431	0.528107	0.387851	0.288201	0.366731	0.338037	0.231503	0.481296	0.205591	0.419741	0.225886		0.366439	0.0310382		0.317009	0.0469094		0.343625	0.0270766
Q17R60	IMPG1	0.523064	0.0941976	1.85979	0.500471	0.679071	0.239754	1.66026	0.336627	0.411362	1.8651	0.804919	0.453539	0.465685		0.793802	0.260768		0.722871	0.23779		0.761065	0.171131
Q9BZV3	IMPG2	0.494095	0.0188551	1.52408	0.804519	0.448469	0.489283	1.8642	0.201315	0.424725	2.5876	0.859655	0.68026	0.64996		0.806215	0.24787		0.900585	0.349974		0.849771	0.200699
Q16352	INA	-1.01333	-0.582592	-0.269824	-0.226936	-0.556119	-0.538295	0.677546	-1.1046	-0.856395	0.453398	0.0331596	-0.226515	-0.147326		-0.358508	0.198144		-0.308046	0.235505		-0.335218	0.145907
Q27J81	INF2	-0.136758	0.0608677	-0.00710093	-0.675429	-0.219298	-0.925417	-0.729413	-0.0366824	-0.0909173	0.309269	-0.951157	-0.761016	-0.808734		-0.376078	0.148416		-0.389873	0.210646		-0.382445	0.12028
P58166	INHBE	-2.61695	-2.51869	-2.51942	-2.19776	-2.06886	-2.29977	-2.19638	-2.74725	-2.51817	-2.3002	-2.24547	-2.30034	-2.3002		-2.34541	0.0781655		-2.40194	0.079217		-2.3715	0.054018
P49441	INPP1	0.515939	0.563413	0.751104	0.432933	0.605251	0.865668	0.81236	0.53026	0.5389	0.867648	0.810726	0.635043	0.474252		0.649524	0.0612731		0.642805	0.0660012		0.646423	0.0430053
Q9BT40	INPP5K	0.221027	0.850448	0.421134	0.416405	0.416757	0.757065	0.547519	1.12496	0.737719	0.748033	0.829923	0.540736	1.33976		0.518622	0.0826194		0.886855	0.119215		0.688576	0.0859016
Q68E01	INTS3	0.503512	0.490453	0.0247812	0.863277	0.356542	0.56255	-0.221195	0.378094	0.503371	0.12841	0.109772	0.335347	0.633399		0.36856	0.136416		0.348066	0.0839902		0.359101	0.0798466
O94829	IPO13	0.0940174	0.285517	-0.0223509	0.326041	0.216708	0.750439	-0.0221854	0.212256	0.167528	0.33996	0.573876	0.0960157	0.399517		0.232598	0.101073		0.298192	0.0714951		0.262872	0.0618263
O00410	IPO5	0.501039	0.588624	0.673225	0.183627	0.614928	0.341801	0.564173	0.572363	0.418152	0.602459	0.444567	0.270562	0.404372		0.495345	0.0654937		0.452079	0.0495023		0.475376	0.0408027
O95373	IPO7	0.201316	0.186082	0.463944	0.334629	0.107202	0.183164	0.221212	0.212839	0.431991	0.33224	0.171296	0.202958	0.268905		0.242507	0.044903		0.270038	0.0398416		0.255214	0.0293905
Q96P70	IPO9	0.491342	0.308935	0.067776	0.365677	0.346593	0.294519	-0.0073029	0.449636	0.224902	0.23608	0.243024	0.352081	0.488445		0.266791	0.0661616		0.332362	0.0473649		0.297054	0.0412188
P46940	IQGAP1	0.187376	0.0750458	-0.335987	0.00189368	0.219136	0.0926521	-0.365806	0.142223	0.0685399	-0.281533	-0.191393	0.21979	0.178081		-0.0179555	0.0902106		0.0226181	0.0851994		0.000770757	0.060175
Q13576	IQGAP2	0.341668	0.452756	0.150144	0.428868	0.373707	0.548417	0.0660946	0.484112	0.332612	0.217624	0.314083	0.596781	0.748033		0.337379	0.0647724		0.448874	0.0811945		0.388838	0.0515247
Q96CN7	ISOC1	1.31289	0.367348	0.545092	0.0828632	1.12675	0.194835	0.326188	0.569139	1.20468	0.26616	0.270404	-0.0107083	0.0274827		0.565138	0.178677		0.38786	0.184155		0.483317	0.125571
Q96AB3	ISOC2	0.269555	0.181501	-0.0886443	0.952776	-0.154115	0.275315	0.136638	-0.359127	-0.114968	0.0332075	0.0812273	0.327177	0.33224		0.224718	0.136798		0.0499594	0.108373		0.14406	0.0890472
P53990	IST1	-0.106115	-0.107975	-0.222491	-0.308825	-0.0107595	-0.197178	-0.136783	-0.0964222	-0.0292239	-0.150267	-0.144758	-0.0904181	-0.0345956		-0.155732	0.0364269		-0.0909474	0.0211581		-0.125832	0.0230274
Q9NPH2	ISYNA1	0.354061	0.567072	0.0998563	0.716984	0.620965	0.487588	0.306424	0.51286	0.513257	0.507055	0.450101	0.577355	0.762027		0.450422	0.0798877		0.553776	0.0447853		0.498124	0.0482202
Q96J02	ITCH	0.0867935	0.159282	-0.091836	0.147623	0.168865	0.13207	-0.0580094	0.0697751	0.00352122	-0.101428	-0.025391	0.415877	-0.0470837		0.0778269	0.0408406		0.0525451	0.0762492		0.0661583	0.0397538
P56199	ITGA1	-0.871004	-0.914923	-0.893197	-1.14384	-0.820356	-0.964808	-0.945534	-0.820172	-0.893748	-0.965242	-1.16991	-0.882526	-0.981507		-0.936238	0.0390342		-0.952183	0.0497082		-0.943597	0.0298439
P26006	ITGA3	-0.259828	-0.350776	-0.762828	-0.786186	-0.357682	-0.815398	-0.713328	-0.47971	0.0308856	-0.882426	-0.511645	-0.655296	-0.732408		-0.578004	0.0917527		-0.538433	0.128829		-0.55974	0.0740989
P08648	ITGA5	-1.09413	-1.16193	-1.11027	-1.10155	-1.04574	-1.10926	-1.21055	-1.14109	-1.00382	-1.21674	-1.24071	-1.32943	-1.29765		-1.11906	0.0199321		-1.20491	0.0483166		-1.15868	0.0266181
P23229	ITGA6	-0.561709	-0.829576	-1.07842	-0.292589	-0.714408	-1.30523	-1.11377	-1.02542	-0.947007	-1.30571	-1.138	-1.12177	-1.11892		-0.842242	0.132842		-1.10947	0.0493361		-0.965578	0.0818423
P11215	ITGAM	-0.873415	-0.946653	-1.01052	-0.747051	-0.777629	-0.991301	-1.06964	-0.911955	-0.836161	-0.90756	-1.15969	-0.893461	-1.33663		-0.916601	0.0459424		-1.00758	0.0802017		-0.95859	0.0444596
P06756	ITGAV	0.0739286	0.310577	-0.269824	0.00448194	0.328096	0.0779057	-0.351039	0.259294	0.0113815	-0.394729	-0.220255	0.142227	0.214891		0.0248751	0.0984839		0.00213483	0.106155		0.0143796	0.0692032
P05556	ITGB1	-0.985427	-0.902273	-0.848223	-0.909461	-0.714408	-0.878384	-0.9951	-0.979534	-0.937358	-0.928574	-0.977644	-0.697659	-0.760867		-0.890468	0.0356546		-0.880273	0.0491701		-0.885762	0.0284492
P05107	ITGB2	-0.705562	-0.888214	-0.90175	-1.14384	-0.680451	-1.20109	-1.00571	-0.821773	-0.82214	-0.92112	-1.10116	-0.887168	-1.02589		-0.932374	0.0756091		-0.929874	0.0460975		-0.93122	0.044135
P16144	ITGB4	-0.128639	-0.252216	-0.729083	-0.692812	-0.388959	-0.652169	-0.665384	-0.504675	-0.488169	-0.972389	-0.674263	-1.01238	-1.07029		-0.501323	0.0915197		-0.787029	0.10757		-0.633187	0.0785545
P26012	ITGB8	0.804878	0.813726	0.281151	1.02728	0.999629	0.762382	0.256255	0.933712	0.648906	0.378364	0.525101	0.864584	0.949651		0.706472	0.1192		0.71672	0.0964378		0.711202	0.0749407
P19827	ITIH1	0.643996	1.02051	0.204701	1.11455	0.770746	1.04875	0.235982	0.740558	1.06688	-0.0606888	0.415322	0.72757	0.772657		0.71989	0.143279		0.610383	0.158512		0.669348	0.102992
P19823	ITIH2	0.463625	1.03274	0.452597	0.372759	0.448469	0.926777	-0.111823	0.615868	0.928285	-0.400241	0.0940907	0.0215176	0.754653		0.512163	0.143233		0.335696	0.208476		0.430717	0.120526
Q06033	ITIH3	-0.0817922	-0.200084	-0.475305	-0.214904	-0.073228	0.278092	-0.551846	-0.218299	-0.0339579	-0.509163	-0.301096	-0.294432	-0.184229		-0.188438	0.104368		-0.256863	0.0641542		-0.220019	0.061815
Q14624	ITIH4	0.466431	0.883212	-0.0222952	0.330285	0.330691	0.497942	-0.32056	0.624899	0.557169	-0.443801	0.0320514	-0.0223279	0.197169		0.309386	0.146159		0.157527	0.162215		0.239297	0.106251
Q86UX2	ITIH5	-0.0911254	-0.740615	-0.707894	-0.488658	-0.303475	-0.432093	-0.581515	-0.637312	-0.189865	-0.684282	-0.491533	-0.0814448	-0.365681		-0.477911	0.0865868		-0.408353	0.0986416		-0.445807	0.0631655
Q9Y287	ITM2B	-0.86796	-0.899841	-0.669986	-0.973632	-0.87353	-1.0021	-0.806347	-0.859953	-0.918167	-0.846385	-0.789124	-1.01238	-0.974352		-0.870486	0.0417343		-0.90006	0.0342832		-0.884136	0.0267034
Q9BY32	ITPA	1.02384	0.664914	0.238573	0.673746	0.453494	1.62065	0.153458	0.766667	0.54027	0.213468	0.345205	0.72757	0.43385		0.689811	0.190616		0.504505	0.0884755		0.604285	0.109539
Q14643	ITPR1	0.0232702	-0.0664232	-0.415752	-0.184871	0.090975	-0.166997	-0.54448	0.00197885	-0.232578	-0.386138	-0.215053	0.013671	-0.107605		-0.180611	0.0867757		-0.154287	0.0628186		-0.168462	0.0529202
Q8IWB1	ITPRIP	-0.373614	-0.265081	-0.676567	-0.688331	-0.259978	-0.0350131	-0.903318	-0.184481	-0.312028	-0.807036	-0.774864	-0.483899	-0.45967		-0.457415	0.115635		-0.503663	0.10108		-0.47876	0.074894
Q9P266	JCAD	-0.338293	-0.303771	-0.24125	-0.401802	-0.398587	-0.512853	-0.424817	-0.351277	-0.338704	-0.288735	-0.251226	-0.402814	-0.350236		-0.374482	0.0334765		-0.330499	0.0217152		-0.354182	0.0207958
P01591	JCHAIN	-0.288455	-0.153404	-0.797548	0.0866366	-0.235739	-0.312874	-0.945534	-0.3128	0.0797122	-1.10057	-0.907998	-0.775987	0.669723		-0.378131	0.137749		-0.391319	0.275185		-0.384218	0.140268
P14923	JUP	0.0681023	0.222589	-0.294276	0.103269	0.413408	0.0889088	-0.294512	0.00927582	0.082827	-0.102976	0.0620144	-0.0206404	0.0564882		0.043927	0.0980146		0.0144981	0.0281378		0.0303445	0.0525039
Q63ZY3	KANK2	-0.291776	-0.829576	-1.05019	-1.11738	-0.265426	-0.894573	-1.14083	-0.669282	-0.746871	-1.10963	-0.891812	-0.818837	-0.874724		-0.798538	0.140861		-0.85186	0.0616475		-0.823148	0.0783058
Q15046	KARS1	0.161828	0.201242	0.157173	-0.085685	0.258012	-0.0696097	0.0892892	0.182775	0.132779	-0.0296025	-0.0291399	-0.0927817	-0.172745		0.10175	0.0501543		-0.00145249	0.0551358		0.0541181	0.0385022
O94819	KBTBD11	-0.521477	-0.453533	-0.131164	-0.698095	-0.755528	-0.322779	-0.439669	-0.682036	-0.459204	-0.473046	-0.626984	-0.775987	-0.645685		-0.474607	0.0807302		-0.61049	0.050265		-0.537322	0.0512148
Q9P0J7	KCMF1	0.130609	0.138629	0.117348	0.125923	-0.0102824	0.242075	0.0892892	0.0651777	0.0642518	0.117634	0.160109	0.0374467	-0.0380356		0.119084	0.0281639		0.067764	0.0277767		0.095398	0.0204077
Q96CX2	KCTD12	-0.57715	-0.440577	-0.858648	-0.846031	-0.82748	-0.484771	-0.826025	-0.241155	-0.721324	-0.85347	-0.749945	-0.471852	-0.503845		-0.694383	0.0702246		-0.590265	0.092253		-0.646329	0.0564701
O60341	KDM1A	-0.291019	-0.27842	-0.1643	-0.436178	-0.337494	-0.481124	-0.159432	-0.24331	-0.328237	-0.276326	-0.256965	-0.491949	-0.314228		-0.306852	0.0465852		-0.318503	0.0371557		-0.312229	0.029199
Q07666	KHDRBS1	-0.0893704	0.00336262	0.644192	-0.039813	0.391441	-0.109708	0.582838	0.169946	-0.156602	0.367362	0.3477	-0.0571429	-0.14533		0.197563	0.125006		0.0876555	0.0979015		0.146837	0.0793757
Q92945	KHSRP	-0.0877653	-0.169845	0.0831018	-0.63556	-0.141068	-0.621261	0.00353773	0.0797951	0.272281	-0.131894	-0.274589	-0.685353	-0.580285		-0.224123	0.109289		-0.220008	0.151583		-0.222223	0.0873773
Q9H1H9	KIF13A	0.693837	0.532683	0.0279392	0.942903	0.385886	0.841883	0.0941099	0.623061	0.490058	0.274727	0.303548	0.718216	0.740536		0.502749	0.13383		0.525024	0.0829262		0.51303	0.0784526
Q9NQT8	KIF13B	-0.309932	-0.357239	-0.577618	-0.280788	-0.203452	0.0889088	-0.617672	-0.24096	-0.453035	-0.701293	-0.632396	-0.13701	-0.177916		-0.322542	0.0898074		-0.390435	0.0984595		-0.353877	0.0642743
Q7Z4S6	KIF21A	-0.10865	0.00926878	-0.0754277	-0.13955	0.0193193	-0.209935	-0.274954	-0.0641047	-0.142084	0.124069	-0.396563	-0.140432	-0.296427		-0.111419	0.0408836		-0.15259	0.0741259		-0.130421	0.0392655
Q9Y496	KIF3A	0.14489	0.0717694	0.120314	0.0408948	0.0604548	0.192985	-0.0674926	0.0337482	0.0369354	0.365119	0.0366031	-0.0999774	0.025572		0.0805452	0.0317477		0.0663333	0.0636143		0.0739859	0.0324619
P33176	KIF5B	-0.286308	-0.360138	-0.182991	-0.0821155	-0.0920987	-0.162817	-0.116587	-0.291694	-0.385675	-0.0551976	-0.126766	-0.00123772	-0.00448804		-0.183294	0.039433		-0.144176	0.0653829		-0.16524	0.0356712
Q07866	KLC1	-0.266734	0.0445867	-0.216865	-0.40253	-0.249818	-0.296602	-0.284347	-0.169253	-0.281069	-0.322729	-0.301402	-0.382348	-0.270434		-0.238901	0.0520791		-0.287873	0.0287196		-0.261504	0.030635
P03952	KLKB1	0.233144	0.495235	-0.226069	0.865006	0.207856	0.781744	-0.0523046	0.0708618	0.306808	-0.144928	0.144203	0.378176	0.67193		0.32923	0.154093		0.237842	0.114898		0.287051	0.0954175
P01042	KNG1	0.904665	1.17129	0.256495	1.28521	0.715021	0.949154	0.0892892	0.717017	1.08374	-0.0695342	0.404137	0.74331	0.93831		0.767303	0.169504		0.636164	0.169458		0.706777	0.116679
O00629	KPNA4	0.433799	0.543219	0.623165	0.340552	0.475427	0.461993	0.593934	0.44232	0.447941	0.612923	0.580763	0.425684	0.492719		0.496013	0.0370342		0.500392	0.0320865		0.498034	0.0238253
O60684	KPNA6	-0.0746597	-0.18553	-0.121092	-0.00533652	0.0735088	0.17801	-0.0817606	-0.047572	-0.0813353	0.0420238	-0.067025	-0.140432	0.0927484		-0.03098	0.0467375		-0.0335987	0.03497		-0.0321886	0.0286953
Q14974	KPNB1	0.368714	0.377394	0.350582	0.242154	0.409948	0.377138	0.321848	0.340944	0.321548	0.389745	0.305696	0.324621	0.380331		0.349683	0.0206178		0.343814	0.0138667		0.346974	0.0123345
P04264	KRT1	-0.633043	-0.424091	-0.777409	-0.93317	-1.15577	-1.04079	-1.18178	-0.703901	-0.503929	-0.797983	-1.32199	-1.20878	-0.95816		-0.878009	0.106362		-0.915792	0.126629		-0.895447	0.0784793
P13645	KRT10	-0.504386	-0.430266	-0.874659	-0.537967	-0.780906	-0.79957	-0.975074	-0.532156	-0.422007	-0.586299	-1.09192	-0.6624	-0.714954		-0.700404	0.0786653		-0.66829	0.0944433		-0.685582	0.0583328
P02533	KRT14	-0.755528	-0.818808	-0.869508	-0.046509	-1.02449	-0.32715	-0.336154	-0.465283	-0.465435	-0.38275	-0.325764	-0.227337	-0.147028		-0.596878	0.13586		-0.3356	0.0526861		-0.476288	0.0831689
P05783	KRT18	0.535331	0.513158	0.315212	0.290379	0.953611	0.410641	-0.12474	0.908243	0.751625	0.171766	0.544961	0.406574	0.898099		0.41337	0.122574		0.613545	0.119665		0.505758	0.0873423
P35908	KRT2	-0.574881	-0.407019	-0.830924	-1.00355	-0.900124	-0.908288	-1.12332	-0.574327	-0.431616	-0.651742	-1.32199	-0.905406	-0.938117		-0.821158	0.0939418		-0.803867	0.130536		-0.813177	0.0752266
P13647	KRT5	-0.528915	-0.867714	-1.0639	-0.54963	-0.861993	-0.848492	-1.31704	-0.674435	-0.471677	-0.978578	-1.29809	-0.911309	-0.863877		-0.862526	0.104261		-0.866327	0.114545		-0.86428	0.073825
P05787	KRT8	0.360128	0.430817	0.189241	0.537038	0.778577	0.859821	0.277993	0.83337	0.622212	0.46832	1.05456	0.643508	1.15402		0.490516	0.0948717		0.795999	0.109127		0.631509	0.0815233
P35527	KRT9	-0.628418	-0.576511	-0.879204	-0.672181	-1.02449	-0.861964	-1.2563	-0.628697	-0.49262	-0.837734	-1.24071	-0.961138	-0.814883		-0.842723	0.0915041		-0.829296	0.106538		-0.836526	0.066639
Q86UP2	KTN1	0.0464795	0.120249	0.00688742	0.153668	0.154117	0.0716588	0.0539369	0.122235	-0.0583865	0.102053	0.042264	0.335347	0.30961		0.0867137	0.0215156		0.142187	0.0626005		0.112317	0.0306917
P32004	L1CAM	-1.23116	-0.83626	-1.1861	-0.806045	-0.950602	-1.21379	-0.665384	-1.32627	-0.856395	-0.724857	-1.26735	-1.39845	-0.950626		-0.984192	0.086032		-1.08733	0.113974		-1.03179	0.0686374
P83111	LACTB	-1.12717	-1.17317	-1.01348	0.343835	-1.14603	0.372644	-0.204613	-0.972287	-1.11209	-0.0282282	0.168758	0.0443705	0.224959		-0.563998	0.269906		-0.279087	0.244718		-0.432501	0.181138
P24043	LAMA2	-0.444228	-0.50381	-0.455612	-0.345161	-0.568347	-0.742626	-0.78739	-0.628697	-0.514014	-0.85347	-1.06415	-0.344133	-0.606483		-0.549596	0.0613312		-0.668492	0.104126		-0.604471	0.0582282
Q16363	LAMA4	-1.01906	-0.99645	-1.27976	-1.36187	-1.01168	-1.43227	-1.29	-1.17294	-0.712948	-1.42206	-1.2194	-1.36747	-1.30571		-1.19873	0.069734		-1.20009	0.10438		-1.19935	0.0583481
O15230	LAMA5	-1.17104	-1.28261	-1.08665	-1.25781	-1.16769	-1.42162	-1.31704	-1.16227	-1.0704	-1.24474	-1.37412	-1.44202	-1.39326		-1.24349	0.0421083		-1.28114	0.0597114		-1.26087	0.0345309
P07942	LAMB1	-1.04102	-0.96611	-1.07035	-0.798878	-0.963445	-1.19416	-1.3324	-1.08773	-1.17211	-1.34056	-1.341	-0.805461	-1.0854		-1.05234	0.0652066		-1.13871	0.0815011		-1.0922	0.0507605
P55268	LAMB2	-1.26896	-1.462	-1.27976	-1.51769	-1.27582	-1.53409	-1.46781	-1.23306	-1.28172	-1.45277	-1.55658	-1.5932	-1.40815		-1.40088	0.0455964		-1.42091	0.058858		-1.41012	0.035132
P11047	LAMC1	-1.27582	-1.29602	-1.33337	-1.24911	-1.22669	-1.36015	-1.40268	-1.19873	-1.41019	-1.32929	-1.42779	-1.09344	-1.23522		-1.30626	0.0236871		-1.28245	0.0531032		-1.29527	0.0265538
P11279	LAMP1	-0.926625	-0.992345	-0.965611	-1.08799	-0.789539	-0.910669	-0.983896	-0.897083	-1.02722	-0.935374	-1.10608	-0.769059	-0.913836		-0.950954	0.0345249		-0.941441	0.0472385		-0.946564	0.0274212
P13473	LAMP2	0.239512	-0.471293	-0.479116	-0.133533	-0.238684	-0.0464916	-0.567758	0.174816	-0.232578	-0.365681	-0.277115	0.167819	0.237019		-0.24248	0.108756		-0.0492868	0.110293		-0.153314	0.0793519
Q9Y2Q5	LAMTOR2	0.592499	0.776464	0.360417	0.715934	0.231159	0.642575	0.0691394	1.11302	0.692431	0.354386	0.191535	0.556215	0.821619		0.484027	0.100896		0.621534	0.13505		0.547492	0.0814846
Q0VGL1	LAMTOR4	0.368714	0.322969	-0.259661	0.150526	0.329424	0.338325	-0.269964	0.378715	0.120733	0.0652148	-0.135797	0.37982	0.612128		0.140048	0.107892		0.236802	0.110031		0.184704	0.0752076
Q9NS86	LANCL2	-0.239851	-0.101345	0.47282	-0.277674	-0.158577	-0.414044	-0.0803659	-0.0779177	-0.047916	0.0407428	-0.317034	-0.351391	-0.161651		-0.114148	0.106937		-0.152528	0.0633919		-0.131862	0.0623064
P28838	LAP3	0.604774	0.497651	0.786888	0.692131	0.738947	0.698049	0.66084	0.492659	0.666737	0.977544	0.756581	0.916647	0.852743		0.668469	0.0357634		0.777152	0.0727738		0.71863	0.040093
Q9P2J5	LARS1	0.651472	0.329795	0.15565	0.557556	0.481858	0.532694	0.31244	0.531829	0.330576	0.142707	0.315665	0.516186	0.292775		0.431638	0.0650396		0.354956	0.0600925		0.396246	0.0442166
P18428	LBP	0.112894	-0.461455	-0.86428	0.0484193	-0.269066	-0.445907	-0.812266	-0.279324	-0.0186795	-0.991671	-0.563064	-0.617031	-0.279547		-0.384523	0.144008		-0.45822	0.138793		-0.418537	0.0969557
Q9UIC8	LCMT1	0.329159	0.208256	0.365738	0.275309	0.272977	0.134086	0.302758	0.175643	0.323962	0.273343	0.260434	0.0793807	0.148496		0.269755	0.0293015		0.21021	0.0372234		0.242272	0.0238965
P13796	LCP1	1.11869	0.808945	0.168658	0.926724	0.919417	0.52094	0.158651	0.958409	0.858917	0.204924	0.426029	1.05746	0.661733		0.66029	0.145006		0.694578	0.13432		0.676115	0.0956817
Q9H6V9	LDAH	-0.00617404	-0.140222	-0.390761	-0.159597	-0.131803	0.123912	-0.436443	-0.269177	0.0768045	-0.348946	-0.379318	-0.0206404	-0.40207		-0.163013	0.0748113		-0.223891	0.0827291		-0.19111	0.0538493
P00338	LDHA	0.0514377	0.0916354	1.30185	0.214753	0.0798234	0.26349	1.24311	-0.164625	0.264887	1.34691	1.22257	0.450488	0.216554		0.463727	0.210881		0.556132	0.244967		0.506376	0.153915
P07195	LDHB	1.13325	1.21962	1.16419	1.07363	1.05001	1.1471	1.26151	1.18784	1.10094	1.14135	1.37915	1.1415	1.13406		1.1499	0.0282851		1.18081	0.0412535		1.16416	0.0237163
Q8NC56	LEMD2	-0.59021	-0.883692	-0.719041	-0.680557	-0.891603	-0.828454	-0.911637	-0.883547	-0.789648	-0.807036	-0.972594	-0.650912	-0.707898		-0.786456	0.0468576		-0.801939	0.0474738		-0.793602	0.032086
O95202	LETM1	-0.103257	-0.0209229	-0.187846	-0.321437	0.032738	-0.12659	-0.365806	-0.080694	-0.0623002	-0.0714922	-0.281009	0.105826	0.0988221		-0.15616	0.0556169		-0.0484745	0.0581195		-0.106459	0.0415035
P09382	LGALS1	-0.118721	0.441156	0.0297459	-0.255021	0.010894	-0.108084	-0.169423	-0.131342	-0.00834967	-0.014544	-0.00108973	0.148189	0.0466572		-0.0242074	0.086056		0.00658688	0.0371527		-0.00999466	0.0477379
P17931	LGALS3	-0.165678	0.0687418	0.0101531	-0.552713	-0.636542	-0.351683	-0.0969062	-0.3128	-0.541617	-0.362227	-0.10085	-0.294432	-0.886933		-0.246375	0.103639		-0.416476	0.110332		-0.324883	0.0763678
Q08380	LGALS3BP	0.698556	0.463982	0.0942104	1.75667	0.498905	0.669397	0.160911	0.678559	0.672693	0.646027	0.03995	0.126693	0.175614		0.620376	0.208558		0.389923	0.124707		0.514013	0.125703
Q9H008	LHPP	0.935204	0.631044	0.405174	0.663271	0.822057	0.634964	0.588533	0.852056	0.675985	0.772657	0.681673	1.02672	0.971087		0.668607	0.0641799		0.830029	0.0600276		0.743109	0.0483897
Q9UPQ0	LIMCH1	0.050762	0.039154	-0.288821	0.20242	0.0353502	-0.0217493	-0.404658	0.069701	-0.0497279	-0.23102	-0.281009	0.548111	0.208463		-0.0553634	0.0805512		0.0440864	0.125418		-0.00946346	0.0705454
P48059	LIMS1	-0.266965	-0.241054	-0.450017	-0.579523	-0.258361	-0.530512	-0.593148	-0.256441	-0.308222	-0.737967	-0.422672	-0.174862	-0.465031		-0.417083	0.0597716		-0.394199	0.0813392		-0.406521	0.0473818
O14910	LIN7A	-0.016207	0.0209553	0.664675	0.107853	0.00780266	-0.047715	0.557332	0.0344627	0.109907	0.697339	0.363615	0.0447006	0.248612		0.184957	0.112082		0.249773	0.103481		0.214872	0.0743539
Q9NUP9	LIN7C	-0.0362534	-0.0501658	0.594815	0.0493458	0.137515	-0.0822742	0.162868	-0.0679151	0.0724105	0.145655	0.0656866	0.0514752	-0.00123014		0.110836	0.08814		0.0443471	0.0295732		0.0801487	0.0484903
Q05469	LIPE	0.496771	0.574196	0.126904	0.673746	0.397961	0.775242	-0.116587	0.389666	0.548574	0.260454	0.794897	0.128878	0.601496		0.418319	0.118979		0.453994	0.0990308		0.434785	0.0756543
P49257	LMAN1	0.0435028	-0.0217744	-0.39517	0.100429	-0.0920987	0.0551606	-0.394619	0.128037	-0.224068	-0.316663	-0.362908	0.111999	0.213098		-0.100653	0.0794241		-0.0750842	0.103715		-0.0888519	0.061486
Q12907	LMAN2	0.010894	0.0618678	-0.121198	-0.579523	-0.131809	-0.488964	-0.481256	0.0214788	0.0736289	-0.437204	-0.511645	-0.515725	-0.365681		-0.247141	0.0994027		-0.289191	0.109044		-0.266549	0.0705939
Q9BU23	LMF2	-0.13584	-0.17753	-0.400189	-0.350803	-0.188346	-0.131211	-0.407141	-0.137436	-0.228363	-0.542416	-0.351997	-0.390537	-0.49976		-0.255866	0.047149		-0.358418	0.0634175		-0.303198	0.0398715
P02545	LMNA	-1.20322	-1.21684	-1.26017	-0.835558	-1.26896	-1.03519	-1.44131	-1.22503	-1.41019	-1.23772	-1.24892	-1.1377	-1.17967		-1.18018	0.0730502		-1.23987	0.038026		-1.20773	0.0422916
P20700	LMNB1	-0.614242	-0.759777	-0.133307	-0.704214	-0.725643	-0.845761	-0.292612	-0.787229	-0.638804	-0.0652502	-0.440577	-0.870161	-0.835764		-0.582222	0.100339		-0.606298	0.125998		-0.593334	0.0759974
Q03252	LMNB2	-1.08393	-1.07393	-0.57825	-0.919078	-1.02449	-1.16659	-0.577622	-1.02542	-1.09579	-0.71814	-0.816362	-0.989172	-0.992999		-0.917697	0.0921009		-0.939648	0.0581098		-0.927828	0.0542506
P29536	LMOD1	-0.412249	-0.461455	-0.500929	-0.0749824	-0.147387	-0.468105	-0.662226	-0.482066	-0.459204	-0.424883	-0.77025	-0.277598	-0.59992		-0.389619	0.0781039		-0.50232	0.068332		-0.441635	0.0529467
Q9UIQ6	LNPEP	-0.243315	-0.300236	-0.290695	-0.17808	-0.458433	-0.327036	-0.313149	-0.331339	-0.33321	-0.4944	-0.229041	-0.705063	-0.497724		-0.301563	0.0324228		-0.431796	0.0692486		-0.361671	0.0394521
Q9C0E8	LNPK	0.0201539	0.0643088	0.0205545	-0.846031	0.188787	-0.914351	-0.610229	0.106072	0.280357	-0.561472	-0.71642	-0.793517	-0.814883		-0.296687	0.179193		-0.416644	0.197527		-0.352052	0.128243
P36776	LONP1	-0.0465371	0.0231529	-0.0693123	0.262554	0.0894282	0.0678111	0.155707	0.0924158	0.0364711	0.164618	0.142334	0.150035	0.168111		0.068972	0.0436384		0.125664	0.0210173		0.0951376	0.0257723
Q8NF37	LPCAT1	0.138206	0.212123	0.380721	0.419161	0.0811245	0.176907	0.515762	0.104569	0.0810873	0.488866	0.363615	0.270562	0.123383		0.274858	0.061683		0.23868	0.0671647		0.258161	0.0438063
Q92604	LPGAT1	-0.309728	-0.438077	-0.360447	-0.159597	-0.384683	-0.342994	-0.471786	-0.342579	-0.424597	-0.517426	-0.260021	-0.315645	-0.390737		-0.352473	0.0383539		-0.375168	0.0368722		-0.362947	0.0258489
O95237	LRAT	0.540096	0.623786	0.312908	0.511445	0.824617	0.509369	0.109544	0.604144	0.497964	0.832097	0.447202	0.710053	0.748033		0.490252	0.0858182		0.639916	0.0611312		0.559328	0.0562616
P02750	LRG1	1.41414	1.46627	0.508031	1.49152	0.8484	1.42657	0.387405	1.14525	1.1602	0.3495	0.835328	0.967977	1.68986		1.07748	0.183273		1.02468	0.179843		1.05311	0.123777
Q07954	LRP1	-0.272156	-0.37228	-0.623825	-0.264423	-0.293192	-0.490924	-0.598158	-0.331957	-0.265052	-0.686593	-0.651182	-0.458679	-0.427818		-0.416423	0.0582778		-0.470214	0.0689701		-0.441249	0.0434637
P30533	LRPAP1	-0.344232	-0.204177	-0.320946	-0.593665	-0.168542	-0.5476	-0.603424	-0.146456	-0.271414	-0.515475	-0.754366	-0.570658	-0.40207		-0.397512	0.0693351		-0.443406	0.0889855		-0.418694	0.0534853
P42704	LRPPRC	-0.213501	0.175739	0.0727516	-0.0884049	0.137515	-0.0611034	0.045944	0.102058	-0.261729	0.12228	0.01885	-0.00933421	-0.0606888		0.00984876	0.052019		-0.0147607	0.056771		-0.00150945	0.03689
Q8N1G4	LRRC47	0.00505928	0.0534284	0.0264695	-0.0413675	0.0308661	0.0258425	0.0591896	0.0361171	-0.0173937	0.146959	0.117523	0.171969	0.168111		0.022784	0.0127076		0.103881	0.0316769		0.0602134	0.0193041
Q8N9N7	LRRC57	0.365844	0.328694	0.405342	0.55357	0.180356	0.255228	0.386145	0.279565	0.348118	0.507055	0.3477	0.143945	0.140418		0.353597	0.0447706		0.294467	0.0570133		0.326306	0.0351733
Q96AG4	LRRC59	-0.0420133	-0.143327	-0.171872	-0.099812	-0.160643	-0.185953	0.0847539	-0.231702	-0.215349	-0.131894	0.0766327	-0.151491	-0.310243		-0.102695	0.0363691		-0.160674	0.054047		-0.129455	0.0314242
Q32MZ4	LRRFIP1	-0.220205	-0.687946	-0.810018	-0.242827	0.127386	-0.121331	-0.477275	-0.231702	-0.35225	-0.464044	-0.381288	-0.193896	-0.232234		-0.347459	0.124451		-0.309235	0.0433019		-0.329818	0.067533
Q9Y333	LSM2	0.719735	0.520201	0.493821	1.06325	0.732418	0.583117	0.596157	0.65832	0.564668	0.5861	0.605333	0.82291	0.665829		0.672672	0.0735894		0.650526	0.0381121		0.662451	0.0418029
Q9Y4Y9	LSM5	0.228449	0.24186	0.292115	0.432933	0.281467	0.179259	0.0487017	0.241393	0.237954	0.38071	0.105153	0.599994	0.224219		0.243541	0.0441837		0.298237	0.0701153		0.268785	0.0391531
Q9UK45	LSM7	0.416631	0.614853	0.721429	0.500471	0.515846	0.484103	0.695475	0.55316	0.570113	0.803388	0.62395	0.572953	0.499084		0.564115	0.0434005		0.603775	0.0431499		0.58242	0.0299626
O95777	LSM8	0.585761	0.327879	0.357794	-0.207302	0.651472	-0.504178	-0.373422	0.670454	0.472835	-0.262863	-0.440577	0.0049666	0.0386811		0.119715	0.178575		0.0805826	0.173094		0.101654	0.119913
P09960	LTA4H	0.667262	0.856746	0.909585	0.522238	0.725749	0.891371	0.727328	0.728848	0.727721	0.877937	0.844179	0.518734	0.459994		0.757183	0.052624		0.692902	0.0693321		0.727515	0.0418994
P02788	LTF	-0.0757654	0.201242	-0.205959	-0.401802	0.108835	-0.419013	-0.812266	-0.308157	0.369743	-0.44262	-0.725542	-0.570658	-0.615145		-0.229247	0.131784		-0.382063	0.161474		-0.299778	0.100864
Q9NQ29	LUC7L	-0.240138	-0.269992	-0.341037	-0.660502	-0.232089	-0.649019	-0.352237	-0.247523	-0.22749	-0.389759	-0.622533	-0.818837	-0.824429		-0.392145	0.0700085		-0.521762	0.110942		-0.451968	0.0635172
Q9Y383	LUC7L2	-1.09516	-1.33207	-0.571012	-0.47128	-1.23596	-0.426428	-0.3571	-0.830537	-1.31985	-0.394729	-0.548892	-0.411489	-0.621567		-0.784144	0.158469		-0.687845	0.142102		-0.739698	0.104098
O95232	LUC7L3	0.347148	0.200305	0.245763	0.906074	0.370383	0.515675	0.318635	0.416431	0.286921	0.488866	0.281151	0.54437	0.336872		0.414855	0.0902253		0.392435	0.0445584		0.404507	0.0508323
P51884	LUM	-0.865907	-0.663597	-1.02213	-0.81756	-0.654926	-0.861964	-1.12952	-0.883547	-0.906549	-1.0514	-0.937219	-0.582671	-0.597781		-0.859372	0.0657185		-0.826528	0.0783721		-0.844213	0.0486448
P07948	LYN	-0.661478	-0.777178	-0.361472	-0.38948	-0.983343	-0.504094	-0.110089	-0.727464	-0.604962	-0.227005	-0.253786	-0.399811	-0.358554		-0.541019	0.11		-0.428597	0.0811089		-0.489132	0.0691704
O75608	LYPLA1	-0.0726015	-0.108037	-0.0761501	-0.312465	-0.10592	-0.109708	-0.114338	-0.1383	-0.153813	-0.255898	-0.149006	-0.561221	0.722596		-0.12846	0.0313166		-0.0892736	0.175097		-0.110374	0.0786879
Q5VWZ2	LYPLAL1	0.369829	0.43487	0.343762	0.245299	0.315298	0.373759	0.638879	0.441181	0.341019	0.244281	0.341914	0.445269	0.35749		0.388814	0.0471249		0.361859	0.0305096		0.376373	0.0281416
Q8WZA0	LZIC	0.854397	0.694428	0.706008	1.22289	0.996197	0.829086	0.870369	0.658489	0.658503	1.06005	1.02398	1.64226	0.63949		0.88191	0.0688506		0.947129	0.159491		0.912011	0.0790958
Q9UPN3	MACF1	0.172062	0.0408478	0.208128	0.396423	0.188787	0.248624	0.00636782	0.122235	0.0561302	0.0841985	0.0968935	0.270562	0.160372		0.180177	0.0492783		0.131732	0.0312906		0.157818	0.0298443
O75367	MACROH2A1	-0.296239	-0.207723	0.768275	-0.03189	-0.483151	-0.219297	0.795481	-0.24595	-0.145892	0.352593	0.430761	-0.308523	-0.147326		0.0464938	0.196478		-0.0107228	0.13011		0.0200861	0.117118
Q9P0M6	MACROH2A2	-0.727975	-0.491471	0.0998563	-1.29471	-0.561182	-0.828454	0.339391	-0.779411	-0.681229	0.260454	-0.187266	-0.734459	-0.775872		-0.494935	0.210411		-0.482964	0.174771		-0.48941	0.133404
Q96A72	MAGOHB	-0.253159	-0.227362	0.207124	-0.316083	-0.280418	-0.299398	0.17019	-0.262964	-0.288378	0.178657	-0.0208978	-0.251887	-0.299315		-0.142729	0.0863586		-0.157464	0.0793586		-0.14953	0.0567757
P33908	MAN1A1	-0.327315	-0.418877	-0.560619	-0.380075	-0.266664	-0.219297	-0.702425	-0.235458	-0.322439	-0.597781	-0.605818	-0.474903	-0.28306		-0.410753	0.0641647		-0.41991	0.0662005		-0.414979	0.0441925
Q9Y2E5	MAN2B2	0.569655	0.463049	0.199044	1.10958	0.515259	0.862125	0.283901	0.537009	0.4246	0.177778	0.257887	1.06017	0.482124		0.571801	0.12055		0.489927	0.126886		0.534013	0.0845429
Q9NTJ4	MAN2C1	-0.0958841	-0.117448	-0.134346	-0.0611484	-0.0269103	0.256007	-0.131526	-0.109301	-0.15496	0.0554381	-0.158937	-0.125547	-0.103708		-0.044465	0.0522127		-0.0995025	0.0323557		-0.0698669	0.0315915
P55145	MANF	0.365235	0.415267	0.111414	0.0866366	0.262592	-0.200904	0.0241416	0.359705	0.198363	0.185572	-0.173853	0.293028	0.0541831		0.152055	0.0807433		0.152833	0.0778997		0.152414	0.0540578
P21397	MAOA	-0.499216	-0.957922	-0.16726	-0.913591	-0.720646	-0.894573	-0.223329	-0.762274	-0.638804	-0.249195	-0.446191	-0.989172	-0.849062		-0.62522	0.125606		-0.655783	0.110962		-0.639326	0.081454
P27338	MAOB	0.269555	0.120249	0.0503976	0.443696	-0.154115	0.446235	0.139964	-0.217331	-0.114968	0.00384965	-0.11456	0.469299	0.265403		0.187997	0.0818814		0.0486153	0.108026		0.123667	0.0667201
P78559	MAP1A	0.0159495	0.0299562	-0.219421	-0.0358628	0.0367789	-0.157378	-0.0364147	0.108037	-0.119481	-0.175456	-0.170889	0.256864	0.537683		-0.0523417	0.0374333		0.0727931	0.116794		0.00541279	0.057661
P46821	MAP1B	-0.143608	-0.273612	0.683292	-0.038822	-0.300582	-0.191653	0.682705	-0.126513	-0.0941273	0.504244	0.339525	-0.13701	-0.0877124		0.0596744	0.164181		0.066401	0.114661		0.062779	0.0989264
Q66K74	MAP1S	0.108414	0.162907	0.120738	0.480538	0.0173909	0.453631	-0.0294222	0.153836	0.107507	0.105566	0.230973	0.128878	0.28532		0.187742	0.0762211		0.16868	0.0300086		0.178944	0.0417713
P11137	MAP2	0.799174	0.472859	1.13348	0.259404	0.295902	-0.269306	1.50497	0.630795	0.71889	1.28475	0.65437	-0.244706	0.0777187		0.599497	0.224859		0.520304	0.218718		0.562946	0.151466
P36507	MAP2K2	1.03803	1.10318	0.529158	1.18464	1.0149	1.68957	0.702204	1.13876	0.973939	0.919079	0.965224	1.24996	1.22215		1.03738	0.139941		1.07819	0.0585508		1.05622	0.0772411
P27816	MAP4	0.0464795	-0.194583	0.164642	0.118245	-0.0134373	-0.0095077	0.434514	0.116584	-0.135214	0.396295	0.182113	0.163705	0.191719		0.0780505	0.0736048		0.152534	0.0697724		0.112427	0.0500968
P28482	MAPK1	0.0155512	0.213713	0.686365	0.0753272	0.0279589	0.104551	0.793512	-0.0947395	0.195624	0.823425	0.657411	0.165257	0.24303		0.273854	0.123355		0.331668	0.139501		0.300537	0.0889288
P27361	MAPK3	-0.239851	0.00842278	0.500657	0.187362	0.0523496	0.29368	0.816037	-0.139965	0.0250062	0.840686	0.695348	0.288941	0.43385		0.231237	0.131292		0.357311	0.154506		0.289425	0.0977795
P45984	MAPK9	0.438762	0.392645	0.178736	0.445162	0.490722	0.241116	0.00353773	0.506841	0.261037	0.0680216	0.103402	-0.0409152	1.11371		0.312954	0.0672897		0.33535	0.173937		0.323291	0.0839496
Q15691	MAPRE1	-0.208776	-0.0445895	-0.227191	-0.329984	-0.153306	-0.164259	-0.241135	0.00197885	0.0601443	-0.00950097	-0.111777	-0.154105	-0.0578516		-0.195606	0.0334092		-0.0451852	0.0321717		-0.126181	0.031115
Q15555	MAPRE2	-0.281205	-0.286386	-0.0265357	-0.137339	-0.284575	-0.342994	0.027017	-0.3104	-0.246527	-0.0389036	-0.116835	-0.382226	-0.269544		-0.190288	0.0548916		-0.227406	0.0518837		-0.20742	0.0368433
Q9UPY8	MAPRE3	-0.1109	-0.152551	0.603565	-0.00751289	-0.255493	-0.0283141	0.807397	-0.165898	-0.0418833	0.674845	0.225065	-0.296901	-0.136782		0.122313	0.155316		0.0430742	0.145037		0.0857412	0.103296
P10636	MAPT	0.0173177	-0.159066	0.608082	0.187362	-0.0726148	0.337338	0.743076	-0.0543817	0.0274711	0.794385	0.191535	-0.13251	0.0695901		0.237356	0.129774		0.149348	0.136628		0.196737	0.091019
Q9NX47	MARCHF5	0.230328	0.373463	0.15029	0.263851	0.172917	0.746048	0.215283	0.248867	0.339211	0.540068	0.675368	0.111999	0.598169		0.307455	0.0780518		0.418947	0.0898229		0.358913	0.0587297
P29966	MARCKS	-0.268161	0.329101	0.574958	-0.342815	0.0865369	-0.0982431	0.825112	0.129085	0.106057	0.527719	0.864795	0.314024	0.935398		0.15807	0.16557		0.479513	0.146998		0.306428	0.116944
P56192	MARS1	0.170069	0.110021	-0.00472802	0.0777797	0.14103	0.0170645	0.0789197	0.219203	-0.0162572	-0.0977325	-0.203479	-0.0336536	-0.0239023		0.0843081	0.0237819		-0.0259703	0.0568409		0.0334104	0.0320228
P31153	MAT2A	0.470225	0.468799	0.561602	0.490039	0.437734	0.509369	0.493256	0.496168	0.423183	0.52587	0.419706	0.498546	0.401947		0.490146	0.0147072		0.460903	0.0211952		0.47665	0.0127412
Q9NZL9	MAT2B	-0.0530198	-0.0914383	-0.181482	-0.00533652	-0.12335	0.603792	0.0093054	-0.126207	-0.1631	-0.156099	0.0236152	0.013671	0.00866759		0.0226387	0.100049		-0.0665754	0.0370237		-0.018537	0.0558875
P43243	MATR3	-0.167822	-0.263709	0.35304	0.0201115	-0.308515	-0.104245	0.234904	-0.231702	-0.114968	0.113987	0.0940907	-0.144605	-0.0773438		-0.0337478	0.0946175		-0.0600901	0.0559694		-0.0459058	0.0550188
Q96N66	MBOAT7	0.147483	-0.0921292	-0.143941	-0.256749	0.11087	-0.330724	-0.494481	-4.23846e-05	-0.0596192	-0.488702	-0.479012	-0.214963	-0.372417		-0.151382	0.0876471		-0.269126	0.0860557		-0.205725	0.0614777
P02686	MBP	-0.878969	-0.0180101	-1.00324	-0.960326	0.392756	-1.92849	-0.389869	-1.45468	-1.5204	-1.65337	-1.85521	-0.372267	-1.37351		-0.683735	0.286793		-1.37157	0.211422		-1.0012	0.201342
P43121	MCAM	-0.686677	-0.706345	-0.830924	-0.870829	-0.658301	-0.778376	-0.969047	-0.779411	-0.726502	-0.978578	-0.841214	-0.67922	-0.69756		-0.785786	0.0423408		-0.783747	0.0457936		-0.784845	0.0297662
Q9ULC4	MCTS1	0.400992	0.405662	0.112092	0.40315	0.374711	0.410641	-0.136783	0.415637	0.233436	0.293915	0.22666	0.240364	0.543704		0.281495	0.0806992		0.325619	0.0523541		0.30186	0.0481742
P40925	MDH1	0.786721	0.89192	1.07929	0.718135	0.898643	0.758478	0.817776	0.785015	0.809127	0.98273	0.716229	0.935566	0.813219		0.850138	0.0456448		0.840314	0.0406273		0.845604	0.0296706
P40926	MDH2	0.170069	0.332899	0.485376	0.378914	0.270221	0.32667	0.637835	0.185644	0.0860451	0.564569	0.482218	0.390697	0.487219		0.371712	0.057381		0.366066	0.0772751		0.369106	0.0451163
P48163	ME1	0.522005	0.819008	0.995442	0.638229	0.504272	0.282831	0.822334	0.698827	0.6315	0.994803	0.605333	0.599994	0.324744		0.654875	0.0912868		0.642533	0.0878575		0.649179	0.0610831
P23368	ME2	0.49559	0.209452	0.0504683	0.585489	0.44262	1.25487	-0.162468	0.416062	0.646745	0.413852	0.602414	0.412429	0.623096		0.410861	0.17253		0.519099	0.0473012		0.460817	0.0932038
Q16798	ME3	0.564176	0.393146	0.138165	0.133237	0.446422	0.206325	0.274482	0.386347	0.580076	0.176723	0.43538	-0.201067	0.290702		0.307993	0.0622751		0.278027	0.110707		0.294163	0.0584778
Q6P9B6	MEAK7	-0.12172	-0.0628475	0.0595928	0.161853	-0.0782061	0.13207	-0.0966515	-0.00929166	-0.0958897	0.181431	-0.025391	0.117597	0.304275		-0.00084427	0.0440261		0.0787884	0.0611036		0.0359093	0.0370296
P51608	MECP2	0.128886	0.0994238	0.298221	0.312339	0.109126	0.0818464	0.391083	0.100121	0.115694	0.342062	0.142334	0.063058	0.197169		0.202989	0.0478362		0.160073	0.0407376		0.183182	0.0311989
Q14696	MESD	0.15626	-0.14948	-0.228221	-0.492102	0.197661	-0.363348	-0.316869	0.0775388	-0.105564	-0.377731	-0.401832	-0.0904181	-0.671334		-0.170871	0.0985767		-0.261557	0.11101		-0.212726	0.071808
Q9H8H3	METTL7A	0.00533669	0.00616701	0.00616231	-0.714167	0.00616544	-0.883612	-0.720589	0.00618448	0.00616982	-0.704163	-0.866852	-1.02607	-0.950626		-0.327791	0.15872		-0.589226	0.193282		-0.448453	0.124025
P55001	MFAP2	-2.16934	-2.16803	-1.76754	-2.45065	-2.31177	-2.44957	-2.4493	-2.16781	-2.30959	-2.5712	-2.57135	-2.57125	-2.44998		-2.25232	0.0938063		-2.4402	0.0690126		-2.33903	0.0633726
Q08431	MFGE8	-1.15695	-1.09902	-1.03041	-1.39402	-1.10142	-1.41188	-1.01783	-1.14806	-0.985635	-1.04489	-1.14361	-1.55615	-1.46269		-1.17307	0.061949		-1.22351	0.0945915		-1.19635	0.0529772
Q9BY79	MFRP	0.929186	0.88678	0.370774	0.852488	0.968107	1.05356	0.458328	0.891857	0.667573	0.439706	0.749586	1.00483	1.07983		0.788461	0.0999488		0.805563	0.096333		0.796354	0.0669345
Q14728	MFSD10	-0.269991	-0.29682	-0.434533	-0.692812	-0.214941	-0.334614	-0.55564	-0.264334	-0.274123	-0.633557	-0.422672	-0.594057	-0.814883		-0.399907	0.0649589		-0.500604	0.0891388		-0.446383	0.0536105
Q8TDB4	MGARP	0.0537624	-0.0398995	0.75872	-0.10853	-0.0631769	-0.235387	0.286978	0.249632	0.357585	0.260738	0.0933462	-0.0798799	-0.14815		0.0932096	0.126572		0.122212	0.082784		0.106595	0.0751566
P26572	MGAT1	0.166954	0.24234	-0.185222	0.330285	0.0696465	0.35808	-0.412555	0.136818	0.153631	-0.279799	-0.293908	0.238807	0.396945		0.0813612	0.107674		0.058749	0.115596		0.0709248	0.0755094
P10620	MGST1	0.188282	0.120135	-0.129477	1.16733	0.0183949	0.494326	-0.572953	0.104426	0.0495039	-0.356425	-0.440577	0.0654455	0.224219		0.18372	0.205056		-0.0589014	0.110792		0.0717409	0.122067
Q99735	MGST2	0.0401656	0.0149419	-0.121689	0.223338	-0.0756045	0.26798	-0.0561822	0.0655952	-0.0860386	-0.397187	-0.0876223	-0.201067	-0.0141812		0.0418499	0.0566843		-0.120084	0.0661437		-0.0328887	0.0474287
O14880	MGST3	-1.18921	-0.748873	-0.441402	0.221937	-1.04102	0.501826	-0.37657	-1.13354	-0.980781	-0.014544	0.203851	-0.0464203	0.15296		-0.439044	0.236399		-0.303079	0.24242		-0.376291	0.163494
Q9BRT3	MIEN1	-0.256881	-0.257137	-0.425502	-0.49432	-0.135066	-0.486267	-0.747099	-0.234947	-0.259723	-0.342668	-0.533228	-0.246412	-0.260051		-0.400325	0.0769273		-0.312838	0.0467436		-0.359946	0.0466042
P14174	MIF	0.604774	1.54427	1.97488	0.282814	0.00616544	0.535595	0.54123	1.07758	1.16999	1.41603	1.28503	0.228904	0.687987		0.784247	0.267492		0.977588	0.18057		0.873481	0.162199
Q9UNW1	MINPP1	-0.015466	-0.16081	-0.0866202	-0.157939	0.0231438	0.0628503	-0.130643	-0.00664631	-0.137981	0.130818	-0.067025	-0.165532	-0.0272735		-0.0664976	0.0342075		-0.0456067	0.0433411		-0.0568557	0.0261786
Q14165	MLEC	0.181689	-0.00682805	-0.191855	0.0408986	0.0370144	0.0365835	-0.051352	0.293162	-0.0941273	-0.143886	-0.142693	0.0668553	8.20924e-05		0.00659299	0.0427004		-0.00343442	0.0683781		0.00196495	0.0373112
Q9H8L6	MMRN2	-0.614242	-0.759777	-0.800696	-0.214904	-0.496479	-0.473944	-0.625099	-0.42577	-0.563124	-0.559194	-0.648578	-0.277598	-0.304879		-0.569306	0.0747935		-0.46319	0.0617735		-0.52033	0.0497307
Q96T76	MMS19	0.191627	0.351655	0.431731	0.101884	0.100463	0.0353617	0.32052	0.270342	0.35206	0.239184	0.440761	0.0906596	0.245195		0.219034	0.0567781		0.273034	0.0481546		0.243957	0.037071
P22033	MMUT	0.785734	0.6314	0.313476	1.37195	0.767711	0.632567	0.339391	0.712703	0.607744	0.62086	0.328932	0.952354	0.924971		0.691747	0.13378		0.691261	0.0942449		0.691523	0.0807869
Q13724	MOGS	0.177173	-0.0748661	-0.195434	0.103269	-0.0362534	0.233834	0.030618	0.162072	-0.0114915	-0.194156	0.175699	-0.111374	0.0294568		0.0340487	0.0566252		0.00836774	0.0599494		0.0221959	0.0395988
O95563	MPC2	-0.178242	-0.296131	-0.299458	-0.355839	-0.349983	-0.383024	-0.030454	-0.204728	-0.346743	-0.547209	-0.14297	-0.905406	-0.671334		-0.270447	0.0472811		-0.469731	0.119525		-0.362425	0.0645886
O75352	MPDU1	-0.291776	0.21734	0.239374	-0.333486	-0.291239	-0.045473	0.0789197	0.0511984	0.0285196	0.293915	0.0725008	-0.515725	0.170685		-0.0609058	0.0936092		0.0168489	0.113795		-0.025019	0.0705311
P34949	MPI	0.384116	0.528198	0.680871	0.440731	0.421282	0.694159	1.14686	0.368631	0.510371	0.70817	0.991644	0.412429	0.347826		0.613746	0.100263		0.556512	0.102319		0.58733	0.0691929
P05164	MPO	-0.0757654	0.201242	-0.205959	-0.537967	0.108835	-0.678188	-0.9951	-0.308157	0.369743	-0.597781	-0.896271	-0.606072	-0.69756		-0.311843	0.166143		-0.456016	0.182439		-0.378385	0.119428
Q14168	MPP2	0.0681023	-0.322251	0.0648138	-0.094366	-0.0887213	-0.327036	0.0219334	-0.268493	-0.0652123	0.0468665	-0.39126	-0.50397	-0.355317		-0.0967892	0.0638669		-0.256231	0.0852315		-0.170378	0.0549697
Q6WCQ1	MPRIP	-0.338791	-0.27864	-0.280047	-0.50354	-0.53449	0.135412	-0.301208	-0.310977	-0.453727	-0.191098	-0.224633	-0.183196	-0.281059		-0.300186	0.0828594		-0.274115	0.0413416		-0.288153	0.0468104
P25189	MPZ	-0.504386	-0.0288014	-1.20341	-1.63392	-0.136758	-2.02398	-1.82679	-1.52138	-1.63418	-1.80175	-1.99785	-0.872561	-2.08751		-1.05115	0.3121		-1.65254	0.178569		-1.32871	0.199618
P22897	MRC1	-0.433458	-0.721353	-0.817609	-0.983921	-0.568347	-0.811024	-1.1329	-0.574327	-0.359109	-1.18938	-1.0959	-1.22232	-1.16185		-0.78123	0.0895514		-0.933814	0.151255		-0.851654	0.0839099
Q9UBG0	MRC2	-0.184815	-0.259453	-0.704619	-0.242798	-0.100129	-0.383024	-0.385206	-0.224335	-0.335651	-0.431059	-0.415034	-0.0879092	-0.49976		-0.322863	0.0743771		-0.332291	0.0621921		-0.327215	0.0472761
Q8NDA8	MROH1	-1.45594	-1.23553	-0.500929	0.0522505	-1.17454	0.0189455	0.233362	-1.23692	-1.47846	0.176025	0.133441	-0.145561	-0.0522574		-0.580339	0.266223		-0.433954	0.297692		-0.512777	0.191227
Q9H2W6	MRPL46	-0.181906	0.206019	-0.230857	-0.201956	0.216905	-0.0944999	-0.162966	0.0363884	-0.184432	-0.190215	-0.0707685	-0.0490902	-0.0538498		-0.0641802	0.0729182		-0.0853279	0.0356622		-0.0739407	0.0410531
P43246	MSH2	-1.38622	-1.26219	-1.50284	-2.3009	-1.3182	-1.76767	-1.80104	-1.46933	-1.48864	-1.90293	-1.7402	-1.05156	-1.53473		-1.61987	0.138504		-1.53123	0.117979		-1.57896	0.0894663
P52701	MSH6	-0.112172	-0.0675541	0.450068	-0.433888	-0.0947454	-0.294052	0.558624	-0.104702	-0.0959249	0.523418	0.473506	0.010993	-0.132235		0.000897312	0.139341		0.112509	0.123827		0.0524105	0.0918369
O43347	MSI1	0.564371	0.684461	0.796488	0.788614	0.712209	0.650071	0.963778	0.628057	0.586899	0.926106	0.659462	0.618581	0.774182		0.737142	0.048394		0.698881	0.0525545		0.719483	0.0345254
Q96DH6	MSI2	-0.0630365	-0.416816	-0.0448335	-0.109994	-0.394426	-0.265002	-0.0047619	-0.199279	0.00724625	0.0201452	-0.269943	-0.213469	-0.285616		-0.185553	0.0648495		-0.156819	0.0555672		-0.172291	0.0417508
P26038	MSN	-0.149343	0.0109339	-0.246073	-0.251733	0.142373	0.0192993	-0.233649	-0.0506889	-0.104373	-0.197523	0.0119062	0.0948592	0.100655		-0.10117	0.0597476		-0.0241941	0.0476927		-0.0656427	0.0390029
P00395	MT-CO1	-0.381769	-0.207723	-0.421542	-0.260096	-0.297104	-0.0274749	0.299941	-0.538363	-0.35225	0.180072	0.413654	-0.432025	-0.554186		-0.18511	0.0942861		-0.21385	0.167016		-0.198374	0.0881749
P00403	MT-CO2	0.0821926	-0.721353	0.10714	-0.0749824	-0.883484	-0.0202628	0.92653	-0.496632	0.293977	-0.376328	0.153522	-0.346947	-0.0293752		-0.0834599	0.225455		-0.133631	0.130684		-0.106616	0.130466
P03891	MT-ND2	-0.418991	-0.402983	0.31666	-0.492102	-0.535102	-0.312874	0.403722	-0.387198	-0.276144	0.230593	0.191535	-0.382226	-0.550163		-0.205953	0.14886		-0.1956	0.133573		-0.201175	0.0969499
P03905	MT-ND4	-0.123118	8.71166e-05	0.178284	-0.280788	-0.227038	-0.0120932	0.179426	-0.11987	-0.114075	0.333826	0.426029	-0.466409	-0.0167989		-0.0407486	0.068669		0.00711712	0.133895		-0.0186567	0.0690266
P03915	MT-ND5	-0.0361666	-0.0399685	-0.20034	0.100429	-0.105641	0.202716	-0.0777577	-0.132449	-0.0813564	-0.00729089	-0.0185589	-0.151491	0.11507		-0.0223898	0.0506901		-0.0460126	0.0400195		-0.0332926	0.0318015
Q13330	MTA1	-0.172756	-0.131163	0.0563053	-0.203602	-0.150287	-0.421066	-0.0696588	-0.176411	-0.178132	-0.276326	-0.339697	-0.19521	-0.207686		-0.156032	0.0547688		-0.22891	0.026735		-0.189668	0.0324814
Q13126	MTAP	-0.0904441	0.0902941	-0.2428	0.357307	-0.121978	-0.204755	-0.499303	-0.0156021	0.116856	-0.431059	-0.47036	-0.183196	-0.0689482		-0.101668	0.101969		-0.175385	0.0956912		-0.135691	0.0683583
Q969Z3	MTARC2	-0.679735	-0.259453	-0.379143	-0.675429	-0.478865	-0.665053	-0.835972	-0.378879	-0.638804	-0.714954	-0.783104	-0.66905	-0.540658		-0.567664	0.0762305		-0.620908	0.0585401		-0.592238	0.047773
Q9NZJ7	MTCH1	-0.27457	-0.279931	-0.366217	-0.369353	-0.317664	-0.345872	-0.180034	-0.308157	-0.236164	-0.292873	-0.361049	-0.547339	-0.73515		-0.304806	0.0253031		-0.413455	0.0777215		-0.354952	0.0397305
Q9Y6C9	MTCH2	-0.208776	-0.0489443	0.126795	-0.107996	-0.382242	-0.13995	0.342633	-0.214999	-0.0859476	0.293915	0.301048	-0.344133	-0.0578516		-0.0597829	0.0888816		-0.0179949	0.108083		-0.0404961	0.0664048
Q86UE4	MTDH	0.118235	0.0703119	-0.31145	0.10507	-0.030265	-0.0715421	-0.473501	0.0670327	0.0434402	-0.328095	-0.376965	0.0654455	-0.0308958		-0.0847344	0.0854877		-0.0933396	0.0834852		-0.088706	0.0575279
P11586	MTHFD1	-0.176004	-0.207723	-0.25199	-0.321437	-0.206095	0.2729	-0.0580094	-0.0180172	-0.227659	-0.542416	-0.260021	-0.340347	0.197169		-0.13548	0.0744469		-0.198549	0.105224		-0.164588	0.0608588
P42345	MTOR	-0.314514	-0.279931	-0.219608	-0.350803	-0.616319	-0.104245	-0.205427	-0.268493	-0.373784	-0.161197	-0.140117	-0.394576	-0.287509		-0.298692	0.0611335		-0.270946	0.0429347		-0.285886	0.0371031
Q765P7	MTSS2	0.00063835	0.00202509	-0.126985	0.25295	-0.143423	0.17801	-0.0271007	-0.041259	-0.051648	-0.0931375	0.19646	-0.0491747	0.0777187		0.019445	0.055733		0.00649331	0.0446641		0.0134673	0.0349768
Q14764	MVP	-0.337905	-0.290393	-0.581344	-0.47128	-0.331855	-0.616531	-0.605706	-0.164625	-0.316826	-0.786318	-0.574755	-0.469814	-0.57792		-0.462145	0.053596		-0.48171	0.089176		-0.471175	0.0480687
P20591	MX1	0.217292	0.0843277	-0.300675	0.110563	0.0271431	0.152367	-0.456559	0.0901175	0.105588	-0.338713	-0.161746	0.0468533	-0.0202477		-0.0236487	0.0957974		-0.0463579	0.0706799		-0.0341298	0.0586699
Q9BQG0	MYBBP1A	-0.387164	-0.538105	-0.351504	0.0393396	-0.31144	0.076544	-0.27186	-0.468252	-0.488169	-0.10573	-0.153276	-0.0149909	0.112227		-0.24917	0.0854565		-0.186365	0.0994433		-0.220183	0.0628455
O75592	MYCBP2	-0.170918	-0.169872	-0.0228423	0.0311182	-0.26269	-0.204755	-0.0221854	-0.169676	-0.235882	-0.159932	0.042264	-0.216598	-0.118341		-0.117449	0.0420946		-0.143028	0.0408138		-0.129255	0.0284772
Q9P2K5	MYEF2	-0.0291779	0.122877	0.643475	-0.0307679	-0.0380815	0.197708	0.495304	0.0174746	0.132362	0.704886	0.239469	-0.0713184	0.0524634		0.194477	0.103748		0.179223	0.1136		0.187436	0.0733788
Q9HB07	MYG1	0.726992	0.803822	0.830276	0.735271	0.901577	0.70332	0.756838	0.695606	0.699003	1.06272	0.731813	0.949816	0.845488		0.779728	0.0263233		0.830741	0.0615398		0.803273	0.0311247
P35580	MYH10	-0.775353	-0.668612	-0.575023	-0.473989	-0.54132	-0.716991	-0.620276	-0.609771	-0.797507	-0.661795	-0.759005	-0.263508	-0.538045		-0.624509	0.0394292		-0.604938	0.0785546		-0.615476	0.0401645
P35749	MYH11	-1.18277	-1.26799	-0.934012	-1.06455	-1.13237	-1.27634	-1.62157	-1.11498	-1.34216	-1.15073	-1.29091	-1.12845	-1.21134		-1.21137	0.0818285		-1.20643	0.0379168		-1.20909	0.045604
Q7Z406	MYH14	-0.393861	-0.902273	-0.707894	-0.432625	-0.692215	-0.558494	-0.485932	-0.682036	-0.838244	-0.471986	-0.415034	-0.444469	-0.358186		-0.596185	0.0684268		-0.534993	0.0755862		-0.567942	0.0493645
P35579	MYH9	-1.10622	-1.34322	-1.39159	-1.20693	-1.24492	-1.32887	-1.3875	-1.1878	-1.18396	-1.37966	-1.24892	-1.24484	-1.23522		-1.28703	0.039885		-1.24673	0.0289971		-1.26843	0.0249726
O14950	MYL12B	-0.735842	-0.593121	-0.794144	-1.38457	-0.485522	-1.02935	-0.794694	-0.436643	-0.638804	-1.03797	-0.59456	-0.570658	-0.966693		-0.831035	0.1127		-0.707555	0.0976316		-0.774044	0.0746218
P60660	MYL6	-0.649687	-0.652952	-0.632024	-1.17242	-0.537786	-0.991301	-0.740361	-0.637312	-0.554172	-0.69756	-0.59456	-0.676219	-0.790267		-0.768076	0.0863137		-0.658348	0.0339724		-0.717432	0.0497703
P24844	MYL9	-0.852993	-1.03115	-0.745295	-0.973632	-0.548654	-0.878384	-0.979284	-0.64168	-0.604962	-0.724857	-0.656639	-0.615335	-0.767791		-0.858484	0.0630374		-0.668544	0.0263049		-0.770819	0.0441597
Q15746	MYLK	-0.067623	-0.0156376	0.0345586	-0.0431172	0.241766	-0.211835	-0.864332	-0.0214147	-0.183309	-0.454434	-0.571387	0.244774	-0.213028		-0.132317	0.132351		-0.1998	0.120115		-0.163463	0.0870916
Q92614	MYO18A	-0.118721	0.0429878	-0.358625	-0.448251	-0.0420133	-0.365554	-0.481256	-0.116914	0.000791075	-0.334457	-0.274589	-0.463069	-0.304879		-0.253062	0.0793131		-0.248853	0.0675149		-0.251119	0.0507008
O43795	MYO1B	-0.661478	-0.582592	-0.593965	-0.54963	-0.625426	-0.5506	-0.476381	-0.757629	-0.503929	-0.316663	-0.496814	-0.432025	-0.639199		-0.577153	0.0225573		-0.524377	0.0633621		-0.552795	0.0310925
O00159	MYO1C	-0.985427	-1.05431	-1.17476	-0.866117	-1.18592	-0.934828	-1.09071	-1.00114	-0.991427	-1.10963	-0.957254	-1.04283	-0.962454		-1.04172	0.0453776		-1.01079	0.0234284		-1.02745	0.0260721
O94832	MYO1D	-0.9072	-0.678591	-0.926867	-1.27724	-0.447619	-0.975388	-0.911637	-0.465283	-0.404225	-0.997284	-0.828403	-1.22232	-1.11285		-0.874935	0.0973671		-0.838394	0.138539		-0.85807	0.0791897
O00160	MYO1F	0.120225	0.460202	-0.291014	-0.490425	0.203771	-1.12102	-0.717439	0.0753221	0.494609	-0.91115	-0.871692	-0.738835	-1.00457		-0.262243	0.211737		-0.492719	0.254215		-0.368616	0.159995
Q9Y4I1	MYO5A	-0.247346	-0.263709	-0.14571	-0.00247347	-0.256987	-0.229038	-0.255525	-0.42577	-0.348678	-0.32695	-0.362908	-0.0989943	-0.264708		-0.200113	0.0363312		-0.304668	0.0463283		-0.248369	0.0315361
Q9UM54	MYO6	-0.202395	-0.242047	0.35304	-0.0106762	-0.265426	-0.135127	0.146666	-0.108711	-0.201169	0.280805	-0.0401983	-0.106671	-0.0639656		-0.0508522	0.0867977		-0.039985	0.0679784		-0.0458366	0.054032
Q13402	MYO7A	0.0920979	0.167227	-0.0521029	0.0270856	0.322093	-0.0244141	-0.0380615	0.108048	0.0308856	-0.0337658	-0.0573996	0.0902253	0.0768776		0.0705608	0.0513699		0.0358118	0.0279398		0.0545228	0.0297589
Q13459	MYO9B	-0.30503	-0.331336	-0.602584	-0.242798	-0.312524	-0.616531	-0.740361	-0.248291	-0.290939	-0.71814	-0.693908	-0.506937	-0.597781		-0.450166	0.0743629		-0.509333	0.0819219		-0.477474	0.0534034
Q9NZM1	MYOF	-0.97204	-0.9884	-0.910849	-0.853229	-0.957253	-0.914351	-0.810022	-0.920274	-0.972834	-0.824429	-1.08581	-0.351391	-0.942395		-0.915163	0.0245336		-0.849522	0.105425		-0.884867	0.0488741
Q8NFW9	MYRIP	0.923934	0.788698	-0.048746	0.150526	0.683036	0.0863562	-0.0350338	1.03644	0.39258	-0.167815	-0.0185589	0.194363	-0.0141812		0.36411	0.157957		0.237139	0.178644		0.305508	0.114842
P0DOX5	N/A	1.48472	2.25861	1.10386	1.6227	1.66405	1.814	0.872606	2.25846	2.48594	0.961552	1.50241	1.56305	1.85742		1.54579	0.172665		1.77147	0.225597		1.64995	0.137363
P0DOX7	N/A	2.48814	1.60861	0.377681	0.954693	1.91518	0.684487	-0.310527	1.66266	1.81532	0.0627639	-0.253025	0.76389	0.845488		1.10261	0.363684		0.816182	0.338094		0.970412	0.243498
P0DOX6	N/A	1.36304	0.888762	0.411046	2.09679	0.978973	1.06551	0.951717	0.839679	0.988279	-0.118669	0.411984	1.56261	0.151041		1.10798	0.196362		0.639154	0.250268		0.891597	0.16425
P0DOX2	N/A	0.717433	0.202663	0.0369937	1.34043	0.692755	0.666794	0.0361967	0.52769	0.740718	0.156493	-0.153276	0.880895	0.86356		0.52761	0.178028		0.50268	0.171337		0.516104	0.119127
Q9BXJ9	NAA15	0.207464	0.200539	0.30346	0.121321	0.253855	0.0428469	0.429477	0.21997	0.13076	0.587411	0.399895	0.510712	0.20149		0.222709	0.0472072		0.341706	0.0755642		0.277631	0.0446241
E9PAV3	NACA	-0.332382	-0.379719	-0.29565	-0.207302	-0.319314	-0.500933	-0.182593	-0.368728	-0.30458	-0.555889	-0.385145	-0.444469	-0.156099		-0.316842	0.0404032		-0.369152	0.0548819		-0.340985	0.0327933
Q4G0N4	NADK2	-0.0392157	-0.0265991	-0.0541729	-0.132245	-0.0560175	0.0525288	0.106677	-0.0129063	-0.0948253	-0.0245465	-0.0337981	-0.00214084	0.11507		-0.021292	0.0295896		-0.0088578	0.028094		-0.0155532	0.0197663
Q13564	NAE1	0.348459	0.337263	0.200797	0.581098	0.337658	0.535595	0.0963162	0.346456	0.335794	0.219485	0.247404	0.507257	0.569859		0.34817	0.0645059		0.371043	0.0572088		0.358726	0.0419583
Q9UJ70	NAGK	0.172062	0.0445867	-0.0307611	-0.101471	0.28604	-0.160556	0.087356	0.119266	0.0902461	0.0652148	-0.00448302	0.0159718	0.0624408		0.0424652	0.0588463		0.0581094	0.0187399		0.0496856	0.0317005
P54802	NAGLU	0.436284	0.153883	-0.184357	1.02101	0.14797	0.577647	-0.201017	0.555861	0.282212	-0.0575053	0.0218713	0.722727	0.35749		0.278775	0.164928		0.313776	0.122721		0.294929	0.101218
P43490	NAMPT	0.67185	0.649161	0.168658	0.00448194	0.460009	0.216526	-0.0466909	0.79349	0.619231	-0.232561	0.241773	-0.0409152	0.00496788		0.303428	0.110997		0.230998	0.164028		0.269999	0.0927345
Q9NR45	NANS	0.529328	0.234285	0.0187434	0.437443	0.611438	0.603792	0.295917	0.56325	0.306808	0.310663	0.380512	0.993733	0.858023		0.390135	0.0827122		0.568832	0.120413		0.47261	0.0727428
P55209	NAP1L1	0.138697	0.14872	0.396131	0.0640024	-0.0256688	0.10792	0.475134	0.106072	0.149828	0.279653	0.311329	0.128878	0.108309		0.18642	0.0685154		0.180678	0.0371053		0.18377	0.0391065
Q99733	NAP1L4	0.864439	0.82295	0.712912	0.575644	0.986979	0.481617	0.420847	0.914045	0.932802	0.376999	0.327228	0.505835	0.498008		0.695055	0.0795212		0.592486	0.108389		0.647716	0.0646503
P54920	NAPA	0.0949593	-0.0748661	0.0747718	0.0928138	-0.0972577	0.0192993	0.176031	0.0643404	0.00930407	0.0294568	0.083303	-0.0181776	-0.159125		0.0408217	0.0371551		0.00151694	0.0354357		0.022681	0.0253997
Q9H115	NAPB	-0.404682	-0.413045	0.305083	-0.196028	-0.341238	-0.283788	0.496636	-0.4801	-0.327956	0.498404	0.0656521	-0.317018	-0.262217		-0.11958	0.138822		-0.137206	0.146864		-0.127715	0.0966584
Q99747	NAPG	0.172062	0.027344	0.263533	-0.184871	-0.193887	0.0910608	0.269304	-0.12878	-0.0676669	0.12228	0.078529	-0.268585	-0.0829292		0.0635065	0.0730553		-0.0578586	0.0580838		0.00749183	0.0488953
Q6XQN6	NAPRT	0.758505	0.527943	0.228296	0.915941	0.494818	0.701016	0.175353	0.62808	0.634649	0.379372	0.178439	1.09148	0.88072		0.543125	0.103193		0.632124	0.13448		0.584201	0.0806777
O43776	NARS1	0.250738	0.338122	-0.00162416	0.472771	0.107202	0.448536	0.433115	0.309269	0.289628	0.293915	0.40612	0.492925	0.232995		0.292694	0.0692282		0.337475	0.0386329		0.313362	0.0402349
P49321	NASP	0.636989	0.666068	0.430418	0.621014	0.698006	0.707521	0.482559	0.677098	0.519675	0.65955	0.488167	0.813359	0.736123		0.606082	0.0407174		0.648995	0.0510219		0.625888	0.0313866
Q8IW45	NAXD	-0.129764	-0.18409	-0.14964	-0.321437	-0.225763	-0.0715421	-0.0134677	-0.12878	-0.156602	-0.0356577	0.00780376	-0.129914	-0.299315		-0.156529	0.0381727		-0.123744	0.0436013		-0.141398	0.0279314
Q8NCW5	NAXE	0.370805	0.528213	0.359791	1.03976	0.580045	1.22173	0.382105	0.415334	0.409988	0.462218	0.588332	0.748226	0.757405		0.64035	0.131999		0.563584	0.0653495		0.604919	0.0750622
A2RRP1	NBAS	-0.11154	-0.0445895	-0.326105	-0.079295	-0.0523662	0.106317	-0.180034	-0.0779177	-0.151943	-0.0818309	-0.00889505	0.063058	-0.12476		-0.0982305	0.0502316		-0.0637147	0.0322062		-0.0823001	0.0300577
P61601	NCALD	0.0615975	0.100339	0.380631	0.303625	0.0875859	-0.0812709	0.321848	-0.124839	0.0710351	0.553392	0.191535	0.540736	0.136646		0.167765	0.0639526		0.228084	0.109923		0.195605	0.0591621
P13591	NCAM1	-1.04102	-0.860875	0.273842	-0.444869	-1.14082	-0.598571	0.297277	-0.975482	-0.756722	0.464718	-0.0351493	-0.50397	-0.352124		-0.502148	0.222582		-0.359788	0.211556		-0.436444	0.14955
Q09161	NCBP1	0.346122	0.364966	0.281961	0.0703911	0.355293	0.486515	0.405785	0.328562	0.313928	0.303647	0.327228	0.252461	0.405548		0.330148	0.0492967		0.321896	0.0202389		0.326339	0.0271009
Q6ZVX7	NCCRP1	0.803045	0.517915	-0.719041	0.183627	0.298014	0.192985	-0.373422	-0.553582	-0.373784	-0.268339	-0.636528	-0.220754	0.0582434		0.129018	0.195961		-0.332457	0.102029		-0.0839707	0.129426
Q9UBB6	NCDN	0.0780743	0.132148	0.34429	0.0170035	0.195177	0.148405	0.269304	0.0573192	0.0670649	0.405944	0.239469	0.324621	0.0413538		0.1692	0.042152		0.189295	0.0637735		0.178475	0.035621
Q6PIU2	NCEH1	0.177173	-0.190974	0.466672	0.16457	0.233751	0.402329	0.176782	0.335598	0.107893	0.231892	0.160109	0.0685611	0.107231		0.204329	0.0799159		0.168547	0.0405896		0.187814	0.0454181
Q9Y2A7	NCKAP1	0.0589802	0.0293464	-0.257817	-0.0358628	-0.0738653	-0.0553043	-0.276785	0.0280717	-0.0022851	-0.0977325	-0.204907	-0.0722206	0.0871445		-0.0873297	0.0497218		-0.0436548	0.0423112		-0.067172	0.0323943
P19338	NCL	-0.219298	0.0966782	0.326083	-0.229155	0.0615975	-0.215594	0.326188	-0.131342	0.04197	0.240552	0.160109	0.153878	0.0107117		0.0209284	0.0938449		0.0793131	0.0543329		0.0478751	0.0548578
Q969V3	NCLN	0.612086	0.549964	0.125794	0.858842	0.507354	0.672047	0.336624	0.653429	0.622047	0.0909937	0.552708	0.49704	0.734369		0.523245	0.0894988		0.525098	0.0930338		0.5241	0.061815
Q92542	NCSTN	-0.0175683	-0.0839277	-0.447338	-0.240193	-0.12706	-0.308662	-0.540421	-0.0310326	-0.197024	-0.536594	-0.507758	-0.280668	-0.191329		-0.252167	0.0729497		-0.290734	0.0803649		-0.269967	0.0520152
Q9BTX1	NDC1	-0.217635	-0.190742	-0.366506	0.152706	-0.257058	-0.296496	-0.505933	-0.18876	-0.222478	-0.45236	-0.344865	-0.0336536	-0.291623		-0.240238	0.0767418		-0.255623	0.0585391		-0.247339	0.0474288
Q92597	NDRG1	0.389835	0.62452	0.735861	0.219961	0.44426	0.197708	0.85067	0.460446	0.588305	0.500501	0.713329	0.305253	0.440167		0.494688	0.0949878		0.501334	0.0566767		0.497755	0.0552073
Q9UN36	NDRG2	0.323906	0.643534	0.666734	0.628622	0.70029	0.719618	0.913141	0.697548	0.599621	0.636861	0.91007	0.509588	0.728306		0.656549	0.066087		0.680332	0.0556582		0.667526	0.0422293
O95299	NDUFA10	-0.0942472	-0.0892429	0.165981	-0.196028	-0.129407	-0.508138	0.420847	-0.0568036	-0.0607391	-0.0628781	0.341914	-0.407352	-0.361166		-0.0614622	0.110026		-0.101171	0.10996		-0.0797892	0.0749476
Q9UI09	NDUFA12	-0.0627592	0.105559	-0.0441572	-0.147976	0.20574	-0.142083	-0.165155	-0.3128	-0.138961	-0.0479108	-0.136919	0.0578299	-0.0526951		-0.0358331	0.0533927		-0.105243	0.0509448		-0.0678683	0.0369649
Q9P0J0	NDUFA13	-0.233844	-0.550002	-0.0915001	-0.103204	-0.277568	-0.123515	-0.153002	-0.44065	-0.261729	-0.0340883	-0.208685	-0.0804522	-0.193856		-0.218948	0.0610135		-0.203243	0.0587625		-0.2117	0.0408828
O00483	NDUFA4	0.588132	0.292314	0.779326	0.0676522	-0.0460821	1.57716	1.15811	0.100859	0.532396	0.798998	0.85218	0.071121	0.257904		0.630944	0.222935		0.435576	0.140409		0.540774	0.134025
Q16718	NDUFA5	-0.15681	-0.190974	0.225906	0.338413	-0.287863	0.076544	0.537274	-0.273238	-0.274344	0.3129	0.45931	0.287437	0.33224		0.0774986	0.115672		0.140717	0.13329		0.106676	0.0842716
P56556	NDUFA6	-0.18023	-0.121419	0.252137	-0.126692	-0.187041	-0.235696	0.173185	-0.174336	-0.152181	0.298571	0.0203909	-0.127847	-0.159125		-0.0608223	0.0726184		-0.0490878	0.0753482		-0.0554063	0.050144
P51970	NDUFA8	0.245297	0.124007	0.328381	0.0843173	0.182408	0.0505775	0.373212	0.131031	0.191672	0.383182	0.402058	0.0374467	0.132687		0.198314	0.0463706		0.213013	0.060318		0.205098	0.0358197
Q16795	NDUFA9	-0.190341	-0.308395	-0.0191377	-0.409374	-0.166547	-0.283788	0.0963162	-0.20977	-0.0278915	0.0437848	-0.119135	-0.540399	-0.517426		-0.183038	0.065886		-0.228473	0.101235		-0.204008	0.0564121
O14561	NDUFAB1	0.574395	0.636118	0.888583	0.0311182	0.565829	0.526141	1.30646	0.609179	0.630421	0.470152	1.30795	0.349365	0.720544		0.64695	0.146316		0.681269	0.136234		0.66279	0.0967334
O96000	NDUFB10	0.0976367	0.171196	-0.116007	0.337494	0.259389	1.20695	-0.087863	0.22349	0.154919	0.241911	-0.138185	0.579366	0.0988221		0.266971	0.168962		0.193387	0.0953244		0.233009	0.0977018
O95168	NDUFB4	-0.0682211	-0.214234	-0.137136	-0.135266	-0.163849	-0.177039	-0.286766	-0.213772	-0.172198	-0.126678	-0.372263	-0.237464	-0.0808075		-0.16893	0.0259651		-0.200531	0.0414817		-0.183515	0.023089
O95139	NDUFB6	0.439595	0.466274	0.126321	0.287208	0.367259	0.395787	-0.0444838	0.387196	0.390469	0.471386	0.00219471	0.280661	0.380331		0.291137	0.0705893		0.318706	0.0679648		0.303861	0.0473877
P28331	NDUFS1	0.29464	0.316283	0.523244	0.298958	0.159844	0.166689	0.735228	0.298385	0.246748	0.579733	0.655928	0.202958	0.0652148		0.356412	0.0778728		0.341494	0.0934494		0.349527	0.0575904
O75306	NDUFS2	0.12791	-0.0398995	0.0252537	0.170064	-0.04055	0.248624	0.157187	-0.0278197	0.0585147	-0.226614	0.156131	-0.218693	-0.188573		0.0926557	0.0424217		-0.0745091	0.0658295		0.0155027	0.04355
O75489	NDUFS3	0.0756381	-0.08229	-0.0732983	-0.143569	0.195598	-0.0789121	0.204721	-0.113662	0.00485639	-0.0466288	0.217653	0.00163231	-0.107605		0.0139839	0.0542273		-0.00729225	0.0495823		0.00416415	0.0356909
O43920	NDUFS5	-0.438408	-0.41549	0.308472	-0.404447	-0.324166	-0.512853	0.399407	-0.415447	-0.34579	0.393978	0.184931	-0.19521	-0.0960991		-0.198212	0.144435		-0.0789397	0.128002		-0.143163	0.0951946
O75251	NDUFS7	-0.234975	-0.258811	-0.242978	0.219961	-0.29366	-0.436389	-0.468905	-0.233088	-0.305304	-0.346144	-0.505288	-0.426346	-0.244119		-0.245108	0.0853026		-0.343381	0.0434251		-0.290465	0.0502167
O00217	NDUFS8	0.914457	0.512473	0.33621	1.53193	0.778321	0.673288	0.881145	0.563391	0.462432	0.546788	0.883471	1.78486	0.635561		0.803975	0.143891		0.81275	0.203062		0.808025	0.116214
P49821	NDUFV1	-0.365002	-0.399141	-0.0565481	-0.0329222	-0.308515	-0.277237	0.12615	-0.44065	-0.427588	-0.0327895	-0.106946	-0.263508	-0.12476		-0.187602	0.0753429		-0.232707	0.070617		-0.20842	0.0502934
P19404	NDUFV2	0.0232702	-0.0156376	0.131867	0.0231444	-0.402933	-0.118709	0.146666	0.125262	0.0474992	-0.121928	-0.0167793	-0.0692455	-0.111993		-0.0303332	0.070749		-0.0245307	0.0395059		-0.0276551	0.0406011
Q9NVZ3	NECAP2	-0.351593	-0.461141	-0.467499	-0.5009	-0.20879	-0.473944	-0.707252	-0.404512	-0.241882	-0.633557	-0.704613	-0.313267	-0.495403		-0.453017	0.0572329		-0.465539	0.073759		-0.458797	0.0439474
Q96PU5	NEDD4L	0.103849	-0.051555	-0.0714459	0.0727474	-0.0589774	0.202716	-0.0073029	0.0265074	0.04107	-0.13402	0.122627	-0.179201	-0.0436899		0.0271473	0.0388237		-0.0277846	0.0464679		0.00179413	0.0297245
Q15843	NEDD8	0.600513	0.650916	0.66353	0.390691	0.696976	0.668454	0.534632	0.615835	0.557838	0.825818	0.725548	0.90492	0.6444		0.600816	0.0404726		0.712393	0.0541414		0.652313	0.0355324
P12036	NEFH	-0.679735	-0.412431	-0.858648	-0.510253	-0.432246	-0.736497	-0.80277	-1.13954	-1.13056	-1.07588	-0.834548	-0.526541	-0.913836		-0.633226	0.0684268		-0.936817	0.0961394		-0.773345	0.0703339
P07196	NEFL	-0.280139	-0.156539	-0.662438	-1.01614	-0.00227604	-1.12977	-0.623147	-0.73914	-0.806066	-1.22544	-1.3843	-0.319014	-1.43271		-0.552922	0.161761		-0.984446	0.178298		-0.752087	0.130441
P07197	NEFM	-0.580428	-0.346308	-0.69359	-0.99986	-0.331855	-1.48671	-0.776595	-0.883547	-0.828959	-1.59305	-1.69054	-0.308523	-1.73971		-0.745049	0.152398		-1.17405	0.239089		-0.943051	0.145112
P48681	NES	-0.715703	-1.01014	-0.617174	-0.242798	-0.62117	-0.383024	-0.569322	-0.617748	-0.74065	-0.431059	-0.661604	-0.224035	-0.361166		-0.594191	0.0922891		-0.506044	0.0812113		-0.553508	0.0610111
P21359	NF1	-0.413412	-0.334268	-0.511702	-0.448251	-0.249716	-0.402627	-0.537557	-0.239357	-0.367437	-0.651742	-0.680937	-0.515725	-0.561472		-0.413933	0.0376264		-0.502778	0.0695824		-0.454939	0.0384153
O94856	NFASC	0.313564	0.0287684	0.462432	0.651682	0.116459	0.315491	0.674081	0.0474329	0.276874	0.531426	0.438531	0.121769	0.262496		0.366068	0.0934936		0.279755	0.0747858		0.326231	0.0598599
P25208	NFYB	-0.0465878	-0.176459	0.316045	0.199085	-0.144732	-0.316882	0.581006	-0.185852	-0.0657915	0.496922	0.312771	0.083025	-0.134306		0.0587821	0.120274		0.0844615	0.110417		0.0706341	0.0790754
P08138	NGFR	0.15626	0.312448	1.12696	0.141812	0.62882	0.0232741	0.714414	0.566247	0.566672	0.861461	0.476031	0.269258	0.102374		0.443427	0.149773		0.473674	0.107587		0.457387	0.091018
Q8NBF2	NHLRC2	0.78462	0.793568	0.19836	0.76979	0.623685	1.08105	0.129949	0.857913	0.647564	0.0750774	0.369544	0.786709	0.33224		0.62586	0.130012		0.511508	0.123424		0.573082	0.0880408
Q9BZQ8	NIBAN1	-0.161758	0.00511629	-0.548146	-0.218635	-0.050374	0.157353	-0.416607	-0.238277	-0.177969	-0.166468	-0.0291399	0.298151	0.136646		-0.17615	0.0923392		-0.0295094	0.0855084		-0.10847	0.0643975
Q96TA1	NIBAN2	0.715021	0.406105	-0.0804909	0.475967	0.745511	0.334155	-0.0674926	0.387309	0.420731	0.0216627	0.284303	0.81125	0.378364		0.361254	0.126083		0.383937	0.104109		0.371723	0.0798434
P14543	NID1	-1.29198	-1.23553	-1.04349	-1.22625	-1.11165	-1.28743	-1.19108	-1.16227	-1.16513	-1.25114	-1.26735	-1.08377	-1.19935		-1.1982	0.0346455		-1.18817	0.027362		-1.19357	0.0216615
Q14112	NID2	-0.895387	-1.01564	-0.97916	-1.01614	-0.97204	-1.18664	-1.09071	-0.861997	-1.02722	-1.26035	-1.01742	-0.938316	-1.02985		-1.02225	0.035276		-1.02252	0.0546269		-1.02237	0.0301479
Q9GZT8	NIF3L1	0.838001	0.565769	0.695544	-0.094366	0.959944	0.535595	0.356283	0.600705	0.852696	0.422022	0.199731	0.071121	-0.00729089		0.550967	0.131418		0.356497	0.135216		0.461212	0.0945993
Q9BPW8	NIPSNAP1	0.0639143	0.00543986	-0.129946	0.314488	0.0218681	0.569869	0.00474495	0.0113166	-0.0186343	0.197492	-0.122467	0.0317104	0.154681		0.121483	0.0902178		0.0423498	0.0478356		0.0849598	0.0525459
Q9Y2I1	NISCH	0.350288	0.308224	-0.111807	0.0147381	0.192935	0.035099	-0.270059	0.22389	0.201095	-0.224817	-0.114974	0.00491208	-0.0329034		0.0742026	0.0849744		0.00953385	0.0718538		0.0443555	0.0549865
Q86X76	NIT1	0.176758	0.135531	0.432521	-0.0917127	0.159137	-0.0611034	0.441525	0.128468	0.135642	0.564569	0.216242	0.222043	0.0508509		0.17038	0.0795667		0.219636	0.0736774		0.193113	0.052902
Q9NQR4	NIT2	0.543677	0.54877	0.184011	0.421461	0.662451	0.583117	0.379509	0.601482	0.447114	0.466976	0.38797	0.663748	0.964683		0.474714	0.0604832		0.588662	0.0860841		0.527305	0.0517581
P15531	NME1	-0.190341	0.00511629	1.08361	0.297947	0.207856	0.58836	1.22145	-0.0846399	0.118885	1.29853	0.927518	0.589638	0.612128		0.459142	0.201475		0.577009	0.207565		0.513542	0.139648
P22392	NME2	0.750349	0.622505	0.324242	0.431988	0.687259	0.483737	0.435538	0.642687	0.310108	0.435767	0.525334	0.60603	0.584967		0.53366	0.058707		0.517482	0.0509295		0.526193	0.0378436
Q13232	NME3	0.0446313	0.0926531	0.132852	-0.0694	0.069817	0.0818464	0.109544	0.0484747	-0.00641585	0.0452664	-0.126766	0.0929361	-0.271904		0.065992	0.0249433		-0.0364015	0.0563111		0.0187334	0.0315347
Q13423	NNT	-0.0549703	-0.00228097	-0.0421879	-0.397257	-0.0738653	-0.100819	-0.0271007	0.0257386	-0.0411125	-0.288735	-0.146787	-0.429908	-0.255898		-0.099783	0.0510085		-0.18945	0.0688533		-0.141168	0.0421747
O60936	NOL3	-0.123882	0.549883	0.424497	0.198086	0.105184	0.270677	0.487222	0.0156202	0.0340164	0.855716	0.577614	0.33248	0.216554		0.273095	0.0895494		0.338667	0.133736		0.303359	0.0754155
Q5JPE7	NOMO2	-0.290176	-0.190088	-0.351736	-0.561305	-0.224841	-0.191653	-0.282457	-0.265685	-0.314693	-0.340505	-0.247699	-0.407352	-0.372417		-0.298894	0.048995		-0.324725	0.0250799		-0.310816	0.0279477
Q15233	NONO	-0.895387	-0.547997	0.0205545	-0.324884	-0.877374	-0.473944	-0.338416	-0.720233	-0.667296	-0.324731	-0.448885	-0.487493	-0.399048		-0.491064	0.122369		-0.507948	0.0631906		-0.498857	0.0693204
O00567	NOP56	0.0681023	0.00158799	-0.0836618	-0.333486	-0.0346239	-0.213981	-0.214287	0.138043	0.221798	-0.215398	-0.368491	-0.366669	-0.132235		-0.115764	0.0538846		-0.120492	0.102511		-0.117946	0.0529439
Q9Y2X3	NOP58	-0.288319	-0.177779	-0.0770842	0.0440025	-0.0200019	0.0716588	0.324247	-0.160208	-0.263788	0.180072	0.244874	0.310163	0.0967284		-0.0176107	0.0741799		0.0679736	0.09407		0.0218897	0.057749
P61916	NPC2	1.52386	0.738711	0.0313025	1.50636	0.624887	1.4055	0.337916	1.60845	0.686576	0.575211	0.49495	1.47634	1.50567		0.881219	0.227941		1.05787	0.213423		0.962748	0.152952
Q8NDH3	NPEPL1	0.442683	0.135925	0.0630133	0.725249	0.668855	0.464593	0.500532	0.409649	0.34084	0.673184	0.473506	0.803524	0.855716		0.428693	0.0940748		0.592736	0.0877972		0.504405	0.0665011
P55786	NPEPPS	0.58299	0.664747	0.754604	0.305761	0.889185	0.575235	0.577799	0.64644	0.636683	0.562028	0.527279	0.397962	0.440167		0.621474	0.0683942		0.535093	0.0413607		0.581606	0.0417482
Q8TAT6	NPLOC4	-0.0977973	-0.0710347	-0.115627	0.272533	-0.0162369	0.116403	0.101992	-0.0712228	-0.0472492	0.0311688	0.0738361	0.366365	0.132687		0.027176	0.053741		0.0809308	0.0648739		0.0519859	0.0405803
P06748	NPM1	-0.239851	0.0712221	0.184709	-0.0358628	0.101293	-0.0366241	0.337916	-0.0641047	-0.179481	0.11558	0.156131	0.0750588	0.117884		0.054686	0.0694981		0.0368447	0.0533679		0.0464515	0.0430661
Q9Y639	NPTN	-0.963445	-0.84815	-0.391388	-0.246387	-0.755528	-0.258585	-0.0751599	-0.931745	-0.926049	-0.00460542	-0.0565829	-0.3597	-0.25448		-0.50552	0.130563		-0.422194	0.168681		-0.467062	0.10102
P15559	NQO1	0.437411	0.284418	-0.0348877	0.472304	0.221027	0.680849	0.307651	1.74165	-0.172926	0.193229	0.409282	0.546262	0.596169		0.338396	0.0847945		0.552278	0.264061		0.437111	0.127642
P01111	NRAS	0.1004	0.117338	-0.00921145	-0.249808	0.183428	-0.0962556	-0.0691439	-0.0713598	0.0261328	-0.252663	-0.0813613	0.0272171	-0.00167943		-0.0033219	0.0564741		-0.0589524	0.0432531		-0.0289975	0.0358125
Q92823	NRCAM	-0.121079	-0.104238	0.137735	-0.161166	-0.207678	0.0505775	0.120856	-0.211283	-0.134948	0.366177	0.225065	-0.260231	-0.14131		-0.0407133	0.0532653		-0.0260884	0.105071		-0.0339633	0.0537712
O14786	NRP1	-0.355334	-0.764723	-0.991771	-0.209798	-0.679735	-0.46461	-0.815076	-0.456894	-0.688914	-0.942395	-0.680937	-0.407352	-0.426521		-0.611578	0.104965		-0.600502	0.0855135		-0.606466	0.0661447
O60462	NRP2	-0.380463	-0.385929	-0.663006	-0.395569	-0.211639	-0.0249238	-0.590572	-0.345647	-0.420345	-0.572123	-0.435526	-0.15659	-0.165836		-0.378872	0.0815222		-0.349344	0.0665687		-0.365244	0.0515705
P46459	NSF	0.125115	-0.00228097	0.823059	0.396423	0.010894	0.0955496	0.924228	0.0967366	0.10673	0.76372	0.593492	0.0550459	0.156255		0.338998	0.147135		0.29533	0.123879		0.318844	0.0939101
Q9UNZ2	NSFL1C	-0.0137252	-0.0336997	-0.104441	0.341545	0.0949593	0.436854	0.256255	0.147718	0.00485639	0.776453	0.2079	0.651668	0.399517		0.139678	0.0783521		0.364685	0.123053		0.243528	0.0749216
Q8TCD5	NT5C	0.362094	0.501518	0.664543	0.112902	0.768074	0.595627	0.418897	0.487752	0.360244	0.667771	0.243024	0.419741	0.179581		0.489094	0.0820414		0.393019	0.0717183		0.444751	0.0547031
P49902	NT5C2	0.0723472	0.0662003	-0.0465192	-0.526074	-0.420024	-0.153525	0.139045	-0.0713598	-0.0411125	-0.152636	-0.0959431	-0.260231	-0.384546		-0.124079	0.097601		-0.167638	0.053624		-0.144183	0.0561868
Q02818	NUCB1	0.368714	0.292314	0.390111	0.535187	0.223285	0.292003	0.211335	0.306466	0.18067	0.105566	0.0925224	0.422508	0.33224		0.330421	0.0424113		0.239995	0.0546436		0.288686	0.0350404
P80303	NUCB2	0.297045	0.204178	0.271107	-0.111559	0.299922	-0.0990832	0.0542294	0.206971	0.0137825	-0.0823506	-0.105333	-0.099369	-0.130115		0.130834	0.0687919		-0.0327356	0.0520506		0.0553405	0.0484685
Q9Y266	NUDC	-0.069351	0.000460123	0.121371	-0.155065	-0.0849361	-0.135127	0.182847	0.119266	0.00485639	0.250451	-0.0716094	0.0355924	-0.0746119		-0.0199716	0.0487218		0.0439908	0.0507688		0.0095495	0.0349213
Q9BRJ7	NUDT16L1	-0.103058	-0.155331	0.488396	-0.411451	-0.152165	0.165237	0.621536	-0.129768	-0.0760073	0.531426	0.39263	-0.282033	-0.231675		0.0647378	0.142261		0.0340955	0.139694		0.0505952	0.0960256
O43809	NUDT21	-0.232011	-0.238273	0.0293315	-0.477429	-0.207348	-0.334614	-0.0596316	-0.195081	-0.160957	-0.0643631	-0.168918	-0.578124	-0.327511		-0.217139	0.0632213		-0.249159	0.0743077		-0.231918	0.046467
O95989	NUDT3	0.0939386	0.0787944	0.388543	0.0345886	0.233194	-0.0495736	0.218654	0.160937	0.0666259	0.595585	0.206394	0.495727	0.208463		0.142591	0.0555311		0.288955	0.0848312		0.210144	0.0515539
Q9NZJ9	NUDT4	-0.187157	-0.131582	0.283465	-0.054638	-0.236368	-0.121827	0.186121	-0.21215	-0.226518	0.425076	-0.00751787	-0.315645	-0.233737		-0.0374265	0.0741984		-0.095082	0.112114		-0.0640367	0.0629943
Q9UKK9	NUDT5	-0.0758621	-0.142296	-0.200444	-0.172658	0.00929197	-0.143249	-0.0817606	-0.0788561	-0.191238	-0.0874305	-0.173853	-0.105099	-0.00729089		-0.115283	0.0268385		-0.107295	0.0274987		-0.111596	0.0184572
Q14980	NUMA1	-0.205213	-0.196248	-0.351504	0.00448194	-0.110171	-0.0399877	-0.344449	-0.173932	-0.224068	-0.271904	-0.321752	0.0493904	0.0027152		-0.177584	0.0525151		-0.156592	0.0614372		-0.167895	0.0384382
P57740	NUP107	-0.595977	-0.526481	-0.370759	-0.0917127	-0.354141	-0.330724	-0.289078	-0.500643	-0.557086	-0.227608	-0.260021	-0.118012	-0.222353		-0.365553	0.0619525		-0.314287	0.0709727		-0.341892	0.045348
Q8WUM0	NUP133	-0.213501	-0.0910504	-0.243174	-0.169059	-0.422742	-0.389416	-0.246117	-0.372021	-0.168022	-0.445077	-0.243845	-0.498783	-0.538045		-0.25358	0.0442926		-0.377632	0.0596728		-0.310835	0.0391366
O75694	NUP155	-0.490866	-0.282738	-0.429473	-0.882926	-0.417736	-0.861964	-0.477901	-0.33742	-0.330962	-0.483168	-0.41909	-0.976014	-0.664212		-0.549086	0.0873281		-0.535145	0.101321		-0.542652	0.0634938
Q12769	NUP160	-0.70852	-0.895726	-0.879204	-0.224933	-1.09897	-0.113468	-0.348374	-1.04188	-0.972834	-0.403362	-0.289014	-0.477616	-0.45236		-0.609885	0.143608		-0.606178	0.129896		-0.608174	0.093795
Q92621	NUP205	-0.642853	-0.387999	-0.448779	-0.505449	-0.524027	-0.658342	-0.511176	-0.538363	-0.557086	-0.478403	-0.582159	-0.564882	-0.609877		-0.525518	0.0367815		-0.555128	0.0182527		-0.539184	0.0211297
Q8N1F7	NUP93	-0.355334	-0.175672	-0.243174	-0.0223059	-0.261701	-0.231375	-0.373422	-0.249995	-0.308842	-0.237201	-0.344165	-0.160216	-0.384546		-0.237569	0.0444935		-0.280828	0.0331436		-0.257535	0.027982
P61970	NUTF2	0.596379	0.711874	0.866127	0.518002	0.709497	1.10804	1.12653	0.720053	0.737293	1.09131	1.23633	0.686643	0.709054		0.805207	0.0903215		0.863447	0.0970459		0.832087	0.0638573
P04181	OAT	-0.0878352	0.0190683	0.116925	-0.0329222	0.0233295	0.0642337	0.259207	-0.0324672	-0.088375	0.268905	0.383425	0.083025	0.102374		0.0517152	0.0425305		0.119481	0.0730086		0.0829918	0.0400893
Q9NX40	OCIAD1	0.65725	0.590577	0.344348	0.828439	0.786184	0.650071	0.448127	0.628284	0.505085	0.572274	0.402058	1.1899	0.581316		0.615	0.0653872		0.646487	0.113303		0.629532	0.0603357
Q5SWX8	ODR4	-0.0406177	-0.068913	-0.260512	0.0777797	-0.0890441	0.00867731	-0.337168	-0.111176	-0.0874298	-0.202138	-0.339697	-0.0272654	-0.0436899		-0.1014	0.0556408		-0.135233	0.0480218		-0.117015	0.0360652
Q02218	OGDH	-0.213501	-0.282738	-0.37733	0.0102015	-0.195962	0.0159997	0.159124	-0.273238	-0.321465	-0.10573	0.146008	0.187699	0.0201452		-0.126315	0.072423		-0.0577636	0.0868165		-0.0946759	0.0543958
Q9ULD0	OGDHL	0.473082	0.384206	0.51565	0.841276	0.28464	0.485253	0.575487	0.473786	0.402032	0.305408	0.547385	0.463405	0.367692		0.508514	0.0659428		0.426618	0.0350862		0.470716	0.039324
P20774	OGN	-1.63691	-1.39003	-1.83004	-2.05655	-1.58093	-1.73921	-1.6526	-1.55028	-1.94961	-1.71683	-1.63358	-1.00283	-1.82723		-1.69804	0.0789877		-1.61339	0.134987		-1.65897	0.0730224
Q9NTK5	OLA1	0.0435028	0.222589	0.363045	0.141812	0.166992	0.219659	0.345098	0.128037	0.17705	0.386764	0.201856	0.293028	0.26616		0.214671	0.0425368		0.242149	0.0378425		0.227353	0.0278958
Q99784	OLFM1	0.00533669	0.00616701	0.00616231	-0.662775	0.00616544	-0.661985	-0.839427	0.00618448	0.00616982	-0.780524	-0.700017	-0.941546	-0.894131		-0.305765	0.148631		-0.550644	0.179448		-0.418786	0.115681
Q6UWY5	OLFML1	-0.720646	-1.02033	-1.14887	-0.877422	-0.747789	-0.959104	-1.42133	-0.747507	-0.893748	-1.07949	-1.25751	-1.17985	-1.1032		-0.985069	0.0921801		-1.04355	0.0773063		-1.01206	0.0592268
Q9NRN5	OLFML3	-0.693376	-0.932067	-1.03023	-1.20693	-0.589679	-0.904848	-1.62157	-0.652759	-0.856395	-1.46852	-1.2853	-1.27941	-1.21903		-0.996957	0.129658		-1.1269	0.12537		-1.05693	0.0888728
O60313	OPA1	-0.213501	-0.435859	-0.301346	-0.126692	-0.0779808	-0.0982431	-0.0150065	-0.227596	-0.209424	-0.104078	-0.124863	-0.0409152	-0.0848399		-0.181233	0.0553037		-0.131953	0.0297121		-0.158488	0.0323034
Q9H6K4	OPA3	-0.161876	-0.26636	-0.363297	-0.74124	-0.119986	-0.731036	-0.563452	-0.163504	-0.192823	-0.569523	-0.7348	-0.818837	-0.741265		-0.421035	0.0980726		-0.536792	0.118222		-0.474461	0.0745307
P0DN77	OPN1MW2	0.646325	0.145463	1.0692	0.800477	0.441506	0.352398	0.894623	0.62808	0.548703	0.846994	0.842523	0.0374467	0.536134		0.621427	0.123356		0.573313	0.121039		0.599221	0.0834396
Q9UBM4	OPTC	0.147483	0.0156103	-0.235201	0.506511	0.11087	0.245202	-0.571558	0.113507	1.31985	-0.41187	0.588332	0.248875	0.279068		0.0312739	0.131486		0.356293	0.234435		0.181283	0.131953
P02763	ORM1	2.05239	1.91406	0.89347	2.04186	1.15485	1.75526	0.937465	1.36425	1.85663	0.71356	1.60645	1.94104	1.80852		1.53562	0.196996		1.54841	0.187179		1.54152	0.131108
P19652	ORM2	1.70925	1.56669	0.629093	2.25102	1.09531	1.80821	1.17705	1.21195	1.63268	0.758924	1.83158	1.08524	1.98748		1.46237	0.202596		1.41798	0.193994		1.44188	0.135384
P22059	OSBP	0.305575	0.350764	0.206826	0.470801	0.30652	0.474583	0.350558	1.06765	0.272281	0.317887	0.324657	0.635043	0.336872		0.352232	0.0360035		0.492399	0.12682		0.416925	0.0620388
Q9BZF1	OSBPL8	0.105829	0.121986	-0.231028	0.226416	-0.00562002	0.237452	-0.261664	0.164432	0.0295484	-0.154406	-0.0521997	0.327177	0.295065		0.0276245	0.0771918		0.101603	0.0788768		0.0617683	0.0539817
Q96SU4	OSBPL9	0.160991	0.0191382	-0.19163	-0.038822	0.036061	-0.206602	-0.264668	0.118679	0.0792826	-0.310489	-0.167141	0.0550459	-0.132235		-0.0693616	0.0587306		-0.0594763	0.0692824		-0.0647991	0.0430553
Q96FW1	OTUB1	-0.330094	-0.108636	-0.0222952	-0.0223059	-0.293192	-0.137489	0.0487017	-0.247613	-0.170316	0.130818	-0.161746	-0.0904181	-0.202361		-0.123616	0.0539023		-0.123606	0.0550907		-0.123611	0.0369579
P32243	OTX2	-0.235353	-0.805847	0.342152	-0.312465	-0.379031	-0.457005	0.41005	-0.548487	-0.514014	0.347195	0.116116	-0.535169	-0.231675		-0.205357	0.165108		-0.227672	0.155793		-0.215656	0.109623
P55809	OXCT1	0.618705	0.374308	0.380631	0.385045	0.491594	0.392053	0.854964	0.430319	0.349876	0.589404	0.702868	0.393631	0.454678		0.499614	0.0681515		0.486796	0.0544253		0.493698	0.0427027
Q8N573	OXR1	-0.364608	-0.326472	-0.142969	-0.650908	-0.219857	-0.182473	-0.153002	-0.303367	-0.287851	0.150563	-0.267965	-0.621669	-0.49976		-0.29147	0.0679643		-0.305008	0.107613		-0.297718	0.0589444
O95747	OXSR1	0.57607	1.04809	0.200967	0.280078	0.63574	0.334155	-0.132226	0.650452	1.24815	0.10696	-0.0439965	0.390697	0.401947		0.42041	0.141864		0.459035	0.186572		0.438237	0.110197
P07237	P4HB	0.129727	0.171451	-0.0654918	-0.0570379	0.137515	0.242075	0.243313	0.354238	-0.0721527	-0.0575053	0.195385	0.167819	0.13027		0.114507	0.0484757		0.119676	0.0661747		0.116893	0.0384103
Q9UQ80	PA2G4	0.622304	0.456891	0.422558	0.416405	0.627338	0.492624	0.444222	0.535594	0.487356	0.575211	0.350294	0.527411	0.553672		0.497477	0.0342046		0.504923	0.0331573		0.500914	0.0229687
P11940	PABPC1	-0.181906	-0.410025	-0.368732	-0.404447	-0.417736	-0.354087	-0.248003	-0.355538	-0.469657	-0.433396	-0.429613	-0.650912	-0.41187		-0.340705	0.0343572		-0.458498	0.0413872		-0.395071	0.0305706
Q13310	PABPC4	-0.251622	-0.267765	-0.196198	-0.568244	-0.19137	-0.687808	-0.353722	-0.220157	-0.290834	-0.438863	-0.622533	-0.582671	-0.375126		-0.359533	0.073417		-0.421697	0.0649244		-0.388224	0.0483923
Q86U42	PABPN1	-0.1461	-0.0217744	0.183066	-0.154697	-0.162805	-0.217536	0.210325	-0.301479	-0.238524	0.0338152	0.0462576	-0.215252	-0.217503		-0.0442173	0.0661243		-0.148781	0.0610718		-0.0924774	0.0460531
Q6VY07	PACS1	-0.174819	-0.136703	0.337005	-0.186804	-0.228735	-0.0313709	0.274482	-0.186495	-0.1589	0.233428	0.0859238	-0.123805	-0.304879		-0.0209922	0.087733		-0.0757879	0.0807707		-0.0462825	0.0582157
Q9BY11	PACSIN1	0.0589802	-0.792287	0.455271	0.136654	0.186849	-0.0417641	0.804679	-0.105464	-0.44788	0.791085	0.423477	0.0685611	-0.0578516		0.115483	0.185675		0.111988	0.17792		0.11387	0.123974
Q9Y2J8	PADI2	-0.0274105	-0.282738	0.639242	-0.00932465	0.0460847	-0.137489	0.662934	-0.204769	0.238057	0.650873	0.277196	0.0841617	-0.184229		0.127329	0.141121		0.143548	0.131207		0.134815	0.0931549
P43034	PAFAH1B1	0.141297	0.345995	0.392356	0.0068473	0.297307	0.194835	0.417204	0.28205	0.221981	0.355882	0.466282	0.305253	0.407368		0.256549	0.0563489		0.339803	0.0361625		0.294974	0.0353538
P68402	PAFAH1B2	0.600803	0.490133	0.554118	0.542251	0.575146	0.701016	0.546349	0.43469	0.390134	0.663116	0.673468	0.794556	0.835718		0.572831	0.024902		0.631947	0.0748429		0.600115	0.036284
Q15102	PAFAH1B3	0.253585	0.280405	0.617259	0.219961	0.254502	0.474583	0.37185	0.258221	0.244786	0.343452	0.215182	0.266021	0.0386811		0.353164	0.0551027		0.227724	0.0416235		0.295268	0.0384255
P22234	PAICS	0.17446	0.355007	0.219438	0.223338	0.217891	0.421549	0.199014	0.263976	0.192499	0.474252	0.295005	0.476986	0.34532		0.258671	0.0348161		0.34134	0.0470344		0.296826	0.0298884
Q9H074	PAIP1	-0.214588	-0.267549	-0.0500355	0.138843	-0.213778	-0.542004	-0.255525	-0.245593	-0.176653	-0.0763557	-0.496814	-0.10209	0.0274827		-0.200662	0.0790292		-0.178337	0.0740562		-0.190358	0.0524072
Q9ULE6	PALD1	0.202777	0.195296	-0.0044145	0.330285	0.113963	0.644499	0.106677	0.126251	0.178151	-0.0194947	0.0691809	0.310163	0.154681		0.227012	0.0797873		0.136489	0.0451647		0.185232	0.0477065
O75781	PALM	-0.126447	-0.0910504	-0.160995	-0.294493	-0.12256	-0.166997	-0.0728413	-0.456894	-0.193418	-0.353655	0.0437235	-0.437764	-0.186026		-0.147912	0.0275999		-0.264006	0.0777165		-0.201494	0.0405675
O95340	PAPSS2	0.00533669	0.00616701	0.00616231	-0.829289	0.00616544	-0.118709	-0.876118	0.00618448	0.00616982	-0.894858	-0.860181	-0.93241	-1.04748		-0.257184	0.154807		-0.620429	0.199814		-0.424835	0.129857
Q99497	PARK7	0.956399	1.10204	1.50641	0.636474	1.04305	0.994443	1.74185	1.03261	1.06222	1.37869	1.5177	1.1415	1.03199		1.14009	0.139365		1.19412	0.0839264		1.16503	0.0815119
P09874	PARP1	1.11124	0.355687	0.663014	0.176164	0.803045	0.265437	0.675411	0.620963	0.596306	0.392493	0.440761	0.102662	0.0927484		0.578571	0.125385		0.374322	0.0945051		0.484303	0.0825481
Q9NVD7	PARVA	-0.164753	0.00648046	-0.266441	-0.324884	-0.0098649	-0.191653	-0.456559	-4.23846e-05	-0.143342	-0.542416	0.0998735	-0.204234	-0.219947		-0.201096	0.0628532		-0.168351	0.0903276		-0.185983	0.0515254
Q96AQ6	PBXIP1	0.0537624	-0.0813803	0.450019	1.01872	0.295902	0.495237	0.442748	0.169946	0.0922568	0.348532	0.344172	0.778006	0.5631		0.382145	0.134202		0.382669	0.103454		0.382387	0.0831093
P11498	PC	0.79226	0.89904	0.281151	0.460029	0.854947	0.639577	-0.00383119	0.694154	0.625049	-0.0948832	0.101721	0.63115	0.545694		0.560453	0.126102		0.417148	0.134653		0.494312	0.0905174
P61457	PCBD1	0.561952	0.577371	0.915862	0.490236	0.844782	0.62462	0.769969	0.519185	0.360244	0.848684	0.708479	0.737482	0.667299		0.683542	0.060619		0.640229	0.0710271		0.663551	0.0447029
Q15365	PCBP1	0.122877	0.295664	0.190387	-0.425939	-0.0281517	-0.354087	-0.12474	0.253343	0.376657	-0.204318	-0.256965	-0.420522	-0.327511		-0.0462843	0.103155		-0.0965529	0.134412		-0.0694852	0.0799472
Q15366	PCBP2	-0.670634	-0.131278	0.35304	-0.568244	-1.04102	-0.568077	0.132148	-0.212452	-0.129072	-0.0540347	-0.119135	-0.788165	-0.423457		-0.356295	0.185793		-0.287719	0.11295		-0.324645	0.108832
P57721	PCBP3	-0.35359	-0.347162	0.0708342	-0.529402	-0.482394	-0.75684	0.345098	-0.338185	-0.24796	0.0614676	-0.274589	-0.82895	-0.523832		-0.293351	0.142516		-0.358675	0.121752		-0.3235	0.0916915
P05165	PCCA	-0.365051	-0.0176364	-0.561917	-0.17052	-0.34737	0.0798441	-0.387925	-0.0900129	0.0516165	-0.45236	-0.43116	-0.265759	-0.29398		-0.252939	0.085646		-0.246942	0.0800964		-0.250172	0.0566512
P05166	PCCB	-0.11154	-0.204673	0.450019	0.51567	-0.27457	0.405	0.223388	-0.0399313	-0.242351	0.206645	0.269314	0.274411	0.35749		0.143328	0.126141		0.137596	0.0939973		0.140683	0.0773541
P22061	PCMT1	0.111241	0.183261	0.610733	-0.226936	0.0847091	0.170881	0.668208	0.11249	0.193948	0.589404	0.45757	-0.0741033	0.16678		0.228871	0.118186		0.241015	0.0986264		0.234476	0.0750619
P12004	PCNA	-0.0212861	0.00152102	0.113954	0.138843	0.0897913	0.0192993	0.248479	0.0145865	0.059937	0.346147	0.078529	0.173863	0.0184781		0.0843717	0.0355451		0.115257	0.0518507		0.0986263	0.0296131
P48539	PCP4	-0.00107482	-0.331302	0.444795	-0.0964359	-0.0161182	-0.173322	0.211379	-0.108711	-0.135214	0.0939395	0.0181737	-0.157619	-0.199949		0.00541723	0.0965698		-0.0815634	0.0462471		-0.0347277	0.0554866
Q9UHG3	PCYOX1	-0.423771	-0.342146	-0.475942	-0.462832	-0.400663	-0.404616	-0.236765	-0.325208	-0.429788	-0.403362	-0.269943	-0.498783	-0.515475		-0.392391	0.030818		-0.407093	0.039242		-0.399176	0.0235864
Q8NBM8	PCYOX1L	-0.0115661	-0.115553	0.755766	0.336797	-0.0947376	0.173634	0.901562	-0.0737706	0.0868837	0.787929	0.771359	-0.140432	0.495604		0.277986	0.155004		0.321262	0.170773		0.29796	0.110072
P20941	PDC	0.262865	-0.125624	1.32206	0.453019	0.179821	0.0965629	1.29754	0.194428	0.335495	0.961286	0.885828	0.166389	0.320805		0.498034	0.219683		0.477372	0.144039		0.488498	0.130353
Q53EL6	PDCD4	0.325336	0.294238	-0.0119303	0.0777797	0.391914	0.31302	0.139045	0.324918	0.307716	0.0652148	0.16687	0.370086	0.194062		0.218486	0.0567723		0.238144	0.0471545		0.227559	0.0361021
O14737	PDCD5	-0.311255	-0.307131	-0.200769	-0.745096	-0.323663	-0.583023	-0.145946	-0.261631	-0.356185	-0.21672	-0.393062	-0.556884	-0.691855		-0.373841	0.0808235		-0.412723	0.07383		-0.391786	0.0532756
O75340	PDCD6	-0.70852	-0.812018	-0.651548	-0.753036	-1.19989	-0.684566	-0.338416	-0.96589	-0.712948	-0.223606	-0.382214	-0.857462	-0.764049		-0.735428	0.0963458		-0.651028	0.117376		-0.696474	0.0727742
Q8WUM4	PDCD6IP	0.0400167	0.0662003	0.151438	-0.218635	0.20171	-0.184202	-0.0535654	0.0525698	0.0761868	-0.0451232	-0.067025	-0.0741033	-0.215398		0.000423179	0.060593		-0.0454822	0.0426507		-0.0207639	0.0371746
Q6L8Q7	PDE12	0.485633	-0.00831291	0.0691354	0.88622	0.315417	0.401775	0.477735	0.311361	0.298655	0.504244	0.382522	0.564774	0.579171		0.375372	0.112217		0.440121	0.0512817		0.405256	0.0631099
Q14123	PDE1C	-0.101461	-0.0708105	-0.313166	0.312339	-0.0177891	0.364495	-0.400646	-0.192551	-0.0689077	-0.57792	-0.0935834	0.399386	0.105566		-0.032434	0.10881		-0.071335	0.132249		-0.0503883	0.0811317
O76074	PDE5A	0.153903	0.192159	-0.0547022	0.0913653	0.187154	1.10287	0.122489	0.253181	0.156758	0.0164521	0.0287143	0.638712	-0.127487		0.256462	0.144575		0.161055	0.109292		0.212428	0.0900725
P16499	PDE6A	0.0354906	0.241769	1.48499	0.453019	0.662761	0.190651	1.15317	0.0904752	0.297242	1.17787	0.759368	0.179742	0.454678		0.603122	0.20291		0.49323	0.167327		0.552402	0.129303
P35913	PDE6B	0.409328	0.399452	0.699462	0.645639	0.372588	0.387971	0.840085	0.316684	0.521744	0.904823	0.580763	0.392349	0.530847		0.536361	0.0714667		0.541202	0.0830334		0.538595	0.0519755
O43924	PDE6D	1.14848	0.979329	0.443019	1.03976	0.918724	2.37588	1.00802	1.06833	0.938413	0.362917	0.731813	0.840804	0.54892		1.13046	0.224397		0.748533	0.105777		0.954185	0.136856
P09619	PDGFRB	-0.202395	0.0628374	-0.581344	-0.896546	-0.243946	-0.78453	-1.01783	-0.0278197	0.0124369	-0.949254	-0.996249	-0.750504	-0.69756		-0.523393	0.152757		-0.568158	0.183262		-0.544054	0.11306
P08559	PDHA1	-0.393861	-0.533247	-0.308675	-0.621691	-0.368427	-0.579895	-0.273975	-0.491781	-0.531139	-0.427251	-0.451814	-0.50397	-0.495403		-0.439967	0.0519476		-0.48356	0.0153478		-0.460087	0.0284813
P11177	PDHB	0.213232	0.0314276	0.128647	-0.462832	0.174949	-0.853073	-0.0777577	0.0846671	0.17705	-0.443801	-0.370147	-0.516832	-0.574012		-0.120772	0.149563		-0.273846	0.131547		-0.191422	0.0991743
P30101	PDIA3	0.449141	0.466121	0.172425	0.197023	0.333044	0.322487	0.361778	0.522786	0.306808	0.137996	0.330689	0.472606	0.338715		0.32886	0.0426231		0.3516	0.0554327		0.339355	0.0330265
P13667	PDIA4	0.536688	0.641634	0.130028	-0.17052	0.242746	0.138114	0.0755065	0.558372	0.672693	-0.188076	0.03995	-0.11998	-0.0895626		0.227742	0.105373		0.145566	0.152375		0.189815	0.0871452
Q15084	PDIA6	0.538253	0.447518	0.254861	0.326041	0.282634	0.609992	0.442748	0.485283	0.223516	0.321513	0.40612	0.307478	0.452942		0.414578	0.0502655		0.366142	0.0404567		0.392223	0.0323046
Q96HC4	PDLIM5	-0.622593	-0.342146	-0.752028	0.168572	-0.836151	-0.209935	-0.447838	-0.609771	-0.319014	-0.456302	-0.408213	0.182942	-0.074016		-0.434588	0.130963		-0.280729	0.117549		-0.363576	0.0881204
Q9NR12	PDLIM7	0.00533669	0.00616701	0.00616231	-1.046	0.00616544	-0.914351	-0.752208	0.00618448	0.00616982	-0.686593	-0.841214	-0.479956	-0.764049		-0.384104	0.18666		-0.45991	0.155366		-0.419091	0.118918
Q9P0J1	PDP1	-0.309359	-0.31858	-0.432027	-0.650908	-0.447619	-0.226851	-0.424817	-0.412179	-0.406972	-0.0948832	-0.109337	-0.471852	-0.519578		-0.401452	0.0515647		-0.3358	0.0758309		-0.371151	0.0437145
Q9NTI5	PDS5B	-0.9005	-0.925471	-0.65123	-1.05436	-0.855228	-1.05092	-0.629047	-0.859612	-0.930426	-0.764049	-0.907998	-0.98167	-1.01337		-0.866681	0.0648791		-0.909521	0.0365525		-0.886453	0.0377918
Q6P996	PDXDC1	-0.0332506	-0.0219334	-0.0560786	0.360859	0.105679	0.00994709	-0.10027	0.0775514	-0.0687992	-0.259766	-0.0308819	0.397962	0.0363796		0.0378504	0.0590084		0.0254075	0.0885068		0.0321075	0.0494682
O00764	PDXK	0.510608	0.649161	0.6121	-0.103204	0.610025	-0.0840243	0.460645	0.511527	0.449282	0.601496	0.436326	0.0341188	-0.113271		0.37933	0.124556		0.319913	0.117703		0.351907	0.0831518
Q15121	PEA15	-0.101369	-0.0288014	0.97885	0.158295	0.28604	0.0282639	0.715841	-0.204769	0.20621	0.786594	0.559963	0.467155	0.191719		0.291017	0.154035		0.334479	0.141477		0.311076	0.101372
P30086	PEBP1	1.34063	1.32078	1.28255	1.00183	1.36976	1.27965	1.12653	1.09674	0.951919	1.11371	1.20009	1.2359	1.15926		1.24596	0.0502915		1.12627	0.040818		1.19072	0.0360285
P16284	PECAM1	-1.84851	-1.76557	-1.55276	0.25295	-1.63691	-0.434873	-0.979284	-1.57923	-1.81121	-0.724857	-0.96433	-0.354558	-0.338268		-1.13785	0.299759		-0.962076	0.252745		-1.05672	0.192656
Q8IZL8	PELP1	0.145921	0.417262	-0.108355	0.296953	0.344137	0.810724	-0.188762	0.283975	0.290262	0.198853	0.572773	0.117597	0.191719		0.245411	0.127715		0.275863	0.0649326		0.259466	0.0722599
P12955	PEPD	0.877229	0.879753	0.432917	0.554843	1.08674	0.505212	0.0143082	0.843438	0.776548	0.291474	-0.025391	0.872877	0.811065		0.621572	0.135467		0.595002	0.152271		0.609309	0.0970273
O75381	PEX14	0.0455998	-0.078106	0.786053	0.0102015	0.0770177	-0.124886	0.712869	3.25802e-05	0.0952553	0.864478	0.668695	-0.0149909	0.0294568		0.204107	0.143449		0.273821	0.158616		0.236283	0.102367
P40855	PEX19	0.670256	0.614098	0.578315	0.903307	0.698333	0.579756	0.539412	0.592129	0.610114	0.689196	0.846601	0.698003	0.43617		0.654783	0.046379		0.645369	0.0556857		0.650438	0.0343115
O15067	PFAS	0.00533669	0.00616701	0.00616231	-0.17485	0.00616544	-0.764378	-0.680336	0.00618448	0.00616982	-0.764049	-0.752685	-0.860682	-0.609877		-0.227962	0.130391		-0.495823	0.162076		-0.35159	0.105428
Q9UHV9	PFDN2	-0.0738653	-0.2875	-0.0362391	0.0716912	-0.0441747	-0.00536225	0.0347277	-0.154321	-0.227659	0.0909937	-0.239731	0.198372	-0.0102112		-0.0486746	0.0439607		-0.0570929	0.0733241		-0.05256	0.0394423
Q99471	PFDN5	1.15251	1.27754	0.444377	1.38823	0.924151	1.17224	0.519261	1.17858	1.11214	0.604312	0.567926	1.27027	1.27413		0.982616	0.14008		1.00123	0.133655		0.991205	0.09341
O15212	PFDN6	-0.0341736	-0.0307305	0.139216	0.0401864	0.117659	-0.0217493	0.298578	0.00836167	0.00532517	0.374697	0.137251	0.270562	0.0221387		0.0727123	0.0461788		0.136389	0.0636176		0.102102	0.0379
O60825	PFKFB2	0.376557	0.455352	0.544189	0.308214	0.403102	0.280861	0.641931	0.376152	0.398128	0.546788	0.482218	0.525635	0.612128		0.430029	0.0486119		0.490175	0.0369108		0.457789	0.0311952
P17858	PFKL	-0.0137252	0.0314276	0.260948	-0.135266	0.0668718	-0.104245	0.335563	-0.0366824	0.000791075	0.419029	0.43258	-0.0409152	0.0294568		0.063082	0.0668425		0.134043	0.0928787		0.0958334	0.0544621
P08237	PFKM	0.128715	0.0941976	0.677799	0.0138266	0.0967432	-0.0437751	0.551127	0.0299583	0.213417	0.687245	0.369544	0.0750588	0.0652148		0.216948	0.105852		0.240073	0.103181		0.227621	0.0712396
Q01813	PFKP	0.104347	0.027344	0.85235	-0.0183533	-0.0947404	-0.160556	0.525567	-0.0622043	0.141115	0.56939	0.462443	-0.169775	-0.209352		0.176565	0.14068		0.121936	0.134819		0.151352	0.0942631
P07737	PFN1	0.498905	0.54606	0.365497	0.677215	0.687259	0.750439	0.592033	0.624899	0.622212	0.519159	0.810726	0.839175	0.604816		0.588201	0.049622		0.670164	0.051557		0.62603	0.0362387
P35080	PFN2	-0.133801	-0.116254	0.440438	-0.0570379	-0.140142	-0.402627	-0.244053	-0.0939423	-0.0773455	-0.332204	-0.291912	-0.279728	-0.276251		-0.0933539	0.0986773		-0.22523	0.044933		-0.15422	0.0580517
P18669	PGAM1	0.642013	0.872014	1.09844	0.40019	0.522005	0.464593	1.09897	0.580875	0.735278	1.04456	1.10394	0.555203	0.493835		0.728318	0.111511		0.752282	0.107144		0.739378	0.0746147
P52209	PGD	0.695274	0.656579	0.722253	0.678201	0.861522	1.05702	1.00374	0.917886	0.602053	1.11906	0.905115	1.04963	0.885351		0.810656	0.062293		0.913183	0.0727251		0.857976	0.0477445
P00558	PGK1	0.78066	0.926137	1.44703	0.665968	0.697068	0.837449	1.48958	0.827514	0.925175	1.3714	1.43834	0.854824	0.73242		0.977699	0.130874		1.02494	0.123067		0.999505	0.0870072
O95336	PGLS	0.556124	0.54606	0.477918	0.568613	0.437411	0.921576	0.991932	0.580875	0.459788	0.701492	1.14822	0.7214	0.502433		0.642805	0.0832888		0.685702	0.101827		0.662603	0.062448
Q96PD5	PGLYRP2	0.724003	1.0778	0.2846	0.854384	0.562714	0.872197	0.27175	0.895087	1.02401	-0.111993	0.470908	0.480222	0.449599		0.66392	0.115726		0.534639	0.163482		0.604252	0.0953493
P36871	PGM1	0.534297	0.612588	0.82649	0.596857	0.761858	0.620574	0.826931	0.576593	0.522545	1.02044	0.625179	0.716001	0.535266		0.682799	0.0452274		0.666005	0.0764769		0.675048	0.0410038
Q96G03	PGM2	0.728136	0.910955	1.37454	0.585489	0.570923	0.58744	1.08239	0.653999	0.890479	1.20733	0.84104	0.569543	0.500169		0.834267	0.115755		0.777093	0.105982		0.807879	0.0763886
Q6PCE3	PGM2L1	0.286494	0.86461	0.817773	0.580181	0.828988	0.739502	0.784909	0.658224	0.768002	0.824079	0.701581	0.71469	0.678962		0.700351	0.0774163		0.724256	0.025097		0.711384	0.0417916
O95394	PGM3	0.648845	0.675614	0.693121	0.707309	0.607624	1.06726	0.549524	0.565246	0.598151	1.05406	1.37173	0.791321	0.391896		0.707042	0.0634373		0.795401	0.147623		0.747823	0.0737294
Q15124	PGM5	0.144481	0.157161	0.115051	0.396423	0.0856343	0.486515	0.027017	0.190758	0.171357	0.176723	0.353261	0.266021	0.170685		0.201755	0.0646949		0.221467	0.0302156		0.210853	0.0362004
A6NDG6	PGP	0.554583	0.665759	0.716889	0.658321	0.587292	0.754091	0.967006	0.646771	0.540248	0.782305	0.946726	0.49407	0.661733		0.700563	0.0514688		0.678642	0.0676108		0.690446	0.0400279
O00264	PGRMC1	-0.243906	-0.194578	-0.284007	-0.786186	-0.287392	-0.305548	-0.0419711	-0.256852	-0.218573	-0.206177	-0.183961	-0.263508	-0.540658		-0.306227	0.0869305		-0.278288	0.0539072		-0.293332	0.0510839
O15173	PGRMC2	-0.408103	-0.296871	-0.126406	-0.686653	-0.300582	-0.334614	0.0395344	-0.281213	-0.265052	-0.144928	-0.226317	-0.471852	-0.445077		-0.301956	0.0856052		-0.30574	0.0521004		-0.303703	0.049953
P35232	PHB	-0.52604	-0.475419	-0.169256	-0.50354	-0.575359	-0.290231	-0.0419711	-0.548487	-0.675638	-0.353655	-0.10085	-0.582671	-0.441388		-0.368831	0.0771087		-0.450448	0.0835614		-0.4065	0.0555115
Q99623	PHB2	-0.693376	-0.867714	-0.678288	-0.579523	-0.780906	-0.666859	-0.577622	-0.85145	-0.899601	-0.731544	-0.700017	-0.724494	-0.755589		-0.692041	0.039441		-0.777116	0.0325483		-0.731306	0.0277927
O43175	PHGDH	0.181689	0.339715	0.0137242	0.0703911	0.379857	0.262519	0.182847	0.222717	0.285719	0.0216627	0.319256	0.333957	0.374697		0.204392	0.050655		0.259668	0.0519589		0.229904	0.0356831
Q93100	PHKB	0.340307	0.237113	0.0785213	0.158295	0.432661	0.0400434	-0.184134	0.424158	0.216092	0.00139404	-0.0574188	0.261735	0.213098		0.157544	0.0774933		0.17651	0.0723157		0.166297	0.0512827
Q5SRE7	PHYHD1	0.71851	0.70915	0.697856	0.743082	0.732784	0.804321	0.820481	0.757291	0.643699	0.894205	0.531469	0.63115	0.598169		0.746598	0.0179689		0.675997	0.0529854		0.714013	0.0270195
Q96FC7	PHYHIPL	0.185268	0.155902	0.65647	0.371177	0.22564	0.145086	0.885754	0.19066	0.270673	0.823425	0.567059	0.298151	0.421673		0.375042	0.10903		0.428607	0.0955124		0.399764	0.0708117
Q6UXB8	PI16	0.38755	0.695999	-0.503224	0.143583	0.0370144	0.184639	-0.494481	-0.0366824	0.0160901	-0.526675	-0.507758	0.422508	-0.0895626		0.0644401	0.166144		-0.120347	0.145653		-0.020846	0.110539
Q9BTU6	PI4K2A	0.179504	0.206019	-0.487884	-0.260096	0.117654	0.173634	-0.325333	0.529094	-0.025841	-0.316663	-0.122467	-0.0181776	0.170685		-0.0566433	0.109948		0.0361049	0.117972		-0.0138364	0.0781614
P42356	PI4KA	-0.159297	-0.303717	-0.119359	-0.079295	-0.145778	0.0192993	-0.242352	0.0662381	-0.356662	-0.0990541	-0.0167793	-0.186825	0.025572		-0.147214	0.0398832		-0.094585	0.0641789		-0.122924	0.0357453
Q13492	PICALM	-0.343405	-0.215441	-0.403207	-0.417317	-0.210782	-0.498702	-0.518989	-0.32002	-0.31314	-0.485873	-0.500965	-0.364271	-0.561472		-0.372549	0.0468036		-0.42429	0.0429416		-0.39643	0.03162
Q92643	PIGK	-0.368359	-0.425975	-0.468094	-0.235224	-0.480465	-0.322779	-0.422778	-0.403289	-0.41513	-0.538289	-0.454541	-0.542577	-0.177916		-0.389096	0.0329459		-0.421957	0.0544963		-0.404263	0.029761
Q8TEQ8	PIGO	0.195069	0.283141	0.184733	-0.123413	0.311205	0.269554	0.148684	0.241061	0.166877	0.32447	0.234232	0.0778426	0.551571		0.181282	0.0554528		0.266009	0.0662896		0.220387	0.0426804
Q8NEB9	PIK3C3	0.653405	0.362417	-0.0229134	1.1732	0.320884	0.686692	-0.453024	0.451766	0.488253	-0.108563	-0.183961	0.404156	0.250891		0.388665	0.198657		0.21709	0.119949		0.309477	0.118328
Q99570	PIK3R4	-0.224118	-0.23853	-0.369631	-0.51269	-0.310737	-0.301766	-0.32272	-0.25975	-0.350216	-0.371296	-0.231374	-0.481722	-0.491499		-0.325742	0.0363903		-0.36431	0.0442774		-0.343542	0.0276469
Q13526	PIN1	0.4139	0.324637	0.330398	0.293793	0.336568	0.392454	0.213318	0.306466	0.325725	0.2675	0.315253	0.336536	0.288129		0.329295	0.024849		0.306602	0.0103389		0.318821	0.0140522
P78356	PIP4K2B	-0.094687	-0.0101097	0.0355231	0.189046	0.0942675	0.181974	0.202391	0.0134879	-0.0133415	0.293915	0.0738361	0.157856	0.0967284		0.0854864	0.0430602		0.103747	0.0454209		0.0939143	0.0300475
Q8TBX8	PIP4K2C	0.347038	0.181501	0.197913	0.109675	0.223285	0.152367	-0.201017	0.327558	0.228726	-0.269267	-0.00167744	0.284635	0.203062		0.144394	0.064014		0.128839	0.0921541		0.137215	0.0523585
Q8N4L2	PIP4P2	0.0467066	0.293129	-0.0813377	0.106784	0.234268	0.833024	-0.105077	0.235141	0.120001	0.3154	0.29101	0.312174	0.568737		0.189642	0.120932		0.307077	0.0602748		0.243843	0.0701543
Q00169	PITPNA	0.514251	0.553113	0.428018	0.835551	1.07411	0.768392	0.741103	0.772994	0.620409	0.966298	1.16695	1.03738	1.18372		0.702076	0.0837683		0.957958	0.0911363		0.820176	0.0695881
O00562	PITPNM1	-0.0408635	-0.160368	0.413108	-0.193344	-0.165519	0.109756	0.520517	-0.143973	-0.0419706	0.716412	0.237237	-0.210188	-0.318899		0.069041	0.110458		0.0397698	0.155821		0.0555312	0.0892854
P14618	PKM	0.421378	0.453307	1.46801	0.348775	0.57865	0.26349	1.32592	0.268779	0.668331	1.22215	1.06304	0.472606	0.399517		0.69422	0.18571		0.682404	0.156155		0.688766	0.118226
Q16512	PKN1	-0.434966	-0.140662	-0.448943	-0.0978308	-0.496775	-0.0902928	-0.369365	-0.14316	-0.318811	-0.368705	-0.483236	-0.305632	-0.246528		-0.296976	0.0679821		-0.311012	0.0466946		-0.303454	0.0408369
Q99569	PKP4	-0.030106	0.0809714	-0.0276773	-0.141298	0.0753798	-0.25862	-0.306966	-0.0366824	-0.0561208	-0.131894	-0.283005	0.198372	-0.0141812		-0.0869022	0.0581714		-0.0539186	0.0643149		-0.071679	0.0415818
Q9Y263	PLAA	0.680351	0.637865	0.583284	1.12571	0.673736	0.981114	-0.114338	0.652291	0.82414	0.169566	0.19646	0.955232	0.809897		0.652532	0.148499		0.601264	0.138001		0.62887	0.0982542
P51178	PLCD1	0.331396	0.418317	0.187709	0.232715	0.44426	0.340071	0.129949	0.382968	0.382344	-0.089882	0.183448	0.209049	0.0156817		0.297774	0.0445668		0.180601	0.0780661		0.243694	0.0446214
Q9BRC7	PLCD4	-0.0420133	0.404975	0.666734	0.0102015	-0.12706	0.00190082	0.513503	0.282466	0.223516	0.709872	0.30987	-0.13701	0.0335366		0.204034	0.119406		0.237042	0.117253		0.219269	0.0806543
Q15111	PLCL1	0.629159	0.51165	-0.0765315	0.413989	0.501842	0.67576	0.153458	0.506972	0.380716	0.381917	0.521954	0.5828	0.661733		0.401332	0.102289		0.506015	0.0452767		0.449648	0.0586355
Q8IV08	PLD3	-0.282209	-0.23175	-0.295246	0.277287	-0.290943	-0.277237	-0.280218	-0.2913	-0.342554	-0.59206	-0.365309	-0.107886	-0.418049		-0.197188	0.0794709		-0.35286	0.0646863		-0.269037	0.0548354
Q15149	PLEC	-0.409907	-0.331302	-0.555677	-0.440649	-0.187077	-0.290231	-0.616281	-0.456894	-0.425224	-0.555889	-0.492625	-0.216598	-0.29398		-0.404446	0.0566378		-0.406868	0.0520728		-0.405564	0.0372187
Q8TD55	PLEKHO2	0.138697	-0.169845	-0.235201	-0.129814	0.182502	-0.146066	-0.278742	0.0140206	-0.0752756	-0.231707	-0.243968	-0.0646617	-0.13115		-0.0912098	0.0680266		-0.122124	0.0412181		-0.105478	0.039905
P00747	PLG	0.289915	0.583069	0.0537186	0.496273	0.346537	0.170881	-0.463728	0.212839	0.715587	-0.422405	-0.517443	0.261735	0.342501		0.210952	0.131477		0.0988023	0.194146		0.159191	0.110286
O60664	PLIN3	0.0328225	-0.0793024	-0.240749	0.23681	0.0216384	0.299735	-0.0309304	0.136593	-0.0752756	-0.00504072	-0.0418774	0.247178	0.240037		0.0342892	0.0697685		0.0836025	0.0585611		0.0570492	0.0449486
P60201	PLP1	-0.299636	-0.298424	0.137212	0.156951	-0.435133	-0.432093	0.65115	-0.307502	-0.223977	-0.694835	-0.683999	-0.655296	-0.195295		-0.0742818	0.153042		-0.460151	0.0987412		-0.252375	0.106134
O14495	PLPP3	-0.133801	-0.395633	-0.546222	-1.31252	-0.206095	-0.766474	-0.0903672	-0.316864	-0.213253	-0.502908	-0.544458	-1.06614	-0.785585		-0.493016	0.164184		-0.571535	0.127687		-0.529255	0.10257
Q14651	PLS1	0.974438	0.779775	0.610362	1.29108	0.733259	1.43743	0.96035	1.08587	0.760599	0.935398	0.790461	1.60622	1.54679		0.969527	0.113732		1.12089	0.151829		1.03939	0.0915972
P13797	PLS3	0.298999	0.516165	0.476566	0.475967	0.542851	0.918627	0.4267	0.456536	0.174817	0.516059	0.731813	0.804691	0.653809		0.522268	0.0725022		0.556287	0.0929358		0.537969	0.0556792
P55058	PLTP	0.720114	0.341665	-0.158503	1.19057	0.487611	0.511439	-0.205427	0.51029	0.658976	-0.191098	-0.235115	0.361331	0.430482		0.412495	0.184413		0.255811	0.153805		0.340179	0.119221
Q9BX97	PLVAP	-0.997744	-1.3158	-1.55276	-0.758126	-1.0528	-1.02182	-1.08278	-0.843752	-0.956846	-1.17967	-0.81101	-0.997427	-0.85442		-1.11169	0.0959382		-0.94052	0.0560494		-1.03269	0.0607368
Q6UX71	PLXDC2	-0.00553545	0.00861428	-0.14623	-0.345161	-0.199812	-0.0350131	-0.238357	-0.0618037	-0.0650177	-0.297733	-0.15729	-0.38516	-0.528175		-0.137356	0.050361		-0.249197	0.0766281		-0.188975	0.0455091
O43157	PLXNB1	-0.444228	-0.447907	-0.443092	-0.444848	-0.409219	-0.356181	-0.343648	-0.381083	-0.341948	-0.364225	-0.343595	-0.225431	-0.388657		-0.412732	0.0170192		-0.340823	0.0243453		-0.379543	0.0172931
O15031	PLXNB2	-0.27481	-0.200529	-0.315766	-0.272866	-0.107916	-0.301766	-0.365806	-0.216376	-0.292521	-0.447174	-0.249736	-0.125547	-0.157711		-0.26278	0.0320142		-0.248177	0.0468338		-0.25604	0.0264983
O60486	PLXNC1	-0.605595	-0.37112	-0.830924	-0.608454	-0.428206	-0.269306	-0.214287	-0.810795	-0.410952	-0.234783	-0.304346	-0.327373	-0.311941		-0.475413	0.0823477		-0.400032	0.0853127		-0.440622	0.057819
P40967	PMEL	-0.176004	0.027344	-0.471869	-0.358425	-0.4129	-0.267088	-0.734297	0.237893	0.4639	-0.773402	-0.638337	-0.233644	0.0717828		-0.341891	0.0907169		-0.145301	0.200872		-0.251157	0.103806
P29590	PML	-0.900124	-0.972386	-0.953167	-0.662775	-0.869252	-0.772863	-0.851776	-0.905719	-1.15718	-0.737967	-0.883468	-0.547339	-0.652566		-0.85462	0.0406383		-0.81404	0.0883108		-0.835891	0.0444803
Q15126	PMVK	0.295437	0.336077	0.25544	0.424459	0.361098	0.387971	0.209311	0.435198	0.243708	0.434618	0.201856	0.525635	0.425887		0.324256	0.028609		0.377817	0.0515193		0.348977	0.0281105
Q9H307	PNN	-0.0749666	-0.0964092	0.109623	0.0231444	-0.0659947	0.250466	0.228193	-0.143861	-0.162381	0.299931	0.395304	-0.0131598	-0.0784443		0.0534366	0.0549112		0.049565	0.0974464		0.0516497	0.0513636
P00491	PNP	0.484732	0.184251	0.775672	0.52442	0.496369	0.605461	0.970202	0.270726	0.576393	1.02968	0.738164	0.63115	0.389061		0.577301	0.0934675		0.605863	0.109233		0.590483	0.06829
Q8IY17	PNPLA6	-0.00569643	-0.166294	-0.487884	-0.0431172	-0.249818	0.0538748	-0.473501	-0.141792	-0.0583865	-0.400241	-0.364744	0.0405137	0.0107117		-0.196062	0.082809		-0.152323	0.0773061		-0.175875	0.0550918
Q8TCS8	PNPT1	0.166272	0.190885	-0.282855	0.118245	0.195381	0.0779057	-0.387925	0.0861151	0.166759	-0.255898	0.0952947	0.0049666	-0.00448804		0.0111299	0.091539		0.0154581	0.0601111		0.0131275	0.0543254
Q6PEZ8	PODNL1	0.120225	0.460202	-0.291014	-0.407044	0.203771	-0.697262	-0.771478	0.0753221	0.494609	-0.837734	-1.14907	-1.03812	-0.74599		-0.197514	0.177711		-0.533496	0.270736		-0.352583	0.157912
O00592	PODXL	-0.727975	-0.731665	-0.830924	-0.612118	-0.928661	0.213069	-0.239637	-0.769828	-1.3311	-0.561472	-0.689572	-0.594057	-0.244119		-0.55113	0.151926		-0.698358	0.14623		-0.619081	0.103804
Q7Z4H8	POGLUT3	-0.339781	-0.220916	-0.596471	-0.483106	-0.222225	-0.0313709	-0.561276	-0.231186	-0.251914	-0.485873	-0.468985	-0.265132	-0.370829		-0.350735	0.0783333		-0.345653	0.0461445		-0.34839	0.0454098
Q9Y2S7	POLDIP2	0.0617324	0.0331096	-0.204876	0.351702	0.00467163	0.254094	-0.140262	0.0735186	-0.0162132	0.0282302	-0.13718	0.0685611	0.556585		0.0514532	0.0750084		0.0955836	0.09746		0.0718211	0.0581525
P24928	POLR2A	-0.21989	-0.179298	-0.124193	-0.387304	-0.319025	-0.178797	-0.169423	-0.151494	-0.255802	-0.244119	-0.179357	-0.582671	-0.375126		-0.225418	0.0354167		-0.298095	0.0651179		-0.258961	0.0355323
P19388	POLR2E	-0.319952	-0.220172	-0.0119383	-0.102348	-0.291239	-0.194181	0.00134258	-0.0927209	-0.201169	-0.0597552	-0.128081	-0.115939	-0.17678		-0.162641	0.0485077		-0.129074	0.0214272		-0.147149	0.027297
P27169	PON1	0.490566	0.937935	0.215452	1.23676	0.881269	1.20196	0.314221	0.635821	0.722648	0.447444	0.802182	1.07124	0.989736		0.754023	0.157101		0.778178	0.0937995		0.765172	0.0913723
Q15165	PON2	0.352248	0.138793	0.0663371	0.265101	0.226627	0.128814	-0.0641565	0.343267	0.242179	0.0931938	0.157925	0.148189	0.151041		0.159109	0.0518423		0.189299	0.0364586		0.173043	0.0315925
P16435	POR	-0.269466	-0.125624	-0.414002	-0.666775	-0.0701035	-0.687808	-0.355801	-0.172453	-0.218713	-0.403362	-0.370147	-0.82895	-0.630494		-0.36994	0.0914148		-0.437353	0.102355		-0.401054	0.0660207
Q15063	POSTN	-1.06361	-1.22528	-1.22693	-1.08232	-1.15577	-1.22493	-1.49935	-1.08773	-1.13881	-1.3983	-1.35007	-0.972457	-1.45277		-1.21117	0.0545831		-1.23335	0.0789899		-1.22141	0.0448575
Q15181	PPA1	0.833451	0.736567	1.18095	0.947155	0.624887	0.911197	1.54588	0.738513	0.660162	1.66096	1.24439	0.989884	0.952248		0.968584	0.116736		1.04102	0.149748		1.00202	0.0899443
Q9H2U2	PPA2	0.659435	0.685551	0.796724	0.510545	0.708944	0.773803	0.898526	0.604706	0.579898	0.845488	0.871979	0.654733	0.996015		0.719076	0.0461611		0.758803	0.0690836		0.737411	0.0390406
Q86W92	PPFIBP1	-0.985427	-0.84815	-1.01348	-0.0825489	-0.725643	-0.186534	0.00802324	-0.871047	-0.965048	-0.200649	0.0894379	-0.0759112	0.0161242		-0.54768	0.168051		-0.334516	0.189114		-0.449297	0.124186
P62937	PPIA	0.896892	0.990645	1.04331	0.784519	1.28237	0.932162	1.05947	0.929011	0.899824	1.16639	0.980648	1.37151	1.09584		0.998483	0.0591376		1.07387	0.0724794		1.03328	0.0454919
P23284	PPIB	0.0982708	0.260703	0.123226	0.254507	0.00510462	-0.0668479	0.191577	0.309269	0.0364711	0.170952	0.121174	0.280661	0.256331		0.123792	0.0466772		0.19581	0.042939		0.157031	0.0323817
Q08752	PPID	0.635896	0.665762	0.921207	0.496273	0.669951	0.496871	1.03998	0.548452	0.646654	1.00465	0.899961	0.828762	0.703736		0.703706	0.077671		0.772035	0.0692978		0.735243	0.0514237
P30405	PPIF	-0.146522	-0.171456	-0.199822	-0.242798	-0.0327609	-0.133375	-0.0549666	-0.110246	-0.171049	-0.281533	-0.0935834	0.0159718	-0.170577		-0.140243	0.0284323		-0.135169	0.0404795		-0.137901	0.0230931
O43314	PPIP5K2	0.554245	0.351	0.324242	0.552545	0.501734	1.22768	0.0516574	0.517372	0.624198	0.649437	0.757834	0.389572	0.73242		0.509016	0.13704		0.611805	0.0564941		0.556457	0.0767382
P35813	PPM1A	0.480711	0.496189	0.599178	0.618366	1.27254	0.757041	0.512462	1.23901	0.534339	0.616365	0.684863	0.764233	0.923617		0.676641	0.105657		0.793737	0.10434		0.730685	0.0733697
O75688	PPM1B	0.51799	0.509445	0.191464	0.62532	0.708056	0.600459	0.379509	0.529875	0.461367	0.542424	0.428904	0.761383	0.876447		0.504606	0.0652944		0.600067	0.0728452		0.548665	0.0485491
P49593	PPM1F	0.194465	0.173959	-0.208102	0.324428	0.00385803	0.451147	-0.0611351	0.116584	0.228726	0.12465	0.156131	0.181643	0.378364		0.125517	0.0864158		0.197683	0.0397928		0.158825	0.049223
Q9Y570	PPME1	-0.250175	-0.21126	0.148881	-0.161166	-0.117825	-0.133375	0.167186	-0.27702	-0.172926	0.188767	0.0231513	-0.162373	-0.174972		-0.0796762	0.0637224		-0.0958954	0.0694302		-0.087162	0.0450078
P50336	PPOX	-0.0728468	-0.0248184	0.272715	-0.119046	-0.212469	0.371861	0.149739	0.050637	0.109206	-0.0781257	0.253165	-0.180826	-0.324731		0.0521621	0.0818342		-0.0284457	0.0852407		0.0149585	0.0577483
P62140	PPP1CB	-0.050374	0.292314	0.391675	-0.280788	0.0764883	-0.0495736	0.118152	0.175868	0.254428	0.170952	0.0203909	0.11597	0.0363796		0.0711275	0.0855083		0.128998	0.036621		0.097837	0.0479144
P36873	PPP1CC	0.579779	0.629519	0.648537	0.60223	0.614259	0.488379	0.724671	0.56346	0.581726	0.670814	0.740882	0.806376	0.658172		0.612482	0.0270608		0.670238	0.0378179		0.639139	0.0232654
Q15435	PPP1R7	0.010894	0.00336262	0.0345586	-0.0648773	0.210954	0.0986326	0.118152	0.0433333	-0.047916	0.257904	0.111135	0.189954	0.0156817		0.058811	0.0343346		0.0950154	0.0466191		0.0755207	0.0276131
P62714	PPP2CB	0.841303	0.53585	0.516463	0.654759	0.516767	0.495868	0.63231	0.60219	0.543001	0.228709	0.450101	0.377151	0.390128		0.599046	0.0465802		0.43188	0.0540686		0.521892	0.0415341
P30153	PPP2R1A	-0.030106	0.238688	0.396131	0.116043	0.0949593	0.418872	0.485911	0.113507	0.0620946	0.604312	0.493345	0.264892	0.46832		0.245785	0.0733502		0.334412	0.0901528		0.28669	0.0563399
P63151	PPP2R2A	-0.129108	-0.0277624	0.129742	-0.079295	-0.0149157	-0.00247867	0.100253	-0.0445527	-0.101949	0.301812	0.135672	0.0072839	-0.120338		-0.00336643	0.0347645		0.0296547	0.0661144		0.0118741	0.0344756
Q14738	PPP2R5D	-0.0944763	-0.0747792	0.261346	0.324428	-0.0832542	0.00190082	0.171286	-0.058923	-0.122756	0.341015	-0.0351493	-0.144605	-0.0102112		0.0723501	0.0668518		-0.00510483	0.0723248		0.0366017	0.0483055
Q16537	PPP2R5E	0.118904	0.0788405	0.265456	0.383927	-0.00647407	0.425744	0.22687	0.116702	-0.0561362	0.326953	0.302083	0.305253	0.364723		0.213324	0.0602457		0.226596	0.0665958		0.21945	0.0428219
Q08209	PPP3CA	-0.169011	-0.324213	-0.317435	-0.718783	-0.193898	-0.545063	-0.180034	-0.276601	-0.261927	-0.4944	-0.41909	-0.530688	-0.880064		-0.349777	0.0789498		-0.477128	0.0922705		-0.408554	0.060426
Q6IN85	PPP4R3A	0.533043	0.589714	0.488267	0.51567	0.522422	0.618499	0.785767	0.509894	0.483115	0.742045	0.871979	0.716001	0.472754		0.579054	0.0384162		0.632631	0.0681149		0.603782	0.036729
P53041	PPP5C	0.278103	0.0763591	0.0913986	0.712378	0.361396	0.670398	0.548569	0.0738147	0.109671	0.740536	0.539733	0.832785	0.756206		0.391229	0.0986283		0.508791	0.137762		0.445488	0.0809621
O75170	PPP6R2	-0.412299	-0.309016	0.372321	-0.583733	-0.318054	-0.325041	0.3527	-0.273076	-0.179815	0.43736	0.10738	-0.162373	-0.0540347		-0.174732	0.143289		-0.0207597	0.105896		-0.103668	0.0904174
P50897	PPT1	0.281649	0.465588	0.183904	0.159958	0.320374	0.141236	0.190182	0.311239	0.298916	0.156493	0.320699	0.424511	0.267327		0.248985	0.0437278		0.296531	0.0354254		0.270929	0.0283365
O60831	PRAF2	-0.314723	-0.261501	-0.360148	-0.714167	-0.348021	-0.839858	-0.49701	-0.309734	-0.366832	-0.517426	-0.648578	-0.650912	-0.609877		-0.47649	0.0832919		-0.517226	0.0603823		-0.495291	0.0510228
Q06830	PRDX1	-0.0627592	-0.153404	-0.0170765	-0.361295	-0.11559	-0.308662	-0.106271	-0.133568	-0.30215	-0.130295	-0.382214	-0.169775	-0.249195		-0.160723	0.048157		-0.227866	0.0414662		-0.191712	0.032379
P32119	PRDX2	-0.07976	0.165848	0.41845	-0.375643	0.0547737	0.347951	0.484192	-0.111594	0.125637	0.748033	0.292696	-0.0946368	0.0736789		0.145116	0.115591		0.172302	0.130348		0.157663	0.0829458
P30048	PRDX3	0.14901	-0.0305769	-0.126977	-0.130309	-0.229612	-0.0872273	-0.0221854	-0.0606322	-0.227659	0.081719	-0.0141601	-0.160216	0.0221387		-0.0682682	0.0448385		-0.0598017	0.0472883		-0.0643606	0.0311898
Q13162	PRDX4	0.304018	0.135925	-0.0775816	0.500471	0.251262	0.13207	-0.252584	0.198294	0.101562	-0.0848399	-0.264937	0.124008	0.387829		0.14194	0.0939526		0.0769859	0.0926018		0.111961	0.0641323
P30044	PRDX5	0.783826	0.906048	0.716814	0.596857	0.867935	0.764996	0.60571	0.720522	0.712351	0.875196	0.621209	0.980397	0.832692		0.748884	0.044985		0.790395	0.0531281		0.768043	0.033516
P30041	PRDX6	0.379857	0.587726	0.803242	0.166718	0.568834	0.290771	0.719336	0.356324	0.545025	0.756206	0.584449	0.561691	0.339305		0.502355	0.0875251		0.523833	0.0636825		0.512268	0.0534035
P51888	PRELP	-1.32212	-1.24696	-1.24789	-1.76921	-1.28367	-1.6529	-1.76728	-1.376	-1.3005	-1.69019	-1.49344	-1.53495	-1.71683		-1.47001	0.0934813		-1.51865	0.0677095		-1.49246	0.057301
P48147	PREP	0.596481	0.530454	0.738149	0.692131	0.718291	1.11847	0.863844	0.573943	0.529346	1.04074	0.82131	0.974785	0.852743		0.751118	0.0731907		0.798811	0.0848699		0.77313	0.0536145
Q4J6C6	PREPL	0.803711	0.732897	0.58825	0.923228	0.983167	0.732596	0.918325	0.733827	0.674256	0.872707	0.784104	1.19641	1.20733		0.811739	0.0524788		0.911438	0.0956164		0.857754	0.0520144
P17612	PRKACA	-0.0205373	0.160593	0.115708	0.0536311	-0.0903104	-0.00449308	0.20593	0.333079	0.488519	-0.025981	0.243024	-0.226515	-0.335311		0.0600744	0.0401773		0.0794692	0.133564		0.0690258	0.0622336
P22694	PRKACB	-0.178244	-0.133729	0.252217	-0.00123672	-0.223287	-0.0151282	0.488104	-0.127601	-0.0201112	0.0841985	0.415322	-0.158365	-0.441388		0.0269565	0.0971638		-0.0413241	0.116322		-0.0045576	0.0723906
P10644	PRKAR1A	0.710854	0.728329	0.185616	0.581098	0.582415	0.683079	0.212951	0.825749	0.579559	0.183	0.285017	0.647895	0.752818		0.526335	0.0872682		0.545673	0.105265		0.53526	0.0647229
P13861	PRKAR2A	0.26598	0.347829	0.568495	-0.0183533	0.20171	0.0159997	0.322912	0.249632	0.231418	0.421007	0.15869	0.132119	0.0582434		0.24351	0.0764367		0.208518	0.0510779		0.22736	0.0458266
P31323	PRKAR2B	-0.595977	-0.261782	0.0582095	-0.312465	-0.368427	-0.283788	0.218654	-0.667234	-0.37014	0.183	0.0643423	0.187699	-0.113271		-0.220797	0.10323		-0.119267	0.139349		-0.173937	0.0825638
P17252	PRKCA	-0.217473	-0.349611	0.126795	-0.229155	-0.224232	-0.443745	-0.215812	-0.296195	-0.224068	0.423336	0.191535	-0.251887	-0.353655		-0.22189	0.0667669		-0.0851555	0.128951		-0.158782	0.0691746
P14314	PRKCSH	-0.0447859	0.0343188	0.00196811	0.0427225	0.430733	0.0456045	0.0288013	0.203784	0.105049	0.272142	0.00926658	0.337971	0.437699		0.0770517	0.0601375		0.227652	0.063656		0.146559	0.0471449
P78527	PRKDC	-0.104003	-0.0421091	0.118861	-0.115877	-0.131809	-0.0945535	0.276845	-0.0846399	-0.0879168	0.172728	0.117523	-0.0828878	-0.0616581		-0.0132352	0.0581206		-0.00447534	0.0479902		-0.00919218	0.036796
Q13976	PRKG1	-0.12043	-0.127823	-0.214767	0.0216406	-0.0662066	0.0428469	-0.353722	-0.046965	-0.127442	-0.0356577	-0.213882	-0.0282557	-0.111993		-0.116923	0.0518874		-0.0940325	0.0292986		-0.106358	0.030013
O75569	PRKRA	-0.0233435	-0.0950926	0.17162	0.189046	-0.12606	-0.0174346	0.376335	-0.0947455	-0.0573594	0.399214	0.201856	0.0584364	0.0136743		0.0678672	0.0690688		0.086846	0.0754394		0.0766267	0.0488494
Q99873	PRMT1	-0.459708	-0.392189	-0.371585	0.42345	-0.279708	0.0303364	0.171286	-0.417086	-0.394754	-0.0217274	0.0484712	0.337971	0.190067		-0.125445	0.127323		-0.042843	0.125426		-0.0873212	0.0867824
O43490	PROM1	0.685169	0.827382	1.1298	0.892794	0.896746	0.80215	1.51643	0.746976	0.935416	1.12938	0.950146	0.964863	0.642078		0.964353	0.105206		0.89481	0.0707977		0.932256	0.0635922
P07225	PROS1	0.98234	0.602392	-0.123796	0.76655	0.786721	0.190651	-0.142844	0.619922	1.04066	-0.212534	-0.31854	-0.0242106	0.125899		0.437431	0.173689		0.205199	0.214298		0.330247	0.134427
Q9UMS4	PRPF19	-0.201285	-0.245699	-0.00986946	-0.211317	-0.219082	-0.24811	0.276845	-0.254211	-0.204535	-0.121928	0.149856	-0.0571429	-0.219947		-0.122645	0.0734428		-0.117985	0.061074		-0.120494	0.0465827
Q8WWY3	PRPF31	0.24584	0.400309	-0.0439645	0.351702	0.264578	0.779199	-0.0718335	0.321549	0.364884	0.120892	0.163087	0.267831	0.298969		0.275119	0.108977		0.256202	0.0387407		0.266388	0.0591052
O94906	PRPF6	-0.236242	-0.489788	-0.0101316	-0.296407	-0.432484	-0.158786	-0.0073029	-0.280182	-0.302719	0.0311688	-0.197565	-0.263508	-0.327511		-0.23302	0.0716941		-0.223386	0.0539865		-0.228574	0.0441166
Q6P2Q9	PRPF8	-0.480751	-0.491471	0.250519	-0.440649	0.310318	-0.393532	-0.0378031	-0.133568	-0.142084	-0.0245465	-0.170889	-0.538381	-0.350236		-0.183339	0.133354		-0.226617	0.0757672		-0.203313	0.0770103
P41219	PRPH	-1.16011	-0.346308	-1.43444	-1.23646	-0.697404	-1.34903	-1.7162	-1.6499	-1.66644	-1.69019	-1.58516	-1.01238	-1.09151		-1.13428	0.175779		-1.44926	0.126857		-1.27966	0.116053
P23942	PRPH2	0.422787	0.160593	1.68505	0.592681	0.877229	0.380498	1.64107	0.18732	0.572887	1.68986	1.32689	0.446901	0.667157		0.822843	0.232128		0.815169	0.233621		0.819301	0.158127
P60891	PRPS1	0.433225	0.444759	0.281151	0.0281743	0.142373	0.121428	0.109544	0.272536	0.278214	0.33825	0.0547547	0.225375	0.216554		0.222951	0.0625642		0.230947	0.0394798		0.226641	0.0368091
Q14558	PRPSAP1	0.120083	0.150986	0.102911	0.272533	0.148134	-0.104245	-0.127462	0.192409	0.0629987	0.0750774	-0.0699391	0.181643	0.128671		0.08042	0.0547434		0.0951434	0.0394779		0.0872154	0.0333323
O60256	PRPSAP2	0.282634	0.341665	0.250519	-0.129676	0.446822	-0.185109	-0.112308	0.261976	0.257969	-0.196949	-0.180059	-0.115347	-0.172414		0.127792	0.09861		-0.0241373	0.09054		0.0576709	0.0683554
Q96M27	PRRC1	-0.240016	-0.189349	-0.175138	-0.382967	-0.320169	-0.0589529	-0.0364147	-0.218495	-0.295918	-0.104078	0.0584026	-0.313267	-0.188573		-0.20043	0.0480336		-0.176988	0.0563614		-0.18961	0.0352625
P07477	PRSS1	-0.184815	-0.00682805	-0.487884	-0.236858	0.0798234	-0.0753754	-0.346205	-0.252374	0.0659955	-0.256773	-0.167733	-0.0768825	-0.107182		-0.179735	0.0746604		-0.132492	0.0497292		-0.15793	0.0449726
O95084	PRSS23	-0.878969	-0.496419	-0.267951	-1.27008	-0.937901	-0.90075	-0.224996	-0.736763	-1.01328	-0.343819	-0.426992	-1.06614	-0.74599		-0.71101	0.146938		-0.722165	0.120295		-0.716158	0.0927273
P24158	PRTN3	-0.247346	-0.877622	-0.991771	-0.453039	-0.300582	-0.772863	-0.833457	-0.703901	0.107893	-1.02413	-0.852965	-0.714287	-0.992999		-0.639526	0.113349		-0.696731	0.170015		-0.665928	0.0953182
Q9BXM0	PRX	-0.141068	0.688812	-0.383639	-0.526074	0.372151	-1.05092	-1.73888	0.041363	-0.0337576	-1.63306	-1.46312	-0.0646715	-1.23522		-0.397089	0.311723		-0.731413	0.32304		-0.551392	0.220328
Q9BRX8	PRXL2A	0.297045	0.275369	-0.0693123	0.094241	0.406671	0.400565	-0.00109124	0.345482	0.139103	-0.00232405	0.333535	0.0612513	0.818581		0.200498	0.0727336		0.282605	0.121736		0.238394	0.0664368
Q8TBF2	PRXL2B	1.25872	0.42684	0.217265	0.464767	0.515086	0.301216	0.0539369	0.286372	0.3247	0.255607	0.639405	0.0906596	0.385946		0.462547	0.145658		0.330448	0.0738489		0.401578	0.0843934
P07602	PSAP	0.706296	1.20887	0.647352	0.846808	1.11869	1.07573	1.37791	1.44479	0.764214	0.883042	1.50608	1.32058	1.3963		0.997381	0.10239		1.21917	0.128433		1.09975	0.0837458
Q9Y617	PSAT1	0.643996	0.67339	0.559157	0.565542	0.754333	0.740189	0.514753	0.566247	0.602053	0.93831	0.908299	1.07996	1.04941		0.635908	0.0351493		0.857379	0.0904633		0.738126	0.0540575
O75475	PSIP1	-0.153565	-0.662031	0.710393	0.324428	-0.386449	0.332378	0.670121	-0.51522	-0.283649	0.621732	0.593492	0.110001	0.204924		0.119325	0.200059		0.12188	0.187052		0.120504	0.132304
P25786	PSMA1	0.561952	0.594639	0.562979	0.38134	0.639724	-0.215594	0.466936	0.59593	0.541082	-0.161197	0.0145238	-0.0606705	0.515215		0.427425	0.11198		0.240814	0.140864		0.341297	0.0889557
P25787	PSMA2	0.799174	0.542764	0.539263	0.926724	0.70029	0.720774	0.689741	0.540605	0.613666	0.617905	0.938828	0.818749	0.784624		0.702676	0.0517055		0.719063	0.0621077		0.710239	0.0383033
P25788	PSMA3	0.338217	0.346934	0.443513	0.506511	0.460009	0.459716	0.339391	0.241456	0.23036	0.483681	0.219861	0.522444	0.298969		0.41347	0.0264762		0.332795	0.055217		0.376235	0.0301637
P25789	PSMA4	0.374389	0.411626	0.561465	0.460029	0.553128	0.451147	0.584758	0.354238	0.332571	0.653809	0.608111	0.585326	0.632022		0.48522	0.0307942		0.52768	0.0590868		0.504817	0.0310489
P28066	PSMA5	0.742131	0.618888	0.627555	1.06325	0.909442	0.770266	0.588533	0.668327	0.559131	0.791085	0.539733	1.02368	0.872707		0.76001	0.065751		0.742445	0.0771621		0.751903	0.0481178
P60900	PSMA6	0.131923	0.379837	0.461849	0.0440025	0.430733	0.221723	0.423918	0.210343	0.186818	0.578053	0.530353	0.346356	0.363827		0.299141	0.0626636		0.369292	0.0654827		0.331518	0.044539
O14818	PSMA7	0.400822	0.395909	0.440438	0.430539	0.673736	0.546766	0.447031	0.376693	0.386685	0.731567	0.39831	0.808454	0.724702		0.476463	0.0379042		0.571068	0.0831343		0.520127	0.0436036
P20618	PSMB1	0.889185	0.717183	0.836277	0.0971124	1.14644	0.529771	0.657375	0.824846	0.764214	0.744299	0.534578	0.157121	0.680029		0.696192	0.124225		0.617515	0.100554		0.65988	0.0789135
P49721	PSMB2	0.474255	0.454481	0.578932	0.387689	0.799174	0.583117	0.193127	0.399309	0.301819	0.554011	0.146008	0.602136	0.574507		0.495825	0.0710535		0.429632	0.0739177		0.465274	0.0500071
P49720	PSMB3	0.516282	0.444759	0.607927	0.83435	0.644714	1.00041	0.456813	0.449774	0.413804	0.614596	0.376386	0.778006	0.667157		0.643608	0.0780125		0.549954	0.0654782		0.600383	0.0514264
P28070	PSMB4	0.355309	0.169446	0.0369937	0.0138266	0.295902	0.0986326	0.530968	0.185644	0.164576	0.715364	0.355759	0.536827	0.311878		0.21444	0.071354		0.378341	0.0868826		0.290087	0.0581271
P28074	PSMB5	0.451177	0.44873	0.633808	0.346208	0.596481	0.614693	0.469141	0.445013	0.226347	0.608647	0.470481	0.606067	0.529365		0.508605	0.0406688		0.480987	0.0578875		0.495858	0.0332492
P28072	PSMB6	0.561952	0.529257	0.689339	-0.270547	0.679071	-0.198678	0.0755065	0.570633	0.380585	0.274727	-0.133577	0.0258056	-0.0491903		0.295129	0.157427		0.178164	0.112014		0.241145	0.0967917
Q99436	PSMB7	-0.050374	0.729111	0.889549	0.846808	0.279677	0.0444736	0.788014	0.158845	0.0518326	0.778535	0.649327	0.474885	0.423336		0.503894	0.151683		0.422793	0.113705		0.466463	0.0938983
P62191	PSMC1	0.0615975	0.115454	0.182029	0.173985	0.0407361	0.225499	0.153458	0.147718	0.0797122	0.139238	-0.00448302	0.139196	0.0967284		0.136108	0.025312		0.0996849	0.0235877		0.119298	0.0175205
P35998	PSMC2	-0.133801	-0.0305769	-0.0877218	-0.079295	-0.0483178	-0.114862	-0.0419711	-0.158148	-0.0523312	0.025572	-0.187266	0.0764278	-0.105542		-0.0766493	0.0146255		-0.0668812	0.0422743		-0.0721409	0.0200809
P17980	PSMC3	0.305575	0.152459	0.231882	-0.397257	0.304459	-0.637608	-0.408721	0.291294	0.162045	-0.462233	-0.548892	-0.629649	-0.566232		-0.064173	0.151631		-0.292278	0.16639		-0.169452	0.112214
P43686	PSMC4	-0.0420133	0.0830238	0.268342	-0.0164205	0.188787	-0.063682	0.36947	0.0257386	-0.114968	0.217624	0.229383	0.189954	-0.0308958		0.112501	0.0633478		0.0861391	0.0595466		0.100334	0.0421507
P62195	PSMC5	0.451177	0.142434	0.138994	0.0971124	0.479233	0.237452	0.0433377	0.295421	0.277067	0.0652148	-0.0838834	0.0493904	0.0294568		0.227106	0.0653716		0.105445	0.0610806		0.170954	0.0466321
P62333	PSMC6	0.404907	0.503059	0.6121	-0.186804	0.556124	0.0258425	0.289739	0.530191	0.394905	0.215641	0.109772	0.0049666	0.0399969		0.314995	0.111901		0.215912	0.0851508		0.269265	0.0704907
Q99460	PSMD1	0.389835	0.456891	0.465364	0.282814	0.197661	0.223864	0.101992	0.314911	0.198363	0.116942	0.112379	0.159017	0.27065		0.302632	0.0524982		0.195377	0.033826		0.253129	0.0346453
O75832	PSMD10	-0.0592134	0.0561104	0.0753294	-0.193344	0.0661255	-0.100819	0.0123661	0.0399583	-0.0713083	0.202299	-0.0716094	0.0764278	-0.0324359		-0.0204922	0.038254		0.0238886	0.0432834		-8.72591e-06	0.0281967
O00231	PSMD11	0.205332	0.120249	0.0279428	0.434762	-0.0220493	0.320564	0.164115	-0.00198088	-0.0543518	0.27688	0.0529536	0.240364	0.304275		0.178702	0.0603679		0.136357	0.0635673		0.159158	0.0423718
O00232	PSMD12	-0.0992254	0.0408478	0.121371	-0.099812	-0.00781122	-0.0377662	0.132148	-0.022847	-0.0961481	0.217624	0.0437235	0.100295	-0.120338		0.0071074	0.0361229		0.0203848	0.0519889		0.0132354	0.029576
Q9UNM6	PSMD13	0.0732187	0.175739	0.0747718	-0.0709677	0.0307343	-0.121827	0.0909189	0.0987704	0.0207142	0.10696	-0.0238705	-0.0068676	0.208463		0.0360841	0.0383625		0.0673616	0.0358113		0.0505199	0.0257509
O00487	PSMD14	-0.0521434	-0.0650405	0.159196	-0.409374	-0.219034	0.106317	0.215283	-0.183359	-0.159261	0.194907	0.0713284	-0.353133	-0.225389		-0.037828	0.0838776		-0.109151	0.0828816		-0.0707463	0.0576242
Q13200	PSMD2	-0.224923	-0.194583	0.0345586	-0.280788	-0.187077	-0.191653	-0.138406	-0.161596	-0.292229	-0.158415	-0.224633	-0.294432	-0.307775		-0.168982	0.0376357		-0.239847	0.0278827		-0.201689	0.0251964
O43242	PSMD3	-0.0175683	-0.314869	-0.0976846	-0.686653	0.0435028	-0.595482	-0.203284	-0.113662	-0.217119	-0.246198	-0.35668	-0.633796	-0.582969		-0.267434	0.106643		-0.358404	0.0853861		-0.30942	0.0680834
P55036	PSMD4	0.212231	0.302422	0.367651	-0.510253	0.258012	-0.670163	-0.23561	0.856502	0.239789	-0.183074	-0.410352	-0.418543	-0.466662		-0.039387	0.161272		-0.0637233	0.21304		-0.0506192	0.12547
Q16401	PSMD5	0.179504	0.0314276	-0.247707	0.0517429	0.203771	0.141236	-0.0249475	0.108048	-0.129072	0.0096284	-0.0291399	0.184623	-0.0960991		0.047861	0.0584122		0.00799793	0.049062		0.0294627	0.0376088
Q15008	PSMD6	-0.0627592	-0.143327	-0.224819	-0.157939	0.0407361	-0.180434	-0.203284	-0.0114428	-0.204964	-0.0340883	-0.208685	-0.077312	-0.101845		-0.133118	0.0350058		-0.10639	0.0342976		-0.120782	0.0238941
P51665	PSMD7	-0.00921528	0.0501447	0.165981	-0.0672321	0.134073	-0.0553043	0.171286	0.0422925	0.264887	0.339305	0.111135	0.0880744	-0.0848399		0.0556762	0.0388353		0.126809	0.0626909		0.0885067	0.0355898
P48556	PSMD8	-0.0305265	-0.0983167	0.0946724	0.0684557	-0.0434205	0.260791	0.347925	-0.114351	-0.127183	0.282797	0.322313	-0.154105	0.0363796		0.0856543	0.0624575		0.0409753	0.0871989		0.0650332	0.0505355
Q06323	PSME1	0.0920979	0.270288	0.00688742	0.354677	0.391441	0.286272	0.164115	0.278531	0.15552	0.0988221	0.356355	0.705009	0.44509		0.223683	0.0532861		0.339888	0.0895397		0.277316	0.0508519
Q9UL46	PSME2	0.224275	0.424881	0.227025	0.254507	0.526256	0.602041	0.202391	0.413246	0.264887	0.527719	0.451714	0.909872	0.685581		0.351625	0.0621091		0.54217	0.0926768		0.439569	0.0586705
P61289	PSME3	-0.163635	0.0756547	0.0863084	-0.202034	0.0270491	0.0743341	-0.0337013	0.0234356	-0.129847	0.118806	-0.0757154	0.0880744	-0.0219677		-0.019432	0.0451233		0.000464333	0.0389424		-0.0102491	0.0291208
Q92530	PSMF1	0.421818	0.290462	0.121042	0.956611	0.362299	0.640696	0.314221	0.399628	0.326663	0.225886	0.40993	0.690731	0.62086		0.443878	0.103894		0.445617	0.0722522		0.444681	0.0625303
Q8WXF1	PSPC1	-0.315952	-0.24204	0.113924	-0.264423	-0.297819	-0.279611	0.118152	-0.27356	-0.285924	-0.0174096	-0.168918	-0.162373	-0.475314		-0.166824	0.0735711		-0.230583	0.0629023		-0.196251	0.0479829
P26599	PTBP1	0.385778	0.292314	-0.284136	-0.305994	0.173072	-0.0929554	-0.316869	0.263957	0.201095	-0.40722	-0.124863	-0.288959	-0.484844		-0.0212558	0.113858		-0.140139	0.128098		-0.0761249	0.0832977
Q9UKA9	PTBP2	-0.191925	-0.308879	-0.523986	-0.588968	-0.269876	-0.104245	-0.485932	-0.204694	-0.326762	-0.745128	-0.243845	-0.6624	-0.668302		-0.353401	0.06888		-0.475189	0.0989824		-0.409611	0.0588954
Q96EY7	PTCD3	-0.126508	-0.0887061	0.0685356	-0.401802	-0.059165	-0.0962556	0.045944	-0.113402	-0.106731	0.155122	0.0504227	-0.0741033	-0.109183		-0.0939939	0.0583601		-0.0329792	0.0453664		-0.0658333	0.0372809
Q96BW5	PTER	-0.110529	-0.140821	-0.0601964	-0.0431172	-0.0432031	-0.0830537	-0.264668	-0.117533	-0.0987752	0.123383	-0.11456	-0.0068676	-0.277176		-0.106512	0.0296523		-0.0819215	0.0543215		-0.0951628	0.0285782
Q15185	PTGES3	0.329424	0.842475	1.00524	0.990472	0.384056	0.779199	0.984789	0.611405	0.643275	1.03722	0.91953	0.706499	1.06272		0.759379	0.108856		0.830109	0.0822634		0.792023	0.0677886
Q9P2B2	PTGFRN	0.120225	0.460202	-0.291014	-0.555695	0.203771	-0.870691	-0.960202	0.0753221	0.494609	-0.862348	-0.918753	-0.547339	-0.755589		-0.270486	0.208692		-0.419016	0.234884		-0.339039	0.150971
Q16647	PTGIS	-0.801733	-0.876309	-1.04269	-0.786186	-0.940624	-0.739001	-1.0389	-0.879422	-0.845059	-1.00675	-0.759005	-1.17434	-0.783816		-0.889348	0.0461881		-0.908065	0.0640542		-0.897987	0.0370222
Q14914	PTGR1	1.16386	1.25741	1.02641	0.811989	1.13325	0.713137	0.791241	1.04777	1.19589	0.92926	0.498469	1.16658	0.980272		0.985328	0.0803675		0.969706	0.103251		0.978118	0.0615966
Q8N8N7	PTGR2	0.985623	0.999786	0.365794	1.36578	0.810023	1.02308	0.707088	1.1478	0.747798	0.665829	1.03448	1.70788	1.3074		0.893882	0.117495		1.10186	0.156166		0.989873	0.0964499
Q15257	PTPA	0.678319	0.641634	1.01994	0.412841	1.06659	0.716069	1.20164	0.846979	0.829326	1.13406	1.27323	0.666794	0.572274		0.819576	0.106335		0.887111	0.109953		0.850746	0.0739161
Q06124	PTPN11	-0.355334	-0.14948	-0.123796	-0.190524	-0.217296	-0.157378	-0.0817606	-0.294394	-0.218713	0.0083892	-0.0619214	0.0231583	-0.100354		-0.182224	0.0332602		-0.107306	0.0516164		-0.147646	0.0304373
Q12923	PTPN13	0.15489	0.189477	0.0697585	-0.0525743	0.260242	0.188023	0.237837	0.165398	0.107291	0.185572	0.0676852	0.35862	0.526808		0.149665	0.0409329		0.235229	0.0711863		0.189156	0.0397144
Q9H3S7	PTPN23	-0.215091	-0.252808	-0.0299276	-0.436178	-0.248611	-0.305548	0.0375499	-0.283389	-0.242008	0.0083892	-0.113076	-0.13701	-0.172745		-0.207231	0.0611961		-0.15664	0.0420832		-0.183881	0.0374412
P43378	PTPN9	0.368023	0.126768	0.217441	0.761992	0.200402	0.121428	0.290359	0.0948327	0.228693	0.0927484	0.378566	0.010993	0.016738		0.298059	0.0840583		0.137095	0.0579767		0.223768	0.0555456
P18433	PTPRA	-0.00332905	-0.00348147	-0.188342	0.0138266	0.152354	0.0926521	-0.304111	0.0407444	-0.0843842	-0.014544	-0.0600861	0.117597	0.161238		-0.0343472	0.0601008		0.0267609	0.0400552		-0.00614345	0.0368561
P08575	PTPRC	0.00533669	0.00616701	0.00616231	-0.777106	0.00616544	-0.797428	-0.986628	0.00618448	0.00616982	-0.874724	-1.02643	-0.487493	-0.741265		-0.362476	0.175502		-0.519593	0.181295		-0.434991	0.122982
Q13332	PTPRS	-0.385456	-0.342211	-0.202346	-0.422443	-0.350178	-0.341478	-0.476381	-0.357024	-0.396348	-0.305471	-0.444092	-0.274126	-0.455458		-0.36007	0.0322573		-0.372086	0.0299917		-0.365616	0.0213568
Q08623	PUDP	1.24119	1.70807	1.27284	1.03339	0.844782	0.886103	0.55322	1.6839	1.18685	0.684903	2.16677	1.07124	1.29853		1.07709	0.140592		1.3487	0.21039		1.20245	0.123943
Q9UHX1	PUF60	-0.363757	-0.267389	0.071504	-0.440649	-0.401394	-0.452958	0.157187	-0.35482	-0.366142	-0.120017	-0.179357	-0.336093	-0.2523		-0.242494	0.0954281		-0.268121	0.0415568		-0.254322	0.0528911
Q00577	PURA	-0.605595	-0.407019	-0.256046	-0.0749824	-0.464695	-0.187538	-0.0709795	-0.558189	-0.697128	-0.194156	-0.0757154	-0.188437	-0.126489		-0.295265	0.0770702		-0.306686	0.104589		-0.300536	0.0608728
Q96QR8	PURB	-0.593159	-0.436744	-0.484295	0.614352	-0.336934	0.0926521	0.184757	-0.514046	-0.537913	-0.121928	0.0452107	0.318809	0.120148		-0.137053	0.167567		-0.114953	0.142278		-0.126853	0.107064
P20472	PVALB	0.238235	0.0534552	1.35208	0.626595	-0.0460821	0.505212	1.60553	0.135014	0.79393	1.72978	0.991644	0.263357	0.476477		0.61929	0.240575		0.7317	0.238615		0.671171	0.163687
P49023	PXN	0.241591	0.114726	-0.424576	0.426403	0.0565789	0.142376	-0.505933	-0.0825541	-0.159686	-0.371296	-0.632396	0.124008	0.185994		0.00730925	0.130263		-0.155988	0.125708		-0.0680588	0.0903308
P11216	PYGB	-0.0244185	-0.150755	0.3644	0.10507	-0.166547	0.0400434	0.535736	-0.252374	-0.0057504	0.538813	0.269314	0.244774	0.101572		0.100504	0.0991388		0.149391	0.109985		0.123067	0.0708654
P06737	PYGL	0.259003	0.232461	0.924149	0.0596662	0.365739	-0.056709	0.83458	0.146017	0.511161	0.952248	0.666244	0.249789	0.219195		0.374127	0.140784		0.457443	0.127565		0.41258	0.0927863
P11217	PYGM	0.416757	0.510477	0.303849	0.600704	0.939433	0.4907	0.475134	0.724575	0.849101	0.610625	0.609815	0.61743	0.697879		0.533865	0.0758184		0.684904	0.0384757		0.603575	0.0480083
P47897	QARS1	0.371628	0.21734	0.0810839	0.0611823	0.298014	0.282831	0.027017	0.349512	0.352305	0.0921728	0.0620144	0.341182	0.0624408		0.1913	0.0509503		0.209938	0.0617737		0.199902	0.0379466
P09417	QDPR	0.321206	0.389336	0.939682	0.578316	0.304459	0.461993	0.800761	0.228609	0.731031	1.08629	0.916982	0.434016	0.480527		0.542251	0.0927503		0.646243	0.131789		0.590247	0.0766821
Q15274	QPRT	0.275851	-0.0719336	-0.100058	-0.875456	0.473047	-0.728563	-0.688135	0.289358	0.292914	-0.769813	-0.74279	-0.498783	-0.840537		-0.245035	0.199136		-0.378275	0.216842		-0.306531	0.141727
P61026	RAB10	-0.735842	-0.717737	-0.50599	-0.630832	-0.692215	-0.616531	0.0487017	-0.806895	-0.743475	-0.359385	0.0452107	-0.286984	-0.264708		-0.550064	0.103996		-0.402706	0.13095		-0.482053	0.0816036
P62491	RAB11A	0.341829	0.269329	0.133971	0.244057	0.274515	0.275315	-0.0580094	0.447817	0.193374	0.11558	0.257887	0.50498	0.43385		0.211573	0.0507278		0.325581	0.0645521		0.264192	0.0419922
P61106	RAB14	0.153406	0.156082	0.0630133	0.197023	0.0709925	0.143869	0.0241416	0.0718633	0.114983	0.0680216	-0.0699391	0.000359889	-0.0181825		0.115504	0.0237129		0.0278511	0.028036		0.0750488	0.0214863
Q9NP72	RAB18	0.546996	0.415267	0.459816	0.493225	0.582455	0.337338	0.508215	0.441448	0.656235	0.493835	0.455915	0.409344	0.651582		0.477616	0.0311934		0.51806	0.0443688		0.496282	0.0259696
P62820	RAB1A	0.814976	0.793758	0.647352	0.433179	-0.0134373	0.478539	0.678295	0.816126	0.203325	0.549366	0.688451	0.478301	0.527425		0.547523	0.108204		0.543832	0.0847738		0.54582	0.0673387
Q9UL25	RAB21	0.142722	0.0899428	-0.171004	-0.0272332	-0.0583976	0.0863562	0.267895	0.196067	0.135432	0.0680216	0.296097	-0.0646715	0.197169		0.0471829	0.0546624		0.138019	0.05094		0.0891074	0.0383973
P51159	RAB27A	-0.10865	-0.25587	-0.539513	-0.438903	-0.178018	-0.277237	-0.440548	0.00927582	-0.286959	-0.724857	-0.315696	-0.300662	-0.621567		-0.31982	0.0592863		-0.373411	0.107648		-0.344554	0.0568706
P61019	RAB2A	-0.00107482	0.0466169	-0.0565481	0.281753	-0.0362534	0.710147	0.040807	0.0214788	-0.0337576	0.0830656	-0.0798489	0.487006	0.0717828		0.140778	0.10389		0.0916211	0.0830336		0.11809	0.0654354
Q9BZG1	RAB34	-0.378297	-0.354182	-0.500546	-0.0902696	-0.200613	-0.166997	-0.607321	-0.278315	-0.480983	-0.514222	-0.489875	-0.13251	-0.177916		-0.328318	0.0706554		-0.345637	0.069673		-0.336311	0.047789
Q15286	RAB35	0.0263502	-0.0198737	-0.0852296	-0.190524	-0.435017	-0.0530004	0.109544	-0.150911	-0.191487	-0.0174096	0.0529536	-0.305632	-0.161651		-0.0925357	0.0670397		-0.129023	0.0523479		-0.109376	0.0420067
P57729	RAB38	-0.232209	-0.169167	-0.417196	-0.0821155	-0.200515	0.0282639	-0.481256	-0.192307	-0.251625	-0.51288	-0.405032	-0.160216	-0.159125		-0.222028	0.0674134		-0.280197	0.0598108		-0.248875	0.0445147
P20336	RAB3A	-0.176004	-0.33479	0.474513	-0.184871	-0.280139	-0.166997	0.542592	-0.359127	-0.18581	0.478328	0.353261	-0.0846187	-0.129442		-0.0179567	0.138092		0.0120986	0.13418		-0.00408503	0.0928177
P20337	RAB3B	-0.205213	-0.238048	-0.180961	-0.128648	-0.184171	-0.154031	-0.139275	-0.382581	-0.289568	-0.193275	-0.229576	-0.0821797	-0.15795		-0.175764	0.0145306		-0.222521	0.0427725		-0.197344	0.0213061
O95716	RAB3D	-0.264028	-0.230928	0.227247	-0.658311	-0.325305	-0.624162	0.285886	-0.14754	-0.0204916	0.100655	0.0167155	-0.764184	-0.819775		-0.227086	0.140086		-0.272437	0.167658		-0.248017	0.103593
Q9H2M9	RAB3GAP2	-0.247649	-0.194975	-0.0594564	-0.264423	-0.301925	-0.213981	0.0093054	-0.250436	-0.317856	0.0181191	-0.0270368	-0.288959	0.0335366		-0.181872	0.0431749		-0.138772	0.0668047		-0.16198	0.0373976
Q96QF0	RAB3IP	0.337113	0.412203	0.527873	0.318925	0.365875	0.0112961	0.601752	0.342293	0.349781	0.632948	0.639405	0.549551	0.55837		0.367862	0.0711735		0.512058	0.054631		0.434414	0.0486662
P61020	RAB5B	0.372186	0.382517	-0.0253236	0.817468	0.375743	0.527678	-0.0073029	0.38637	0.337438	0.0605902	0.0119062	0.567207	0.459994		0.348995	0.111359		0.303918	0.0905689		0.32819	0.0704146
P51148	RAB5C	0.302842	0.145463	-0.121926	0.669826	-0.0716896	0.275315	-0.127462	-0.0310326	0.0807074	0.00384965	-0.0876223	0.146365	0.139238		0.153195	0.11012		0.0419175	0.0389173		0.101836	0.0617455
P20340	RAB6A	0.256657	0.0367547	0.270106	0.100429	0.0615975	0.0258425	0.253409	0.171939	0.332571	0.296663	0.114194	0.146365	0.248612		0.143542	0.0421772		0.218391	0.0357209		0.178088	0.0289887
P51149	RAB7A	0.274037	0.249373	-0.00162416	-0.0183533	0.355768	0.252262	0.251754	0.33798	0.220752	0.133226	0.325985	0.173863	0.208463		0.194745	0.0547135		0.233378	0.0336008		0.212576	0.0324652
Q15276	RABEP1	1.44675	1.35046	0.956552	1.7854	1.8169	1.67592	1.56171	1.18187	0.986627	1.54679	1.90464	2.09631	2.25047		1.51338	0.11296		1.66112	0.207663		1.58157	0.110365
Q9Y3P9	RABGAP1	-0.346038	-0.274191	-0.0282523	-0.537967	-0.180277	-0.42328	-0.166539	-0.193837	-0.244816	-0.140255	-0.0775208	-0.354558	-0.250882		-0.279506	0.0650393		-0.210311	0.0393515		-0.24757	0.0391897
P63000	RAC1	0.250738	0.441156	0.307504	-0.253522	0.262592	-0.00109086	-0.0134677	0.338971	0.31323	0.0568878	0.0691809	0.0612513	0.184693		0.141987	0.0905453		0.170702	0.0529352		0.15524	0.0525664
P63244	RACK1	0.102047	0.272347	0.111414	0.166718	-0.151757	0.162084	0.127781	0.128037	0.118885	0.0394435	0.10738	-0.0443956	-0.0181825		0.112948	0.0490683		0.0551945	0.0303514		0.0862924	0.0299075
O60216	RAD21	0.00483064	0.0190821	-0.00193873	0.0255266	-0.038953	0.163262	-0.165377	-0.0239382	-0.0574056	-0.183074	-0.325458	-0.256604	-0.317513		0.000918952	0.0366963		-0.193999	0.0529636		-0.089043	0.0410955
P54725	RAD23A	0.458067	0.29927	-0.131164	-0.119046	0.428443	-0.153525	0.174045	0.450723	0.704804	0.296663	0.0925224	0.251141	0.120892		0.136584	0.102074		0.319458	0.0934232		0.220987	0.0719457
P54727	RAD23B	-0.27457	-0.39125	-0.0654918	-0.574956	-0.143249	-0.621261	-0.419288	-0.396637	-0.294972	-0.365681	-0.500965	-0.422698	-0.462233		-0.355724	0.0786556		-0.407198	0.0297161		-0.379481	0.043478
Q92878	RAD50	0.150877	0.100339	-0.203898	0.116043	0.0748202	-0.0495736	-0.36128	0.222717	0.316377	-0.35239	-0.301096	0.156213	-0.0141812		-0.0246673	0.0727343		0.00460685	0.113873		-0.0111562	0.0627353
Q9P0K7	RAI14	-0.206835	-0.0445752	-0.393651	-0.422443	-0.11151	-0.542004	-0.760926	-0.236391	0.0264587	-0.731544	-0.764451	-0.563338	-0.691855		-0.354564	0.0955425		-0.49352	0.130482		-0.418697	0.0783049
P11233	RALA	-0.756547	-0.697267	-0.744584	-1.90393	-0.598753	-1.0021	-0.600963	-0.685437	-0.731594	-0.867492	-0.926282	-0.466409	-0.82941		-0.900592	0.174868		-0.751104	0.0673572		-0.831598	0.0978162
P11234	RALB	-0.474746	-0.420278	-0.452382	-0.315723	-0.180654	-0.393728	-0.460424	-0.359127	-0.316826	-0.427471	-0.44828	-0.279342	-0.288261		-0.385419	0.0396892		-0.353218	0.0292043		-0.370557	0.02469
Q86X10	RALGAPB	-0.203237	-0.463262	-0.11502	-0.305994	-0.479706	-0.146351	-0.083886	-0.151661	-0.22632	-0.0808075	-0.0730731	-0.237464	-0.353655		-0.256779	0.0616832		-0.187164	0.0437307		-0.224649	0.038633
Q9UKM9	RALY	-0.52604	-0.487164	0.0709502	-0.431717	-0.388959	-0.568077	0.027017	-0.472271	-0.410952	-0.0419125	-0.298488	-0.218693	-0.430072		-0.329141	0.10022		-0.312065	0.0661451		-0.32126	0.0595953
P62826	RAN	0.418746	0.517915	0.965143	0.0716912	0.450737	0.209797	0.894623	0.363571	0.402738	0.581316	0.696658	0.0793807	0.175614		0.504093	0.124306		0.383213	0.0955111		0.448302	0.0788484
P43487	RANBP1	0.298999	0.757269	0.843689	0.522451	0.912121	0.671482	0.760109	0.704721	0.482865	0.850267	0.773132	0.770132	0.693503		0.680874	0.0791491		0.712437	0.0513585		0.695442	0.0470585
P49792	RANBP2	-0.294424	-0.116254	-0.223419	-0.389544	-0.347198	-0.354087	-0.463728	-0.183648	-0.140229	-0.379215	-0.664695	-0.526541	-0.291623		-0.312665	0.0432362		-0.364325	0.0826453		-0.336508	0.0432674
O60518	RANBP6	0.336023	0.25399	0.308175	-0.0648773	0.285165	0.227477	0.404613	0.209995	0.286704	0.27688	0.440761	0.0980726	0.173705		0.250081	0.0568199		0.247686	0.0479343		0.248976	0.0362104
P61224	RAP1B	-0.151757	-0.220172	-0.385532	-0.299286	-0.0939475	-0.133375	-0.280218	-0.139965	-0.1009	-0.283378	-0.161746	-0.0741033	-0.0895626		-0.22347	0.0394243		-0.141609	0.0313208		-0.185688	0.027311
P52306	RAP1GDS1	0.347038	0.467315	0.800539	0.205697	0.602262	0.375808	0.848143	0.363571	0.478837	0.82036	0.71788	0.276752	0.322101		0.520972	0.0906865		0.496583	0.091393		0.509716	0.0619094
P61225	RAP2B	0.0589802	-0.0892429	-0.409815	-0.175697	-0.0701035	-0.102715	-0.345861	-0.126513	-0.0752756	-0.299678	-0.270809	-0.0988889	-0.0643366		-0.162065	0.0620081		-0.155917	0.0419818		-0.159227	0.0370798
Q9Y3L5	RAP2C	-0.0104116	0.0329656	0.0932773	-0.0694	-0.010441	-0.0174346	0.280773	0.026871	-0.0128167	-0.0796919	0.218446	-0.123805	0.025572		0.0427612	0.0439585		0.0090958	0.0484565		0.0272233	0.0315478
P54136	RARS1	-0.167822	-0.177865	-0.14571	0.285338	-0.173516	0.183164	-0.0674926	-0.185768	-0.269538	0.103598	0.0287143	0.276752	0.228996		-0.0377006	0.0724917		0.0304591	0.0898484		-0.00624226	0.0553487
P20936	RASA1	0.056742	0.167227	-0.0267102	0.861126	0.0232702	0.624942	-0.292612	-0.00924223	0.160095	0.261479	-0.00247477	0.37922	0.603023		0.201998	0.151542		0.232017	0.0963583		0.215853	0.0893706
Q09028	RBBP4	0.184659	0.179452	0.161664	-0.0149806	0.146744	0.0955496	0.333433	0.175794	0.191635	0.257904	0.0725008	0.440536	0.328136		0.155217	0.0395979		0.244418	0.0525052		0.196387	0.0334229
Q9H477	RBKS	0.0944191	-0.172872	0.806538	-0.103204	0.00377715	-0.152042	0.814203	-0.0404457	0.0421536	0.631518	0.529475	-0.172986	-0.022247		0.184403	0.165327		0.161245	0.136259		0.173714	0.104596
Q9NTZ6	RBM12	-0.0651995	-0.147306	0.233164	-0.085685	-0.138557	0.141236	0.46911	-0.120908	-0.0859177	0.306091	0.307572	-0.0713184	-0.147326		0.0581091	0.0877267		0.0313654	0.0877841		0.0457658	0.0597389
Q96PK6	RBM14	-0.272962	-0.3129	-0.198204	-0.186804	-0.361015	-0.409773	-0.0966515	-0.333327	-0.330855	-0.386138	-0.39468	-0.388264	-0.274621		-0.262616	0.041235		-0.351314	0.0192202		-0.303554	0.0263013
P49756	RBM25	0.293624	0.238559	0.213592	0.293917	0.330658	0.330058	-0.157486	0.310068	0.165681	0.00496788	0.221777	0.554126	0.142264		0.220418	0.065123		0.233147	0.076147		0.226293	0.0475419
P98179	RBM3	-0.438939	-0.759777	-0.452382	-0.231273	-0.641319	-0.331884	-0.337316	-0.688793	-0.330962	-0.225538	-0.335253	-0.37425	-0.310618		-0.456127	0.0701904		-0.377569	0.0654294		-0.41987	0.0477231
Q14498	RBM39	-0.308098	-0.31007	-0.0525956	-0.600859	-0.217817	-0.253866	-0.118659	-0.249347	-0.254559	-0.0526709	-0.372263	-0.705063	-0.341996		-0.265995	0.0664696		-0.329316	0.0878839		-0.29522	0.0525153
Q9Y5S9	RBM8A	0.259421	0.43263	0.493956	-0.256749	0.359387	0.390324	0.567654	0.316926	0.286249	0.55996	0.385681	0.176668	0.410864		0.320946	0.103173		0.356058	0.0529285		0.337152	0.0585675
P38159	RBMX	-0.407605	-0.378385	0.0179651	-0.456304	-0.257796	-0.684566	-0.0523046	-0.356982	-0.395152	0.0860362	-0.408213	-0.394576	-0.438863		-0.316999	0.0915811		-0.317958	0.0815123		-0.317442	0.0594628
P09455	RBP1	1.18953	1.505	0.535003	1.2291	1.43009	1.34643	0.613196	1.91387	0.936717	0.595585	0.745041	1.90437	1.51723		1.12119	0.147313		1.2688	0.239416		1.18932	0.131594
P10745	RBP3	0.163428	0.324637	1.22991	0.192684	1.07908	0.188023	0.748038	0.241456	0.88547	1.04941	1.05767	0.371883	0.237019		0.560829	0.171793		0.640485	0.162833		0.597593	0.114787
P02753	RBP4	1.27254	1.1096	0.339149	1.3211	0.648821	0.620574	-0.0480017	1.25719	1.21859	0.12841	0.198535	1.39645	0.825818		0.751969	0.192792		0.837498	0.226937		0.791444	0.141642
Q9P258	RCC2	0.0176781	0.0522829	-0.00774878	0.0170035	-0.198156	0.101402	-0.0239554	-0.0651888	0.00817212	-0.0327895	0.0656521	-0.129914	-0.0293752		-0.00592771	0.0356142		-0.0305738	0.0269776		-0.0173028	0.0222266
Q15293	RCN1	0.473047	0.254052	0.586557	0.287208	0.38755	0.162084	0.238805	0.548261	0.326831	0.485911	0.0713284	0.337971	0.184693		0.341329	0.0562328		0.325833	0.0730162		0.334177	0.0433771
Q14257	RCN2	0.734326	0.754088	0.601039	-0.107996	0.537424	0.0889088	0.400234	0.867976	0.522545	0.555015	0.478454	0.455452	0.0437848		0.429718	0.123934		0.487205	0.107787		0.45625	0.0802371
Q96D15	RCN3	-0.0613558	-0.112555	0.0259917	-0.340054	-0.190046	-0.504178	0.0361967	-0.0713077	-0.0618974	-0.384546	-0.191393	-0.360578	-0.487379		-0.163714	0.0750796		-0.259517	0.072315		-0.207931	0.0520901
P35243	RCVRN	-0.030106	-0.533247	1.41437	0.0500158	-0.261701	-0.359614	1.34611	-0.180377	0.249917	1.14135	1.01498	-0.364271	-0.277176		0.232261	0.305521		0.26407	0.271966		0.246942	0.198434
Q8IZV5	RDH10	0.712718	0.331136	0.0853173	0.33285	0.712044	0.0486395	-0.0350338	0.582877	0.586089	-0.0526709	0.253165	-0.0692455	0.295065		0.312525	0.115736		0.26588	0.118014		0.290996	0.0795594
Q8TC12	RDH11	0.607536	0.668505	0.294464	-0.0131405	0.607536	0.554448	0.498427	0.821943	0.817814	0.386764	0.668695	-0.0606705	0.429172		0.459682	0.0911133		0.51062	0.137189		0.483192	0.0768647
Q96NR8	RDH12	0.107228	0.0474648	0.876565	0.241564	0.0127667	0.160326	1.05521	0.0492791	0.234261	1.02658	0.699888	0.0317104	0.156255		0.357304	0.160813		0.366329	0.165455		0.361469	0.110583
Q92781	RDH5	0.519759	0.715655	0.399252	0.596857	0.906839	1.15857	0.330001	2.13869	0.826621	0.695598	0.738164	0.837825	1.41106		0.660991	0.110533		1.10799	0.231889		0.867299	0.133298
P35241	RDX	0.146215	0.120249	-0.0415626	-0.101471	0.0826717	0.136899	-0.205427	0.366455	0.0782383	-0.0714922	-0.153276	0.0980726	0.245195		0.0196534	0.0518549		0.0938654	0.0787168		0.0539051	0.0450511
P46063	RECQL	-0.337905	-0.290393	-0.581344	-0.459002	-0.331855	-0.611443	-0.670494	-0.164625	-0.316826	-0.6797	-0.764451	-0.515725	-0.596041		-0.468919	0.0580448		-0.506228	0.0926452		-0.486139	0.0508578
Q00765	REEP5	-0.343405	0.0156103	0.0252537	0.392626	0.192935	0.168281	-0.00975477	-0.194304	-0.459204	0.0860362	0.350294	0.409344	0.371331		0.0630781	0.0860162		0.0939162	0.145058		0.0773111	0.0778345
Q96HR9	REEP6	0.255073	-0.273612	1.28975	-0.0815506	-0.102854	-0.274025	0.799102	-0.0180172	0.0761868	0.739144	0.37327	-0.346947	-0.227281		0.230269	0.226941		0.0993925	0.163763		0.169865	0.139205
Q9P260	RELCH	0.63757	0.711874	0.388178	0.301483	0.191071	0.29368	-0.18614	0.459278	0.731031	-0.244119	0.0119062	0.205993	0.0913205		0.333959	0.112497		0.209235	0.140615		0.276394	0.0867863
Q96D71	REPS1	-0.373334	-0.0719336	-0.641719	-0.363363	-0.556119	0.366747	-0.255525	-0.678411	-0.991427	-0.180469	-0.206691	-0.388264	-0.390737		-0.270749	0.127645		-0.472666	0.126676		-0.363942	0.0911971
O15258	RER1	-0.0378012	-0.199315	-0.330084	-0.860382	0.00629887	-0.521504	-0.331361	-0.0989754	-0.0182548	-0.525013	-0.460322	-0.791457	-0.835764		-0.324878	0.112689		-0.454964	0.139118		-0.384918	0.0865522
Q86VR2	RETREG3	-0.0989107	-0.0608405	-0.121054	0.10866	-0.119129	0.157353	-0.123364	-0.0898404	-0.152024	-0.089882	-0.0742887	-0.0983558	0.0675627		-0.036755	0.0448967		-0.0728047	0.0301196		-0.0533933	0.0272776
Q14699	RFTN1	-0.180245	-0.213098	-0.312099	-0.777106	-0.148351	-0.754263	-0.581515	-0.160355	-0.202762	-0.672055	-0.548892	-0.658913	-0.618726		-0.423811	0.103621		-0.476951	0.0951952		-0.448337	0.0684984
P47804	RGR	0.676712	0.505504	0.433888	0.375131	0.646325	0.444417	0.316217	0.838884	0.653104	0.301812	0.670106	-0.053684	0.656916		0.485456	0.0507131		0.51119	0.133783		0.497333	0.0644051
Q15382	RHEB	0.483219	0.419808	0.370354	0.720022	0.490183	0.356301	0.370619	0.439211	0.423529	0.504244	0.234232	0.467155	0.231319		0.458644	0.0481671		0.383282	0.0488954		0.423861	0.0346701
P08100	RHO	0.197992	-0.0336997	1.54612	0.498381	0.765721	0.469047	1.33913	-0.0568036	0.236509	1.1034	0.956401	0.142227	0.450643		0.683242	0.218822		0.472063	0.189527		0.585775	0.143955
P61586	RHOA	0.227873	0.247057	-0.113468	0.0068473	0.0279589	0.126943	0.0861805	0.268779	0.367542	0.136646	0.10738	0.4654	0.420521		0.0870559	0.0480965		0.294378	0.0608321		0.182743	0.0471658
P08134	RHOC	0.0328225	0.326108	0.430943	0.10507	-0.0309315	0.0138537	0.473384	0.166841	0.345378	0.265033	0.359181	0.114318	0.0156817		0.193036	0.0799668		0.211072	0.0554921		0.20136	0.0481723
Q8IXI1	RHOT2	0.0113614	0.0922233	0.0545486	0.116043	0.00779983	0.0353617	0.263118	0.0682595	0.00873626	0.0216627	0.149027	0.0813186	0.0943931		0.0829223	0.0336245		0.0705662	0.0208641		0.0772195	0.0197805
Q9NPQ8	RIC8A	-0.442798	-0.345655	-0.176207	-0.813685	-0.406871	-0.754263	-0.277655	-0.51182	-0.486272	-0.292136	-0.626984	-0.638679	0.0184781		-0.459591	0.0901935		-0.422902	0.101988		-0.442657	0.0649487
Q5EBL4	RILPL1	-0.250859	-0.177478	-0.279411	0.0138266	-0.283164	-0.292387	-0.485932	-0.254428	-0.255701	-0.45236	-0.45276	0.0302635	-0.361166		-0.250772	0.0565445		-0.291025	0.0736931		-0.26935	0.044031
P12271	RLBP1	0.995269	1.05485	1.14661	0.771722	1.39961	0.817202	1.13812	1.52226	1.01975	1.09952	1.00331	0.859331	1.17787		1.0462	0.0807516		1.11368	0.0925488		1.07734	0.0591361
Q96DB5	RMDN1	0.497753	0.482874	0.584936	0.458867	0.501668	0.590244	0.722556	0.504189	0.504158	0.453398	0.877045	0.529561	0.274727		0.548414	0.0346667		0.523846	0.0801207		0.537075	0.0396301
Q96LZ7	RMDN2	0.0182057	0.688812	0.173431	-0.102042	0.00754377	-0.13352	-0.186547	0.0825918	0.294812	-0.205784	-0.160779	-0.0619479	-0.0873498		0.0665548	0.11307		-0.0230761	0.0753227		0.0251867	0.0685529
Q96TC7	RMDN3	-0.305014	-0.568449	-0.39517	0.110064	-0.149703	0.106317	0.12615	-0.301479	-0.437943	0.111613	0.29101	0.314024	0.194062		-0.153686	0.105642		0.0285479	0.130538		-0.0695783	0.0834831
Q5XPI4	RNF123	-0.0846487	-0.128743	-0.31177	-0.456304	-0.269644	0.033585	-0.308635	-0.132977	-0.220627	-0.241461	0.0407044	-0.570658	-0.495403		-0.218023	0.0627747		-0.27007	0.0930531		-0.242045	0.0527467
Q5VTR2	RNF20	0.0320703	-0.0345543	-0.119916	0.208298	0.091835	-0.00729809	-0.201017	0.105467	0.0688329	-0.137585	-0.247699	0.121769	-0.215398		-0.00436898	0.0508854		-0.050769	0.0687762		-0.0257844	0.0406369
P13489	RNH1	0.281422	0.539612	0.470703	0.603372	0.256657	0.654708	0.579948	0.392142	0.310108	0.598992	0.762506	0.673762	0.922201		0.483775	0.0594796		0.609952	0.0935079		0.54201	0.0544398
Q9H4A4	RNPEP	0.725749	0.731668	0.459816	0.190988	0.467632	0.453631	0.181231	0.615868	0.592977	0.00611802	1.3337	0.339819	0.204924		0.458673	0.0837502		0.515568	0.189061		0.484932	0.0939644
P10155	RO60	0.524001	0.464897	0.310459	0.503525	0.729645	0.559158	0.491551	0.489431	0.402458	0.72655	0.504342	0.774308	0.775681		0.511891	0.0470726		0.612128	0.0675224		0.558154	0.0410053
O75116	ROCK2	-0.334124	-0.234257	-0.248199	-0.718783	-0.320321	-0.530512	-0.526336	-0.247874	-0.335639	-0.39641	-0.571387	-0.310622	-0.574012		-0.416076	0.0679654		-0.405991	0.0561914		-0.411421	0.0430462
Q03395	ROM1	0.568834	0.604925	1.25894	0.450689	0.799174	0.27971	1.5925	0.533821	0.453715	1.50567	1.49112	0.0341188	0.311878		0.793538	0.177455		0.72172	0.255242		0.760391	0.145305
P27694	RPA1	-0.212942	-0.156152	-0.032417	-0.391895	-0.283042	-0.292387	0.0288013	-0.200344	-0.213721	-0.0948832	-0.0418774	-0.188437	-0.466662		-0.191433	0.0565402		-0.200988	0.0598547		-0.195843	0.0393894
P35244	RPA3	0.235182	0.164856	0.0895544	0.831191	0.197748	0.522987	0.160911	0.327027	0.129401	0.45522	0.323646	0.621863	0.505689		0.314633	0.100823		0.393808	0.0701408		0.351175	0.0617474
Q9BWH6	RPAP1	-0.135267	-0.0638386	-0.257835	-0.301943	-0.283977	0.0216761	-0.133419	-0.202972	-0.324031	-0.218178	-0.129548	-0.244706	-0.394093		-0.164943	0.0459011		-0.252254	0.0382858		-0.205241	0.0317334
Q16518	RPE65	0.52584	0.91426	0.613917	0.802481	1.32188	1.21644	0.957602	1.35023	1.11555	0.796227	1.70813	0.908053	1.34691		0.907489	0.110475		1.20418	0.136338		1.04442	0.0931856
P27635	RPL10	-0.561709	0.164974	-0.158503	-0.678104	-0.121666	-0.460563	-0.411547	-0.189813	-0.226035	-0.534052	-0.483236	-0.463069	-0.471986		-0.31816	0.110776		-0.394699	0.060092		-0.353485	0.0641838
P62906	RPL10A	-0.194702	-0.0793024	-0.210591	-0.202034	-0.0170861	-0.146351	-0.0405484	-0.176724	-0.328777	0.0231617	-0.0775208	-0.00448637	-0.0141812		-0.127231	0.0306304		-0.0964213	0.0548667		-0.113011	0.0291748
P62913	RPL11	-0.399797	-0.520616	-0.482076	-0.571857	-0.428206	-0.553044	-0.558082	-0.389818	-0.465435	-0.409814	-0.568396	-0.496699	-0.636027		-0.501954	0.0254789		-0.494365	0.0385012		-0.498451	0.0214718
P30050	RPL12	-0.393861	-0.296871	-0.338337	-0.365557	-0.254388	-0.292387	-0.381599	-0.396637	-0.581788	-0.389759	-0.34212	-0.274126	-0.213028		-0.331857	0.0196879		-0.366243	0.051794		-0.347728	0.0253916
P26373	RPL13	-0.431031	-0.550002	-0.311174	-0.328016	-0.124388	-0.42328	-0.586846	-0.477066	-0.218713	-0.528175	-0.582159	-0.30301	-0.404814		-0.393534	0.059293		-0.41899	0.0564747		-0.405283	0.0396647
P40429	RPL13A	-0.592852	-0.479936	-0.5348	-0.77053	-0.723497	-0.72282	-0.634215	-0.568837	-0.590135	-0.699455	-0.830461	-0.82895	-0.664212		-0.63695	0.0407512		-0.697008	0.046242		-0.664669	0.0305453
P50914	RPL14	-0.301123	-0.146631	-0.152077	-0.510253	-0.472116	-0.512853	-0.330406	-0.0606322	-0.387701	-0.488702	-0.336769	-0.636195	-0.53267		-0.346494	0.0598279		-0.407111	0.0817056		-0.374471	0.0482036
P61313	RPL15	-0.44064	-0.328076	-0.351504	-0.190524	-0.280139	-1.09105	-0.553298	-0.316864	-0.395416	-0.647144	-0.719746	-0.44691	-0.523832		-0.462175	0.113537		-0.508319	0.0625534		-0.483472	0.0653234
P18621	RPL17	0.00385803	0.0687418	0.0452093	-0.375643	0.0635403	-0.481124	-0.210526	-0.00924223	-0.156602	-0.437204	-0.277115	-0.160216	-0.149206		-0.126563	0.0866853		-0.198264	0.0590563		-0.159656	0.0529175
Q07020	RPL18	-0.136466	-0.269747	-0.381549	-0.793188	-0.144338	-0.674782	-0.286766	-0.218479	-0.141131	-0.53211	-0.389667	-0.853602	-0.796887		-0.383834	0.0967586		-0.488646	0.120229		-0.432209	0.0743499
Q02543	RPL18A	-0.510139	-0.299519	-0.19099	-0.628617	-0.636542	-0.950093	-0.55564	-0.31878	-0.406972	-0.633557	-0.713088	-0.750504	-0.790267		-0.538791	0.093365		-0.602195	0.0793901		-0.568054	0.0603508
P84098	RPL19	-0.465169	-0.308395	-0.392974	-0.340054	-0.105614	-0.149655	-0.0480017	-0.238277	-0.614294	0.0884426	-0.15729	0.0906596	-0.436482		-0.258552	0.0596551		-0.211207	0.115149		-0.2367	0.059619
P46778	RPL21	-0.477441	-0.397149	-0.38679	-0.725254	-0.481523	-0.558494	-0.468905	-0.54241	-0.70403	-0.501211	-0.589878	-0.471852	-0.53267		-0.499365	0.0434714		-0.557009	0.0335987		-0.52597	0.0281902
P35268	RPL22	-0.00569643	-0.0971962	-0.176666	-0.286459	0.419348	-0.235696	-0.219817	0.157515	0.188768	-0.447174	-0.312996	-0.30301	-0.177916		-0.086026	0.0913745		-0.149135	0.107765		-0.115153	0.067555
P62829	RPL23	-0.235353	-0.0533124	-0.158503	-0.617518	-0.233443	-0.60759	-0.426822	-0.150911	-0.232578	-0.586299	-0.59456	-0.818837	-0.430072		-0.33322	0.0835625		-0.468876	0.101735		-0.395831	0.0652033
P62750	RPL23A	0.280241	0.470788	0.366553	0.304035	0.425922	0.44529	0.309125	0.432558	0.171144	0.347692	0.359063	0.518172	0.478322		0.371708	0.028892		0.384492	0.0504985		0.377608	0.0268054
P83731	RPL24	-0.27457	-0.197729	-0.113468	-0.438903	-0.0868498	-0.290231	-0.242352	-0.207845	-0.452936	-0.180469	-0.422672	-0.310622	-0.170577		-0.234872	0.0448156		-0.290853	0.0508525		-0.260709	0.0332105
Q9UNX3	RPL26L1	-0.515651	-0.593121	-0.479116	-0.316083	-0.505372	-0.244132	-0.355801	-0.601457	-0.667296	-0.392553	-0.457139	-0.388264	-0.503845		-0.429896	0.0475764		-0.501759	0.0462402		-0.463064	0.0335789
P61353	RPL27	-0.413179	-0.366203	-0.488082	-0.517256	-0.356612	-0.206602	-0.340284	-0.362874	-0.453312	-0.672055	-0.526475	-0.705063	-0.722563		-0.384031	0.0390024		-0.573724	0.0606247		-0.471582	0.0431459
P46776	RPL27A	0.0216384	0.103669	0.0942104	-0.132245	0.226627	0.188023	0.154731	0.0718633	-0.0371598	0.404776	0.187844	0.444365	0.253777		0.0938077	0.0454174		0.220911	0.0763167		0.152471	0.0448328
P46779	RPL28	-0.494411	-0.430266	-0.364055	-0.543216	-0.511897	-0.627454	-0.401593	-0.793533	-0.721324	-0.449313	-0.553611	-0.324638	-0.213028		-0.481842	0.0341581		-0.509241	0.0918661		-0.494488	0.0441887
P39023	RPL3	-0.373334	-0.526481	-0.516941	-1.02492	-0.561182	-0.806639	-0.561276	-0.562416	-0.658576	-0.616906	-0.778432	-0.746631	-0.869994		-0.624397	0.0824883		-0.705492	0.0464014		-0.661825	0.0488077
P62888	RPL30	-0.352938	0.14147	-0.14964	-0.5009	-0.517508	-0.372568	-0.431337	-0.119128	-0.418804	-0.207084	-0.505288	-0.506937	-0.316663		-0.311917	0.0885732		-0.345651	0.0653714		-0.327487	0.0543834
P62899	RPL31	-0.436122	-0.643575	-0.432027	-0.704214	-0.485522	-0.432093	-0.445049	-0.43289	-0.483046	-0.466662	-0.565406	-0.561221	-0.574012		-0.511229	0.043088		-0.513873	0.0246654		-0.512449	0.0248393
P62910	RPL32	-0.561709	-0.0563721	-0.388191	-0.822914	-0.272156	-0.661985	-0.565025	-0.33742	-0.651561	-0.299809	-0.41147	-0.554357	-0.430072		-0.475479	0.0970469		-0.447448	0.054342		-0.462542	0.0558552
P49207	RPL34	-0.580428	-0.652952	-0.50599	-0.341968	-0.568347	-0.384233	-0.297447	-0.741724	-0.651561	-0.295588	-0.302194	-0.329266	-0.236914		-0.475909	0.051156		-0.426208	0.0871791		-0.45297	0.0470882
P36578	RPL4	-0.471754	-0.244383	-0.14964	-0.555695	-0.44385	-0.404616	-0.161228	-0.366217	-0.335651	-0.274417	-0.189719	-0.435172	-0.409955		-0.347309	0.0609075		-0.335188	0.0371502		-0.341715	0.0355981
P46777	RPL5	0.010894	0.275369	-0.156711	0.00578022	0.173072	0.0595251	-0.310527	0.0679635	0.285719	-0.204999	-0.329961	0.00271415	0.0515337		0.00820033	0.0739999		-0.0211717	0.0889057		-0.005356	0.0548837
Q02878	RPL6	-0.39117	-0.2875	-0.193203	-0.128667	-0.4129	-0.056709	-0.228116	-0.538363	-0.44788	-0.310489	-0.158937	-0.402814	-0.186358		-0.242609	0.0495881		-0.340807	0.0611524		-0.287931	0.0397604
P18124	RPL7	-0.584916	-0.652952	-0.455612	-0.996535	-0.729746	-0.746755	-0.569322	-0.688793	-0.667296	-0.65753	-0.746837	-0.866564	-0.85912		-0.676548	0.0653587		-0.74769	0.0385613		-0.709383	0.0392538
P62424	RPL7A	-0.447619	-0.487164	-0.4448	-0.526074	-0.452662	-0.386399	-0.325333	-0.525784	-0.509385	-0.292136	-0.444092	-0.317018	-0.331576		-0.438579	0.0248242		-0.403332	0.0419788		-0.422311	0.0230332
P62917	RPL8	-0.679735	-0.259453	-0.379143	-0.650908	-0.478865	-0.524557	-0.591248	-0.378879	-0.638804	-0.495337	-0.566879	-0.561274	-0.589186		-0.50913	0.0569752		-0.538393	0.0371016		-0.522636	0.0340062
P32969	RPL9	-0.217473	-0.424091	-0.357385	-0.704214	-0.280139	-0.518064	-0.329291	-0.308157	-0.321465	-0.538289	-0.387833	-0.764184	-0.433005		-0.40438	0.0619966		-0.458822	0.0699603		-0.429507	0.0451379
P05388	RPLP0	0.398993	0.356585	0.144077	0.0393396	0.367923	0.0678111	0.0700694	0.359705	0.291658	-0.0217274	0.0620144	-0.0206404	0.170685		0.2064	0.0608126		0.140282	0.0658924		0.175884	0.043831
P05386	RPLP1	0.38755	0.839068	0.407033	0.562366	0.361396	0.414084	0.437277	0.487752	0.629742	0.400364	0.448356	0.263998	0.57116		0.486968	0.0635239		0.466895	0.0528402		0.477703	0.0403944
P05387	RPLP2	0.776578	1.02948	0.780931	0.781174	0.59881	1.12895	0.904188	0.884654	0.610722	0.699439	1.06806	0.939985	1.03407		0.857158	0.0673649		0.872821	0.0747278		0.864387	0.0479661
P04843	RPN1	-0.256186	-0.190974	-0.334056	-0.519335	-0.317664	-0.330724	-0.378018	-0.198136	-0.381115	-0.504199	-0.396563	-0.415729	-0.409955		-0.332422	0.0387478		-0.384283	0.0411661		-0.356358	0.0280324
P04844	RPN2	-0.408103	-0.39125	-0.641719	-0.596907	-0.679735	-0.604539	-0.634215	-0.391995	-0.49262	-1.02413	-0.644785	-0.718887	-0.570507		-0.565209	0.0439771		-0.640487	0.0897882		-0.599953	0.0467805
P46783	RPS10	-0.0757654	0.0214724	-0.0290606	0.0368403	-0.0801217	0.0138537	-0.0983234	-0.0547302	-0.145892	-0.262863	-0.0574188	-0.0973316	0.208463		-0.0301578	0.0208827		-0.0682955	0.0636707		-0.0477598	0.0304489
P62280	RPS11	0.0201539	0.0643088	0.0205545	-0.87323	0.188787	-0.728563	-0.426822	0.106072	0.280357	-0.440556	-0.556304	-0.650912	-0.966693		-0.24783	0.160815		-0.371339	0.193584		-0.304834	0.120355
P25398	RPS12	0.118053	0.577371	0.486743	0.000814514	0.013729	0.0840056	0.476466	0.282466	0.354153	0.335815	0.492294	0.176668	0.35749		0.251026	0.0947905		0.333148	0.0421991		0.288928	0.053863
P62277	RPS13	-0.541951	-0.410025	-0.338337	-0.41992	-0.531629	-0.534064	-0.445049	-0.44563	-0.651561	-0.440556	-0.46477	-0.415729	-0.215398		-0.460139	0.029464		-0.438941	0.0566957		-0.450355	0.029346
P62263	RPS14	-0.377707	-0.215441	-0.205959	-0.351384	-0.342866	-0.29695	-0.333917	-0.281213	-0.581788	-0.327702	-0.357261	-0.321211	-0.284072		-0.303461	0.0256282		-0.358874	0.0460832		-0.329036	0.025472
P62244	RPS15A	-0.533226	-0.706345	-0.686152	-0.517256	-0.593751	-0.525296	-0.598158	-0.609771	-0.856395	-0.575126	-0.728673	-0.268585	-0.511621		-0.594312	0.0290457		-0.591695	0.0816991		-0.593104	0.0388701
P62249	RPS16	-0.44064	-0.558488	-0.411555	-0.63556	-0.552818	-0.505807	-0.32056	-0.496632	-0.627066	-0.332204	-0.39126	-0.455663	-0.607502		-0.489347	0.040051		-0.485054	0.0477211		-0.487366	0.029499
P08708	RPS17	-0.0465371	0.287117	0.090456	-0.274433	0.0691635	-0.296496	-0.153002	0.121169	-0.022136	-0.373668	-0.0742887	-0.310622	-0.222353		-0.0462473	0.0800638		-0.146983	0.0767291		-0.0927407	0.0553911
P62269	RPS18	-0.486212	-0.597131	-0.475942	-0.684404	-0.380545	-0.633766	-0.44929	-0.520331	-0.756722	-0.386138	-0.548892	-0.354558	-0.676763		-0.529613	0.0416344		-0.540568	0.0643425		-0.534669	0.0355714
P39019	RPS19	-0.0738653	-0.18409	-0.327999	-0.17485	-0.0220493	-0.178797	-0.109126	-0.153467	-0.156602	0.0294568	-0.164416	-0.0409152	-0.0102112		-0.152968	0.0371835		-0.0826925	0.0349889		-0.120533	0.0266449
P15880	RPS2	-0.262061	-0.204673	-0.0675815	-0.902194	-0.502992	-0.746755	-0.394619	-0.218949	-0.0961481	-0.745128	-0.466734	-0.968467	-0.886933		-0.440125	0.113335		-0.563727	0.14698		-0.497172	0.0890454
P60866	RPS20	-0.361294	-0.435859	-0.303734	-0.111633	-0.355819	-0.0842315	-0.309752	0.200735	-0.149076	-0.216327	-0.182997	-0.165539	-0.101007		-0.280332	0.0499451		-0.102369	0.0625921		-0.198195	0.0456171
P62266	RPS23	-0.213501	0.017245	0.117275	-0.306092	-0.149703	-0.545063	-0.207302	0.0123953	-0.240251	-0.290159	-0.531578	-0.440677	-0.489387		-0.183877	0.0815225		-0.329943	0.0826971		-0.251292	0.0595508
P62847	RPS24	0.0920979	0.128759	0.0503976	-0.294493	0.0460847	-0.379142	-0.0793522	0.00424394	-0.12475	-0.173413	-0.321752	-0.140432	-0.338268		-0.0622354	0.0754957		-0.182395	0.0528253		-0.117694	0.0486843
P62851	RPS25	-0.307639	-0.285952	-0.169256	-0.299286	-0.120757	-0.160556	-0.07549	-0.402864	-0.483046	-0.0389036	-0.194203	-0.0373805	-0.219947		-0.202705	0.0355447		-0.229391	0.0750367		-0.215022	0.0379169
P62979	RPS27A	-0.668981	-0.55383	-0.0307611	-0.543216	-0.138825	-0.60759	-0.00975477	-0.744569	-0.75302	0.0343978	-0.197565	-0.143077	-0.327511		-0.364708	0.10995		-0.355224	0.1332		-0.360331	0.0816614
P62857	RPS28	0.107607	-0.520616	-0.165959	-0.220755	-0.283003	-0.250045	-0.148291	-0.115721	-0.0206603	-0.144139	-0.240912	-0.356696	-0.287849		-0.21158	0.0707334		-0.194329	0.0503779		-0.203618	0.0429098
P23396	RPS3	-0.355334	-0.223837	-0.327999	-0.486705	-0.264131	-0.274824	-0.301208	-0.296195	-0.395416	-0.297733	-0.382214	-0.242044	-0.331576		-0.319148	0.0323157		-0.324197	0.0236122		-0.321478	0.0197207
P61247	RPS3A	-0.402609	-0.0563721	-0.0942166	0.0368403	-0.325635	-0.00109086	0.0716955	-0.167554	-0.265052	0.0699086	-0.0291399	-0.0321925	0.27065		-0.110198	0.0692958		-0.0255632	0.0762518		-0.071136	0.0505896
P62701	RPS4X	-0.468006	-0.39125	-0.401304	-0.212896	-0.561182	-0.287205	-0.258014	-0.412179	-0.685699	-0.49217	-0.333879	-0.574894	-0.480656		-0.368551	0.0467135		-0.496579	0.050255		-0.427641	0.0375853
P46782	RPS5	0.0354906	-0.394692	-0.581344	-0.498662	-0.287863	-0.361283	-0.127462	-0.32002	-0.497622	-0.392553	-0.317034	-0.528591	-0.566232		-0.316545	0.0804596		-0.437009	0.0442781		-0.372144	0.0491985
P62753	RPS6	-0.343405	-0.238048	-0.263363	0.0611823	-0.202073	0.0216761	-0.358786	-0.341514	-0.277637	-0.449313	-0.435526	0.267831	-0.210733		-0.188974	0.0631985		-0.241149	0.108398		-0.213054	0.0582353
P62081	RPS7	-0.138291	-0.0421091	-0.0710882	0.0556573	-0.153306	0.116403	-0.105077	-0.195958	-0.410952	-0.239351	-0.0730731	-0.077312	0.0335366		-0.0482588	0.0380601		-0.160518	0.0638787		-0.100071	0.0378907
P62241	RPS8	0.255073	0.113414	-0.0654918	-0.196028	0.219136	0.155815	0.316217	0.153229	0.164576	0.263463	0.239469	0.36844	0.22304		0.114019	0.0693388		0.235369	0.0318458		0.170027	0.0423607
P46781	RPS9	-0.75046	-0.789507	-0.614562	-1.36187	-0.697404	-1.17631	-0.726599	-0.883547	-1.03593	-0.753916	-0.977644	-1.23626	-1.40815		-0.873816	0.106013		-1.04924	0.0972575		-0.954782	0.074042
P08865	RPSA	0.768074	0.628268	0.0187434	-0.0453067	0.200109	0.152367	0.0653326	0.469601	0.0585147	-0.123868	0.0738361	-0.0814448	0.0830656		0.25537	0.119333		0.0799508	0.0856203		0.174407	0.0766877
Q8N122	RPTOR	-0.0823232	-0.0523242	0.118745	-0.226936	0.0265008	0.0369546	0.217092	-0.0558626	-0.0404561	0.418283	0.213128	0.0750588	-0.0324359		0.00538701	0.0543598		0.0962858	0.0766381		0.0473403	0.0457842
Q7L523	RRAGA	0.3562	0.367348	-0.00921145	0.146156	0.223285	0.271497	0.165908	0.299501	0.242179	0.231892	0.197789	0.293028	0.298969		0.217312	0.0497112		0.260559	0.0174601		0.237272	0.0276168
Q9HB90	RRAGC	0.0378647	-0.062948	-0.13819	0.36413	-0.0756535	0.266603	0.0591896	-0.0779177	-0.12475	-0.101428	0.00531132	0.194363	0.371331		0.0644279	0.0704291		0.0444849	0.0807754		0.0552234	0.0509748
P10301	RRAS	-0.134146	-0.174619	-0.305658	-1.11025	-0.237861	-0.240476	-0.500769	-0.23571	-0.309884	-0.146927	0.0560453	-0.0254071	-1.13015		-0.386255	0.128675		-0.298673	0.175021		-0.345832	0.102506
P62070	RRAS2	-0.521477	-0.339645	-0.686152	-0.301054	-0.27457	-0.237855	-0.482296	-0.588344	-0.594219	-0.410754	-0.348703	-0.193122	-0.136016		-0.40615	0.0614515		-0.378526	0.0786682		-0.393401	0.0471448
Q9P2E9	RRBP1	0.116492	-0.00949526	-0.4448	0.0281743	-0.0538584	-0.0715421	-0.25694	-0.0506889	-0.274344	-0.197523	-0.353741	0.212305	0.146654		-0.0988527	0.0720342		-0.0862231	0.0938005		-0.0930236	0.0556089
O14718	RRH	0.865496	0.895543	0.450886	0.776395	0.940131	1.17738	0.562734	1.20231	0.812037	0.678107	0.924173	0.977693	1.32653		0.809795	0.0917464		0.986809	0.098607		0.891493	0.0691739
O15537	RS1	0.321206	0.0580629	1.25053	0.0866366	0.198852	-0.180434	2.58712	0.0924158	0.413804	2.25047	2.09655	-0.665638	-0.487379		0.617425	0.3708		0.616704	0.517641		0.617092	0.297568
O76021	RSL1D1	-0.508483	-0.643575	-0.462978	-0.308825	-0.625426	-0.28159	-0.470986	-0.51522	-0.304233	-0.414831	-0.472406	-0.542577	-0.389181		-0.471695	0.0528413		-0.439741	0.0359992		-0.456947	0.0319705
Q15404	RSU1	0.221027	0.131523	-0.406878	0.177998	0.184785	0.181974	-0.363344	0.0942388	0.343145	-0.241461	0.160109	0.0906596	0.260164		0.0181548	0.104694		0.117809	0.0822998		0.0641491	0.0667774
O00442	RTCA	0.366869	0.187389	0.542248	0.194318	0.207552	0.269554	0.601752	0.320489	0.26585	0.472754	0.628327	0.159017	0.230182		0.338526	0.0649438		0.346103	0.0709992		0.342023	0.0458925
Q9Y3I0	RTCB	-0.588353	-0.600965	-0.0607114	-0.429577	-0.583866	-0.527239	-0.102702	-0.548487	-0.590135	-0.0829292	-0.289014	-0.319014	-0.436482		-0.413345	0.088505		-0.377677	0.0765837		-0.396883	0.0571241
Q16799	RTN1	-0.675163	-0.291355	-0.0146127	-0.793188	-0.347198	-0.690235	0.0325702	-0.416797	-0.430414	0.224552	-0.327991	-0.718887	-0.262217		-0.397026	0.125804		-0.321959	0.126569		-0.36238	0.0863621
O95197	RTN3	-0.570794	-0.508414	-0.0244028	-0.721923	-0.31144	-0.725009	-0.149539	-0.659527	-0.497622	0.00139404	-0.39126	-0.617031	-0.375126		-0.430217	0.104134		-0.423195	0.0970517		-0.426976	0.0687887
Q9NQC3	RTN4	-0.465169	-0.589289	0.569505	-0.407044	-0.392728	-0.452958	0.362653	-0.588344	-0.305704	0.596676	-0.0238705	-0.19521	-0.235691		-0.196433	0.174198		-0.125357	0.162846		-0.163629	0.115647
Q9Y224	RTRAF	-0.131556	-0.197729	0.243125	-0.264423	-0.136758	0.190651	0.458328	-0.0262688	-0.0840988	0.142707	0.387406	0.0159718	-0.0202477		0.0230912	0.103143		0.069245	0.070736		0.0443929	0.0622137
Q7L099	RUFY3	-0.0583063	-0.130024	0.258778	-0.0214328	-0.0968764	-0.0389527	0.508215	-0.132404	-0.0630131	0.221014	0.180854	-0.0571429	-0.0731645		0.0602001	0.0888482		0.0126906	0.0607478		0.0382726	0.0536817
Q96GQ5	RUSF1	-0.224997	-0.341864	-0.389224	-0.114104	-0.252205	-0.502878	-0.515679	-0.24098	-0.309005	-0.724857	-0.617275	-0.224035	-0.338268		-0.334422	0.0559685		-0.40907	0.0857495		-0.368875	0.0487113
Q9Y265	RUVBL1	-0.143608	-0.269176	-0.0775816	-0.289843	-0.227536	-0.209935	0.0433377	-0.256011	-0.251637	0.119634	-0.10085	-0.220754	-0.182931		-0.167763	0.0446732		-0.148758	0.0585286		-0.158992	0.0346922
Q9Y230	RUVBL2	-0.358889	-0.465423	-0.0942166	-0.0525743	-0.0947404	-0.206602	-0.214287	-0.568837	-0.39051	-0.184431	-0.345468	-0.10209	-0.2523		-0.21239	0.0575021		-0.307273	0.0675808		-0.256182	0.0442149
P60903	S100A10	-0.945815	-0.731665	-1.0389	-1.03448	-0.857168	-1.02182	-1.14808	-1.27148	-1.20804	-1.10963	-1.0384	-0.60914	-0.686126		-0.968276	0.0519621		-0.987137	0.11266		-0.976981	0.0563485
P31949	S100A11	-0.322492	-0.353598	-0.659454	-0.761612	-0.874447	-0.558494	-0.456559	-0.331957	-0.0697607	-0.719976	0.216932	-0.496699	-0.668302		-0.569522	0.0784514		-0.34496	0.148306		-0.465878	0.0832533
Q99584	S100A13	0.241963	0.403721	0.262767	0.292782	0.0987698	0.385033	-0.0803659	-0.102879	0.233502	0.201098	-0.167141	0.579366	0.579171		0.229239	0.0641644		0.22052	0.130743		0.225214	0.066312
Q96FQ6	S100A16	0.661146	0.571972	0.369728	0.641293	0.505769	1.46511	0.430867	0.461365	0.535015	0.624886	0.544961	0.593806	0.600404		0.663699	0.139451		0.560073	0.024197		0.615871	0.0746367
P26447	S100A4	-0.859675	-0.407019	-0.752028	-0.925363	-0.575359	-0.716991	-1.075	-1.06847	-0.685699	-0.704163	-0.71642	-0.290715	-0.542416		-0.758776	0.0841049		-0.667981	0.103676		-0.716871	0.0643601
P06703	S100A6	0.933401	0.937898	0.414484	0.81036	0.907527	1.32617	0.628219	1.12798	0.770596	0.680029	1.08541	1.45095	1.28002		0.851151	0.107476		1.06583	0.120339		0.950234	0.0827606
P05109	S100A8	0.144788	0.247057	0.0416297	0.568613	0.724003	0.334155	-0.237484	-0.202409	0.894131	1.02353	0.272792	0.658837	0.789754		0.260395	0.121954		0.572773	0.187247		0.404569	0.112994
P06702	S100A9	0.133548	0.0770981	0.0166979	0.321763	0.385778	0.467724	-0.0966515	-0.261543	0.787701	1.10862	0.418088	0.333289	0.465685		0.186565	0.0788119		0.475306	0.188429		0.31983	0.101128
P04271	S100B	1.54586	1.42859	0.945714	1.57855	1.74327	1.37106	0.907331	1.17105	0.947485	0.517597	1.62156	2.25058	1.56246		1.36005	0.120571		1.34512	0.246084		1.35316	0.124756
Q9NTJ5	SACM1L	-0.133801	-0.395633	-0.546222	-0.77053	-0.206095	-0.640424	-0.348374	-0.316864	-0.213253	-0.550163	-0.400487	-0.928741	-0.808734		-0.43444	0.0871943		-0.536374	0.11538		-0.481486	0.0694423
Q9UBE0	SAE1	-0.0972577	0.186082	-0.0320801	0.462312	0.0875859	0.502891	0.844008	-0.15953	0.0980375	0.834993	0.889531	0.5173	0.418639		0.279077	0.127856		0.433162	0.167394		0.350193	0.101397
Q15424	SAFB	0.44578	0.465349	0.216019	0.484203	0.615599	0.37921	0.301509	0.48825	0.390204	0.510243	0.163087	1.02055	0.824162		0.415381	0.0493445		0.566082	0.125918		0.484936	0.0646141
Q14151	SAFB2	0.226075	0.318836	0.487875	0.293454	0.394454	0.392656	0.53426	0.295421	0.43485	0.531271	0.461632	0.462092	0.412597		0.37823	0.0410297		0.432977	0.0319744		0.403498	0.0266817
P10523	SAG	0.190047	-0.00228097	1.72552	0.710781	0.477582	0.206325	1.53015	0.0231579	0.442146	1.6211	1.20009	0.163705	0.314772		0.69116	0.257591		0.627495	0.259974		0.661776	0.175914
Q9Y3Z3	SAMHD1	-0.4887	-0.293771	-0.696724	-0.591034	-0.342866	-0.366669	-0.782506	-0.359127	-0.574227	-0.69756	-0.693908	-0.357545	-0.168549		-0.508895	0.0709409		-0.475153	0.0872609		-0.493322	0.0533182
Q9Y512	SAMM50	-0.135103	-0.00876662	0.053671	-0.17808	-0.00972479	-0.269306	0.132148	-0.0728238	-0.134317	0.0430503	-0.13718	0.121769	-0.304879		-0.0593087	0.0530909		-0.0807302	0.0612892		-0.0691955	0.0386102
O00422	SAP18	-0.0103414	0.0783705	0.143437	0.153668	-0.0694497	-0.0729738	0.0716955	0.0585372	-0.0240728	0.0884426	-0.0539423	-0.035172	-0.14533		0.042058	0.0356382		-0.0185896	0.0341675		0.0140668	0.02535
Q9NR31	SAR1A	-0.57715	-0.45668	-0.366217	0.0611823	-0.392728	0.213069	0.445028	-0.421263	-0.581788	0.282797	0.440761	0.280661	0.0027152		-0.153356	0.147404		0.000647349	0.170192		-0.0822777	0.109139
Q9Y6B6	SAR1B	0.731768	0.601896	0.206298	1.03339	0.732951	0.893795	0.640853	0.713085	0.489384	0.451249	0.814476	1.15417	0.9746		0.691564	0.0984603		0.766161	0.111792		0.725993	0.0716147
P49591	SARS1	0.234305	0.0790171	0.248538	-0.079295	0.262592	0.0660465	0.339391	0.182775	0.233502	0.402193	0.187844	0.316993	0.24303		0.164371	0.0553303		0.261056	0.0344581		0.208995	0.0353011
Q15020	SART3	-0.294321	-0.267304	-0.236504	-0.342132	-0.212291	-0.219297	-0.431337	-0.274832	-0.345907	-0.137585	-0.403083	-0.201067	-0.229039		-0.286169	0.0296906		-0.265252	0.0397174		-0.276515	0.0234469
Q9Y3A5	SBDS	0.531807	0.541497	0.524351	0.571564	0.608593	0.84338	0.532204	0.497197	0.399739	0.72522	0.610984	0.759072	0.629032		0.593342	0.0431492		0.603541	0.0555413		0.598049	0.0331159
O95248	SBF1	-0.259058	-0.142263	-0.219988	-0.133533	-0.20823	-0.0902928	-0.409899	-0.183936	-0.306838	-0.28713	-0.432253	-0.151491	-0.281059		-0.209038	0.0400084		-0.273784	0.0406056		-0.238921	0.0288937
Q8N9R8	SCAI	0.0328225	0.0916354	0.25299	0.076312	0.0595544	-0.118709	0.270397	0.0738147	0.105898	0.215641	0.297879	0.111999	0.245195		0.0950002	0.0504455		0.175071	0.0368154		0.131956	0.0328413
Q6ZMJ2	SCARA5	0.00533669	0.00616701	0.00616231	-0.882926	0.00616544	-0.708712	-0.89965	0.00618448	0.00616982	-0.902755	-0.98789	-0.714287	-0.737967		-0.352494	0.170544		-0.555091	0.182302		-0.446	0.122767
Q14108	SCARB2	-0.1461	-0.0469597	-0.361472	-0.119046	0.215212	-0.0174346	-0.198076	0.0183003	-0.286959	-0.257679	0.0859238	0.0572626	0.220375		-0.0962679	0.0671469		-0.0271295	0.0824398		-0.0643579	0.0511846
Q8NBX0	SCCPDH	0.548903	0.3346	0.387884	0.689293	0.351241	0.102524	0.731553	0.355241	0.408607	0.113987	0.859655	-0.0234369	0.3064		0.449428	0.0836633		0.336742	0.123722		0.397419	0.0713523
Q8WVM8	SCFD1	0.776578	0.282256	0.0345586	0.32276	0.270221	0.557748	0.354538	0.438948	0.186818	0.371331	0.37327	0.293028	0.311878		0.371237	0.089068		0.329212	0.0354227		0.351841	0.0491296
Q96I15	SCLY	-0.371024	-0.302787	-0.287452	0.132336	-0.512984	-0.235696	-0.0204556	-0.422571	-0.470004	-0.379215	-0.243845	-0.646587	-0.379509		-0.228295	0.0821981		-0.423622	0.0541921		-0.318446	0.056338
P22307	SCP2	0.540181	0.574231	0.292452	0.426403	0.504272	0.118951	0.115545	0.537855	0.173826	0.0394435	0.163087	0.337971	0.465685		0.367434	0.0732938		0.286311	0.0789301		0.329992	0.052732
Q14160	SCRIB	0.76073	0.152459	-0.173391	1.10007	0.47643	0.717125	-0.0142165	0.280058	0.449282	0.482568	0.299626	0.786709	0.837732		0.431315	0.17467		0.522662	0.0973969		0.473476	0.10105
Q12765	SCRN1	0.585761	0.675158	1.17298	0.779379	0.70029	0.678757	1.39556	0.736313	0.779218	1.43788	1.15448	0.927271	0.841471		0.855412	0.115353		0.979439	0.109813		0.912655	0.0788673
[truncated: 512 more rows]
