# Supplementary material for: Proteomics of Primary Uveal Melanoma: Insights into Metastasis and Protein Biomarkers
Source: Cancers (Basel). 2021 Jul 14;13(14):3520. doi: 10.3390/cancers13143520 (PMC8307952; doi:10.3390/cancers13143520)
Supplement: Supplementary file 1 [file cancers-13-03520-s001.zip › Table S3. pUM Individual LC MSMS iTRAQ Data.xlsx]

## Sheet: Table S3. Individual pUM iTRAQ
Supplementary Table S3. iTRAQ Quantitative Proteomic Results from n = 100 pUM
Sample ID		UM1	UM2	UM3	UM53	UM5	UM6	UM7	UM50	UM9	UM10	UM11	UM47	UM13	UM14	UM15	UM17	UM18	UM19	UM41	UM21	UM22	UM38	UM25	UM26	UM33	UM34	UM29	UM30	UM31	UM27	UM28	UM35	UM36	UM23	UM24	UM39	UM40	UM20	UM42	UM16	UM45	UM46	UM12	UM8	UM4	UM54	UM55	UM56
Total proteins quantified		2186	2189	2171	2194	2425	2430	2422	2432	2420	2419	2420	2420	2772	2773	2765	2681	2679	2678	2683	2678	2676	2681	2531	2536	2530	2534	2818	2817	2816	2609	2604	2604	2609	2654	2652	2652	2656	2654	2657	2395	2403	2402	2569	2581	2313	2316	2315	2187
Standard Deviation		0.589476	0.550862	0.510205	0.505917	0.551842	0.588721	0.559662	0.539099	0.580488	0.439651	0.58922	0.468494	0.640437	0.509732	0.528537	0.530685	0.518812	0.528623	0.513016	0.557651	0.424669	0.355632	0.511026	0.523162	0.472471	0.537865	0.56163	0.593653	0.497426	0.515541	0.632039	0.459783	0.515001	0.612115	0.591785	0.357833	0.510765	0.591198	0.501569	0.456089	0.470842	0.587928	0.606363	0.540537	0.505979	0.528474	0.526784	0.550338
Analysis Batch		1	1	1	1	2	2	2	2	3	3	3	3	4	4	4	5	5	5	5	6	6	6	7	7	7	7	8	8	8	9	9	9	9	10	10	10	10	11	11	12	12	12	13	14	15	15	15	1
Metastasizing		No	No	No	No	No	No	No	No	No	No	No	No	No	No	No	No	No	No	No	No	No	No	No	No	No	No	No	No	No	No	No	No	No	No	No	No	No	No	No	No	No	No	No	No	No	No	No	Yes
UniProt Accession	Gene	LN Ratio Relative to Choroid Control from UM eyes
A0A075B6K4	IGLV3-10	-0.071341	-0.0714452	-0.0705412	-0.0720964	-0.0721662	-0.0722391	-0.0722065	-0.0726154	-0.0718019	-0.0710434	-0.072789	-0.0713537	-0.0705533	-0.0704325	-0.0710548	-0.0713588	-0.0713768	-0.0722234	-0.0711924	-0.935959	-0.482263	-1.4454	-0.0720632	-0.072483	-0.0735226	-0.0722858	-0.0666033	-0.0683238	-0.0740938	-0.0712652	-0.0701293	-0.0708997	-0.0700396	-0.0667255	-0.0654228	-0.0757322	-0.0653662	-0.0710484	-0.072427	-0.0696482	-0.0732392	-0.0716616	-0.0720372	-0.0713852	-0.0714106	-0.0723681	-0.0719338	-0.070381
A0A0B4J2D5	GATD3B	0.383399	0.283603	0.275563	-0.0537665	0.0329685	0.0316675	-0.21396	-0.385762	0.201089	-0.153098	0.129855	-0.442249	0.0316576	-0.0718693	0.000148328	0.0486516	-0.140855	-0.333112	-0.370535	0.239501	0.301033	-0.0754898	0.222506	-0.0315004	0.474421	-0.478562	0.0630792	0.359529	-0.177353	0.335812	-0.0395642	-0.411977	0.305565	-0.0556508	-0.0118049	-0.233007	-0.0430648	-0.190313	0.102635	-0.0795285	-0.158795	-0.310465	0.249333	0.0625988	-0.374387	-0.349271	-0.52356	0.564052
A0A0C4DH25	IGKV3D-20	-1.56078	-1.53746	-0.370439	-1.54433	-1.52129	-1.65641	-1.55636	-1.66385	-1.56111	-1.13753	-1.72599	-1.66084	-1.65338	-1.25254	-1.71493	-1.75187	-1.39033	-1.56555	-1.7387	-1.52792	-1.1604	-1.25001	-1.49321	-1.61907	-0.890339	-1.55089	-1.57012	-1.51809	-1.1772	-1.37031	-1.38393	-1.27192	-1.36825	-1.26484	-1.26324	-1.27054	-1.44758	-1.26807	-1.46091	-0.862723	-1.54284	-1.5692	-1.42289	-1.81432	-1.18036	-1.3781	-1.61287	-1.48363
A0A0C4DH41	IGHV4-61	-0.071341	-0.0714452	-0.0705412	-0.0720964	-0.0721662	-0.0722391	-0.0722065	-0.0726154	-0.0718019	-0.0710434	-0.072789	-0.0713537	-0.0705533	-0.0704325	-0.0710548	-0.0713588	-0.0713768	-0.0722234	-0.0711924	-0.0705648	-0.0705155	-0.0709777	-0.0720632	-0.072483	-0.0735226	-0.0722858	-0.0666033	-0.0683238	-0.0740938	-0.0712652	-0.0701293	-0.0708997	-0.0700396	-0.0667255	-0.0654228	-0.0757322	-0.0653662	-0.0710484	-0.072427	-1.33844	-2.11307	-1.75758	-0.0720372	-0.0713852	-0.0714106	-0.0723681	-0.0719338	-0.070381
A0A140G945	CRYAA2	-1.6723	-1.68953	-1.81767	-1.84819	-1.16144	-0.809577	-1.06746	0.493719	-1.73317	-2.33655	-2.02815	-2.11666	-1.76015	-1.95835	-2.02076	-0.384438	-1.7477	-1.62487	-1.43441	-1.60662	-2.15624	0.209371	-2.38812	-2.26539	-2.50352	-2.38856	-1.86781	-2.01008	-2.11733	-1.38165	-1.27303	-1.11456	-0.282499	-0.965138	-1.06506	0.884745	-1.22726	-1.80632	-1.99144	-2.333	-2.48876	-1.41607	-2.10734	-1.85517	-2.32113	-2.69785	-3.10569	-1.56102
A0A1B0GUS4	UBE2L5	0.10383	0.17574	0.16109	0.158036	0.256555	0.0620229	0.177146	-0.0841474	0.218433	0.358873	0.274813	0.145684	0.120955	0.187189	0.227243	0.00622187	0.0465257	0.171035	0.0446155	0.0362508	0.0351771	0.0883318	0.406522	0.211587	0.243724	0.191484	-0.371264	0.0404587	-0.0311827	0.171519	0.0623774	0.18751	0.247611	0.0602452	0.187136	-0.113217	0.219595	0.242624	0.363868	0.108802	0.165593	0.0919428	0.204851	-0.0860665	0.130754	0.0228447	-0.00537499	0.0380932
A0AVT1	UBA6	-0.149054	-0.0776851	0.000539681	-0.124427	-0.221557	0.0309879	-0.280675	-0.269202	0.128794	-0.186439	-5.90782e-18	-0.0870504	-0.24732	-0.375152	-0.38767	0.232432	0.0758989	-0.237741	-0.0547324	0.427039	0.0862447	0.201403	0.0506601	-0.187761	0.222828	-0.0383782	0.156254	0.323	0.209721	-0.542706	-0.595443	-0.568448	-0.467115	-0.34787	0.0336484	-0.624725	-0.585643	-0.221197	-0.382182	0.0504411	0.219326	0.375375	0.176182	-0.168394	-0.472991	-0.451141	-0.603708	-0.159372
A0FGR8	ESYT2	-0.131493	0.0376195	-0.16281	0.464025	-0.255894	-0.171585	-0.144303	0.0318228	-0.19927	-0.236837	-0.247767	0.0264959	-0.251526	0.122816	0.213467	0.0186136	0.187223	-0.0303732	0.299383	-0.169819	-0.102272	0.0365139	-0.329352	-0.166087	-0.0789221	-0.136935	0.228358	0.0111348	0.277538	0.023386	-0.086902	-0.0732457	-0.103251	-0.326041	0.0604482	-0.175364	-0.00028013	0.0390662	0.0805257	-0.539942	0.337682	0.186803	-0.310158	0.198522	0.0901428	0.242937	0.559632	-0.0931198
A0MZ66	SHTN1	-0.461369	-0.387302	-0.245609	-0.15233	-0.460747	-0.230284	-0.0645798	-0.417562	-0.378151	-0.261782	-0.668432	-0.164132	-0.230348	-0.118405	-0.290733	-0.319256	-0.231728	-0.215954	-0.256599	-0.144492	-0.0343967	0.0552472	-0.184513	0.0905268	-0.038248	0.362953	-0.341325	-0.261787	-0.137012	-0.371755	-0.339338	-0.0798033	-0.174789	-0.0776486	-0.0514757	0.306678	-0.0580988	-0.350425	-0.355951	-0.494431	-0.214257	-0.630374	-0.329677	-0.662682	-0.0714106	-0.0723681	-0.0719338	-0.189287
A1IGU5	ARHGEF37	-0.071341	-0.0714452	-0.0705412	-0.0720964	-0.0721662	-0.0722391	-0.0722065	-0.0726154	-0.0718019	-0.0710434	-0.072789	-0.0713537	-0.0705533	-0.0704325	-0.0710548	-0.0713588	-0.0713768	-0.0722234	-0.0711924	-0.0705648	-0.0705155	-0.0709777	-0.0720632	-0.072483	-0.0735226	-0.0722858	-0.0666033	-0.0683238	-0.0740938	-0.281795	-0.171723	-0.195063	-0.258613	-0.0667255	-0.0654228	-0.0757322	-0.0653662	-0.0710484	-0.072427	-0.0696482	-0.0732392	-0.0716616	-0.0720372	-0.0713852	-0.0714106	-0.0723681	-0.0719338	-0.070381
A1L0T0	ILVBL	0.069205	0.252145	-0.0424905	0.293479	0.112219	-0.22302	0.107352	0.37119	-0.112463	-0.137398	0.184044	0.525854	-0.107394	0.0652429	0.0612957	0.0283513	-0.212253	-0.0648995	0.348291	-0.501482	-0.19043	-0.0294655	0.179901	-0.296058	0.176897	-0.273522	-0.0481705	0.0346215	-0.135987	-0.0402794	-0.225404	0.139373	-0.00792833	-0.213698	0.0298306	-0.421564	-0.208262	0.0356072	0.295254	-0.0736543	0.0873281	0.0174179	-0.147092	0.175011	-0.0453261	0.0667951	0.232074	0.0620064
A2RRP1	NBAS	-0.0992847	0.114682	0.07934	0.30587	-0.0651049	0.0405062	0.174873	-0.143615	-0.278003	-0.194976	-0.370429	-0.335369	-0.190217	-0.272099	-0.147788	0.164187	0.196038	0.261239	0.0477286	-0.018352	-0.291621	-0.0380861	-0.292819	-0.0488368	0.0368502	0.122819	-0.0869961	-0.310157	-0.173549	-0.235744	-0.492713	-0.382392	-0.475397	-0.0769869	-0.230698	-0.0372539	-0.100727	-0.275893	-0.216235	-0.294877	0.248479	0.198656	-0.384913	-0.0211328	0.0529492	-0.162569	-0.208915	-0.0110867
A2RTX5	TARS3	-0.071341	-0.0714452	-0.0705412	-0.0720964	-0.0721662	-0.0722391	-0.0722065	-0.0726154	-0.0718019	-0.0710434	-0.072789	-0.0713537	-0.0705533	-0.0704325	-0.0710548	-0.0713588	-0.0713768	-0.0722234	-0.0711924	-0.0705648	-0.0705155	-0.0709777	-0.0720632	-0.072483	-0.0735226	-0.0722858	-0.448803	0.0889516	-0.0441069	-0.0712652	-0.0701293	-0.0708997	-0.0700396	-0.0667255	-0.0654228	-0.0757322	-0.0653662	-0.0710484	-0.072427	-0.0696482	-0.0732392	-0.0716616	-0.0720372	-0.0713852	-0.0714106	-0.0723681	-0.0719338	-0.070381
A3KMH1	VWA8	-0.261797	-0.229966	-0.0374318	-0.197318	-0.134165	-0.206682	-0.146347	-0.0160948	-0.507309	-0.139933	-0.452767	-0.260155	-0.300496	-0.0550661	-0.594712	0.120716	-0.154747	0.0341516	-0.136335	-0.299686	-0.14083	-0.499723	-0.226315	0.0159704	0.233937	-0.210528	-0.318532	-0.320741	-0.31409	-0.0737391	-0.495589	-0.133993	-0.270855	-0.219952	-0.243541	-0.168893	-0.158027	-0.200751	-0.0273634	-0.0677061	-0.197624	-0.153043	-0.0205226	-0.153079	-0.107039	0.0171212	-0.0248584	-0.15453
A3KN83	SBNO1	-0.071341	-0.0714452	-0.0705412	-0.0720964	-0.0721662	-0.0722391	-0.0722065	-0.0726154	-0.0718019	-0.0710434	-0.072789	-0.0713537	-0.0705533	-0.0704325	-0.0710548	-0.0713588	-0.0713768	-0.0722234	-0.0711924	-0.0705648	-0.0705155	-0.0709777	-0.0720632	-0.072483	-0.0735226	-0.0722858	-0.0666033	-0.0683238	-0.0740938	-0.0712652	-0.0701293	-0.0708997	-0.0700396	-0.0667255	-0.0654228	-0.0757322	-0.0653662	-0.0710484	-0.072427	-0.0696482	-0.0732392	-0.0716616	-0.0720372	-0.547898	-0.0714106	-0.0723681	-0.0719338	-0.070381
A4D1E9	GTPBP10	-0.071341	-0.0714452	-0.0705412	-0.0720964	-0.0721662	-0.0722391	-0.0722065	-0.0726154	-0.0718019	-0.0710434	-0.072789	-0.0713537	-0.0705533	-0.0704325	-0.0710548	-0.0713588	-0.0713768	-0.0722234	-0.0711924	-0.0705648	-0.0705155	-0.0709777	-0.0720632	-0.072483	-0.0735226	-0.0722858	0.199791	0.261052	-0.0127918	-0.0712652	-0.0701293	-0.0708997	-0.0700396	-0.0667255	-0.0654228	-0.0757322	-0.0653662	-0.0710484	-0.072427	-0.0696482	-0.0732392	-0.0716616	-0.0720372	-0.0713852	-0.0714106	-0.0723681	-0.0719338	-0.070381
A4D1P6	WDR91	0.208118	0.235553	0.158704	0.430942	0.432147	0.256863	0.409187	0.541879	0.427149	0.592084	0.813257	0.555212	0.167245	0.38601	0.285871	0.893738	0.511684	0.221225	0.4288	0.579257	0.46066	0.817936	0.520857	0.444396	-0.361712	0.325105	0.754774	0.556037	0.541593	0.310838	0.173815	1.0163	0.52569	-0.132622	0.00575673	0.0406995	0.413912	0.401238	0.368986	0.388022	0.452322	0.499987	0.0459957	0.63545	0.278889	0.556107	0.610177	0.232098
A5D8V6	VPS37C	0.503687	0.241685	-0.589785	-0.0219382	0.218781	0.352509	0.250291	-0.695635	-0.206948	0.578739	0.120903	0.39852	0.106698	0.251556	-0.00160097	-0.0825607	0.330054	0.229006	-0.159722	0.526132	0.812588	0.427539	0.192783	0.0595925	0.243145	-0.00482918	0.251688	0.510677	0.395795	0.254817	0.116837	0.158334	0.393503	0.304969	0.315763	0.223666	0.512505	-0.0700925	-0.170714	0.168398	0.0985182	0.203397	-0.0868238	0.338692	0.288992	0.130891	0.217248	-0.0325909
A5YKK6	CNOT1	-0.184054	0.0769979	-0.0900793	0.238876	0.0244092	0.172467	0.162784	-0.3361	-0.0747617	-0.014719	-0.115926	-0.0154392	-0.272972	-0.453966	-0.331308	0.0255701	-0.130902	-0.0452878	0.12218	0.0813241	-0.12307	-0.205042	-0.137942	0.0945857	-0.0363103	0.134346	-0.434297	-0.494098	-0.586725	-0.0103241	-0.0719698	0.124835	-0.0899709	-0.290715	-0.388611	-0.292055	-0.260433	-0.294532	-0.111335	-0.379765	0.0846052	-0.327052	-0.166354	-0.454802	-0.317671	0.0885331	-0.105507	0.181625
A6NDG6	PGP	-0.000623673	0.192024	0.141202	-0.00658475	-0.350722	-0.0126732	0.025987	0.0351566	-0.387903	-0.234284	-0.198775	-0.144662	0.15151	-0.459584	-0.179057	-0.137823	-0.303725	0.132554	-0.00149291	-0.107526	-0.0213653	0.0936247	-0.301456	-0.110444	0.189654	0.256108	-0.122686	0.204162	-0.0429756	0.227069	-0.489488	0.124835	-0.103251	0.121128	-0.0473234	0.419961	-0.160428	-0.352617	-0.40705	-0.321503	0.027573	-0.107463	-0.174189	-0.073015	-0.0835801	0.222421	0.100932	0.0935137
A6NDU8	C5orf51	0.389394	0.177503	0.378624	0.0592606	-0.0721662	-0.0722391	-0.0722065	-0.0726154	-0.0718019	-0.0710434	-0.072789	-0.0713537	-0.0705533	-0.0704325	-0.0710548	-0.0713588	-0.0713768	-0.0722234	-0.0711924	-0.0705648	-0.0705155	-0.0709777	-0.0720632	-0.072483	-0.0735226	-0.0722858	-0.0666033	-0.0683238	-0.0740938	-0.0712652	-0.0701293	-0.0708997	-0.0700396	-0.0667255	-0.0654228	-0.0757322	-0.0653662	-0.0710484	-0.072427	-0.0696482	-0.0732392	-0.0716616	-0.0720372	-0.0713852	-0.0714106	-0.0723681	-0.0719338	-0.0427723
A6NHQ2	FBLL1	0.132898	-0.13042	0.206225	0.26108	0.322328	0.467087	0.585674	0.412996	0.232025	0.221444	0.190126	0.0462306	0.191268	0.250494	0.236934	0.105286	0.244293	0.140682	0.138362	0.314066	0.379352	0.36324	-0.026679	0.196457	-0.47848	-0.146846	0.505633	0.207187	0.16642	-0.0910842	0.160623	-0.188029	-0.0188284	0.230713	0.52055	-0.383377	0.392848	0.276626	0.586528	0.454843	0.144579	0.233174	0.318251	0.389561	0.450514	0.0941329	0.521402	-0.182803
A6NHR9	SMCHD1	-0.071341	-0.0714452	-0.0705412	-0.0720964	0.0432902	-0.0539219	0.0879172	0.380774	-0.216793	-0.222387	-0.0738255	-0.0870504	-0.13641	-0.0473458	-0.0492914	-0.109847	-0.00139147	-0.125294	-0.0423357	-0.014756	0.2026	0.0595893	0.0981559	-0.0080653	0.0999051	0.146514	-0.0937653	-0.0472361	0.182519	0.149101	0.0255808	0.14641	0.0177598	0.104842	0.0578196	0.187971	0.133053	-0.217549	0.195816	0.0137112	-0.00429855	-0.00496746	0.32426	-0.221347	-0.199214	0.0818165	-0.125723	-0.070381
A8MSI8	LYRM9	-0.071341	-0.0714452	-0.0705412	-0.0720964	-0.0721662	-0.0722391	-0.0722065	-0.0726154	-0.0718019	-0.0710434	-0.072789	-0.0713537	-0.0705533	-0.0704325	-0.0710548	-0.0713588	-0.0713768	-0.0722234	-0.0711924	-0.0705648	-0.0705155	-0.0709777	-0.0720632	-0.072483	-0.0735226	-0.0722858	-0.0666033	-0.0683238	-0.0740938	-0.0712652	-0.0701293	-0.0708997	-0.0700396	-0.0667255	-0.0654228	-0.0757322	-0.0653662	-0.0710484	-0.072427	-0.0696482	-0.0732392	-0.0716616	-0.0462305	-0.0713852	-0.0714106	-0.0723681	-0.0719338	-0.070381
A8MTJ3	GNAT3	-0.282923	-0.18283	-0.389427	-0.244788	-0.551928	-0.474554	-0.647197	-0.306456	-0.423854	-0.18987	-0.399629	0.0316239	0.0197743	0.00842188	-0.0689839	-1.65768	-1.35978	-1.46556	-1.581	-0.184468	-0.223071	0.160737	-0.515148	-0.463621	-0.399035	-0.623575	-0.371808	-0.433742	-0.156539	-0.27449	-0.263702	-0.263639	-0.445596	-0.301461	-0.198448	-0.622218	-0.111864	-0.375507	-0.112989	-0.0382229	-0.225952	-0.186045	0.114898	-0.235551	-0.526064	-0.429576	-0.472737	-0.0612091
A8MWD9	SNRPGP15	0.108273	0.0540076	-0.0938831	0.15585	0.0329685	-0.112579	-0.0472117	0.314921	0.250769	0.202659	0.250769	0.091322	-0.173315	0.0140303	-0.199715	-0.442856	-0.193325	-0.463687	-0.440342	-0.286045	-0.0149174	-0.22336	-0.532663	-0.538295	-0.887155	-0.452214	-0.255735	-0.128636	-0.103879	-0.10986	-0.0556853	-0.171496	-0.108466	-0.0809627	-0.0124696	-0.187943	-0.149177	-0.3982	-0.391728	0.409052	0.436301	0.119572	-0.294785	-0.395929	-0.0681766	-0.0838586	-0.055658	0.154271
A8MXV4	NUDT19	-0.071341	-0.0714452	-0.0705412	-0.0720964	-0.0721662	-0.0722391	-0.0722065	-0.0726154	-0.0718019	-0.0710434	-0.072789	-0.0713537	-0.0705533	-0.0704325	-0.0710548	-0.0713588	-0.0713768	-0.0722234	-0.0711924	-0.0705648	-0.0705155	-0.0709777	-0.0720632	-0.072483	-0.0735226	-0.0722858	-0.0666033	-0.0683238	-0.0740938	-0.0712652	-0.0701293	-0.0708997	-0.0700396	-0.0667255	-0.0654228	-0.0757322	-0.0653662	-0.0710484	-0.072427	-0.0696482	-0.0732392	-0.0716616	-0.205237	-0.0713852	-0.0714106	-0.0723681	-0.0719338	-0.070381
B5ME19	EIF3CL	0.154576	0.0918838	0.292677	0.0544786	0.31169	0.294951	0.196187	-0.328435	0.247078	0.0687183	0.29383	0.0254589	0.444822	0.281867	0.434051	0.492228	0.507453	0.34393	0.350859	0.37161	0.368532	0.268768	0.414308	0.257184	-0.230612	0.093639	0.449694	0.458382	0.250439	0.0743838	0.276916	0.291126	0.447111	0.275458	0.3451	-0.245276	0.0138601	0.255871	0.0931833	0.299452	0.0258294	0.144873	0.466917	0.0673365	0.263316	0.00686682	0.159195	0.142652
B9A064	IGLL5	-1.46695	-1.60934	-0.238343	-1.56492	-1.77729	-1.62134	-1.18881	-2.05353	-1.38562	-0.88176	-1.36025	-1.76163	-1.70357	-1.62289	-1.75233	-1.99103	-1.48472	-1.77853	-1.91487	-1.54656	-1.52757	-1.64429	-1.7433	-1.80375	-1.80245	-1.80332	-1.66967	-1.6884	-1.29686	-1.61493	-1.62581	-1.17528	-1.57093	-1.96283	-1.47552	-1.87451	-1.5967	-1.64424	-1.79934	-1.38817	-1.86538	-2.07342	-2.17731	-1.86868	-1.26717	-1.2751	-1.31083	-1.51816
E9PAV3	NACA	0.690861	0.24322	0.714691	0.28887	0.579278	0.656328	0.639165	0.0669663	0.514648	0.276585	0.322988	-0.0740356	0.659219	0.283052	0.490688	0.293329	0.513321	0.365165	0.01967	0.341019	0.339431	-0.0215088	0.461405	0.492274	0.070716	0.266964	0.371982	0.356049	0.147777	0.204694	0.333172	0.211226	0.504334	0.727775	0.556465	0.0966558	0.45179	0.329964	0.0281459	1.23145	0.284174	0.541917	0.870407	0.375167	0.59704	-0.0426931	-0.203239	0.301466
E9PQ53	NDUFC2-KCTD14	-0.071341	-0.0714452	-0.0705412	-0.0720964	-0.0721662	-0.0722391	-0.0722065	-0.0726154	-0.0718019	-0.0710434	-0.072789	-0.0713537	-0.0705533	-0.0704325	-0.0710548	-0.0713588	-0.0713768	-0.0722234	-0.0711924	-0.0705648	-0.0705155	-0.0709777	-0.0720632	-0.072483	-0.0735226	-0.0722858	-0.0666033	-0.0683238	-0.0740938	-0.0712652	-0.0701293	-0.0708997	-0.0700396	-0.0667255	-0.0654228	-0.0757322	-0.0653662	-0.0710484	-0.072427	-0.0696482	-0.0732392	-0.0716616	-0.0720372	-0.0713852	-0.0714106	-0.0723681	-0.0719338	-0.070381
E9PRG8	C11orf98	-0.071341	-0.0714452	-0.0705412	-0.0720964	-0.0721662	-0.0722391	-0.0722065	-0.0726154	-0.0718019	-0.0710434	-0.072789	-0.0713537	-0.0705533	-0.0704325	-0.0710548	-0.0713588	-0.0713768	-0.0722234	-0.0711924	0.351494	0.298017	0.0342767	-0.0720632	-0.072483	-0.0735226	-0.0722858	-0.0666033	-0.0683238	-0.0740938	-0.0712652	-0.0701293	-0.0708997	-0.0700396	-0.0667255	-0.0654228	-0.0757322	-0.0653662	-0.0710484	-0.072427	-0.0696482	-0.0732392	-0.0716616	-0.0720372	-0.0713852	-0.0714106	-0.0723681	-0.0719338	-0.070381
L0R6Q1	SLC35A4	-0.434057	-0.340604	0.113599	-0.471149	-0.146178	-0.0852366	0.0361548	0.0612759	-0.516163	-0.263613	-0.469924	-0.31781	0.0441731	-0.0267314	-0.0458195	-0.345527	-0.189143	-0.279917	-0.198999	-0.570471	-0.412985	-0.302301	-0.213307	-0.17735	0.0676621	-0.180092	-0.213483	-0.212364	-0.117645	-0.57419	-0.657071	-0.571275	-0.735213	-0.413392	-0.350566	0.0206138	-0.205347	-0.745148	-0.586196	0.0607688	0.0607469	-0.0694569	0.168078	-0.263374	-0.454901	-0.176659	-0.0800869	-0.149738
O00115	DNASE2	-0.05067	0.0778791	-0.184193	0.217659	0.636128	-0.122951	0.462221	1.13567	-0.190342	0.349275	-0.243765	0.902207	0.0570932	0.0372139	-0.270743	0.742216	0.446734	0.67793	0.767366	0.187299	0.0690437	0.0612798	0.0310384	-0.237608	0.121749	0.47879	0.391963	-0.0232026	0.37425	0.0902776	-0.343334	0.637566	-0.00728623	-0.0566081	-0.018221	0.16143	0.273354	-0.323751	0.593462	0.035159	0.479218	-0.0162481	-0.193038	0.553764	0.416235	0.592296	1.42077	0.356047
O00116	AGPS	-0.119708	-0.37028	-0.205527	-0.334541	-0.323229	-0.248473	-0.192351	-0.160327	-0.19212	0.173051	-0.293716	0.282442	-0.210859	-0.244034	-0.358303	-0.324911	-0.293372	-0.316432	-0.200459	-0.289649	-0.220091	-0.039005	-0.289065	-0.268473	-0.200218	0.121259	-0.0192723	-0.175217	-0.191541	0.0175116	-0.159553	-0.150009	-0.306037	-0.179018	-0.0994053	-0.119902	-0.184972	-0.421045	-0.245691	-0.368728	-0.124666	-0.349529	-0.485439	0.0080304	-0.119254	-0.231946	-0.279779	-0.151676
O00148	DDX39A	0.181923	-0.340604	-0.0209174	0.201958	0.135592	0.0693504	-0.512779	0.267025	-0.150575	0.00675603	-0.288461	0.188881	-0.0812386	-0.115134	-0.281268	-0.0767315	0.0588562	0.0657796	0.196344	0.114671	0.217886	-0.338521	-0.358818	0.170048	0.249116	0.687085	-0.0883707	-0.118194	0.499395	0.326391	-0.186896	-0.0383688	-0.235744	-0.220986	-0.00929511	-0.153449	-0.120667	0.0170656	0.245971	-0.310741	0.923978	0.0386589	-0.0194458	1.32524	-0.112615	0.292001	-0.40474	0.0853481
O00151	PDLIM1	0.125269	0.266667	0.162297	0.179196	0.0611767	-0.0138048	0.122574	0.505702	0.0514986	0.117868	0.103142	0.184107	-0.328311	0.0501551	-0.123185	0.376609	0.19255	0.233637	0.289654	-0.0120578	0.0576208	-0.275077	0.0807964	-0.205116	-0.122717	-0.378678	0.198373	0.209441	0.144284	0.384253	-0.0350504	0.381708	0.122827	0.0998564	0.178084	0.0500172	0.0309228	0.00854923	0.225668	-0.189794	0.343445	-0.075493	0.147098	0.580225	0.128551	0.0904095	0.530856	-0.0117198
O00154	ACOT7	0.544103	0.526812	0.162636	0.182605	0.502212	0.299233	-0.119284	0.144877	0.368015	0.39704	0.207437	-0.138656	-0.199546	-0.186879	-0.114797	-0.137823	0.156718	0.292384	0.193777	0.450217	-0.170176	0.349529	0.526283	0.547402	-0.0591805	-0.389375	0.577438	0.0186297	0.232103	-0.224402	0.361917	0.162664	0.344309	0.173692	0.115822	0.469846	0.605624	0.220331	0.306158	0.206454	0.0382762	0.32669	0.141037	-0.0438373	0.621807	0.192796	0.00567267	0.596206
O00159	MYO1C	0.05286	0.0703265	-0.0762111	0.0475219	0.660728	-0.168779	0.150756	-0.115292	0.100057	-0.270997	0.329973	0.106152	0.0441731	0.555065	0.586222	0.0884741	0.142003	-0.289101	0.738345	-0.129609	0.181645	0.176063	0.368784	0.149145	-0.206322	-0.145742	0.0288844	0.527029	-0.306577	0.290917	0.186048	0.293602	-0.00963029	-0.0593126	0.103913	-0.651757	0.381193	0.050918	0.138405	-0.299628	-0.101855	-0.0354788	-0.245542	0.446849	-0.0885938	0.140884	-0.05875	0.116657
O00160	MYO1F	0.183411	0.61123	-0.27492	0.163449	-0.382593	-0.302418	-0.292254	0.544169	0.0869224	0.24993	0.196965	0.542873	-0.522373	-0.242647	-0.265055	-0.196563	0.0465257	0.0156329	-0.0299706	-0.0659533	-0.054877	0.546569	-0.64183	-0.508936	0.0842998	-0.159387	-0.3215	-0.25868	0.685939	0.12694	-0.193909	0.134031	-0.0879833	0.145784	0.127723	0.19169	0.131555	-0.627275	-0.0259467	-0.347099	0.772676	-0.333087	-0.602686	0.143112	0.128551	0.0904095	0.530856	-0.0129155
O00161	SNAP23	0.00784142	-0.108099	-0.102024	-0.246234	-0.273961	-0.0363481	-0.105803	-0.157828	0.178414	-0.382145	0.34416	0.032697	-0.121721	-0.0783293	-0.178895	-0.12307	-0.0894407	-0.244353	-0.194509	0.228921	0.196528	0.029019	0.0364318	-0.153834	-0.0665406	-0.138889	-0.00627368	-0.0253609	-0.0912541	-0.15693	-0.179643	-0.120471	-0.132273	-0.225978	-0.0454191	-0.396647	-0.142965	-0.0411854	-0.0967648	-0.276559	-0.0461661	-0.0512589	-0.109712	-0.552872	-0.390626	-0.368803	-0.437381	-0.293453
O00165	HAX1	-0.071341	-0.0714452	-0.0705412	-0.0720964	-0.0721662	-0.0722391	-0.0722065	-0.0726154	-0.0718019	-0.0710434	-0.072789	-0.0713537	-0.0705533	-0.0704325	-0.0710548	-0.0713588	-0.0713768	-0.0722234	-0.0711924	-0.0705648	-0.0705155	-0.0709777	-0.0720632	-0.072483	-0.0735226	-0.0722858	-0.0666033	-0.0683238	-0.0740938	-0.0712652	-0.0701293	-0.0708997	-0.0700396	0.113236	0.089476	-0.117714	0.0943411	-0.0710484	-0.072427	-0.0696482	-0.0732392	-0.0716616	-0.0720372	-0.0713852	-0.0714106	-0.0723681	-0.0719338	-0.070381
O00170	AIP	-0.344508	-0.384739	-0.767698	-0.322662	-0.110883	-0.135618	0.171888	-0.102136	-0.395674	-0.127074	-0.400302	-0.0848244	-0.428316	-0.627077	-0.569654	-0.751184	-0.562077	-0.723813	-0.822194	-0.733155	-0.4554	-0.110563	-0.411505	-0.403475	-0.25413	-0.282563	0.52656	-0.221709	0.186926	0.0175116	-0.159553	-0.150009	-0.306037	0.126905	-0.118288	0.179029	0.0287692	-0.175281	-0.0747081	0.35604	0.247097	0.256993	-0.3286	0.309169	-0.0227225	0.0490357	0.117083	-0.433446
O00178	GTPBP1	-0.335398	-0.350311	-0.203391	-0.270891	0.199259	-0.135002	0.234685	0.134709	-0.227389	-0.167288	-0.237	-0.546058	-0.112676	-0.224401	-0.111199	-0.255335	-0.288966	-0.255211	0.0272477	-0.102179	-0.0585416	0.0342767	0.276659	0.077809	-0.320456	0.507293	0.0505643	-0.0735349	0.257366	-0.257642	0.115044	-0.0505898	-0.0542515	0.0219644	-0.014388	0.293502	0.0264424	-0.258613	-0.367829	0.212866	0.0664705	-0.0241384	0.0794052	-0.2458	-0.0714106	-0.0723681	-0.0719338	-0.104022
O00186	STXBP3	0.175363	0.167029	-0.0274323	0.038779	-0.0691802	-0.0275604	0.177146	-0.218448	0.00259525	-0.16109	-0.143534	-0.0689194	-0.0952522	0.138549	0.326846	0.102164	0.289635	0.103737	-0.0530909	-0.0174948	-0.0370647	0.201403	-0.104005	-0.263871	0.0653849	-0.259033	-0.00953061	-0.103207	-0.171335	0.0986538	0.135596	0.014925	0.0499011	0.0560166	0.0763355	-0.231224	0.238547	0.190868	0.219804	0.280503	0.0405994	0.0402797	-0.0139682	-0.0504954	0.464627	-0.0376849	0.22161	0.205312
O00193	SMAP	0.189213	0.281621	0.196087	-0.153888	0.715019	0.0956973	-0.12071	-0.586354	0.614885	0.282	0.644265	-0.183147	0.571557	0.920498	0.627486	0.131979	0.342714	0.0257088	-0.0568813	0.481284	0.589584	-0.539964	0.893645	0.714496	0.129461	-0.204797	0.467387	0.544547	-0.0200268	0.790438	0.639553	-0.423239	0.420405	0.392675	0.267668	0.365867	0.797376	0.9511	-0.243894	0.541607	0.0817648	0.21638	0.632142	0.6143	0.871902	-0.107901	0.269322	0.00167173
O00203	AP3B1	-0.0979312	0.0605779	0.109054	0.148444	-0.0306134	-0.0465027	0.136108	-0.399132	0.034975	0.286618	0.272667	0.372898	-0.0601219	-0.212649	-0.0765616	0.0849426	0.12895	0.224462	0.0913232	0.0493522	-0.0604253	0.179342	0.207173	0.302454	0.102133	0.382663	0.316524	0.110967	0.262916	0.0902776	0.0656771	0.345087	0.0700766	0.0993576	-0.024185	-0.122749	0.201888	0.409247	0.184599	0.198681	0.260147	0.198656	0.215655	0.118942	0.198785	0.380323	0.207775	0.256195
O00217	NDUFS8	-0.326048	-0.511166	-0.228196	-0.492357	-0.785403	-0.33542	-0.0581013	-0.570483	0.15916	-0.571968	-0.238375	-0.639279	0.601683	0.432406	0.0695251	0.131604	0.0411545	0.158888	0.0647525	0.417044	-0.0737774	0.0374917	0.030607	-0.170604	-0.175727	0.163485	0.207675	-0.472181	-0.366927	0.359069	0.797158	0.106798	0.412744	0.402245	0.0277694	-0.763472	-0.573083	0.0882736	-0.135514	0.0218107	-0.051918	0.391099	0.42806	0.0331254	0.196179	-0.296538	0.013509	-0.026428
O00221	NFKBIE	-0.071341	-0.0714452	-0.0705412	-0.0720964	-0.0721662	-0.0722391	-0.0722065	-0.0726154	-0.0718019	-0.0710434	-0.072789	-0.0713537	-0.0705533	-0.0704325	-0.0710548	-0.0713588	-0.0713768	-0.108125	-0.227232	-0.0705648	-0.0705155	-0.0709777	-0.0720632	-0.072483	-0.0735226	-0.0722858	-0.0666033	-0.0683238	-0.0740938	-0.0712652	-0.0701293	-0.0708997	-0.0700396	-0.0667255	-0.0654228	-0.0757322	-0.0653662	-0.0710484	-0.072427	-0.0696482	-0.0732392	-0.0716616	-0.0720372	-0.0713852	-0.0714106	-0.0723681	-0.0719338	-0.070381
O00231	PSMD11	0.00543157	-0.0776851	-0.222421	-0.0139956	0.104599	0.176916	0.212918	-0.283837	0.0489009	0.159731	0.137144	0.0280639	0.0941224	-0.0250554	-0.015674	0.184164	0.260909	-0.0941784	0.0140241	0.0100957	0.0838886	0.0548269	0.145634	0.101668	-0.438879	-0.151011	0.157987	0.292384	0.0768013	-0.0339746	0.0623774	0.0880343	0.0761201	0.126237	0.121049	0.179136	0.177538	0.0443201	-0.144251	0.108802	-0.260787	-0.0461093	0.164553	-0.0787897	-0.0307335	-0.218989	-0.0875738	0.0908463
O00232	PSMD12	0.185113	0.0856442	0.0551572	0.0996258	0.163822	0.215127	0.0588615	-0.0180793	0.022108	0.152987	0.139578	0.185656	0.285346	0.173713	0.202753	0.23838	0.239148	0.011877	0.0640776	0.0265219	-0.0249822	0.0512382	0.282113	0.26312	-0.159247	0.0442225	0.260938	0.403818	0.247415	0.0479538	0.178147	0.212221	0.17921	0.153917	0.0954957	0.182824	0.130374	0.235242	0.00252117	0.230301	-0.0954542	0.0864451	0.351177	-0.098737	0.293483	0.0766676	-0.04271	0.18623
O00244	ATOX1	-0.356387	0.219515	0.0331994	-0.254394	0.199259	0.267913	0.367545	-0.762244	0.260249	-0.00340181	0.729003	-0.789181	0.377206	-0.194758	0.378768	-0.0625916	0.113297	-0.119431	-0.432699	-0.0705648	-0.0705155	-0.0709777	0.291018	0.0396793	0.0439328	-0.112381	-0.427741	-0.321705	-0.175158	-0.370155	0.685284	-0.244644	0.619909	0.590958	0.574531	0.0338245	0.120539	-0.289279	-0.327478	-0.484599	-0.0975599	-0.201329	-0.0420978	-0.418669	-0.201299	-0.255277	-0.433089	0.0374833
O00264	PGRMC1	-0.0349715	0.321681	0.32223	-0.0550699	-0.596185	-0.70121	-0.597503	0.100286	-0.542461	0.00100568	-0.420861	0.432114	-0.0705533	-0.398523	0.149638	-0.300965	-0.379646	-0.40993	0.337032	-0.40751	-0.370278	0.0534698	-0.245241	-0.790946	-1.82405	-0.190135	-0.299918	-0.436307	-0.652422	-0.30844	-0.0308488	-0.390579	-0.169402	-0.0352783	-0.559324	0.128765	-0.273765	-0.307282	-0.103814	-0.0298859	-0.237782	0.459704	-0.348194	0.0874703	0.611126	0.0977213	0.214626	0.396911
O00267	SUPT5H	0.709296	0.293775	0.540104	-0.608111	0.142001	0.121303	0.424468	0.108312	-0.0670975	0.00397598	-0.0408175	-0.240927	0.329236	0.378818	0.303795	-0.0933347	-0.0476747	-0.129425	-0.106741	0.0380278	0.284562	0.0121317	0.288851	0.158972	-0.29612	0.152939	-0.107661	-0.0594219	0.105876	0.023386	0.167065	0.0446404	0.22728	-0.0307722	-0.0823017	-0.304275	0.127652	0.24435	0.0142696	0.0162043	-0.0863049	-0.0694569	-0.128018	0.00712431	-0.337592	-0.698794	-0.646007	-0.729817
O00273	DFFA	0.063716	-0.0904081	-0.0677566	-0.00887753	0.715745	0.533357	0.383885	0.127129	0.367359	0.0424316	0.503474	-0.837487	0.226984	-0.0521027	0.000148328	0.251986	0.0667431	0.0573212	-0.173037	0.438827	0.476242	-0.218178	0.0659888	0.0479707	0.274138	-0.147943	0.269942	0.68357	0.0694819	-0.352676	-0.205572	0.0612643	0.018952	0.151665	0.378557	-0.0086766	0.269104	0.335423	0.000454647	-0.0696482	-0.0732392	-0.0716616	0.364028	-0.0223801	-0.130122	-0.191763	-0.0327123	-0.265248
O00291	HIP1	-0.264212	-0.188347	-0.130564	-0.149309	-0.279088	-0.357897	-0.0828406	-0.473471	-0.0718019	-0.0710434	-0.072789	-0.0713537	-0.699123	-0.702776	-0.594712	0.271456	0.281589	0.311627	0.173962	-0.491954	-0.408885	-0.0606644	-0.323147	-0.0390581	-0.169068	-0.021015	-0.26774	-0.201732	-0.15676	-0.125161	-0.584202	-0.405616	-0.460419	-0.395724	-0.266998	-0.112075	-0.226037	-0.160972	-0.0868985	0.764613	0.705631	1.5166	-0.109404	-0.19084	-0.0714106	-0.0723681	-0.0719338	-0.134953
O00299	CLIC1	-0.143928	-0.265249	0.507359	-0.0847523	-0.0880304	-0.0796728	0.0917248	0.0197872	0.506376	-0.257665	0.101543	-0.153771	0.392032	-0.0115596	0.685297	0.0779165	-0.0541192	0.24269	0.238373	-0.0535404	0.257288	0.346959	0.526283	0.113749	0.101013	0.298035	-0.0939201	0.12376	0.430997	-0.0932639	0.373351	0.176957	0.549383	0.585619	0.786394	-0.0546942	0.061805	0.190868	-0.227871	0.233552	0.0664705	0.515489	0.390312	-0.0342792	0.0386534	-0.0470386	-0.230747	-0.0541837
O00303	EIF3F	0.696784	0.659185	0.746349	0.501947	0.0517919	0.629939	0.401536	0.265427	0.53608	0.345901	0.445501	0.536869	0.673174	0.500001	0.714147	0.628022	0.547624	0.452736	0.732969	0.473145	0.392166	0.354257	0.52338	0.506339	0.176112	0.412534	0.253152	0.336619	0.146849	0.349491	0.436012	0.70877	0.545687	0.397397	0.410732	0.121049	0.215952	0.207426	0.348567	-0.179624	0.309864	0.330557	0.425115	0.702054	0.11124	0.719052	0.551997	0.630637
O00329	PIK3CD	-0.071341	-0.0714452	-0.0705412	-0.0720964	-0.0721662	-0.0722391	-0.0722065	-0.0726154	-0.0718019	-0.0710434	-0.072789	-0.0713537	-0.0705533	-0.0704325	-0.0710548	-0.0713588	-0.0713768	-0.0722234	-0.0711924	-0.0705648	-0.0705155	-0.0709777	-0.0720632	-0.072483	-0.0735226	-0.0722858	0.0715289	-0.109094	0.529816	-0.0712652	-0.0701293	-0.0708997	-0.0700396	-0.0667255	-0.0654228	-0.0757322	-0.0653662	-0.0710484	-0.072427	-0.0696482	-0.0732392	-0.0716616	-0.0720372	-0.0713852	-0.0714106	-0.0723681	-0.0719338	-0.070381
O00330	PDHX	-0.071341	-0.0714452	-0.0705412	-0.0720964	-1.63326	-0.951345	-1.58205	-1.87122	0.324892	0.113927	0.241799	-0.239654	0.185605	0.321248	0.15112	-0.40756	-0.320659	-0.439846	-0.515632	-0.174098	-0.0775803	-0.294566	-0.156285	0.168237	-0.103449	-0.288411	-0.303321	-0.250021	-0.180838	-0.0896719	-0.223004	-0.0580923	-0.189895	-0.239242	-0.196202	-0.584427	-0.306217	-0.241083	-0.125576	-0.0464382	-0.4761	-0.230439	0.141037	-0.443143	-0.579013	-0.747442	-0.420042	-0.070381
O00338	SULT1C2	-0.191842	0.478407	0.45414	-0.138646	0.229541	0.00612992	0.247965	0.275575	-0.201968	-0.188871	-0.150048	-0.00487491	0.220658	-0.00237656	-0.0905378	-0.015433	0.109052	0.0970091	0.0918186	-0.350623	-0.255204	-0.158076	0.381328	-0.137425	0.242089	0.867182	-0.436954	0.414099	-0.117676	0.145489	0.161358	0.101811	0.103317	-0.0686733	-0.465512	-0.435328	0.918158	-0.0998725	0.195842	-0.110143	0.213661	0.267462	0.113044	0.164936	0.692957	0.222421	0.320586	0.387488
O00339	MATN2	-0.071341	-0.0714452	-0.0705412	-0.0720964	0.618999	-0.329172	0.210909	0.265427	-0.0718019	-0.0710434	-0.072789	-0.0713537	-0.0705533	-0.0704325	-0.0710548	-0.0713588	-0.0713768	-0.0722234	-0.0711924	-0.0705648	-0.0705155	-0.0709777	-0.0720632	-0.072483	-0.0735226	-0.0722858	-0.0666033	-0.0683238	-0.0740938	-0.0712652	-0.0701293	-0.0708997	-0.0700396	-0.0667255	-0.0654228	-0.0757322	-0.0653662	-0.0710484	-0.072427	-0.0696482	-0.0732392	-0.0716616	-0.0720372	-0.0713852	-0.0714106	-0.0723681	-0.0719338	-0.070381
O00401	WASL	-0.071341	-0.0714452	-0.0705412	-0.0720964	-0.0721662	-0.0722391	-0.0722065	-0.0726154	-0.0718019	-0.0710434	-0.072789	-0.0713537	-0.0705533	-0.0704325	-0.0710548	-0.0713588	-0.0713768	-0.0722234	-0.0711924	-0.0705648	-0.0705155	-0.0709777	-0.0720632	-0.072483	-0.0735226	-0.0722858	-0.200091	0.132925	-0.309451	-0.0712652	-0.0701293	-0.0708997	-0.0700396	-0.0667255	-0.0654228	-0.0757322	-0.0653662	-0.0710484	-0.072427	-0.0696482	-0.0732392	-0.0716616	-0.0720372	-0.0713852	-0.0714106	-0.0723681	-0.0719338	-0.070381
O00410	IPO5	-0.179789	-0.0632903	0.0487115	0.00644231	0.0793496	0.132166	-0.0908393	-0.140143	0.0639509	0.0710848	0.0302395	0.0165912	-0.0135491	0.00616675	-0.0684068	0.11872	-0.0445617	0.0573212	0.132802	0.13845	0.0452866	-0.034459	0.0315963	0.182126	0.0585156	0.0585994	0.0605455	0.0992229	-0.258342	0.011196	0.146929	0.0325335	0.0776274	0.158165	-0.0207376	0.157976	-0.107958	-0.0529841	0.0830478	0.0299795	0.0498572	0.0909305	0.18989	0.08842	0.098037	-0.073778	0.218603	0.0803397
O00422	SAP18	0.193691	0.203388	-0.000466349	0.144507	0.137717	0.109848	0.14943	-0.0304338	-0.611073	-0.744894	-0.55186	-0.67605	0.0813961	0.105469	0.153022	0.10326	0.117423	-0.0745889	0.0534283	0.211075	0.328637	0.149029	0.128181	0.141177	0.500198	0.32795	-0.533601	0.170869	-0.524055	0.295153	0.224189	0.188442	0.257101	0.0133927	0.055617	0.358959	0.188431	0.215536	0.378665	-0.0373758	-0.0395484	-0.245694	-0.497988	-0.179983	0.215312	0.181251	0.20204	-0.100447
O00425	IGF2BP3	-0.071341	-0.0714452	-0.0705412	-0.0720964	-0.0721662	-0.0722391	-0.0722065	-0.0726154	-0.0718019	-0.0710434	-0.072789	-0.0713537	-0.0705533	-0.0704325	-0.0710548	-0.191207	-0.00473272	-0.300248	-0.189066	-0.0705648	-0.0705155	-0.0709777	-0.0720632	-0.072483	-0.0735226	-0.0722858	-0.0666033	-0.0683238	-0.0740938	-0.0712652	-0.0701293	-0.0708997	-0.0700396	-0.0667255	-0.0654228	-0.0757322	-0.0653662	-0.0710484	-0.072427	-0.0696482	-0.0732392	-0.0716616	-0.0720372	-0.0713852	-0.0714106	-0.0723681	-0.0719338	-0.070381
O00429	DNM1L	-0.00359409	0.0128806	-0.00362521	0.0270267	0.110729	0.130049	-0.0437856	-0.265883	-0.0931188	-0.066521	0.00842949	-0.101283	0.165721	0.293038	0.102176	-0.0961303	-0.229949	0.0470323	-0.147259	-0.271858	0.0220904	-0.634036	-0.0680865	0.251745	0.260351	0.179673	-0.160441	-0.00863267	0.0541183	0.244948	0.344448	-0.0206067	0.0675926	-0.170312	-0.0323473	-0.131151	-0.154626	-0.141906	-0.114882	0.000342437	-0.0052583	-0.131684	0.0414074	0.149842	-0.267181	-0.558529	-0.344715	0.256673
O00442	RTCA	-0.162015	-0.203002	0.0737607	0.0839326	-0.459536	-0.067883	-0.265232	0.111939	0.0616232	0.210805	-0.0901501	-0.100196	0.00726858	-0.0292791	0.0764748	0.00130644	-0.141824	-0.0339277	-0.244885	-0.0489157	0.063645	0.184381	-0.425874	-0.300669	0.0266745	0.0559536	-0.266977	-0.431368	-0.0860674	-0.4207	-0.114884	-0.388965	-0.190388	0.128271	0.0405312	0.362564	-0.128622	-0.153952	0.125437	-0.115312	-0.0732698	-0.0928527	-0.134669	-0.277223	0.0010468	0.249654	0.128861	-0.00205787
O00443	PIK3C2A	-0.071341	-0.0714452	-0.0705412	-0.0720964	0.155781	0.0158034	0.273099	0.0619733	0.316672	0.0616327	0.292628	-0.161518	0.149228	0.119528	0.0249915	-0.0215962	0.0910592	0.101802	0.142551	0.116256	0.155052	-0.0760769	-0.111341	-0.0145445	0.246399	0.107036	-0.0313217	-0.0383049	-0.163441	0.205867	-0.182728	0.186807	-0.11575	0.159299	0.00711204	0.559579	0.372493	-0.0906836	0.558689	0.223282	0.206522	0.0667861	-0.0820949	0.417321	-0.181517	0.249654	0.205193	-0.070381
O00468	AGRN	-0.303505	-0.414603	-0.643744	-0.341823	-0.498159	-0.731233	-1.00432	-0.126786	-0.622935	-0.770575	-0.743586	-0.415951	-0.487375	0.167346	-0.0669473	-0.672636	-0.731174	-0.67406	-0.681752	-0.309656	-0.729205	0.330492	-0.306687	-0.0861384	0.0368502	-0.267307	-0.22402	-0.383455	-0.36987	-0.79782	-0.551246	-1.01394	-0.79925	-0.615205	-0.0258504	-0.415854	-0.27106	-0.482577	-0.122288	-0.334168	0.0618364	-0.0308699	-0.663364	-0.346539	-0.205409	-0.137585	-0.183987	-0.341062
O00471	EXOC5	-0.105374	-0.0389682	-0.0469014	-0.0950892	0.237128	0.0758953	0.165778	-0.476337	-0.156216	-0.0157709	-0.0562748	-0.239654	-0.141534	-0.224401	-0.206404	-0.317315	0.0129162	-0.40993	-0.330545	-0.00741821	-0.486207	0.0365139	0.156941	0.19376	-0.013494	-0.24305	0.084076	-0.0663595	0.0181742	0.109977	0.271574	-0.198263	0.171519	-0.0482859	-0.264245	-0.179956	-0.00028013	-0.00696111	-0.176197	-0.156487	-0.665374	-0.241861	-0.242671	0.090084	0.289406	-0.431631	-0.306424	0.130624
O00478	BTN3A3	-0.15623	-0.0201084	-0.0890493	0.0666719	-0.0843707	-0.158269	-0.142558	0.3617	-0.103087	-0.0767545	-0.121952	0.0825208	-0.329815	-0.498577	-0.359782	-0.0560857	0.0351266	0.0253204	0.0852542	0.109443	-0.0410011	0.388939	-0.170763	-0.136481	-0.100476	-0.193265	-0.202432	-0.245879	0.458774	0.0690774	-0.05558	-0.171277	-0.204555	-0.143741	-0.174742	0.119335	-0.103693	-0.168307	0.0287219	-0.35035	0.0767617	-0.401565	-0.163619	-0.409124	0.0906472	0.372683	0.304922	0.115951
O00483	NDUFA4	-0.167688	0.352463	-0.053702	-0.0250558	0.304555	0.41059	0.125698	-0.252431	-0.183662	-0.391752	-0.0495561	-0.77346	0.38975	0.0427283	0.163073	-0.0120345	0.0643276	0.118317	0.304427	0.31041	0.47715	-0.72638	0.347089	0.372337	0.300473	0.201666	0.676713	0.44961	0.257366	0.275764	0.705096	0.321683	0.531263	0.398355	0.350084	0.196863	0.320885	0.323642	0.315708	-0.367152	-5.90782e-18	0.372532	0.720418	0.187629	0.141063	-0.115866	-0.375215	0.155746
O00487	PSMD14	0.110579	0.18627	0.14694	0.121785	0.228411	0.254399	0.262021	0.132059	0.236088	0.187529	0.331755	0.197403	0.246556	0.0962699	0.293015	0.217079	0.227075	0.120331	0.0454708	0.273173	0.253934	0.222171	0.348897	0.403656	-0.109976	0.262913	0.384357	0.500001	0.341608	0.229356	0.334379	0.453391	0.3833	0.211536	-0.149996	0.614793	0.539258	0.32479	0.00795963	0.0239917	0.219326	0.443757	0.421136	-0.0400712	-0.42111	-0.331606	-0.43954	0.230083
O00499	BIN1	-0.693019	-0.419253	-0.934385	-0.675693	-0.695312	-0.723419	-0.997341	-0.37414	-0.998946	-1.35342	-0.92212	-0.942859	-1.01443	-0.363055	-0.791764	-0.506347	-0.699142	-0.37288	-0.571978	-0.394603	-0.723465	0.0264997	-0.708065	-0.543598	-0.474553	-0.59236	-0.747067	-0.726002	-0.717	-0.791445	-0.51394	-0.736754	-0.75247	-0.554749	-0.689254	0.321805	-0.791882	-0.685427	-0.380299	-0.661615	-0.530519	-0.415326	-0.589032	-0.510665	-0.272143	-0.279152	-0.160301	-0.773738
O00505	KPNA3	-0.318204	-0.11067	-0.315343	-0.31116	0.000490986	0.0723876	0.210909	-0.581278	-0.733938	-0.813516	-0.698797	-0.654622	-0.508016	-0.751529	-0.647654	0.0544326	0.0779689	0.114831	0.130507	-0.199624	-0.307031	-0.371257	-0.361509	-0.322852	-0.445224	-0.197309	-0.497192	-0.506893	-0.444919	-0.497332	-0.357104	-0.753976	-0.073282	0.338546	0.0135642	-0.461425	-0.521405	-0.222848	-0.219595	0.0771679	-0.0551418	0.0483252	-0.0885383	-0.460347	-0.157035	0.0185235	-0.29629	-0.328309
O00533	CHL1	-0.362095	-0.158012	0.397718	-0.418901	-0.100104	0.00942752	-0.0589338	0.00187849	-0.135395	-0.150494	-0.0292464	-0.20554	-0.234564	-0.00316761	-0.183807	-0.190971	-0.124332	-0.195567	-0.27518	-0.221175	-0.229844	-0.166619	-0.143045	-0.240295	0.0685964	-0.121884	-0.503421	-1.07066	-1.19212	-0.0424841	-0.361409	-0.174897	-0.239897	-0.342568	-0.155349	-0.0736138	-0.224993	-0.0570567	-0.0274527	-0.299508	-0.0285164	-0.101411	-0.21429	-0.349237	-0.0956705	0.0784662	-0.125832	-0.141095
O00534	VWA5A	-0.071341	-0.0714452	-0.0705412	-0.0720964	-0.0721662	-0.0722391	-0.0722065	-0.0726154	-0.0718019	-0.0710434	-0.072789	-0.0713537	-0.0705533	-0.0704325	-0.0710548	-0.0713588	-0.0713768	-0.0722234	-0.0711924	-0.0705648	-0.0705155	-0.0709777	-0.0720632	-0.072483	-0.0735226	-0.0722858	-0.413929	-0.268159	-0.0149432	-0.0712652	-0.0701293	-0.0708997	-0.0700396	-0.0667255	-0.0654228	-0.0757322	-0.0653662	-0.0710484	-0.072427	-0.0696482	-0.0732392	-0.0716616	-0.0720372	-0.0713852	-0.0714106	-0.0723681	-0.0719338	-0.070381
O00541	PES1	0.19165	0.184747	0.260704	0.51468	0.377587	0.11721	0.358568	0.111939	0.323931	0.345377	0.324367	0.309513	0.5076	0.421492	0.492157	-0.65542	-0.837864	-0.145733	0.411797	0.280088	0.570881	0.145909	0.188847	0.53186	0.274138	0.422699	0.390802	0.376222	0.347776	0.372785	0.205358	0.392367	0.264273	0.166071	0.367413	0.3451	0.53411	0.330498	0.536107	0.542725	0.811478	0.533649	0.455171	0.931294	0.209281	0.368485	0.503802	0.26229
O00560	SDCBP	0.305884	-0.12336	0.263091	0.570469	-0.0429605	0.0158034	0.326903	0.188431	-0.0953655	0.413406	0.034596	0.89043	0.0707444	-0.111028	-0.0458195	0.559936	0.0498943	0.726923	0.112338	-0.223189	0.758347	0.0977089	0.0413461	-0.402251	0.356129	-0.169442	0.0332247	-0.144152	-0.216973	0.439453	-0.0578275	0.458493	0.193631	0.301458	0.64942	-0.209124	-0.150508	0.289222	0.616742	-0.143021	0.574409	0.0333826	0.220643	0.647525	0.276626	0.641329	1.14787	-0.156982
O00566	MPHOSPH10	-0.071341	-0.0714452	-0.0705412	-0.0720964	-0.0721662	-0.0722391	-0.0722065	-0.0726154	-0.0718019	-0.0710434	-0.072789	-0.0713537	-0.0705533	-0.0704325	-0.0710548	0.285979	0.265823	0.101562	0.144574	-0.0705648	-0.0705155	-0.0709777	-0.0720632	-0.072483	-0.0735226	-0.0722858	-0.0666033	-0.0683238	-0.0740938	-0.0712652	-0.0701293	-0.0708997	-0.0700396	-0.0667255	-0.0654228	-0.0757322	-0.0653662	-0.0710484	-0.072427	-0.0696482	-0.0732392	-0.0716616	-0.0720372	-0.0713852	-0.0714106	-0.0723681	-0.0719338	-0.070381
O00567	NOP56	0.544103	0.415473	0.557782	0.694512	0.544236	0.604338	0.576576	0.0787818	0.563851	0.522188	0.269475	-0.16745	0.622582	0.632878	0.725485	0.564551	0.519902	0.686768	0.308222	0.476395	0.842361	0.153682	0.486045	0.641773	-0.00568232	0.126802	0.493395	0.197457	-0.053131	0.722605	0.641462	0.172793	0.602294	0.51799	0.70628	0.0154942	0.577397	0.578774	0.611154	0.580655	0.551369	0.603582	0.597856	0.451889	0.165176	0.0444254	0.253105	0.114787
O00571	DDX3X	0.0871589	-0.0962384	0.252341	0.227407	-0.0157302	0.106049	0.0968197	0.04412	0.099142	0.13592	0.176285	0.157755	0.271312	0.0915713	0.102176	0.20513	0.12384	0.0737757	0.283187	0.177184	0.171892	0.196679	0.321882	0.303284	-0.000293274	0.344449	0.187292	0.148939	0.174844	0.362064	0.21654	0.0716452	0.399177	0.372966	0.376268	0.0966558	0.309224	0.14166	0.475653	0.317001	0.19658	0.295802	0.282232	0.155675	0.246378	0.171142	0.151273	0.0575971
O00584	RNASET2	0.00356666	0.0526689	-0.0144179	0.465008	0.189067	-0.0268996	0.18432	1.36364	-0.29841	0.418123	-0.73024	0.818598	0.113376	0.0395549	-0.406241	0.760587	0.240414	0.24269	0.692352	1.38634	0.706858	0.858175	-0.436761	-0.65464	-0.184099	0.339832	0.586007	-0.396717	0.911511	0.303068	-0.290335	0.336574	-0.0454598	-0.013268	-0.431269	0.071463	0.0849346	-0.392576	0.89182	0.196314	-0.0262379	0.344279	-0.518532	0.838954	-0.0938992	0.586154	1.30041	0.365478
O00625	PIR	-0.368214	0.277756	0.0580651	0.032903	0.0535824	0.32852	0.229925	0.295403	-0.362633	-0.56512	0.43473	0.4797	-0.209357	-0.020609	-0.487386	0.0556585	0.35574	-0.235394	0.689839	0.826439	0.233795	0.109198	0.298771	-0.298741	0.387061	0.137649	0.0095401	0.609563	-0.0408947	0.994379	-0.110081	0.609024	-0.500952	0.0426965	0.758024	0.234669	0.363473	0.0722636	1.66831	-0.757631	0.0630323	0.180795	-0.403238	1.15124	0.305258	0.887274	0.650376	-0.205808
O00629	KPNA4	-0.0862533	-0.133627	0.320284	-0.448015	0.259703	-0.0115942	0.0746416	-1.14664	0.0372961	0.122782	-0.00268161	-0.146357	0.247736	0.230491	0.338474	-0.142261	-0.0280528	0.0547518	0.105826	-0.165941	-0.0705155	-0.195682	0.148679	0.179318	0.405249	-0.115646	-0.138174	-0.164441	-0.178504	-0.320896	-0.0259222	-0.214523	-0.136192	-0.155823	-0.223968	-0.0921012	-0.3177	-0.0377313	-0.326135	-0.0696482	-0.0732392	-0.0716616	0.153584	-0.478336	-0.0714106	-0.0723681	-0.0719338	-0.330453
O00743	PPP6C	0.0551773	-0.0184565	0.151445	0.055958	0.373783	0.471708	0.569868	0.210602	0.10615	0.326957	-0.0750699	-0.119623	0.185689	0.300192	0.321298	0.0657775	0.038011	-0.0511382	-0.199086	0.0448665	0.0792136	-0.088779	0.034917	0.225329	0.254676	0.0845024	0.621518	0.139633	0.287884	0.0892601	0.0434593	0.132896	0.116743	0.0593829	-0.0141332	0.0385984	0.12077	0.161205	-0.00779811	-0.216704	-0.285225	0.103462	0.177166	-0.0229309	-0.106936	0.399997	0.128007	0.288337
O00754	MAN2B1	-0.227067	-0.239978	-0.0755248	-0.114269	-0.279088	-0.254959	-0.344443	-0.0373521	-0.944831	-0.799046	-0.909285	-0.979587	-0.0196039	-0.248952	-0.272587	0.137888	-0.0920283	-0.706128	0.218001	-0.271858	-0.0177004	-1.16347	-0.0728485	-0.194047	0.657233	0.0541648	0.0883025	0.0830534	0.399033	0.235075	-0.474127	0.274352	-0.143329	-0.241831	-0.0323473	-0.0486999	-0.184426	-0.0405663	0.164359	-1.52399	-1.02486	-1.13905	-0.137311	0.137158	-0.591826	-0.224859	-0.358337	-0.196663
O00764	PDXK	-0.212072	0.078472	-0.348851	-0.0176203	-0.00764563	-0.150978	-0.239451	0.285359	-0.201267	-0.420282	-0.189004	0.684391	-0.291815	0.0702547	-0.0844855	-0.494178	-0.466562	-0.269782	0.051019	-0.281308	0.0564933	0.154906	-0.215404	-0.307093	0.0934608	0.36245	-0.356345	-0.0743434	0.0557497	0.301994	-0.836698	0.217086	-0.646328	-0.482134	-0.0386976	0.392099	0.180643	-0.358437	0.108787	-0.302479	0.302855	-0.199809	-0.424253	0.0657528	-0.0727886	0.474271	0.411621	-0.0215875
O14497	ARID1A	-0.071341	-0.0714452	-0.0705412	-0.0720964	-0.0721662	-0.0722391	-0.0722065	-0.0726154	-0.0718019	-0.0710434	-0.072789	-0.0713537	-0.0705533	-0.0704325	-0.0710548	-0.0713588	-0.0713768	-0.0722234	-0.0711924	-0.0705648	-0.0705155	-0.0709777	-0.0720632	-0.072483	-0.0735226	-0.0722858	-0.0666033	-0.0683238	-0.0740938	-0.0712652	-0.0701293	-0.0708997	-0.0700396	-0.0667255	-0.0654228	-0.0757322	-0.0653662	-0.0710484	-0.072427	-0.0696482	0.245579	-0.206495	-0.0720372	-0.0713852	-0.0714106	-0.0723681	-0.0719338	-0.070381
O14521	SDHD	-0.071341	-0.0714452	-0.0705412	-0.0720964	-0.0721662	-0.0722391	-0.0722065	-0.0726154	-0.0718019	-0.0710434	-0.072789	-0.0713537	-0.0705533	-0.0704325	-0.0710548	-0.0713588	-0.0713768	-0.0722234	-0.0711924	-0.0705648	-0.0705155	-0.0709777	-0.0720632	-0.072483	-0.0735226	-0.0722858	0.681445	0.911591	0.53644	-0.0712652	-0.0701293	-0.0708997	-0.0700396	-0.0667255	-0.0654228	-0.0757322	-0.0653662	-0.0710484	-0.072427	-0.0696482	-0.0732392	-0.0716616	-0.0720372	-0.0713852	-0.0714106	-0.0723681	-0.0719338	-0.070381
O14530	TXNDC9	-0.071341	-0.0714452	-0.0705412	-0.0720964	-0.0721662	-0.0722391	-0.0722065	-0.0726154	-0.0718019	-0.0710434	-0.072789	-0.0713537	-0.0705533	-0.0704325	-0.0710548	-0.392412	-0.372646	-0.415731	-0.226272	-0.0705648	-0.0705155	-0.0709777	-0.0720632	-0.072483	-0.0735226	-0.0722858	-0.0666033	-0.0683238	-0.0740938	-0.0712652	-0.0701293	-0.0708997	-0.0700396	-0.0667255	-0.0654228	-0.0757322	-0.0653662	-0.0710484	-0.072427	-0.0696482	-0.0732392	-0.0716616	-0.0720372	-0.0713852	-0.0714106	-0.0723681	-0.0719338	-0.070381
O14531	DPYSL4	-0.071341	-0.0714452	-0.0705412	-0.0720964	-0.0721662	-0.0722391	-0.0722065	-0.0726154	-0.0718019	-0.0710434	-0.072789	-0.0713537	-0.0705533	-0.0704325	-0.0710548	-0.0713588	-0.0713768	-0.0722234	-0.0711924	-0.0705648	-0.0705155	-0.0709777	-0.0720632	-0.072483	-0.0735226	-0.0722858	-0.0666033	-0.0683238	-0.0740938	-0.0712652	-0.0701293	-0.0708997	-0.0700396	-1.4163	-1.3755	0.911247	-1.30359	-0.0710484	-0.072427	-0.0696482	-0.0732392	-0.0716616	-0.0720372	-0.0713852	-0.0714106	-0.0723681	-0.0719338	-0.070381
O14556	GAPDHS	0.450948	0.503986	0.196087	0.148444	0.8084	0.1786	0.476728	0.304967	0.455678	0.217892	0.548084	0.419759	0.747852	-0.020609	0.0582353	0.496178	0.163995	-0.187749	0.868561	0.152706	-0.054877	0.184381	0.564692	0.219035	0.775782	0.29219	0.249831	1.08087	0.40062	0.341337	-0.116407	0.491866	0.52569	0.278843	0.559579	0.465632	0.78252	0.408297	0.40622	0.0826421	0.571309	0.171253	0.398877	0.509711	0.12618	0.765047	0.735346	0.695323
O14561	NDUFAB1	-0.198363	0.700366	0.404457	-0.151102	0.445507	0.393999	-0.00539321	0.409653	0.605403	-0.361395	0.499296	-0.927538	1.26388	-0.482577	0.592795	0.486723	-0.264128	0.231516	0.455627	0.665419	-0.162085	-1.20939	-0.0109629	0.663495	-0.190498	0.26838	0.481404	1.06711	0.0839795	0.115905	0.753593	-0.229556	0.625625	0.554541	0.326809	-0.193208	0.237005	0.48598	0.39259	-0.991044	-0.0262379	0.874096	1.24672	0.0401766	-0.061863	0.326362	-0.0243018	0.52803
O14562	UBFD1	-0.071341	-0.0714452	-0.0705412	-0.0720964	-0.0721662	-0.0722391	-0.0722065	-0.0726154	-0.0718019	-0.0710434	-0.072789	-0.0713537	-0.0705533	-0.0704325	-0.0710548	-0.0713588	-0.0713768	-0.0722234	-0.0711924	-0.0705648	-0.0705155	-0.0709777	-0.0720632	-0.072483	-0.0735226	-0.0722858	-0.0666033	-0.0683238	-0.0740938	-0.0712652	-0.0701293	-0.0708997	-0.0700396	-0.0667255	-0.0654228	-0.0757322	-0.0653662	-0.0710484	-0.072427	-0.0696482	-0.0732392	-0.0716616	-0.0720372	-0.141509	-0.0714106	-0.0723681	-0.0719338	-0.070381
O14579	COPE	-0.00750432	-0.222471	-0.265989	-0.0233944	0.219582	0.107901	0.190233	0.227395	0.0937929	0.248795	0.142579	0.404263	0.115333	0.0575509	0.111423	0.23643	0.260294	0.386995	0.338921	0.169874	-0.0526802	0.333825	0.0997627	0.0611944	0.162237	0.29219	0.0811059	0.148409	0.327382	0.204694	-0.0225096	0.135215	0.0750682	-0.0201764	0.12448	0.0886453	-0.0231197	0.00252396	0.17985	-0.148446	0.0846052	-0.126802	-0.119213	-0.141509	0.43879	0.373308	0.485193	0.107265
O14602	EIF1AY	0.471646	0.359068	0.481356	0.134021	0.267024	0.305576	0.710028	0.145988	0.409363	0.206871	0.174111	-0.0323426	0.630066	0.545173	0.485025	-0.13991	-0.0571567	-0.595817	-0.412693	0.342229	-0.0851303	0.137888	0.150643	0.558231	0.19845	0.471597	0.450929	0.237884	0.248261	-0.174323	0.183004	-0.205161	0.0321289	0.437639	0.0835591	0.204188	0.453008	0.671573	-0.167899	1.26582	0.307964	0.350888	0.322152	0.422918	0.109687	-0.238325	-0.0278649	0.33682
O14617	AP3D1	-0.125258	-0.0706457	0.0476271	-0.113874	-0.0403945	-0.24509	-0.249574	-0.349409	-0.259253	-0.248473	-0.00167155	-0.177023	-0.186315	-0.231597	-0.253719	-0.104711	-0.0373822	0.00407624	-0.00724707	-0.253969	-0.390507	-0.0992446	-0.113191	-0.0488368	-0.0425945	-0.00733051	0.0358295	-0.0868539	-0.0127918	-0.183277	-0.116407	-0.0393936	-0.0591214	0.0341351	-0.0889295	-0.0860192	-0.0957627	0.0443201	-0.205839	-0.159396	-0.243305	-0.283745	0.160092	-0.206107	-0.207562	-0.151419	-0.23871	-0.0823601
O14618	CCS	-0.264434	-0.298475	-0.120856	-0.141073	-0.287002	-0.290464	-0.395713	0.247186	0.055918	0.0146144	0.5728	0.000491846	0.185	0.0409858	-0.0548967	-0.0945854	0.146183	0.0873308	0.128719	-0.365939	-0.281561	-0.682421	0.176214	0.186563	0.0210071	0.26838	-0.27261	0.224496	-0.309451	-0.107126	-0.37862	0.233768	0.0906167	-0.0158471	-0.249401	0.213172	0.615052	-0.0882697	0.0768738	0.187553	-0.134491	0.476458	0.554842	0.201628	0.0469724	0.0212523	0.000873491	-0.0567962
O14647	CHD2	0.0891664	-0.00377778	-0.0625548	0.00576257	-0.0301975	-0.00605127	-0.0102195	0.0349872	-0.00527229	0.0608277	0.108589	0.172604	-0.0410616	0.0285195	-0.0371677	0.128846	0.144867	0.143261	0.103741	0.154285	0.125504	0.128768	0.179654	0.144159	-0.0225336	0.135872	-0.0173722	0.0287248	0.107641	0.117456	-0.148074	0.0547725	0.0384443	0.0536834	0.0339412	0.00298052	0.0790508	0.106769	0.0983111	-0.00808563	0.045069	-0.037495	-0.168932	-0.0485603	0.0687517	0.0627791	0.132585	0.088332
O14653	GOSR2	-0.071341	-0.0714452	-0.0705412	-0.0720964	-0.0352846	-0.144064	0.116474	0.278027	-0.118397	-0.299651	-0.193805	-0.440854	-0.450817	-0.503529	-0.538276	-0.18663	-0.245846	-0.341486	-0.106741	-0.208926	-0.217775	-0.367456	-0.526439	-0.246652	-0.198799	-0.350496	-0.131333	-0.11463	-0.175546	0.0547194	0.0195938	0.0662784	-0.241044	-0.301405	-0.244055	-0.0778336	-0.0630687	-0.570296	-0.177308	-0.0906749	0.0985205	0.155247	-0.186495	-0.165024	0.0413387	-0.0832552	0.0612048	-0.070381
O14656	TOR1A	0.0470891	-0.0443945	-0.0597532	0.0699237	0.109039	0.0634496	0.0954501	0.146926	0.0056202	0.00110354	0.000594225	0.134604	0.109809	-0.0291441	0.0366852	0.0771095	-0.335793	-0.0443859	0.109109	0.0232048	-0.101165	0.0691052	-0.0182199	-0.102346	-0.0810833	0.0357553	-0.104739	0.0515397	0.410942	-0.142226	-0.180659	-0.206158	-0.120609	0.165626	0.17475	-0.0763226	-0.0895786	-0.000511578	-0.0589437	0.0176696	-0.0551418	0.0827544	-0.0139682	0.141806	0.249813	0.136503	0.252195	-0.0483608
O14657	TOR1B	-0.071341	-0.0714452	-0.0705412	-0.0720964	-0.0721662	-0.0722391	-0.0722065	-0.0726154	-0.0718019	-0.0710434	-0.072789	-0.0713537	-0.0705533	-0.0704325	-0.0710548	-0.0713588	-0.0713768	-0.0722234	-0.0711924	-0.0705648	-0.0705155	-0.0709777	-0.0720632	-0.072483	-0.0735226	-0.0722858	-0.672883	-0.543396	0.165259	-0.0712652	-0.0701293	-0.0708997	-0.0700396	-0.0667255	-0.0654228	-0.0757322	-0.0653662	-0.0710484	-0.072427	-0.0696482	-0.0732392	-0.0716616	-0.0720372	-0.0713852	-0.0714106	-0.0723681	-0.0719338	-0.070381
O14662	STX16	-0.73797	-0.239334	-0.29781	-0.402386	0.10847	-0.0539219	0.127493	-0.634604	-0.0718019	-0.0710434	-0.072789	-0.0713537	0.351447	0.190246	0.343569	-0.00913411	0.158732	-0.149966	-0.151913	-0.0705648	-0.0705155	-0.0709777	0.240302	0.410606	0.315308	0.417406	0.215824	-0.0778987	-0.0717774	0.377011	0.576188	-0.586504	0.281264	0.702862	0.141775	0.464708	0.542207	0.543425	0.0193634	-0.503205	-0.0567363	0.14037	0.444267	-0.0496694	-0.117115	-0.600817	-0.600616	-0.0978873
O14672	ADAM10	-0.231325	-0.0724881	-0.0738594	-0.276037	0.0298064	-0.0423358	0.0088424	-0.0379901	-0.0109315	-0.222387	-0.183409	0.175918	0.0147394	0.0277894	-0.0144163	0.0684279	-0.0102554	-0.00413786	-0.0563591	0.209269	0.394746	0.198596	0.182579	0.216418	0.217269	0.520495	-0.101749	-0.106535	0.00595278	-0.310674	0.21201	0.0508968	-0.190388	0.0505424	0.00467088	0.112919	0.012262	0.109277	0.0654044	-0.0403498	-0.0771915	-0.0302385	0.140086	0.103071	0.213067	0.198063	-0.0630327	0.0832552
O14678	ABCD4	0.00521364	0.0366956	0.157971	0.161154	0.226364	0.409157	0.481613	0.458542	-0.0497849	-0.0024563	0.483698	-0.200994	-0.618207	-0.283765	-0.661725	0.15252	-0.149905	0.296885	0.242761	0.0506493	-0.0553442	-0.00440721	-0.554786	-0.216383	-0.00141984	0.0922165	-0.0275083	-0.187178	-0.03379	0.0482698	0.115624	-0.0188524	-0.107234	-0.13773	-0.00384939	0.0768019	0.0587843	-0.0591944	0.0236681	-0.220758	0.259539	-0.0389944	0.114109	0.10803	-0.510586	0.0225543	-0.00356686	0.28532
O14727	APAF1	-0.071341	-0.0714452	-0.0705412	-0.0720964	-0.0721662	-0.0722391	-0.0722065	-0.0726154	-0.0718019	-0.0710434	-0.072789	-0.0713537	-0.0705533	-0.0704325	-0.0710548	-0.0713588	-0.0713768	-0.0722234	-0.0711924	-0.0705648	-0.0705155	-0.0709777	-0.0720632	-0.072483	-0.0735226	-0.0722858	-0.0666033	-0.0683238	-0.0740938	-0.0712652	-0.0701293	-0.0708997	-0.0700396	-0.0667255	-0.0654228	-0.0757322	-0.0653662	-0.0710484	-0.072427	-0.21842	0.0258294	-0.238975	-0.0720372	-0.0713852	-0.0714106	-0.0723681	-0.0719338	-0.070381
O14735	CDIPT	0.00706378	0.0396579	-0.0938831	0.105291	-0.210751	-0.272046	-0.157067	0.0561218	-0.542461	0.235444	-0.357092	0.27314	-0.46276	-0.202998	-0.397332	-0.0748192	0.235269	-0.113904	0.0667869	0.0876837	-0.132156	0.335938	-0.0140132	-0.169277	0.242089	-0.111198	0.0161917	-0.381641	-0.212132	-0.32082	-0.140367	-0.152232	0.0357123	0.0942638	-0.443762	0.260716	0.0527902	-0.0109463	0.0445677	-0.00240183	0.481461	-0.095698	-0.00287182	0.0779367	0.4016	0.0566952	0.336966	-0.330453
O14737	PDCD5	0.10383	-0.0973903	-0.474568	-0.0639941	0.0970666	0.210188	0.245302	-1.00207	0.321829	0.233255	0.14093	-0.162093	0.0941224	0.306292	0.106656	0.505501	0.440552	0.266411	0.366125	0.0821468	-0.129526	-0.543396	0.08681	0.281116	0.194674	0.36874	0.0875832	0.121005	0.0567439	0.214837	0.342387	0.155467	0.420405	0.0648092	-0.073757	0.0690191	0.118325	-0.128371	-0.441994	-0.117021	-0.942719	-0.330211	-0.218478	0.206345	0.0948432	-0.961532	-0.499297	0.195891
O14744	PRMT5	0.269093	0.0933315	0.102171	-0.126339	-0.648276	-0.0483388	-0.397066	-0.0841474	0.0758545	-0.28407	-0.00617269	-0.294041	0.0482761	-0.0634446	0.088755	-0.511778	-0.699142	0.256605	-0.745484	-0.0403844	0.102963	-0.139365	0.00377276	0.0974013	0.268433	0.182089	0.0219117	0.0992229	-0.266685	-0.156807	-0.0638898	0.0191361	-0.0481142	-0.13779	-0.0689182	-0.0752582	-0.191988	0.0118249	-0.0804826	0.301993	-0.114758	0.111909	-0.181351	-0.223772	-0.0714106	-0.0723681	-0.95432	-0.0633535
O14745	SLC9A3R1	-0.994593	-0.963932	-1.16472	-1.33477	-1.23467	-0.962469	-0.637613	-2.13451	-0.844217	-1.30714	-0.934318	-1.58161	-0.811809	-1.20221	-1.00577	-0.883106	-0.731977	-0.746146	-0.973781	-0.931454	-0.763536	-0.922379	-0.988729	-1.06314	-0.454818	-1.04064	-0.836396	-0.572137	-0.933781	-1.05649	-0.217154	-0.947122	-0.759401	-0.697491	-0.839502	-1.00045	-0.830091	-0.709941	-0.880228	-0.422179	-0.543027	-0.792847	-0.675356	-1.00932	-0.685568	-1.09916	-0.868459	-0.951054
O14772	FPGT	0.100704	0.0660127	0.208927	-0.0794292	0.0366419	-0.0013572	-0.0659322	0.14024	-0.173217	-0.190455	-0.0963736	-0.134053	-0.277247	-0.208386	-0.367635	-0.292095	-0.389663	-0.375397	-0.441273	-0.330833	-0.3176	-0.460799	-0.515051	-0.342101	-0.305936	-0.300786	-0.508327	-0.470455	-0.27657	-0.335768	-0.450527	-0.391325	-0.572555	-0.68857	-0.674088	0.0897623	-0.327948	-0.0856957	-0.0212967	-0.400525	-0.1412	-0.264985	-0.224385	-0.173336	-0.226364	-0.125302	-0.265156	-0.00324857
O14773	TPP1	0.0680805	0.217233	0.242838	0.223159	-0.0774716	0.00258436	0.0622391	0.79139	-0.200005	0.217892	-0.380643	0.738159	0.103785	-0.111771	0.192929	0.874523	0.140628	0.79534	0.273882	0.486469	0.45685	0.803503	0.0373565	-0.0915666	0.165819	0.389157	0.12501	0.0122949	0.257366	0.114246	0.104185	0.241842	-0.139567	0.0130413	0.172655	0.119001	-0.0634969	-0.10224	0.651833	-0.150548	0.587222	0.107349	0.118303	0.420285	-0.241361	1.25811	1.00088	0.234837
O14776	TCERG1	-0.071341	-0.0714452	-0.0705412	-0.0720964	-0.0331118	0.0265877	0.0953309	0.0203917	0.0388214	0.237291	0.127844	0.0666806	-0.0323881	-0.085133	0.0266003	0.141626	0.137732	0.133096	-0.0468518	-0.0443859	0.207195	-0.279279	0.462256	0.520755	0.150112	0.443526	0.26046	0.193301	0.0982704	0.161786	0.0409976	0.392246	0.142504	-0.0594758	0.0525378	0.296645	-0.0691352	0.345752	0.110088	0.0814364	0.0679831	0.100492	0.100497	0.101147	-0.0714106	-0.0723681	-0.0719338	-0.070381
O14787	TNPO2	-0.141636	-0.0743271	0.0807445	-0.172488	-0.0442645	-0.162972	-0.17017	-0.203634	-0.146112	-0.0779002	-0.352727	-0.363053	-0.0936579	-0.275091	-0.328326	-0.0891949	-0.128578	-0.0803727	-0.382356	-0.162576	-0.378878	-0.438352	-0.33973	-0.430122	-0.228596	-0.489703	-0.149384	0.0574071	-0.205219	-0.429544	-0.0446714	-0.51138	-0.146826	0.135655	0.12448	-0.0114075	0.0834368	-0.23824	-0.439022	0.238713	-0.112275	-0.256788	-0.0402276	-0.231691	-0.109436	0.0480831	-0.162732	-0.225333
O14795	UNC13B	-0.071341	-0.0714452	-0.0705412	-0.0720964	-0.0721662	-0.0722391	-0.0722065	-0.0726154	-0.0718019	-0.0710434	-0.072789	-0.0713537	-0.0705533	-0.0704325	-0.0710548	-0.0713588	-0.0713768	-0.0722234	-0.0711924	-0.0705648	-0.0705155	-0.0709777	-0.0720632	-0.072483	-0.0735226	-0.0722858	-0.423411	-0.661883	-0.318062	-0.0712652	-0.0701293	-0.0708997	-0.0700396	-0.0667255	-0.0654228	-0.0757322	-0.0653662	-0.0710484	-0.072427	-0.0696482	-0.0732392	-0.0716616	-0.0720372	-0.0713852	-0.0714106	-0.0723681	-0.0719338	-0.070381
O14807	MRAS	-0.071341	-0.0714452	-0.0705412	-0.0720964	-0.0721662	-0.0722391	-0.0722065	-0.0726154	-0.0718019	-0.0710434	-0.072789	-0.0713537	-0.771518	-0.56927	-0.623804	-0.0713588	-0.0713768	-0.0722234	-0.0711924	-0.0705648	-0.0705155	-0.0709777	-0.0720632	-0.072483	-0.0735226	-0.0722858	-0.0666033	-0.0683238	-0.0740938	-0.0712652	-0.0701293	-0.0708997	-0.0700396	-0.0667255	-0.0654228	-0.0757322	-0.0653662	-0.0710484	-0.072427	-0.0696482	-0.0732392	-0.0716616	-0.0720372	-0.0713852	-0.0714106	-0.0723681	-0.0719338	-0.070381
O14818	PSMA7	-0.0508684	-0.167129	0.0664338	0.0528644	0.0859714	0.217829	0.324499	0.427027	-0.0161472	-0.130537	-0.00617269	0.0111838	0.011159	-0.0267314	0.0131463	-0.123886	0.0129162	-0.00337822	0.0852377	-0.013697	-0.164995	0.12362	0.111505	0.05621	-0.0180651	0.265949	-0.142985	-0.0398848	0.126686	-0.103611	-0.086902	0.0522268	-0.112715	0.0219644	0.0814543	-0.132922	0.0114867	0.0756822	0.108787	-0.138719	-0.0395484	-0.0902565	0.022324	-0.120528	0.456349	0.340561	0.353192	-0.0148846
O14841	OPLAH	-0.059401	0.0944801	0.0275251	0.476027	-0.0742733	0.169156	0.0363246	-0.0272213	0.251984	0.363564	0.591361	0.129855	-0.0051653	0.072432	-0.139086	0.606962	0.310684	0.533456	0.51646	0.538692	0.795189	0.196679	0.673889	-0.311126	0.433632	-0.555332	-0.407867	0.245445	-0.68873	0.147638	-0.0133302	0.512611	0.114571	0.126237	0.713095	-0.0337605	-0.00028013	0.0233207	0.754771	-0.0839598	0.442842	-0.0106707	0.0843445	0.0427253	-0.326046	-0.231212	0.660159	0.355693
O14874	BCKDK	-0.26939	-0.0477788	-0.234586	-0.152351	-0.354906	-0.512021	-0.456726	-0.296291	0.0340522	-0.256377	0.0179833	0.000787637	-0.141786	-0.152645	-0.157354	-0.194435	-0.0136644	-0.145443	-0.0399436	-0.600079	-0.581462	-0.705565	-0.143844	0.0285081	-0.107182	-0.00862534	-0.329394	-0.256671	-0.0844743	-0.308328	-0.174825	-0.289864	-0.267095	-0.155823	0.092495	0.819998	0.355527	-0.0872319	-0.0113448	-0.216743	-0.303945	-0.110933	0.0702635	-0.235796	-0.240596	-0.0908495	-0.335635	-0.0188738
O14879	IFIT3	-0.071341	-0.0714452	-0.0705412	-0.0720964	-0.0721662	-0.0722391	-0.0722065	-0.0726154	-0.0718019	-0.0710434	-0.072789	-0.0713537	-0.0705533	-0.0704325	-0.0710548	-0.0713588	-0.0713768	-0.0722234	-0.0711924	-0.0705648	-0.0705155	-0.0709777	-0.0720632	-0.072483	-0.0735226	-0.0722858	-0.359116	-0.244666	0.772542	-0.0712652	-0.0701293	-0.0708997	-0.0700396	-0.0667255	-0.0654228	-0.0757322	-0.0653662	-0.0710484	-0.072427	-0.0696482	-0.0732392	-0.0716616	-0.0720372	-0.0713852	-0.0714106	-0.0723681	-0.0719338	-0.070381
O14880	MGST3	0.414216	0.781574	0.448293	0.101393	0.368465	0.25553	-0.0541188	0.5873	-0.156216	-0.473596	-0.00380066	-0.355581	0.105847	0.914523	0.604424	0.181138	-0.123439	0.274323	0.269216	-0.0828062	0.425826	-0.277386	-1.14839	0.311644	0.270703	-0.139007	0.196421	0.101946	-0.0219106	0.156367	0.0320311	-0.112032	-0.0693787	-0.217549	0.386056	-0.231224	-0.114377	0.316645	0.344985	0.17483	0.111348	-0.0123334	0.146	-0.0603647	-0.413259	-0.719441	-0.479645	0.283162
O14907	TAX1BP3	0.500729	0.36535	0.474698	0.351665	1.15928	0.661139	1.51814	0.432374	-0.150575	0.190676	-0.143534	0.250529	0.449336	0.471785	0.469831	0.466064	0.673104	0.534196	0.372515	0.547084	0.538342	0.17072	0.483569	0.31456	-0.0376416	0.310418	0.580105	0.472063	0.32503	0.314217	0.519966	0.517261	0.693648	0.728716	0.511408	0.183934	0.582116	0.609807	0.410896	0.720128	0.244162	0.91773	0.636434	0.426554	1.10193	0.207211	0.483537	0.291176
O14908	GIPC1	0.21448	0.460498	0.272775	0.332546	0.226364	0.409157	0.481613	0.458542	-0.16288	-0.251472	-0.127021	0.125265	0.0352047	-0.153719	-0.143512	-0.298562	-0.107687	-0.123314	-0.472055	-0.060054	-0.0731018	-0.0360094	0.126931	-0.0355194	0.145308	0.359015	0.171821	0.268757	-0.158005	0.096618	-0.113743	0.0480654	0.0737552	0.0485641	-0.0393601	0.136978	0.0878408	0.075492	0.112088	-0.451785	0.0778071	-0.344376	0.00145362	0.109123	-0.189486	0.0465205	0.0477319	0.169014
O14920	IKBKB	-0.071341	-0.0714452	-0.0705412	-0.0720964	-0.0721662	-0.0722391	-0.0722065	-0.0726154	-0.0718019	-0.0710434	-0.072789	-0.0713537	-0.0705533	-0.0704325	-0.0710548	-0.0713588	-0.0713768	-0.0722234	-0.0711924	-0.0705648	-0.0705155	-0.0709777	-0.0890034	-0.0130372	0.185854	0.256735	-0.0666033	-0.0683238	-0.0740938	-0.0712652	-0.0701293	-0.0708997	-0.0700396	-0.0667255	-0.0654228	-0.0757322	-0.0653662	-0.0710484	-0.072427	-0.0696482	-0.0732392	-0.0716616	-0.0720372	-0.0713852	-0.0714106	-0.0723681	-0.0719338	-0.070381
O14933	UBE2L6	-0.30286	-0.148634	-0.73744	-0.00141065	-0.204015	-0.194428	-0.114341	0.413663	-0.233311	0.0525774	-0.330664	0.426877	-0.3468	-0.386258	-0.347849	-0.486458	-0.340323	-0.364571	0.0873276	-0.0383975	-0.355118	0.179342	-0.291699	-0.213907	0.13562	0.279622	-0.351937	-0.596599	0.917733	-0.129767	-0.369105	-0.123104	-0.303775	-0.395668	-0.388963	0.194604	-0.365741	-0.475933	-0.134984	-0.1812	0.560481	-0.0788167	-0.47685	-0.2009	-0.345269	0.578267	0.570726	-0.0820586
O14936	CASK	-0.071341	-0.0714452	-0.0705412	-0.0720964	-0.0721662	-0.0722391	-0.0722065	-0.0726154	-0.0718019	-0.0710434	-0.072789	-0.0713537	-0.0705533	-0.0704325	-0.0710548	-0.0713588	-0.0713768	-0.0722234	-0.0711924	-0.0705648	-0.0705155	-0.0709777	-0.0720632	-0.072483	-0.0735226	-0.0722858	-0.429434	-0.292263	-0.342334	-0.0712652	-0.0701293	-0.0708997	-0.0700396	-0.0667255	-0.0654228	-0.0757322	-0.0653662	-0.0710484	-0.072427	-0.0696482	-0.0732392	-0.0716616	-0.0720372	-0.0713852	-0.0714106	-0.0723681	-0.0719338	-0.070381
O14949	UQCRQ	-0.0558726	-0.105436	-0.584074	-0.0659473	-1.14221	-0.42806	-0.675296	-0.330764	0.0389064	-0.344724	-0.518318	-0.282661	0.260297	0.101845	0.050753	-0.00410915	-0.311557	-0.0548359	-0.196384	0.321045	0.165779	-0.305168	-0.80506	-0.748631	0.258303	-0.176937	0.35377	-0.81907	-0.326913	-0.149302	0.0503662	-0.247125	-0.119983	0.167973	0.674683	-0.461425	-0.924916	0.204022	0.261997	-0.12463	-0.381342	0.0344927	0.0131514	-0.0637535	-0.529591	-0.682695	-0.255998	-0.0600581
O14950	MYL12B	0.343951	0.398632	0.4421	0.243051	-0.0935842	-0.00780114	0.312166	-0.437909	-0.0610607	-0.0717755	0.00473461	0.00225323	-0.0502381	-0.109745	-0.0931843	-0.0646384	0.0490227	-0.138597	0.327157	0.39197	0.145361	0.622339	0.233649	0.124001	-0.561442	0.0242112	-0.0599422	0.0617995	0.322702	-0.42527	-0.361914	-0.349299	-0.217902	0.139032	-0.0258504	-0.412474	0.10197	-0.0609598	-0.0405233	-0.334168	-0.0333629	-0.143001	-0.267147	-0.0623471	0.0601514	0.00843373	0.0371131	0.0255954
O14964	HGS	0.0196172	-0.0461281	-0.015198	-0.181531	0.0192852	0.16279	0.192373	-0.382821	-0.0432456	-0.00982696	0.00207455	-0.0994224	-0.116264	-0.00968544	-0.156013	-0.147392	-0.0801748	0.0349903	-0.0474499	-0.0705648	-0.593282	-0.668994	-0.0325222	0.0544715	0.3512	-0.254097	-0.307126	0.135494	-0.184081	0.0614838	-0.0943653	-0.0293153	0.00551917	-0.0686733	-0.201371	-0.345511	0.00117378	-0.512226	-0.144251	0.371477	-0.0365949	-0.112116	0.227718	-0.238857	-0.450648	-0.187447	-0.39001	-0.234677
O14967	CLGN	-0.071341	-0.0714452	-0.0705412	-0.0720964	-0.0721662	-0.0722391	-0.0722065	-0.0726154	-0.0718019	-0.0710434	-0.072789	-0.0713537	-0.0705533	-0.0704325	-0.0710548	-0.0713588	-0.0713768	-0.0722234	-0.0711924	-0.0705648	-0.0705155	-0.0709777	-0.0720632	-0.072483	-0.0735226	-0.0722858	-0.0666033	-0.0683238	-0.0740938	-0.0712652	-0.0701293	-0.0708997	-0.0700396	-1.00316	-1.02873	0.875025	-1.08474	-0.0710484	-0.072427	-0.0696482	-0.0732392	-0.0716616	-0.0720372	-0.0713852	-0.0714106	-0.0723681	-0.0719338	-0.070381
O14972	VPS26C	-0.071341	-0.0714452	-0.0705412	-0.0720964	0.226364	0.409157	0.481613	0.458542	-0.110777	-0.0925848	-0.0523274	0.197403	-0.0210948	-0.239262	-0.281268	-0.0556259	0.0434246	-0.0239503	-0.101881	-0.0468219	-0.176414	0.0738605	0.221267	-0.145778	0.0307543	0.0951153	-0.000230785	0.130274	0.109276	-0.0795131	-0.208158	-0.0505578	-0.0382964	-0.177511	0.0806766	-0.353355	-0.110545	-0.0348094	-0.105421	-0.0884161	-0.0716139	0.0174489	-0.114234	0.516513	-0.196144	0.211301	0.13622	-0.070381
O14974	PPP1R12A	-0.071341	-0.0714452	-0.0705412	-0.0720964	-0.0721662	-0.0722391	-0.0722065	-0.0726154	-0.0718019	-0.0710434	-0.072789	-0.0713537	-0.0705533	-0.0704325	-0.0710548	0.0295301	0.0822647	0.0413362	0.0534283	-0.0705648	-0.0705155	-0.0709777	-0.0720632	-0.072483	-0.0735226	-0.0722858	-0.0666033	-0.0683238	-0.0740938	-0.0712652	-0.0701293	-0.0708997	-0.0700396	-0.0667255	-0.0654228	-0.0757322	-0.0653662	-0.0710484	-0.072427	-0.0696482	-0.0732392	-0.0716616	-0.0720372	-0.0713852	-0.0714106	-0.0723681	-0.0719338	-0.070381
O14976	GAK	0.0279322	0.445608	0.275563	0.352658	0.230264	0.0932459	0.103289	-0.0373521	0.363876	0.361593	0.392609	0.176574	-0.13414	-0.0634446	-0.034848	0.102164	0.0526665	0.0307029	0.12799	0.0806944	0.0936388	0.188706	-0.224716	-0.12085	0.239081	-0.0993363	-0.12403	-0.164564	0.0705581	0.2511	0.16306	0.244454	0.055855	-0.121749	-0.140338	-0.209124	-0.00962291	0.0630772	0.14381	-0.34413	0.780308	0.246738	-0.0402276	-0.377964	-0.306462	-0.107901	-0.176304	0.183526
O14979	HNRNPDL	0.617849	0.177503	0.26769	-0.0683216	0.621018	0.144586	0.0528886	-0.945708	0.296518	0.329565	0.538987	-0.648272	0.145704	0.630152	0.426095	0.100464	0.30745	-0.0687427	-0.684848	0.38086	0.744904	0.0668272	0.552102	0.251745	-0.177523	-0.149341	0.287742	0.771063	-0.115915	0.395677	0.236805	-0.0631524	0.194955	0.348874	0.568823	0.209455	0.518139	0.314796	0.0860531	0.796105	0.467595	0.230626	0.523608	0.568645	0.242416	-0.734132	-0.0187726	0.0687442
O14980	XPO1	0.0166096	0.0647966	0.135676	0.118293	0.00946278	-0.00469514	-0.0116415	-0.399132	0.106907	0.0330386	0.0466765	-0.271148	0.196056	0.187288	0.196328	0.10326	0.0986403	0.130586	-0.286403	0.135001	0.259029	0.0849426	0.152022	0.279848	0.0447442	0.247448	0.0919092	0.174665	0.146849	0.31637	0.153697	0.266973	0.243197	0.139032	0.133516	0.0886453	0.0964953	0.122799	0.0142696	0.0101965	0.296642	-0.00105498	0.153584	0.0935974	0.141063	-0.122911	-0.218831	-0.102718
O14981	BTAF1	-0.193854	-0.116418	-0.190868	-0.165185	-0.250501	-0.265603	-0.332836	-0.336988	-0.244615	-0.260204	-0.152397	-0.196537	-0.557166	-0.121199	-0.439752	-0.329414	-0.179972	-0.39008	-0.482264	-0.0641752	0.063645	-0.923503	-0.79783	-0.603347	-0.713803	-0.757446	-0.60812	-0.340116	-0.54737	-0.0339746	-0.0934153	-0.246161	-0.190388	-0.140404	0.036275	0.000582161	-0.0388124	-0.0307722	-0.225322	0.0785418	-0.478671	-0.0591338	0.191834	-0.364868	-0.569552	-0.177952	-0.426631	-0.208757
O15020	SPTBN2	-0.522085	-0.748571	-1.14955	-0.743381	-0.467361	-0.509298	-0.562437	-0.813422	-0.820739	-1.00349	-0.714359	-1.00864	-0.668428	-0.547197	-0.53447	-0.594858	-0.789769	-0.496158	-0.384336	-0.80274	-0.358294	-0.955677	-1.2286	-1.05299	-2.35287	-0.761792	-0.429434	-0.534129	-0.750601	-0.854717	-0.543893	-0.891887	-0.851266	-0.735212	-0.586455	-0.824558	-0.70366	-0.666345	-0.88155	-0.618569	-0.898741	-0.713357	-0.523052	-0.478336	-0.722762	-0.740288	-0.739557	-0.488551
O15031	PLXNB2	0.109523	0.132723	0.0433908	-0.12264	-0.276237	-0.156169	-0.343397	-0.276072	-0.312884	-0.0876075	-0.413884	-0.558615	-0.476138	0.00616675	-0.0125444	-0.232742	-0.132414	-0.323141	-0.534004	-0.132677	-0.209344	0.146934	-0.189542	-0.169277	-0.0764366	-0.410904	-0.445687	-0.339127	-0.424291	-0.160978	-0.0955306	-0.123561	-0.0319812	-0.00110604	-0.0503304	-0.122749	0.0689049	-0.0851457	-0.396574	-0.408467	-0.35	-0.666457	-0.205237	-0.271898	-0.53369	-0.246622	-0.331468	-0.0963465
O15040	TECPR2	-0.071341	-0.0714452	-0.0705412	-0.0720964	-0.0721662	-0.0722391	-0.0722065	-0.0726154	-0.0718019	-0.0710434	-0.072789	-0.0713537	-0.0705533	-0.0704325	-0.0710548	-0.0713588	-0.0713768	-0.0722234	-0.0711924	-0.0705648	-0.0705155	-0.0709777	-0.0720632	-0.072483	-0.0735226	-0.0722858	-0.0666033	-0.0683238	-0.0740938	-0.0712652	-0.0701293	-0.0708997	-0.0700396	-0.0667255	-0.0654228	-0.0757322	-0.0653662	-0.0710484	-0.072427	-0.0696482	-0.0732392	-0.0716616	-0.0720372	-0.245881	-0.0714106	-0.0723681	-0.0719338	-0.070381
O15042	U2SURP	-0.0319006	0.267591	0.287633	0.0500178	0.183593	0.0202102	0.0528886	0.181339	0.882925	-0.366789	0.391834	0.385268	0.192523	0.0585221	0.243947	0.256471	0.575185	0.416292	0.411797	0.509024	-0.104978	-0.489277	0.393532	0.278487	0.513135	0.458298	0.164296	0.0947709	0.0631177	0.164026	0.235839	0.470919	0.223295	-0.0393206	0.141775	0.383142	0.179032	0.585619	0.155145	-0.135924	0.161007	0.41072	0.0922902	0.237385	0.188538	0.162863	0.0884177	-0.0469615
O15061	SYNM	-0.7107	-0.489586	-0.861911	-0.922188	-0.719748	-0.692685	-0.779712	-0.997565	-1.28439	-0.820508	-0.644232	-0.797723	-0.925672	-1.09245	-1.05845	-0.57441	-1.56626	-1.38196	-0.507999	-1.32749	-1.48426	-0.867039	-0.720682	-1.30661	-1.02351	-1.36361	-0.893992	-1.48034	-1.52899	-1.14309	-1.42484	-0.52387	-0.63515	-0.832722	-0.986612	0.848324	-0.857336	-0.97921	-1.13531	-0.925802	-1.18703	-1.04318	-0.0899361	-0.885031	-1.44767	-1.02717	-1.12967	-0.858811
O15067	PFAS	-0.0134537	0.126682	0.300474	0.192998	0.00597432	0.191298	0.13721	-0.00485618	0.385635	0.195914	0.0882951	0.32273	0.226984	-0.0601004	-0.0983473	0.128455	0.0936917	-0.0726206	0.141408	0.220605	0.117219	0.168668	-0.0359538	0.272146	0.609869	0.0690122	0.391963	0.329519	0.115707	-0.0644826	-0.0275667	0.119729	0.112234	0.0829786	-0.0641148	-0.140856	0.128923	0.11095	-0.0691563	0.102708	0.273364	0.308122	0.2138	0.210985	0.0509384	0.149638	0.0879026	-0.110577
O15075	DCLK1	-0.071341	-0.0714452	-0.0705412	-0.0720964	-0.0721662	-0.0722391	-0.0722065	-0.0726154	-0.0718019	-0.0710434	-0.072789	-0.0713537	-0.0705533	-0.0704325	-0.0710548	-0.0713588	-0.0713768	-0.0722234	-0.0711924	-0.0705648	-0.0705155	-0.0709777	-0.0720632	-0.072483	-0.0735226	-0.0722858	-0.0666033	-0.0683238	-0.0740938	-0.0712652	-0.0701293	-0.0708997	-0.0700396	-0.490904	-0.475685	1.28969	-0.418354	-0.0710484	-0.072427	-0.0696482	-0.0732392	-0.0716616	-0.0720372	-0.0713852	-0.0714106	-0.0723681	-0.0719338	-0.070381
O15091	PRORP	-0.173623	-0.206819	-0.161232	-0.0960062	0.0688887	0.00146623	0.188084	0.0617239	-0.222258	0.0321514	0.0356573	0.0540374	-0.389402	-0.612994	-0.475034	-0.23329	-0.0278959	-0.285115	-0.317129	-0.64625	-0.837238	-0.989326	-0.0721593	-0.128666	-0.27114	0.198093	-0.278602	-0.0849267	0.0690389	0.627604	0.658091	0.213111	0.204093	-0.0788651	-0.0164046	0.0113626	0.0521539	0.114801	-0.231042	-0.171208	-0.411854	-0.147005	-0.169392	-0.152681	0.0406673	-0.335136	-0.375501	0.00377069
O15111	CHUK	-0.128152	-0.198579	-0.175569	-0.0808557	-0.0907495	-0.195148	-0.32086	0.0450519	-0.0519255	-0.0330109	-0.00869161	-0.0242619	-0.157338	-0.053695	-0.136546	-0.223248	-0.231545	-0.260592	-0.0892841	-0.24065	-0.199282	-0.268284	-0.0401397	-0.0574209	-0.207865	0.185276	-0.227738	-0.239189	-0.0127918	-0.15509	-0.31946	0.0808407	-0.136388	-0.267488	-0.150905	-0.215868	-0.215052	-0.257526	-0.22116	-0.175432	-0.0823634	-0.351749	-0.235432	-0.202228	-0.40544	-0.0467501	-0.0780284	-0.135034
O15116	LSM1	0.241842	0.0353136	0.426491	0.0544786	-0.0235215	0.359507	0.54625	0.292036	0.349455	0.480156	0.259164	0.11755	0.482305	0.272307	0.309856	0.343087	0.453224	0.68405	0.357676	0.284518	0.434078	0.544495	0.250074	0.158972	0.63275	0.47663	0.227379	0.490508	0.369842	-0.0735896	-0.0478681	-0.000146873	-0.0188284	0.324116	0.195193	0.0674486	0.195198	0.263527	0.189595	0.111719	0.0786484	0.165911	0.298839	0.328985	0.123172	0.21763	-0.105507	0.199795
O15118	NPC1	-0.071341	-0.0714452	-0.0705412	-0.0720964	0.0749091	-0.377567	0.00128523	0.682916	0.346767	0.162513	0.352603	-0.115815	-0.0762391	-0.0173995	-0.061253	-0.0557474	0.0797952	0.108877	0.0596886	0.184976	0.101674	0.42544	-0.00399853	0.034653	-0.0187872	-0.156969	-0.321288	-0.326985	0.00701688	0.0864703	-0.0612147	0.0999577	-0.0102938	0.00289156	-0.244624	0.34842	0.164125	-0.12053	0.228052	-0.146941	0.0177933	-0.103209	-0.209024	0.320011	-0.121607	0.497273	0.497719	-0.070381
O15120	AGPAT2	-0.429518	-0.477399	0.00882455	-0.165934	-0.117032	0.0065953	-0.127474	-0.0456952	-0.192633	-0.0816662	0.030558	0.0205354	-0.489262	-0.440379	-0.436592	-0.190994	-0.327622	-0.122901	-0.263489	-0.377523	-0.15394	0.468125	-0.443354	0.167435	0.381951	0.0462692	-0.46897	-0.366331	-0.0641022	0.158364	-0.197153	0.54232	0.118307	-0.25587	-0.327051	-0.0301599	-0.185838	-0.0501251	0.0929725	-0.0605274	0.14967	0.061558	-0.0847237	-0.646671	-0.470332	-0.327252	-0.207606	-0.0140474
O15131	KPNA5	0.21448	0.460498	0.272775	0.332546	-0.168627	0.0348506	-0.105066	0.00445178	-0.00309863	-0.120666	-0.0983683	-0.145856	0.0753066	0.0778212	0.0658775	-0.000406226	0.0710057	0.0843069	-0.0126308	-0.12546	-0.00184534	-0.266831	-0.0171575	0.132711	0.330004	0.122363	0.0958371	0.151633	-0.0803204	-0.0165924	0.0832469	0.120788	0.137555	0.0533569	-0.0207376	0.0868938	-0.285916	0.189983	0.0364816	0.048429	0.0545574	0.138532	-0.0352443	0.383728	-0.0395057	0.110671	-0.123759	0.169014
O15143	ARPC1B	-0.116145	-0.12576	0.186835	0.0290032	0.213867	0.199437	0.442363	0.127295	0.2336	0.553593	0.26254	0.667133	-0.0273384	0.105372	0.185962	0.245544	0.412157	0.655676	0.39489	0.588228	0.429759	0.767212	0.0687309	-0.0518285	0.0917084	0.0833892	-0.291692	-0.0887747	0.25969	0.278987	0.331706	0.37824	0.357689	0.492991	0.334286	-0.021064	0.450492	0.177121	0.275515	0.0968384	0.215981	0.10625	-0.464493	-0.260896	-0.23699	0.0169714	-0.0929534	0.125947
O15144	ARPC2	0.146506	0.0396579	0.232129	0.0806835	0.195364	0.280576	0.432759	0.268468	0.141332	0.261058	0.11426	0.498175	-0.0855469	-0.0987361	0.0463376	-0.313508	-0.05984	-0.0274663	-0.154895	0.206616	0.224065	0.326209	0.112586	-0.177272	-0.0722912	-0.0543827	-0.0365288	0.0541003	0.59299	-0.216849	-0.0696571	0.0325335	-0.086532	0.247204	0.0954957	-0.179956	0.0899547	-0.0518885	-0.043918	0.140784	0.0873281	0.162317	0.0184303	0.08842	0.284129	0.224284	0.257258	0.0133124
O15145	ARPC3	0.324349	0.227536	-0.335312	0.425577	0.167453	0.0593585	0.047341	0.119517	0.143289	0.159731	0.149898	0.529813	0.22895	0.209933	0.480276	0.172093	0.379632	0.482672	0.36998	0.537398	0.378122	0.583203	0.427265	-0.0518285	-0.203413	0.331047	0.235172	0.188001	0.666683	0.213802	0.335627	0.445997	0.331013	0.321489	0.286079	0.228021	0.382859	0.227385	0.400843	0.267351	-0.0409213	0.308122	-0.25274	0.317996	0.544557	0.0113093	0.616811	0.295115
O15160	POLR1C	-0.381353	-0.319148	-0.310913	-0.378213	0.465562	0.147234	0.284341	0.0493583	0.380694	0.450031	0.138673	0.160951	-0.0812386	-0.198809	-0.201041	-0.448605	-0.0541192	0.0607947	-0.014383	0.103875	0.524817	0.319336	0.131153	0.375027	0.364629	0.473727	-0.448803	-0.126174	-0.856243	0.235075	-0.0403449	0.166673	0.207378	0.308332	0.470313	-0.100333	0.192554	0.0270706	0.155145	0.256687	-0.154082	-0.00936955	-0.275839	-0.313522	-0.392344	-0.329153	-0.279027	0.0883218
O15162	PLSCR1	-0.0346497	0.244506	-0.0435172	0.268365	0.0452163	-0.108322	0.0471635	-0.133714	0.0294771	0.218116	0.0861523	0.0967722	-0.0675108	-0.0897474	-0.0701691	0.0759146	-0.0286134	-0.0353296	0.0708868	-0.025119	-0.188385	0.0794451	-0.180439	0.0813944	0.0290398	0.34554	-0.0152802	0.0524432	0.374521	0.101048	0.0481628	0.0807982	-0.00509103	-0.00344251	0.0134275	-0.0952131	0.0636807	0.0129806	0.126718	-0.0213145	0.985824	-0.189425	0.142726	-0.2138	-0.13318	0.0386416	-0.0503236	-0.00666177
O15173	PGRMC2	0.102845	0.144846	0.0177328	0.353669	0.367168	0.16102	0.514226	0.654115	-0.264026	0.172147	0.529153	0.310612	0.140443	0.512282	0.0728288	0.417301	0.158013	0.274323	-0.182173	0.345634	-0.0134213	0.126257	0.278473	-0.565016	-0.216788	-0.0694458	0.382	-0.0615478	0.0581014	0.370021	-0.113689	0.624191	0.314518	0.200259	0.174846	0.437455	0.20521	0.382354	0.621252	0.0405551	0.498878	0.420864	0.135754	0.2944	0.329441	0.261916	0.469629	-0.0944455
O15212	PFDN6	-0.199959	-0.361763	-0.567936	-0.283656	0.126805	-0.00654759	0.142987	-1.15768	0.115749	-0.0391097	0.0599805	0.105244	0.169639	-0.0313537	0.0658775	0.0836107	0.160359	0.240094	0.210674	0.19137	0.1631	0.174914	0.090698	0.343736	-0.091601	0.357601	0.171821	0.110967	0.0888258	0.0934291	0.0256631	0.143183	0.0848142	0.135095	-0.141484	0.155796	0.217647	0.0570423	-0.217742	0.282676	-1.2384	-0.933779	-1.42953	-0.163767	0.098851	-1.00522	-0.0407566	-0.130561
O15213	WDR46	0.264269	0.0500433	0.212512	0.0387436	-0.157892	-0.382527	-0.134836	-0.198119	0.0591707	-0.0675572	-0.0591196	-0.323323	-0.179656	-0.17433	-0.236585	0.046765	-0.120527	-0.0948183	-0.182053	-0.0724014	-0.0253255	0.112568	-0.697781	-0.326911	0.174428	-0.252764	-0.0836456	-0.108498	-0.154027	0.0293592	-0.101805	-0.06135	-0.0639288	-0.148502	-0.127932	-0.297412	-0.115595	-0.000735539	-0.0666402	0.106945	0.0167099	-0.201329	0.0130597	-0.194403	-0.468203	-0.0595314	-0.267039	0.188489
O15226	NKRF	0.356595	0.406808	0.212037	0.143821	1.04979	0.263308	0.514226	0.00540685	0.159005	0.149806	0.296293	0.0701757	0.131684	0.01172	0.00224642	0.142319	0.102559	0.136921	0.0220739	0.0169452	0.109739	-0.104422	0.171268	0.371954	0.0932269	0.211955	0.157415	0.148503	0.150806	0.136066	0.174908	0.312171	0.173951	0.0532489	0.106496	-0.0139877	0.121965	0.0733861	0.0918488	0.24706	0.0961743	0.13034	0.196055	-0.066008	-0.229669	0.00595402	-0.0590116	0.352261
O15230	LAMA5	-0.255264	-0.306248	-0.434181	-0.406101	-0.663255	-0.966724	-0.859977	-0.17882	-0.77346	-0.740355	-0.737742	0.0589138	-0.652634	-0.120273	-0.323237	-0.495437	-0.532551	-0.524065	-0.235808	-0.111529	-0.0149174	0.191537	-0.455816	-0.324266	0.0328104	-0.603869	-0.72865	-0.92007	-0.841608	-0.598103	-0.334775	-0.805175	-0.748874	-0.376832	-0.0792783	-0.805576	-0.204843	-0.186456	-0.166156	-0.401822	-0.311973	-0.262158	-0.47562	-0.437623	-0.402522	-0.463574	-0.280496	-0.296801
O15240	VGF	-0.071341	-0.0714452	-0.0705412	-0.0720964	-0.0721662	-0.0722391	-0.0722065	-0.0726154	-0.0718019	-0.0710434	-0.072789	-0.0713537	-0.0705533	-0.0704325	-0.0710548	-0.549092	-0.449667	-0.37288	-0.540968	-0.0705648	-0.0705155	-0.0709777	-0.0720632	-0.072483	-0.0735226	-0.0722858	-0.0666033	-0.0683238	-0.0740938	-0.0712652	-0.0701293	-0.0708997	-0.0700396	-0.0667255	-0.0654228	-0.0757322	-0.0653662	-0.0710484	-0.072427	-0.0696482	-0.0732392	-0.0716616	-0.0720372	-0.0713852	-0.0714106	-0.0723681	-0.0719338	-0.070381
O15247	CLIC2	0.206313	0.0326081	-0.731162	-0.48912	-0.663255	-0.723419	-0.675296	-0.0652999	-0.233512	-0.379402	-0.162201	-0.0925633	-0.415102	-0.608267	-0.600286	-0.549092	-0.487223	-0.28251	-0.505408	-0.855807	-0.878933	-0.894003	-0.64183	-0.334359	0.0266745	-0.30212	-0.73223	-0.577246	0.167445	-0.18118	-0.576003	-0.508464	-0.753754	-0.276105	-0.264459	-0.078158	-0.0932706	-0.938007	-0.312344	-0.0696482	-0.0732392	-0.0716616	-0.402022	-0.292378	-0.475376	-0.00138574	-0.366941	-0.0477443
O15254	ACOX3	-0.071341	-0.0714452	-0.0705412	-0.0720964	-0.0721662	-0.0722391	-0.0722065	-0.0726154	-0.0718019	-0.0710434	-0.072789	-0.0713537	-0.0705533	-0.0704325	-0.0710548	-0.0713588	-0.0713768	-0.0722234	-0.0711924	-0.0705648	-0.0705155	-0.0709777	-0.0720632	-0.072483	-0.0735226	-0.0722858	-0.0666033	-0.0683238	-0.0740938	-0.0712652	-0.0701293	-0.0708997	-0.0700396	-0.0667255	-0.0654228	-0.0757322	-0.0653662	-0.0710484	-0.072427	-0.0696482	-0.0732392	-0.0716616	-0.0720372	-0.812302	-0.0714106	-0.0723681	-0.0719338	-0.070381
O15260	SURF4	-0.118216	0.00667099	-0.235066	0.0846488	0.0432902	-0.182162	-0.257853	0.00722424	-0.566996	0.0377882	0.0375949	0.156301	-0.089271	0.181193	0.0149899	-0.375388	-0.129558	-0.119431	-0.517865	-0.344952	-0.12307	0.0330323	0.10816	-0.103295	0.0422881	-0.106987	-0.182574	0.152604	-0.109137	0.0702273	0.076263	-0.249677	0.214199	-0.074882	-0.128989	-0.25611	-0.252001	-0.0845701	-0.225322	0.0260962	0.0258294	0.239966	0.146722	0.278361	0.598738	-0.335717	-0.339165	-0.0353393
O15269	SPTLC1	0.053861	0.248415	0.375453	0.00403327	0.159733	0.121811	0.12569	0.171548	0.179086	0.211899	0.126541	0.180509	0.122447	0.0189154	0.0812595	0.120651	0.127164	0.0638444	0.104765	0.232111	0.0602592	0.00229133	0.201962	0.0188172	-0.21578	0.131552	0.0398775	0.180577	0.0202428	0.2035	0.0436072	0.183387	0.165207	0.0201836	0.00760822	-0.0642226	0.0911977	0.11461	-0.0358618	-0.0664823	0.20326	0.0585809	-0.0282426	0.025752	-0.0529569	0.00792109	0.263176	0.111778
O15270	SPTLC2	-0.154258	-0.321218	0.0918569	-0.0977876	0.262879	0.119574	0.308224	0.160302	0.264849	0.0880259	0.327581	0.248666	-0.0021917	-0.0910119	-0.192944	0.112691	0.0246715	0.125142	0.078403	-0.0878641	-0.138454	-0.273085	0.399744	0.0334776	0.264019	0.540794	-0.0421634	0.0388	-0.0275295	0.0838419	0.00644445	0.197841	-0.0608685	-0.00461308	0.0405312	0.00985718	0.154525	0.202367	0.241656	-0.0945223	-0.125315	-0.078925	-0.0469176	-0.0116731	-0.00117625	-0.00618859	0.216286	0.0594327
O15294	OGT	0.0237788	-0.134059	-0.0735798	-0.225346	0.131512	-0.0680652	-0.0210797	-0.00495448	-0.0307292	-0.152263	-0.0247751	-0.260931	-0.40375	-0.46419	-0.42353	-0.164199	0.0164131	-0.110341	-0.0191247	0.0532753	-0.356605	-0.376418	-0.0902077	0.0450269	0.5104	-0.000843394	-0.242914	-0.221709	-0.165444	-0.178536	-0.148792	-0.119122	-0.250899	-0.0607747	-0.0279931	0.209455	0.189862	-0.11518	0.0875591	-0.864691	-1.12675	-0.82311	-0.0501018	0.0401766	-0.424529	-0.287031	-0.272317	-0.196452
O15305	PMM2	-0.111523	-0.0239461	-0.06633	0.146933	0.0107377	0.0659158	0.205635	0.196129	-0.0103491	0.0190958	-0.0120316	-0.033994	0.0551068	0.0327303	0.0199542	0.0940737	0.0839711	0.0782666	0.0069815	-0.0525458	-0.0391429	-0.155305	0.0958542	0.0213393	-0.0363936	0.0969543	0.116905	-0.0605042	0.0547513	0.118267	0.124829	0.0847908	0.0538691	-0.0198234	0.0527905	-0.0351329	0.0220132	0.0590332	-0.0153995	0.0181909	0.217085	-0.073588	-0.278414	-0.122975	0.0943636	0.18063	0.251732	-0.0752213
O15321	TM9SF1	0.0167044	0.00709326	-0.0334724	0.0465368	-0.186373	0.0158034	0.00417642	0.0741782	0.0669089	-0.0466792	0.0782059	-0.0385421	0.272973	0.162241	0.175157	0.0484599	0.0491041	-0.0123907	-0.0361841	-0.0174729	0.114123	-0.0482976	0.226707	0.222855	0.0939801	0.1345	0.135943	0.137692	0.20501	0.0278364	0.0797198	-0.0227911	0.274659	0.0199487	0.156688	0.0513477	0.106334	0.00327428	0.130008	0.0686187	0.151615	0.0359988	0.0782901	-0.104157	-0.0654374	0.215686	0.250414	0.0318745
O15327	INPP4B	0.00243209	-0.0189241	0.0871705	0.33494	-0.0793233	-0.0833286	-0.239451	0.420776	0.0303019	0.130034	0.0730627	0.0402328	-0.262205	-0.0634446	-0.331308	-0.0433818	0.0346584	0.055039	-0.00310028	0.0652337	0.0888394	0.0341486	0.122529	0.168027	0.0166699	0.294487	-0.0213417	-0.0305964	0.0146452	0.136271	0.00251807	0.117214	0.0279375	-0.027959	0.0281879	-0.0552947	0.0910782	0.0134014	0.132926	-0.130821	0.131535	-0.0186927	0.128647	-0.0302239	0.0337779	0.232394	0.122755	0.115111
O15355	PPM1G	-0.071341	-0.0714452	-0.0705412	-0.0720964	-0.0721662	-0.0722391	-0.0722065	-0.0726154	0.282122	0.394075	0.163979	0.43344	-0.0705533	-0.547583	-0.0710548	-0.178606	-0.22201	-0.118004	-0.231476	-0.0213467	0.0422446	-0.130822	-0.0190789	-0.1613	0.641261	0.0697747	0.183341	0.435206	0.0921	-0.043465	0.145738	0.0889208	0.123281	0.178677	0.582374	0.0628369	0.123645	-0.00441763	-0.115716	0.586516	0.0964735	-0.0861578	-0.317057	0.513512	-0.0714106	-0.0723681	-0.0719338	-0.070381
O15357	INPPL1	-0.123378	-0.224585	-0.150699	-0.0274022	-0.109717	-0.0938385	0.0986798	-0.0900463	-0.53152	-0.268187	-0.467379	0.0756358	-0.771518	-1.33109	-1.05389	-0.276682	-0.034117	-0.378746	-0.18041	-0.397494	-0.565287	-0.552465	-0.737242	-0.246196	-0.18372	0.0145353	-0.389267	-0.224974	-0.063344	0.341337	-0.110081	-0.0105183	-0.0319812	-0.183303	-0.0595357	0.105102	0.123699	-0.113228	0.126451	-0.522202	-0.2369	-0.430647	-0.555706	-0.0713852	-0.259485	-0.0833722	-0.269298	0.0503252
O15371	EIF3D	0.368179	0.278938	0.353689	0.203083	0.0675793	0.294061	0.205209	0.397134	0.113157	0.230501	0.219471	0.423433	0.348979	0.269922	0.274167	0.135014	0.218566	0.147263	0.159672	0.364538	0.240104	0.210482	0.538255	0.383473	0.0354894	0.382663	0.168584	0.269851	0.147777	0.108412	0.168964	0.442921	0.238629	0.208446	0.259767	0.170867	0.242614	0.313696	0.454031	0.237469	0.245579	0.178847	0.321134	0.327628	0.123172	-0.0643668	0.208502	0.313388
O15372	EIF3H	0.259763	0.142293	0.229554	0.148444	0.401081	0.483942	0.419578	0.116953	0.333329	0.270133	0.388951	0.20677	0.469328	0.485626	0.175979	0.333265	0.41869	0.247228	0.339755	-0.144384	-0.118463	-0.246548	0.56052	0.493731	0.0247927	0.291054	0.391963	0.500001	0.257366	-0.0402794	-0.0225096	0.193276	0.171519	0.287221	0.307484	0.372156	0.133845	0.342342	0.307439	0.541232	0.234845	0.462359	0.326803	0.695024	0.117975	-0.161452	0.447628	0.219963
O15382	BCAT2	-0.071341	-0.0714452	-0.0705412	-0.0720964	-0.0721662	-0.0722391	-0.0722065	-0.0726154	-0.743586	-1.08972	-0.903318	-1.12558	-0.0705533	-0.0704325	-0.0710548	-0.0713588	-0.0713768	-0.0722234	-0.0711924	-0.0705648	-0.0705155	-0.0709777	-0.0720632	-0.072483	-0.0735226	-0.0722858	-0.0666033	-0.0683238	-0.0740938	-0.0712652	-0.0701293	-0.0708997	-0.0700396	-0.0667255	-0.0654228	-0.0757322	-0.0653662	-0.0710484	-0.072427	-0.0696482	-0.0732392	-0.0716616	-0.0720372	-0.0713852	-0.0714106	-0.0723681	-0.0719338	-0.070381
O15400	STX7	0.461927	0.748087	0.103934	0.848224	0.605946	0.741884	0.698705	-0.12468	0.45013	1.90946	0.407866	0.747787	0.594292	0.68007	0.482664	0.605082	1.11817	0.301456	0.735392	0.837099	0.379352	0.92255	0.618808	1.1244	1.18934	0.4607	0.892845	0.176169	0.474479	0.473441	1.0632	0.238198	0.893936	1.66809	0.0292024	0.147545	1.03142	1.33167	0.567363	0.779587	-0.0694296	0.80606	0.423073	0.658341	1.35145	-0.114184	0.310413	0.706363
O15439	ABCC4	-0.071341	-0.0714452	-0.0705412	-0.0720964	-0.0721662	-0.0722391	-0.0722065	-0.0726154	-0.0718019	-0.0710434	-0.072789	-0.0713537	-0.0705533	-0.0704325	-0.0710548	-0.0713588	-0.0713768	-0.0722234	-0.0711924	-0.0705648	-0.0705155	-0.0709777	-0.0720632	-0.072483	-0.0735226	-0.0722858	-0.663947	-0.68695	-0.760688	-0.0712652	-0.0701293	-0.0708997	-0.0700396	-0.0667255	-0.0654228	-0.0757322	-0.0653662	-0.0710484	-0.072427	-0.0696482	-0.0732392	-0.0716616	-0.0720372	-0.0713852	-0.0714106	-0.0723681	-0.0719338	-0.070381
O15455	TLR3	0.0388374	0.314091	0.0747452	0.219765	-0.00559057	0.0590993	0.0725721	-0.136673	0.0697791	-0.0722115	0.394008	-0.063749	0.0773639	-0.0384565	-0.0854559	0.332435	-0.0242775	0.00877652	0.192023	0.603038	-0.0940798	0.560615	-0.271697	-0.0682979	0.229313	0.20894	-0.145759	-0.00508321	-0.0872046	-0.191426	-0.13947	-0.252281	-0.512766	-0.101619	0.097179	-0.184751	-0.0621006	-0.00821925	0.182609	-0.393333	0.505412	-0.075493	-0.146044	-0.161003	0.0322114	0.225461	0.100701	0.371997
O15484	CAPN5	-0.443718	-0.362588	-0.757867	-0.480373	-0.372197	-0.346373	-0.354464	-0.0236691	-0.435561	-0.325434	-0.460795	-0.0442713	-0.656483	-0.427845	-0.457926	-0.691995	-0.340323	-0.711865	-0.108261	-0.239626	-0.12307	-0.00122844	-0.438201	-1.1761	-0.122733	-0.439058	-0.596789	-0.488287	-0.526378	-0.391244	-0.47141	-0.127114	-0.711458	-0.37923	-0.375761	-0.0400407	-0.363338	-0.700917	-0.241968	-0.467969	0.00364325	-0.10934	-1.01449	0.0377492	0.0363522	0.130096	0.125889	-0.598273
O15488	GYG2	0.385757	0.713186	0.506048	-0.0977876	0.47863	0.390338	0.531388	0.365819	0.476547	0.32508	0.904391	0.150708	0.143967	0.281867	0.438128	0.313841	0.354941	0.283184	0.223802	-0.0489157	-0.283425	0.072338	0.287538	0.323216	0.490674	0.17411	0.142503	0.660801	0.001383	0.140388	0.159648	0.387525	0.0974711	0.427259	0.319879	0.247985	0.124451	0.301231	0.122541	0.172412	0.198553	0.631538	0.203087	0.178772	0.853948	0.506327	0.272642	0.260539
O15498	YKT6	-0.106495	-0.026634	-0.143568	0.0463661	0.366133	0.237867	0.435838	0.428091	-0.0303242	0.0481559	-0.00749264	0.311986	0.0504525	0.017395	0.231913	0.419829	0.400333	0.551183	0.522184	0.127563	0.0237423	0.227489	0.0718701	0.187631	0.123343	0.738345	0.0875832	0.125344	0.306248	0.0958599	0.121649	0.171335	0.0357123	0.21819	0.0192565	0.428897	0.151242	0.198862	0.201335	0.124095	0.290794	0.343345	0.112969	0.272133	0.260659	0.222421	0.173208	0.216559
O15511	ARPC5	-0.0931629	-0.0514922	0.0331994	0.132813	0.541202	0.446314	0.79064	0.221069	0.022108	0.124931	-0.0816183	0.394176	0.0369033	-0.131232	0.0707668	0.196056	0.40259	0.482672	0.308222	0.0645404	0.0193828	0.266748	0.188847	0.0724176	0.0112057	0.104174	0.0386211	0.121005	0.631727	-0.116942	-0.0702193	-0.0598227	0.042156	0.14796	-0.0555317	-0.235357	0.0771871	0.146515	-0.141925	-0.0700383	0.162247	0.00511086	0.0441243	0.0841524	0.306309	0.107614	0.34636	0.158745
O15514	POLR2D	0.397213	0.182942	0.0502822	0.18171	-0.236018	0.164024	0.141591	-0.136814	0.184526	0.097493	0.122896	0.165122	0.0819068	0.257423	0.130326	0.0956964	0.11609	0.0564508	0.0656693	0.055602	0.203929	-0.0868836	0.246741	0.0159704	0.156805	0.161537	0.108809	0.151233	0.0813176	0.171519	0.0623774	0.18751	0.247611	0.0769576	0.408093	0.320774	0.285498	0.307763	0.19571	0.00742156	0.149271	-0.0424754	-0.0852992	0.0225303	-0.0986619	0.0432671	0.0610624	0.0174061
O15533	TAPBP	-0.0123931	0.159033	-0.339421	0.240978	0.0194149	-0.155024	0.00709795	0.559748	-0.0980509	-0.00735544	-0.191807	0.646238	0.180741	-0.0491377	0.050753	-0.0891949	-0.00622182	0.011877	0.808412	-0.21774	-0.0790629	1.04601	-0.0663008	-0.14195	-0.099634	0.499407	-0.368901	-0.379911	0.955623	0.182485	-0.0252389	-0.109289	-0.223842	0.192527	-0.115611	1.17798	-0.266332	-0.425564	0.413217	-0.469698	1.42957	-0.103454	0.00863332	-0.0479622	0.300052	1.90946	1.12337	0.0874687
O15537	RS1	-2.31808	-2.28646	-2.4174	-2.35702	-1.55167	-1.74914	-1.59408	-1.74961	-2.5409	-2.50456	-2.58976	-2.38756	-1.6111	-2.12182	-1.88845	-1.95033	-2.20903	-2.28744	-2.28817	-2.15663	-3.10569	-3.10569	-2.52104	-2.396	-2.48562	-2.39439	-1.89054	-1.65119	-1.81031	-1.97243	-2.55597	-2.27625	-2.33253	-1.66408	-1.88263	-0.0372539	-2.15237	-2.19071	-2.37486	-2.27213	-2.4377	-2.47794	-1.93752	-2.37474	-2.37215	-2.21989	-2.08324	-2.38335
O15540	FABP7	-0.071341	-0.0714452	-0.0705412	-0.0720964	-0.0721662	-0.0722391	-0.0722065	-0.0726154	-0.0718019	-0.0710434	-0.072789	-0.0713537	-0.0705533	-0.0704325	-0.0710548	-0.0713588	-0.0713768	-0.0722234	-0.0711924	-0.0705648	-0.0705155	-0.0709777	-0.0720632	-0.072483	-0.0735226	-0.0722858	-0.0666033	-0.0683238	-0.0740938	-0.0712652	-0.0701293	-0.0708997	-0.0700396	-0.832722	-1.01904	1.22464	-1.20403	-0.0710484	-0.072427	-0.0696482	-0.0732392	-0.0716616	-0.0720372	-0.0713852	-0.0714106	-0.0723681	-0.0719338	-0.070381
O43143	DHX15	0.319987	0.100217	0.0352081	0.172921	0.167453	-0.00555557	0.0518527	0.116953	0.156301	0.148322	0.322988	-0.0143305	0.142124	0.263562	0.167518	0.0186136	0.216165	0.0263931	-0.0595343	0.247838	0.27413	0.120003	0.260242	0.171057	-0.00435399	0.158584	0.147212	0.354796	0.247415	0.023386	0.157311	-0.269868	0.142586	0.0277499	0.232	0.254897	0.378288	0.174594	0.167552	0.222466	0.298913	0.085553	0.0332488	0.160705	-0.0585638	0.195323	0.0753044	0.134056
O43149	ZZEF1	-0.110643	-0.132204	0.144599	-0.137672	-0.0699179	0.00780789	0.126786	-0.0462764	-0.134124	-0.241627	-0.0923958	-0.146727	-0.148419	-0.157474	-0.201041	-0.306431	-0.379646	-0.493097	-0.0709819	-0.242724	-0.245706	-0.0930047	-0.341173	-0.00158593	-0.0742688	-0.0906242	-0.154978	-0.0630353	0.0940166	-0.137007	-0.119048	0.0593697	-0.185779	-0.367405	-0.254859	-0.215302	-0.0603647	-0.462606	-0.203957	-0.331303	-0.119253	-0.379237	-0.273018	-0.0331158	-0.163742	0.0596636	0.133105	0.0324055
O43150	ASAP2	-0.133586	-0.00130081	0.328584	-0.128822	-0.0607217	-0.00119198	0.131903	-0.2251	0.0194871	-0.0308378	0.0587055	-0.0673184	-0.0389445	-0.020609	-0.128664	0.00340545	0.0362465	-0.0346654	0.0571742	0.00105279	0.00389271	-0.152329	-0.331749	-0.00616363	-0.230229	-0.461445	-0.18381	-0.128265	-0.13336	-0.409331	-0.088982	-0.0262311	0.0170315	-0.0246854	-0.187959	0.477533	0.00299491	0.194652	-0.0997445	0.133683	0.0173943	-0.203621	0.0643962	-0.253841	0.183484	-0.236873	-0.155349	0.161113
O43156	TTI1	-0.071341	-0.0714452	-0.0705412	-0.0720964	-0.0721662	-0.0722391	-0.0722065	-0.0726154	-0.0718019	-0.0710434	-0.072789	-0.0713537	-0.0705533	-0.0704325	-0.0710548	0.0168895	-0.051907	0.17626	-0.0403168	-0.0705648	-0.0705155	-0.0709777	-0.0720632	-0.072483	-0.0735226	-0.0722858	-0.0666033	-0.0683238	-0.0740938	-0.0712652	-0.0701293	-0.0708997	-0.0700396	-0.0667255	-0.0654228	-0.0757322	-0.0653662	-0.0710484	-0.072427	-0.0696482	-0.0732392	-0.0716616	-0.0720372	-0.0713852	-0.0714106	-0.0723681	-0.0719338	-0.070381
O43157	PLXNB1	0.45851	0.810894	0.655987	0.127779	0.226894	0.445499	0.166772	0.0160194	0.0856214	0.0625097	-0.060657	-0.979587	0.457096	0.293038	0.629466	0.285251	1.02238	0.352586	-0.131436	0.000600869	0.525383	0.364896	0.462519	-0.0963912	0.5036	-0.171656	0.418594	0.226893	0.0409708	-0.359368	0.167997	0.37824	0.410997	0.339679	-0.181413	-0.312932	0.703019	1.08987	0.0731732	0.09567	-0.195044	-0.163085	0.6005	-0.0785385	0.217307	-0.389205	-0.201346	-0.0577202
O43169	CYB5B	-0.245886	-0.0306728	0.0414325	0.24858	0.00311771	0.148568	0.198887	0.525663	0.00397401	0.154489	0.0882951	0.272432	0.1009	-0.075107	0.107596	0.217079	0.13855	0.123598	0.572058	-0.259684	-0.116803	-0.242888	-0.186112	0.0589458	0.343766	0.0967686	0.185747	0.00510897	-0.038482	-0.19392	-0.0969523	-0.0218536	-0.163452	0.163717	-0.246972	0.676955	-0.0430648	0.139184	-0.00695282	-0.365122	0.11307	0.378233	-0.0272373	-0.4179	0.602775	0.289955	-0.0395175	0.133004
O43172	PRPF4	0.0968711	-0.131288	-0.257261	0.0929	0.0459107	-0.125821	-0.276499	0.00430543	-0.0287687	-0.0914086	-0.102804	-0.0154392	-0.0299643	-0.11764	0.0682467	-0.098858	-0.190885	-0.243681	-0.10958	0.0724329	0.217886	-0.126078	0.110295	0.304316	-0.0797794	0.326283	-0.680119	-0.604914	-0.531169	-0.00928133	0.0712991	0.124835	0.00675863	-0.233438	-0.150517	-0.0182903	-0.196285	0.0100228	0.0562497	-0.32344	-0.271024	0.221939	-0.0326819	-0.0642516	-0.0407916	-0.00138574	0.0315558	0.139784
O43175	PHGDH	0.37986	0.877064	-0.830681	-0.520448	-0.486757	0.207526	-0.749791	-0.184033	-0.959839	-0.324959	-0.859443	0.181678	-0.838382	-0.463381	-0.644999	-1.21235	-1.07594	-1.20333	-0.409806	-0.296786	-0.544577	-0.515169	-0.638971	-0.48327	0.0229491	0.615449	-0.299918	-1.31497	-0.897112	-0.512766	-0.100592	-1.10003	-0.907855	-0.482134	-1.52323	-0.792435	-0.885031	-1.17576	-0.684976	0.222466	-0.321687	-0.753349	0.107934	-0.0886779	-0.638265	-0.868721	-0.75571	-0.713758
O43181	NDUFS4	0.301067	0.0353136	0.395324	0.0729394	-0.355534	-0.16377	0.14651	0.0660234	0.210527	-0.103853	-0.419485	0.0757082	0.32841	0.238345	-0.0923813	0.143258	0.203359	0.217696	0.197508	0.311988	-0.210174	0.0394876	-0.216767	-0.19094	0.464093	0.0147047	0.344921	-0.268525	-0.0931526	0.199665	0.31393	0.00444617	0.147235	0.216051	0.296497	-0.127116	-0.0892517	0.16048	0.110906	0.119738	0.124449	0.374343	0.25864	0.0641009	0.0302664	-0.278357	-0.0178906	0.405247
O43236	SEPTIN4	-0.071341	-0.0714452	-0.0705412	-0.0720964	-0.0721662	-0.0722391	-0.0722065	-0.0726154	-0.0718019	-0.0710434	-0.072789	-0.0713537	-0.0705533	-0.0704325	-0.0710548	-0.0713588	-0.0713768	-0.0722234	-0.0711924	-0.0705648	-0.0705155	-0.0709777	-0.0720632	-0.072483	-0.0735226	-0.0722858	-0.0666033	-0.0683238	-0.0740938	-0.0712652	-0.0701293	-0.0708997	-0.0700396	-1.06038	-0.878528	0.596752	-0.866324	-0.0710484	-0.072427	-0.0696482	-0.0732392	-0.0716616	-0.0720372	-0.0713852	-0.0714106	-0.0723681	-0.0719338	-0.070381
O43237	DYNC1LI2	0.0720057	0.39936	0.14694	0.276571	0.0828512	-0.0595986	0.250291	-0.354268	0.348513	0.557382	0.146353	0.346276	0.14281	0.70688	0.590663	0.0544326	0.292265	0.0105574	0.465026	-0.0468219	0.225922	0.484882	0.302769	-0.245678	-0.334877	-0.0301705	0.241928	-0.0594219	0.0338459	0.419062	0.130321	0.182559	0.0214857	0.388246	0.0686709	0.140884	0.204228	0.303261	-0.0544007	-0.0373758	-0.232283	0.0191364	0.282232	0.0388174	0.306309	-0.0417097	-0.397217	0.0564896
O43242	PSMD3	0.136125	-0.0174298	0.0934996	0.0582456	0.165529	0.226943	0.276878	0.190571	-0.00948756	0.0861899	0.159833	0.0927247	0.150614	0.248888	0.0821977	0.275276	0.221979	-0.0266895	0.141408	-0.0105503	-0.0149174	0.0626677	0.272805	0.291214	-0.262587	0.155986	0.171821	0.287149	0.334196	-0.160978	-0.0155054	0.0976423	0.0223127	0.144899	0.256474	0.422861	0.273354	0.153602	-0.122288	0.143538	-0.154082	0.0817044	0.0954206	0.0476008	0.307204	0.26244	0.245039	0.131001
O43252	PAPSS1	0.164082	-0.318843	0.0580651	0.127779	-0.104454	-0.205631	-0.283822	-0.220098	-0.0997158	-0.139871	0.050891	-0.204853	-0.258461	-0.326841	-0.345726	-0.123886	-0.394749	-0.0624791	-0.279055	0.0192336	0.294852	-0.00969362	-0.314177	-0.240998	0.0396012	-0.139007	-0.0954767	0.0311608	0.356809	0.0782005	-0.317796	-0.0662118	-0.121673	-0.142275	0.113014	-0.131151	-0.25437	-0.279267	-0.276904	-0.0696482	-0.0732392	-0.0716616	-0.168587	-0.471573	-0.178709	-0.188963	-0.180808	0.0853481
O43264	ZW10	-0.108247	0.0368905	0.133299	-0.00606555	-0.120547	-0.265003	0.0280451	0.130966	-0.270479	-0.0960301	-0.30375	-0.369604	-0.224734	-0.0653311	-0.0983473	-0.292747	-0.220155	-0.147163	-0.310332	-0.266337	-0.536395	-0.386713	-0.381721	-0.250308	0.161643	-0.354756	-1.13926	-1.08823	-0.42918	-0.396608	-0.52387	-0.551246	-0.49477	-0.206109	-0.19049	-0.194867	-0.4579	-0.264555	-0.178964	-0.0357751	-0.219119	0.108841	-0.625921	0.106579	-0.195127	-0.0100812	-0.448862	0.07167
O43290	SART1	0.145058	-0.165584	-0.0362212	-0.202382	0.383625	0.244531	0.347488	-0.640805	-0.210088	-0.25188	-0.227663	-0.437092	0.163149	0.346544	0.577501	-0.107203	-0.288241	-0.279181	-0.600164	-0.421866	0.146021	0.0684258	0.158408	0.0839481	-0.64837	-0.115646	0.195057	0.397063	0.0416164	0.0322875	0.208657	-0.302038	0.0984749	-0.186309	-0.032661	-0.0729602	0.0258306	0.0937637	-0.252154	0.479519	-0.436291	-0.434171	-0.382838	0.156745	-0.19998	-0.625749	-0.429895	-0.267883
O43294	TGFB1I1	-0.0424009	-0.49724	-0.650615	-0.229076	-0.903215	-0.66507	-0.719384	-0.819282	0.153882	-0.00677903	0.154166	-0.223018	-0.353937	-0.275184	-0.328277	0.0696806	0.0448066	-0.109744	0.105811	-0.736493	-0.93742	-0.625588	-0.561651	-0.520318	0.349105	-0.769917	-0.092463	-0.257151	-0.121631	0.0832344	0.0787976	-0.0954117	-0.0920475	0.0474347	0.067312	-0.475685	-0.110545	-0.315653	-0.237014	-0.0600462	-0.288978	-0.277131	-0.400472	-0.849524	-0.352479	-0.364431	-0.131178	-0.554089
O43299	AP5Z1	0.160973	0.105301	0.142716	0.0770215	-0.0461955	-0.00668627	0.128693	0.0938071	0.260407	0.206974	0.272953	0.104078	0.15078	0.220366	0.168715	0.200242	0.144433	0.123598	0.0383049	0.388669	0.170811	0.381432	-0.269805	-0.34194	0.125223	-0.113244	0.0288697	0.0669488	0.175958	0.158364	-0.0289536	0.206627	-0.00585218	0.215536	0.187293	-0.24971	-0.112803	0.11095	-0.0531062	0.0866723	-0.00193894	0.0667027	0.0598036	-0.0565842	-0.185605	0.131814	-0.0373527	0.0019952
O43301	HSPA12A	0.244937	0.44692	-0.623281	-0.902763	0.0793496	-0.56055	-0.171296	-0.406978	-0.291155	-0.988149	-0.595336	-0.284543	-0.902496	-0.21521	0.161306	-0.46312	-0.134212	-1.09213	-1.28842	-0.456721	-0.536395	-0.825001	-0.197567	-0.290926	-0.419746	-1.01502	-0.423411	-0.562902	-1.31183	-1.15565	-0.347852	-0.771543	-1.1284	-0.455551	-0.737162	0.474317	0.113627	-0.627275	-1.10454	-0.816157	-1.07785	-0.644588	-0.174189	-0.936117	-0.901521	-1.26795	-0.999845	-0.3817
O43312	MTSS1	0.0608628	-0.0514922	0.0618737	0.0715045	0.137687	0.358321	0.356928	0.252849	0.194376	-0.149277	0.0271135	-0.253151	0.115105	0.0491895	0.0466627	-0.161189	-0.0933932	-0.0503424	0.148708	-0.0213372	-0.28777	-0.199431	-0.24187	-0.132844	0.475397	-0.300367	0.135863	0.130804	0.0377841	-0.162977	-0.0263227	-0.0463667	-0.0885328	0.0978879	0.329781	-0.25779	-0.0867391	-0.0182089	0.272992	-0.412089	0.281328	-0.601888	0.261046	0.699049	-0.134389	0.0801239	0.157514	0.535672
O43314	PPIP5K2	0.113292	0.124244	0.0374797	-0.0384459	0.00506032	0.0574423	0.0972264	0.0904201	0.00259268	-0.106687	-0.0531146	-0.0431978	0.104067	0.109572	0.13421	0.224555	0.0758989	0.157754	0.261448	-0.106373	-0.257883	-0.218178	-0.142045	0.315552	0.361035	0.305895	0.119043	0.190755	0.209237	0.144036	0.0960635	0.233078	0.0630065	0.228791	0.165388	-0.0282213	0.00570235	0.0312899	-0.0252445	0.0250495	0.128724	0.0783965	0.0473635	0.0717999	0.0722236	0.235469	0.312194	0.0777009
O43324	EEF1E1	0.151019	0.252145	-0.0437407	0.00521274	0.255265	0.296475	0.355506	-0.233119	0.142579	0.0203053	0.151379	-0.0658285	0.37538	-0.0292791	0.261281	0.447827	0.310684	0.281993	0.083692	0.264759	0.314148	0.12362	-0.0546475	0.407365	0.188097	0.263566	0.262523	0.25645	0.0102209	-0.0760556	0.145368	0.0457049	0.205303	-0.116515	-0.17263	-0.524806	-0.179845	-0.0359512	-0.0784007	0.147555	0.888865	-0.467462	0.255838	0.167017	0.11046	-0.0753123	-0.137882	0.326145
O43390	HNRNPR	0.161654	0.0286519	0.107869	0.245975	0.0443914	0.0990743	-0.074707	0.213207	0.04224	-0.275368	0.0974543	-0.467638	0.209828	0.455002	0.348661	-0.38097	-0.195636	-0.511891	0.000576298	-0.114113	0.156216	-0.572985	0.47452	-0.00399228	-0.480679	-0.000843394	0.0562537	0.262812	-0.0336752	-0.255827	0.193662	-0.266673	0.22663	-0.0935215	0.0568281	0.0470042	0.1367	0.101143	-0.119492	0.160774	-0.114758	-0.0049125	0.151588	-0.0683395	-0.000728317	0.0444254	0.00864212	-0.176361
O43396	TXNL1	0.187605	0.121653	0.0551572	-0.0407842	0.425157	0.271982	0.178831	0.18343	0.0389064	0.169209	0.110181	0.0861546	0.0947596	-0.106019	-0.00863778	0.00859409	0.0885417	0.214238	-0.113858	0.165831	-0.0370647	-0.438352	0.0645443	0.242888	0.013189	-0.314285	-0.122686	0.158487	-0.0829778	-0.974836	-1.18563	-0.72997	-0.822316	-0.032703	-0.515348	-0.646018	-0.309417	0.11095	-0.189252	0.214141	-0.0613473	0.189225	0.103618	-0.0971067	0.0450787	-0.0643668	-0.150372	0.223276
O43399	TPD52L2	0.437596	0.668047	0.361755	0.116877	0.925749	0.360924	0.611597	-0.410586	0.657744	0.678963	0.567524	0.032697	0.0985801	0.0743292	0.186698	0.128455	0.0936917	0.324568	0.20871	0.16755	0.0944295	-0.335733	0.271622	0.900631	0.0821941	0.146861	0.710304	0.366241	0.0323741	0.362064	0.774608	0.110924	0.550747	0.318702	0.279944	-0.105581	0.431186	0.260483	-0.157276	0.309321	-0.27632	-0.189425	0.46879	0.0959009	0.0890569	-0.295025	-0.133068	0.616867
O43427	FIBP	0.119848	0.18144	-0.0251503	0.0469262	-0.0228678	0.086492	0.195001	-0.135254	-0.214983	-0.410359	-0.201714	0.0531281	0.0769063	0.0993755	0.0715708	0.093091	0.0870311	0.114006	0.0437104	-0.00788013	-0.0410461	0.0849426	0.0545762	0.145507	-0.0261523	0.302258	0.19806	0.220427	0.14208	-0.0715734	0.033573	0.0578238	0.00603722	-7.35942e-05	0.0878805	0.0732939	0.0691531	0.0880507	0.0840183	0.0644796	-0.00458166	-0.0679651	0.100624	0.125666	0.159634	0.183156	0.118028	-0.0748571
O43432	EIF4G3	-0.137508	-0.03185	0.136485	-0.0623703	0.0337658	-0.134552	0.0961586	-0.416553	-0.248862	-0.173565	-0.189522	-0.351301	-0.440399	-0.495145	-0.477193	-0.0328816	0.161841	-0.0663963	-0.848414	-0.464224	-0.40209	-0.393883	-0.162149	0.264984	0.152876	-0.104844	-0.345489	-0.624572	-0.522032	-0.203223	-0.207097	-0.173046	-0.197625	0.214323	0.156655	-0.324747	0.324969	-0.134999	-0.00602599	0.0918569	0.0215383	-0.327784	-0.137285	-0.211428	-0.0583847	-0.538272	-0.302895	-0.0987704
O43464	HTRA2	0.116299	0.143111	0.268976	0.510996	-0.152004	0.0637035	0.279679	0.164066	-0.242017	-0.259387	-0.279227	-0.023384	0.0669652	-0.00844063	0.18156	0.346641	0.220712	0.452736	0.362571	0.188163	0.438278	0.617839	0.276659	0.0519084	0.366472	-0.145742	0.374987	0.405071	0.353084	0.0986538	0.516054	0.521918	0.473954	-0.0361232	0.194804	-0.021064	0.0728899	0.372966	0.165421	0.305055	0.377966	0.0261961	-0.123243	0.263028	0.0306855	0.432904	0.347767	0.405247
O43488	AKR7A2	0.296417	0.522796	0.0177328	0.0681976	-0.308105	0.0645716	-0.641673	0.118232	0.123415	0.0186698	0.144875	-0.0371595	0.237389	0.4453	0.269613	0.393292	0.534797	0.38432	-0.152207	0.0594932	0.13715	-0.299785	0.203745	0.014277	0.0295803	-0.297388	-0.0143033	0.217004	-0.208201	-0.138624	0.326753	0.493353	0.350662	0.112275	0.0872053	0.365024	0.208004	0.0715841	0.259801	-0.0162877	-0.370243	0.184639	-0.0175757	-0.215344	0.547614	0.0703624	0.0805508	-0.283546
O43491	EPB41L2	-0.925348	-0.914985	-1.35565	-1.37405	-1.24044	-1.12535	-1.11497	-1.32435	-1.12813	-1.57086	-0.996892	-1.41197	-1.40343	-1.23571	-0.931139	-1.2332	-1.18355	-1.45279	-1.49398	-1.12161	-0.820579	-0.688598	-1.39607	-1.23845	-0.473836	-1.40526	-1.18241	-0.907375	-1.07267	-1.82511	-1.02854	-1.84571	-1.67998	-1.07936	-1.1013	0.377585	-1.26017	-1.37598	-1.44828	-0.843158	-1.12675	-0.900637	-1.72503	-1.10664	-1.26039	-0.88434	-0.751305	-0.98238
O43504	LAMTOR5	-0.383387	-0.0686596	-0.248062	-0.193048	0.186686	0.190727	0.159206	0.179959	-0.280082	-0.538612	-0.373421	-0.200778	-0.145215	-0.44518	-0.248653	-0.00136872	0.000321942	-0.101336	0.139342	-0.223751	-0.26924	-0.372281	-0.0508	0.0278391	0.179043	-0.418041	-0.0711668	0.180838	-0.143816	0.11687	0.175394	-0.0154823	0.06639	-0.066807	0.116834	-0.28268	-0.302206	0.0732652	-0.335097	-0.546542	-0.123526	-0.0928527	0.0260205	-0.0713852	-0.106221	-0.0364732	-0.171432	-0.191498
O43583	DENR	0.703412	0.311267	0.598382	0.881446	0.115471	0.201507	0.0958074	-0.0851109	0.0404355	0.0147866	0.0228948	-0.14051	0.215993	0.103717	0.13901	0.126394	0.220922	0.0271963	-0.340707	0.10723	0.0362051	-0.0871443	0.295693	0.292285	0.237701	0.19688	0.197535	0.357905	0.210507	0.292033	0.35561	0.359309	0.38741	0.525902	0.0592808	0.0741887	0.4034	0.258572	-0.0437885	0.373299	0.0215383	0.30649	0.184382	0.088433	0.014741	-0.153385	-0.135322	0.577149
O43592	XPOT	-0.329592	-0.596543	-1.09664	-0.324985	-0.479444	-0.90787	-1.12605	-0.294589	-0.644232	-0.499063	-0.559384	-0.00133654	-0.485265	-0.572702	-0.479394	-0.347459	-0.472469	-0.314658	0.0361966	-0.456721	-0.40361	-0.404856	-0.486756	-0.140203	0.206049	-0.00272837	-0.453302	-0.187553	-0.0888092	-0.219172	-0.58896	-0.367771	-0.692788	-0.624259	-0.241815	0.555054	-0.33339	-0.916989	-0.355951	-0.532838	-0.237782	-0.728549	-0.499833	-0.224967	-0.655527	0.119355	-0.0604629	-0.260586
O43598	DNPH1	0.0491708	0.132723	0.326682	0.328493	0.794559	0.133045	0.447885	0.331405	0.291149	0.216066	0.43762	0.355319	0.380954	-0.107938	0.0309883	0.0271171	0.0257575	0.245689	0.449767	0.257267	1.03306	0.120003	0.51681	0.771111	1.32053	0.762196	0.116184	0.510677	-0.310833	0.194955	-0.0778096	0.393761	0.427299	0.368182	0.36801	0.397904	0.352688	-0.0898345	0.447924	0.153434	0.59633	0.165911	0.0871859	0.465038	0.158211	0.222421	0.31956	0.518868
O43615	TIMM44	-0.100122	-0.173417	-0.0738594	-0.101598	0.00860637	-0.00249418	-0.0954678	-0.230911	0.210527	0.177185	0.143685	-0.00133654	0.134948	0.0900295	0.0226576	-0.0646384	-0.197623	-0.212371	-0.145647	-0.0669032	0.0731334	-0.322906	0.158408	0.261545	0.182017	0.0625715	-0.00129936	0.271313	0.0980588	-0.341819	0.0267445	-0.290876	-0.227429	-0.27848	-0.109212	-0.529756	-0.249733	-0.32206	-0.374196	0.0968384	0.42178	0.374343	-0.0489114	0.0657528	-0.173151	0.0688135	-0.0813947	0.176108
O43617	TRAPPC3	-0.071341	-0.0714452	-0.0705412	-0.0720964	-0.0663722	0.0135698	-0.0698093	0.09714	-0.209219	-0.127485	-0.0800151	0.108916	-0.210762	-0.336095	-0.495252	-0.312273	-0.391217	-0.375577	-0.257061	0.131752	-0.0434323	0.111859	-0.154692	0.146184	-0.218688	-0.300367	-0.204784	-0.120413	-0.175171	-0.178239	-0.311866	-0.221906	-0.220884	-0.24452	-0.382582	-0.147787	-0.184426	-0.343964	-0.000814335	-0.441604	0.0178271	-0.163419	-0.217213	-0.0886779	-0.715715	-0.132087	-0.123764	-0.070381
O43633	CHMP2A	-0.0214664	-0.0174735	0.121072	-0.0128834	0.120648	0.14559	0.308976	-0.174903	-0.238108	-0.26936	-0.21626	-0.164132	-0.00218216	0.14184	0.0992464	0.093586	0.11178	0.0493008	0.163146	0.093907	0.245958	0.0791781	0.0938509	0.0767587	-0.0189634	-0.0694367	0.0991303	-0.0661307	-0.00668691	0.20444	0.166261	0.136218	0.108695	-0.0864756	0.0109999	-0.22767	-0.130984	-0.0613936	0.0949468	-0.0225788	0.229785	-0.00961845	-0.0273446	0.0821053	-0.248939	-0.166991	-0.110961	-0.0786925
O43660	PLRG1	-0.359698	-0.2479	0.0721011	-0.0598294	-0.0250158	-0.132745	-0.137716	-0.00405374	-0.260155	0.22728	-0.207964	-0.238108	-0.251683	-0.301184	-0.336813	-0.11729	-0.177699	-0.170029	0.131668	-0.080715	-0.160679	-0.239548	-0.359218	-0.143114	0.08424	-0.181686	-0.291692	-0.197275	0.000433202	-0.723755	-0.316091	-0.0487484	-0.679464	-0.126727	-0.108156	-0.0685148	-0.10933	-0.208655	0.0263264	-0.33132	0.0578984	-0.229964	-0.273485	-0.096426	-0.0924417	-0.293246	-0.279027	-0.0381748
O43670	ZNF207	0.456067	0.475565	0.512583	0.697598	0.409425	0.192492	0.428448	0.184749	-0.140593	0.031089	0.249379	-0.127458	0.220226	0.259687	0.275702	-0.0892116	0.0767071	0.0324907	-0.131492	0.0362508	0.257288	-0.104482	0.157561	-0.196152	-0.161913	-0.174511	0.0126263	0.172583	0.196416	0.104648	0.232268	0.202946	0.227711	0.105388	0.0713042	0.0897623	0.239993	0.123729	0.829211	-0.237965	-0.334993	-0.401565	0.0367439	0.203587	-0.207562	0.0047625	-0.147164	0.194145
O43674	NDUFB5	0.0501515	-0.0543389	-0.0217791	-0.0500284	-0.239274	-0.235655	-0.369886	-0.0374186	0.126878	-0.0179835	-0.0441741	0.126124	0.341905	0.0409858	-0.146819	0.33874	-0.20793	0.305174	0.670607	-0.0760782	-0.289542	-0.214908	-0.157405	-0.278786	0.00752517	-0.344639	-0.138063	-0.314324	-0.644417	-0.380934	-0.0968733	-0.354819	-0.227484	-0.104015	-0.104306	-0.445603	-0.163739	-0.120382	-0.288629	-0.0696482	-0.0732392	-0.0716616	0.0929351	-0.40241	-0.428029	-0.558529	-0.284201	0.42629
O43676	NDUFB3	0.252836	0.181192	0.285617	0.134995	0.370404	0.181841	-0.0313433	0.102569	-0.174315	0.0725115	-0.0395754	-0.0937132	0.151148	0.0230278	0.114565	0.056983	0.300369	0.206962	0.119855	0.117014	0.322652	0.169265	0.0732462	0.312299	0.503238	0.171118	0.598899	0.383771	0.140999	0.490235	0.653661	0.361266	0.464279	-0.32698	-0.155725	0.0590568	0.0898335	0.287529	0.331587	0.32532	0.321038	0.677292	0.552648	0.22132	0.334928	0.237326	0.251863	0.382563
O43678	NDUFA2	-0.062545	-0.0239842	-0.207293	-0.0941469	-0.248219	-0.282927	0.272394	-0.172152	0.105758	-0.358557	-0.31394	-0.193045	0.205203	-0.0292791	-0.34976	-0.0788038	-0.0416935	-0.00507544	0.035176	-0.0308732	-0.384343	-0.152035	-0.177129	-0.0890825	0.123951	0.0724626	-0.0990597	-0.358892	-0.237827	0.149352	0.203491	-0.0623167	-0.0161428	0.224038	0.282878	-0.143336	-0.0867391	-0.0351693	0.00790217	0.0137596	-0.0312199	0.284062	0.239678	-0.313151	-0.0847574	-0.513174	-0.0875738	-0.0181553
O43681	GET3	-0.312875	-0.127824	-0.29781	-0.145952	-0.08311	-0.133	0.223092	-0.4485	-0.479774	-0.425612	-0.434038	-0.301048	-0.205599	-0.168928	-0.145453	-0.164199	0.0268009	0.169082	0.0964827	-0.0788496	-0.0790629	0.0958454	0.0128263	0.0432665	-0.219697	0.383626	0.048752	0.0676396	0.102904	-0.140284	-0.086016	0.160809	-0.132323	-0.134012	-0.287137	0.213172	-0.205929	-0.0840479	-0.0208723	-0.306035	0.0964735	-0.127402	-0.0972013	-0.0422575	-0.151655	0.0766676	-0.0336933	-0.260586
O43684	BUB3	-0.223347	-0.279945	-0.108407	-0.11049	-0.180374	-0.306607	-0.111553	-0.20592	-0.140445	-0.184827	-0.0707724	-0.217356	-0.239362	-0.0507037	-0.123185	-0.189625	-0.237629	-0.3457	-0.235808	-0.0628669	-0.0176034	-0.180078	-0.0747418	0.00920193	-0.292656	0.0425381	0.116184	0.0521189	0.372694	-0.142637	-0.258377	-0.0805447	-0.223785	-0.028275	-0.106783	-0.0484602	-0.00982816	0.224038	0.375779	0.0566324	0.220172	-0.0293935	-0.0438691	-0.555648	-0.317671	0.0885331	-0.105507	-0.208135
O43707	ACTN4	0.34877	-0.0993548	0.173119	0.413652	0.658226	0.0816348	0.179782	0.282905	0.0579621	-0.0281916	0.133056	0.279435	-0.00394887	0.612971	0.361619	-0.0479984	0.0287577	-0.163401	0.287609	0.0632849	0.00281846	0.428634	0.428761	-0.229406	-0.140513	-0.115646	-0.0914012	0.305016	0.0959765	0.168424	-0.0308488	0.223178	0.219873	0.0794447	0.105763	-0.0632285	0.415472	-0.00574199	0.171398	-0.0348788	0.102722	0.0882549	-0.0692193	0.236071	0.112078	0.106677	0.265282	-0.10945
O43708	GSTZ1	-0.306881	-0.0123387	-0.285109	-0.307096	-0.310815	0.054356	-0.459054	-0.319661	-0.440307	0.0942077	-0.366104	0.0134523	-0.187578	-0.673244	-0.127047	0.200242	-0.0827765	-0.235394	-0.0807417	0.048188	-0.3176	-0.050282	-0.191201	-0.242521	0.0237995	-0.237509	0.461515	-0.466548	0.178424	0.286767	-0.108495	0.0834538	-0.0619911	0.19631	0.00361843	0.00681084	-0.0577073	-0.385221	-0.114882	-0.0976885	-0.0965679	-0.235312	-0.336656	-0.517157	0.0356319	0.46105	-0.0719338	0.441732
O43719	HTATSF1	-0.071341	-0.0714452	-0.0705412	-0.0720964	-0.282213	-0.156583	-0.161444	-0.414089	-0.1856	-0.214837	-0.288461	-0.277415	-0.318872	-0.386183	-0.484801	-0.62633	-0.449667	-0.474895	-0.958018	-0.893254	-0.419963	-1.08574	-0.293475	-0.242253	-0.0487219	-0.224851	-0.173995	-0.0221917	0.047786	-0.37085	-0.430269	-0.199176	-0.305892	-0.7256	-0.475685	-0.801407	-0.642169	-0.718868	-0.975955	-0.334115	-0.379457	-0.538897	-0.728455	-0.0112219	-0.0385317	0.0107757	0.0809002	-0.070381
O43747	AP1G1	-0.312071	-0.220113	-0.13365	0.0278374	-0.128802	-0.168779	-0.228903	0.0710599	-0.36458	-0.288873	-0.235518	-0.0554804	-0.246558	-0.369226	-0.31254	-0.122445	-0.106325	-0.0339277	0.0345807	-0.35822	-0.173528	-0.166682	-0.121105	-0.127815	-0.067697	-0.0370415	0.053639	-0.0146384	0.0888258	-0.0883988	-0.166021	-0.135945	-0.238631	-0.178784	-0.289305	-0.453379	-0.146243	-0.0615719	-0.361126	-0.290936	-0.290567	-0.209107	-0.108173	-0.400373	0.102941	0.100298	-0.247391	-0.191498
O43752	STX6	-0.131493	0.0568195	0.11224	-0.0793073	0.0763901	-0.217549	-0.151091	-0.107268	-0.314285	0.0776779	-0.412281	0.00225323	0.0831713	0.137837	0.228463	0.179342	0.23284	0.0665439	0.386772	0.419626	0.399076	0.72129	0.879731	1.44255	0.0821941	0.426477	0.674574	-0.0834521	0.176233	0.123716	0.222534	0.157311	0.278987	0.446034	0.580089	0.542527	0.810719	0.562505	0.332179	0.421039	0.208026	0.561575	0.292783	0.808521	0.580648	0.452278	0.514893	0.234837
O43760	SYNGR2	-0.172566	0.0374889	-0.387372	-0.107387	0.181668	-0.363759	-0.375179	0.417244	-0.151048	0.101462	-0.0694025	0.211038	-0.173333	-0.0312705	-0.0881316	-0.0463599	0.00363211	0.0660882	0.0556085	0.0291005	-0.0607792	0.178942	-0.138834	0.0770412	0.173663	0.147524	-0.0455664	-0.0278297	0.281129	-0.119357	0.053385	-0.107759	-0.254546	-0.129994	-0.0164593	-0.115328	-0.0642903	-0.199596	-0.0976251	-0.391964	0.247097	-0.245694	-0.107252	0.217718	0.181867	0.346149	0.186076	-0.0485086
O43765	SGTA	-0.0808407	-0.171593	0.0198392	-0.0326525	-0.432274	-0.195922	-0.1325	-0.309504	0.0513037	0.114319	0.0314147	0.0411337	-0.21737	-0.200261	-0.261672	-0.299361	-0.227463	-0.400602	-0.343041	-0.30091	-0.378497	-0.511313	-0.0910882	0.0612068	-0.0504845	-0.138091	-0.200091	0.0341504	-0.0167182	-0.0123801	0.0435119	-0.0668369	0.0146771	-0.261948	-0.196373	-0.210645	-0.130536	-0.303004	-0.299165	-0.374699	-0.0905865	-0.333087	-0.28951	-0.0157276	-0.144207	-0.105048	-0.125821	-0.00722505
O43772	SLC25A20	0.0245098	0.349092	-0.507834	-0.486515	-0.297286	-0.285019	-0.189717	-0.335467	-0.132216	-0.102822	-0.0277581	-0.0564709	-0.178699	-0.199649	-0.283026	-0.32083	-0.142949	-0.268686	-0.458514	0.477323	0.0964072	0.160243	-0.278414	-0.0742988	0.0211408	-0.294162	-0.216158	-0.360534	-0.188147	-0.113172	-0.148093	-0.0230988	-0.252539	-0.232858	-0.28753	0.0503322	-0.151037	-0.371668	-0.267201	-0.0586466	-0.13329	-0.100202	-0.162885	-0.105718	-0.352912	-0.0447651	-0.114826	-0.238988
O43776	NARS1	0.372428	0.287055	0.518101	0.250889	0.251296	0.572086	0.278021	0.0710599	0.642092	0.366923	0.507537	0.0945024	0.346733	0.189394	0.197303	0.328549	0.372319	0.420977	0.234289	0.0729259	0.0402	-0.0518631	0.274242	0.652189	0.0522146	-0.042349	0.354872	0.438449	0.0768013	0.320518	0.0607013	0.462896	0.669135	0.243689	0.12448	0.108256	0.255259	0.423539	0.230996	0.4721	0.244162	0.733625	0.604093	0.596529	0.381867	0.195323	0.0352558	0.374879
O43790	KRT86	-0.071341	-0.0714452	-0.0705412	-0.0720964	-0.0721662	-0.0722391	-0.0722065	-0.0726154	-0.0718019	-0.0710434	-0.072789	-0.0713537	-0.0705533	-0.0704325	-0.0710548	-0.0713588	-0.0713768	-0.0722234	-0.0711924	-0.0705648	-0.0705155	-0.0709777	-0.0720632	-0.072483	-0.0735226	-0.0722858	-0.0666033	-0.0683238	-0.0740938	-0.0712652	-0.0701293	-0.0708997	-0.0700396	-0.0667255	-0.0654228	-0.0757322	-0.0653662	-0.0710484	-0.072427	-0.0696482	-0.0732392	-0.0716616	-0.0720372	-0.137829	-0.0714106	-0.0723681	-0.0719338	-0.070381
O43795	MYO1B	-0.0379482	-0.161321	-0.111295	-0.00887753	0.395832	0.26102	0.0597302	-0.272321	-0.273817	-0.652296	-0.0096667	-0.189004	-0.0151898	0.241644	-0.255185	0.186184	-0.345469	-0.323141	0.156831	0.18223	-0.0631557	-0.218178	-0.250742	0.136671	-0.159247	-0.161223	0.128322	-0.0687562	-0.359955	0.425483	-0.134268	0.015459	-0.352992	0.168564	0.0935224	0.211115	0.0264424	-0.188249	0.043087	0.12344	0.206523	0.455	-0.238255	-0.0463636	-0.310321	-0.168689	0.139534	-0.226896
O43809	NUDT21	0.409135	0.254444	0.0772135	0.411853	0.0443914	0.0830352	0.214179	0.209206	0.108139	0.0348039	0.0178815	-0.035226	0.368048	0.362899	0.393784	0.32484	0.236652	0.197209	0.294212	0.14591	0.241868	0.0193519	0.333475	0.165356	-0.230612	0.468132	0.148013	0.153395	0.183742	0.326391	0.299714	0.268012	0.388996	0.114259	0.137936	0.147545	0.186667	0.270557	0.343204	-0.208588	0.438688	-0.283745	0.46008	0.256518	0.339288	0.171973	0.34079	0.228519
O43813	LANCL1	-0.389896	-0.403898	-0.589785	-0.507995	0.0842483	-0.122951	-0.0841227	-0.00797899	-0.210718	-0.641999	-0.223892	-1.21699	-0.203565	-0.373107	-0.334396	-0.166121	-0.391251	-0.541501	-0.406158	-0.448636	-0.236159	-0.600601	-0.248695	-0.1613	-0.342585	-0.791985	-0.147695	-0.0317954	-0.370606	-0.433803	-0.110081	-0.470037	-0.073282	-0.161805	-0.25611	-0.162306	-0.329559	-0.144231	-0.463539	-0.281293	-0.409241	-0.29969	-0.143144	-0.434943	-0.398382	-0.137585	-0.344715	-0.3817
O43818	RRP9	0.327846	0.270505	0.344544	0.0249324	0.138959	0.154314	0.186824	-0.229709	0.0914773	0.201179	0.216595	-0.0519233	0.443097	0.482378	0.520185	0.211595	0.0297024	0.369864	0.0994214	0.057843	0.0690437	-0.0992446	-0.41605	-0.0600038	0.253442	-0.182744	0.417456	0.339984	0.301393	-0.00709969	0.0821698	0.088631	0.182544	0.183602	0.614094	0.0154942	0.190569	-0.0174885	-0.392606	0.118076	-0.204071	-0.199065	-0.0720372	0.587198	0.146345	0.100298	0.169669	-0.147033
O43823	AKAP8	-0.071341	-0.0714452	-0.0705412	-0.0720964	-0.0721662	-0.0722391	-0.0722065	-0.0726154	-0.0718019	-0.0710434	-0.072789	-0.0713537	-0.0705533	-0.0704325	-0.0710548	-0.0713588	-0.0713768	-0.0722234	-0.0711924	-0.12546	-0.0490892	0.111859	-0.0720632	-0.072483	-0.0735226	-0.0722858	-0.0666033	-0.0683238	-0.0740938	-0.0712652	-0.0701293	-0.0708997	-0.0700396	-0.0667255	-0.0654228	-0.0757322	-0.0653662	-0.0710484	-0.072427	-0.0696482	-0.0732392	-0.0716616	-0.0720372	-0.0713852	-0.0714106	-0.0723681	-0.0719338	-0.070381
O43827	ANGPTL7	-0.0370725	-0.353834	-1.11429	1.62826	-0.0721662	-0.0722391	-0.0722065	-0.0726154	-0.0718019	-0.0710434	-0.072789	-0.0713537	-0.0705533	-0.0704325	-0.0710548	-0.0713588	-0.0713768	-0.0722234	-0.0711924	-0.0705648	-0.0705155	-0.0709777	-0.0720632	-0.072483	-0.0735226	-0.0722858	-0.0666033	-0.0683238	-0.0740938	-0.0712652	-0.0701293	-0.0708997	-0.0700396	-0.0667255	-0.0654228	-0.0757322	-0.0653662	-0.0710484	-0.072427	-0.0696482	-0.0732392	-0.0716616	-0.0720372	-0.0713852	-0.0714106	-0.0723681	-0.0719338	-0.70667
O43837	IDH3B	0.0571984	0.24403	0.0737607	-0.0329125	0.404717	0.449629	0.346166	-0.0436049	0.194488	0.289072	0.19114	-0.258713	0.293586	0.223129	0.0393525	0.168501	-0.121878	0.00116626	-0.00472618	0.0395064	-0.0288191	-0.172362	0.10891	0.221561	0.269659	-0.00272837	0.312308	0.0956541	0.171113	0.194955	0.242702	0.122698	0.00322616	0.353345	0.303809	0.400102	0.139594	0.178501	0.146083	0.115715	0.201217	0.408946	0.0449334	0.253466	-0.23699	-0.255277	-0.277094	0.425297
O43847	NRDC	-0.071341	-0.0714452	-0.0705412	-0.0720964	-0.2204	-0.0153726	-0.0720894	0.610492	-0.0718019	-0.0710434	-0.072789	-0.0713537	-0.179926	-0.334812	-0.16251	-0.306431	-0.122544	-0.113904	-0.308121	-0.163788	-0.249265	-0.185504	-0.180629	-0.334359	0.856298	0.341382	-0.0677553	-0.00863267	0.158873	-0.227429	-0.264197	0.196311	-0.210432	0.131254	0.214949	-0.214202	-0.0809296	-0.246028	0.0142696	0.0175289	0.205553	0.0155221	-0.0274411	0.0576637	0.262595	0.574514	0.678492	-0.070381
O43852	CALU	0.203698	-0.120467	0.192481	0.444067	0.270874	0.189593	0.543936	0.207947	0.0204819	0.47339	0.208209	0.588746	0.160505	0.0575509	0.304741	-0.0767315	0.443083	0.512676	0.154425	-0.0427127	0.0237423	0.113883	-0.00801063	-0.0246121	-0.274475	0.4607	-0.0424878	-0.0953569	-0.0888092	0.00107381	-0.0202392	0.0562341	-0.0844324	0.030655	-0.118301	-0.634041	-0.329559	0.00814184	-0.0557604	0.197221	0.306595	0.459704	0.0454689	0.08842	0.745158	0.119355	-0.120834	-0.17074
O43861	ATP9B	-0.34428	0.172317	-0.0889058	0.130977	-0.344177	-0.284822	-0.295327	-0.149099	-0.0718019	-0.0710434	-0.072789	-0.0713537	0.149722	0.161164	0.212022	-0.22542	-0.303725	-0.0172906	-0.0244096	-0.332744	0.0713066	-0.065005	-0.0587277	0.000611855	0.126099	-0.0824781	0.0891188	0.0672415	0.0578135	-0.00264043	-0.0464686	-0.15814	-0.411089	-0.274733	0.155107	0.0886453	-0.187196	0.000915061	0.391399	-0.00720627	0.311001	0.0758479	0.0347861	0.430741	-0.175337	0.0921999	0.125889	0.260539
O43865	AHCYL1	-0.025922	-0.112762	-0.00190163	0.238876	-0.191909	-0.165714	0.033296	0.153964	-0.13646	-0.324959	-0.237	-0.144662	0.0643455	0.0884764	0.0363368	-0.0610272	-0.229949	0.129777	-0.168079	0.147576	-0.0225648	0.0696277	-0.222147	-0.184251	-0.357924	-0.34528	-0.658625	-0.67778	-0.459575	-0.364043	-0.266989	-0.354984	-0.393699	-0.3157	-0.468986	-0.367494	-0.623779	-0.18379	-0.193221	-0.184905	-0.528959	-0.0354788	0.231354	-0.641181	-0.00863674	-0.050494	0.013509	0.136869
O43896	KIF1C	-0.071341	-0.0714452	-0.0705412	-0.0720964	-0.0721662	-0.0722391	-0.0722065	-0.0726154	-0.0089254	0.16244	-0.072789	-0.0810565	-0.0705533	-0.0704325	-0.0710548	-0.0713588	-0.0713768	-0.0722234	-0.0711924	-0.0705648	-0.0705155	-0.0709777	-0.0720632	-0.072483	-0.0735226	-0.0722858	-0.0666033	-0.0683238	-0.0740938	-0.0712652	-0.0701293	-0.0708997	-0.0700396	-0.0667255	-0.0654228	-0.0757322	-0.0653662	-0.0710484	-0.072427	-0.0696482	-0.0732392	-0.0716616	-0.0720372	-0.0713852	-0.0714106	-0.0723681	-0.0719338	-0.070381
O43920	NDUFS5	0.124129	-0.0973903	0.271957	0.0681976	-1.01001	-1.72093	0.31055	-1.08536	-0.25519	-0.181483	-0.100218	0.135386	0.557591	0.128043	-0.0308107	-0.377568	-0.382199	-0.291342	-0.324511	0.301456	-0.218736	-0.181468	-0.0508	-0.39046	0.340658	-0.0775841	0.440031	-0.300348	-0.214045	-0.030648	0.480819	-0.132	0.106757	-0.0361232	0.0713042	-0.569598	-0.580923	-0.0742502	-0.483018	0.538099	-0.222675	0.493288	0.574918	-0.0694214	-0.0714106	-0.0723681	-0.0719338	0.521035
O43924	PDE6D	-0.490709	-0.454241	0.0331994	-0.289888	-0.290025	-0.0451719	-0.0935277	-0.218448	-0.0735874	0.0454914	-0.0894784	-0.137656	-0.206257	-0.245238	-0.404305	-0.206119	0.101656	-0.034366	-0.0706002	-0.137952	-0.0455655	-0.0850758	-0.172239	-0.181576	0.13451	0.0895776	-0.140333	-0.20392	-0.0107922	-0.302106	-0.483446	-0.274631	-0.238908	0.0192441	-0.179741	0.215336	0.029008	-0.232457	-0.459709	-0.398276	-0.0599012	-0.222561	-0.552829	-0.212773	-0.191267	-0.0537469	0.00957759	-0.189287
O60216	RAD21	-0.0424009	-0.49724	-0.650615	-0.229076	-0.380972	-0.551456	-0.305366	-0.342246	-0.0171289	-0.127485	0.0665325	-0.206381	0.196873	-0.167451	0.374786	0.0614446	-0.0264765	-0.0931104	0.155275	-0.193821	-0.346737	-0.043154	-0.423576	-0.050939	-0.205912	-0.37194	0.276991	0.000861091	0.179214	-0.442507	-0.303769	-0.299747	-0.368813	-0.178477	-0.193775	0.204238	0.0370575	0.237219	0.0215932	-0.0696482	-0.0732392	-0.0716616	-0.663364	-0.659923	-0.555541	-0.393299	-0.244206	-0.554089
O60231	DHX16	-0.071341	-0.0714452	-0.0705412	-0.0720964	-0.0721662	-0.0722391	-0.0722065	-0.0726154	-0.0718019	-0.0710434	-0.072789	-0.0713537	-0.0705533	-0.0704325	-0.0710548	-0.0713588	-0.0713768	-0.0722234	-0.0711924	-0.0705648	-0.0705155	-0.0709777	-0.0720632	-0.072483	-0.0735226	-0.0722858	-0.114083	0.192256	0.234996	-0.0712652	-0.0701293	-0.0708997	-0.0700396	-0.0667255	-0.0654228	-0.0757322	-0.0653662	-0.0710484	-0.072427	-0.0696482	-0.0732392	-0.0716616	-0.0720372	-0.0713852	-0.0714106	-0.0723681	-0.0719338	-0.070381
O60234	GMFG	-0.071341	-0.0714452	-0.0705412	-0.0720964	-0.0721662	-0.0722391	-0.0722065	-0.0726154	-0.0718019	-0.0710434	-0.072789	-0.0713537	-0.0705533	-0.0704325	-0.0710548	-0.0713588	-0.0713768	-0.0722234	-0.0711924	-0.0705648	-0.0705155	-0.0709777	-0.0720632	-0.072483	-0.0735226	-0.0722858	-0.407867	-0.38923	0.85417	-0.0712652	-0.0701293	-0.0708997	-0.0700396	-0.0667255	-0.0654228	-0.0757322	-0.0653662	-0.0710484	-0.072427	-0.0696482	-0.0732392	-0.0716616	-0.0720372	-0.0713852	-0.0714106	-0.0723681	-0.0719338	-0.070381
O60244	MED14	-0.741134	-0.757799	-0.93521	-0.746734	-0.0721662	-0.0722391	-0.0722065	-0.0726154	-0.280989	-0.168759	-0.222004	-0.193288	-0.159466	-0.16998	-0.228167	-0.342715	-0.574054	-0.359309	-0.504114	-0.101925	-0.0543751	-0.0747888	-0.237619	0.0519084	-1.31184	0.00344341	0.230888	-0.0362227	0.24556	-0.247462	-0.168689	-0.199045	-0.361162	-0.133444	-0.269484	0.106241	-0.094303	-0.32186	-0.147736	-0.238314	-0.206228	-0.335569	-0.108399	-0.144838	-0.720411	-0.266364	-0.280004	-0.841946
O60256	PRPSAP2	-0.214799	-0.0878214	0.115887	-0.126339	-1.73431	-1.35563	-1.52504	-1.62183	-0.172469	-0.184222	-0.233859	-0.292011	0.0695027	0.0285195	-0.172618	-0.344061	-0.00273319	0.211852	-0.145647	-0.0922518	-0.100866	-0.102453	-0.301456	0.0534535	0.0756597	-0.128667	-0.265179	-0.22068	-0.0251355	-0.251857	-0.0202392	-0.112891	-0.000146591	-0.0169158	-0.211913	0.196863	0.0220939	-0.0960534	-0.245691	-0.104833	-0.339566	-0.360425	-0.0308345	-0.00561622	0.393268	0.348804	0.369407	-0.174585
O60262	GNG7	0.125197	-0.024496	-0.643744	-0.254394	0.0224372	-0.311265	-0.176988	-0.261	0.111296	-0.236837	-0.0658285	-0.509551	0.0175616	0.154458	0.457935	-0.0325425	-0.157046	0.0783536	-0.244549	-0.244642	-0.588155	-0.354657	0.226399	-0.0904013	0.277582	-0.124445	-0.31169	0.0574071	-1.2007	-0.349665	-0.197153	-0.653155	-0.291801	-0.208727	-0.203516	-0.0632285	-0.464466	-0.293285	-0.590591	-0.0942892	-0.69704	-0.226027	-0.29987	-0.367866	-0.0714106	-0.0723681	-0.0719338	-0.209476
O60264	SMARCA5	0.108273	0.176601	-0.407669	0.388253	-0.20429	-0.226236	-0.221334	-0.47094	-0.0492549	-0.135274	-0.039179	-0.13757	-0.152336	-0.0736852	-0.0737274	-0.224425	-0.209093	-0.234572	-0.187995	0.0965047	0.302518	-0.150727	-0.00662142	0.0519084	-1.31184	0.445944	-0.133316	-0.0415212	0.249658	-0.15509	-0.31946	0.0808407	-0.136388	-0.190313	-0.0422993	-0.0224227	-0.00445186	-0.316565	-0.310111	-0.216845	-0.203342	-0.244341	-0.074867	-0.0812879	-0.0714106	-0.0723681	-0.0719338	0.277142
O60271	SPAG9	-0.212072	-0.23181	-0.222421	-0.211983	0.0280171	-0.067883	-0.0116415	-0.460211	-0.071143	0.0540584	-0.156453	0.201972	0.0455736	0.219224	-0.0243207	-0.0779924	0.0257575	-0.309345	0.103995	-0.247456	-0.210965	-0.050282	-0.137942	-0.0097298	0.0880649	0.0524579	0.01796	0.137523	-0.059272	0.0614838	-0.0042342	-0.134477	-0.0245951	-0.071256	-0.100514	-0.319697	-0.277072	-0.0348094	-0.061484	0.247815	-0.637713	-0.262158	0.0199307	0.132145	-0.0120683	-0.201961	0.0315558	-0.165219
O60287	URB1	-0.33662	-0.367844	0.105786	0.0147783	0.79758	0.333082	0.259416	0.256369	0.130357	0.402955	0.276411	0.25297	0.102845	0.126097	0.0436037	0.0423269	-0.0727746	0.0665439	0.107351	0.14591	0.0924576	0.20551	-0.276453	-0.313264	-1.24331	-0.105711	0.4669	0.140679	0.532189	0.511395	0.497464	0.374622	0.274825	-0.192704	-0.0337605	0.181468	-0.0759101	-0.000430534	0.145069	0.359736	0.44652	0.626061	0.00717042	0.2957	-0.142953	-0.190113	0.0794024	-0.026428
O60296	TRAK2	-0.071341	-0.0714452	-0.0705412	-0.0720964	-0.0721662	-0.0722391	-0.0722065	-0.0726154	-0.0718019	-0.0710434	-0.072789	-0.0713537	-0.674038	-0.792097	-0.741191	-0.0713588	-0.0713768	-0.0722234	-0.0711924	-0.0705648	-0.0705155	-0.0709777	-0.0720632	-0.072483	-0.0735226	-0.0722858	-0.0666033	-0.0683238	-0.0740938	-0.0712652	-0.0701293	-0.0708997	-0.0700396	-0.0667255	-0.0654228	-0.0757322	-0.0653662	-0.0710484	-0.072427	-0.0696482	-0.0732392	-0.0716616	-0.0720372	-0.0713852	-0.0714106	-0.0723681	-0.0719338	-0.070381
O60306	AQR	0.709296	0.293775	0.540104	-0.608111	-0.143773	-0.182968	-0.0551707	-0.0937737	0.272471	0.292717	0.2826	0.0800057	0.206945	0.339182	0.293649	0.176224	-0.0172821	0.0488809	-0.1185	0.0186963	0.252511	-0.0740555	0.234847	0.0549619	-0.0211182	0.078733	-0.43961	-0.408934	-0.184081	-0.125161	0.302826	0.234604	0.211363	0.169731	0.3451	0.102931	0.0128664	0.151855	0.0502145	-0.0244096	0.314523	-0.145171	0.011879	-0.212313	0.112078	0.20303	0.171401	-0.729817
O60313	OPA1	0.184365	0.255686	0.254407	-0.204414	0.264886	0.335412	0.0194706	-0.156474	0.0881596	-0.0369581	0.0612813	-0.30979	0.300474	0.370698	0.25976	0.467218	0.126012	0.368412	-0.0671565	0.215633	0.199272	0.36144	0.00232008	0.270294	0.217003	-0.171656	0.233082	0.160266	-0.313314	-0.048642	0.366877	0.20393	0.257101	0.178677	0.306194	0.176733	0.29386	0.213399	-0.0378805	0.252116	-0.0756777	-0.123384	0.207877	0.113962	0.100669	-0.0600355	-0.145046	0.113551
O60333	KIF1B	-0.071341	-0.0714452	-0.0705412	-0.0720964	-0.0721662	-0.0722391	-0.0722065	-0.0726154	-0.0718019	-0.0710434	-0.072789	-0.0713537	-0.0705533	-0.0704325	-0.0710548	0.0870713	0.0775188	-0.0735775	0.00858709	-0.0705648	-0.0705155	-0.0709777	-0.0720632	-0.072483	-0.0735226	-0.0722858	-0.0666033	-0.0683238	-0.0740938	-0.0712652	-0.0701293	-0.0708997	-0.0700396	-0.0667255	-0.0654228	-0.0757322	-0.0653662	-0.0710484	-0.072427	-0.0696482	-0.0732392	-0.0716616	-0.0720372	-0.0713852	-0.0714106	-0.0723681	-0.0719338	-0.070381
O60341	KDM1A	-0.0635231	-0.0300998	-0.0677207	-0.0588548	-0.0331725	-0.0366859	-0.157805	-0.19042	0.0146899	-0.0967225	0.15651	-0.181272	-0.131481	0.0193316	-0.0801693	0.130446	0.147867	0.137374	0.0856957	0.0346475	0.196356	0.0548269	0.0356305	-0.0464876	1.0712	-0.0439491	0.230888	0.237137	0.180743	0.190917	0.0386446	0.163838	0.0483069	-0.133776	-0.149428	-0.000874013	-0.139388	-0.0871633	0.0687034	-0.361995	-0.418693	-0.317168	0.0361271	-1.01769	-0.226414	-0.128569	0.0191165	-0.100832
O60343	TBC1D4	-0.189871	0.368811	0.529383	0.184791	0.553398	0.16102	-0.21959	0.595313	0.318986	0.317131	0.315021	0.173595	0.0819871	0.388889	0.386937	0.319808	0.170751	0.18875	0.260741	0.0452491	0.0151949	0.449145	0.167202	0.139907	0.478327	-0.0890879	0.628185	-0.140056	-0.0289668	0.295153	1.17432	-0.078013	0.793835	0.563132	0.749179	-0.147787	0.578938	0.24996	0.0500881	0.342964	0.44652	0.200004	0.775328	0.204262	-0.366158	0.123547	0.247539	0.421077
O60443	GSDME	-0.0424009	0.281621	-0.108903	0.0953107	0.625111	-0.382527	-0.60423	0.195026	0.115749	-0.291622	0.186511	0.381388	0.021327	-0.131232	0.383466	-0.1584	-0.0705827	-0.134413	-0.189078	0.324568	0.284562	-0.0565324	-0.0747418	1.01028	-0.469557	-0.23451	-0.548261	-0.0478841	-0.306577	-0.232867	0.441662	-0.215912	0.107767	0.276403	-0.259091	0.0338245	0.206077	-0.297174	-0.44241	-0.447888	-0.174424	-0.453274	-0.483568	-0.139608	-0.0714106	-0.0723681	-0.0719338	0.473016
O60462	NRP2	-0.071341	-0.0714452	-0.0705412	-0.0720964	0.0906263	0.0554526	0.233291	-0.223173	-0.089099	-0.188407	0.131671	-0.179358	-0.0984302	-0.340803	-0.208228	-0.244344	-0.068714	-0.152519	-0.272248	-0.130947	-0.107054	0.36324	-0.215644	-0.0353551	-0.0233744	0.0751863	-0.114083	-0.67778	-0.353292	-0.703058	-0.0701293	-0.128824	-0.0700396	0.0876088	-0.0955549	0.1811	-0.00304385	-0.422186	-0.139946	-0.175643	-0.103952	0.0191364	-0.258688	-0.3541	0.154985	-0.673782	0.0987592	-0.070381
O60486	PLXNC1	0.486926	1.08905	0.338038	1.07133	0.204274	0.0036071	0.240089	-0.0746001	0.0437583	0.444948	0.296037	0.546777	-0.0952522	0.419792	0.264545	-0.271435	0.00281538	-0.164856	0.462306	-0.13623	0.0489183	0.310823	0.454618	-0.253539	0.147433	-0.47392	0.46601	0.0208404	0.159597	0.645873	0.0165663	0.241842	0.431526	-0.423024	-0.488571	-0.486329	-0.279259	-0.0558266	-0.297236	0.348602	0.16654	0.0569499	-0.0793409	0.437504	0.250515	-0.301858	-0.448862	0.354702
O60493	SNX3	-0.0813685	-0.112762	-0.279386	-0.131674	-0.124171	0.216631	0.548234	-0.263491	0.119748	0.53825	0.0769427	0.125063	0.216814	0.18319	0.214332	0.114703	-0.215658	-0.100022	-0.0513527	0.425593	0.0862447	0.496178	-0.201979	-0.167429	-0.488966	0.110342	0.118895	-0.162205	0.22386	-0.205361	0.063751	-0.119766	0.0917232	0.474507	-0.465512	0.334609	0.0278822	0.0722636	-0.0557604	-0.136052	0.0580817	0.00413803	0.0449334	0.460206	0.202211	-0.154074	0.199035	0.195891
O60502	OGA	0.209312	0.39382	0.311414	0.0371975	-0.137674	-0.0951668	0.078554	-0.19396	-0.183662	-0.0308378	-0.156453	-0.365704	-0.151503	-0.146263	-0.186758	-0.737097	-0.504063	-0.537527	-0.752816	-0.0906051	-0.387986	-0.576812	-0.0165097	-0.194571	-0.0627292	-0.361878	0.0248809	0.0489305	-0.179697	0.0345691	0.179951	0.372026	0.250673	0.0341351	-0.261179	0.0406995	-0.131535	0.0370867	-0.21437	-0.434565	-0.0529754	-0.124141	-0.0699718	0.0236209	-0.301044	0.0428408	-0.244581	-0.161232
O60506	SYNCRIP	0.119749	0.0605779	0.232129	0.222161	-0.26362	0.174848	0.151258	-0.0436049	0.194488	0.261058	-0.113866	0.0448179	0.387821	0.0630233	0.284277	-0.151123	0.06847	-0.37288	0.205146	0.18567	-0.1252	-0.203567	0.0785647	0.026181	-0.254076	-0.256726	0.342067	-0.0579407	0.316917	0.0682169	0.242702	-0.528218	0.240571	0.636806	-0.274395	-0.334747	0.071205	0.11095	-0.12101	0.367978	-0.00252377	0.39868	0.413806	0.281181	0.289406	0.0300884	0.149709	0.158745
O60518	RANBP6	0.05286	0.313292	0.18593	0.236807	0.397218	0.398676	-0.217968	0.075834	0.228513	0.499199	0.210122	0.39852	0.17305	0.129883	0.151308	0.140172	0.000114566	0.0581616	-0.071403	0.319056	0.158025	0.320497	0.229421	0.150812	0.38596	0.20943	0.202663	0.407614	0.133853	0.229356	0.199296	0.118898	0.204093	0.367288	0.383594	0.0713339	0.198979	0.0805463	0.0394404	0.187553	0.154825	0.0452228	0.395279	0.306672	-0.0714106	-0.0723681	-0.0719338	0.266701
O60522	TDRD6	0.751287	0.433158	0.819171	0.444257	0.664945	0.901515	0.881341	0.371555	0.796189	0.597818	0.618065	0.351457	0.801828	0.54169	0.646614	0.624271	0.744153	0.626725	0.53657	0.921221	0.68582	0.112693	1.05763	1.07174	0.0799456	0.998561	1.39927	0.941731	0.76152	0.330625	0.713362	0.394486	0.808834	0.908452	0.676507	0.218483	0.684022	0.850813	0.542031	1.51606	0.576491	1.11095	1.04684	0.692702	0.813053	0.53765	0.529411	0.3436
O60547	GMDS	0.209312	0.233845	0.30239	0.189331	-0.270987	0.65393	0.618728	-0.0910739	0.454382	0.529722	-0.114917	0.215292	0.322127	-0.0267314	0.328096	0.073343	0.428467	0.461288	0.176646	0.466971	0.411918	0.195196	-0.142045	-0.324266	-0.0425945	-0.650227	0.574988	0.0729798	0.0210228	0.023386	0.115577	0.0947803	0.404244	0.891577	0.53375	-0.39988	0.26681	0.0501291	-0.0997445	0.334591	-0.107639	0.289414	0.499169	0.223209	-0.153332	0.290783	0.298272	0.195891
O60568	PLOD3	-0.370273	-0.428434	-0.0831102	0.207764	0.104599	0.103852	0.519685	0.249307	-0.00657404	0.429021	-0.00861467	0.408335	0.530355	0.168624	0.178695	0.215959	0.308582	1.01159	0.35632	0.23398	0.192833	0.270673	0.13607	0.115608	0.141167	0.549702	0.62541	0.338671	0.397288	0.106592	-0.205572	-0.0230738	-0.0724021	0.328029	0.172655	-0.25611	0.311014	0.270557	0.131955	0.0840551	0.0320151	0.444742	0.2138	-0.145678	0.0996948	0.14518	-0.0629099	0.0925803
O60610	DIAPH1	-0.0319006	-0.0776851	0.0197935	-0.110017	0.0647121	0.2693	0.460111	-0.278614	0.157755	0.224943	0.230604	0.172065	0.039254	0.017395	0.124553	-0.0584113	-0.0252646	0.068223	0.186606	-0.391943	-0.286928	0.0562297	-0.306687	-0.0651353	0.0154037	-0.0586381	-0.192019	-0.166007	0.320428	-0.131551	0.0832777	0.0612643	0.0582434	0.11604	-0.00647935	0.0406995	0.0637984	-0.18379	-0.111335	-0.09236	-0.117021	-0.310465	0.138415	-0.201708	-0.221457	0.0265467	-0.232501	0.269213
O60613	SELENOF	0.111916	-0.206695	0.141999	0.14081	-0.287002	0.0939431	0.398362	0.186697	0.0651517	0.294274	-0.131681	0.419759	-0.167928	0.257676	0.0149899	0.697001	0.492062	0.603038	0.668598	0.41475	0.27213	0.420858	0.0977294	-0.756437	-0.163614	0.152398	0.437791	-0.096654	0.372694	0.117634	0.092207	0.164726	0.330241	0.354804	0.0435088	0.140884	-0.0824901	0.418421	0.339669	0.128466	-0.0437629	0.425113	0.184731	0.13423	0.627225	0.369501	0.333493	-0.362254
O60645	EXOC3	-0.116845	-0.12576	-0.226922	-0.0737145	0.221162	0.54033	0.66272	-0.302381	-0.273817	-0.0779002	-0.239186	-0.264026	-0.0879457	0.030446	0.0309883	-0.147392	0.0799911	-0.096668	-0.318857	0.0986803	-0.149475	0.50603	0.047687	0.0245332	0.215185	-0.143451	0.0725068	-0.0115264	-0.0966918	0.235075	0.264421	0.207842	0.27745	-0.0529841	-0.403888	-0.784785	-0.363726	-0.252062	-0.296317	-0.247116	-0.329714	-0.330211	-0.257007	-0.235434	-0.0977527	-0.506444	-0.407355	0.0167989
O60664	PLIN3	0.0849586	-0.00768055	0.127739	0.210046	0.0163685	0.388818	0.379795	-0.403881	0.27515	0.0234311	0.034596	-0.472572	0.215463	0.0324116	0.00287776	0.0423269	0.227075	0.615101	-0.202379	-0.0669032	0.0422446	-0.234576	-0.164196	-0.164494	0.283032	-0.714687	0.0984877	0.151566	-0.13341	0.422616	0.242702	-0.00761828	0.0906167	0.407479	0.433632	-0.254117	-0.00445186	0.152419	0.238285	0.132111	0.551369	0.0652817	0.12332	0.477789	0.703442	-0.414994	-0.182608	-0.249542
O60678	PRMT3	-0.0241876	-0.0544903	0.0599527	0.100565	-0.0721662	-0.0722391	-0.0722065	-0.0726154	0.253477	0.472292	0.271667	0.575751	0.177008	-0.0867963	0.121763	0.0306296	-0.021917	-0.0111132	-0.0740728	0.11552	0.10508	0.0174747	0.0614127	0.239606	0.20828	0.168433	0.130448	0.192438	0.0698081	-0.0316896	-0.0821577	-0.00193162	-0.0356977	0.0126021	0.0344608	0.117491	0.0746189	0.0504575	0.0733321	-0.0491764	0.0433628	-0.0892087	0.0583576	0.240258	0.139069	0.256415	0.389392	0.0263812
O60684	KPNA6	0.353892	0.157413	0.243862	-0.0657024	-0.0630867	0.0546014	0.02372	-0.0399671	0.074348	-0.119375	-0.0867516	-0.312754	0.098713	-0.0118791	0.0443389	-0.131912	-0.151431	-0.279181	-0.495781	-0.0867159	-0.0378575	-0.235887	-0.0738464	-0.126042	0.159803	-0.135318	0.285624	0.29781	0.129723	-0.208142	0.145368	0.0142399	0.287256	0.224143	0.178562	0.146852	0.145315	0.0732652	0.0548324	0.0527145	0.00174061	0.024591	0.132779	-0.0553298	0.241924	0.147803	-0.042336	-0.215053
O60701	UGDH	-0.654112	-0.846707	-1.26271	-0.456003	-0.512667	-0.748967	-0.971555	-0.136173	-0.959839	-0.711528	-0.497146	-0.275194	-0.750234	-0.731433	-0.836971	-0.809291	-0.808809	-0.588015	-0.577148	-0.633438	-0.659616	-0.963529	-0.581097	-0.907143	-0.24374	-0.358143	-1.02996	-0.578747	-0.916145	-0.712693	-1.22403	-0.681861	-1.35886	-0.684404	-0.282188	-1.08838	-0.555794	-1.00758	-0.76968	0.228215	-0.572146	-0.904717	-0.832208	-0.566354	-0.461995	-0.479818	-0.31567	-0.440588
O60716	CTNND1	0.00327105	0.107554	-0.112818	0.184791	0.0487944	-0.279727	-0.046472	-0.605425	-0.0931188	-0.0755362	0.228091	-0.143534	-0.19572	-0.120273	-0.0165628	-0.265228	0.0864717	-0.376078	0.049439	-0.223189	-0.259152	-0.190014	0.0703325	0.0151895	0.0385803	0.0260372	-0.056303	0.000145589	-0.384827	-0.00264043	-0.179673	0.0540419	0.0399155	0.0667295	-0.00259535	0.0338245	0.115336	-0.0941623	0.100748	-0.0700383	-0.112275	-0.0382708	-0.0168082	0.165018	0.224604	-0.265184	-0.226988	0.0785542
O60749	SNX2	0.0376628	0.0419085	-0.116784	-0.252502	-0.102123	0.0355264	0.19407	-0.393392	0.0408748	0.147359	0.0788205	-0.390264	0.105847	0.173713	0.143182	-0.0357446	0.446734	0.0130887	-0.545687	0.0950687	0.144231	0.0121317	0.0535617	0.1507	0.0565109	-0.350496	0.161215	0.266839	-0.169769	0.230863	0.4071	-0.281679	0.162524	0.301458	0.0648549	-0.285344	0.232777	0.290127	-0.333833	-0.00680942	-0.512114	-0.141565	0.0896689	-0.109571	0.463087	-0.896319	-0.646007	0.24431
O60762	DPM1	0.215228	0.121653	0.279137	0.334692	-0.0235215	-0.157969	-0.216297	0.477668	0.0707318	0.524494	0.259164	0.307777	-0.126343	-0.178684	-0.0669473	0.0795968	0.478405	0.345139	0.620669	0.112239	0.165779	0.317984	0.139097	0.618318	0.183331	0.540794	-0.411774	-0.477221	-0.372793	0.208426	-0.121998	0.405216	0.144275	-0.13779	-0.125643	-0.0504899	0.106122	-0.00325133	0.11358	0.397028	0.366357	0.488932	0.16546	0.223867	0.216465	0.22051	0.206192	0.160058
O60763	USO1	-0.347998	-0.285691	-0.203391	-0.157858	-0.0844044	-0.237947	-0.0422894	-0.0825275	-0.177983	-0.0179835	-0.0959838	0.203392	-0.175341	-0.250838	-0.186454	-0.122445	-0.0946612	-0.228062	-0.250551	0.104855	-0.180246	0.032227	-0.1921	-0.265563	-0.00801414	0.00906155	-0.0861628	-0.116232	0.129344	0.100236	-0.146939	-0.148454	-0.199373	-0.0995282	-0.146077	0.132366	-0.139423	-0.141906	-0.0326629	-0.258773	-0.21102	-0.209107	-0.162077	-0.128696	-0.0271158	-0.115866	-0.229085	-0.0444199
O60783	MRPS14	0.22027	0.207715	-0.0308919	-0.0293053	-0.00862669	0.105713	0.119348	-0.290185	0.260161	0.160481	0.266823	-0.00841874	0.294835	0.0805676	0.359089	0.257412	0.244621	0.245339	0.0486816	0.188355	0.168407	0.0736854	0.0937869	0.240372	0.120875	0.267543	0.216426	0.0874509	0.0739952	0.014452	0.150492	-0.0666515	0.16594	0.12294	0.0534811	-0.149673	0.020978	0.153566	0.043473	0.171391	0.435476	-0.221589	0.147739	0.163379	0.216613	0.0781827	0.00135775	0.133705
O60784	TOM1	-0.209608	-0.149067	-0.191551	-0.402386	-0.350722	-0.173013	-0.492819	0.0653633	-0.254096	0.0849259	-0.116559	0.0165912	-0.288436	-0.208639	-0.302317	-0.0147386	0.132156	0.00754875	-0.183596	-0.22606	-0.135631	-0.287367	-0.0208763	0.0222768	0.323199	0.0567543	-0.258574	-0.119364	-0.210313	0.123716	-0.0600015	0.179951	-0.130646	-0.270441	-0.174692	0.0154942	0.0395086	-0.0916676	-0.245691	-0.318527	-0.112275	-0.140488	-0.150588	-0.118631	0.150856	-0.0743998	0.121367	-0.289126
O60814	H2BC12	-0.0718961	0.13088	0.0275251	0.116877	0.254945	0.0502282	0.221996	0.274406	0.0621449	0.0116415	0.0724639	0.0620177	0.309232	0.223543	0.286302	0.113367	0.131362	-0.185772	0.111044	0.0317667	0.0823792	-0.0503198	0.12466	0.115565	0.222002	0.137192	0.106632	0.00737295	0.149652	-0.0153364	0.142862	0.355328	0.259202	0.249198	0.228337	0.0686999	0.140621	0.790263	0.526743	0.125125	-0.164406	-0.0038907	-0.00646878	0.020644	-0.316625	-0.299821	-0.216868	0.224467
O60825	PFKFB2	0.36112	0.79513	0.208681	-0.677308	-0.308105	0.0276269	0.0363246	-0.160056	0.218645	-0.186439	0.146757	0.180536	-0.26516	-0.075107	-0.186021	-0.0459408	0.230967	-0.132057	-0.235808	0.308025	0.283424	-0.248881	-0.108315	0.0660207	-0.547492	-0.161223	0.322616	0.207187	-0.412662	-0.331797	-0.0133302	-0.261989	-0.345778	-0.317403	-0.189447	-0.559324	-0.320241	-0.24015	-0.157276	-0.315008	-0.420597	-0.113718	-0.140073	-0.578248	-0.111558	-0.566386	-0.550527	-0.726538
O60826	CCDC22	-1.12153	-0.914985	-1.47977	-0.987069	0.458878	-0.387738	-0.448445	-0.410586	-0.206948	-0.0740686	-0.191177	0.210527	-0.544295	-0.458519	-0.601346	0.230592	0.190058	-0.0323662	0.0691937	-0.195938	-0.498941	-0.0736552	-0.887384	-0.074771	-1.49651	-0.812225	0.0189184	-0.00508321	0.112112	-0.0174514	-0.152232	0.0501033	-0.122168	-0.615205	-0.512498	-1.36773	-0.936537	-0.153952	-0.0961297	0.00811774	0.1755	0.203214	-0.439111	-0.113821	-1.31035	-1.14606	-1.03708	-1.00481
O60832	DKC1	0.294022	0.0529841	0.393997	0.53563	0.240187	0.153196	0.144944	0.161259	0.164334	-0.0237635	0.0302395	-0.0447865	0.25642	-0.180069	0.18156	-0.327146	-0.311557	-0.21877	-0.246106	0.106908	0.156216	-0.39919	0.148679	0.173596	-0.0441809	0.0383445	0.275046	0.096973	0.16642	-0.242247	-0.295619	-0.203639	-0.205361	-0.149042	0.145017	-0.836574	-0.0957627	0.0585446	0.186196	0.408344	-0.00383395	0.0368367	0.0617286	0.019283	-0.319858	-0.156694	-0.183987	0.215818
O60841	EIF5B	0.100153	0.0376195	0.135676	-0.127969	0.298735	0.608203	0.890609	-0.154449	0.468169	0.0849259	0.311986	-0.028972	0.638842	0.293038	0.337933	0.249835	0.238386	0.38086	0.315745	-0.489372	-0.516627	-0.804734	0.247572	0.195268	-0.149849	0.0865133	0.420169	0.273455	-0.0408947	0.0799992	0.0623774	0.119729	0.0690032	0.244742	0.293066	0.0242739	0.166912	0.560436	0.178281	0.255586	0.11488	0.206012	0.642537	0.0516909	-0.0227225	0.177714	-0.235208	0.216559
O60879	DIAPH2	-0.071341	-0.0714452	-0.0705412	-0.0720964	-0.0721662	-0.0722391	-0.0722065	-0.0726154	-0.0718019	-0.0710434	-0.072789	-0.0713537	-0.0705533	-0.0704325	-0.0710548	-0.0713588	-0.0713768	-0.0722234	-0.0711924	-0.0705648	-0.0705155	-0.0709777	-0.0720632	-0.072483	-0.0735226	-0.0722858	-0.0666033	-0.0683238	-0.0740938	-0.0712652	-0.0701293	-0.0708997	-0.0700396	-0.0667255	-0.0654228	-0.0757322	-0.0653662	-0.0710484	-0.072427	-0.0696482	-0.0732392	-0.0716616	-0.583439	-0.0713852	-0.0714106	-0.0723681	-0.0719338	-0.070381
O60884	DNAJA2	-0.0440427	-0.183473	-0.147033	0.0874485	-0.168713	-0.0184207	0.125698	-0.152832	-0.233859	-0.111705	-0.160763	-0.0303242	-0.162645	-0.157474	-0.196522	-0.00109665	-0.0329049	0.0232807	-0.0438239	-0.531624	-0.240415	-0.368922	0.0506601	-0.000842659	-0.39404	0.0511218	-0.189696	-0.187553	-0.258342	-0.0683109	-0.0318562	-0.0651887	-0.117481	-0.112409	-0.0591861	0.0213173	-0.247563	-0.0977318	-0.29433	-0.275461	-0.158795	0.0896564	-0.144796	-0.431846	-0.0710648	-0.0316329	-0.516935	0.0606312
O60888	CUTA	-0.52036	-0.156042	-0.156218	-0.771776	-0.0448959	-0.184385	-0.142365	-0.326955	-0.222258	-0.540693	-0.258981	-1.14905	0.0601636	-0.578611	0.13585	-0.15294	-0.443982	-0.65805	-0.328096	-0.660873	-0.458454	-1.67023	-0.228168	-0.402251	-0.543566	-0.668499	-0.169829	0.259915	-0.348851	-0.644496	-0.432532	-0.308697	0.0700766	0.18625	0.0428598	-0.229228	-0.382398	-0.246028	-0.857565	-0.576319	-0.648903	-0.39519	0.296046	-0.49756	-0.281173	-0.738168	-0.941192	-0.41925
O60925	PFDN1	0.27106	0.26745	-0.0475787	0.0349489	0.0720047	0.166589	0.393993	0.0052498	0.0360211	0.147696	0.00356243	-0.0256684	0.106185	0.043001	0.0469707	0.125112	0.337459	0.261819	0.219339	0.296204	0.342049	0.339318	-0.0877482	0.15186	-0.155212	0.068204	0.369994	0.345738	0.232103	-0.158996	-0.212687	-0.236394	-0.152939	0.0353333	-0.0700928	-0.289278	-0.0905001	0.32617	0.184599	-0.126239	-0.179889	0.0430819	0.199724	-0.00839197	-0.0467245	-0.193478	0.0968481	-0.0854857
O60936	NOL3	-0.187311	-0.272704	-1.03399	-0.293745	-0.801894	-0.636274	-0.382181	-1.03035	-0.0277032	-0.876135	0.0403299	-1.3454	-0.0588643	-0.0682322	0.09226	-0.610687	-0.86989	-0.854142	0.00918374	-0.55808	-0.887801	-0.776943	-0.425874	-0.820995	-0.573432	-0.764566	-0.803176	0.10929	-0.437505	-0.0534069	-0.291718	-0.156243	-0.0927387	-0.41233	-0.475685	0.555054	0.332372	-0.486654	-0.652721	-0.606664	-0.418563	-0.199657	-0.254373	-0.980399	-0.83517	-0.373446	-0.559138	-0.470282
O75027	ABCB7	0.0515506	0.172317	-0.0109823	0.170778	0.993512	0.449096	-0.0564823	0.270488	0.624422	0.837254	0.599986	0.452484	0.465289	0.175947	0.366883	-0.179622	-0.324913	-0.330514	-0.380875	0.223295	0.374916	0.231172	-0.0720632	-0.072483	-0.0735226	-0.0722858	0.0732889	0.0890612	0.0234401	-0.0174514	0.274114	-0.0826964	0.0932626	0.0286892	-0.10315	0.122882	-0.0706163	0.272294	0.14381	-0.0403498	-0.0756777	0.157653	0.24195	0.19299	0.0708369	0.317099	-0.141746	0.490111
O75044	SRGAP2	-0.158339	-0.0846371	-0.0301356	0.00547823	-0.167291	-0.193324	-0.122637	-0.215578	-0.31222	0.0488181	-0.133964	-0.0493331	-0.278965	-0.363667	-0.439612	-0.281497	-0.194036	-0.223179	-0.115797	-0.185273	-0.0806194	0.0323857	-0.245469	-0.0803272	-0.11126	-0.0152549	-0.416582	-0.0887747	0.117057	-0.114921	-0.352031	-0.0158539	-0.199289	-0.257732	-0.128422	-0.133024	-0.1511	-0.578943	-0.0396107	-0.00476239	0.167527	-0.123384	-0.171758	-0.0238888	-0.270584	-0.184251	-0.0648254	-0.0400732
O75051	PLXNA2	-0.071341	-0.0714452	-0.0705412	-0.0720964	-0.0721662	-0.0722391	-0.0722065	-0.0726154	-0.0718019	-0.0710434	-0.072789	-0.0713537	-0.0705533	-0.0704325	-0.0710548	-0.0713588	-0.0713768	-0.0722234	-0.0711924	-0.0705648	-0.0705155	-0.0709777	-0.0720632	-0.072483	-0.0735226	-0.0722858	-0.0666033	-0.0683238	-0.0740938	-0.0712652	-0.0701293	-0.0708997	-0.0700396	-0.0667255	-0.0654228	-0.0757322	-0.0653662	-0.872516	0.0183019	-0.0696482	-0.0732392	-0.0716616	-0.0720372	-0.0713852	-0.0714106	-0.0723681	-0.0719338	-0.070381
O75063	FAM20B	0.329647	0.167661	-0.169889	-0.183791	0.365412	0.248072	0.0181499	0.100481	0.110569	0.3961	0.337509	0.220769	0.0595701	0.0014578	-0.0193124	0.270577	0.370882	0.264919	0.0931303	-0.0376953	0.0349815	-0.00308862	-0.0546185	0.0970406	0.0803549	0.119965	0.0519352	0.359529	0.391002	0.155162	-0.198632	0.0998522	-0.0387291	-0.119281	0.111823	-0.137711	0.016614	-0.0413632	0.198126	0.165597	-0.00936525	0.099598	-0.0704952	0.0999784	-0.198062	0.149284	0.120696	-0.107616
O75064	DENND4B	-0.071341	-0.0714452	-0.0705412	-0.0720964	-0.0721662	-0.0722391	-0.0722065	-0.0726154	-0.0718019	-0.0710434	-0.072789	-0.0713537	-0.0705533	-0.0704325	-0.0710548	-0.0713588	-0.0713768	-0.0722234	-0.0711924	-0.0705648	-0.0705155	-0.0709777	-0.0720632	-0.072483	-0.0735226	-0.0722858	-0.724225	-0.612703	-0.340663	-0.0712652	-0.0701293	-0.0708997	-0.0700396	-0.0667255	-0.0654228	-0.0757322	-0.0653662	-0.0710484	-0.072427	-0.0696482	-0.0732392	-0.0716616	-0.0720372	-0.0713852	-0.0714106	-0.0723681	-0.0719338	-0.070381
O75083	WDR1	-0.00520216	0.425523	0.122713	0.240978	0.283859	0.306855	0.312728	0.407388	0.393402	0.156362	0.239446	0.260249	0.134948	0.488992	0.526293	0.261888	0.263196	0.281993	0.373665	0.423687	0.253475	0.36324	0.559109	-0.10689	-0.132783	0.0849653	0.213768	0.37278	0.378728	-0.107126	0.152683	-0.161131	0.461797	0.314205	0.253295	0.334609	0.540307	0.314796	0.0830478	0.368927	0.164407	0.447313	0.23356	0.090084	0.350452	0.152818	0.144395	-0.0621289
O75113	N4BP1	-0.071341	-0.0714452	-0.0705412	-0.0720964	-0.0721662	-0.0722391	-0.0722065	-0.0726154	-0.0718019	-0.0710434	-0.072789	-0.0713537	-0.0705533	-0.0704325	-0.0710548	-0.0713588	-0.0713768	-0.0722234	-0.0711924	-0.0705648	-0.0705155	-0.0709777	-0.0720632	-0.072483	-0.0735226	-0.0722858	-0.0666033	-0.0683238	-0.0740938	-0.0712652	-0.0701293	-0.0708997	-0.0700396	0.157508	0.132195	-0.584195	-0.0502491	-0.0710484	-0.072427	-0.0696482	-0.0732392	-0.0716616	-0.0720372	-0.0713852	-0.0714106	-0.0723681	-0.0719338	-0.070381
O75116	ROCK2	-0.339203	-0.200462	0.341189	-0.243483	-0.0774716	-0.0694111	0.111882	-0.280933	-0.378151	-0.414263	-0.445029	-0.306443	-0.333789	-0.65097	-0.529802	-0.247604	-0.161337	-0.306324	-0.382356	0.101048	-0.353961	-0.156062	-0.186974	-0.00560949	0.00498745	-0.219528	-0.0755665	-0.11373	-0.181872	-0.482191	-0.337525	-0.177346	-0.592415	-0.374576	-0.431269	-0.618557	-0.4579	-0.264555	0.0796672	-0.201735	-0.332071	-0.187301	-0.111411	-0.137829	-0.16592	0.0354798	-0.0357252	-0.142707
O75122	CLASP2	-0.205315	-0.240549	-0.362444	-0.379704	-0.253382	-0.373296	-0.422128	-0.539505	-0.342693	-0.248473	0.0113544	-0.77346	-0.648947	-0.409297	-0.614218	-0.733701	-0.493854	-0.723813	-0.880571	-0.237986	-0.0825467	-0.401162	-0.139745	0.141177	-0.031222	-0.287843	-0.168325	0.0311608	-0.212132	-0.302117	-0.132	-0.172835	-0.256079	-0.152652	0.00494658	0.577081	0.061805	-0.147652	-0.437282	-0.294877	-0.222675	-0.570426	-0.173148	-0.070947	0.0499085	-0.977661	-0.596649	-0.381502
O75131	CPNE3	0.0207233	0.0944801	-0.0762111	0.298886	-0.0403945	-0.0552713	0.025987	0.181339	-0.246596	-0.29578	-0.112975	-0.0740356	0.00177625	0.129317	0.0718484	-0.357921	-0.430226	-0.467816	0.218001	-0.0905812	0.251238	0.145909	0.210884	0.225398	-0.166249	0.434799	-0.0308542	-0.11373	0.0548123	0.210052	-0.0308488	0.335032	0.0848142	0.0187896	0.155107	0.12448	-0.14145	-0.202306	0.181964	0.0488668	0.210316	-0.0928527	0.0142627	0.342601	-0.125965	-0.0234909	0.187318	-0.0040637
O75146	HIP1R	0.221036	0.206382	0.221775	0.305311	0.316086	0.137763	0.327695	0.3426	-0.296198	0.210013	0.527137	-0.257168	0.210285	0.390392	0.202622	0.195196	0.0518856	0.496945	-0.0865439	0.0969627	0.101979	-0.0944913	0.112985	-0.0832333	0.152568	-0.0642114	-0.0365288	-0.0264213	0.081306	0.208065	0.311582	0.111664	0.158663	0.0286892	-5.90782e-18	0.199209	0.0932229	0.0980607	0.066485	0.0871827	0.22381	-0.00864593	0.211293	-0.0954029	-0.0414238	0.0115778	0.184195	-0.0314647
O75153	CLUH	-0.136543	0.08258	0.0719112	0.49322	-0.00697435	0.00309749	-0.0242419	0.215743	0.224826	0.301695	0.288909	0.0872363	-0.044321	-0.116768	-0.152773	-0.109869	-0.0672742	-0.292319	0.017342	0.0414974	-0.000425793	-0.0670151	-0.737624	-0.205116	0.157814	-0.239517	0.195697	0.096973	-0.0485239	-0.153627	-0.0275667	-0.15119	-0.155313	0.0447677	0.0456919	-0.674088	0.102807	0.0426965	0.455614	-0.0890414	0.39679	0.0769514	0.323004	-0.279438	0.355297	0.0790262	0.0156808	0.608611
O75155	CAND2	0.243109	0.3088	0.311414	0.165143	0.399249	0.143429	0.0573297	-0.426727	-0.711772	-0.940509	-0.711772	-0.994859	0.0570932	0.520277	0.216497	0.229103	0.350157	0.117295	-0.191508	0.286389	0.0974389	0.36688	-0.13075	-0.186375	0.430737	-0.102342	0.102248	0.20212	-0.299086	0.0894717	0.348461	0.0290838	0.265527	0.123118	-0.192349	-0.369874	-0.231752	0.0958508	-0.125576	-0.0453519	0.0581491	-0.117905	0.548673	-0.295718	-0.125965	-0.0678697	-0.189517	-0.161232
O75165	DNAJC13	-0.00667918	0.0128806	-0.085525	0.150711	-0.0267745	-0.0755768	0.000338619	0.127882	-0.106592	0.0434075	-0.00749264	0.388605	0.0849377	0.13545	0.073629	0.105286	0.3474	0.250804	0.303434	-0.0427127	0.123231	-0.0473081	0.131153	-0.0178253	0.212202	-0.0235494	0.0110228	-0.146372	-0.0845955	0.338694	-0.0111329	-0.00660233	-0.21213	-0.0593126	-0.09423	-0.09423	-0.0446242	-0.0518885	0.371658	0.0649516	0.398759	-0.23157	0.0999431	0.312136	0.154379	0.487488	-0.120834	-0.152386
O75170	PPP6R2	0.123854	0.225036	0.0229474	0.121859	0.174761	0.300957	0.162491	0.159527	0.154993	0.515821	0.18867	0.188881	0.222621	0.178655	0.289385	-0.188627	-0.106325	-0.178626	-0.0380489	0.403173	0.470945	0.232228	-0.259419	-0.261228	0.024078	-0.213622	0.0630792	0.0874509	0.050046	-0.10986	-0.0681067	-0.086016	-0.256079	0.415294	0.506849	0.127855	0.198038	0.266103	-0.0804826	0.0299795	0.0126512	-0.0220317	0.125179	-0.0548094	0.0450787	-0.20775	0.304635	0.299672
O75179	ANKRD17	-0.071341	-0.0714452	-0.0705412	-0.0720964	-0.0721662	-0.0722391	-0.0722065	-0.0726154	-0.0718019	-0.0710434	-0.072789	-0.0713537	-0.0705533	-0.0704325	-0.0710548	-0.0713588	-0.0713768	-0.0722234	-0.0711924	-0.0705648	-0.0705155	-0.0709777	-0.0720632	-0.072483	-0.0735226	-0.0722858	-0.0666033	-0.0683238	-0.0740938	-0.0712652	-0.0701293	-0.0708997	-0.0700396	-0.0667255	-0.0654228	-0.0757322	-0.0653662	0.2542	0.149069	-0.0696482	-0.0732392	-0.0716616	-0.0720372	-0.0713852	-0.0714106	-0.0723681	-0.0719338	-0.070381
O75208	COQ9	-0.071341	-0.0714452	-0.0705412	-0.0720964	0.180377	0.206577	-0.0729551	-0.0325333	0.374615	0.571899	0.406711	0.234685	0.216762	0.10666	0.281346	0.25694	0.192552	0.252901	0.193992	0.0493522	0.273209	0.244476	-0.00100475	0.0839481	0.683843	-0.155375	-0.050521	0.0168317	-0.239491	0.292826	0.310758	0.134686	0.161441	0.248912	0.315763	-0.381462	0.502423	-0.242257	-0.290557	0.459951	-0.0670245	0.395765	-0.159266	0.266761	0.797477	0.530953	0.510012	-0.070381
O75223	GGCT	-0.071341	-0.0714452	-0.31934	-0.261786	0.186686	0.219305	0.215087	0.623607	0.099142	0.134935	0.0758545	0.111809	0.323447	0.409052	0.562053	0.172093	0.153787	0.298206	0.419666	0.0816167	0.110551	-0.0333897	-0.0670634	0.184632	0.343107	0.192612	0.120661	0.166876	0.40374	-0.161302	0.734617	0.348759	0.193076	0.00113689	0.0895922	0.137199	0.116559	-0.0710484	-0.072427	-0.415764	0.454242	-0.0885655	-0.093932	-0.0713852	0.213048	0.134066	0.372088	-0.219139
O75251	NDUFS7	-0.191842	-0.206695	-0.00190163	-0.155645	-0.555712	-0.477218	-0.417372	-0.132456	-0.203133	-0.0484609	-0.171292	0.0301477	0.354652	-0.0784343	-0.118891	0.125869	-0.0881115	0.129083	0.349498	0.14677	-0.388019	0.171188	-0.423637	-0.428308	0.10965	-0.245914	-0.257522	-0.287203	-0.206217	-0.0695392	0.135596	-0.198263	-0.0891838	-0.0861205	-0.0349874	-0.646018	-0.242271	-0.231562	-0.257099	0.0607688	0.0607469	-0.0694569	0.13209	-0.283199	-0.428029	-0.558529	-0.284201	0.33682
O75298	RTN2	0.156331	-0.157674	-0.188055	-0.130182	-0.395253	-0.0115942	-0.527571	-0.237146	-0.0994655	-0.215891	-0.0211345	-0.416498	0.000960458	-0.018737	0.00332625	0.0802694	0.048339	0.114831	-0.066148	-0.138002	0.215625	-0.597199	0.0251808	-0.0450392	0.14239	0.202246	-0.213588	-0.166646	-0.200953	-0.51509	-0.128482	-0.0518506	0.138284	0.368745	0.368866	-0.132922	0.0442927	-0.0208256	0.0637456	0.041413	0.074657	-0.118076	-0.224128	-0.259094	-0.0714106	-0.0723681	-0.0719338	-0.055118
O75306	NDUFS2	0.279837	0.179085	0.331616	0.217135	-0.300833	-0.15372	0.0088076	0.176325	0.205399	0.154489	-0.198775	0.193233	0.3944	0.216686	-0.0885941	0.15069	0.10018	0.171035	0.163373	0.520409	-0.120248	0.46903	0.0216507	0.00818581	0.639306	0.131552	0.512163	-0.135365	0.0839795	0.029517	0.36257	0.0426881	0.228341	0.269812	0.364701	-0.0245255	0.0319026	0.386235	0.367835	0.00262289	0.0552399	0.334694	0.224039	0.136478	-0.0169842	-0.0600355	0.105172	0.638107
O75312	ZPR1	0.0630479	-0.0351656	0.153984	0.0663947	0.14377	0.125364	0.200113	0.106834	0.180943	0.173188	0.143297	0.116956	0.260258	0.160786	0.215476	0.103507	0.0690878	0.0991347	0.00471698	0.0678206	0.0463061	-0.0200129	0.240302	0.410606	0.315308	0.417406	0.0667539	0.127236	-0.00252325	0.264763	0.174553	0.304415	0.212492	0.545571	0.388746	0.154044	0.355527	0.110504	0.259595	0.111177	-0.0493798	0.126329	-0.014927	0.145311	-0.253049	-0.196105	-0.137724	0.0946399
O75323	NIPSNAP2	0.165162	0.184311	0.0926582	0.170611	0.0424973	0.0809755	-0.145976	0.415558	0.175341	0.10919	0.206996	0.26983	0.237389	0.27533	0.432122	0.355644	-0.068714	-0.00673018	0.204369	0.237527	-0.193879	-0.190014	0.0466807	0.364882	0.539369	0.672975	0.398072	0.190398	0.23761	0.271358	0.386526	0.389931	0.273192	0.283884	0.295992	0.135221	0.244729	0.114431	-0.369512	0.0333083	0.302855	0.324856	0.401254	0.354222	0.0386534	0.273784	0.427849	0.353478
O75334	PPFIA2	0.0434134	0.133353	0.111015	0.00200401	0.0295314	0.0804746	0.0562238	-0.375862	-0.112463	-0.056521	-0.108278	-0.115474	-0.0865846	-0.479551	-0.322298	0.0485293	0.100013	-0.0397533	-0.0842154	0.0920223	0.00880285	0.0116376	0.0287941	0.0626907	0.0100068	0.131113	0.140047	0.10143	0.0259456	-0.211233	0.00868708	-0.0723586	0.0803475	0.140565	-0.0497638	0.145257	0.0845658	0.0681644	0.0469948	-0.304028	0.136844	-0.279826	0.23662	0.0664673	0.355297	0.0790262	0.0156808	-0.100242
O75340	PDCD6	0.657493	0.727303	0.520797	0.940544	0.481362	0.379475	0.357496	0.694052	0.497658	0.690242	0.700009	0.624623	0.194385	0.500001	0.303324	0.374715	0.724151	0.495924	0.496347	0.575758	0.429759	0.405769	0.754258	0.708517	0.376797	0.524138	0.637808	0.777388	0.404992	0.973409	0.631226	0.893531	0.698773	0.479167	0.228229	0.684294	0.998686	0.451183	0.869229	0.0861586	0.611779	0.47059	0.326803	0.299003	0.519789	0.789707	0.71895	0.349225
O75347	TBCA	-0.472905	-0.381569	-1.06998	-0.417823	-0.209457	-0.221821	-0.269784	-1.25928	-0.232965	-0.286086	0.0102739	-1.05338	-0.0422207	0.0123366	-0.0308107	-0.296565	-0.151431	-0.333112	-0.837249	-0.437958	-0.245706	-0.989326	-0.010292	0.189907	0.10772	-0.599312	-0.197789	-0.0297921	-0.718361	-0.232867	-0.399208	-0.765097	-0.274721	-0.119451	-0.201371	0.0950294	-0.182897	-0.206572	-0.502882	0.0239917	-0.925542	-0.401565	-0.576735	-0.125044	-0.195778	-0.78616	-0.651119	-0.554089
O75348	ATP6V1G1	-0.0558726	0.502725	-0.299523	-0.0350398	0.363811	0.493566	0.539715	0.106366	0.0955882	0.179409	0.107986	0.0518933	0.295979	0.17485	0.248725	0.321571	0.111788	0.240094	-0.048425	0.155751	-0.0434323	0.13191	0.381328	0.322372	-0.151702	0.0728447	0.282684	0.0593287	-0.340663	0.2021	0.358178	0.185451	0.359069	0.304493	-0.0773968	-0.204435	0.00299491	0.279901	-0.266508	-0.0315126	-0.537812	0.453119	0.0514562	0.00341544	0.015172	-0.391872	-0.36939	-0.219139
O75351	VPS4B	-0.0636011	0.0266811	0.249979	-0.0707024	0.0255871	0.13935	0.297289	-0.748071	0.363319	0.354924	0.349455	-0.343845	0.163703	0.0836211	0.0764748	0.330732	0.522967	0.34393	-0.487837	0.00919848	0.102963	-0.234576	0.163097	-0.0229969	-0.0707151	-0.526294	-0.0632208	-0.146372	-0.00493716	0.0358987	-0.188495	-0.18039	0.018952	0.105847	-0.0414308	0.135221	0.130374	0.247811	-0.461194	-0.0642988	-0.282628	-0.126187	0.222162	0.00665389	0.364384	-0.49733	-0.341512	-0.0194693
O75352	MPDU1	-0.563745	-0.470782	-0.393491	-0.243483	-0.304166	-0.203832	-0.21959	0.155124	-0.154418	-0.38633	-0.147533	0.264281	-0.457475	-0.625847	-0.457926	-0.313508	-0.34442	-0.76246	0.0124369	-0.498668	-0.544577	-0.625588	-0.0712829	-0.369298	-0.347967	-0.188666	0.0136684	-0.187553	-0.0626677	-0.0184768	-0.32043	-0.191836	-0.0307939	-0.46827	-0.459842	-0.288304	-0.588792	0.00526932	0.487203	-0.0858219	0.402728	0.463463	-0.0608521	0.0308505	0.1016	0.0752739	0.0438992	-0.335979
O75365	PTP4A3	-0.071341	-0.0714452	-0.0705412	-0.0720964	-0.0721662	-0.0722391	-0.0722065	-0.0726154	-0.0718019	-0.0710434	-0.072789	-0.0713537	-0.0705533	-0.0704325	-0.0710548	-0.0713588	-0.0713768	-0.0722234	-0.0711924	-0.0705648	-0.0705155	-0.0709777	-0.0720632	-0.072483	-0.0735226	-0.0722858	-0.0666033	-0.0683238	-0.0740938	-0.0712652	-0.0701293	-0.0708997	-0.0700396	-0.0667255	-0.0654228	-0.0757322	-0.0653662	-0.0710484	-0.072427	-0.0696482	-0.0732392	-0.0716616	-0.0720372	-0.234419	-0.0714106	-0.0723681	-0.0719338	-0.070381
O75367	MACROH2A1	0.00543157	-0.256341	-0.169889	0.0715045	0.0424973	-0.0874073	-0.0564418	-0.0735042	0.0518933	-0.00540019	-0.0179749	-0.275194	0.0293421	0.265935	0.126955	0.0374917	-0.0769529	-0.22388	-0.0766769	0.011877	0.420812	-0.154208	0.244828	0.16758	-1.63972	0.184187	0.151514	0.0858776	0.0462689	-0.0388316	0.233768	-0.14208	0.355216	0.00543198	0.0806766	0.590783	0.201261	0.296847	0.247902	0.18015	-0.0197257	-0.0569839	0.147564	0.0657528	-0.0740979	0.0815748	0.0525467	0.0304858
O75368	SH3BGRL	0.651131	1.00042	0.636389	0.854496	0.531664	0.313524	0.385099	0.625745	0.599542	0.102892	0.280001	0.387833	0.374192	0.590535	0.581931	0.304962	0.491061	0.389288	0.301428	0.40058	0.468163	0.217461	0.0959328	0.186563	0.81375	0.0442225	0.0811059	0.8001	0.525847	0.657397	0.438658	0.627152	0.224301	0.495981	0.441609	0.0758621	0.361338	-0.00325133	0.936925	0.330738	0.324664	0.861615	-0.114234	0.103071	0.0373365	0.201954	0.121367	0.557753
O75369	FLNB	-2.10786	-2.05093	-2.20202	-2.17557	-0.414803	-0.577356	-0.495507	-0.315075	-0.472013	-0.504205	-0.324754	-0.338818	-0.540526	-0.664182	-0.661725	-0.868689	-0.642801	-0.811646	-0.501113	-0.511891	-0.35218	0.14329	-0.496324	-0.445691	-0.50433	-0.333452	-0.982177	-0.160502	-0.923388	-0.489117	-0.800935	-0.485957	-0.725787	-0.408246	-0.551774	-0.654657	0.0278822	-0.901959	-0.665834	-0.184409	-0.372407	-0.599958	-0.501576	-0.33664	-0.544152	-0.357218	-0.148616	-2.05048
O75380	NDUFS6	0.397367	0.0595662	0.241743	0.322112	-0.409885	-0.556553	0.141997	-0.29578	0.0870678	-0.157028	-0.219552	-0.110777	0.726047	0.287276	-0.0254269	0.047735	0.146203	0.199008	0.135866	0.121396	-0.0956873	-0.0386479	-0.17387	-0.110733	0.370279	0.07134	0.296042	0.146776	-0.0285132	0.121415	0.414687	-0.230691	0.240571	0.309508	0.296838	0.164384	0.129451	0.284853	0.157841	0.358209	-0.142942	0.30649	0.385389	0.288779	0.23887	-0.214757	0.0490563	0.523146
O75382	TRIM3	-0.316558	-0.0113122	0.201403	-0.39656	-0.229581	-0.113438	0.0768953	-0.0392073	-0.127674	-0.321636	-0.120397	0.0165912	-0.276927	-0.0328279	-0.325265	-0.213776	-0.0964171	-0.172755	-0.12649	-0.120542	-0.432595	-0.14155	-0.534977	0.069717	-0.135577	-0.231989	-0.525511	-0.77061	-0.542595	-0.382201	-0.655166	-0.453507	-0.564806	-0.524967	-0.522455	-0.102658	-0.196544	-0.0478019	-0.247945	-0.396426	-0.0365949	-0.220639	-0.102692	-0.215703	-0.240093	-0.0518957	-0.258363	0.0387791
O75390	CS	0.0750285	0.13088	-0.181932	0.194818	0.118813	0.303694	-0.0548863	-0.0417238	0.285687	0.22187	0.307533	0.184526	0.259599	0.263562	0.241684	0.361116	-0.0707078	0.0860173	0.289755	0.269398	0.364676	0.136561	0.241254	0.114632	0.527414	0.0669839	0.21891	0.296889	0.292738	0.397976	0.420719	0.145015	0.116065	0.223258	0.298486	0.648349	0.139594	0.116909	0.576155	-0.102492	0.264202	0.301876	0.172228	0.160705	-0.22362	0.186834	0.334897	0.632945
O75396	SEC22B	0.0314353	0.10934	-0.0132219	0.105291	-0.457303	-0.119857	-0.0634192	-0.422303	-0.0247146	0.343461	0.208209	-0.736435	0.0996402	0.333606	0.243947	-0.0306484	0.194497	0.033064	-0.400613	0.046704	0.107965	-0.0184682	0.158408	0.00415083	-0.247737	-0.117443	0.0572182	-0.103991	-0.462835	0.493274	0.20455	-0.196659	0.318517	0.228416	-0.141484	0.139298	-0.0360951	0.24588	0.0358998	0.0239917	-0.112275	0.237334	0.240563	-0.0662596	0.618644	-0.473549	-0.205449	-0.209476
O75400	PRPF40A	0.187605	0.155389	-0.0396861	0.24858	-0.0465975	-0.202519	-0.411323	0.0908658	0.276685	0.307688	0.305908	0.315575	0.0234131	0.122816	0.0695251	-0.00487546	-0.0373822	-0.0225454	0.00313201	-0.0334103	0.314148	-0.0395871	0.0331016	-0.123537	-0.128865	-0.126135	0.347727	0.378522	0.416939	0.242404	0.244647	0.156504	0.152729	0.0583855	0.259119	0.121049	0.161163	-0.0882697	-0.222182	-0.0877399	0.0258294	-0.229624	0.15929	0.0498545	-0.725107	-0.335717	-0.576688	-0.111805
O75431	MTX2	-0.0848627	-0.0973903	-0.223922	-0.442183	-0.215184	0.0142136	-0.453701	-0.299591	-0.0718019	-0.0710434	-0.072789	-0.0713537	0.181904	-0.118538	-0.0286753	-0.503211	-0.601078	-0.655854	-0.694716	-0.542895	-0.423123	-0.605054	-0.392203	-0.62674	-0.0932579	-0.777899	-0.0404187	-0.0524156	-0.444919	0.0534512	0.487761	-0.143834	0.170444	-0.0871633	0.0753071	-0.669409	-0.433837	-0.160972	-0.477038	-0.302479	-0.0896163	0.230178	0.16906	-0.247429	-0.42111	-0.305125	-0.391213	0.298403
O75436	VPS26A	-0.0178997	0.291889	-0.0876791	0.0824126	0.212606	0.0584396	0.0560293	0.224198	0.0340484	0.257735	-0.035961	0.529813	0.0928693	0.187288	0.0422953	0.064277	0.0806655	-0.141531	0.181666	-0.0316396	0.222067	0.494093	0.12536	0.0792744	0.233937	0.116487	0.15675	0.138542	0.176952	0.00382089	-0.15587	0.0742247	-0.130646	-0.00110604	0.238394	0.0181623	0.299092	0.0866518	-0.237143	-0.487662	-0.388313	-0.266277	0.0880643	-0.321911	0.114876	0.156335	0.22161	0.264483
O75438	NDUFB1	0.301067	0.0353136	0.395324	0.0729394	0.0978882	0.30061	0.1274	0.145705	0.262821	-0.161374	-0.16982	-0.118774	0.643403	-0.557326	-0.212481	0.0423269	-0.0190066	0.0714055	0.313772	0.166481	-0.550375	-0.973579	0.175324	0.354669	0.256151	0.199345	0.611552	0.23238	-0.232982	0.0823236	0.629247	-0.00348193	0.348072	0.121128	0.219703	-0.586455	-0.27106	0.00575203	0.123445	-0.200057	-0.0725039	0.206058	-0.0438691	-0.0807304	-0.411339	-0.186433	-0.308086	0.405247
O75439	PMPCB	0.672795	0.483154	0.492767	0.411853	0.401812	0.479574	0.104932	0.39952	0.492203	0.292997	0.554461	0.104287	0.543724	0.464126	0.52205	0.792113	0.335466	0.369864	0.376771	0.564982	0.446894	0.392646	0.311021	0.290574	0.39568	0.253873	0.669501	0.557888	0.432871	0.188622	0.492884	0.601861	0.27208	0.464025	0.860887	-0.0983539	0.519698	0.439602	0.611154	0.585024	0.483593	0.440875	0.572025	0.27302	0.3364	0.360378	0.582577	0.760669
O75475	PSIP1	-0.438354	-0.212263	-0.0839564	-0.821798	-0.171283	-0.131295	-0.131769	-0.4485	-0.374848	-0.57912	-0.407613	-0.764623	-0.461	-0.481961	-0.470076	-0.69429	-0.650248	-0.806992	-0.901539	-0.597849	-0.850852	-1.03342	-0.0913708	-0.328411	-0.643546	-0.0370415	-0.441039	-0.310601	-0.630269	-0.944636	-0.0496623	-1.26364	-0.497332	-0.513298	-0.205243	1.19946	-0.398513	-0.661118	-1.18662	-0.623847	-0.703384	-0.312563	-0.351234	-0.614905	-0.422191	-0.512308	-0.580649	-0.942121
O75477	ERLIN1	0.393494	0.337319	-0.0705412	0.0756781	0.00427495	0.0199311	0.166142	-0.174757	0.220809	0.0960746	0.299376	-0.107086	0.0561111	-0.132921	-0.0308107	0.117313	0.146957	0.118592	0.0610637	-0.0610307	0.174211	-0.298281	0.162528	-0.072339	0.0220398	0.295255	-0.0375613	0.521766	-0.0751449	0.112925	0.101345	-0.096513	0.138129	-0.0255585	0.0784177	-0.144464	0.328708	-0.00503955	-0.271119	-0.232471	0.0455502	0.577148	0.150843	0.481376	0.6743	0.0737896	0.235578	0.0575971
O75489	NDUFS3	0.232212	0.0769979	0.292677	-0.00887753	0.000490986	0.1786	0.289623	0.175207	0.218645	0.197086	-0.279227	0.256737	0.388814	0.234258	-0.00160097	0.202971	0.244293	0.2544	0.12128	0.363591	-0.0585416	0.319336	-0.0244843	-0.140203	0.446375	0.0849653	0.213768	-0.265078	-0.0394229	0.192834	0.360583	-0.0903405	0.173997	0.306875	0.419961	0.00464362	0.0812038	0.303261	0.383541	0.154588	0.131113	0.369266	0.430509	0.143112	-0.155011	-0.102367	0.00177182	0.400003
O75494	SRSF10	0.104817	-0.157062	-0.272138	-0.0474819	0.387585	0.341011	0.273099	0.285899	0.0361983	0.0309909	0.157893	-0.0798302	0.00456233	0.0820524	-0.0284114	0.0676084	-0.034027	-0.0053544	0.129066	0.237914	0.260863	0.0261476	0.0161922	0.147325	0.162326	0.123226	-0.0218967	0.047945	0.0647548	-0.00792833	-0.166021	-0.0293153	0.0617675	-0.0540283	0.122199	0.125668	0.0778342	0.0374869	0.0682256	0.181175	0.357998	0.0882549	-0.0286318	0.254728	-0.169475	0.241729	0.158261	-0.499132
O75503	CLN5	-0.071341	-0.0714452	-0.0705412	-0.0720964	-0.0721662	-0.0722391	-0.0722065	-0.0726154	-0.0718019	-0.0710434	-0.072789	-0.0713537	-0.0705533	-0.0704325	-0.0710548	-0.0713588	-0.0713768	-0.0722234	-0.0711924	-0.0705648	-0.0705155	-0.0709777	-0.0720632	-0.072483	-0.0735226	-0.0722858	-0.0666033	-0.0683238	-0.0740938	-0.0712652	-0.0701293	-0.0708997	-0.0700396	-0.0667255	-0.0654228	-0.0757322	-0.0653662	-0.0710484	-0.072427	-0.0696482	-0.0732392	-0.0716616	-0.0720372	0.0109002	-0.0714106	-0.0723681	-0.0719338	-0.070381
O75521	ECI2	0.10548	0.286188	0.0433908	-0.0693815	0.5945	-0.25242	-0.195173	0.24498	-0.0543437	-0.117615	0.165122	0.0547081	0.25642	0.175947	0.535204	-0.244344	-0.0801748	-0.106575	-0.0168939	-0.0729409	0.210179	0.0562297	0.164057	-0.0651353	-0.00308619	0.129622	-0.056303	0.0901517	0.152826	-0.232867	-0.0163069	0.0426881	0.0644109	-0.037224	0.45188	-0.189841	0.0128664	-0.120382	-0.123574	0.152097	0.00603866	-0.0540031	0.076826	-0.120528	-0.272143	0.013675	-0.444549	0.588146
O75531	BANF1	0.337328	0.716506	-0.475891	0.570469	1.36295	0.0723876	0.204549	-0.64563	0.0550064	0.786352	0.846514	0.186511	1.10821	0.611275	1.29937	0.66662	0.342611	0.535992	0.431887	1.25615	1.45481	0.405769	0.268153	0.966729	-0.0329168	0.770952	0.588831	0.444061	0.558926	0.7824	0.887136	1.17432	1.2211	0.743073	0.850985	0.174846	1.11605	1.25414	0.421817	0.996712	-0.67029	0.0864451	-0.0431477	0.61086	0.284129	-0.133011	0.707685	0.33136
O75533	SF3B1	-0.154258	-0.0735015	-0.0556309	0.0824126	-0.135581	-0.14353	-0.0795783	0.0841933	-0.0725909	0.0234311	-0.058831	-0.224143	0.0304559	-0.152467	0.0149899	0.156583	0.0455373	0.068223	0.0463035	-0.169819	-0.132156	-0.315947	0.105403	-0.0315004	-0.326141	0.0988778	0.0950668	0.143323	-0.148098	0.0584	0.105895	0.0680547	0.181569	0.0261619	0.173311	-0.0259847	0.0673757	0.0657313	-0.135514	0.0310702	0.103778	0.061558	0.0913646	-0.0255453	0.0424968	0.241729	0.190396	-0.0725645
O75534	CSDE1	-0.241345	-0.670024	-0.539639	-0.468308	-0.341853	-0.347128	0.174873	-0.209775	-0.461405	-0.406881	-0.456051	-0.178807	-0.413186	-0.358929	-0.508737	-0.511778	-0.41138	-0.519038	-0.665895	-0.642606	-0.52679	0.104248	-0.259419	-0.376902	-0.0561111	-0.397656	-0.376796	-0.601534	-0.707048	-0.581073	-0.487114	-0.663177	-0.564547	-0.472303	-0.434776	-0.734814	-0.491866	-0.541483	-0.742162	0.02873	-0.248928	-0.301575	0.308818	-0.290668	-0.161883	-0.390535	-0.33481	-0.403569
O75563	SKAP2	-0.071341	-0.0714452	-0.0705412	-0.0720964	-0.0721662	-0.0722391	-0.0722065	-0.0726154	-0.0718019	-0.0710434	-0.072789	-0.0713537	-0.0705533	-0.0704325	-0.0710548	-0.0713588	-0.0713768	-0.0722234	-0.0711924	-0.0705648	-0.0705155	-0.0709777	-0.0720632	-0.072483	-0.0735226	-0.0722858	-0.0666033	-0.0683238	-0.0740938	-0.0712652	-0.0701293	-0.0708997	-0.0700396	-0.0667255	-0.0654228	-0.0757322	-0.0653662	-0.106264	0.266167	-0.0696482	-0.0732392	-0.0716616	-0.0720372	-0.0713852	-0.0714106	-0.0723681	-0.0719338	-0.070381
O75569	PRKRA	-0.23914	-0.0915357	0.275563	-0.0924059	-0.341853	0.00575952	-0.235286	-0.636679	-0.181379	-0.135744	-0.184548	-0.295914	-0.294387	-0.0934745	-0.184181	-0.204229	-0.227416	-0.285145	-0.635403	-0.369231	-0.212607	-0.767065	-0.395466	-0.34695	-0.0634126	-0.515747	-0.149384	-0.24672	-0.493944	-0.366965	-0.254397	-0.414891	-0.195532	-0.145211	-0.126947	0.0992415	-0.252001	-0.208	-0.507987	-0.582737	-0.508309	-0.317168	-0.293459	-0.669668	-0.248263	-0.371085	-0.381864	-0.114751
O75592	MYCBP2	-0.071341	-0.0714452	-0.0705412	-0.0720964	-0.0865308	-0.198316	-0.0650245	0.251132	-0.0559713	-0.12593	-0.0275178	0.0872818	0.00900736	-0.0347743	-0.0919668	-0.0098326	0.377385	0.147263	0.131668	0.132887	0.462136	0.308984	0.0744624	0.223854	0.164766	0.218316	0.132187	-0.00373143	0.0498088	-0.0574563	0.159756	0.0786268	-0.0204854	-0.46682	-0.218295	0.108256	0.074361	0.183176	0.596539	-0.0648078	0.294099	0.0981429	0.0212805	0.186384	0.461894	0.376931	0.455052	-0.070381
O75607	NPM3	-0.071341	-0.0714452	-0.0705412	-0.0720964	-0.0721662	-0.0722391	-0.0722065	-0.0726154	-0.0718019	-0.0710434	-0.072789	-0.0713537	-0.0705533	-0.0704325	-0.0710548	0.557491	0.382584	0.586699	0.42675	-0.0705648	-0.0705155	-0.0709777	-0.0720632	-0.072483	-0.0735226	-0.0722858	-0.0666033	-0.0683238	-0.0740938	-0.0712652	-0.0701293	-0.0708997	-0.0700396	-0.0667255	-0.0654228	-0.0757322	-0.0653662	-0.0710484	-0.072427	-0.0696482	-0.0732392	-0.0716616	-0.0720372	-0.0713852	-0.0714106	-0.0723681	-0.0719338	-0.070381
O75608	LYPLA1	0.127645	-0.00130081	0.283048	0.702668	-0.0242849	0.310524	0.0573297	0.0395994	0.291877	0.310962	0.179532	0.406175	0.48421	0.552355	0.816011	0.198427	0.144433	0.218668	0.500926	0.249966	0.463156	-0.0244272	0.0385649	0.0503628	0.765328	0.464713	0.0189184	0.403158	0.142047	0.101995	0.249555	0.409942	0.148951	0.118247	0.291491	0.276194	-0.354005	-0.0506159	0.641888	-0.0993097	0.1755	-0.0840726	0.206066	0.562666	-0.23186	0.0596636	0.533736	0.0575971
O75629	CREG1	-0.071341	-0.0714452	-0.0705412	-0.0720964	-0.0721662	-0.0722391	-0.0722065	-0.0726154	-0.0718019	-0.0710434	-0.072789	-0.0713537	-0.0705533	-0.0704325	-0.0710548	-0.0713588	-0.0713768	-0.0722234	-0.0711924	-0.0705648	-0.0705155	-0.0709777	-0.0720632	-0.072483	-0.0735226	-0.0722858	-0.766085	-1.12581	-0.0872046	-0.0712652	-0.0701293	-0.0708997	-0.0700396	-0.0667255	-0.0654228	-0.0757322	-0.0653662	-0.0710484	-0.072427	-0.0696482	-0.0732392	-0.0716616	-0.0720372	-0.0713852	-0.0714106	-0.0723681	-0.0719338	-0.070381
O75643	SNRNP200	0.116299	-0.0223721	-0.0694786	0.115253	-0.0418456	-0.135002	-0.166461	0.0564799	0.0763718	-0.0549547	0.032697	-0.0790869	-0.00861696	0.0372139	0.0393525	-0.0459408	-0.20793	-0.177372	-0.015837	0.0760847	0.268984	-0.0486676	0.164057	0.264884	-0.330143	0.32083	0.0630792	0.0882101	0.172932	-0.035541	0.0799864	0.023278	0.0994448	0.0363883	0.138343	0.147545	0.0508773	0.10991	0.149646	0.131003	0.12008	-0.0569839	0.0375954	-0.00839197	-0.0182535	0.0911762	0.11787	0.0113894
O75663	TIPRL	-0.071341	-0.0714452	-0.0705412	-0.0720964	0.155781	0.0158034	0.273099	0.0619733	-0.102596	-0.0179835	-0.112054	-0.200778	0.0590763	0.0001479	-0.191565	-0.169374	0.284145	0.0835497	0.252363	-0.030963	0.0983805	-0.204854	0.0666567	0.102341	0.4762	0.234444	0.0737426	0.0728566	0.147935	0.173636	-0.0889562	0.289758	0.0615756	-0.0425784	0.0476963	0.0534853	0.171947	0.129725	0.497241	0.0268543	0.0393512	0.104936	0.148495	-0.0644185	-0.149314	-0.12078	0.00553185	-0.070381
O75688	PPM1B	-0.184121	-0.312359	-0.150699	-0.109114	0.603856	0.858536	0.925509	-0.11267	0.501742	0.543633	0.375016	0.141922	-0.130529	-0.141919	-0.137916	-0.0713588	-0.0713768	-0.0722234	-0.0711924	-1.03036	-0.948351	-0.639694	-0.358353	0.139646	-0.0643584	0.683679	-0.445687	-0.250551	-0.474044	-0.190611	-0.167801	-0.306171	-0.404458	0.666607	-0.645129	0.324031	0.856264	-0.130343	-0.178964	-0.14317	-0.202641	-0.0363787	-0.352007	-0.61184	-0.259485	-0.0833722	-0.269298	0.136531
O75691	UTP20	-0.0349715	0.321681	0.32223	-0.0550699	0.273685	0.542423	0.615027	0.32815	-0.128684	0.274048	0.307533	0.21888	-0.364596	-0.411475	-0.407522	0.173412	0.152467	0.0357603	0.146655	-0.271185	-0.293254	-0.10787	-1.14053	-0.774169	-0.46302	-0.926133	-0.674847	-0.491896	-0.117676	-0.436092	-0.43514	-0.405616	-0.587463	-0.189282	-0.0386976	-0.150188	0.099623	0.0408446	0.213499	-0.0208616	-0.0179105	-0.0778074	-0.198685	-0.340309	-0.217077	0.0736007	0.0756419	0.396911
O75694	NUP155	0.233974	0.278938	0.213359	0.494339	0.149562	0.152058	0.109535	0.075834	0.285687	0.329565	0.187261	-0.00504765	0.240897	0.429024	0.355914	0.117326	0.0793573	-0.0266895	0.0211045	0.132887	0.294852	0.144902	0.203745	0.228463	-0.00568232	0.126802	0.259827	0.264622	0.171779	0.15129	0.272942	0.285301	0.440774	0.146951	0.1654	-0.132922	0.280603	0.44179	0.272992	0.0469899	0.0932195	-0.0301735	-0.0122309	0.305486	0.108749	0.148538	0.225337	0.0646619
O75718	CRTAP	-0.071341	-0.0714452	-0.0705412	-0.0720964	-0.0721662	-0.0722391	-0.0722065	-0.0726154	-0.0718019	-0.0710434	-0.072789	-0.0713537	-0.0705533	-0.0704325	-0.0710548	-0.0713588	-0.0713768	-0.0722234	-0.0711924	0.0986803	0.219585	0.379821	-0.0720632	-0.072483	-0.0735226	-0.0722858	-0.0666033	-0.0683238	-0.0740938	-0.0712652	-0.0701293	-0.0708997	-0.0700396	-0.0667255	-0.0654228	-0.0757322	-0.0653662	-0.0710484	-0.072427	-0.0696482	-0.0732392	-0.0716616	-0.0720372	-0.0713852	-0.0714106	-0.0723681	-0.0719338	-0.070381
O75746	SLC25A12	-0.096146	0.0286519	0.0673743	-0.249769	0.167453	0.165351	-0.298139	0.189072	-0.0228135	0.124931	-0.130015	-0.0823963	0.127929	0.295838	0.153437	0.049681	-0.225657	0.0437333	-0.0530909	-0.0443859	-0.0460341	0.0655582	-0.0778924	0.175151	0.287164	0.338954	0.0121444	-0.0868539	-0.217947	-0.366965	0.155815	-0.163408	-0.0423184	-0.24452	-0.0377647	0.158951	0.0234552	-0.165989	-0.301253	-0.0639487	-0.230597	-0.232733	-0.242671	-0.359004	-0.380504	0.153577	-0.0201146	0.17347
O75781	PALM	-0.103267	0.397511	-0.0414302	-0.538726	0.135001	-0.0529024	-0.129098	0.0912018	-0.162196	-0.368887	-0.0768771	-0.0587713	-0.205599	0.855588	0.466995	-0.174883	0.00019669	-0.0616176	0.385795	-0.117643	-0.161907	0.0787038	-0.229743	-0.238119	-0.0930179	-0.160854	-0.217212	-0.285531	-0.188574	-0.152215	-0.0498206	-0.147452	-0.492484	-0.144479	-0.441161	0.257274	-0.174066	-0.482536	-0.207184	-0.353536	-0.246603	-0.34559	-0.253387	-0.590445	-0.107863	-0.130235	-0.150883	-0.101488
O75821	EIF3G	0.287936	0.13088	0.310671	0.0911625	-0.00907461	0.0342674	0.0480922	-0.401759	0.279435	0.216066	0.324892	0.113671	0.30324	0.0454076	0.202753	0.499108	0.532294	0.422062	0.44666	0.38432	0.328637	0.0386615	0.397804	0.292143	-0.357924	0.151116	0.505633	0.518406	0.705398	0.0655518	0.263652	0.222127	0.308233	0.288979	0.414358	-0.201773	0.173384	0.383604	0.342328	0.551363	0.563834	0.376389	0.493007	0.503593	0.503613	0.46489	0.475271	0.259851
O75822	EIF3J	-0.071341	-0.0714452	-0.0705412	-0.0720964	0.131577	0.126138	0.258043	-0.586354	0.202553	0.475043	0.0186626	-0.138656	-0.000763381	-0.180069	-0.115838	0.164187	0.357616	0.425593	0.244465	-0.0241071	0.00105339	-0.525757	-0.132284	-0.402251	-0.00889083	0.156925	0.0649774	-0.128636	-0.363248	-0.355682	0.108268	-0.528218	-0.0088131	0.14796	0.0882009	-0.478013	-0.217587	0.132504	-0.130039	-0.0674708	1.51668	-0.21898	-0.0116303	-0.217296	-0.0731266	-0.0453401	-0.137372	-0.070381
O75828	CBR3	0.0544856	0.0924961	0.0272878	0.259798	-0.00232916	0.175548	0.121348	-0.151721	0.099142	0.0738547	0.032697	0.948194	-0.228663	-0.194758	-0.267678	-0.234576	0.126012	0.217361	0.79938	0.561733	0.191804	0.688444	0.126931	-0.240998	0.33741	0.641602	-0.00846179	0.0947709	0.514103	0.537902	-0.367002	0.236805	-0.0362324	0.0638425	-0.260424	0.320774	-0.0346102	-0.0260986	0.14832	-0.03273	0.487863	0.260474	0.0922902	0.60881	0.527112	0.525388	0.320586	0.122849
O75832	PSMD10	-0.269535	-0.294464	-0.0342297	-0.157328	-0.179167	-0.356673	-0.463982	0.0282436	-0.357521	-0.169229	-0.21626	0.104287	-0.146774	-0.0213556	-0.128787	-0.239118	-0.20725	-0.0960246	-0.133428	-0.223032	-0.11603	-0.317681	-0.260843	-0.0755042	0.0503184	-0.0164504	-0.247891	-0.165278	-0.100467	-0.287559	-0.160246	-0.179265	-0.171264	-0.162691	-0.0968337	0.0343708	-0.23037	-0.307282	-0.250376	-0.0873965	-0.0637552	-0.192765	-0.131277	-0.257858	-0.197222	0.102859	-0.167193	-0.0387894
O75843	AP1G2	0.118786	0.161735	0.409032	0.491488	0.504498	0.634257	0.43734	0.296933	0.177523	0.585443	0.254524	0.557464	0.368865	-0.151108	0.09226	0.828838	0.756791	0.717966	0.662539	0.607538	0.252127	0.738195	-0.201979	-0.385282	-0.113238	-0.0163919	0.2658	0.306557	0.527493	0.529967	-0.0535061	0.367809	-0.118998	0.20316	0.317333	0.307484	0.422082	0.413725	1.11615	-0.00219763	0.348142	-0.0861578	-0.154853	0.844624	0.315392	0.264259	0.429642	0.259684
O75844	ZMPSTE24	-0.285898	-0.162514	0.160417	0.118293	-0.356688	-0.0874073	0.192373	0.292487	-0.00657404	0.142454	0.0454166	0.0036204	-0.166588	-0.434084	-0.295209	-0.297831	0.177686	0.0495544	-0.370535	-0.0515936	-0.166391	-0.154208	-0.0587277	-0.570879	-0.204678	-0.0405648	-0.0167069	-0.275238	-0.159312	-0.267444	-0.182728	-0.112891	-0.116552	0.149272	-0.106763	-0.573126	-0.30024	-0.0422647	-0.114882	-0.126359	-0.181446	0.111909	-0.00174538	-0.22629	0.0133281	-0.0185566	0.0558535	-0.0850529
O75874	IDH1	-0.319528	-0.517498	-0.216615	-0.559866	-0.297971	-0.0647581	-0.123928	0.25972	-0.385244	-0.329936	-0.447528	0.0872363	-0.145215	-0.292149	-0.449043	-0.195229	-0.0093697	0.38086	-0.128029	0.053001	-0.260959	0.322045	-0.168242	-0.597874	-0.378912	0.118623	-0.247112	0.0602838	0.185718	-0.415209	-0.264197	-0.15814	-0.292926	-0.343783	-0.201371	0.481992	-0.367317	-0.167024	-0.623955	-0.12463	-0.336827	-0.187301	-0.152675	-0.650615	-0.139554	0.200113	0.147988	-0.27406
O75879	GATB	-0.071341	-0.0714452	-0.0705412	-0.0720964	-0.0961974	-0.65923	-0.534366	0.272442	-0.914655	-0.183982	-0.84268	0.268535	-0.736547	-0.819708	-1.04202	-0.418192	-0.396885	-0.3335	-0.242079	-0.430735	-0.25897	-0.0439211	-0.871593	-0.22332	-0.0437543	-0.181009	-0.513829	-0.3805	-0.366603	-0.222311	-0.690712	-0.270979	-0.842864	-0.508697	-0.573747	-0.149556	-0.204692	-0.83416	-0.544046	-0.455563	0.0371952	-0.420878	-0.45429	-0.42519	-1.05358	0.560517	0.374642	-0.070381
O75884	RBBP9	-0.071341	-0.0714452	-0.0705412	-0.0720964	-0.0721662	-0.0722391	-0.0722065	-0.0726154	-0.0718019	-0.0710434	-0.072789	-0.0713537	-0.0705533	-0.0704325	-0.0710548	-0.643191	-0.5968	-0.611822	-0.71902	-0.0705648	-0.0705155	-0.0709777	-0.0720632	-0.072483	-0.0735226	-0.0722858	-0.0666033	-0.0683238	-0.0740938	-0.0712652	-0.0701293	-0.0708997	-0.0700396	-0.0667255	-0.0654228	-0.0757322	-0.0653662	-0.0710484	-0.072427	-0.0696482	-0.0732392	-0.0716616	-0.0720372	-0.0713852	-0.0714106	-0.0723681	-0.0719338	-0.070381
O75891	ALDH1L1	0.265378	1.05545	0.202451	-0.2919	-0.509013	0.386983	0.283564	-0.737802	0.209686	-0.193426	0.0356573	0.147649	0.124728	0.0324116	-0.0339803	0.495122	0.376398	-0.0663963	-0.324511	0.0100957	0.187092	0.893738	-0.0436521	0.582625	0.0565109	-0.809021	0.621012	0.487197	-0.670799	-0.553317	0.202143	0.242516	0.26155	-0.100436	0.0686709	0.200844	-0.352869	-0.164203	-0.503876	-0.382226	-0.134491	-0.927066	-0.0852992	-1.22167	-0.172336	-0.294788	-0.250786	0.317349
O75915	ARL6IP5	-0.0307075	0.138449	-0.379954	-0.0720964	0.122356	-0.150543	0.025987	-0.309219	-0.342693	0.285041	-0.417558	-0.162093	-0.220947	-0.106019	0.0603268	-0.227443	0.121625	-0.242224	-0.80661	-0.0266895	0.0690437	0.396686	-0.147664	-0.288891	-0.236904	-0.265279	-0.141913	-0.3224	-0.478251	-0.0214202	-0.0712177	-0.794935	-0.126863	-0.0734191	-0.170867	0.477533	-0.334313	-0.10224	-0.49011	-0.0298859	-0.532874	-0.147199	-0.0761742	-0.12339	0.631775	-0.463574	-0.381655	-0.34947
O75923	DYSF	-0.071341	-0.0714452	-0.0705412	-0.0720964	-0.642183	-0.686614	-0.618451	-0.319661	0.281695	0.165456	0.00638113	-0.0399884	0.0494021	0.106241	-0.0715465	0.29527	0.0939598	0.155781	-0.0136698	0.284275	0.196679	0.379453	0.0578342	-0.0303947	0.0719379	0.0875086	0.0347918	-0.112634	0.119866	0.140599	0.0893797	0.405072	0.220286	-0.0108842	0.01252	0.162835	0.10748	-0.123864	0.173229	-0.394503	0.0423574	-0.18078	-0.1678	0.490395	-0.0319855	0.141395	0.262652	-0.070381
O75935	DCTN3	0.00466192	0.205331	-0.478026	-0.0407842	0.0230571	-0.103408	0.1694	-0.663682	-0.00187563	-0.146939	0.115624	0.0148117	0.0161505	-0.00442075	0.0582353	0.252924	0.0614907	0.053001	0.202985	-0.100576	-0.0513145	0.0386615	0.0356305	0.248365	-0.0296699	0.235399	0.38596	0.436388	0.318574	0.0945678	0.0514302	0.0929317	0.0977635	-0.0246854	0.210922	0.108256	0.179921	-0.00963017	-0.0578632	0.0721414	0.48823	-0.0449136	0.0863308	0.0236209	0.357746	0.192796	0.223939	-0.812123
O75937	DNAJC8	-0.117276	-0.186175	-0.375788	0.00400801	-0.404145	-0.173013	-0.060801	-0.64563	0.189826	-0.169229	0.156683	-0.633052	-0.0398918	0.0395549	-0.117459	-0.0684939	-0.114813	-0.164856	-0.661683	-0.22504	0.00705291	-0.210126	0.185562	-0.129607	-0.290701	-0.290068	0.222317	0.332401	0.21344	-0.288983	0.133859	-0.113689	-0.0357144	-0.271063	-0.0682438	-0.173251	-0.128622	0.0162306	-0.0423921	0.0469899	-0.388313	-0.455639	-0.395213	-0.197176	-0.0924417	-0.293246	-0.279027	-0.525537
O75940	SMNDC1	0.0579437	-0.244872	-0.205047	-0.354372	-0.564636	-0.405945	-0.68454	-0.803837	-0.0716144	-0.0402672	0.0027937	-0.287818	0.299548	0.354998	0.274167	-0.385853	-0.32976	-0.488173	-0.556144	-0.33582	-0.479496	-0.36417	0.160984	-0.0355194	-0.430604	-0.335795	-0.0155501	0.141636	0.035859	-0.143329	0.032869	-0.398834	0.0570359	-0.0607747	0.0502919	0.0587952	0.0428038	-0.08333	-0.137921	-0.210568	-0.283343	-0.281763	0.141037	-0.443143	-0.579013	-0.747442	-0.420042	-0.249354
O75947	ATP5PD	-0.110643	-0.19857	-0.63134	-0.339313	-0.238301	0.16279	-0.238131	-0.354268	-0.059885	-0.402853	-0.070072	-0.407781	0.295979	-0.122452	-0.179057	0.00313455	-0.460471	-0.40751	-0.342998	-0.139891	-0.267282	-0.59409	-0.262463	-0.134746	0.257435	-0.380604	-0.0411739	-0.131569	-0.280341	-0.375445	0.0468749	-0.542528	-0.203859	-0.118213	0.0686709	-0.412474	-0.511954	-0.071256	-0.219021	-0.127613	-0.665374	0.0802979	-0.0547144	-0.236809	-0.141667	-0.776913	-0.469345	0.0634885
O75955	FLOT1	-0.17216	-0.0218042	0.26523	0.00143144	-0.0607217	-0.099562	-0.158951	-0.132007	0.00862556	-0.149576	0.0624832	-0.325856	-0.0163894	0.133977	0.144012	0.0763128	0.197466	-0.339123	-0.0956467	-0.0745889	-0.0288191	-0.417636	0.115072	-0.250308	0.513135	-0.363403	0.0821778	0.0196412	-0.232982	-0.131551	0.26621	0.131674	0.042156	-0.183085	0.0568281	-0.470828	0.00509994	0.0261619	-0.3214	0.217614	-0.0567363	0.0174179	-0.118469	-0.0479622	-0.194363	-0.0112006	-0.176304	0.126957
O75962	TRIO	0.243082	0.100178	0.226882	0.204431	0.116575	0.235084	0.22809	-0.0938507	0.250769	-0.164695	0.174996	-0.0790869	0.728698	0.405508	0.295358	0.248776	0.565772	0.610159	0.288587	0.307	0.270847	0.136169	0.339953	0.145916	0.082083	0.334808	0.329069	0.279704	0.315836	0.175444	0.159648	0.181864	0.237389	0.359516	0.449244	0.418989	0.382859	0.549874	0.534199	0.346379	0.189385	0.217531	0.103618	0.0525024	0.122259	0.0269959	0.0696673	0.202766
O75964	ATP5MG	-0.0400145	-0.109833	-0.526915	-0.0722938	-0.0651049	0.260129	-0.021082	-0.11267	0.104638	0.0942077	0.0694834	0.140768	0.400017	-0.00442075	-0.0199763	-0.131912	-0.364349	-0.350623	-0.216943	0.086505	-0.107054	-0.0457558	-0.248695	-0.0832825	0.138114	-0.203249	0.327563	0.00510897	0.186926	-0.128232	0.00209007	-0.205161	-0.181818	-0.0213802	0.15423	-0.159571	-0.0394578	0.1318	0.161866	-0.0213145	-0.46544	0.0515956	0.118303	-0.0131449	-0.198212	-0.451141	0.0045882	0.443827
O76003	GLRX3	0.305884	0.0741561	0.309882	0.24858	0.358521	0.526765	0.553885	-0.029016	0.283856	0.0822333	0.0961086	-0.0721526	0.116076	-0.242647	-0.170522	-0.0186265	0.0455373	0.141871	0.0811867	-0.105459	0.0936388	-0.268528	0.194184	0.215213	0.0112057	0.36621	0.0762655	0.0992229	0.230891	0.260955	-0.209334	0.219403	0.131221	-0.00696111	0.199627	-0.10813	0.166912	-0.0579324	-0.561845	-0.271345	0.0834664	-0.112116	-0.347064	-0.281398	-0.293202	0.0981722	-0.044401	0.142652
O76014	KRT37	-0.118069	0.0857904	-0.0365493	0.210553	0.285686	-0.101247	0.13721	0.756437	-0.226806	0.0562135	-0.0721474	0.499441	-0.160722	-0.122436	-0.290121	-0.105662	-0.0690093	0.0705367	0.448334	0.181455	0.121491	0.494694	-0.329594	-0.340627	-0.0949881	-0.0456396	-0.28715	-0.210212	-0.176377	-0.0246722	-0.322113	-0.207807	-0.332633	-0.13883	-0.234559	-0.15797	0.0531554	-0.0426752	0.301841	-0.0541979	0.0762693	0.0281778	-0.378871	0.884811	-0.200615	-0.0257863	-0.130402	0.356118
O76021	RSL1D1	0.503687	0.289176	0.474315	0.91369	0.244672	0.164024	0.0805377	0.179959	0.563851	0.471158	0.181323	0.240586	0.254503	-0.0128396	0.240188	0.286916	0.213427	1.00067	0.585048	0.261606	0.186015	-0.234576	0.307664	0.379738	-0.067697	0.219218	0.49059	0.281172	0.289812	0.50051	0.174993	0.40832	0.353751	0.337706	0.702705	-0.0133911	0.410396	0.404561	0.470732	0.458501	0.826749	0.514237	0.65504	0.791812	0.0630566	0.134066	0.291636	0.744103
O76024	WFS1	-0.071341	-0.0714452	-0.0705412	-0.0720964	-0.804923	-0.454724	-0.395713	-1.09922	-0.0718019	-0.0710434	-0.072789	-0.0713537	-0.0705533	-0.0704325	-0.0710548	-0.0713588	-0.0713768	-0.0722234	-0.0711924	-0.0705648	-0.0705155	-0.0709777	-0.0720632	-0.072483	-0.0735226	-0.0722858	-0.0666033	-0.0683238	-0.0740938	-0.0712652	-0.0701293	-0.0708997	-0.0700396	-0.0667255	-0.0654228	-0.0757322	-0.0653662	-0.0710484	-0.072427	-0.0696482	-0.0732392	-0.0716616	-0.0720372	-0.0713852	-0.0714106	-0.0723681	-0.0719338	-0.070381
O76031	CLPX	0.0824326	0.0149613	-0.115644	-0.108621	-0.18162	-0.262772	-0.207737	-0.166492	-0.237966	-0.355568	-0.110407	-0.2684	-0.27659	-0.258574	-0.474102	0.0505126	-0.0892875	-0.0390701	-0.120606	-0.354551	-0.200604	-0.41797	-0.0508	0.0278391	0.179043	-0.418041	-0.191775	-0.142027	-0.0925243	-0.229292	-0.256091	-0.146096	-0.375678	-0.198154	-0.12499	-0.204974	-0.154217	-0.236221	-0.265645	-0.00853019	0.0628093	-0.191581	-0.103894	-0.0460174	0.0133516	-0.0118771	0.07058	-0.137441
O76054	SEC14L2	-1.40635	-1.64131	-0.512729	-1.42236	-0.982606	-0.831901	-0.631502	-0.452034	-0.0718019	-0.0710434	-0.072789	-0.0713537	-0.278238	-0.00106535	-0.100419	-0.863691	-0.938124	-0.872942	-0.841619	-0.47834	-1.14025	-1.45348	-0.582634	-0.324134	-0.432117	-0.662199	-2.18824	-2.04192	-2.05195	-1.29973	-1.28391	-1.31475	-1.50494	-1.18105	-1.48775	0.612528	-1.10918	-0.0710484	-0.072427	-0.268408	-0.299506	-0.68752	-1.2012	-0.922886	-0.759005	-1.00421	-0.950314	-1.51573
O76071	CIAO1	-0.357934	-0.219089	-0.298342	-0.330967	-0.357468	-0.262898	-0.319392	-0.274359	-0.570622	-0.261782	-0.754718	-0.371304	-0.0151898	-0.19057	-0.035298	-0.623164	-0.653084	-0.506475	-0.498285	-0.640978	-0.659616	-0.799307	-0.995618	-0.476425	0.144755	-0.726977	0.0462372	-0.0410351	-0.100965	-0.455696	-0.530879	-0.447643	-0.617381	-0.202044	-0.117337	-0.355322	-0.260433	0.000915061	-0.186426	-0.340102	-0.282188	-0.321427	-0.288389	-0.673477	-0.82662	-0.226318	-0.414811	-0.34275
O76090	BEST1	0.0267165	0.5205	-0.0319205	-0.0190425	-0.663255	-0.723419	-0.675296	-0.0652999	-0.469126	-0.318487	-0.458109	-0.776655	-0.56201	-0.73232	-0.669919	-0.549092	-0.487223	-0.28251	-0.505408	-1.46916	-1.6691	-0.908299	-0.57527	-0.355656	-0.160782	-0.703839	-0.253852	-0.162271	-0.0194406	-0.34177	-0.292485	-0.477572	-0.443837	-1.28839	-1.60115	-1.85401	-1.27539	-0.754388	-0.38524	-0.834936	-1.0302	-0.845096	-0.319447	-0.453859	0.0297967	-0.62059	-0.862835	-0.480366
O76094	SRP72	-0.0219098	-0.000862381	-8.3871e-05	-0.199327	-0.157892	0.179924	0.0775907	-0.481215	-0.0247146	-0.302081	-0.0854441	-0.591015	0.00726858	-0.294572	-0.266184	-0.0479984	-0.145683	-0.175867	-0.80661	-0.107526	-0.326161	-0.64869	-0.0902077	-0.72052	-0.390053	-0.0854018	0.18999	-0.0508873	0.0146808	0.0614838	-0.0727602	-0.392214	-0.0188284	0.0402068	-0.0670685	-0.246972	0.289843	-0.126644	-0.262392	-0.00476239	-0.18721	-0.123384	-0.238255	0.247409	0.0443141	-0.380106	-0.273657	0.168712
O94760	DDAH1	-1.37974	-1.27711	-1.26392	-1.5279	-1.49175	-1.54697	-1.60565	-1.3135	-1.45375	-1.38006	-1.41713	-1.24292	-1.45539	-1.37467	-1.3415	-1.24411	-1.36637	-1.48466	-1.60789	-1.38196	-1.46111	-1.4936	-1.85333	-1.56585	-1.66085	-1.56064	-1.962	-1.80853	-1.8729	-1.52734	-1.24484	-1.47794	-1.59165	-1.29672	-1.05984	0.713095	-1.46872	-1.40867	-1.40118	-2.20048	-2.21686	-1.80368	-1.8964	-2.37724	-1.79292	-1.64112	-1.0243	-1.35842
O94766	B3GAT3	-0.245653	-0.189144	-0.0828406	-0.0672809	-0.479444	-0.482577	-0.402869	-0.366343	-0.533144	-0.0789383	-0.29841	-0.0658285	0.00450329	-0.12757	-0.222691	-0.127945	-0.229949	-0.0768136	0.217086	0.14677	-0.388019	0.171188	-0.423637	-0.428308	0.10965	-0.245914	-0.372704	-0.262597	-0.155905	-0.246072	-0.352955	-0.342906	-0.330688	-0.0861205	-0.0349874	-0.646018	-0.242271	-0.441442	-0.318454	-0.545807	0.315292	-0.114265	0.0433062	-0.246259	-0.0173806	-0.104863	0.0426026	0.176312
O94776	MTA2	-0.071341	-0.0714452	-0.0705412	-0.0720964	-0.0721662	-0.0722391	-0.0722065	-0.0726154	0.224826	0.159731	0.128171	-0.206381	0.112311	0.156591	0.106656	0.123261	-0.0568468	-0.0111145	0.157492	0.212241	0.402058	0.11872	0.141582	0.371263	0.109445	0.229145	0.0669677	0.157463	0.0568204	0.0941676	0.00755675	0.208707	-0.0569336	0.0305861	0.0801024	0.124821	0.260732	0.106087	0.422757	-0.0244096	0.314523	-0.145171	-0.129404	0.0642922	-0.0333234	-0.0600134	0.0280228	-0.070381
O94788	ALDH1A2	-1.30218	-1.72355	-1.73516	-1.29635	0.233691	-1.84149	0.231757	-1.48409	-2.27657	-1.61859	-2.1618	-1.07954	-1.08976	-1.59518	-0.269067	-2.15722	-2.42993	-2.1036	-1.99614	-1.44871	-1.18058	-0.521791	-0.166367	-0.272651	-1.13727	-1.75806	-1.75324	-1.56366	-1.7772	-2.17111	-1.75911	-2.30458	-2.30523	-2.51892	-2.20463	-2.60631	-2.21915	-2.20496	-1.81402	-0.480228	-1.14517	-1.02454	0.122539	-1.44028	-1.84894	-1.11837	-1.35153	-1.44828
O94804	STK10	-0.131493	0.262793	0.446211	-0.393559	-1.28874	-1.01934	-1.18881	-1.36286	-0.218204	-0.524376	-0.385622	-0.514944	-0.624186	-0.517693	-0.666997	-0.201002	0.396844	-0.0266895	-0.0796791	-0.528279	-0.597097	-0.56694	-0.0824098	-0.48327	-0.261852	-0.449749	0.19274	-0.207294	0.225993	-0.318833	-0.381239	-0.626933	-0.112715	-0.292039	-0.151155	-1.26215	-0.593649	-0.124073	-0.0468556	-0.177535	-0.786317	-0.662716	-0.218478	-0.597886	-0.010333	-0.171897	-0.458271	-0.301063
O94811	TPPP	-0.715614	-0.806071	-0.82712	-0.737967	-0.817198	-0.793787	-0.637269	-0.606625	-0.788275	-0.939556	-0.888543	-0.764247	-0.925834	-0.66155	-0.858157	-0.846381	-0.686106	-0.826259	-0.719551	-1.36278	-1.64302	-1.98654	-1.03135	-0.320662	-0.635862	-0.499471	-1.31518	-1.37108	-0.983658	-0.268902	-0.948996	-1.12222	-1.14309	-0.939888	-1.32199	0.687103	-1.15586	-0.814089	-0.751939	-1.06488	-0.547691	-0.607628	-0.618792	-0.696577	-0.510586	-0.321952	-0.484051	-0.743236
O94822	LTN1	-0.0236895	0.314588	0.0456479	0.126365	-0.266964	-0.260271	-0.14292	-0.41706	-0.362563	-0.237215	-0.253705	-0.135636	-0.313804	-0.178684	-0.506846	0.0319961	-0.0763854	0.0574579	0.0535266	-0.16119	-0.489643	-0.0719519	-0.328692	-0.177106	-0.0707352	-0.344383	-0.120546	-0.0488698	-0.215577	-0.367049	-0.556241	-0.457237	-0.778807	-0.0862203	-0.0315476	0.00318921	0.046675	-0.0585704	0.0156711	0.0172107	0.235375	-0.151555	-0.135013	-0.0330946	0.0718383	0.0634691	0.17569	0.0518807
O94826	TOMM70	0.441622	0.021296	0.0310863	-0.163828	0.642537	0.172467	0.0662859	-0.403881	0.0781193	-0.167288	0.57883	-0.394893	0.401267	0.495618	0.274167	0.34538	0.146183	0.12167	-0.141969	0.246608	0.48782	-0.227695	0.524454	0.873783	-0.179066	-0.145742	0.165139	0.651624	-0.343665	0.0280282	0.195677	0.197848	0.224301	0.0330414	0.221609	-0.0133911	0.427091	0.154655	-0.0189994	0.424092	-0.243305	-0.226601	0.242799	-0.281398	0.262092	-0.39548	-0.255998	0.157532
O94829	IPO13	-0.428449	-0.36057	-0.367461	-0.319701	-1.26386	-1.14351	-1.72648	-0.923114	-0.429437	-0.218896	-0.286872	0.189641	-0.506437	-0.614338	-0.642778	-0.472012	-0.611183	-0.34754	-0.317246	-0.502937	-0.570909	-0.678967	-0.909741	-0.179873	-0.0454761	-0.215581	-0.826687	-0.708231	-0.277299	0.113529	-0.389022	-0.0475653	-0.218467	-0.706855	-0.557126	0.00681084	-0.348495	-0.238696	0.0272652	-0.946716	-0.108654	-0.541277	-0.777236	-0.601408	-0.15294	0.343161	0.0898173	-0.225333
O94832	MYO1D	0.591831	0.525392	0.162022	0.197397	0.525036	0.0355264	-0.0132786	0.0807322	-0.10169	0.0892443	0.35105	0.722698	-0.0237442	0.626258	0.301586	0.0215578	0.108003	-0.241048	0.721477	-0.0316396	-0.00427994	0.457357	0.665379	0.53386	-0.174375	-0.405565	0.233684	0.0401832	-0.0966918	1.06357	0.0949675	0.462896	0.264273	0.118247	-0.0188538	-0.504444	0.459868	0.0657313	0.281857	0.616284	0.327661	0.422464	-0.0736571	0.625139	0.359685	0.0612275	-0.113262	0.357987
O94874	UFL1	0.0296794	0.0758113	-0.0954549	0.0860355	-0.236018	-0.099562	-0.292254	-0.0224794	-0.110777	0.190676	-0.189004	0.0995724	-0.0865846	0.02978	-0.0165628	-0.0459408	-0.157236	-0.264003	0.19095	-0.107526	-0.188385	-0.145378	-0.0162716	-0.0773182	0.334977	-0.294002	0.0019144	-0.27902	0.053362	-0.145923	-0.0681067	-0.313557	-0.0288902	0.311067	-0.429096	0.0522601	0.0943411	-0.116897	0.0390187	0.114188	0.0399228	0.0981714	-0.152675	0.170407	0.0499085	0.0412634	0.146219	-0.00205787
O94888	UBXN7	-0.071341	-0.0714452	-0.0705412	-0.0720964	-0.0721662	-0.0722391	-0.0722065	-0.0726154	-0.0718019	-0.0710434	-0.072789	-0.0713537	-0.0705533	-0.0704325	-0.0710548	-0.0713588	-0.0713768	-0.0722234	-0.0711924	-0.0705648	-0.0705155	-0.0709777	-0.0720632	-0.072483	-0.0735226	-0.0722858	-0.975068	-0.646284	-0.901969	-0.0712652	-0.0701293	-0.0708997	-0.0700396	-0.0667255	-0.0654228	-0.0757322	-0.0653662	-0.0710484	-0.072427	-0.0696482	-0.0732392	-0.0716616	-0.0720372	-0.0713852	-0.0714106	-0.0723681	-0.0719338	-0.070381
O94901	SUN1	0.128503	0.434735	-0.00362521	0.360852	0.0749091	0.0459551	0.394781	-0.0251292	0.319108	0.138388	-0.109075	-0.00401312	0.0770667	0.850801	0.444655	0.036069	0.108003	-0.143367	0.049439	-0.242724	-0.0306957	0.470901	-0.124397	0.164077	-0.0180651	-0.132953	0.469053	-0.101313	-0.137599	0.38663	0.0929317	-0.0191926	-0.0299743	-0.55746	-0.245276	-0.824558	-0.401286	0.046805	0.161866	-0.0138897	0.107668	-0.0399381	-0.376631	0.227067	-0.131179	0.164333	0.365954	-0.0987704
O94903	PLPBP	-0.02201	-0.120467	0.26769	-0.230506	-0.200003	0.185828	0.271881	-1.05653	0.237908	-0.273093	-0.23042	-0.109075	0.0175616	-0.0453325	-0.0109744	0.466313	0.263959	0.248495	0.709965	0.216623	-0.114587	-0.148466	-0.542271	-0.263022	-0.347905	-0.0768818	0.155119	-0.0822212	-0.050554	-0.217902	0.132679	0.00367793	0.00420438	0.189507	-0.446367	0.167717	-0.291536	0.172193	-0.390571	0.128892	-0.566965	-0.0514042	0.0187455	0.211798	-0.439936	-0.0885395	-0.311167	-0.608572
O94905	ERLIN2	-0.396087	-0.161321	-0.918997	-0.167479	-0.401106	-0.603995	-0.752388	-0.21543	-0.703969	-0.666865	-0.407348	0.0342301	-0.445034	-0.170763	-0.0745637	-0.632216	-0.755838	-1.10233	0.175423	-0.545543	-0.274314	0.00805404	-0.219322	-0.296058	-0.590864	-0.213622	-0.410658	-0.33428	-0.951836	0.0266949	-0.570889	-0.110081	-0.376203	-0.181891	-0.674088	0.302015	-0.546998	-0.532257	-0.642347	-0.329249	-0.417711	-0.113718	-0.658566	-0.015972	-0.1205	0.287463	-0.327857	-0.495324
O94906	PRPF6	-0.177081	-0.0779855	-0.0222214	-0.312195	-0.181488	-0.165884	-0.0755631	-0.327754	-0.286752	-0.301294	-0.312833	-0.530768	-0.207436	-0.0718693	-0.215507	0.114703	0.136161	0.0369099	-0.106741	-0.54789	-0.279673	-0.234576	-0.235134	0.00818581	-0.0813798	-0.0324771	0.0275009	0.0270401	0.123929	0.0147064	-0.0701293	-0.179257	-0.160099	-0.136399	0.0310038	0.0641619	-0.0360951	-0.352617	-0.376148	0.18958	0.172389	-0.106618	-0.243382	-0.203051	0.0914493	0.0952932	-0.129762	-0.137322
O94911	ABCA8	-0.308648	0.13088	-1.42107	-1.1619	-0.711626	-0.714071	-0.869663	-0.594219	-0.610659	-0.540417	-0.673713	-0.213959	-0.650792	-0.355186	-0.146819	-0.397121	-0.837864	-0.945274	0.238373	-0.580119	-0.70788	-0.382446	-0.661023	-0.340135	0.571711	-0.436739	-0.572561	-0.636337	-0.805532	-0.525545	-0.382832	-0.527629	-0.604859	-1.70355	-1.35143	-1.24364	-1.06091	-0.896774	-0.279627	-0.192302	-0.285225	-0.0885655	-0.544518	0.0508441	-0.381643	-0.442663	-0.345276	-1.09165
O94915	FRYL	0.109953	0.311267	0.589358	-0.117497	0.0016758	-0.0406552	0.298963	0.133269	-0.0317284	0.102892	-0.130015	-0.451655	-0.212992	-0.355186	-0.186886	-0.120976	-0.00772186	-0.0986083	0.0964827	0.15855	-0.263192	-0.0867941	-0.28139	-0.533619	-0.174375	-0.127463	-0.0922552	-0.162205	0.0757389	-0.0437074	0.649554	-0.119766	0.042156	-0.0227785	-0.14279	-0.279274	-0.135963	-0.0666269	-0.0208723	0.0607688	0.641641	0.0483252	0.344119	-0.0525295	-0.129128	0.00747483	-0.0113005	-0.209476
O94919	ENDOD1	-0.638224	-0.0376392	-0.539639	-0.0683216	-0.326273	-0.447595	-0.161333	0.144047	-0.29841	0.0607035	-0.122874	0.698512	-0.452753	-0.104773	-0.25106	-0.256591	0.0614907	-0.356026	0.0964827	-0.0839942	-0.0327703	0.529963	0.0718701	-0.645635	-0.136537	-0.428491	-0.162976	-0.123913	-0.223352	0.117634	-0.126531	-0.0466348	-0.287024	-0.194017	-0.385316	0.28994	-0.269017	-0.0813849	0.383541	-0.509777	0.121411	0.118484	-0.271053	0.127684	0.193949	0.339275	0.250021	-0.280272
O94925	GLS	-0.216307	-0.170274	-0.146618	-0.334541	-0.200776	0.054356	-0.297224	-0.478873	0.024281	0.0954739	-0.0137329	-0.757811	0.393378	0.158649	-0.0438077	0.163325	-0.212253	-0.214145	-0.387033	-0.381293	-0.690941	-0.719875	-0.622251	-0.655992	-0.452809	-0.713565	0.62541	-0.02417	0.0876509	-0.211233	-0.308053	-0.179257	0.249208	-0.0849521	0.357936	0.186778	-0.0667479	0.189507	-0.344452	0.0785418	-0.478671	-0.0591338	0.490397	-0.17608	-0.631863	-0.267351	-0.58237	-0.159565
O94927	HAUS5	-0.071341	-0.0714452	-0.0705412	-0.0720964	-0.0721662	-0.0722391	-0.0722065	-0.0726154	-0.279227	-0.0549547	-0.237	-0.28959	-0.0705533	-0.0704325	-0.0710548	-0.0713588	-0.0713768	-0.0722234	-0.0711924	-0.0705648	-0.0705155	-0.0709777	-0.0720632	-0.072483	-0.0735226	-0.0722858	-0.0666033	-0.0683238	-0.0740938	-0.0712652	-0.0701293	-0.0708997	-0.0700396	-0.0667255	-0.0654228	-0.0757322	-0.0653662	-0.0710484	-0.072427	-0.0696482	-0.0732392	-0.0716616	-0.0720372	-0.0713852	-0.0714106	-0.0723681	-0.0719338	-0.070381
O94973	AP2A2	-0.0862533	-0.00647633	-0.0677566	-0.13481	-0.379784	-0.452245	-0.383898	-0.0474034	-0.36695	-0.391752	-0.296891	-0.222258	-0.371145	-0.452412	-0.341649	-0.329414	-0.394749	-0.16719	-0.248114	-0.251836	-0.281561	-0.0977807	-0.312501	-0.678472	-0.332098	-0.614463	-0.643017	-0.342474	-0.000265136	-0.4207	-0.331769	-0.442749	-0.507372	-0.385221	-0.414955	-0.0860192	-0.376008	-0.506136	-0.268244	-0.51135	-0.119253	-0.430431	-0.428669	-0.318397	-0.155011	-0.115866	-0.0549023	-0.0835685
O94979	SEC31A	-0.205167	-0.173417	-0.135967	-0.0810281	-0.0356927	0.0645716	0.0509718	-0.301181	-0.240927	-0.139933	-0.191897	-0.224143	-0.428638	-0.0507037	-0.0479901	-0.180555	-0.117757	-0.0351339	-0.338805	0.135001	-0.237474	-0.211879	-0.898439	-0.969899	-1.0435	-0.603869	-0.843535	-0.77907	-0.55249	0.011196	-0.00517528	-0.0550166	-0.0161428	-0.00574199	-0.0193295	-0.0449073	-0.408957	-0.159239	-0.292133	-0.406155	-0.459191	-0.463998	-0.342891	-0.486838	-0.340475	-0.0652206	-0.158362	-0.167593
O95071	UBR5	-0.071341	-0.0714452	-0.0705412	-0.0720964	0.230264	-5.90782e-18	0.342814	0.293248	-0.451156	-0.142783	-0.527232	0.429963	-0.135252	-0.220076	-0.128566	-0.362164	-0.130902	-0.335326	-0.206588	-0.190942	-0.174142	-0.151171	-0.491116	-0.121356	0.16116	-0.28292	-0.335361	-0.420288	-0.231493	-0.46866	-0.481933	-0.187756	-0.543765	-0.272682	-0.198728	-0.00586151	0.074832	-0.709003	-0.117474	-0.321503	0.641641	0.104163	-0.408034	-0.357034	-0.0410025	-0.365032	0.135983	-0.070381
O95139	NDUFB6	-0.0996562	-0.0439233	-0.0848208	-0.00467178	-0.0164083	0.0688255	-0.143533	0.170785	-0.229909	0.0540584	-0.303009	0.169121	0.559315	-0.034164	-0.0548967	-0.303694	0.0768853	-0.0768136	-0.318857	-0.0537409	0.110001	-0.0791318	0.0558769	-0.00511833	0.0383856	0.0516653	-0.0390873	-0.27902	-0.517942	0.322692	0.281257	-0.145489	0.186623	0.189507	0.354337	0.133707	0.185078	0.192137	-0.107301	-0.0635986	0.0233323	-0.111662	0.0489333	-0.186137	0.0160321	-0.300614	-0.300098	-0.278692
O95155	UBE4B	-0.071341	-0.0714452	-0.0705412	-0.0720964	-0.244633	-0.185661	-0.154499	-0.272321	0.16935	0.0925586	0.473488	-0.0761307	-0.316854	-0.246012	-0.361074	0.194318	-0.117757	-0.0862014	-0.100383	0.11766	0.191804	-0.120976	-0.126862	-0.0264149	0.861473	-0.0522652	0.0110228	0.122193	-0.122596	0.407177	-0.0275667	0.701222	-0.0357144	-0.336359	-0.02741	-0.0663632	-0.142754	0.301945	-0.0868985	-0.219496	0.382289	-0.059958	-0.0194458	-0.105769	0.293483	0.476347	0.122	-0.070381
O95163	ELP1	-0.000611779	0.115767	-0.0186213	-0.0109219	0.0384561	0.00792039	0.0490121	-0.22404	-0.0914596	-0.00861856	-0.0320625	-0.222724	-0.0398918	-0.132921	-0.079011	-0.172203	-0.123306	-0.137118	-0.27818	-0.0676262	-0.137179	-0.15634	-0.0866163	0.137884	-0.00652825	0.112616	0.123987	-0.0249805	-0.143816	-0.0904344	-0.0156877	0.00108173	-0.0364187	-0.0765639	-0.131589	-0.146988	-0.15314	-0.0690965	-0.233815	-0.0838556	-0.031532	-0.12895	-0.027778	0.0236209	-0.00262316	-0.137418	-0.149964	0.0313046
O95168	NDUFB4	-0.00359409	-0.127824	-0.793243	0.0409699	-0.395092	-0.400052	0.0960626	-0.154997	0.109846	-0.282501	-0.370429	-0.0545549	0.533994	0.197684	-0.390468	-0.0891949	0.111788	0.0988531	0.156831	0.23398	-0.493359	-0.0199515	-0.377336	-0.248041	0.566825	0.000473084	0.274195	-0.566406	-0.281628	-0.0609703	-0.00849488	-0.34619	-0.179082	0.1089	0.335812	-0.589654	-0.329559	0.232782	0.0824277	0.0902867	-0.539952	-0.470469	-0.302773	-0.242046	0.286851	-0.241548	0.162963	0.502526
O95182	NDUFA7	0.174623	0.306216	-0.0607488	0.119989	0.0133123	0.0167878	0.203541	-0.151313	0.129691	0.0775274	0.0474458	-0.197238	0.162632	0.345281	0.145112	-0.129458	0.229761	0.0892631	-0.615418	0.0614279	-0.0189037	-0.0175112	0.0122226	-0.0336542	0.0551511	-0.0419443	0.513221	-0.175305	-0.109137	0.252432	0.180083	-0.00593659	0.131953	-0.00347892	0.00911754	-0.145662	-0.126966	0.0951436	0.0312596	0.0409908	0.0164704	0.158543	-0.0133836	-0.0224416	0.117087	-0.194028	0.0574021	0.0534127
O95197	RTN3	-1.32829	-0.628849	-1.2439	-0.556377	-0.730053	-0.703731	-0.558986	-0.541694	-0.510373	-0.49229	-0.251063	0.0481346	-0.788439	-0.813015	-0.833138	-0.703496	-0.598842	-0.615513	-0.501199	-0.72652	-0.776036	-0.592641	-0.462203	-0.946755	-0.852842	-0.720029	-0.754921	-0.652203	-0.590873	-0.450285	-0.684811	-0.635974	-0.681841	-0.453173	-0.626981	0.409728	-0.518487	-0.706855	-0.52927	-1.55543	-0.855034	-0.675521	-0.618792	-0.731294	-0.302425	-0.303404	-0.197499	-0.465224
O95202	LETM1	-0.305752	-0.227524	0.0618737	0.238876	-0.177789	-0.0785796	-0.0302974	-0.0774336	-0.0761307	0.276585	-0.104415	-0.173569	0.216762	-0.229229	-0.0286753	0.0526293	-0.248867	0.199909	0.180464	-0.013697	0.1631	-0.0486676	-0.239597	-0.0760783	0.454543	0.165501	-0.083747	-0.317047	-0.0272407	0.239507	-0.106564	-0.120546	-0.356729	0.188197	0.0233369	-0.170867	0.140997	-0.159239	0.0323597	0.073878	0.691583	0.208433	-0.312415	0.182674	-0.148937	-0.262276	-0.0637965	0.182842
O95219	SNX4	0.467635	0.233289	0.277512	0.0303518	0.492654	0.530787	0.472604	-0.465854	0.306136	0.553593	0.361669	-0.183147	0.279949	0.181193	0.277267	0.249835	0.481366	0.172951	-0.395344	0.0314689	0.245468	-0.395931	0.571789	0.450138	0.622575	-0.0838869	0.669501	0.700627	-0.115915	0.0192467	0.476812	0.34023	0.425056	0.450325	0.254897	-0.12675	0.315626	0.415686	-0.205839	0.363232	0.0200692	0.305212	0.182911	0.300263	0.422953	-0.0950561	0.0663862	0.0828482
O95232	LUC7L3	-0.0164212	-0.234705	-0.385084	0.0117591	0.118981	-0.183394	-0.0918354	-0.433835	-0.0228135	-0.281729	0.0707318	-0.431363	-0.18031	-0.12112	-0.184834	-0.162356	0.00475108	-0.403882	0.117235	-0.0515936	0.119892	-0.252539	-0.00586615	0.10322	-0.38405	0.112313	0.288424	0.447945	0.165259	-0.184561	-0.0289536	-0.350454	-0.00485038	-0.0361232	0.143215	-0.112798	0.0870826	0.132262	-0.0273634	0.564599	-0.280314	0.0875663	-0.0861009	-0.0172635	-0.221457	-0.272869	0.00289424	-0.117221
O95248	SBF1	-0.071341	-0.0714452	-0.0705412	-0.0720964	-0.0721662	-0.0722391	-0.0722065	-0.0726154	-0.0718019	-0.0710434	-0.072789	-0.0713537	-0.0705533	-0.0704325	-0.0710548	-0.0713588	-0.0713768	-0.0722234	-0.0711924	-0.0705648	-0.0705155	-0.0709777	-0.460702	-0.480514	-0.0550295	-0.350496	-0.0666033	-0.0683238	-0.0740938	-0.0712652	-0.0701293	-0.0708997	-0.0700396	-0.0667255	-0.0654228	-0.0757322	-0.0653662	-0.0710484	-0.072427	-0.0696482	-0.0732392	-0.0716616	-0.0720372	-0.0713852	-0.0714106	-0.0723681	-0.0719338	-0.070381
O95278	EPM2A	0.315712	0.11063	0.260785	0.0117591	-0.117095	-0.0477153	-0.182824	-0.337807	-0.0731883	-0.0950119	-0.0413103	-0.164776	-0.0453472	-0.0834521	-0.308289	0.194318	0.339944	0.177373	0.257475	-0.0752836	-0.0943968	-0.0201806	-0.496523	-0.0360725	0.102416	-0.0948414	-0.222903	-0.126678	0.102396	-0.139666	-0.290595	-0.187781	-0.195927	0.797225	-0.350497	0.0500382	-0.0544242	0.5033	-0.144251	0.0183518	-0.0414838	-0.0805284	-0.0800285	-0.224084	-0.267181	-0.0201051	0.0371131	0.301466
O95292	VAPB	-0.00853686	-0.0399677	-0.220652	0.0528644	-0.169926	-0.0406552	0.208567	-0.0422985	-0.189669	-0.141744	-0.316733	0.190779	-0.193512	-0.0797297	0.0931026	-0.206089	0.0737457	-0.130213	-0.0174554	-0.239626	-0.332104	-0.22542	-0.0720632	0.00264252	-0.77694	-0.0390877	-0.210846	-0.224524	-0.15765	-0.40156	-0.570889	-0.333818	-0.684976	0.0234716	-0.239837	0.173481	-0.12636	-0.101253	-0.0997445	-0.0259345	0.217522	-0.270318	-0.125877	-0.429189	0.1016	-0.470237	-0.293459	-0.101488
O95295	SNAPIN	-0.071341	-0.0714452	-0.0705412	-0.0720964	0.63155	0.723634	1.64989	-0.619474	-0.295369	-0.208665	-0.0355432	0.0142663	-0.472641	-0.276676	-0.381321	-0.253848	-0.136769	-0.264003	-0.281933	-0.258279	-0.11661	-0.093549	-0.720682	-0.497204	-0.723935	-0.639631	-0.469023	-0.440926	-0.359134	-0.345002	-0.469444	-0.472493	-0.450783	-0.23255	-0.239229	-0.591643	-0.11286	-0.298761	-0.252058	-0.312557	0.471467	0.0769914	-0.889127	-0.293291	-0.282191	-0.0492073	-0.122818	-0.070381
O95298	NDUFC2	0.00388353	-0.138878	-0.109098	-0.0532446	-0.385086	-0.282405	-0.0987761	-0.237331	0.0609716	-0.232844	-0.278931	-0.162173	-0.0561519	-0.198542	-0.27846	-0.0795868	-0.017995	0.0256893	-0.0602509	0.182389	-0.195277	-0.39223	-0.557136	-0.456284	0.243131	-0.16872	0.0630792	-0.548112	-0.502524	0.00640092	0.528257	-0.181783	0.178353	-0.00972058	0.095536	-0.356775	-0.263857	0.467682	0.0875591	0.135837	-0.0720874	0.0742025	0.12408	-0.193501	-0.29495	-0.530076	-0.230724	0.0901832
O95299	NDUFA10	0.339375	-0.134674	0.259061	0.0747537	-0.429719	-0.482577	0.00578013	-0.0155266	0.127983	0.0210878	-0.332106	-0.120606	0.840314	0.561339	-0.0913082	0.0468183	0.191076	0.283184	0.17231	0.221884	-0.336709	-0.0431646	-0.297582	-0.286224	0.5469	0.0425381	0.299883	-0.256559	-0.168262	0.128728	0.432316	-0.34619	0.173997	0.207224	0.400102	-0.290467	-0.17037	0.204787	0.0994237	0.243498	-0.20695	0.20751	0.331215	-0.0447367	0.0821146	-0.258676	-0.0665531	0.452104
O95302	FKBP9	-0.0493135	0.0169809	0.000539681	0.416957	0.0380906	-0.0126732	0.258043	0.31887	0.139194	0.185953	0.485132	0.410463	0.0492416	-0.0305978	0.0468037	0.168501	0.31215	0.310807	0.388437	0.103209	0.222067	0.580231	0.245782	0.0881812	0.294216	0.187775	-0.0443834	-0.175305	0.0714148	0.142902	-0.221135	0.379881	-0.120491	-0.037547	0.132195	0.149594	0.119152	0.192137	0.183233	-0.578992	0.0855194	-0.492447	0.00717042	-0.403665	-0.105229	0.278131	-0.0113888	0.128665
O95336	PGLS	-0.0164212	0.00950191	-0.674099	0.283607	-0.203326	0.184486	-0.0616784	-0.267636	0.084548	-0.0731613	-0.102146	0.222404	0.0403454	-0.0736852	0.241684	0.0795968	0.11609	0.122694	0.192827	-0.144384	0.123231	0.357807	-0.0338012	-0.356874	0.345816	0.0794782	-0.0939201	0.0248914	0.00223415	0.120743	-0.20165	0.115322	-0.106535	-0.0837341	-0.0405951	0.477533	-0.0167483	0.00575203	0.275515	-0.215125	-0.383462	-0.120086	-0.224535	0.00154884	-0.323395	-0.137585	0.131257	-0.0306959
O95340	PAPSS2	-0.461369	-0.387302	-0.245609	-0.15233	-0.550821	-0.332892	-0.471402	-0.51726	-0.454494	-0.168641	-0.365193	-0.00460154	-0.413186	-0.0812014	-0.504291	-0.544754	-0.470782	-0.367456	-0.294669	-0.214395	-0.0825467	0.130446	-0.0124692	0.0228716	-0.0445701	0.0855117	-0.276387	-0.355985	-0.121658	-0.183376	-0.241183	-0.0274508	-0.280916	-0.132607	-0.224242	0.102139	-0.0430563	-0.57143	-0.272293	-0.494431	-0.214257	-0.630374	-0.336861	-0.327326	-0.0714106	-0.0723681	-0.0719338	-0.189287
O95352	ATG7	0.402305	0.473828	0.175571	0.138716	-0.143424	0.080442	-0.055611	-0.0224794	-0.0109315	-0.0680235	-0.0785152	0.426802	-0.135332	-0.324635	-0.0286753	0.106951	-0.135233	0.319056	0.1478	0.251008	0.190802	0.494093	-0.0836342	-0.0760783	0.262759	0.0433038	0.0301048	0.0222005	0.306248	-0.298077	-0.308053	0.162664	-0.333843	-0.190313	-0.219055	0.16143	-0.385126	-0.263478	-0.0378805	-0.389408	-0.485372	-0.565918	-0.210641	-0.288188	-0.252744	0.222421	0.100932	-0.00907624
O95363	FARS2	-0.071341	-0.0714452	-0.0705412	-0.0720964	-0.0721662	-0.0722391	-0.0722065	-0.0726154	-0.0718019	-0.0710434	-0.072789	-0.0713537	-0.0705533	-0.0704325	-0.0710548	-0.0713588	-0.0713768	-0.0722234	-0.0711924	-0.0241071	0.304528	0.0193519	-0.0720632	-0.072483	-0.0735226	-0.0722858	-0.0666033	-0.0683238	-0.0740938	-0.0712652	-0.0701293	-0.0708997	-0.0700396	-0.0667255	-0.0654228	-0.0757322	-0.0653662	-0.0710484	-0.072427	-0.0696482	-0.0732392	-0.0716616	-0.0720372	-0.0713852	-0.0714106	-0.0723681	-0.0719338	-0.070381
O95372	LYPLA2	0.519464	-0.0600023	-0.250384	0.115854	-0.373358	0.471708	-0.499585	-0.060338	0.0629583	0.252102	-0.00167155	-0.0199473	0.317632	0.113829	0.45599	0.0283513	0.26149	0.174806	-0.159722	0.353144	0.390178	-0.0163197	0.596426	-0.0340648	0.607183	-0.162946	-0.0280781	0.614508	-0.0845955	-0.0412526	0.360583	0.238198	0.436475	-0.064792	-0.00508198	-0.0819249	-0.161689	0.278843	0.198766	0.0596783	0.0873281	0.269321	0.794452	-0.0408444	-0.331857	-0.20775	-0.234036	-0.184205
O95373	IPO7	-0.253081	-0.543396	-0.390565	-0.190367	-0.279088	-0.19173	-0.151091	-0.109115	-0.34949	-0.469136	-0.398623	-0.16582	-0.346471	-0.536121	-0.467692	-0.279785	-0.173714	-0.148802	0.246679	0.251706	-0.254216	-0.152329	-0.273395	-0.320662	-0.0261523	0.0511218	-0.233775	-0.275238	-0.198177	-0.175445	-0.246886	-0.34619	-0.318833	-0.0341892	-0.171961	0.102931	-0.174587	-0.378397	-0.043918	-0.0892855	0.291715	-0.0106707	-0.163567	-0.120528	-0.290521	0.0556562	-0.0379381	-0.438529
O95379	TNFAIP8	-0.071341	-0.0714452	-0.0705412	-0.0720964	-0.0721662	-0.0722391	-0.0722065	-0.0726154	-0.0718019	-0.0710434	-0.072789	-0.0713537	-0.0705533	-0.0704325	-0.0710548	-0.0713588	-0.0713768	-0.0722234	-0.0711924	-0.0705648	-0.0705155	-0.0709777	-0.0720632	-0.072483	-0.0735226	-0.0722858	-0.17937	-0.23237	0.767755	-0.0712652	-0.0701293	-0.0708997	-0.0700396	-0.0667255	-0.0654228	-0.0757322	-0.0653662	-0.0710484	-0.072427	-0.0696482	-0.0732392	-0.0716616	-0.0720372	-0.0713852	-0.0714106	-0.0723681	-0.0719338	-0.070381
O95394	PGM3	-0.071341	-0.0714452	-0.0705412	-0.0720964	-0.319653	0.236324	-0.364102	0.144047	-0.128684	0.335541	-0.385622	0.390521	-0.371145	-0.786196	-0.285839	-0.042341	-0.540964	-0.243681	0.12799	-0.204053	-0.498941	-0.279279	-0.429426	-0.249151	0.013189	0.0478169	-0.310558	-0.56879	0.122666	0.0479538	-0.173874	-0.0424039	-0.140453	0.183602	-0.62551	0.645436	-0.176066	-0.509531	-0.252154	-0.521077	-0.258262	-0.57346	-0.428669	-0.073015	-0.35219	0.130988	-0.100353	-0.070381
O95396	MOCS3	-0.0638851	0.12828	0.155249	-0.0688814	0.14869	0.0451976	0.158469	-0.228946	-0.139598	-0.124349	-0.023001	-0.22202	-0.35959	-0.400766	-0.430206	0.161486	0.28239	0.325934	0.30993	-0.257649	-0.63835	-0.785225	-0.158947	0.741243	0.0328104	-0.0112589	0.0811059	-0.0127869	-0.364894	-0.409331	-0.088982	-0.0262311	0.0170315	0.013932	-0.186997	-0.341792	-0.183771	0.144291	0.0335784	0.183311	-0.358865	-0.22251	-0.0103295	-0.27599	0.183484	-0.236873	-0.155349	-0.121509
O95400	CD2BP2	-0.16137	-0.10982	-0.098154	-0.0790625	-0.460747	-0.230284	-0.0645798	-0.417562	-0.378151	-0.261782	-0.668432	-0.164132	-0.268326	-0.0910119	-0.219123	-0.123289	-0.110479	-0.0517476	0.0689592	-0.0745889	0.0137534	-0.0199515	-0.264603	0.122743	-0.0342725	0.283586	-0.238241	-0.146677	-0.244871	-0.141447	-0.15587	0.0123161	-0.164752	-0.153753	-0.217489	0.118063	0.14582	-0.220008	-0.226743	-0.725472	-0.675754	-0.740524	-0.238502	-0.170926	0.450514	0.242937	0.0626874	-0.197964
O95425	SVIL	0.109241	0.189526	0.359685	0.0280861	-0.0620747	-0.00365784	0.0389521	0.316801	0.00182515	-0.0795655	0.0163363	0.0677087	-0.215511	0.535258	0.244955	-0.0208486	0.0784049	-0.000201576	-0.0338259	-0.196459	-0.028398	-0.100183	0.0831511	-0.0304027	-0.0786646	0.0525591	0.0458348	0.0245487	0.010502	0.247847	-0.44491	-0.00121966	-0.100865	-0.140404	-0.174054	0.0431658	-0.155895	-0.336022	-0.448395	-0.107685	-0.00401629	-0.0936194	0.12459	0.0766622	0.250079	0.248525	0.100132	0.121437
O95429	BAG4	-0.071341	-0.0714452	-0.0705412	-0.0720964	-0.0721662	-0.0722391	-0.0722065	-0.0726154	-0.0718019	-0.0710434	-0.072789	-0.0713537	-0.0705533	-0.0704325	-0.0710548	-0.0713588	-0.0713768	-0.0722234	-0.0711924	-0.0705648	-0.0705155	-0.0709777	-0.0720632	-0.072483	-0.0735226	-0.0722858	-0.0666033	-0.0683238	-0.0740938	-0.0712652	-0.0701293	-0.0708997	-0.0700396	0.117217	-0.02741	0.458105	-0.0983792	-0.0710484	-0.072427	-0.0696482	-0.0732392	-0.0716616	-0.0720372	-0.0713852	-0.0714106	-0.0723681	-0.0719338	-0.070381
O95433	AHSA1	0.602118	-0.129173	0.168797	0.0782863	0.16118	-0.131295	-0.122541	0.0137252	0.180116	-0.108321	-0.0968698	0.184526	0.153988	0.0652429	0.0393525	0.27415	-0.0827765	0.159946	0.334968	0.571693	0.0369384	0.257493	0.0495123	0.268353	0.410466	0.555314	0.159046	0.106188	0.358119	0.189704	-0.153765	0.278974	0.0605887	0.214323	-0.0486999	0.241123	0.249737	0.0665123	0.117422	0.385045	0.109709	0.0864451	0.209993	0.437504	-5.90782e-18	0.292001	0.194439	0.34405
O95453	PARN	0.39872	0.2903	0.37435	0.389857	0.574742	0.372467	0.527314	0.111939	0.489513	0.447365	0.52782	0.258355	0.596162	0.400098	0.473438	0.633939	0.581624	0.513797	0.724487	0.334134	0.395663	0.329689	0.445716	0.569202	-0.619373	0.424429	0.258079	0.302669	0.0921186	0.298159	0.0899388	0.402471	0.327467	0.408297	0.582374	0.297986	0.529074	0.631576	0.618506	0.514643	0.326875	0.485984	0.270029	0.469878	0.311233	0.185092	0.342013	0.51035
O95466	FMNL1	-0.071341	-0.0714452	-0.0705412	-0.0720964	-0.0721662	-0.0722391	-0.0722065	-0.0726154	-0.0718019	-0.0710434	-0.072789	-0.0713537	-0.0705533	-0.0704325	-0.0710548	-0.0713588	-0.0713768	-0.0722234	-0.0711924	-0.0705648	-0.0705155	-0.0709777	-0.0720632	-0.072483	-0.0735226	-0.0722858	-0.555377	-0.601534	0.833557	-0.0712652	-0.0701293	-0.0708997	-0.0700396	-0.0667255	-0.0654228	-0.0757322	-0.0653662	-0.0710484	-0.072427	-0.0696482	-0.0732392	-0.0716616	-0.0720372	-0.0713852	-0.0714106	-0.0723681	-0.0719338	-0.070381
O95470	SGPL1	0.110542	-0.0400743	-0.0621817	0.131213	0.0686107	-0.023738	0.180274	0.210946	0.0800639	0.0636427	0.103845	0.309099	-0.177942	-0.324635	-0.327024	0.390692	0.251318	0.520409	0.373665	-0.0641752	-0.0700242	0.208361	-0.395466	-0.0145445	0.783662	-0.0126659	-0.108873	-0.218082	0.549606	0.293811	0.0458433	0.0732688	0.0514163	-0.0823989	-0.253843	0.202033	-0.00763068	-0.190313	0.207749	0.0978995	0.682911	0.269321	0.00383536	0.215705	0.128551	0.0904095	0.530856	-0.0121943
O95479	H6PD	0.0934515	-0.0329839	0.00882455	0.32391	-0.612083	-0.173013	-0.240949	-0.00961895	-0.0962066	0.276585	0.165721	0.259428	-0.0952522	-0.0173322	0.00410421	-0.0306484	-0.801578	-0.292319	-0.615418	-0.0875441	-0.315315	0.427539	-0.392203	-0.485779	-0.0573447	-0.544269	0.22403	0.131703	0.746768	-0.0634135	-0.249052	-0.0105183	-0.0908742	-2.09919	-2.17901	-1.14751	-0.860931	0.0675803	0.160057	-0.419333	-0.323986	0.0279425	-0.121537	-0.17608	0.426603	0.278131	0.295164	0.0557707
O95486	SEC24A	0.284685	0.367758	0.519334	0.481347	-0.0342928	-0.00870639	-0.0169081	0.308453	-0.536411	0.0348039	-0.548028	0.171432	-0.291815	-0.292149	-0.295209	-0.175463	-0.0654125	-0.0145854	0.0317434	0.152706	0.0499391	0.0924411	-0.104005	0.217233	-0.00435399	0.599071	-0.189696	-0.120413	0.001383	0.13599	-0.272514	0.0562341	-0.217902	0.0141525	-0.141484	0.519359	0.228415	0.094957	0.427457	-0.938574	0.0873281	-0.168439	-0.244479	0.173469	-0.261548	0.471347	-0.0604629	0.199795
O95487	SEC24B	-0.071341	-0.0714452	-0.0705412	-0.0720964	-0.0100382	0.11386	0.209852	0.124829	-0.485845	-0.268076	-0.548028	-0.0823963	-0.245425	-0.144218	-0.319038	0.142484	-0.197623	-0.00165928	0.141408	0.0821468	-0.168396	-0.168934	-0.496324	0.179318	0.14239	0.118623	-0.0346602	0.096973	0.104598	0.384892	-0.137285	0.33084	-0.0769119	-0.248585	-0.224915	0.31674	-0.122118	-0.219312	0.504066	-0.359239	-0.0993604	-0.278426	-0.213412	-0.192009	-0.725107	0.429292	-0.0336933	-0.070381
O95563	MPC2	-0.38108	-0.0852007	0.392312	-0.273528	-0.165886	-0.157969	-0.36685	0.0318228	-0.386505	-0.245815	-0.211375	-0.13085	-0.318347	-0.269561	-0.352912	-0.0660442	-0.348568	-0.306324	-0.12343	-0.216778	-0.18599	-0.129967	-0.354289	0.0804684	-0.0952447	-0.123273	-0.326571	-1.12581	-0.195652	0.0733984	0.328895	-0.123561	-0.0916569	-0.0916676	-0.036864	0.200844	-0.151488	-0.392241	-0.204589	-0.494431	-0.214257	-0.630374	0.115496	-0.380316	-0.201299	0.0656632	-0.150372	0.522608
O95571	ETHE1	-0.0979312	-0.268201	0.134046	0.119705	0.143753	0.285145	0.302021	0.530976	0.154701	0.143863	0.248102	0.0201141	0.359112	0.38601	0.0197182	0.143413	0.0585012	0.0250488	-0.0362003	-0.476514	-0.231998	-0.166682	0.318163	0.0323718	0.402109	-0.117443	0.199014	0.10929	0.334196	-0.364043	0.218221	-0.241886	0.299682	0.0755484	0.0726839	-0.206785	-0.152936	-0.0600661	-0.135514	0.288391	0.12008	-0.0885655	0.387137	-0.098737	0.0248901	-0.148949	0.125889	0.0362932
O95573	ACSL3	-0.109762	-0.0543389	0.0838389	-0.186478	0.380471	-0.156169	-0.114628	-0.173733	-0.21904	-0.182183	-0.251063	-0.112799	-0.0786562	0.124853	-0.0458195	-0.300965	-0.462823	-0.132057	-0.244885	-0.365939	-0.386805	0.0626677	0.147038	0.104445	-0.0504585	0.0170299	-0.0189938	-0.192874	-0.332598	-0.10986	0.144627	-0.220524	0.00811381	-0.201613	0.0211762	0.0500382	-0.0891645	-0.0828609	-0.167899	0.0810848	-0.0241274	-0.171555	0.12408	-0.283864	-0.15717	0.0596636	-0.199521	0.322062
O95602	POLR1A	0.270949	0.242089	0.47086	0.347621	-0.116715	-0.00995701	-0.295327	-0.0166961	0.14886	0.13592	-0.0776493	-0.162093	-0.192031	0.0126679	-0.100052	0.295151	0.220942	0.343012	0.177817	0.24373	0.380167	0.0955292	0.289902	0.25976	0.0536721	0.147423	0.334094	0.204162	0.171113	0.412012	0.103162	0.597534	0.539115	-0.0241551	0.0688368	-0.252469	0.0153676	-0.127358	0.264775	0.0581374	0.477592	0.137147	0.0822789	0.755199	-0.0714106	-0.0723681	-0.0719338	0.392034
O95671	ASMTL	-0.716459	-0.430517	-0.361395	-0.881412	-0.260981	-0.329983	-0.256475	-0.216946	-0.402522	-0.455502	-0.270518	-0.370265	-0.304011	-0.277566	-0.34976	-0.308793	-1.24369	-0.948804	-0.443154	-0.375347	-0.445518	-0.525757	-0.321313	-0.500944	-0.619373	-0.530193	-0.265179	0.00686578	-0.350944	-0.481849	-0.405567	-0.390185	-0.363272	-0.453173	-0.14279	-0.421564	-0.133433	-0.041218	-0.599552	-0.324969	-0.411417	-0.317039	-0.340701	-0.433475	0.0469724	-0.371233	-0.594912	-0.888006
O95674	CDS2	0.230924	0.322941	0.16109	0.260094	-0.238301	-0.464824	-0.108194	0.0938622	-0.458162	0.0300528	0.0260088	0.153655	-0.320584	0.0652429	-0.231505	-0.247604	-0.0946612	-0.234153	0.0068869	-0.379522	-0.193879	-0.0754898	0.0754911	0.169209	-0.151702	-0.134234	-0.207837	-0.325817	-0.345202	0.308703	-0.13087	-0.405616	-0.101218	0.113236	0.103913	-0.204435	-0.148598	-0.208557	0.225921	-0.198243	0.49523	-0.187917	-0.0212268	-0.380316	0.431675	0.64804	0.232074	-0.0891172
O95716	RAB3D	0.134342	-0.0134389	0.2265	0.247284	-0.0133938	-0.0796728	0.0446082	0.213806	-0.0188669	-0.429289	-0.180326	-0.152132	-0.166588	0.381981	-0.21766	0.114703	0.0704653	0.23442	0.000576298	-0.21774	0.0478739	-0.0431646	0.616964	0.0423554	0.269659	0.353863	-0.156525	0.00780623	-0.512421	-0.171322	0.0645569	0.243792	0.103677	-0.0246854	-0.0616278	0.166814	-0.135963	0.174594	-0.0784007	0.141747	0.423535	0.594093	-0.297414	0.174396	0.214136	-0.203937	-0.0351126	-0.35394
O95721	SNAP29	-0.201349	-0.523654	-0.48818	-0.0793073	-0.145806	-0.121118	-0.277691	-0.119183	-0.124245	-0.15472	0.186511	-0.0082194	-0.0398918	-0.0834521	-0.258554	-0.275745	-0.234615	-0.273421	-0.171374	-0.328347	-0.165141	-0.229033	-0.134977	0.0631771	-0.102233	0.146574	0.263308	0.186554	0.0705581	-0.115896	-0.0991372	-0.0213502	-0.0532541	-0.158375	-0.00593742	-0.227751	-0.146576	0.0776088	-0.0189994	-0.0387747	-0.000890464	0.129088	0.199211	-0.361304	-0.604279	-0.112665	-0.236083	-0.377549
O95747	OXSR1	-0.0758841	-0.0414954	-0.0575152	-0.267019	0.000490986	-0.104132	-0.074707	-0.297079	0.144205	0.0598124	-0.039638	-0.246348	0.0753066	0.0752811	0.0913983	-0.0287601	0.278908	0.138924	-0.267702	0.23811	0.117219	0.00673487	0.219862	0.124001	0.20533	0.0880951	-0.0869961	0.0762908	-0.0517526	-0.323663	0.150919	0.0757838	0.0958599	0.19334	0.131213	-0.13599	0.368343	0.204407	-0.364196	0.0260962	-0.250463	-0.21114	-0.0122309	-0.197176	0.103727	-0.246622	-0.221005	-0.267883
O95757	HSPA4L	0.781274	0.450048	0.901017	0.348586	0.338327	0.362673	0.0917248	0.141939	0.904391	0.843429	0.786443	0.442182	0.723226	0.376661	0.541128	1.10045	1.33379	1.17993	0.9904	1.11808	0.675319	0.692196	1.02122	0.957504	-1.45867	0.941607	0.898581	0.467247	0.415848	0.602294	0.810724	0.723678	1.05209	0.824628	0.355471	0.497337	0.7788	0.815559	0.499195	0.901858	0.431828	0.551957	1.32415	0.036599	1.01332	0.639191	0.682804	0.574048
O95758	PTBP3	-0.311436	-0.229854	-0.209736	-0.411142	0.0777955	0.152803	0.121276	-0.324092	-0.283917	-0.599753	-0.152565	-0.889605	-0.627094	-0.653735	-0.699953	-0.176108	-0.337964	-0.175916	-0.360742	-0.41124	-0.493232	-0.52033	-0.116857	0.0433777	0.163858	-0.253905	-0.340632	-0.194903	-0.0670861	-0.304437	0.0279363	-0.0810626	-0.130182	-0.0580905	-0.132823	-0.35141	-0.249447	0.00263977	-0.122543	0.115715	-0.333244	-0.0132174	0.0426137	-0.222765	-0.209354	-0.22947	-0.0243018	-0.481607
O95777	LSM8	0.126661	0.146279	0.0960593	0.107914	0.457245	0.103852	0.261543	0.342223	0.429116	0.139637	0.345457	-0.0980145	0.304875	0.094376	0.366883	0.266238	-0.00859062	0.23558	0.0104087	-0.0693007	-0.114587	-0.0977807	0.263506	0.428797	-0.67718	0.263965	-0.0267753	0.173494	0.202345	-0.164968	-0.0446714	0.220843	-0.0265244	0.130625	0.167923	0.356868	0.420991	0.206431	0.174717	0.183311	0.0228968	-0.00423741	0.708556	-0.535531	0.0996948	0.101876	0.122878	0.0678655
O95782	AP2A1	-0.210958	-0.142564	-0.285109	-0.238617	-0.215184	-0.219469	-0.277691	0.0170421	-0.257168	-0.518879	-0.171226	-0.305774	-0.243939	-0.210299	-0.213943	-0.310643	-0.290374	-0.277782	-0.394135	-0.572521	-0.675814	-0.479292	-0.288021	-0.246652	-0.213538	-0.447786	-0.255735	-0.368111	-0.366927	-0.366965	-0.186896	-0.41776	-0.253224	-0.293904	-0.199772	0.143053	-0.0529377	-0.232788	-0.293051	-0.302479	-0.273427	-0.29969	-0.284528	-0.400373	-0.115167	-0.179151	-0.237317	-0.277974
O95793	STAU1	0.149547	0.184364	-0.132896	0.150735	-0.125541	0.133045	0.138737	0.00540685	0.0318016	0.0675689	0.157934	0.142922	0.410537	0.0689438	-0.0254269	0.105286	-0.319596	-0.123314	-0.0530909	0.0157763	-0.196557	-0.113748	0.213015	0.451505	0.499045	0.00764884	0.205197	-0.0371015	0.250439	0.038403	0.0929317	-0.0887887	-0.0793542	0.213753	0.31726	-0.151282	0.167629	-0.0229635	0.0240647	0.291685	-0.226188	0.367314	-0.0390742	0.180758	0.210885	-0.0263403	0.256993	0.365601
O95801	TTC4	-0.326783	-0.286365	-0.294932	-0.179439	-0.0466385	-0.132733	-0.251641	-0.340336	-0.203568	-0.234926	-0.0655344	-0.226574	-0.409925	-0.273617	-0.406241	-0.0921409	-0.0399804	-0.165391	0.147117	-0.300869	-0.19043	-0.611526	-0.361509	-0.516593	-0.174375	-0.203249	-0.273892	-0.252951	-0.738287	0.329095	-0.560416	0.788221	-0.564547	-0.323401	-0.314851	-0.602065	-0.154626	-0.120382	0.332179	-0.387106	-0.226729	-0.315303	-0.161481	-0.14826	-0.0843605	-0.0607612	-0.0258318	-0.22033
O95816	BAG2	0.00166389	-0.0838854	-0.0568528	0.0759867	-0.265116	-0.526965	-0.431723	-0.222773	-0.874581	-0.423279	-0.337206	0.491647	-0.468207	-0.246012	-0.479394	-0.36427	-0.333879	-0.584161	0.189118	-0.621612	-0.751377	-0.128651	-0.451245	-0.131413	-0.0822794	-0.467507	-0.628328	-0.607955	-0.691979	0.103677	-0.451958	-0.0798033	-0.383071	-0.516166	-0.115611	-0.231224	-0.819215	-0.83416	0.416735	0.0513086	0.128154	0.105428	-0.398722	0.416606	-0.146614	0.193888	-0.0976709	0.225748
O95817	BAG3	-0.213624	-0.364749	-0.602982	0.245975	0.117854	0.0184225	0.0139584	-0.420426	0.0794963	-0.316573	0.0947046	0.0311018	-0.216679	-0.300635	-0.351555	-0.220193	0.00281538	0.38086	0.40893	-0.211505	-0.364656	-0.160114	-0.135284	-0.265563	-0.254076	-0.166192	-0.342853	-0.334303	-0.0058639	-0.171322	-0.0351158	-0.492126	-0.345778	-0.231485	-0.133909	0.609628	-0.17295	-0.249725	-0.276	-0.600352	-0.798347	-0.214373	-0.183257	-0.386502	0.24456	-0.447316	0.471247	-0.527018
O95819	MAP4K4	-0.159703	0.155389	0.527854	0.271588	0.0118759	0.366977	0.264043	0.0660149	0.17915	0.658891	0.289915	0.0823572	0.341905	-0.173431	-0.202825	0.0374917	0.298781	0.361795	0.175423	0.289856	0.2807	0.0947553	-0.0824098	0.35703	0.295813	0.352691	0.175002	0.290365	0.445945	-0.0339746	0.137778	0.186807	0.1728	0.0458267	0.0568281	0.0741887	0.260458	0.133949	0.545836	0.273191	0.299307	0.252351	0.284085	0.26807	0.237583	-0.0134468	0.171401	0.126957
O95822	MLYCD	-0.168666	-0.0340267	-0.0849607	0.0759086	-0.224749	-0.202367	-0.211301	-0.304877	-0.231028	-0.204793	-0.0547449	-0.0935864	-0.138658	-0.25869	-0.354976	-0.019443	-0.508616	-0.393191	-0.247065	-0.19473	-0.182235	-0.495897	-0.099446	0.350551	0.217977	0.0585994	0.0519352	-0.17827	-0.131063	-0.0712652	-0.0701293	-0.0708997	-0.0700396	-0.203786	-0.195551	-0.559324	-0.00293983	-0.333352	-0.317676	-0.183114	0.000295909	-0.110521	-0.0232233	-0.104157	-0.0714106	-0.0723681	-0.0719338	-0.193282
O95831	AIFM1	-0.142773	-0.357826	-0.0479978	-0.141978	-0.147625	-0.0288377	-0.437386	-0.143615	0.15329	0.271013	0.0165912	-0.186839	0.223433	-0.0718693	-0.0520908	0.158054	-0.289486	-0.0726206	-0.129734	0.0522383	-0.27238	-0.119129	0.00625447	0.00818581	0.0229491	-0.0477729	-0.0914012	-0.259637	-0.181872	-0.0634135	0.14986	-0.279469	-0.0454598	0.14796	0.213909	-0.168479	-0.0333518	-0.0239827	-0.0976251	-0.0403498	0.0140525	0.142906	0.405401	-0.0317975	-0.1743	-0.133011	-0.0787242	0.393602
O95834	EML2	0.191051	0.196103	0.56495	0.425577	-0.0112308	0.365031	0.497313	0.32815	0.42603	0.170542	0.200212	0.0725297	0.195221	0.00696747	0.0422953	0.525797	0.401292	0.445981	0.384741	0.0594932	-0.305415	0.210482	0.170476	0.217233	0.00661393	0.0170299	-0.172842	-0.0213825	0.13049	0.0912862	0.26028	0.385137	0.121581	0.123118	0.150124	0.111631	0.0785871	0.285798	0.1893	-0.0095867	-0.0613473	0.274282	0.196232	0.119972	0.298341	0.115323	0.204299	0.190356
O95848	NUDT14	-0.071341	-0.0714452	-0.0705412	-0.0720964	-0.0721662	-0.0722391	-0.0722065	-0.0726154	-0.0718019	-0.0710434	-0.072789	-0.0713537	-0.0705533	-0.0704325	-0.0710548	-0.0713588	-0.0713768	-0.0722234	-0.0711924	-0.0705648	-0.0705155	-0.0709777	-0.0720632	-0.072483	-0.0735226	-0.0722858	-0.0666033	-0.0683238	-0.0740938	-0.0712652	-0.0701293	-0.0708997	-0.0700396	-0.0667255	-0.0654228	-0.0757322	-0.0653662	-0.0710484	-0.072427	-0.03273	0.708271	0.588825	-0.0720372	-0.0713852	-0.0714106	-0.0723681	-0.0719338	-0.070381
O95861	BPNT1	0.0720057	-0.118675	-0.0927393	0.0210834	0.252484	0.200538	0.106043	0.108312	0.30154	0.0300528	0.549339	0.157755	-0.110142	-0.0491377	-0.0697353	0.0202467	-0.243562	-0.101568	-0.148704	-0.223189	0.0752769	-0.578381	0.197924	0.386914	0.112631	0.20894	-0.253836	0.364263	-0.145124	-0.00792833	0.655898	0.587561	0.77497	-0.133179	-0.155331	0.0406995	-0.0926624	-0.0481342	-0.186426	0.285691	-0.0768363	0.286413	-0.0529964	-0.070947	0.00648221	0.247657	0.0272848	0.289776
O95865	DDAH2	-1.14156	-0.985549	-1.33735	-1.17423	-0.828962	-1.01148	-0.655046	-0.437909	-0.780018	-0.905806	-0.898632	-0.802314	-0.641129	-0.646397	-0.259773	-0.456677	-0.389418	-0.353874	-0.654802	-0.50517	-0.202611	0.14329	-0.413556	-0.717782	-0.811299	-0.646203	-1.25956	-0.997148	-1.06129	-1.20471	-0.707937	-0.973754	-0.673854	-0.343783	-0.485719	0.657779	-0.616517	-0.810044	-0.951051	-0.966519	-0.652093	-0.95954	-0.84568	-0.968463	-0.8457	-0.894709	-0.763166	-1.04476
O95870	ABHD16A	-0.071341	-0.0714452	-0.0705412	-0.0720964	0.0157692	0.0144481	0.0434264	0.221179	-0.0718019	-0.0710434	-0.072789	-0.0713537	-0.347642	-0.419203	-0.223422	-0.274467	-0.442512	-0.264003	0.0717952	-0.271858	0.0998125	0.220297	-0.026679	0.185322	0.213897	0.00281128	-0.463604	0.0889516	0.0940166	0.0733984	-0.310324	0.0105302	-0.106535	-0.195821	0.0270895	0.105928	-0.133433	-0.345832	-0.158432	-0.0823099	0.281328	-0.043198	-0.0304578	-0.131707	-0.691854	-0.255277	-0.347887	-0.070381
O95881	TXNDC12	-0.122159	-0.00358792	-0.150441	0.122785	-0.32299	-0.131295	-0.0766218	0.200788	0.113157	-0.0480398	-0.160763	0.0525867	0.0582434	0.126097	0.192929	0.0629461	0.177686	0.109155	-0.0191247	0.122821	0.0329469	0.262938	0.235516	0.0212766	0.225162	0.40842	-0.00329872	0.0474742	0.276803	-0.150469	0.11018	0.195301	0.131221	0.126237	-0.0164593	0.447409	0.212336	0.046805	0.0659465	-0.261732	-0.216324	-0.0997472	0.118853	-0.108209	0.188075	0.0577516	0.0879026	-0.202007
O95989	NUDT3	0.33522	0.406808	0.429046	0.37373	0.500385	1.09482	0.434493	0.0631485	-0.0718019	-0.0710434	-0.072789	-0.0713537	0.281112	0.234258	0.560715	0.125066	0.12119	-0.0346107	0.114865	-0.192605	0.601174	0.434489	0.566898	0.86195	-0.0735226	0.482779	-0.127158	0.444878	0.290723	-0.0712652	-0.0701293	-0.0708997	-0.0700396	-0.0194809	0.228824	-0.229228	0.246326	0.192365	0.171272	-0.268408	-0.193215	-0.0694569	0.104553	0.0381316	-0.299468	-0.165198	-0.207606	0.13184
O96000	NDUFB10	0.0849586	-0.0347326	-0.42223	-0.0342792	-0.315687	-0.434153	-0.0116415	0.0300738	0.320049	0.244717	-5.90782e-18	0.172984	0.39849	0.00777299	-0.390468	-0.267594	-0.136717	-0.234401	-0.182423	0.0346475	-0.308716	-0.162574	-0.0300258	-0.294302	-0.708707	-0.163967	0.208757	-0.142507	-0.224654	0.0846578	0.509991	-0.0550166	0.15568	-0.0112386	0.204391	-0.524806	-0.181091	0.0782981	-0.0748074	0.131003	-0.633527	0.255404	0.230529	-0.173499	0.226324	-0.543209	-0.0954977	0.560842
O96005	CLPTM1	-0.455731	-0.254829	-0.0304001	0.0614909	-0.176148	-0.397417	-0.268225	0.217836	-0.438462	-0.184222	-0.0986144	0.223088	0.108097	0.0395549	0.336344	-0.306431	-0.401701	-0.212371	0.0619679	-0.360833	-0.230027	0.0638426	-0.115591	-0.395362	0.139148	-0.120339	-0.0586613	-0.210199	0.412198	0.173295	0.00778141	-0.194147	-0.445063	-0.379574	-0.00556806	-0.129236	-0.30542	0.0585446	0.289932	0.127686	-0.266078	-0.432553	-0.23639	-0.511273	0.0133281	0.282691	0.270714	0.12984
O96008	TOMM40	-0.0357616	-0.209524	-0.197005	0.0455532	0.263683	-0.0891127	-0.12071	0.222646	-0.345704	-0.0521526	-0.0503633	0.00489934	0.412094	0.333606	0.360028	-0.247604	-0.239083	-0.281308	-0.22429	0.0683533	0.238479	-0.0540821	-0.0359538	-0.0450392	0.159157	-0.0694458	-0.407867	-0.359729	-0.655165	0.0832834	-0.148258	-0.210995	0.0522908	0.0794447	0.653445	-0.0321521	0.38377	0.218996	0.469804	-0.377582	-0.0275099	-0.343354	-0.229727	-0.219968	-0.211988	0.107614	0.195627	0.368618
O96011	PEX11B	-0.0746137	0.137355	0.0320504	-0.322213	-0.222122	-0.100773	-0.304814	-0.457125	-0.0032263	-0.218896	0.043573	-0.227389	-0.165455	-0.0491377	-0.0765616	-0.17535	0.116065	-0.18378	-0.255665	-0.340425	-0.157365	-0.293366	0.0676974	-0.336885	0.00803661	-0.138374	-0.0905144	0.245028	-0.237671	-0.185519	-0.119078	-0.194417	-0.10193	-0.121396	-0.0222714	-0.153081	-0.177128	-0.0325139	0.0165571	-0.0696482	-0.0732392	-0.0716616	-0.243601	-0.317716	-0.310321	0.000873107	-0.195702	-0.0374761
O96019	ACTL6A	0.263693	0.34	0.0183272	0.320802	0.718372	0.520177	0.135184	0.224853	0.624422	0.837254	0.599986	0.452484	0.2921	0.409632	0.404222	-0.0869835	0.194497	-0.137797	-0.129734	0.221884	0.348007	0.264641	0.327948	0.0519084	0.243618	0.0124984	0.041918	0.183509	0.0839795	-0.179703	-0.00692813	-0.147131	0.00134299	0.151665	0.204391	-0.102334	0.283004	-0.0377313	-0.355951	0.0820405	-0.393255	-0.177505	0.149582	0.124185	-0.0714106	-0.0723681	-0.0719338	0.393718
P00167	CYB5A	-0.293849	-0.0699447	-0.159199	-0.268753	-0.569946	-0.351109	-0.437386	-0.525306	-0.314285	-0.464652	-0.357092	-0.938697	-0.379411	-0.373107	-0.236506	-0.208915	-0.255328	-0.141531	-0.507999	-0.211505	-0.269785	-0.85988	-0.379731	-0.36367	-0.181046	-0.390476	-0.503421	-0.403893	-0.633949	-0.442507	-0.610951	-0.584202	-0.485616	-0.139178	-0.48126	-1.02122	-0.768257	-0.543558	-0.82576	-0.938574	-0.239401	-0.271796	-0.200548	-0.671491	-0.323395	-0.393299	-0.562779	-0.219139
P00338	LDHA	-0.0579659	0.428534	0.572406	0.125337	0.31169	-0.0483388	0.0194706	0.474701	0.655383	-0.435661	0.211553	0.343246	0.324575	0.0213201	0.391721	0.199224	0.460471	0.357117	0.38161	0.300656	-0.193879	-0.23765	0.204817	0.121678	0.611935	0.453052	0.0462372	0.654527	0.0367776	0.182112	0.106631	0.454691	0.151122	-0.0482859	0.336764	0.771693	0.692599	0.431404	0.0411704	-0.290936	0.461878	0.788991	0.129529	0.0308505	0.150049	0.227644	0.119011	0.12984
P00352	ALDH1A1	-0.62115	-0.484894	-1.50018	-1.36091	-1.32269	-1.46259	-0.684905	0.206047	-1.53382	-0.443216	-1.31079	0.64001	-1.85448	-1.77955	-1.80729	-0.878363	-0.957135	-0.124878	-0.737499	-0.121696	0.120613	0.906819	-1.7433	-1.78724	-1.70939	-1.59137	-1.21176	-1.81683	-1.17469	-0.79782	-1.00655	-0.658461	-1.22528	-1.78304	-1.85401	-1.62487	-1.88344	-1.99089	-0.979843	-0.515181	-0.397643	-1.17266	-1.26515	-0.968198	-1.53486	0.270233	0.206192	-0.488551
P00367	GLUD1	-0.00520216	-0.225689	0.0112754	-0.353327	0.167453	-0.144653	-0.228903	0.140431	-0.22633	-0.218896	-0.318096	-0.21626	-0.153352	0.0359626	-0.0520908	-0.289471	-0.500497	-0.425898	-0.0684483	-0.223189	-0.35218	-0.260106	-0.254211	-0.154134	0.369	-0.380604	-0.233775	-0.166007	-0.203122	-0.211233	0.19667	-0.476273	-0.350451	-0.345438	-0.36857	-0.0842592	-0.275887	-0.380259	-0.291398	0.0886703	-0.207971	-0.331605	-0.17228	0.197521	-0.4385	-0.365403	-0.165044	-0.145776
P00387	CYB5R3	0.194708	0.375479	0.0891609	0.332546	-0.00764563	0.0830352	0.18432	0.339024	-0.0497532	0.173051	-0.0511812	0.351896	0.0144281	0.247424	0.147351	0.131604	0.140628	0.197209	0.199043	-0.0535404	0.138396	0.276874	0.0551666	-0.257328	-0.0615325	-0.328096	0.0477466	-0.00622002	-0.143816	0.00502894	0.123161	0.0849876	0.1105	-0.0786961	-0.185729	0.11382	0.01894	-0.230209	-0.29433	0.073878	0.0320151	0.368301	0.158454	0.0743548	0.0499085	0.300085	0.0438992	0.0267047
P00390	GSR	-0.440371	-0.249883	-0.0993283	0.18753	0.0714157	0.0284482	-0.186899	0.553301	-0.131881	-0.124797	0.054401	0.385268	-0.301568	-0.191917	-0.0219887	-0.221756	-0.183481	-0.102386	0.57423	0.0620805	-0.0851303	0.0684258	-0.276453	0.144127	-0.24374	-0.00818808	-0.131871	0.00510897	0.180743	-0.222437	-0.328663	0.0200005	-0.265453	-0.180018	-0.379662	0.264555	0.0395086	-0.164457	-0.137035	-1.35841	-0.600152	-0.0772446	-0.207832	-0.137024	-0.538771	-0.120092	-0.52356	-0.111805
P00395	MT-CO1	0.0663647	0.510538	0.468331	-0.174201	0.166241	0.127417	-0.364102	0.311812	-0.198323	0.411792	0.217407	-0.0935864	-0.117156	0.264294	0.0422953	-0.300965	0.0205976	-0.128094	0.212632	0.503179	0.925119	0.480471	0.469324	0.323853	0.643313	0.193737	0.394985	0.377604	-0.0272407	0.129327	1.09367	0.0142399	0.604053	-0.113228	-0.146077	0.11382	0.118325	0.465816	0.50776	-0.0736543	0.615187	0.266511	0.288712	0.283315	0.189959	0.510107	0.177007	-0.13533
P00403	MT-CO2	0.498445	1.02682	0.784698	0.157174	0.378643	0.598603	0.260432	0.668039	0.427149	0.59766	0.875922	0.244391	1.06357	0.998367	0.997669	0.248776	0.68183	0.474658	0.469682	0.812781	0.691805	-0.294691	0.761937	0.587366	1.37281	0.497334	1.21248	1.09592	0.828332	0.426988	1.05174	0.614424	0.610532	0.688664	0.651445	0.511645	0.706573	0.563762	0.593462	0.0504411	0.668952	0.969042	0.903724	0.394927	-0.193235	0.30304	0.0614506	0.716305
P00441	SOD1	-0.434057	-0.517498	-0.609085	-0.516934	-0.382593	-0.329172	-0.206431	-0.145779	-0.222258	-0.515431	-0.152565	-0.28959	-0.27659	-0.326841	-0.560976	-0.57441	-0.490236	-0.463687	-0.285565	-0.619003	-0.300275	-0.584665	-0.366668	-0.173932	0.07294	-0.256726	-0.324114	0.00510897	-0.664577	-0.689258	-0.720471	-0.41776	-0.3223	-0.269286	-0.350497	-0.0441562	-0.481934	-0.406172	-0.240974	-0.44101	-0.365902	-0.338264	-0.496022	-0.445714	-0.38719	-0.382661	-0.247391	-0.582918
P00450	CP	-1.05368	-1.14243	-0.307648	-1.00143	-1.2503	-1.17935	-1.24307	-1.00942	-1.43345	-1.11421	-1.52021	-1.16535	-1.12561	-1.08324	-1.04202	-1.35072	-1.19171	-1.33831	-1.26283	-1.4807	-1.07527	-0.875213	-1.23747	-1.42183	-0.50433	-1.28746	-1.38302	-1.26773	-0.754098	-1.35886	-1.49906	-1.20358	-1.02474	-1.16516	-1.19114	-1.16474	-0.993633	-1.23818	-1.22135	-0.641252	-1.71458	-1.39854	-1.41345	-1.23689	-0.89762	-1.10985	-1.1807	-1.08594
P00488	F13A1	-0.420137	-0.390345	0.329985	-0.379338	-0.391357	-0.149705	-0.0645798	-0.458518	-0.390621	-0.870747	0.0859719	-0.504378	-0.437898	-0.349834	-0.892235	0.801277	-0.185446	-0.390744	-0.328096	0.533456	-0.156168	0.576571	-0.74749	-0.470764	-0.456189	-1.06003	-0.490257	-0.0663595	-0.131063	-0.339708	0.0113779	-0.086016	-0.456216	0.151191	-0.336415	-0.76869	-0.739296	-0.388955	-0.102707	-0.0759614	0.247097	-0.485775	-0.722657	-0.784568	0.117372	-0.518772	1.0666	-0.514255
P00491	PNP	-0.953337	-1.09897	-1.12354	-0.790676	-1.20562	-0.926177	-1.22733	-0.224328	-0.893413	-1.08193	-1.2877	-0.988421	-1.04579	-1.43003	-1.35757	-1.0427	-1.13209	-1.12423	-1.1228	-1.03036	-1.51953	-1.31193	-0.769288	-0.284302	-0.407636	-0.342811	-1.17265	-1.1773	0.107641	-0.760832	-0.91833	-1.06554	-0.744867	-1.07254	-1.01904	0.754307	-0.715493	-1.22068	-1.11931	-1.69775	-0.234359	-0.917162	-0.903865	-0.771921	-1.37003	-1.05712	-0.687234	-0.399683
P00492	HPRT1	-0.989863	-0.511166	-0.584074	-0.911806	-1.05204	-0.751474	-0.83479	-0.72738	-0.585752	-1.63173	-0.831133	-0.863627	-0.869426	-1.18801	-0.973078	-0.820214	-1.08531	-0.960892	-0.712915	-0.956913	-1.76051	-1.59674	-1.7711	-0.593697	-1.18539	-0.742458	-0.826687	-1.07066	-0.683845	-1.22217	-0.650237	-1.1914	-1.17904	-0.697491	-1.11071	0.797074	-1.04586	-1.01497	-1.61419	-1.54377	-1.29634	-0.812557	-0.539207	-1.16228	-0.810263	-1.18096	-1.28313	-0.546826
P00505	GOT2	-0.301239	-0.383438	-0.198355	-0.681402	-0.357916	-0.0328116	-0.60963	-0.456278	-0.124245	-0.230547	-0.415463	-0.555549	-0.0694182	-0.196264	-0.43332	-0.0814172	-0.684099	-0.566389	-0.496988	-0.800014	-0.828454	-1.13578	-0.652625	-0.803254	-0.056732	-0.868461	-0.287298	-0.541428	-0.851473	-0.387956	0.0342969	-0.596149	-0.393699	-0.172492	-0.278179	-0.559324	-0.653489	-0.358437	-0.951761	-0.461288	-0.959816	-0.555999	-0.0775985	-0.758532	-0.479288	-0.595925	-0.881903	0.0925803
P00558	PGK1	0.239965	0.276553	0.21109	0.0344182	0.0407774	0.374581	0.405568	-0.0373521	0.35284	-0.22872	0.00784186	0.0165912	0.0858796	0.193591	0.219031	0.000305904	0.313667	0.263685	0.0863389	-0.189842	-0.255697	-0.0184682	0.177597	-0.00272582	-0.00990175	-0.0337589	0.0863112	0.248349	-0.038482	-0.178239	0.177521	0.213111	0.255228	0.221387	0.0637346	0.469846	0.332372	0.242624	-0.119492	0.137126	-0.266078	0.394749	0.111368	-0.0694214	0.290744	0.0677953	-0.0379381	-0.200124
P00568	AK1	-0.299465	-0.332726	-0.213413	-0.599874	-0.32299	-0.0739066	0.0194706	-0.830694	0.0121903	-0.729997	0.145821	-1.28063	-0.156762	-0.186879	-0.0233212	-0.0779924	-0.168865	-0.101568	-0.71902	-0.638113	-0.702086	-0.888855	-0.252289	-0.404297	-0.337338	-0.309669	-0.317792	0.0325271	-0.638371	-0.827247	0.0870142	-0.185015	-0.148888	-0.19132	-0.28438	0.126535	-0.577748	-0.0995282	-0.985651	-0.312524	-0.504654	0.0121202	-0.183257	-0.747998	-0.354724	-0.896319	-0.949539	-0.286386
P00734	F2	-0.793849	-1.11933	0.11528	-1.23613	-1.22137	-0.918346	-1.06203	-1.42292	-0.855726	-1.36004	-0.940765	-1.2045	-0.998942	-0.64914	-0.892235	-1.23827	-1.26805	-1.26782	-1.48168	-1.23261	-0.763353	-1.1535	-0.80506	-1.0708	-0.604928	-1.10088	-1.11412	-0.884122	-1.03348	-1.07838	-1.33547	-0.973754	-1.09321	-0.766595	-1.01182	-1.38397	-1.08474	-0.905672	-1.2542	-0.420301	-1.14517	-1.08802	-1.0192	-0.947524	-0.750862	-1.46326	-1.56369	-1.15367
P00738	HP	-0.464327	-1.41656	0.2265	-1.00143	-0.860891	-1.28978	-1.61934	-1.72142	-0.886051	-1.80918	-1.6052	-0.81918	-0.688543	-1.71051	-1.43607	-1.29349	-1.11442	-1.51532	-1.36053	-1.01862	-2.05611	-0.0431646	-1.21901	-1.26721	-0.999365	-1.63415	-1.70069	-0.552629	-1.02491	-1.8043	-0.935771	-1.94453	-0.628589	-0.565866	-1.6573	-2.0304	-1.49685	-0.610811	-1.47262	-0.91105	-1.0041	-1.10213	-1.00232	-0.522394	0.173166	-1.35895	-1.77514	-1.29378
P00747	PLG	-0.862969	-0.976161	-0.45133	-1.11167	-1.00512	-1.18774	-1.01471	-0.969668	-0.792489	-0.687715	-0.824317	-0.998946	-1.15599	-1.14891	-1.08818	-0.901084	-0.680912	-0.784903	-0.848414	-1.17578	-0.585314	-0.578381	-0.831385	-0.829289	-0.697793	-1.12114	-0.975068	-0.932018	-0.538804	-1.19874	-1.27303	-1.54028	-1.14309	-0.927746	-1.08131	-1.70307	-1.02223	-1.05057	-1.11433	-0.262528	-1.52994	-1.6274	-1.28868	-1.31636	-0.631863	-1.26108	-0.979537	-1.01337
P00748	F12	-0.071341	-0.0714452	-0.0705412	-0.0720964	-0.0721662	-0.0722391	-0.0722065	-0.0726154	-0.0718019	-0.0710434	-0.072789	-0.0713537	-0.0705533	-0.0704325	-0.0710548	-0.0713588	-0.0713768	-0.0722234	-0.0711924	-0.0705648	-0.0705155	-0.0709777	-0.0720632	-0.072483	-0.0735226	-0.0722858	-1.51334	-1.56573	-0.838823	-0.0712652	-0.0701293	-0.0708997	-0.0700396	-0.0667255	-0.0654228	-0.0757322	-0.0653662	-0.0710484	-0.072427	-0.0696482	-0.0732392	-0.0716616	-0.0720372	-0.0713852	-0.0714106	-0.0723681	-0.0719338	-0.070381
P00751	CFB	-0.90049	-0.990685	0.136485	-0.877218	-0.947906	-0.67249	-0.828248	-1.16283	-0.661241	-0.893136	-0.67846	-0.83279	-0.930864	-0.868047	-1.01252	-1.25001	-0.977061	-1.18863	-1.09622	-1.12161	-0.90894	-0.39919	-0.771892	-1.0879	-0.257959	-1.04447	-1.0753	-0.739724	-0.702561	-1.02474	-0.897639	-0.7824	-0.716355	-0.686472	-0.818309	-1.46436	-0.756131	-0.828133	-1.18168	-0.412089	-1.00901	-0.99057	-0.950577	-1.10664	-0.559563	-0.839229	-0.807141	-1.03309
P00813	ADA	-0.204993	-0.116539	-0.214376	-0.345363	0.586954	-0.0902468	-0.0750815	0.0765972	0.0640406	-0.00881109	0.00798149	0.0759168	0.609328	-0.148133	0.052241	0.403554	0.10564	0.0857982	-0.0793559	0.498859	0.135673	0.238545	-0.359584	-0.0549658	0.231258	0.106685	-0.115814	-0.363039	1.26773	0.143959	-0.0525844	0.295151	0.194536	0.140517	0.200632	0.272767	0.461366	-0.616087	0.0877007	0.277114	-0.150585	0.129445	0.187953	-0.109563	0.0168489	-0.0141218	0.0278245	0.322692
P00846	MT-ATP6	-0.36383	-0.0461281	0.707834	0.146786	-0.368131	0.237867	-0.496851	0.403133	-0.0718019	-0.0710434	-0.072789	-0.0713537	-0.0898549	-0.028826	-0.0881352	0.0933011	0.197507	0.193572	0.143718	0.0790742	0.28867	0.103021	-0.222147	0.0881812	0.726357	-0.0576377	0.389394	0.146133	0.412895	-0.0252687	-0.0275667	-0.00894954	-0.341441	0.0225931	-0.0505549	0.131832	0.131624	-0.110117	0.328283	-0.631887	0.505412	0.902572	0.690309	0.145834	0.143755	0.448794	0.406489	0.963533
P00915	CA1	-1.05368	-0.810875	-1.08715	-0.979856	-1.15281	-1.379	-1.43819	0.447325	-0.739169	-1.31397	-1.19464	-1.2268	-1.07185	-1.26726	-1.51129	-1.80461	-1.60155	-1.53697	-1.39915	-1.3737	-2.08047	-1.41812	-0.751229	0.195268	-1.1457	-0.899111	-1.151	-1.92401	-1.73776	-0.845829	-1.08929	-0.995876	-0.282499	-1.34022	-1.02873	-0.725209	-0.51593	-0.83416	-1.30381	-1.41852	-0.0551418	-1.24467	-1.11137	-1.42378	-1.75182	-1.15145	-1.68494	-0.181675
P00918	CA2	-2.02496	-1.72145	-1.90763	-1.89214	-1.81784	-1.73544	-1.96467	-0.72738	-1.67483	-2.05087	-1.83944	-1.23917	-1.66572	-2.17458	-1.86565	-1.46611	-2.08109	-2.0142	-1.65153	-2.05652	-2.31382	-2.15722	-2.18387	-1.32689	-1.92948	-1.83195	-2.23209	-2.46364	-2.18179	-1.66648	-1.88977	-1.44508	-1.43835	-1.56597	-1.74876	0.733317	-1.36863	-1.60694	-1.76972	-2.30332	-1.62766	-1.99152	-2.04652	-2.47148	-2.10752	-1.84955	-1.98393	-1.42529
P00966	ASS1	-0.00188996	-0.0490381	-0.0705412	0.136022	0.128141	0.22362	0.37429	-0.0975877	0.0914594	0.07229	0.0753571	0.00349613	-0.631763	-0.868595	-0.827628	-0.404897	-0.27134	-0.373506	-0.238428	-0.701132	-0.59476	-0.584349	-0.870679	-0.271029	-0.49683	0.0189472	-0.376737	-0.175502	-0.140185	-0.262104	-0.0002854	-0.689341	-0.94086	-0.196593	-0.29697	-0.128278	0.121642	-0.209277	-0.180004	-1.11359	-0.463011	0.232228	-0.812622	-0.277298	-0.513943	-0.216095	-0.0492538	-0.122086
P00973	OAS1	-0.071341	-0.0714452	-0.0705412	-0.0720964	-0.0721662	-0.0722391	-0.0722065	-0.0726154	-0.0718019	-0.0710434	-0.072789	-0.0713537	-0.0705533	-0.0704325	-0.0710548	-0.0713588	-0.0713768	-0.0722234	-0.0711924	-0.0705648	-0.0705155	-0.0709777	-0.0720632	-0.072483	-0.0735226	-0.0722858	-0.370131	-0.192874	0.96388	-0.0712652	-0.0701293	-0.0708997	-0.0700396	-0.0667255	-0.0654228	-0.0757322	-0.0653662	-0.0710484	-0.072427	-0.0696482	-0.0732392	-0.0716616	-0.0720372	-0.0713852	-0.0714106	-0.0723681	-0.0719338	-0.070381
P01008	SERPINC1	-1.89022	-1.97794	-0.308782	-1.51206	-2.00626	-1.26191	-1.30084	-2.08029	-1.4728	-2.01615	-1.48149	-2.17687	-1.90631	-1.72938	-1.59346	-1.52845	-1.83117	-1.33076	-1.47009	-1.58001	-2.37352	-2.56329	-1.87478	-1.61582	-1.55473	-1.3887	-1.3379	-1.63256	-1.16254	-1.47103	-1.92616	-1.61369	-1.52332	-1.47993	-1.57964	-1.33971	-1.65155	-1.5236	-1.43279	-1.53311	-1.35671	-1.48652	-1.67015	-2.32889	-2.19959	-2.24528	-2.41631	-1.52613
P01009	SERPINA1	-1.38176	-1.65775	0.155052	-1.48536	-1.68388	-1.24494	-1.451	-1.62183	-1.92518	-1.73295	-1.40311	-1.07954	-1.73533	-1.69129	-1.5648	-1.76152	-2.34213	-1.57525	-1.581	-1.93196	-0.95647	-0.701981	-1.68872	-1.63463	-0.38405	-1.17017	-1.27692	-1.21704	-0.824759	-1.29973	-1.87313	-0.987894	-1.30945	-1.40049	-1.6573	-1.72984	-1.40095	-1.54133	-1.71747	-1.02815	-1.19022	-1.55708	-1.50544	-1.72781	-1.28634	-1.38018	-1.84936	-1.44939
P01011	SERPINA3	-1.6107	-1.54953	0.249979	-1.27246	-2.0787	-1.52229	-1.12044	-1.35265	-1.57633	-1.41985	-1.69674	-2.33671	-1.73533	-1.56627	-1.65171	-0.989326	-1.68325	-0.768931	-0.80661	-0.992591	-1.63038	-1.16347	-1.52915	-1.59184	-0.731561	-0.574139	-1.42784	-1.44252	-1.04271	-1.70693	-1.84571	-1.75226	-1.57093	-1.60155	-1.72984	-1.29352	-1.84117	-1.50563	-1.24174	-1.6757	-1.5675	-2.78502	-1.64302	-1.79788	-1.57927	-2.09479	-2.21524	-0.850446
P01019	AGT	-1.26672	-1.11933	-0.220652	-1.27246	-1.12947	-0.804552	-0.898048	-1.13803	-1.14385	-0.921849	-1.05595	-0.959839	-1.24626	-0.894157	-1.21408	-1.19507	-1.10469	-1.19735	-1.25046	-1.26183	-0.581462	-0.760537	-1.01902	-1.1928	-0.083486	-0.868461	-1.01438	-0.910935	0.52041	-0.712693	-1.56538	-0.559646	-1.0101	-1.17576	-1.24364	-1.27443	-0.816017	-1.03572	-1.01325	-0.873874	-1.05133	-1.15013	-0.919524	-1.20406	-1.33293	-1.1043	-1.47154	-1.14185
P01023	A2M	-1.216	-0.995347	-0.378085	-1.0126	-1.06291	-1.40122	-1.14696	-0.462837	-0.721284	-0.889373	-1.0062	-1.32866	-1.02814	-1.37632	-0.939087	-1.48529	-0.938124	-1.20868	-1.17431	-1.14072	-1.56569	-1.03777	-1.34111	-1.24767	-0.937621	-0.852061	-1.00115	-1.10927	-1.36738	-1.14309	-1.02854	-1.16222	-0.703058	-1.17056	-0.601108	-1.43951	-0.800866	-1.08426	-0.432099	-1.44474	-0.753582	-0.7682	-0.688753	-1.12712	-0.423768	-1.02123	-1.27109	-1.12181
P01024	C3	-1.20217	-1.32515	-0.720167	-1.18661	-1.27407	-1.00153	-1.25321	-1.41477	-1.24574	-0.931583	-1.26276	-0.663283	-1.21837	-1.02837	-1.07908	-1.28804	-1.24369	-1.36616	-1.5026	-1.30511	-1.02774	-0.67904	-1.18855	-1.38916	-0.631912	-1.44625	-1.54744	-1.07931	-1.10242	-1.49568	-1.42484	-0.953188	-0.962619	-0.891193	-1.42342	-2.05137	-1.23856	-0.961244	-1.34098	-0.482577	-1.4607	-1.18684	-1.23167	-1.21273	-0.609934	-1.1966	-1.23362	-1.35168
P01031	C5	-1.15339	-1.17604	-0.803961	-1.03515	-0.97234	-0.945244	-1.05649	-0.792259	-1.22014	-0.790655	-1.06942	-0.483222	-1.21837	-0.927409	-1.02375	-1.19507	-1.16808	-1.22029	-1.27179	-1.29293	-1.08915	0.0512382	-1.0592	-1.03738	-0.47542	-1.18634	-1.30929	-1.1486	-1.11369	-1.11069	-1.23622	-0.981502	-1.12345	-1.21198	-1.2085	-1.61292	-1.17619	-1.21491	-1.20137	-0.657037	-0.959816	-1.16664	-0.926724	-1.27793	-0.845842	-0.804041	-1.12098	-1.11272
P01034	CST3	-0.822881	-0.927888	-0.557655	-0.796747	-1.13233	-1.04139	-1.08302	-0.998603	-1.20733	-0.157028	-1.08493	0.305115	-1.1402	-1.14725	-1.14621	-1.12743	-0.979491	-1.06552	-1.07759	-1.55687	-0.976347	-1.14143	-1.19976	-1.06204	-0.632367	-1.02501	-1.15152	-1.05177	-0.751733	-0.875626	-1.3282	-1.4094	-1.18966	-0.927824	-0.924381	-1.13418	-1.08563	-1.70355	-1.09491	-0.674527	-0.97354	-1.0621	-0.976776	-0.876223	-0.943451	-0.747948	-0.706295	-0.833424
P01042	KNG1	-0.999141	-1.05455	-0.0143809	-0.97284	-1.71969	-1.54697	-1.80986	-2.22252	-1.14905	-1.23007	-1.04773	-1.31079	-1.28624	-1.17566	-1.28759	-1.38699	-1.16808	-1.18863	-1.30926	-1.95845	-1.18058	-1.33139	-1.37895	-1.51713	-0.702662	-1.3968	-1.48832	-1.49587	-0.856243	-1.18966	-1.25787	-1.49469	-1.21631	-0.882705	-0.99652	-1.79817	-1.52396	-1.20623	-1.42059	-0.665967	-1.50606	-1.29612	-1.48744	-1.29678	-1.14805	-1.32977	-1.48516	-0.994845
P01111	NRAS	0.000375182	-0.108212	-0.0377661	-0.169348	-0.267165	-0.0844209	-0.266662	0.064126	0.0690725	-0.0468714	-0.00861467	0.262755	-0.146328	0.364035	0.131827	-0.0597872	0.197466	-0.0687427	0.0221851	0.0645404	0.0282492	0.117159	0.120335	-0.262598	0.130694	-0.000843394	-0.0954767	-0.0868539	0.0112838	-0.0279362	-0.00125912	0.186807	-0.0209187	-0.0734191	-0.363879	0.16348	0.0883532	0.0488305	-0.0997445	-0.143021	-0.243305	-0.0796516	-0.0994174	-0.157453	-0.0134608	0.0315415	0.154652	-0.142707
P01591	JCHAIN	-0.071341	-0.0714452	-0.0705412	-0.0720964	0.603856	0.858536	0.925509	-0.11267	-0.18371	0.0597542	-0.188453	-0.28424	-0.609865	-0.622079	-0.57071	-0.59011	-1.12185	-0.544218	-0.745484	-1.14582	-1.34574	-1.18165	-0.782965	-0.257429	-0.226597	-0.360002	-0.355645	-0.327513	-0.225851	-1.36555	-1.20629	-1.38037	-0.806285	-0.444045	-0.853492	-0.110887	-0.601127	-0.130343	-0.178964	-0.834936	-1.0302	-0.845096	-0.503097	-0.547643	0.53497	-1.23979	-1.35873	-0.070381
P01619	IGKV3-20	-1.43349	-1.62266	-0.185932	-1.53906	-1.77249	-1.32567	-1.4496	-1.88294	-1.59019	-1.48701	-1.47759	-1.44018	-1.77233	-1.55772	-1.67596	-2.0815	-1.28139	-1.76092	-1.84616	-1.85654	-1.36294	-1.51581	-2.1267	-1.3466	-0.792574	-1.64799	-1.63856	-1.43533	0.253561	-1.41439	-1.78712	-1.36812	-1.73379	-2.17937	-2.49697	-1.57964	-1.86761	-1.76913	-1.69758	-1.78627	-1.60139	-1.60117	-1.65706	-1.7819	-1.39338	-1.38018	-1.88134	-1.51005
P01742	IGHV1-69	-0.071341	-0.0714452	-0.0705412	-0.0720964	-0.0721662	-0.0722391	-0.0722065	-0.0726154	-0.0718019	-0.0710434	-0.072789	-0.0713537	-0.0705533	-0.0704325	-0.0710548	-0.0713588	-0.0713768	-0.0722234	-0.0711924	-0.0705648	-0.0705155	-0.0709777	-0.0720632	-0.072483	-0.0735226	-0.0722858	-0.493697	-0.69218	0.751262	-0.0712652	-0.0701293	-0.0708997	-0.0700396	-0.0667255	-0.0654228	-0.0757322	-0.0653662	-0.0710484	-0.072427	-0.0696482	-0.0732392	-0.0716616	-0.0720372	-0.0713852	-0.0714106	-0.0723681	-0.0719338	-0.070381
P01859	IGHG2	-1.83775	-1.83845	0.0697544	-1.87239	-1.76274	-2.22213	-2.00568	-2.30856	-1.6052	-0.946521	-1.4728	-1.94494	-2.05221	-1.60524	-1.82031	-2.46565	-1.2062	-1.923	-2.1306	-2.20885	-1.6565	-1.5575	-1.64719	-2.18478	-1.38769	-1.86048	-1.80382	-1.92401	-1.60383	-1.43835	-2.02109	-1.60157	-1.89078	-2.32449	-1.81962	-1.84043	-1.54672	-1.69051	-2.0523	-1.10294	-1.47777	-1.53488	-1.76539	-2.00588	-0.873629	-1.77538	-1.66215	-1.75246
P01860	IGHG3	-1.09135	-1.38793	0.00231855	-1.46657	-1.41314	-1.60183	-1.31823	-2.1933	-1.29683	-1.15419	-1.30035	-1.32146	-1.44106	-1.50399	-1.44709	-1.54728	-1.0952	-1.40199	-1.24453	-2.08088	-1.79567	-2.28788	-1.29871	-1.83235	-1.89185	-1.84698	-2.05017	-1.46594	-0.486583	-1.37319	-1.75911	-1.69225	-1.23458	-1.63751	-1.5099	-1.66363	-1.46872	-1.25685	-1.50632	-0.127613	-1.20018	-1.13234	-1.21593	-1.53515	-0.780964	-1.80159	-1.64699	-1.43531
P01861	IGHG4	-1.7522	-1.88084	0.203917	-1.77014	-1.53507	-2.78696	-2.49097	-3.10569	-1.70403	-1.50997	-1.94494	-2.2202	-1.97536	-1.43003	-1.92255	-2.80365	-2.52185	-3.10569	-3.10569	-1.84524	-1.81743	-2.13019	-2.59399	-2.38885	-2.38798	-2.03966	-1.68095	-1.74538	-1.60285	-2.30523	-1.71904	-1.15178	-1.76015	-2.92129	-1.04741	-1.97128	-2.33896	-2.72719	-2.47932	-2.20048	-2.4083	-2.63868	-1.97881	-2.24637	-1.03647	-1.69257	-1.81753	-1.87078
P01871	IGHM	-1.03747	-0.961717	-0.722086	-0.801424	-0.831555	-1.02793	-1.04983	-0.310408	-0.877714	-0.660983	-0.935688	-0.614408	-0.830498	-0.755408	-0.751938	-0.929926	-0.914039	-0.843452	-0.744063	-1.08508	-1.31399	-0.0629978	-0.913507	-0.801624	-0.60845	-0.805886	-1.02683	-1.03107	-0.76	-1.34084	-1.41331	-1.07729	-0.851266	-1.44764	-1.2085	-0.324747	-1.21537	-0.938007	-1.04877	-1.14596	-0.148348	-0.635468	-0.840561	-1.22804	1.64008	-0.961532	-0.802228	-0.766554
P01876	IGHA1	-1.49867	-1.73742	-0.340457	-1.59921	-1.5622	-1.77843	-1.42947	-2.10552	-1.23917	-1.26921	-1.32512	-1.92518	-1.6783	-1.8217	-1.97403	-2.13019	-1.00925	-1.54656	-1.96807	-1.84524	-1.35619	-1.74813	-1.56485	-2.02932	-0.999365	-1.95834	-1.85554	-1.77494	-1.77474	-1.64648	-1.17264	-1.47007	-1.43031	-1.99089	-1.16024	-2.31079	-1.82033	-0.969329	-1.23075	-0.603311	-1.10476	-1.85114	-1.84634	-1.89365	-1.32533	-0.792277	-1.77514	-1.37691
P01889	HLA-B	-0.242565	-0.117181	-0.162281	-0.0990254	-0.488594	-0.514053	-0.479524	0.47613	-0.684487	-0.438304	-0.492466	-0.160053	-0.605024	-0.913526	-0.820819	-1.50214	-1.12185	-1.31763	0.730181	-1.00018	-0.652516	-0.14155	-1.58474	-1.21414	-0.804835	-0.673478	-0.69658	-0.898909	0.359445	-0.238063	-0.246157	-0.31265	-0.383741	-0.0667255	-0.0654228	-0.0757322	-0.0653662	-0.441442	-0.325063	-0.701334	-0.15182	-0.0140811	-1.3508	-0.415484	-0.564037	0.768836	0.234672	-0.0149614
P01903	HLA-DRA	-0.490709	-0.582405	-1.12965	-0.245953	0.0478271	-0.334018	-0.0875024	1.05032	-0.554766	0.132804	-0.586571	1.23365	-0.464791	-0.466522	-0.499774	-0.201002	-0.460471	0.251912	0.295724	0.269854	0.546143	1.1605	-0.301456	-1.02805	-0.537919	0.0778643	-0.206451	-0.486725	0.590153	-0.0193156	-0.677264	0.0522268	-0.417617	-0.867525	-0.502651	0.104575	-0.573083	-0.641074	0.262649	-0.570711	0.352145	-0.782712	-0.606281	0.205266	-0.18621	0.344264	0.729171	0.146427
P01911	HLA-DRB1	-0.744513	-0.707144	-1.02257	0.190574	-0.764967	-0.33082	0.435838	1.43252	-0.498439	-0.464139	-0.621834	-0.0390083	-1.08976	-1.12581	-1.41342	-1.20402	-1.16102	-1.50148	0.524256	-1.15287	-0.924109	1.29225	-0.473722	-0.670076	-0.30068	-0.478834	-0.965551	-0.841822	-0.929744	-0.609314	-0.769004	-0.711594	-0.867229	-0.484255	-0.420436	-0.486929	-0.577869	-0.615205	-0.652721	-0.223101	0.00887438	-0.541277	-0.764136	-0.36046	-0.170683	-0.105127	-0.0132024	0.586309
P01920	HLA-DQB1	-0.40971	-0.394519	-0.210039	-0.408106	-0.354779	-0.486402	-0.40468	-0.345631	-0.45506	-0.276856	-0.447271	0.0192829	-0.266284	-0.337981	-0.389406	-0.180131	-0.12211	-0.12978	-0.156982	-0.441155	-0.357176	-0.0120345	-0.412522	-0.244775	-0.159826	-0.2338	-0.305714	-0.378197	0.0121838	-0.606854	-0.687183	-0.205161	-0.539883	-0.188858	-0.220532	0.00987901	-0.109648	-0.249849	-0.255689	0.0618582	0.418701	-0.30642	-0.441279	0.301861	0.152577	0.00673168	-0.0596807	-0.114751
P02042	HBD	-1.06272	-0.859262	-1.05503	-1.20752	-1.10764	-1.07949	-1.155	0.171133	-0.653559	-1.74653	-0.981513	-1.59359	-0.902496	-1.55271	-1.35757	-1.46611	-1.57545	-1.31763	-1.08382	-1.74749	-2.48139	-1.8884	-0.854865	0.362629	-1.53359	-0.975581	-0.798006	-1.74984	-2.08407	-0.840753	-0.879489	-1.35147	-0.0109669	-1.10173	-0.887498	-0.875331	-0.469621	-0.803209	-1.24174	-1.65429	-0.258262	-0.977388	-0.876597	-1.30341	-1.56842	-1.14015	-1.45798	-0.0676614
P02452	COL1A1	-0.071341	-0.0714452	-0.0705412	-0.0720964	-0.0721662	-0.0722391	-0.0722065	-0.0726154	-0.0718019	-0.0710434	-0.072789	-0.0713537	-0.0705533	-0.0704325	-0.0710548	-0.0713588	-0.0713768	-0.0722234	-0.0711924	-0.0705648	-0.0705155	-0.0709777	-0.666505	-0.841632	-0.753639	-0.805734	-0.0666033	-0.0683238	-0.0740938	-0.0712652	-0.0701293	-0.0708997	-0.0700396	-0.0667255	-0.0654228	-0.0757322	-0.0653662	-0.0710484	-0.072427	-0.0696482	-0.0732392	-0.0716616	-0.0720372	-0.0713852	-0.0714106	-0.0723681	-0.0719338	-0.070381
P02462	COL4A1	-0.071341	-0.0714452	-0.0705412	-0.0720964	-0.0721662	-0.0722391	-0.0722065	-0.0726154	-0.0718019	-0.0710434	-0.072789	-0.0713537	-0.0705533	-0.0704325	-0.0710548	-0.0713588	-0.0713768	-0.0722234	-0.0711924	-0.0705648	-0.0705155	-0.0709777	-0.0720632	-0.072483	-0.0735226	-0.0722858	-0.0666033	-0.0683238	-0.0740938	-0.0712652	-0.0701293	-0.0708997	-0.0700396	-0.0667255	-0.0654228	-0.0757322	-0.0653662	-0.0710484	-0.072427	-0.0696482	-0.0732392	-0.0716616	-0.0720372	0.0711161	-0.0714106	-0.0723681	-0.0719338	-0.070381
P02511	CRYAB	-0.885756	-0.348505	-1.19401	-0.626052	0.407109	-0.419642	-0.24661	0.627894	-0.768077	-0.645995	-0.691612	0.494854	-0.915116	-0.106019	-0.208228	-0.904756	-0.314796	-0.291342	-0.194599	0.417044	0.0499391	0.260882	-0.325934	-0.63509	-0.95774	0.0728447	-1.15851	-0.0556189	-1.3487	-0.517461	-0.776592	-0.162561	-0.776292	-1.40049	-1.04022	-0.0349874	-0.89727	-1.12373	-0.659862	-0.67074	-0.596273	-0.638514	-1.07855	0.0949825	-0.226414	-0.270662	-0.00474586	-0.909608
P02533	KRT14	0.167693	-0.423417	-0.450197	-0.429813	0.228411	-0.686614	-0.337544	-0.395986	-0.280082	-0.538612	-0.373421	-0.200778	-0.850716	-1.27165	-1.03951	0.400164	-0.189168	0.097523	0.0454708	-0.424628	0.45469	0.730013	-0.550065	-0.151375	-0.106079	-0.447064	-0.770801	-0.349673	-0.61765	-0.233086	-0.377973	-0.148542	-0.26935	-0.365359	-0.335574	0.144321	0.0471875	-0.399847	-0.0518123	0.0913542	-0.00633525	-0.19246	-0.303858	-0.812302	-0.450671	0.302432	-0.269298	-0.386357
P02545	LMNA	0.643837	0.949143	0.199833	1.05585	1.23408	0.354067	0.583962	0.380774	0.571274	0.339884	0.790489	0.409363	0.386571	1.05279	0.907261	0.753321	0.708278	0.540261	1.02269	0.236555	0.585207	0.633939	0.976388	1.10467	-0.484855	0.4607	0.802247	0.7741	0.718158	0.654093	0.459921	0.963586	0.615487	0.347778	0.570351	-0.351598	1.19978	0.530777	0.542987	0.336946	-0.0281968	0.245217	0.402938	0.813581	0.374459	0.272248	0.818846	0.434542
P02549	SPTA1	-1.1688	-0.805217	-0.809526	-0.929446	-0.902587	-1.29585	-1.26657	-0.530042	-0.247767	-1.48128	-0.513639	-0.603802	-0.947563	-1.01906	-1.23906	-1.21235	-1.14362	-0.984323	-1.03581	-1.17063	-1.70875	-0.875213	-0.666505	0.180068	-0.594195	-0.852061	-0.739932	-1.42762	-1.49568	-0.780556	-1.08929	-0.912508	-0.427107	-0.817218	-0.826169	-0.933375	-0.198333	-0.661118	-1.00612	-1.13037	-0.188902	-0.804157	0.376024	-0.731294	-1.24586	-0.811038	-0.896034	-0.144613
P02647	APOA1	-1.19125	-1.43583	-1.93004	-1.57381	-1.34677	-1.24494	-1.16085	-2.47277	-1.57633	-1.98466	-1.17985	-2.37161	-1.50377	-1.22135	-1.48999	-1.44158	-1.46178	-1.29293	-2.09333	-1.58001	-0.817642	-0.815543	-1.80267	-1.57555	-1.28954	-1.70303	-1.95786	-1.27667	-1.46919	-1.23458	-1.84571	-1.39287	-1.38165	-1.46473	-1.54575	-2.3384	-1.54672	-0.989241	-1.54194	-0.515181	-1.90108	-1.72152	-1.11909	-1.58506	-0.944913	-2.52448	-2.0292	-1.90069
P02649	APOE	-1.17839	-0.971446	-1.20813	-1.4565	-1.37316	-1.76383	-1.09344	-1.56372	-1.30737	-1.21674	-0.964215	-1.25263	-1.15599	-1.49538	-0.872677	-1.45348	-0.919283	-1.49302	-1.44976	-1.394	-1.29824	-0.321152	-1.23747	-1.3573	-0.67718	-1.59137	-1.28677	-1.21704	-1.29159	-1.59729	-1.52643	-1.08693	-1.10113	-0.94902	-0.980602	-1.19704	-0.919477	-1.2939	-1.15879	-1.5873	-1.77223	-1.42905	-1.3677	-1.41217	-1.11473	-1.51069	-1.22293	-1.26699
P02652	APOA2	-2.2219	-1.56703	-1.59969	-2.08157	-2.1177	-2.03018	-1.77661	-2.90715	-1.66084	-2.16158	-1.56111	-2.41116	-1.85448	-2.22537	-1.84711	-1.95033	-1.84543	-1.97633	-2.37446	-2.12957	-2.18321	-2.37419	-2.23899	-1.59184	-0.370649	-2.07604	-2.13078	-1.38278	-1.72555	-1.90848	-2.11429	-2.15592	-2.11527	-1.29672	-2.15159	-2.51868	-2.40616	-1.59069	-1.90038	-2.07179	-2.24547	-2.25826	-1.32051	-2.30151	-1.59145	-2.09479	-1.80132	-2.00046
P02654	APOC1	-1.34683	-1.29425	-2.17032	-1.5627	-1.17812	-1.69214	-0.956068	-1.96666	-1.31773	-1.33108	-1.21381	-1.2942	-1.55721	-1.55271	-1.60939	-1.13578	-1.49321	-1.09213	-1.1228	-1.4251	-1.21411	-1.09837	-1.78608	-1.37163	-1.59041	-1.51192	-1.63856	-1.40561	-1.38254	-0.996924	-1.81749	-1.19745	-1.47103	-1.73025	-1.86685	-2.20463	-1.71726	-1.22677	-1.26316	-0.922796	-1.62022	-1.55023	-1.52786	-1.64619	-1.19455	-1.58354	-1.44141	-1.49893
P02656	APOC3	-1.1688	-0.798569	-1.30476	-1.18661	-0.0721662	-0.0722391	-0.0722065	-0.0726154	-0.0718019	-0.0710434	-0.072789	-0.0713537	-0.0705533	-0.0704325	-0.0710548	-0.0713588	-0.0713768	-0.0722234	-0.0711924	-0.0705648	-0.0705155	-0.0709777	-0.0720632	-0.072483	-0.0735226	-0.0722858	-0.0666033	-0.0683238	-0.0740938	-0.0712652	-0.0701293	-0.0708997	-0.0700396	-0.0667255	-0.0654228	-0.0757322	-0.0653662	-0.0710484	-0.072427	-0.0696482	-0.0732392	-0.0716616	-0.0720372	-0.0713852	-0.0714106	-0.0723681	-0.0719338	-1.39679
P02671	FGA	-0.672709	-0.613157	-0.340457	-0.525401	-0.561262	-1.20389	-1.02494	-0.949655	-1.0506	-0.332324	-1.01917	-0.909285	-0.599944	-0.946105	-0.980463	-1.05253	-1.32452	-1.10233	-0.912652	-0.869664	-0.988185	-0.611526	-1.15915	-0.756437	-1.19132	-1.02986	-1.03613	-0.751891	-0.745945	-0.672821	-0.700784	-0.454167	-0.260202	-0.817218	-0.899726	-1.561	-0.877778	-0.237241	-1.0562	-0.268408	-0.512114	-0.830049	-0.807826	-0.819025	0.828709	-0.94565	-0.828852	-0.615957
P02675	FGB	-0.73375	-0.751356	-0.397387	-0.573722	-0.404145	-1.14351	-1.04833	-0.70034	-0.806936	-0.0114378	-0.799268	-0.437092	-0.476138	-0.803369	-0.81321	-1.08574	-1.2062	-0.990644	-0.946317	-0.747019	-0.65543	-0.246548	-1.07451	-0.728866	-1.26578	-0.96709	-0.9956	-0.77061	-0.502524	-0.576988	-0.728548	-0.269868	-0.201848	-0.716319	-0.656786	-1.06969	-0.700111	-0.234642	-0.765925	-0.0150337	-0.216324	-0.721077	-0.598203	-0.641181	0.879018	-0.854704	-0.923716	-0.736753
P02679	FGG	-0.689734	-0.691916	-0.276667	-0.480373	-0.625691	-1.11698	-0.905853	-1.06486	-0.721284	-0.327126	-0.799268	-0.719923	-0.619833	-1.10229	-1.12152	-1.07636	-1.38221	-1.08262	-0.932984	-0.962853	-1.21411	-0.591766	-1.20981	-0.923196	-1.25298	-1.13835	-0.882605	-0.68695	-0.598974	-0.665436	-0.885154	-0.336138	-0.242247	-0.611659	-0.635025	-1.07668	-0.776981	-0.348924	-1.10009	-0.149221	-0.526309	-0.870154	-0.56993	-0.842329	0.764787	-1.23051	-1.15736	-0.627385
P02686	MBP	-0.071341	-0.0714452	-0.0705412	-0.0720964	-0.0721662	-0.0722391	-0.0722065	-0.0726154	-0.0718019	-0.0710434	-0.072789	-0.0713537	-0.0705533	-0.0704325	-0.0710548	-0.0713588	-0.0713768	-0.0722234	-0.0711924	-0.0705648	-0.0705155	-0.0709777	-0.0720632	-0.072483	-0.0735226	-0.0722858	-0.0666033	-0.0683238	-0.0740938	-0.0712652	-0.0701293	-0.0708997	-0.0700396	-0.0667255	-0.0654228	-0.0757322	-0.0653662	-0.0710484	-0.072427	-0.0696482	-0.0732392	-0.0716616	-1.246	-0.0713852	-0.0714106	-0.0723681	-0.0719338	-0.070381
P02730	SLC4A1	-0.769835	-0.664491	-0.738681	-0.754149	-0.937897	-1.05862	-1.0751	0.416421	-0.777753	-0.921849	-0.985994	-1.01679	-1.14648	-1.30928	-1.55578	-1.50214	-1.42143	-1.2463	-1.15682	-1.23771	-1.74085	-0.915924	-0.73178	0.369849	-0.507799	-0.875366	-0.95431	-1.6097	-1.59381	-0.564547	-0.891887	-0.658461	-0.37422	-1.02172	-0.968819	-0.613047	-0.163468	-0.691999	-0.9957	-1.4587	-0.0827359	-0.973025	-0.992157	-0.986532	-1.35829	-0.818421	-1.04279	-0.194697
P02743	APCS	-1.47369	-1.47927	-1.66814	-1.62762	-1.57743	-2.41283	-2.19148	-2.0076	-1.90502	-1.38063	-1.91503	-0.651443	-1.58424	-1.04604	-1.5736	-1.44158	-1.53719	-1.42929	-1.5164	-1.90478	-1.91338	-0.738324	-1.77743	-1.55506	-1.14695	-1.75042	-1.81148	-1.70588	-1.35383	-1.58684	-1.60012	-1.48303	-1.58749	-1.55566	-1.61293	-0.663822	-1.56172	-1.66637	-1.75227	-0.720783	-1.64146	-1.772	-1.99411	-1.84721	-0.819376	-1.31107	-1.43489	-1.68899
P02746	C1QB	-0.259571	-0.0699425	-0.214194	-0.33488	-0.0378402	-0.300916	-0.108769	-0.24618	-0.0718019	-0.0710434	-0.072789	-0.0713537	-0.688543	-0.786196	-0.685223	-0.662247	-0.758681	-0.294571	-0.06477	-0.0991757	-0.575046	0.474414	-0.348851	-0.379009	-0.519055	-0.305135	-0.449579	-0.316121	0.0564639	-0.243108	-0.328246	-0.225474	-0.405023	-0.0667255	-0.0654228	-0.0757322	-0.0653662	0.00263977	-0.122543	-0.809088	-0.531229	-0.427419	-0.163768	-0.0086103	0.00935001	0.117632	0.258428	-0.419091
P02748	C9	-1.01302	-0.93809	-0.55593	-0.937181	-1.32983	-1.00643	-1.55636	-0.864882	-1.55035	-1.19438	-1.46475	-0.491176	-1.41833	-1.29434	-1.15187	-1.53764	-1.79636	-1.65699	-1.41117	-1.15287	-0.751377	-0.0143945	-1.21901	-1.41405	-0.457786	-1.30617	-1.12117	-0.793281	-1.27325	-1.35263	-1.31475	-0.82275	-0.952312	-1.36125	-1.26509	-1.82624	-1.34073	-1.17056	-1.29171	-1.46763	-1.20942	-1.33174	-1.3677	-1.15439	-1.04221	-1.16882	-1.19992	-1.19153
P02749	APOH	-1.02443	-1.02853	0.164875	-1.13718	-1.57743	-1.03453	-1.52504	-1.25928	-0.90535	-1.15419	-0.897578	-1.31079	-1.54731	-0.927409	-0.992122	-1.58061	-1.43744	-1.35004	-1.30926	-1.20868	-0.892754	-1.12494	-0.919957	-1.25464	-0.760929	-1.4136	-0.969538	-0.810053	-1.38254	-1.39016	-1.22403	-1.5507	-1.05158	-0.713879	-0.66357	-1.44722	-1.1141	-1.46473	-1.34891	-1.51421	-0.95079	-1.28997	-1.08834	-1.38317	-1.12341	-1.08179	-1.37511	-1.06304
P02750	LRG1	-1.38176	-1.20302	-0.370439	-1.1677	-0.901773	-0.772582	-0.758017	-0.967431	-0.308367	0.00242545	-0.20385	-0.0184833	-0.964825	-1.09245	-1.02375	-1.42578	-1.2148	-1.39024	-1.2214	-0.945274	-0.486207	0.0777723	-1.36296	-1.10607	-0.267607	-0.922766	-1.02885	-0.76985	-0.579382	-0.854717	-1.12732	-0.620031	-1.04392	-1.03572	-1.1013	-1.26824	-0.620088	-0.867525	-0.71572	-0.917404	-0.968762	-0.7682	-0.973484	-1.19792	-1.40263	-0.698794	-0.759	-1.61101
P02751	FN1	-0.546644	-0.526672	-0.436303	-0.428207	-0.294839	-0.524288	-0.471117	0.321327	-0.529981	-0.413124	-0.566996	0.152356	-0.387497	-0.776425	-0.677905	-0.558623	-0.66497	-0.143367	-0.420518	-0.45336	-0.415875	-0.915924	-0.344468	-0.353028	-0.428334	-0.0993363	-0.624728	-0.624572	-0.185305	-0.10986	-0.658461	-0.337899	0.0605887	-0.601531	0.335812	-0.669409	-0.452454	-0.475442	-0.692639	-0.0934574	0.182788	-0.485775	-0.306693	-0.259561	0.136347	-0.327252	-0.460034	-0.330453
P02753	RBP4	-0.40388	-0.785409	-0.17631	-0.686471	-1.3613	-0.939157	-1.27328	-1.17131	-0.961097	-1.06891	-1.0614	-1.01071	-1.26401	-1.23033	-1.37843	-0.890461	-0.842295	-0.814759	-0.860419	-1.4251	-1.00185	-1.5711	-1.43761	-1.28475	-0.968313	-1.06549	-1.17265	-1.07066	-1.23868	-0.993122	-0.975729	-0.676124	-0.783635	-0.915136	-1.35143	-1.28179	-1.25048	-0.947177	-1.21268	-1.12483	-1.24814	-1.3171	-1.17004	-1.14693	-1.31764	-1.01618	-1.02683	-1.07169
P02760	AMBP	-1.03281	-1.08062	-0.430089	-1.04688	-1.18365	-0.884768	-0.890071	-1.33997	-0.901296	-1.1767	-1.23358	-1.14385	-1.42575	-1.0698	-1.22842	-1.31827	-1.51109	-1.29293	-1.34747	-1.29868	-1.0971	-1.07178	-0.979027	-1.03738	-0.310935	-1.20476	-1.55717	-1.39798	-1.62099	-1.57093	-1.251	-1.13289	-1.51426	-0.959134	-1.19704	-1.31531	-1.00139	-0.792914	-1.23075	-0.794415	-0.921824	-1.22899	-1.2824	-1.49422	-1.00438	-1.01035	-1.10406	-1.02479
P02763	ORM1	-1.48339	-1.37752	0.347904	-1.42236	-1.51133	-0.951345	-1.35404	-1.35265	-1.17413	-1.83923	-1.24903	-0.934318	-1.38422	-1.44873	-1.5022	-1.78898	-1.68325	-1.87176	-1.60789	-2.1036	-1.46878	-1.31827	-1.4635	-1.85417	-1.63972	-1.77904	-1.3379	-1.16728	-1.32103	-1.62698	-1.54509	-1.28708	-0.828767	-1.18594	-1.39206	-1.91759	-1.12158	-1.38448	-1.88364	-1.22032	-1.33198	-1.58297	-1.39275	-1.67296	-0.770499	-1.86411	-1.60422	-1.47393
P02765	AHSG	-1.09135	-1.20302	0.122713	-1.35359	-1.43464	-1.07456	-1.37236	-1.8496	-0.990623	-1.55008	-1.24903	-1.0425	-1.26993	-1.18071	-1.25996	-2.00496	-1.52419	-1.85194	-1.83195	-1.74749	-1.27343	-1.83156	-1.31878	-1.64852	-0.63875	-1.66182	-1.58366	-1.53329	-1.44232	-1.32267	-1.6857	-1.33547	-1.45456	-1.25002	-1.43171	-1.87451	-1.66454	-1.42385	-1.60217	-1.00683	-1.08826	-1.26851	-1.53232	-1.30988	-0.918836	-1.28339	-1.29631	-1.32055
P02766	TTR	-1.44913	-1.44991	0.416826	-1.39876	-1.93614	-1.2226	-1.3992	-1.53129	-1.3323	-1.58719	-1.37627	-1.42896	-1.92395	-1.76035	-1.90491	-1.5206	-1.86471	-1.3737	-1.5288	-1.50148	-1.97594	-1.98654	-1.61462	-1.50766	-1.10977	-1.4974	-1.06424	-1.6097	-1.05657	-1.34084	-1.44508	-0.902948	-1.14309	-1.32572	-1.54575	-1.24956	-1.42037	-1.36818	-1.26929	-1.61903	-1.03765	-1.56729	-0.728455	-2.47148	-2.13827	-1.12703	-2.08137	-0.970865
P02768	ALB	-1.72063	-2.41816	-0.0818845	-2.26921	-2.16287	-1.42686	-1.8776	-2.47277	-1.61884	-1.90479	-1.61884	-1.63873	-2.32596	-1.71051	-2.08608	-2.56329	-2.0144	-2.20885	-2.43047	-2.52174	-1.45233	-1.87232	-1.90093	-2.32288	-1.28954	-2.00692	-1.50021	-1.74984	-1.88232	-1.74633	-2.72327	-1.87313	-1.44612	-1.71685	-2.05137	-2.12415	-1.98177	-1.71685	-2.1252	-0.927319	-1.96085	-2.03573	-1.5824	-2.1928	-1.61778	-1.96276	-2.57199	-2.20519
P02774	GC	-1.54865	-1.76109	-0.203391	-1.73858	-1.70533	-1.32739	-1.51065	-2.03058	-1.39427	-1.85417	-1.57108	-1.40311	-1.88978	-1.58446	-1.72775	-1.91443	-1.64378	-1.99524	-1.8727	-2.0142	-1.33781	-1.73582	-1.61462	-1.70353	-0.561442	-1.7439	-1.35552	-1.39059	-0.756667	-1.45456	-1.59049	-1.34363	-1.25229	-1.47206	-1.71643	-1.93581	-1.7991	-1.58004	-1.78371	-0.843158	-1.78822	-1.72152	-1.75163	-1.74074	-1.28634	-1.54683	-1.70757	-1.7131
P02786	TFRC	-0.251037	-0.0724881	0.0397975	-0.408106	-0.482369	-0.25385	-0.75518	-0.24618	-0.152345	-0.226455	-0.0927337	0.807895	-0.564458	0.10666	-0.220771	-0.476446	-0.183481	-0.0931104	-0.152207	0.0169085	0.0954491	-0.108873	-0.259419	-0.0665082	0.331542	0.823803	-0.056303	0.0248914	-0.0200866	-0.201848	-0.15814	0.399788	-0.3223	-0.408246	-0.0616278	-0.511913	0.20521	-0.433507	-0.186426	0.167739	-0.125315	0.192515	-0.342891	-0.473194	-0.0243249	0.298657	-0.0278649	-0.335979
P02787	TF	-1.31625	-1.39736	0.00630948	-1.54433	-1.81784	-1.26191	-1.66135	-1.73589	-1.44612	-1.45987	-1.20733	-1.29683	-1.80159	-1.67853	-1.70197	-2.18407	-1.68325	-1.81124	-1.91485	-1.93196	-1.3898	-1.61967	-1.42922	-1.85417	-1.10465	-1.60864	-1.44634	-1.59402	-1.24699	-1.43031	-1.63824	-1.39287	-1.1132	-1.30946	-1.40406	-1.76875	-1.52396	-1.4163	-1.59138	-0.665967	-1.67052	-1.40753	-1.47898	-1.92134	-1.13231	-1.57996	-1.73764	-1.39679
P02788	LTF	-0.284036	-0.355655	-0.242219	-0.251453	-0.505492	-0.493316	-0.321127	0.0666707	-0.0559306	0.0331923	0.026105	0.322099	-0.436088	-0.619135	-0.557143	-0.325962	0.0176905	-0.18313	-0.266274	-0.520544	-0.425194	-0.221753	-0.455816	-0.150668	-0.643546	-0.307372	-0.526407	-0.555337	0.132521	-0.469149	-0.396297	-0.265088	-0.587463	0.0956996	0.241777	0.196863	0.331166	-0.197026	-0.148816	-0.28565	-0.708149	-0.67288	-0.365712	-0.747998	0.976603	-0.750197	-0.625568	-0.292112
P02790	HPX	-1.27856	-1.31704	-0.199419	-1.32245	-1.61359	-1.18774	-1.53972	-1.52269	-1.11993	-1.23896	-1.16277	-0.917766	-1.56608	-1.38857	-1.39049	-1.7162	-1.42952	-1.62487	-1.74216	-1.56607	-0.952345	-1.05966	-1.51598	-1.70353	-0.555353	-1.53455	-1.53351	-1.22838	-1.23388	-1.42195	-1.49906	-1.24781	-1.06425	-1.38448	-1.56559	-2.15159	-1.3555	-1.44764	-1.52809	-1.19456	-1.49589	-1.53488	-1.53232	-1.56074	-1.07306	-1.29014	-1.56369	-1.46499
P02792	FTL	-0.845804	-0.905794	-0.687387	-0.511423	-0.663255	-0.471976	-0.506979	1.31129	-0.973195	-1.49046	-1.23917	-0.899377	-0.947563	-1.0324	-1.28759	-0.469275	-1.44499	-0.249858	-0.726825	-0.538895	-1.77351	-0.261986	-0.871248	-0.651607	-1.82405	0.564943	-0.302661	-0.87279	-0.582526	-0.83343	-0.321473	-0.189733	-0.601589	-0.791436	-0.592969	1.53456	-0.959633	-0.715065	-0.671144	-1.9901	-0.485372	-1.53488	-1.11137	-1.36311	-1.29939	-0.771196	-1.7226	0.920646
P02794	FTH1	-1.58352	-1.35975	-0.822994	-0.962966	-0.725749	-0.347128	-0.38514	0.977515	-0.813777	-1.39844	-0.633052	-1.46012	-1.4649	-1.88997	-1.66418	-0.356804	-1.64378	0.0141788	-0.816065	-0.464224	-2.12916	-0.829533	-1.12825	-0.581238	-1.84621	-0.378678	-0.614549	-1.92401	-1.4579	-1.54632	-0.482952	-0.88331	-0.962619	-0.825053	-0.734814	1.25397	-0.983254	-0.615205	-0.947806	-1.87196	-0.938531	-1.21246	-0.0258329	-1.271	-0.0994226	-0.797734	-1.43489	-0.0874516
P03886	MT-ND1	-0.209432	-0.114358	-0.0855005	-0.111922	-0.0978076	0.0899518	-0.143214	-0.201352	0.313291	0.466032	0.30374	-0.00477742	0.359463	-0.192863	0.0970464	0.198987	-0.107296	-0.0273441	0.0689756	0.129487	0.079706	-0.365063	0.17356	0.469576	0.260298	0.190839	0.34035	0.233841	-0.0291423	0.351434	0.400636	-0.0906228	0.102664	0.171751	0.255907	-0.0919067	0.11427	0.119652	0.122291	-0.503205	-0.0567363	0.14037	0.222788	0.252671	-0.0978869	-0.0549372	-0.131827	-0.127173
P03891	MT-ND2	0.301067	0.0353136	0.395324	0.0729394	0.13567	0.0862324	0.167294	0.17486	0.262799	-0.0547432	0.0371457	-0.0665241	0.0571617	0.0918691	0.156434	0.0171925	-0.0146452	-0.100021	-0.120364	0.182349	0.179673	-0.0519895	-0.138833	-0.206527	0.203727	0.0507259	0.252322	0.0782789	0.225038	0.231729	0.269049	0.17604	0.291782	0.146787	0.0505419	0.446037	0.161631	0.557905	0.304023	-0.212966	0.0694284	0.526802	0.765082	0.00017372	-0.0154689	0.0636025	-0.00982021	0.405247
P03905	MT-ND4	-0.319528	-0.310331	0.831763	-0.0108772	-0.673623	-0.608496	-0.175705	0.450778	-0.0129302	-0.371559	-0.330064	-0.120606	-0.341039	-0.315704	-0.44065	0.0621789	0.0498943	0.225704	0.35632	0.0247004	-0.52679	-0.425889	-0.0591284	-0.0941531	-0.0564455	-0.259404	-0.169207	-0.652602	-0.250402	-0.274043	-0.107544	-0.123561	-0.274721	-0.0973948	0.126853	-0.0114075	-0.112803	-0.0753799	0.10359	-0.458404	0.393654	0.451773	0.0617286	-0.485141	-0.626066	-0.249044	-0.393552	0.394473
P03915	MT-ND5	-0.529849	-0.420135	0.444236	-0.254394	-0.105245	-0.106302	-0.17188	0.0661485	-0.236596	-0.223194	-0.208369	-0.340167	-0.282928	-0.226545	-0.373404	0.0991842	-0.051879	0.0472029	0.0884946	-0.106373	-0.550375	-0.188834	-0.395466	0.0757826	-0.0952447	-0.368286	-0.0808036	-0.113353	-0.230948	-0.0671646	0.42859	-0.0750933	0.109174	-0.57143	-0.35926	-0.12675	-0.198333	-0.0685024	-0.194637	-0.382226	0.0073184	-0.00808955	0.0391726	-0.197176	-0.148937	-0.071807	-0.194647	0.179047
P03952	KLKB1	-0.071341	-0.0714452	-0.0705412	-0.0720964	-0.0721662	-0.0722391	-0.0722065	-0.0726154	-0.0718019	-0.0710434	-0.072789	-0.0713537	-0.0705533	-0.0704325	-0.0710548	-0.0713588	-0.0713768	-0.0722234	-0.0711924	-0.0705648	-0.0705155	-0.0709777	-0.0720632	-0.072483	-0.0735226	-0.0722858	-0.0666033	-0.0683238	-0.0740938	-0.0712652	-0.0701293	-0.0708997	-0.0700396	-0.0667255	-0.0654228	-0.0757322	-0.0653662	-0.0710484	-0.072427	-0.0473917	-0.553103	-0.578674	-0.0720372	-0.0713852	-0.0714106	-0.0723681	-0.0719338	-0.070381
P04003	C4BPA	-0.47677	-0.709871	-0.314986	-0.705643	-0.0721662	-0.0722391	-0.0722065	-0.0726154	-0.0718019	-0.0710434	-0.072789	-0.0713537	-0.72049	-0.563399	-0.365192	-0.329717	-0.648493	-0.530199	-0.388465	-0.687306	-0.384813	0.418684	-0.741656	-0.422788	-0.073175	-0.522437	-0.285347	-0.112063	-0.0893271	-0.609314	-0.644484	-0.408644	-0.611022	-0.421608	-0.702826	0.382554	-0.528207	-0.454358	-0.840555	-0.326362	-0.826953	-0.816242	-0.882328	-0.738831	0.976603	-0.750197	-0.625568	-0.611618
P04004	VTN	-1.34683	-1.36798	-0.883556	-1.37405	-1.33802	-1.28331	-1.30782	-0.912638	-1.40311	-0.977283	-1.18829	-0.687926	-1.06017	-1.13065	-1.19171	-1.37049	-1.45302	-1.35959	-1.5164	-1.20333	-0.721258	0.222171	-1.06957	-1.078	-0.999365	-1.19861	-1.57461	-1.45811	-1.41985	-1.15038	-1.0577	-1.26364	-1.15565	-0.860375	-0.980602	-1.71643	-1.03389	-0.916989	-0.92841	-0.873874	-1.34942	-1.19641	-1.43778	-1.32328	-1.34666	-1.42116	-1.22293	-1.54895
P04040	CAT	-0.614593	-0.571945	-0.355216	-0.664452	-0.566301	-0.377567	-0.641673	0.308622	-0.351118	-0.695195	-0.618975	-0.517517	-0.497372	-0.46835	-0.807239	-0.995102	-0.973157	-0.954935	-0.640996	-0.590377	-0.814266	-0.485855	-0.67623	-0.0053149	-0.561442	-0.708395	-0.619668	-0.634141	-0.526378	-0.771302	-0.619183	-0.681861	-0.440708	-0.5527	-0.730352	-0.753909	-0.265111	-0.521036	-0.774571	-0.50116	-0.422581	-1.01695	-0.528196	-0.593772	-0.953747	-0.620717	-0.860322	-0.165219
P04062	GBA	0.346628	0.786605	0.789402	0.86039	-0.179167	-0.135002	-0.225764	0.799164	-0.19212	0.379868	0.323969	0.532579	0.178385	-0.196264	0.30257	0.297461	-0.0252646	-0.336973	0.215181	0.196237	0.320286	0.509836	0.0263855	0.18102	0.0880649	0.419388	0.653597	0.493732	0.404992	0.553398	-0.0471458	0.264589	-0.0373655	-0.231485	-0.0758439	0.211115	0.226756	0.120097	0.645816	-0.526923	0.419467	0.126765	0.308818	0.31396	-0.313231	0.595396	0.130329	0.678465
P04066	FUCA1	-0.356387	-0.23181	-0.254135	0.0117591	-0.361503	-0.405675	-0.306752	0.707989	-0.169145	0.411064	-0.195862	1.26835	-0.0662926	-0.0363124	-0.425306	0.980105	-0.176207	0.479704	1.08433	1.29199	1.29181	0.961319	-0.0855199	-0.408548	0.46185	0.434799	0.055059	-0.337426	-0.0354355	0.107421	-0.361274	0.211226	-0.164752	-0.333759	-0.221938	0.0690191	-0.355829	-0.310903	0.547723	-0.357618	-0.120474	-0.503144	-0.410355	0.784156	-0.361018	0.500824	0.636799	0.709401
P04075	ALDOA	0.0105488	0.506563	0.184162	0.201958	0.0734835	0.267913	0.10279	0.388651	0.529813	-0.0876075	0.134026	0.0837343	0.25642	0.214804	0.391721	0.0122806	0.216165	0.194381	0.0752427	-0.0991757	-0.110835	0.00673487	0.0986381	-0.0723026	0.137181	0.295197	0.1821	0.389315	0.113767	0.312656	0.385137	0.306054	0.276243	0.171265	0.128961	0.341874	0.554711	0.28775	0.318972	0.0710798	0.190259	0.3804	0.0979536	0.0467869	0.175262	0.463399	0.535163	0.286527
P04080	CSTB	0.200394	0.402578	0.237977	0.139725	0.281836	0.192492	0.176135	0.0270522	0.500509	0.242626	0.419044	0.361314	0.0785463	0.529257	0.514299	0.00313455	0.422879	0.0365582	-0.144276	0.294796	0.151722	0.133326	0.171585	0.18102	0.132794	-0.132953	-0.0939201	0.0089442	-0.353292	0.505407	-0.193909	-0.241886	0.136835	-0.197607	0.00361843	-0.312932	0.318623	0.0756822	0.135981	0.02873	-0.0409213	0.344279	0.133234	0.117036	0.585894	-0.652812	-0.21537	0.24561
P04083	ANXA1	-0.595897	-1.01086	-0.966044	-0.365126	-0.492088	-0.697453	-0.909832	0.0034486	-0.577969	-0.402853	-0.646205	0.238333	-0.411569	-0.512682	-0.183678	-0.675762	-1.15583	-0.588015	-0.340552	-0.327059	0.0998125	0.732838	-0.744672	-1.49784	-0.499989	-0.791985	-0.787718	-0.611071	0.19977	-0.952312	-0.759658	-0.835224	-0.556168	-0.408246	-0.769925	-0.634041	-0.993633	-1.48392	-1.08499	-0.0657581	0.0873281	-0.693738	-0.799066	-0.449523	-0.994981	-0.522112	-0.0929534	-0.518779
P04114	APOB	-0.909313	-0.816758	-0.453164	-0.612149	-0.528732	-1.20986	-0.956068	-1.05653	-0.919966	-0.34597	-0.959839	-0.802255	-0.682573	-0.937222	-1.0349	-0.93858	-1.07594	-0.377926	-0.872429	-0.730961	-1.24303	-0.662247	-1.01902	-0.430122	-0.123847	-0.929829	-1.10718	-1.09304	-0.61338	-0.889609	-1.02854	-0.87284	0.0157103	-0.85353	-0.807098	-1.03292	-0.638558	-0.469847	-0.759229	-0.539942	-0.728816	-0.707567	-1.07392	-1.0767	0.595031	-0.762325	-0.912814	-0.550136
P04179	SOD2	-0.614593	-0.266831	-0.379954	-0.459091	-0.589329	-0.359516	-0.767145	0.731758	-0.321822	-0.487527	-0.497146	0.0644662	-0.344938	-0.265263	-0.319038	-0.352837	-0.849207	-0.647188	-0.0973764	-0.567178	-0.659616	-0.0969244	-0.937872	-0.874116	-0.627285	-1.03433	-0.456039	-0.941511	-0.266685	-0.601589	-0.177346	-0.866073	-0.619238	-0.157272	-0.699217	-0.607974	-0.670086	-0.568299	-0.414326	-0.0858219	-0.173379	-0.427419	-0.424253	-0.385042	-0.173151	-0.363024	-0.119328	-0.0891172
P04181	OAT	-0.280439	0.0231661	-0.375788	-0.370772	-0.000484999	-0.329172	-0.175705	0.0615158	-0.249852	-0.027192	-0.553931	0.000491846	-0.286447	-0.206131	-0.316838	-0.0839077	-0.298101	-0.0366365	0.220722	-0.080715	-0.285467	-0.104482	-0.319597	0.0293441	0.0409973	-0.0934371	-0.277779	-0.564271	-0.274829	-0.140284	-0.0914779	-0.078013	-0.355349	-0.247549	-0.342035	0.149594	-0.147538	-0.177719	-0.093152	-0.102492	-0.120474	-0.228879	-0.118469	0.204262	-0.0803629	-0.0330817	-0.467594	-0.116087
P04196	HRG	-1.49867	-1.21329	-0.619869	-1.25812	-0.910684	-0.977865	-0.87858	-0.962966	-1.23358	-0.560868	-1.10907	-0.810447	-1.31819	-1.11372	-1.31067	-1.69645	-1.25923	-1.56607	-1.19264	-1.28113	-0.649682	-0.521791	-0.661023	-0.723982	-0.879581	-0.646203	-1.30336	-1.20614	-1.41292	-0.677208	-0.971816	-0.992008	-1.08802	-0.812228	-1.09083	-0.605642	-0.843439	-1.15813	-0.985651	-0.96221	-0.732862	-0.819696	-0.858897	-1.0366	-0.962966	-0.682695	-0.902048	-1.53691
P04216	THY1	-0.572991	-0.946993	-0.592831	-0.648977	-0.601968	-0.737356	-0.727759	-0.382821	-0.665777	-1.13753	-0.664458	-0.493757	-0.535937	-0.566082	-0.337275	-1.05724	-1.07594	-0.964777	-1.10115	-0.384007	0.0160895	-0.578381	-0.510236	-0.506866	0.326476	-0.690544	-0.712981	-0.566406	-0.734908	-0.601589	-0.515504	-0.606778	-0.472745	-0.607522	-0.409574	-0.651757	-0.70366	-0.55746	-0.612212	-0.249523	0.193725	-0.383284	-0.697939	-0.597886	-0.685568	-0.331606	-0.18576	-0.512902
P04217	A1BG	-1.28686	-1.30171	-0.285109	-1.44631	-1.28874	-0.850915	-1.04833	-1.37501	-1.15446	-1.33636	-1.32512	-1.17413	-1.18283	-1.0765	-1.13727	-1.50214	-1.31784	-1.35004	-1.43441	-1.51089	-1.07061	-1.18654	-1.40452	-1.28475	-0.285979	-1.26674	-1.23668	-1.10261	-0.805402	-1.00326	-1.19745	-0.7824	-1.28507	-0.870867	-0.935577	-1.2085	-1.0155	-1.23305	-1.12687	-0.773461	-0.986176	-1.06482	-1.06906	-1.17547	-1.18909	-0.995693	-1.09262	-1.28329
P04233	CD74	-0.488829	-0.404032	-0.465198	-0.0710597	-0.344859	-0.406444	-0.414242	0.606238	-0.212424	-0.107487	-0.279366	0.393722	-0.568241	-0.44518	-0.340016	-0.227443	-0.360248	0.147263	0.715614	-0.0241071	-0.0526802	0.770609	-0.235134	-0.231755	0.0037741	-0.109987	-0.248849	-0.582705	0.712967	-0.130008	-0.370614	-0.126008	-0.269715	-0.384849	-0.271619	0.295198	-0.362841	-0.396934	-0.00961928	-0.563688	0.315858	-0.877347	-0.491839	-0.337112	-0.122973	0.73305	0.535699	-0.0224801
P04264	KRT1	-0.0519655	-0.602945	-0.665219	-0.816213	-0.474025	-0.912098	-0.5559	-0.471073	-0.707843	0.262195	-0.73024	0.332409	-0.480934	0.226469	-0.959413	-0.854845	-0.00473272	-0.637211	-0.906973	-0.703644	0.0702348	0.70489	-0.599603	-0.531315	-0.298016	-0.985791	-0.819269	-0.743532	-0.226077	-0.76484	-0.494516	-1.16222	-0.532623	-0.991245	-0.899726	-0.54972	-0.37914	-0.562082	-0.502882	-0.0906749	-0.771168	-0.169937	-0.73237	-0.79885	-0.736071	0.124253	-0.722012	-0.457144
P04271	S100B	-1.46477	-0.924131	-1.45017	-1.58574	-0.120547	-0.997117	-0.564057	-0.777603	-1.16277	-1.26017	0.163979	-1.57108	-0.800519	-2.01183	-1.25062	-0.93858	-1.46934	-0.54789	-0.341875	-1.44871	-1.56569	-1.507	-0.12766	-0.281241	-1.7572	-1.22275	-0.667322	0.0612303	-0.883894	-0.497332	-1.71904	-0.42836	-1.40637	-0.5527	-0.667105	-0.706464	-1.3555	-0.380259	-1.62603	-1.25704	-1.3988	-0.944475	0.469787	-1.39974	-1.46248	0.665209	-0.436245	-1.97747
P04275	VWF	-0.997719	-1.07963	-0.929721	-0.851321	-1.05204	-1.03453	-1.09935	-0.689365	-1.02731	-0.620615	-0.929519	-0.218777	-0.704856	-1.00979	-0.81321	-1.17763	-1.00086	-0.996832	-1.05097	-0.876176	-0.669961	0.139767	-1.47523	-1.12438	-1.37021	-1.10818	-1.03613	-1.24719	-0.377576	-0.750028	-1.06295	-1.05287	-0.925111	-1.43214	-1.4159	-2.37025	-1.75644	-1.8408	-0.861209	-0.464554	-0.471413	-0.950507	-0.804721	-0.677961	-0.588998	-0.563794	-0.212026	-0.799822
P04278	SHBG	-0.144694	-0.02459	-0.317816	-0.0919685	-0.0221381	-0.358142	-0.375949	-0.125227	-0.467004	-0.270707	-0.468456	0.218109	-0.344945	-0.257458	-0.368551	-0.197179	-0.327785	-0.224779	-0.154726	-0.724726	-0.0631557	0.048987	-0.517037	-0.146567	0.00200715	-0.0735241	-1.18985	-1.01412	0.343535	-0.0696774	-0.374592	-0.265218	-0.550906	-1.42385	-0.925697	-0.763472	-0.686872	-0.336568	-0.125655	-0.406835	0.0127462	-0.284225	-0.293855	-0.214554	-0.343772	0.0881119	-0.0543532	-0.0695868
P04350	TUBB4A	-0.465736	-0.301034	-0.478026	-0.785019	0.0163685	-0.415148	-0.714821	-0.66065	-0.438462	-0.483061	-0.200256	-0.583305	-0.100502	-0.035201	-0.00565491	-0.447035	-0.319596	-0.488173	-0.444621	-0.388327	-0.898297	-0.989326	-0.390185	-1.0606	-1.23175	-0.875366	-0.5782	0.0574071	-0.812668	-0.792959	-0.384812	-0.403648	-0.458304	-0.17559	-0.307066	0.697152	-0.149745	-0.197398	-0.629559	-1.22707	-0.97326	-0.658669	-0.336656	-0.41129	-0.529591	-0.121938	-0.516935	-0.495324
P04406	GAPDH	-0.375168	0.253565	-0.085525	-0.113874	-0.310815	-0.438072	-0.534366	0.150464	0.151025	-0.578622	-0.0986144	0.0725297	-0.376429	-0.186879	-0.181853	-0.403154	0.00704559	-0.335326	0.0399449	-0.672092	-0.806517	-0.450411	-0.213691	-0.181608	0.203851	0.331047	-0.365766	-0.0887747	-0.39055	0.103677	-0.129674	-0.191836	-0.162632	-0.249416	-0.299092	0.923365	0.25286	-0.130343	-0.175194	-0.82666	-0.303858	0.0808453	-0.171344	-0.259561	-0.0907074	0.0656632	-0.21735	0.0842071
P04424	ASL	-0.189321	-0.0745599	-0.0111593	-0.176495	-0.122377	0.150791	0.395918	-0.014819	0.0136218	-0.0331379	-0.281004	0.089537	-0.110142	-0.316671	0.122145	-0.126078	-0.0402302	0.289763	-0.114641	0.0255996	-0.231044	-0.00225601	-0.00239194	0.111798	0.193872	0.149868	-0.0321365	0.208836	-0.318062	-0.344428	-0.229401	-0.2761	-0.215797	-0.121151	-0.128105	-0.215302	-0.33141	-0.192354	-0.218929	-0.159396	-0.170532	-0.00325043	-0.0382036	-0.0479622	-0.0250943	-0.107901	-0.286984	-0.0361827
P04439	HLA-A	-0.167688	0.201509	-0.261165	0.598696	-0.0274458	-0.265003	-0.10455	0.933672	-0.0681826	-0.306983	0.0202967	0.790489	-0.36029	-0.527433	-0.228693	-0.197665	-0.153073	-0.0492252	0.822464	-0.288365	-0.184341	0.65079	-0.126862	-0.383233	0.14636	0.293835	-0.0251188	-0.221709	0.734505	-0.0591214	-0.148258	-0.138514	-0.110396	-0.164897	-0.0303377	0.151994	-0.212965	-0.243482	-0.00136349	-0.567059	-0.0447229	0.141895	-0.443753	-0.0816744	0.669376	0.558982	0.894306	-0.213176
P04440	HLA-DPB1	-0.231325	-0.0724881	-0.0738594	-0.276037	-0.151311	-0.535685	-0.579907	0.334774	0.00918766	-0.0534849	-0.0378185	0.268266	-0.736547	-0.889141	-0.785832	0.404751	0.167483	0.664343	0.679689	-0.122792	-0.163924	0.612334	-0.182925	-0.0802344	0.00103768	0.037958	-0.0666033	-0.0683238	-0.0740938	-0.0913317	0.0231515	-0.0483857	-0.103787	-0.874137	-0.802791	-0.72899	-1.17102	-0.149266	0.153339	-0.707258	0.267776	-0.635468	-0.722657	0.479741	-0.0835801	0.729268	0.84814	0.0832552
P04632	CAPNS1	0.0991365	0.249555	0.0206606	-0.112544	0.0854548	-0.0107239	0.159206	0.248113	0.0663468	-0.0925848	0.215292	-0.00250506	-0.0775274	0.017395	-0.0286753	0.0394611	0.0704653	0.179755	0.267203	-0.0443859	0.190109	0.106461	0.174347	0.244677	0.187	0.00395741	0.0680707	0.389315	0.232103	0.222441	0.181745	0.0880343	0.122483	0.0341351	-0.161121	-0.0819249	0.146487	0.0153275	0.0291507	-0.0595148	0.193098	0.030462	0.0318077	0.118942	0.130078	0.0162049	-0.00606448	-0.1277
P04792	HSPB1	0.287936	0.592109	0.602643	-0.226869	0.665423	0.288616	0.778022	-0.181977	0.30539	0.64964	0.671546	0.363319	0.405104	0.682428	0.862059	0.303271	0.633755	0.532207	0.163373	0.38432	0.676621	0.457357	0.446446	0.717409	0.0585156	0.976683	0.0529774	0.764756	-0.161912	0.299682	-0.108495	0.846749	0.575255	0.371708	0.473803	-0.456768	0.551317	0.535164	-0.0531062	0.50295	-0.0422519	0.263015	0.391965	0.362658	0.493482	0.321316	-0.0133145	0.0557707
P04839	CYBB	0.0337328	-0.0948965	-0.0109513	0.117993	-0.538973	-0.556553	-0.442015	0.273668	-0.00689858	0.0103902	-0.10661	0.412689	-0.313684	-0.216757	-0.217187	0.0425276	0.063735	0.141517	0.0412139	-0.159446	-0.245706	-0.104482	0.0134891	-0.00502239	0.257818	0.12049	-0.458931	-0.450837	0.838994	-0.290967	0.164525	-0.535416	-0.0188284	-0.134169	-0.05405	0.129069	-0.129624	-0.371726	0.0390187	-0.385216	0.311483	-0.673167	-0.233995	-0.264826	-0.247043	0.431075	0.0501601	-0.0488423
P04843	RPN1	0.0190723	0.319304	0.11224	0.145121	0.0561236	0.219305	0.238511	0.37793	0.0900509	0.347839	0.0271769	0.455678	0.288622	0.472206	0.42799	0.203706	0.199411	0.349272	0.398426	0.100404	0.178695	0.396686	0.0817951	0.13265	-0.283197	0.210063	0.167323	-0.157401	0.177287	-0.035541	0.0753691	-0.00154159	0.232159	0.372966	0.307484	-0.0178662	0.152472	0.318702	0.328283	0.165597	0.147607	0.0788758	0.397636	0.171325	0.328459	0.356503	0.364607	0.137677
P04844	RPN2	0.012534	0.0909633	0.0652858	0.0911625	-0.0260469	-0.0223101	0.0088076	0.075834	-0.00187563	0.284015	-0.0872244	0.35284	-0.255812	-0.129785	-0.241199	-0.127945	-0.130902	0.0400201	0.00770928	0.113484	0.076627	0.458831	-0.228168	-0.0816752	0.0312676	0.0281475	-0.00750557	-0.248972	0.0797421	-0.0659492	-0.0799951	0.0200005	0.0824566	0.0466342	0.175995	-0.23797	-0.0854632	0.100149	0.14381	0.12344	0.0429757	-0.150504	0.17127	0.090084	-0.0353235	0.144317	0.0879026	0.0672582
P04899	GNAI2	-0.119294	-0.11733	-0.0927393	-0.461598	-0.391357	-0.474266	-0.279769	-0.156474	-0.37438	-0.288873	-0.42575	0.281306	-0.5324	-0.034164	-0.1674	-0.362164	-0.239983	-0.238939	-0.276188	-0.100576	-0.12721	0.290282	-0.379452	-0.628361	-0.242432	-0.551116	-0.230334	-0.26712	0.180743	-0.438893	-0.0811731	-0.0903405	-0.304747	-0.337742	-0.385316	-0.0699651	-0.448714	-0.214434	-0.558022	-0.183233	-0.219119	-0.348613	-0.160618	-0.608402	-0.494558	-0.139994	-0.284201	-0.465224
P05023	ATP1A1	0.0757397	0.650213	-0.0776974	-0.220877	0.0970666	-0.145893	-0.00731327	0.0107096	0.0150116	-0.407204	-0.139279	0.121628	-0.253114	0.463253	0.214362	0.0235514	-0.149905	-0.226802	0.00313201	-0.0624791	-0.109094	0.0562297	0.160984	-0.202794	0.424468	-0.249459	-0.0231944	0.141301	-0.620952	-0.107126	0.0986804	-0.186438	-0.108466	-0.170312	0.000915764	-0.137508	-0.00609135	-0.0251766	-0.0599972	-0.152336	-0.35492	-0.390461	-0.0472913	-0.100018	-0.0762842	-0.353435	-0.259698	-0.159372
P05026	ATP1B1	-0.531551	-0.145154	-0.503131	-0.869315	-1.4782	-1.85611	-1.6325	-1.4404	-0.977546	-1.34513	-0.886051	-1.00377	-1.35597	0.0271507	-0.490338	-1.33207	-1.28669	-1.21738	-1.34484	-1.05175	-1.35619	-1.32493	-1.26714	-1.33539	-0.610681	-1.21586	-1.38717	-1.20249	-0.896177	-1.26663	-1.355	-1.02168	-1.0907	-2.00946	-2.3384	-0.427114	-1.30359	-1.28553	-1.36183	-1.37865	-1.42466	-1.3599	-0.937178	-1.49422	-1.66162	-1.03207	-1.40316	-0.695574
P05067	APP	-0.248985	-0.0205252	-0.0818845	-0.373614	0.155538	0.161245	0.0965835	0.287747	-0.238108	-0.159407	-0.141877	0.420889	-0.050933	-0.00645625	-0.0768501	0.0857722	0.079991	-0.241282	0.128083	0.0412491	0.0914937	0.164727	-0.138034	0.0454832	-0.00560819	-0.110601	-0.0522597	0.0554145	0.111736	0.00257237	-0.1451	0.0529731	-0.10338	0.0372791	-0.0329531	-0.108948	0.0125701	-0.078964	0.23877	-0.555488	0.495579	0.0698514	-0.30817	-0.00630806	-0.155012	0.0385584	0.0951385	-0.0835685
P05090	APOD	-0.223773	-1.08062	-0.69286	-1.07644	-0.97234	-1.19732	-0.557353	-0.391587	-0.994859	-0.568663	-1.02429	-0.255439	-1.31819	-0.530456	-1.32945	-1.14015	-0.99267	-1.10573	-1.10578	-1.09887	-0.712762	-0.237524	-0.865763	-0.971805	-0.500014	-1.10021	-1.17541	-0.9782	-1.00179	-0.946659	-1.13408	-1.01202	-1.02154	-0.883022	-0.898922	-1.25112	-0.888497	-0.975234	-0.90636	-0.530596	-0.976335	-0.987714	-0.992157	-0.916521	-0.540176	-0.698794	-0.842437	-0.871432
P05091	ALDH2	-0.317906	-0.400011	-0.746961	-0.626052	-0.691519	-0.29324	-0.424117	-0.0552275	-0.399445	-0.612771	-0.955523	0.123584	-0.880481	-0.366783	-0.407815	-0.311862	-0.485549	-0.604455	-0.549452	-0.117612	-0.536395	0.171188	-0.686476	-0.980133	-0.177523	-0.678044	-0.329058	-0.758241	-0.622771	-0.984682	-0.388481	-0.636103	-0.549272	-0.661983	-0.6508	0.189155	-1.12158	-0.740156	-0.393713	-0.355281	-0.471413	-0.671084	-0.735756	-0.698155	-0.296392	-0.477948	-0.120834	-0.833135
P05107	ITGB2	-0.503199	-0.417994	-0.524661	-0.41442	-0.454356	-0.600135	-0.362155	1.02417	-0.580532	0.213012	-0.772139	1.20489	-0.432454	-0.345156	-0.300145	-0.46312	-0.343131	0.292384	-0.372833	0.649523	0.682758	1.00093	-0.206741	-0.613951	-0.0773208	0.313243	-0.30911	-0.837643	0.791562	-0.00469689	-0.455422	-0.208666	-0.447389	-0.23632	0.0105739	-0.0792029	-0.0530593	-0.347516	-0.0405233	-0.448759	0.668952	-0.698455	-0.457161	-0.157453	-0.119356	0.400645	0.463901	0.107265
P05109	S100A8	-0.834593	-0.621902	-0.891769	-0.944022	-0.679655	-1.06698	-0.758327	0.444314	-1.35686	-1.18804	-0.363053	-1.71849	-1.35597	-2.05239	-1.93989	-1.16551	-1.14385	-0.969386	-1.02697	-1.08508	-1.56569	-2.0357	-1.07923	-0.748631	-1.35617	-0.353504	-1.11412	-1.05906	0.477018	-1.11827	-0.965413	-1.0187	-1.23986	-1.89137	-1.45126	-1.60115	-1.48432	-0.711509	-0.885272	-0.782537	-0.557683	-1.01695	-1.15164	-0.953732	-0.0814557	-0.39548	-1.75232	-0.407418
P05141	SLC25A5	0.044677	-0.112762	0.0222505	0.10064	-0.21198	0.29231	-0.294017	-0.0620241	0.361314	0.548003	0.238519	0.590482	0.170601	-0.0159597	0.0603268	0.596722	0.223975	0.610159	0.603458	0.493851	0.464493	0.0794451	0.370695	0.403656	0.403848	0.441925	0.501138	0.224496	0.163447	0.16898	0.0480528	-0.0798033	-0.154239	0.159299	0.35932	0.248291	0.0546051	0.0133927	0.302759	0.321927	0.449446	0.694084	-0.0595351	0.291804	0.148758	0.468121	0.402896	0.511542
P05155	SERPING1	-1.07425	-1.06366	-0.0460995	-1.24289	-1.43464	-1.32739	-1.48193	-0.838647	-1.0822	-1.32842	-1.26276	-1.15758	-1.06516	-1.04162	-0.988287	-1.22701	-1.06678	-1.17323	-1.02935	-1.33831	-1.0846	-0.738324	-1.26602	-1.4015	-0.650421	-1.37114	-1.46612	-1.35816	-1.18205	-1.21631	-1.14934	-1.12732	-0.880697	-0.909263	-1.22023	-1.43171	-1.23856	-0.943656	-1.31968	-0.744831	-1.30689	-1.22207	-1.3574	-1.46569	-0.819376	-1.24659	-1.38958	-1.26699
P05156	CFI	-1.29697	-1.15771	-0.248062	-1.31063	-1.22814	-0.825184	-1.29456	-0.906414	-1.31776	-1.12247	-1.38562	-1.02429	-1.34585	-1.3184	-1.30466	-1.63154	-1.50169	-1.60662	-1.54265	-1.78087	-1.21411	-1.29076	-1.06469	-0.95291	-0.177523	-1.24104	-1.36129	-1.1607	-0.935885	-1.28507	-1.56538	-0.931312	-1.27099	-1.14791	-1.46436	-1.48775	-1.20946	-1.39646	-1.56199	-1.25704	-1.36374	-1.17837	-1.30403	-1.41217	-0.985689	-1.20657	-1.16855	-1.07169
P05161	ISG15	-0.071341	-0.0714452	-0.0705412	-0.0720964	-0.432274	-0.461557	0.0446082	-0.39687	0.386488	0.588321	0.493876	0.445141	-0.105411	-0.347057	-0.125073	0.137382	0.20936	0.20721	0.368806	-0.184016	-0.597097	0.880652	0.0458314	-0.304182	-0.305899	0.887374	-0.276149	-0.48943	1.67902	0.267608	0.0935784	-0.0603923	0.000642809	-0.0667255	-0.0654228	-0.0757322	-0.0653662	0.32062	0.479255	-0.0118006	0.426895	-0.0653571	-0.333643	-0.195988	0.390222	0.0688135	0.000354272	-0.070381
P05164	MPO	-0.428449	-0.36057	-0.367461	-0.319701	0.0705921	-0.142505	0.290887	0.0383557	-0.594486	-0.305239	-0.641333	0.346276	-0.796471	-0.636734	-0.96516	-0.952538	-0.738038	-0.927277	-0.95827	-0.783402	-0.778632	-0.926657	-0.719936	-0.327503	-0.204711	-0.295066	-0.932268	-1.00515	0.1037	-0.451396	-0.68788	-0.46433	-0.729082	-0.304076	-0.229477	0.200832	0.0593678	-0.205573	-0.15674	-0.215544	0.481627	0.143045	-0.439689	-0.601408	0.000893769	0.345435	-0.0894751	-0.225333
P05165	PCCA	-0.184054	-0.0973903	-0.185849	0.0190116	-0.0553753	0.0659158	-0.173426	-0.233119	-0.0432456	-0.144727	-0.146112	-0.343845	0.206945	0.251556	0.0455275	-0.0779924	-0.653084	-0.479364	-0.198386	-0.212648	-0.610617	-0.335733	-0.348112	-0.248041	-0.0601465	-0.276606	0.0776626	0.23238	-0.0243508	-0.335465	0.0737196	-0.0505578	-0.0549099	-0.236172	-0.226694	-0.119901	-0.211977	-0.0977318	-0.0748074	0.264893	-0.0655336	-0.193614	0.0238819	-0.204174	-0.263486	-0.238325	-0.230747	-0.384094
P05166	PCCB	-0.181522	-0.237228	-0.292623	-0.456003	0.310995	-0.0785796	-0.278965	0.136267	-0.200005	0.0334924	-0.309456	-0.28959	0.174638	0.260982	-0.0534686	0.406139	-0.0208644	-0.0735775	0.0361966	0.376645	-0.0948003	0.544495	-0.0629412	-0.19237	0.41942	-0.171656	-0.204784	-0.0711939	-0.531169	-0.473298	0.212902	-0.232679	0.0906167	0.0363883	0.215932	0.00252582	0.376634	-0.205052	-0.198461	0.112889	-0.00788682	-0.267645	0.121104	-0.311812	-0.210922	0.0857583	0.306513	0.139784
P05186	ALPL	-0.071341	-0.0714452	-0.0705412	-0.0720964	-0.576301	-0.099562	-0.206431	-0.714531	-0.0718019	-0.0710434	-0.072789	-0.0713537	-0.539751	-0.38533	-0.631103	-0.357602	-0.15829	0.013818	-0.339408	-0.97097	-0.309689	0.0296821	-0.824213	-0.371353	0.454066	-0.618712	-1.1094	-1.1079	-1.06765	-0.0712652	-0.0701293	-0.0708997	-0.0700396	-0.639662	-0.69273	0.195074	-0.443326	-0.0710484	-0.072427	-0.268408	-0.299506	-0.68752	-1.30403	-0.666088	-0.0714106	-0.0723681	-0.0719338	-0.070381
P05198	EIF2S1	0.197693	0.0444358	0.201286	0.257685	0.124376	0.266521	0.390307	0.207947	0.121836	0.144505	0.0634323	0.24318	0.250608	-0.138836	0.011186	0.23838	0.28019	0.39923	0.383517	0.267166	0.131523	0.194118	0.24851	0.423381	-0.201188	0.529073	0.193665	0.0447827	0.24556	0.104648	0.129024	-0.00154159	0.00134299	0.349718	0.170508	-0.0349874	0.162613	0.0927935	0.0562497	0.414027	-0.156591	0.0290129	0.380746	-0.0112219	-0.085661	0.189339	-0.0478874	0.451055
P05204	HMGN2	-0.071341	-0.0714452	-0.0705412	-0.0720964	-0.0721662	-0.0722391	-0.0722065	-0.0726154	0.481952	-0.863361	0.738159	-0.0713537	-0.0705533	-0.0704325	-0.0710548	-0.0713588	-0.0713768	-0.0722234	-0.0711924	-0.0705648	-0.0705155	-0.0709777	-0.0720632	-0.072483	-0.0735226	-0.0722858	-0.0666033	-0.0683238	-0.0740938	-0.0712652	-0.0701293	-0.0708997	-0.0700396	-0.0667255	-0.0654228	-0.0757322	-0.0653662	-0.0710484	-0.072427	-0.0696482	-0.0732392	-0.0716616	-0.0720372	-0.0713852	-0.0714106	-0.0723681	-0.0719338	-0.070381
P05362	ICAM1	-0.359552	-0.0699447	-0.500896	-0.480373	-0.22881	-0.419642	-0.199565	0.0107096	-0.196847	-0.49229	-0.527232	-0.265878	-0.505506	-0.469864	-0.117459	-0.362164	-0.364349	-0.474895	-0.243595	-0.587204	-0.751377	0.151974	-0.329352	-0.888508	-0.0663246	-1.21056	-0.736381	-0.914615	-0.457654	-0.491777	-0.465932	-0.499037	-0.519689	-0.655044	-0.372597	0.404739	-0.471577	-0.58844	-0.692639	-0.494431	-0.184903	-0.494397	-0.681162	-0.537085	-0.0407916	-0.429576	-0.251476	-0.508086
P05386	RPLP1	0.794855	0.543583	1.33665	0.38663	0.503351	0.579723	0.408513	0.115155	0.509996	-0.0179835	0.426802	-0.415951	0.734023	0.102938	0.470554	0.283427	0.104645	0.290914	0.162291	0.247228	0.214851	0.00805404	0.178973	0.233731	0.300473	0.197138	0.94181	0.948868	0.637644	0.299682	0.336574	0.314285	0.735357	0.433406	0.243495	-0.54972	-0.039961	0.687299	0.336928	0.310137	-0.220531	0.298545	0.768481	0.466053	0.574983	0.332611	0.0558535	0.406581
P05387	RPLP2	0.569581	0.271559	0.750179	0.102699	0.467619	0.632011	0.668313	-0.0160694	0.444585	0.305562	0.198864	-0.419971	0.845579	0.31066	0.589122	0.498111	0.444003	0.506855	0.465026	0.753056	0.488866	0.160243	0.507038	0.360246	0.98699	0.364332	0.615966	0.788362	0.308329	0.152546	0.303857	0.119729	0.528713	0.656876	0.181468	-0.39064	0.251207	0.202049	-0.0307399	0.643084	-0.183238	0.742741	0.809851	0.090084	0.384041	0.164333	0.0893573	0.17347
P05388	RPLP0	0.512755	0.315728	1.08707	0.236807	0.266205	0.551638	0.31055	0.165208	0.591361	0.398756	0.35374	0.298229	0.592612	0.307533	0.523613	0.536281	0.668315	0.635828	0.494768	0.952884	0.817508	0.574703	0.503687	0.538699	0.646376	0.592072	0.790133	0.502097	0.394467	0.450358	0.596831	0.652613	0.761519	0.801106	0.506849	0.16348	0.727926	0.756359	0.398857	0.576561	0.320413	0.450342	0.817508	0.376115	0.240608	0.122507	0.0596901	0.359643
P05413	FABP3	0.162963	0.157594	0.871213	1.33898	0.0180702	-0.137148	0.133509	1.06246	0.741055	0.279314	0.485132	0.834313	-0.187578	0.70231	0.0862601	0.255694	0.553926	0.961061	0.379318	0.699375	1.08376	0.826655	0.29516	0.0222768	0.265234	0.420417	0.161215	0.898499	-0.102671	0.852577	0.726648	0.661462	0.40756	-0.00461308	1.13557	-0.110366	-0.072717	0.533277	1.25439	-0.279205	0.454242	1.23207	0.441564	0.243835	0.654865	0.636901	0.419077	0.0485384
P05452	CLEC3B	-0.071341	-0.0714452	-0.0705412	-0.0720964	-0.0721662	-0.0722391	-0.0722065	-0.0726154	-0.0718019	-0.0710434	-0.072789	-0.0713537	-1.19053	-0.697297	-0.892235	-0.241581	-0.293782	-0.0139333	-0.311544	-0.381121	-0.519437	-0.442819	-0.400706	0.0314674	0.0422794	-0.410467	-0.156957	-0.219382	-0.197726	-0.23881	-0.218343	-0.0881558	-0.219556	-0.20994	0.0233369	0.098146	-0.175769	-0.228258	-0.198381	0.0527111	-0.473422	-0.280563	-0.425342	-0.827087	-0.666067	-0.89005	-1.06824	-0.070381
P05455	SSB	0.132076	-0.026634	0.0363485	0.0929	0.317814	-0.071833	0.13721	0.0258788	0.168505	-0.00657655	-0.039638	-0.229611	0.0511055	0.0607371	0.0247055	0.0716744	0.0704653	0.0560012	0.143019	0.101048	0.0847709	-0.0867941	0.142678	0.121678	0.286165	0.122819	0.026031	0.0992229	0.332562	-0.0577107	0.0986804	0.0325335	0.0232409	0.106571	0.278638	-0.071867	0.0234552	0.117387	-0.0997445	0.315622	0.140304	0.0764051	-5.90782e-18	0.19286	-0.161197	-0.317759	-0.189517	0.109233
P05543	SERPINA7	-0.071341	-0.0714452	-0.0705412	-0.0720964	-0.0721662	-0.0722391	-0.0722065	-0.0726154	-0.0718019	-0.0710434	-0.072789	-0.0713537	-0.0705533	-0.0704325	-0.0710548	-0.0713588	-0.0713768	-0.0722234	-0.0711924	-0.0705648	-0.0705155	-0.0709777	-0.0720632	-0.072483	-0.0735226	-0.0722858	-0.0666033	-0.0683238	-0.0740938	-0.0712652	-0.0701293	-0.0708997	-0.0700396	-1.25685	-1.055	-1.2295	-0.940348	-0.0710484	-0.072427	-0.0696482	-0.0732392	-0.0716616	-0.0720372	-0.0713852	-0.0714106	-0.0723681	-0.0719338	-0.070381
P05546	SERPIND1	-0.977806	-1.15771	-0.243719	-1.08205	-1.21506	-1.15717	-1.13837	-1.2902	-1.07706	-1.01893	-1.06942	-0.852019	-1.25572	-1.14187	-1.19171	-1.32493	-1.39823	-1.25902	-1.28237	-1.19735	-0.882597	-1.00532	-1.35636	-1.47221	-0.913637	-1.56064	-1.26794	-0.95782	-0.765672	-1.11069	-1.14934	-0.981502	-1.06425	-1.1286	-1.29634	-1.48775	-1.18639	-1.1834	-1.30381	-1.15392	-1.08314	-1.38989	-1.38006	-1.36311	-0.887474	-1.08723	-1.41239	-0.970865
P05549	TFAP2A	-0.071341	-0.0714452	-0.0705412	-0.0720964	0.114387	0.215127	0.328613	-0.188882	0.0893792	0.185953	0.0612813	-0.059255	0.334072	-0.0363124	0.00634784	0.223194	0.430799	0.302452	0.0124369	-0.253969	0.418033	-0.641478	-0.143849	-0.374999	-0.588329	-0.168478	-0.173275	-0.292856	-0.301943	-0.354508	-0.480902	-0.258208	-0.276258	0.671573	0.233669	-0.0504899	0.385049	0.153966	-0.048912	0.105778	-0.0804869	-0.0456042	0.182969	-0.12727	0.064679	0.0548699	0.133105	-0.070381
P05556	ITGB1	0.216865	0.448069	0.0618737	-0.396959	0.189067	-0.15372	-0.00801554	0.249958	0.223552	-0.475891	-0.174243	-0.0870504	-0.435506	0.583949	0.288213	-0.218178	-0.322641	-0.43052	-0.044681	-0.263755	-0.370278	0.319336	0.0251808	-0.567455	-0.210428	-0.801367	-0.0677553	-0.27301	-0.393217	-0.521891	0.19287	-0.485957	-0.181818	-0.261798	-0.0519329	-0.664666	0.440217	-0.111475	-0.533535	-0.0138897	-0.29342	-0.191447	-0.0800164	-0.307674	-0.0467245	-0.380106	-0.270479	-0.204081
P05783	KRT18	-1.81145	-1.90196	-1.3419	-1.8588	-1.50101	-1.96626	-2.16223	-1.17131	-1.94494	-1.79213	-1.76163	-1.39427	-2.73588	-2.30071	-2.35352	-1.84579	-2.12978	-1.90478	-2.05754	-1.18102	-0.972523	-0.0606644	-2.09979	-2.5493	-1.95757	-2.32261	-1.93268	-2.10573	-1.98356	-1.72719	-1.38904	-1.81749	-1.83944	-2.479	-1.99985	-2.69391	-2.51916	-1.88304	-1.75665	-1.08887	-1.68551	-1.78798	-1.02398	-2.15135	-1.6315	-1.53017	-1.19294	-1.78964
P05787	KRT8	-1.91143	-2.00089	-1.46083	-1.65915	-1.6621	-1.92737	-1.77661	-1.88889	-2.2202	-2.19091	-1.79238	-1.56111	-2.53212	-2.03226	-2.21029	-2.6091	-2.72909	-2.60881	-2.8038	-1.97633	-1.16737	0.0309911	-1.90093	-2.65249	-2.71718	-2.50404	-2.55571	-2.15628	-2.30601	-2.60207	-2.4391	-2.09036	-2.39911	-1.91801	-1.47552	-3.10569	-2.44601	-2.80162	-2.44614	-1.07595	-2.18788	-2.33397	-0.84457	-2.08614	-1.90006	-2.32158	-1.68494	-1.65719
P05813	CRYBA1	-0.51685	-0.646662	-0.775214	-0.623126	-0.468865	-0.561342	-0.188556	0.219271	-0.0718019	-0.0710434	-0.072789	-0.0713537	-0.612092	0.329605	0.0393525	-0.180555	-0.464945	-0.0917074	-0.352096	-0.742908	-0.671728	1.33395	-0.66364	-0.0885462	0.0626199	-0.297581	-0.546555	-0.537079	-0.600394	-0.59209	-0.83848	-0.55491	-0.555065	-0.786766	-0.451361	-0.159571	0.0698086	-0.523027	-0.681431	-0.381131	-0.886802	-0.437233	-0.681162	-0.820277	0.292848	-0.796447	-0.576341	-0.615957
P05937	CALB1	-0.071341	-0.0714452	-0.0705412	-0.0720964	-0.477179	-0.677422	-0.308511	-0.887057	-0.0718019	-0.0710434	-0.072789	-0.0713537	-0.400624	-0.212649	-0.411066	-0.609022	-0.65386	-0.557583	-0.539889	-1.14582	-1.34574	-1.18165	-0.520081	-0.367436	-0.195784	-0.456833	-1.98392	-1.82926	-1.89803	-1.29973	-1.28391	-1.31475	-1.50494	-1.49643	-1.61292	0.512729	-1.26017	-1.17981	-0.913163	-0.349669	0.182871	-0.526753	-0.642438	-1.32997	-0.603754	-1.22931	-1.12584	-0.070381
P06132	UROD	-0.225175	-0.274854	-0.053702	0.0911625	-0.0721662	-0.0722391	-0.0722065	-0.0726154	-0.507309	-0.139933	-0.452767	-0.260155	-0.341956	-0.289268	-0.577762	-0.0030656	-0.0699406	0.178728	-0.0684483	-0.119086	-0.322211	-0.55875	-0.479173	-0.304182	0.28418	0.0170299	-0.252365	-0.126174	-0.223352	-0.114279	-0.458028	0.0440217	-0.497332	-0.0527387	-0.226443	-0.35235	-0.299337	-0.228434	-0.0196683	-0.317605	-0.0780601	-0.238044	0.175132	-0.246702	-0.481809	-0.0723681	-0.247391	-0.107616
P06241	FYN	-0.071341	-0.0714452	-0.0705412	-0.0720964	-0.0721662	-0.0722391	-0.0722065	-0.0726154	0.857682	0.51829	1.51799	0.732293	-0.0705533	-0.0704325	-0.0710548	-0.0713588	-0.0713768	-0.0722234	-0.0711924	-0.0705648	-0.0705155	-0.0709777	-0.0720632	-0.072483	-0.0735226	-0.0722858	-0.0666033	-0.0683238	-0.0740938	-0.0712652	-0.0701293	-0.0708997	-0.0700396	-0.0667255	-0.0654228	-0.0757322	-0.0653662	-0.0710484	-0.072427	-0.0696482	-0.0732392	-0.0716616	-0.0720372	-0.0713852	-0.0714106	-0.0723681	-0.0719338	-0.070381
P06280	GLA	-0.116929	0.159117	-0.0410111	0.0929153	-0.00636695	-0.320051	-0.16375	0.767744	-0.414449	0.140818	-0.343845	0.650856	-0.632969	-0.735616	-0.626076	-0.159252	-0.140342	-0.19439	0.156831	-0.0609176	0.0947987	0.275276	-0.516392	0.219035	-0.561442	0.537135	-0.258574	-0.132857	0.0429625	0.0378991	0.117383	-0.0486548	-0.184596	0.0501241	0.245166	0.0410634	0.0928465	-0.715065	-0.424683	-0.35035	0.266639	-0.133365	-0.480231	0.439126	-0.0379811	0.738819	0.707685	-0.032657
P06396	GSN	-0.422899	-0.101164	-0.415143	-0.480373	-0.284334	-0.573123	-0.268225	-0.164592	-0.521508	-0.342539	-0.315325	-0.30771	-0.564458	-0.377239	-0.134722	-0.607437	-0.607091	-0.474895	-0.759602	-0.498668	-0.264875	0.515701	-0.0560854	-0.411579	-0.689636	-0.494874	-0.644764	0.202644	0.123376	-0.85989	-0.313557	-0.0420394	-0.378988	-0.493875	-0.278179	-0.319697	-0.229502	-0.4148	-0.564135	-0.294877	-0.625154	-0.620039	-0.416909	-0.547898	-0.245938	-0.0201051	-0.534133	-0.453752
P06576	ATP5F1B	0.273691	0.32072	0.254407	0.0953107	0.376506	0.342661	-0.0892297	0.309983	0.122589	0.357543	0.179532	0.178798	0.497929	0.262586	0.140937	0.34538	0.0793573	0.0583466	0.103995	0.501604	0.348813	0.316146	0.202508	0.339733	0.662963	-0.147943	0.267175	0.157564	0.211686	0.315287	0.393064	0.0793378	0.122483	0.241563	0.426121	0.206416	0.234253	0.245407	0.326457	0.167739	0.181675	0.370239	0.390312	0.36795	0.0546437	0.125084	0.233745	0.737236
P06681	C2	-0.914506	-0.800001	-0.48046	-0.812125	-0.965469	-0.890177	-0.956068	-0.847519	-0.873992	-0.92703	-0.904291	-0.674753	-0.936257	-0.790006	-0.923365	-0.912166	-0.761417	-0.920998	-0.723699	-0.97097	-0.685551	-0.552465	-0.9538	-1.14451	-0.180466	-1.15151	-0.98825	-0.868097	-0.627243	-0.865548	-1.17264	-0.809936	-1.03183	-0.834898	-0.826265	-0.710605	-0.794423	-0.895454	-0.939878	-0.681334	-0.685403	-0.702366	-0.827471	-1.00307	-0.826243	-0.583139	-0.680575	-0.892289
P06702	S100A9	-0.916377	-0.86385	-1.31241	-0.83658	-0.633087	-0.876968	-0.575683	0.302508	-0.748058	-0.770575	-0.263123	-1.26276	-0.846042	0.0974373	-0.134722	-1.00532	-1.0233	-0.451362	-0.890902	-0.831961	-1.36575	-1.52845	-2.05026	-1.01557	-0.686522	-0.363403	-1.82943	-2.20601	0.532189	-0.962844	-1.71904	-1.65211	-1.76015	-0.884082	-0.875953	-0.96563	-0.824936	-0.820214	-1.12687	-1.01759	-1.32105	-1.00627	-1.26515	-1.08146	-0.061863	-0.518772	-0.929465	-0.409399
P06703	S100A6	-1.216	-0.704211	-1.59969	0.528015	-0.569946	-0.768903	-0.288446	0.436871	-0.059885	-1.25234	-0.648272	-1.11446	-0.511409	-1.39979	0.141797	-0.450411	-0.690434	-0.516938	0.645939	-0.625862	-1.10887	-0.479292	-1.15915	-0.0315004	-0.984758	-0.494874	-0.186866	-0.0076523	-0.312055	-0.553317	-0.264197	-0.735736	-0.440708	-0.382148	-0.553011	-0.732668	-0.668042	-0.771578	-0.293051	-2.04594	-0.750846	-0.852903	-0.586524	-0.149411	-0.190678	-0.628365	0.0696826	-0.356113
P06727	APOA4	-0.632548	-0.401526	-1.07573	-0.979856	-1.44727	-0.763211	-0.675296	-1.4583	-1.06942	-0.876135	-0.990623	-1.2877	-1.08976	-1.01906	-0.869494	-1.18654	-0.617359	-1.31763	-1.06766	-1.4251	-1.00185	-1.26537	-1.17497	-1.3466	-0.276963	-1.15151	-0.925295	-0.38923	-1.33367	-0.622939	-0.82766	-0.143834	-0.737992	-0.828133	-0.956747	-1.2085	-0.709454	-1.15813	-0.734648	-1.04898	-1.22232	-1.14494	-0.950577	-1.60768	-1.64641	-1.64729	-1.21297	-1.17867
P06730	EIF4E	-0.0923212	0.205331	0.197839	0.336536	0.300963	0.0784602	-0.0157505	0.0862576	0.249412	-0.0731613	0.134026	0.21195	0.0746866	-0.107938	-0.191565	-0.230696	-0.256327	-0.236708	-0.335675	0.756701	0.311477	0.275276	0.330478	0.22685	0.24257	0.0278673	0.170268	0.239572	0.11101	0.367332	0.288053	0.547243	0.178353	-0.526372	-1.33971	0.730581	0.558615	0.341128	0.481456	-0.196063	0.256162	0.582184	-0.0775985	0.16737	-0.347561	-0.407067	-0.415848	0.184252
P06733	ENO1	-0.295929	-0.376984	-0.185849	-0.214686	-0.642183	0.0257175	-0.517947	-0.175571	0.185192	-0.757552	-0.282374	-1.02971	-0.064471	-0.345813	-0.305413	-0.411257	-0.112036	-0.160114	-0.462024	-0.21774	-0.465597	-0.847923	-0.252289	-0.611186	0.0409973	-0.585763	-0.374274	0.0341504	-0.624412	-0.755044	-0.173874	-0.224695	-0.199373	-0.0734191	-0.198459	0.759852	0.0883532	-0.159239	-0.344452	-0.0553241	-0.318323	0.0981714	-0.242671	-0.805915	-0.356731	-0.321952	0.0730158	-0.771596
P06737	PYGL	0.0602969	-0.372698	0.725565	0.253379	0.362842	1.07769	0.876111	0.151692	0.0932806	0.91915	0.607413	1.0356	-0.636619	0.330863	-0.536824	0.694488	0.474751	0.441764	0.702661	0.431858	-0.152649	0.93867	0.866933	-0.255663	-0.239486	-0.464236	0.554798	-0.0919378	-0.0408947	0.433165	-0.613642	0.778238	0.387626	0.519529	-0.129837	0.492832	0.221391	0.702862	0.581289	0.30851	0.13875	0.765199	-0.60078	0.19516	1.25782	0.599038	1.01352	-0.794139
P06744	GPI	-0.0125076	0.438859	0.177098	0.20074	-0.0477115	-0.0913708	-0.158951	0.376848	0.474618	-0.245137	-0.0519233	0.199992	-0.0126738	0.206483	0.301586	-0.159252	0.284829	0.221884	0.167394	-0.0693007	0.0351771	-0.0395871	-0.0508	-0.0340648	0.479316	0.0383445	-0.00039697	0.124369	-0.304543	0.00640092	0.171699	0.252747	-0.0288902	0.0261619	-0.00963744	0.570351	0.348206	0.226756	0.141843	-0.183233	0.0811741	0.472253	0.107255	0.0508441	0.256524	0.0779483	-0.00880857	0.246466
P06746	POLB	0.0515506	0.172317	-0.0109823	0.170778	0.102637	0.189506	-0.0434387	0.111937	-0.0594869	0.0972056	-0.101804	0.022334	0.123879	0.280763	0.22291	0.00859409	0.0973307	-0.139891	0.151346	0.0986803	0.090753	0.0446468	0.00281453	-0.00732484	0.362046	0.00215185	0.0110931	0.0229908	0.000326302	0.225773	0.235839	0.2593	0.264273	0.321729	0.526627	0.0975014	0.296258	0.0501291	-0.281285	0.521081	-0.463011	0.100501	0.206695	0.128595	0.161695	0.2231	0.0470678	0.490111
P06748	NPM1	0.562431	0.333358	0.569839	0.752567	0.85811	0.544739	0.483738	0.31887	1.07677	1.01725	0.525854	0.321829	0.952515	0.472206	0.515948	0.65483	0.826511	1.08392	0.581166	0.773606	0.645411	0.155908	0.656219	1.05803	-0.372285	0.873586	0.849456	0.549052	0.644017	0.829977	0.846749	0.690768	0.709212	0.771845	0.611634	0.231327	0.951241	0.721986	0.670716	0.792199	0.744573	0.749649	0.738169	1.21885	0.692957	0.256605	0.468541	0.71299
P06753	TPM3	-0.125258	-0.0376392	-1.34712	0.0190116	0.244672	-0.0347429	0.223968	0.332398	-0.0978217	0.127667	-0.293716	0.193233	-0.465911	-0.319491	-0.306033	-0.144193	0.287449	0.276137	0.304427	0.36897	0.18873	0.780807	0.119254	0.124001	-0.736161	0.0319036	0.0019144	-0.123913	0.606293	0.343738	0.0491015	-0.161131	0.013463	0.264691	-0.153883	-0.421564	0.0943411	0.231996	0.313712	0.0918569	-0.314123	0.100867	-0.751617	0.431926	0.0668783	-0.433269	0.387301	0.161113
P06756	ITGAV	-1.06857	-0.697267	-0.918997	-0.765707	-0.605867	-0.714071	-0.614371	-0.276072	-0.630131	-0.867082	-0.760918	-0.402132	-0.816528	-0.84794	-0.94616	-0.97168	-0.911654	-0.80274	-0.795272	-0.692504	-1.03646	-0.283789	-0.682122	-0.881108	-0.865765	-1.23542	-1.01438	-0.903976	-1.39777	-0.907855	-0.691702	-0.961459	-0.932681	-0.728084	-0.749088	-1.30592	-0.805021	-0.825053	-0.921697	-0.359239	-0.543027	-0.787757	-0.629211	-0.766813	-1.00949	-0.553624	-0.886095	-0.9144
P06865	HEXA	0.21448	0.325021	-0.27492	1.08959	0.0517919	0.340358	0.316461	0.841727	-0.175225	-0.0503828	-0.0927337	1.11282	0.276993	0.348516	0.183774	0.732838	0.586774	0.79534	0.880847	0.550577	0.732508	0.725773	0.319882	-0.358424	0.50695	0.580878	0.408687	0.147561	0.0462689	0.964009	-0.345374	0.867478	-0.0820638	0.0660067	0.70628	-0.103987	0.251207	-0.0518885	0.951315	-0.119259	0.553594	0.156571	-0.00722998	0.530041	0.206612	1.00098	1.08335	0.468841
P07093	SERPINE2	0.169839	0.655188	-0.0209174	1.11004	0.586676	-0.115203	-0.166461	1.00041	0.0437583	0.278474	-0.128309	0.939967	-0.186315	-0.124008	-0.0219887	0.0305146	0.119756	-0.0735775	1.13871	0.154014	0.390961	0.528744	0.209728	0.72983	1.44199	0.703384	0.45215	0.062967	-0.236432	0.528074	-0.285402	0.219403	0.297349	-0.0271014	0.917854	0.453586	1.00969	-0.0220787	0.801369	0.138325	1.36078	-0.0928527	0.09679	1.66272	0.271637	0.275084	0.525294	0.660375
P07099	EPHX1	-0.854305	-0.390345	-1.32036	-0.277456	-0.648276	-0.58682	-0.0908393	0.178237	-0.668432	-0.380067	-0.400301	0.397128	-0.998942	-1.15623	-1.1028	-0.57441	-0.0841047	0.0232807	-0.258066	-0.274956	-0.064392	0.160243	-0.528314	-0.232588	-1.09997	-0.167825	-0.837841	-0.20303	-0.644417	-0.170684	-0.616385	-0.39494	-0.812617	-0.651174	-0.689254	-0.0412515	-0.758997	-0.842986	-0.0578632	-0.816157	-0.241737	-0.0354788	-0.84457	-0.461737	-0.370715	0.328168	-0.0652494	-0.474968
P07108	DBI	-0.693609	-0.589815	-0.775988	-0.599932	-0.642183	-0.00780114	-0.0674724	-0.651863	-0.585268	-0.607469	-0.551602	-0.640301	-0.382892	-1.98491	-0.801758	-0.48493	-0.397538	-0.360189	-0.545456	-0.519211	-0.516338	-0.820597	-0.630485	-0.714835	-0.907419	-0.684261	-0.569748	-0.39869	-0.542595	-0.665436	-0.717805	-0.538433	-0.415209	-0.447287	-0.504827	-0.269573	-0.548842	-0.497629	-0.170714	-0.858531	-1.27571	-0.546381	-0.445316	-0.650421	-0.444776	-0.50209	0.179262	-0.546825
P07195	LDHB	0.413242	0.457648	0.594257	0.243051	0.448682	0.497969	0.555404	-0.00485618	0.355616	0.0406943	0.246337	0.359147	0.352182	0.339182	0.272441	0.36596	0.541555	0.741985	0.242761	0.542135	0.0369384	0.429413	0.156183	0.570795	0.441548	0.66562	0.281683	0.544977	-0.175171	0.280047	0.403143	0.534049	0.179767	0.366325	0.140027	0.217634	0.122289	0.412204	0.375779	0.253403	-0.140435	0.746217	0.587785	0.0308505	0.40465	0.231969	0.0863568	0.427853
P07196	NEFL	-0.071341	-0.0714452	-0.0705412	-0.0720964	-0.0721662	-0.0722391	-0.0722065	-0.0726154	-0.0718019	-0.0710434	-0.072789	-0.0713537	-0.0705533	-0.0704325	-0.0710548	-0.0713588	-0.0713768	-0.0722234	-0.0711924	-0.0705648	-0.0705155	-0.0709777	-0.0720632	-0.072483	-0.0735226	-0.0722858	-0.0666033	-0.0683238	-0.0740938	-0.0712652	-0.0701293	-0.0708997	-0.0700396	-1.55175	-1.79817	1.66795	-2.03113	-0.0710484	-0.072427	-0.0696482	-0.0732392	-0.0716616	-0.0720372	-0.0713852	-0.0714106	-0.0723681	-0.0719338	-0.070381
P07197	NEFM	-0.071341	-0.0714452	-0.0705412	-0.0720964	-0.0721662	-0.0722391	-0.0722065	-0.0726154	-0.0718019	-0.0710434	-0.072789	-0.0713537	-0.0705533	-0.0704325	-0.0710548	-0.0713588	-0.0713768	-0.0722234	-0.0711924	-0.0705648	-0.0705155	-0.0709777	-0.0720632	-0.072483	-0.0735226	-0.0722858	-0.0666033	-0.0683238	-0.0740938	-0.0712652	-0.0701293	-0.0708997	-0.0700396	-0.844717	-0.859835	1.13557	-1.23856	-0.0710484	-0.072427	-0.0696482	-0.0732392	-0.0716616	-0.0720372	-0.0713852	-0.0714106	-0.0723681	-0.0719338	-0.070381
P07203	GPX1	0.440559	0.0568195	0.228529	0.0627832	-0.105145	-0.137148	-0.0766218	-0.0774336	0.0837343	-0.230547	-0.189004	0.109846	-0.554556	-0.0834521	0.209349	0.336253	0.200611	0.285202	0.136778	0.220605	0.18376	0.538909	-0.0767541	-0.476425	0.201621	0.0704214	0.516981	-0.297682	0.494123	-0.166623	0.339406	0.192251	0.17732	0.0402068	0.140884	-0.466066	-0.0406948	0.0538499	-0.0362419	0.150011	-0.080404	-0.202884	0.108968	-0.0570489	0.637779	0.0596636	0.390461	-0.229362
P07237	P4HB	-0.25945	-0.147136	0.0960593	0.480046	-0.0586759	0.092279	0.251965	0.563458	0.0856214	0.110636	0.0260088	0.552134	0.120291	-0.0431714	0.0284365	0.0983849	0.136161	0.475964	0.240392	0.0742547	-0.0851303	0.233698	0.0609379	-0.175301	0.379508	0.346146	0.0510343	-0.153696	0.243535	0.540175	-0.136113	0.457467	0.106757	0.0683294	-0.191507	0.170867	-0.074364	0.20335	0.122541	-0.143877	0.127208	0.309481	0.0986878	-0.146745	0.417543	0.652724	0.182622	-0.0488997
P07305	H1-0	0.0934515	1.21218	0.435358	0.873847	-0.134437	0.38059	0.624823	0.499244	0.717617	-0.90305	0.575751	-1.07954	0.193496	0.763031	0.839681	0.0235514	0.268191	-0.424628	0.511997	-0.165941	-1.61854	-0.448126	0.602494	0.272146	-2.09961	-1.08993	0.275701	0.522351	-0.100965	-1.16099	1.22071	-0.420438	1.03986	-0.189282	0.464291	-1.05984	0.722174	1.38398	0.483371	0.425788	0.931288	0.350888	0.56505	-0.659923	0.529219	0.0218092	0.923791	-0.87539
P07320	CRYGD	-0.797749	-0.785409	-0.231543	-0.65247	-0.0721662	-0.0722391	-0.0722065	-0.0726154	-0.0718019	-0.0710434	-0.072789	-0.0713537	-0.0705533	-0.0704325	-0.0710548	-0.0713588	-0.0713768	-0.0722234	-0.0711924	-0.0705648	-0.0705155	-0.0709777	-0.0720632	-0.072483	-0.0735226	-0.0722858	-0.0666033	-0.0683238	-0.0740938	-0.0712652	-0.0701293	-0.0708997	-0.0700396	-0.0667255	-0.0654228	-0.0757322	-0.0653662	-0.0710484	-0.072427	-0.0696482	-0.0732392	-0.0716616	-0.0720372	-0.0713852	-0.0714106	-0.0723681	-0.0719338	-0.758965
P07339	CTSD	-0.780874	-0.776584	-0.661455	-0.501822	-0.845623	-0.517226	-0.978029	0.658897	-0.784121	-0.298294	-0.844217	0.328142	-0.684548	-0.673244	-0.997538	-0.414366	-0.811865	-0.427891	-0.365225	-0.214395	-0.675814	-0.190014	-1.32921	-1.96794	-1.23175	-0.975581	-0.70841	-1.15571	-0.974647	-0.51509	-0.492713	-0.794935	-1.00554	-0.620576	-0.721008	-1.25642	-0.889957	-0.879002	-0.662537	-0.312524	-0.866723	-0.503144	-0.795977	-0.3905	-0.475376	-0.0889063	-0.455317	-0.372355
P07355	ANXA2	-0.202465	-0.441765	-0.200821	0.00644231	0.210459	0.0268831	0.383034	0.337495	-0.0919554	0.124931	0.109223	0.690338	0.275461	0.139494	0.149638	-0.13991	0.0237173	0.223885	0.476346	0.229876	-0.0213653	0.154906	0.0997627	0.249496	-0.261852	0.0669839	-0.129532	-0.0467284	0.191729	0.149352	-0.146234	-0.0364726	0.152182	0.289671	-0.113542	-0.567038	-0.0417068	0.0133927	0.106612	-0.348691	0.223176	0.125462	-0.258746	0.263028	0.0914493	0.108959	0.0753044	-0.163255
P07357	C8A	-1.05675	-1.01995	-0.498165	-0.954148	-0.892281	-0.858209	-0.714925	-0.733218	-0.878746	-0.985996	-1.01998	-0.711415	-1.12066	-0.637661	-0.924338	-1.04462	-0.883377	-0.970788	-0.87173	-1.06656	-0.774612	-0.283789	-0.866004	-0.988613	-0.284343	-1.05495	-1.16458	-0.981199	-1.15945	-0.776292	-1.04273	-0.902948	-0.836282	-0.871462	-0.796893	-1.02438	-0.916137	-0.850225	-0.915702	-0.477484	-0.792356	-0.899239	-0.864899	-0.916521	-0.715237	-0.665145	-0.746127	-0.928107
P07358	C8B	-1.23075	-1.13555	-0.678134	-0.958064	-0.960787	-0.907557	-0.903763	-0.981949	-0.961521	-0.894041	-1.04147	-0.836962	-1.10209	-0.699311	-0.846054	-1.17278	-1.02856	-1.10459	-1.09832	-0.992591	-0.635936	-0.12447	-0.80506	-0.963442	-0.428334	-1.01972	-1.3982	-1.09822	-1.25643	-1.12345	-1.01394	-1.0577	-0.998814	-0.971406	-0.859835	-1.35478	-0.846994	-0.750612	-0.636928	-0.606216	-1.07284	-1.07761	-0.917144	-1.00738	-0.83517	-0.662933	-0.991069	-0.860915
P07360	C8G	-0.644893	-0.687841	-0.194509	-0.236809	-0.431111	-0.599109	-0.402873	-0.232987	0.0779592	0.0268849	0.317286	0.175706	-0.134534	-0.37319	-0.44801	-0.0287601	0.335466	0.350379	0.0873276	-0.593133	-0.332853	-0.540003	-0.508733	-0.335493	-0.147221	-0.538644	-0.37698	-0.46078	-0.305691	-0.0712652	-0.0701293	-0.0708997	-0.0700396	-0.0667255	-0.0654228	-0.0757322	-0.0653662	-0.19339	-0.163168	-0.28565	-0.708149	-0.67288	-0.486652	-0.959915	0.292848	-0.796447	-0.576341	-0.771596
P07384	CAPN1	-0.0674477	0.107554	0.104746	0.0500178	0.0343395	-0.0115942	0.135381	0.252304	0.231761	-0.056521	0.0954403	0.28863	-0.0662926	0.0689438	0.0445471	0.0341126	0.0518856	0.141871	0.166676	0.302203	0.352989	0.36144	0.156183	-0.100552	0.0513935	-0.0838869	-0.135097	-0.0115264	0.0181742	-0.0467075	0.00209007	-0.0408238	0.0143581	-0.0145521	-0.111941	0.0950294	-0.0778436	-0.0377313	-0.140585	0.00478124	0.0498572	0.099598	-0.0194458	0.113262	0.00763351	0.0720464	-0.133068	-0.0554423
P07437	TUBB	0.0813551	-0.0414954	0.236783	0.172921	0.105562	0.211396	0.106043	-0.0954542	-0.0470371	0.302552	-0.0336961	0.0201104	0.113376	0.0515704	0.48178	-0.0120345	0.241972	0.184846	0.0780062	0.192654	0.649355	0.072338	0.628763	0.262001	-0.410221	0.595817	0.285437	0.49619	0.428044	0.174719	0.166493	-0.0122335	0.460796	0.409247	0.229904	0.834495	0.354099	0.165446	0.403125	0.0197184	0.405348	0.037889	0.361519	0.355102	0.0191309	0.80235	0.359543	0.0425557
P07477	PRSS1	-0.376511	-0.685288	-0.335312	-0.705643	-0.406797	-0.539155	0.0713327	-0.32189	-0.422329	-0.0339735	-0.308897	-0.0244873	-0.273061	-0.37591	-0.398113	-0.236259	-0.145146	-0.159946	-0.198504	-0.207658	-0.00881784	-0.0837232	-0.506715	-0.104072	-0.115886	-0.388514	-0.633415	-0.81604	-0.772723	-0.203771	-0.501912	-0.315057	-0.361592	-0.169586	-0.204946	0.0737071	-0.217238	-0.334996	-0.151797	-0.306919	-0.0696968	-0.144082	-0.524957	-0.430905	-0.390907	-0.842697	-0.527114	-0.639679
P07585	DCN	-0.51685	-1.80503	-1.70031	-0.486515	-0.832345	-1.2163	-0.882612	-0.825696	-1.54091	-1.11286	-1.5923	-0.705715	-1.13623	0.111579	-0.411066	-1.4416	-1.54786	-1.30954	-1.62371	-1.08508	-0.428559	0.461581	-0.916479	-1.18342	-0.77842	-1.17681	-1.34189	-1.04312	-1.36711	-1.44612	-0.992008	-1.36812	-1.39812	-1.18892	-1.23879	-1.38709	-1.28116	-1.40959	-1.42039	-0.605993	-0.953035	-1.23331	-1.08834	-1.93994	-1.38422	-1.6323	-1.08435	-0.659441
P07602	PSAP	-0.786377	-0.383438	-1.21539	-0.0586808	-0.618063	-0.489534	-0.309417	-0.989197	-0.0632707	-0.457984	-0.348306	0.0961086	-0.312247	-0.966941	-0.61944	0.257327	-0.735531	0.0892631	-0.519279	0.122821	-0.426524	-0.362505	-1.25326	-1.0879	-0.744418	-0.363403	-0.310558	-0.616097	-0.377576	-0.0242532	-0.295619	-0.739518	-0.500952	-0.295389	-0.363879	-1.10351	-0.768257	-0.348924	-0.33676	-0.89493	-1.25892	-0.275603	-0.443753	-0.213661	0.266432	-1.31838	0.154652	-0.159372
P07686	HEXB	0.014614	0.0255713	-0.500896	1.0143	0.316481	0.135277	0.104006	0.870229	-0.26194	-0.159407	0.0798446	1.51799	-0.0560664	0.02978	-0.117459	0.899895	0.462437	0.588228	1.06987	0.418215	0.496787	0.625132	0.394278	0.29489	0.343766	1.16884	0.225179	0.0602838	0.169646	1.03986	-0.441567	0.852152	-0.310075	-0.215832	0.334928	0.0242739	0.275878	-0.1794	0.878481	-0.117021	0.661066	0.296812	-0.275473	0.7391	0.308553	0.988594	1.2241	0.751808
P07711	CTSL	0.044677	0.19121	-0.17631	0.128645	0.138744	0.0100498	0.521015	1.23469	-0.0816183	-0.266474	0.0403299	-0.0082194	0.651309	0.227453	0.56167	-0.13991	-0.0801748	-0.00673018	0.017342	0.0223843	-0.0737774	0.0365139	-0.126751	0.236706	-0.0257781	0.214674	0.595017	-0.0645867	0.721073	0.0250977	0.0270523	0.15474	-0.0139366	0.216347	0.147888	0.110532	0.21815	0.293217	0.303535	-0.275916	0.0462131	-0.500185	-0.0948003	0.0775297	-0.0714106	-0.0723681	-0.0719338	-0.165219
P07737	PFN1	0.4458	0.168614	0.304254	0.357157	0.310343	0.375954	0.431014	0.217836	0.459926	0.313823	0.19617	0.476547	0.532765	0.731667	0.681799	0.509287	0.518319	0.363002	0.605279	0.604787	0.353526	0.698284	0.546315	0.446827	0.311149	0.577695	0.412355	0.201193	0.892693	0.712238	0.592996	0.841166	0.647814	0.229434	0.251941	0.145017	0.315626	0.489036	0.47375	0.657816	0.582265	0.384589	0.449006	0.680816	0.527112	0.680094	0.449697	0.349225
P07738	BPGM	-0.0493135	-0.1964	-0.119466	-0.00481001	-0.496072	-0.457042	-0.269784	-1.11748	-0.151314	-0.159054	-0.0165469	-0.323248	-0.436367	-0.436065	-0.584379	-0.418057	-0.322641	-0.376078	-0.108261	-0.274224	-0.327708	-0.269274	-0.526439	-0.246652	-0.198799	-0.350496	-0.269393	-0.0826773	-0.00741666	-0.246076	-0.460695	-0.480819	-0.288983	-0.286472	-0.401122	0.396909	-0.114377	-0.365668	-0.200615	-0.204136	-0.157501	-0.356572	-0.209078	-0.0192612	0.223725	-0.000318876	0.264374	-0.116087
P07741	APRT	0.153112	0.0981066	0.271386	0.0592606	0.0041703	0.180711	0.0363246	-0.0211702	0.0263461	-0.546515	-0.0283797	-0.144662	0.19931	0.424468	0.224269	0.427236	0.20233	0.402513	0.382606	-0.365939	0.0160895	-0.503802	0.187109	0.000611855	0.476774	0.352092	0.146234	0.36228	0.0392538	0.24079	-0.0042342	0.0864926	0.0737453	0.296601	0.58917	-0.177458	0.345422	0.0552243	-0.0897309	-0.107172	-0.158795	0.417291	0.614199	-0.243069	0.102445	0.20303	-0.258254	-0.169198
P07814	EPRS1	0.080176	-0.107263	-0.0377661	-0.143582	0.10297	0.146286	0.076313	-0.104742	0.0698653	-0.0876075	0.155362	-0.0968698	0.320915	0.0805676	0.239416	0.100464	0.0220684	-0.00337822	-0.0560883	0.0314689	0.195753	-0.0894083	0.0427172	0.346606	-0.148992	0.261182	0.200934	0.244247	0.0462689	0.0562908	0.146929	-0.00348193	0.217006	0.273641	0.145865	-0.209124	0.0254831	0.0552243	-0.0701923	0.348602	-0.0477873	0.177576	0.308085	0.216365	0.195032	0.134066	-0.00124257	0.0721669
P07858	CTSB	-0.261038	0.24322	-0.623281	-0.194772	-0.152004	-0.452245	-0.0432078	1.07788	-0.451156	0.451936	-0.515607	0.751306	-0.183763	-0.0571685	-0.229826	0.186899	0.233876	0.475964	0.51101	0.177184	0.233795	0.248373	-0.107512	-0.711401	-0.246376	0.38161	-0.145759	-0.184989	0.00606607	-0.201848	-0.355694	-0.06407	-0.285205	-0.00110604	0.0726839	0.299209	0.0665855	-0.2701	0.0259747	-0.241347	-0.132917	0.0114465	-0.257007	0.487299	0.181867	0.872227	0.700474	0.124524
P07900	HSP90AA1	0.313588	0.264241	0.31677	0.419259	0.029962	0.242254	0.264043	0.0328827	0.218645	0.263763	0.223767	0.237034	0.353803	0.219224	0.340076	0.372188	0.244293	0.20721	0.308222	0.398061	0.265502	0.0684258	0.24851	0.438983	0.210427	0.481806	0.406147	0.144671	0.0748984	0.27693	0.208657	0.358178	0.286278	0.462058	0.0795014	0.368586	0.276805	0.339944	0.334491	0.18661	0.266639	0.180795	0.272794	0.4344	0.356907	0.484208	0.316976	0.251925
P07902	GALT	-0.071341	-0.0714452	-0.0705412	-0.0720964	-0.092924	0.0110123	0.237685	-0.0436049	-0.490518	-0.405708	-0.438778	-0.322612	-0.177942	-0.210299	-0.176382	0.244476	0.0822647	0.0540056	-0.070379	0.0373813	0.032131	-0.148383	0.0718061	0.246443	0.0722772	0.168752	0.10574	0.0578099	0.00813643	-0.199373	-0.112032	0.226745	-0.120491	0.00131991	0.0153393	-0.28268	-0.288515	-0.309127	-0.116373	0.0566324	-0.0505202	0.169103	0.0986878	0.279942	-0.0353235	0.104326	0.227522	-0.070381
P07910	HNRNPC	0.216865	-0.0347326	0.114462	0.321877	0.251296	0.0620229	0.124347	0.098199	0.147472	0.157628	0.246337	0.0379751	0.421764	0.468507	0.430998	0.0836107	0.220712	-0.0044199	0.00147294	0.275219	0.410935	0.0177033	0.41305	0.15186	-0.491709	0.1386	0.289566	0.289487	0.402174	0.133365	0.115577	0.0750472	0.195829	0.195168	0.337802	0.130562	0.284329	0.276626	0.30932	0.48282	0.403497	0.264318	0.277883	0.27302	0.256524	-0.128569	0.255375	0.125947
P07919	UQCRH	0.0483481	0.343608	0.299267	0.40553	0.123345	0.511374	0.356369	0.519981	0.186073	-0.216367	0.471254	-0.480941	-0.0282568	0.726127	-0.131658	0.349585	0.191359	0.247398	0.253831	0.641653	0.867944	-0.208679	0.219862	0.105847	0.0422881	0.322468	0.393624	-0.0579407	-0.195652	-0.048642	0.523609	-0.116207	0.184798	0.385207	1.11568	-0.490533	-0.0292411	0.597596	0.904656	0.380224	0.203957	0.368512	0.591038	0.343165	0.102637	0.0425474	0.0717029	0.723624
P07942	LAMB1	-1.30861	-1.41656	-1.37716	-0.992024	-0.808248	-0.864355	-0.922657	-0.29803	-1.45527	-1.2011	-1.44612	-0.476635	-0.783082	-0.98596	-0.997538	-1.47733	-0.512617	-0.968885	-1.33182	-0.984323	-0.00519346	-0.227695	-0.999613	-0.715128	-0.466446	-0.43124	-1.07999	-1.00431	-1.077	-0.902269	-0.862552	-1.30519	-1.10113	-1.20357	-0.370253	-1.54092	-0.983254	-1.34422	-1.02015	-0.302479	-0.296243	-0.826704	-1.15988	-0.778553	-0.773296	-0.834281	-0.611321	-0.87934
P07948	LYN	-0.071341	-0.0714452	-0.0705412	-0.0720964	-0.0721662	-0.0722391	-0.0722065	-0.0726154	-0.0718019	-0.0710434	-0.072789	-0.0713537	-0.0705533	-0.0704325	-0.0710548	-0.0713588	-0.0713768	-0.0722234	-0.0711924	-0.0503424	0.0298839	0.460637	-0.0720632	-0.072483	-0.0735226	-0.0722858	-0.0666033	-0.0683238	-0.0740938	-0.0712652	-0.0701293	-0.0708997	-0.0700396	-0.0667255	-0.0654228	-0.0757322	-0.0653662	-0.0710484	-0.072427	-0.0696482	-0.0732392	-0.0716616	-0.0720372	-0.0713852	-0.0714106	-0.0723681	-0.0719338	-0.070381
P07951	TPM2	0.238897	0.478049	0.301586	0.166402	0.0853732	0.0205139	0.214866	0.26284	0.0152773	0.0410051	-0.139181	0.610272	-0.0173591	-0.0275457	0.044128	0.0176598	0.193963	0.178071	0.13122	0.0878249	-0.13312	-0.125537	0.137126	-0.435292	-0.317064	-0.614463	-0.689111	-0.298917	-0.375846	0.0126176	0.095921	0.0930811	0.104169	0.118804	0.149737	0.183632	0.116398	0.117994	0.114769	-0.0696482	-0.0732392	-0.0716616	0.0027549	0.991779	0.0847095	0.0646837	-0.0198694	-0.0875389
P07954	FH	0.113609	0.33031	0.117535	-0.139768	0.320292	0.439822	0.0792814	0.215349	0.205399	0.205888	0.533981	0.119573	0.446634	0.301151	0.233094	0.210482	-0.2332	-0.0687427	0.0296615	0.0141788	0.279107	0.00891789	0.0278903	0.453234	0.111099	0.242691	0.226199	0.420758	0.095135	0.108412	0.167065	-0.114515	0.114571	0.176565	0.146554	-0.027775	0.168764	0.220968	-0.0458454	-0.0839598	-0.156591	0.14037	0.245468	0.228967	-0.203992	0.0640177	-0.0681212	0.987189
P07996	THBS1	-0.071341	-0.0714452	-0.0705412	-0.0720964	-0.0721662	-0.0722391	-0.0722065	-0.0726154	-0.0718019	-0.0710434	-0.072789	-0.0713537	-0.0705533	-0.0704325	-0.0710548	-0.0713588	-0.0713768	-0.0722234	-0.0711924	-0.0705648	-0.0705155	-0.0709777	-0.0720632	-0.072483	-0.0735226	-0.0722858	-0.0666033	-0.0683238	-0.0740938	-0.0712652	-0.0701293	-0.0708997	-0.0700396	-0.0667255	-0.0654228	-0.0757322	-0.0653662	-0.0710484	-0.072427	-0.0696482	-0.0732392	-0.0716616	-0.0720372	-0.683678	-0.0714106	-0.0723681	-0.0719338	-0.070381
P08069	IGF1R	-0.071341	-0.0714452	-0.0705412	-0.0720964	-0.0994642	-0.200588	-0.230973	0.228325	-0.389401	-0.171894	-0.274183	0.277208	-0.309545	-0.578869	-0.546797	-0.200772	-0.233677	-0.205938	-0.207424	-0.464936	-0.354108	-0.339043	-0.593603	-0.233983	0.578975	-0.316972	-0.603409	-0.425684	-0.334161	0.0814769	-0.269057	0.387525	-0.0454598	-0.528759	-0.580992	-0.515348	-0.0577073	-0.40986	-0.0505568	-0.321503	0.641641	0.104163	-0.892595	-0.16617	-0.0714106	-0.0723681	-0.0719338	-0.070381
P08100	RHO	-1.47827	-1.40332	-0.936671	-1.24561	-1.2503	-0.871663	-0.773886	-0.68705	-0.748058	1.2048	-0.977546	-1.71849	-1.63426	-2.45947	-2.38559	-1.30575	-1.2328	-1.23771	-1.21571	-1.6503	-2.03479	-2.2363	-1.73045	-1.60307	-1.17587	-1.57461	-1.73812	-1.79611	-1.71313	-1.48728	-1.13612	-1.83105	-2.00148	-1.75603	-1.93581	-0.674088	-2.09953	-1.66088	-1.71013	-1.68394	-1.50637	-1.73001	-1.54856	-1.6667	-1.70115	-1.89813	-1.26848	-0.824138
P08133	ANXA6	-0.386157	0.0376195	-0.233798	-0.298573	0.18011	-0.216444	0.0347566	0.0807322	-0.170539	-0.177381	0.147849	0.20677	-0.201874	0.119738	-0.219123	-0.104711	0.296982	0.382496	0.0798567	0.197699	-0.0700242	-0.0258927	0.0433599	-0.307093	0.105603	-0.0543827	-0.285602	0.0555831	0.236013	-0.205361	-0.270523	-0.281679	-0.12941	-0.25587	-0.208687	-0.424849	-0.33141	-0.14304	-0.525613	-0.161783	-0.0613473	0.00332458	-0.355439	-0.268288	0.221344	0.135972	0.0977572	-0.325809
P08134	RHOC	-0.138725	-0.0675861	0.152546	0.240978	-0.0651049	0.0125057	0.0446082	0.307071	0.15916	-0.276258	0.222404	-0.0545549	-0.368749	0.111579	0.053879	-0.0504563	-0.102243	-0.0266865	-0.0869922	-0.619003	-0.334733	-0.365638	0.0315026	-0.0262359	0.0486313	-0.0785654	0.114021	0.0661508	-0.232982	-0.0708744	0.0977845	-0.0717933	-0.0670947	0.167514	0.0469148	0.0442352	-0.242387	-0.0283631	-0.254256	-0.147021	-0.310884	0.175018	-0.0914655	-0.162737	0.574983	0.0352405	-0.10898	0.0314202
P08185	SERPINA6	-0.967976	-0.901328	0.0414325	-0.885886	-0.898751	-0.743097	-0.59051	-0.888884	-0.687926	-0.842142	-0.766697	-0.802255	-1.07838	-1.10666	-1.16386	-1.22096	-1.02843	-1.15287	-1.18203	-1.31132	-0.74384	-0.620358	-1.04891	-0.806191	-0.404821	-0.946317	-0.939939	-0.832239	-0.273645	-0.875626	-1.0679	-0.920366	-1.03183	-0.955229	-1.18303	-1.2295	-0.812691	-1.05057	-0.899151	-0.789368	-0.736564	-0.866472	-0.913569	-0.87598	-1.43883	-0.910823	-1.01849	-0.77606
P08195	SLC3A2	0.281283	0.455321	-0.0428824	0.321877	0.181668	0.445513	0.431864	0.129097	0.00100525	0.419684	0.546777	0.212906	0.241554	0.38601	-0.00160097	0.153682	0.374263	0.437217	0.153074	-0.210199	-0.107054	0.0977089	0.52879	-0.093817	0.491747	0.390709	0.471283	0.415935	0.286379	0.347796	-0.00315618	0.706295	0.311908	0.39675	0.125702	-0.300914	0.64377	0.456247	0.305237	-0.170042	-0.0954542	-0.238975	0.342663	0.194024	-0.0638515	-0.00527414	0.0117014	0.187316
P08236	GUSB	-0.386157	-0.187512	-0.194509	0.122785	-0.242171	-0.504909	-0.539142	0.489495	-0.1856	0.345901	-0.0750972	0.882925	-0.216679	-0.39998	-0.198456	0.32232	-0.0634612	0.0720979	0.0288858	-0.348778	-0.220873	-0.415291	0.169616	0.0792744	0.237049	0.524138	-0.285602	-0.332405	-0.0983714	0.523462	-0.876165	0.293602	-0.737992	-0.353675	-0.211913	-0.122749	0.0144186	-0.512226	-0.0578632	-0.17355	0.60368	0.130121	-0.526344	-0.233029	-0.171149	0.213188	0.179262	0.181625
P08237	PFKM	-0.291685	-0.0945787	-0.207973	-0.391102	-0.141595	-0.757256	-0.103559	-0.202578	-0.434038	-0.402853	-0.467638	-0.105534	-0.470988	-0.313342	-0.225193	-0.604155	-0.31736	0.0319586	-0.313777	-0.15314	-0.782921	-0.442308	-0.261705	-0.695768	-0.416884	-0.456833	-0.38809	-0.664797	-0.907157	-0.395276	-0.15587	-0.313557	-0.352992	-0.214668	-0.183963	0.426475	-0.564704	-0.211746	-0.278009	-0.587778	-0.230597	-0.0902565	0.172911	-0.406589	-0.135586	-0.144336	-0.295488	0.135868
P08238	HSP90AB1	0.220355	0.049292	0.436955	0.295889	0.238593	0.293301	0.401536	-0.2298	0.4144	0.409283	0.359525	0.123584	0.483245	0.0575509	0.17776	0.163325	0.204706	0.257807	0.0708408	0.323104	0.613572	0.0794451	0.396102	0.697794	0.280513	0.639634	0.278	0.393872	0.440687	0.0894717	0.0578293	0.149093	0.232159	0.530126	0.592282	0.159573	0.29386	0.212099	0.247271	0.219303	0.327661	0.20751	0.536929	0.241429	-0.0353235	-0.212161	0.0596901	0.193489
P08240	SRPRA	-0.122159	-0.444277	-0.145554	-0.270891	0.429585	0.405544	0.439087	0.253351	-0.468186	-0.198415	-0.73024	-0.388879	0.0794683	-0.11764	0.180883	0.0816845	-0.0996181	0.197209	-0.00998552	0.200502	-0.289116	0.0264997	-0.0877482	0.296588	-0.0853492	-0.0102764	0.485039	-0.158308	0.228359	0.038403	0.310679	-0.308697	0.104819	0.475424	0.123511	0.0827216	0.074361	0.238554	-0.0897309	0.358209	0.260147	0.125462	0.470747	0.0334049	-0.333793	-0.180112	-0.578547	-0.316521
P08246	ELANE	-0.071341	-0.0714452	-0.0705412	-0.0720964	-0.0721662	-0.0722391	-0.0722065	-0.0726154	-0.0718019	-0.0710434	-0.072789	-0.0713537	-0.0705533	-0.0704325	-0.0710548	-0.0713588	-0.0713768	-0.0722234	-0.0711924	-0.0705648	-0.0705155	-0.0709777	-0.0720632	-0.072483	-0.0735226	-0.0722858	-0.0666033	-0.0683238	-0.0740938	-0.0712652	-0.0701293	-0.0708997	-0.0700396	-0.0667255	-0.0654228	-0.0757322	-0.0653662	-0.0710484	-0.072427	-0.0696482	-0.0732392	-0.0716616	-0.0720372	-0.323305	-0.0714106	-0.0723681	-0.0719338	-0.070381
P08294	SOD3	-1.1165	-0.961887	-1.04244	-1.01281	-0.593764	-1.42686	-1.22733	-0.562787	-1.63199	-1.53357	-1.11446	-0.813777	-1.13041	-0.75792	-0.0534686	0.0271171	-1.37393	-0.884912	-0.588887	-1.04424	-1.10887	0.203302	-0.547011	-0.570879	0.879628	-0.753189	-0.909293	-0.802979	-1.67535	-0.160978	-0.746461	-1.15178	-0.521175	-1.19452	-0.412474	-1.45564	-0.919477	-0.93171	-0.942486	-0.681334	-0.706587	-1.08287	-0.643457	-0.664888	-1.27427	-0.456098	-0.912814	-1.0785
P08397	HMBS	-0.0307075	-0.0852007	-0.187475	-0.251453	0.0343395	0.350391	0.0780649	0.905589	-0.526964	-0.30234	-0.0712609	-0.327688	0.0280833	-0.155898	-0.035298	0.128455	0.194497	0.201101	0.344716	-0.431456	-0.90894	-0.897733	-0.259419	-0.0437415	0.305789	0.00535608	-0.0578222	-0.0826173	-0.104487	0.00620639	0.34516	-0.0227229	0.12942	-0.322395	-0.219024	0.0728957	-0.0717391	-0.172888	-0.347216	-0.0696482	-0.0732392	-0.0716616	-0.28022	0.0500619	-0.79505	0.0283451	-0.36939	0.4075
P08473	MME	0.0887171	0.616017	0.326682	0.0232864	0.0194287	0.227078	-0.207081	0.0237121	-0.0263247	0.0457576	-0.204717	-0.171302	0.164482	-0.0313288	0.205228	0.0771095	-0.335793	-0.0443859	0.109109	-0.289921	-0.146696	-0.839731	-0.0366758	1.90946	-0.219697	0.451775	0.037385	0.278629	0.140628	0.477083	0.366093	-0.299111	0.118334	0.550551	-0.269288	0.894393	0.542207	-0.0964751	0.248859	-0.0194066	0.122718	0.811374	0.154132	0.308348	0.22122	0.079774	0.104878	0.389943
P08559	PDHA1	0.196497	0.0376195	0.356072	-0.217297	0.302915	0.442208	-0.0784386	0.079996	0.173347	0.298125	0.313647	-0.264026	0.312932	0.384088	0.168467	0.304962	-0.0445617	0.0714055	-0.0941748	0.152706	0.0369384	0.0212559	0.117855	0.00606186	0.112631	-0.182744	0.304423	0.162815	-0.00105014	0.161043	0.328082	0.0562341	0.186623	0.0924037	0.0857266	-0.339233	-0.168866	0.195484	-0.0423921	0.392517	-0.0375976	0.247621	0.415834	0.076967	-0.18621	-0.0215039	0.0951457	0.0518807
P08567	PLEK	-0.44324	-0.552195	-0.262512	-0.556874	-0.0862124	-0.0995008	-0.078864	-0.131268	0.173296	-0.0216201	0.00416395	0.0406271	-0.254854	-0.170398	-0.241676	-0.719875	-0.684099	-0.530199	-0.554041	-0.420647	-0.12307	0.272797	-0.725106	-0.559353	0.077975	-0.510869	0.28366	0.173985	0.617462	-0.0901177	-0.28741	-0.177329	-0.188004	-0.367939	-0.327491	-0.352059	-0.0818015	-0.961244	-0.493181	-0.215923	-0.722126	-0.417532	0.273738	-0.0845355	0.22686	-0.19875	-0.0763093	-0.363184
P08571	CD14	-0.932073	-0.488964	-0.72851	-0.771776	-0.919155	-0.898127	-0.747108	0.12368	-0.638202	-0.744894	-0.827771	-0.195367	-0.704856	-0.642021	-0.538877	-0.378813	-0.62	-0.141531	-0.358905	-0.133601	-0.482263	0.440296	-0.543737	-0.476425	0.00661393	-0.386149	-0.762287	-0.846668	0.600343	-0.302117	-0.37259	-0.414891	-0.406415	-0.474903	-0.419977	-0.139279	-0.507186	-0.591695	-0.225322	-0.873874	0.206523	-0.617077	-0.514069	-0.90492	-0.132979	0.0106863	0.180513	-0.470282
P08574	CYC1	-0.36733	-0.549677	0.306005	-0.387687	-0.206644	0.263308	-0.0841227	-0.0898843	0.312239	-0.217205	0.64001	-0.480941	0.147446	-0.109745	0.133042	-0.292747	-0.512617	-0.26048	-0.353457	0.307087	0.627564	-0.395931	-0.199884	-0.0488368	0.357877	-0.185605	-0.242914	-0.240658	-0.610899	-0.0609703	-0.288638	0.0489392	-0.377306	-0.288035	-0.0311147	-1.04022	-0.503912	-0.41713	-0.522308	-0.0657581	-0.685403	-0.539109	-0.22686	-0.94201	-0.565776	-1.16301	-1.26085	-0.393764
P08575	PTPRC	-0.071341	-0.0714452	-0.0705412	-0.0720964	0.0107377	0.499059	0.35023	0.577418	-0.577969	-0.204793	-0.638202	0.486659	-0.330355	-0.630593	-0.554038	-0.325865	-0.372646	0.0910154	-0.0272775	0.243094	0.0744569	0.677018	-0.606037	-0.376902	0.242715	-0.155375	-0.363819	-0.427502	1.033	-0.196664	-0.412841	-0.325951	-0.399118	-0.000894374	-0.1883	0.207352	0.097752	-0.666345	-0.424683	-0.127613	0.631629	1.07508	-0.377779	-0.220643	-0.213721	0.378769	0.369407	-0.070381
P08581	MET	-0.144685	0.222513	-0.139713	0.32391	0.0816244	-0.282927	-0.45793	-0.0492649	-0.252917	-0.286086	-0.0441741	0.616614	-0.13414	0.121228	-0.0548967	0.350977	0.41713	0.238473	0.364023	0.117639	0.326016	0.0122563	-0.325934	0.31316	-0.0165648	0.200617	0.0373763	0.157564	-0.426852	0.0575314	0.0195938	0.116322	-0.324964	-0.25587	-0.134748	-0.0699651	-0.17295	-0.291801	0.158478	-0.526923	0.195491	-0.467462	-0.220762	0.300263	-0.184362	0.0566952	0.24609	0.151345
P08603	CFH	-1.09135	-1.1103	-0.51949	-1.02993	-1.05204	-1.63454	-1.04036	-1.3135	-1.12813	-0.83088	-1.2268	-0.578814	-1.16529	-0.897756	-1.02375	-1.16347	-1.28139	-1.14582	-1.14449	-0.950732	-1.26143	-0.482941	-0.845704	-1.15195	-1.59041	-1.32646	-1.08845	-0.786038	-0.846436	-1.26183	-1.13612	-1.04273	-0.944636	-0.800443	-1.22628	-1.78259	-1.22113	-0.792914	-1.1658	-0.526923	-1.22232	-0.927066	-1.14679	-0.947524	-0.176683	-0.88434	-1.03183	-1.16583
P08621	SNRNP70	0.405995	0.285019	0.0397975	0.438409	0.0970666	0.203965	0.280774	0.263692	0.0250689	-0.0369581	-0.0387394	-0.255439	0.149388	0.19483	0.178695	0.186184	0.283266	0.020101	0.00313201	-0.109617	0.155079	-0.273055	0.199635	-0.110444	-0.330143	0.0383445	0.162589	0.216143	0.176233	0.213109	0.0082743	0.344197	0.228097	0.160388	0.167923	-0.112798	0.0698086	0.129563	0.0573081	0.127686	-0.262905	-0.206495	0.133828	-0.131707	0.120509	0.149638	0.200214	0.124524
P08631	HCK	0.245835	0.32713	0.228705	0.584496	0.876395	0.444601	0.999419	0.316995	0.21701	0.364415	0.216956	0.407122	0.154889	0.218621	0.264332	-0.359774	0.158013	0.466039	0.132802	0.339184	0.177895	0.26566	-0.505226	-0.394479	0.754161	0.0433038	-0.354364	-0.230444	0.678853	0.560676	0.270501	0.297949	0.278029	0.277595	0.31379	0.218499	0.195974	0.998505	1.33192	0.395981	1.26664	0.717518	0.0513251	0.433618	0.232862	0.454464	0.491598	0.31758
P08670	VIM	0.00997516	-0.024496	-0.0159937	1.28794	-0.183442	0.496934	0.818786	0.313721	-0.0141338	0.489405	0.0634323	0.626715	0.377206	-0.0305978	0.241684	0.527527	1.00075	1.05681	0.560101	0.346981	-0.222381	0.110417	0.488705	-0.331943	-1.4454	0.510724	0.350938	-0.363039	-0.372793	0.556248	-0.0326465	0.552211	0.214199	0.611811	-0.0294542	0.865969	-0.431929	0.628648	1.29013	0.202206	-0.42504	1.42947	0.18921	-0.139608	1.30022	0.289955	1.25801	-0.532689
P08697	SERPINF2	-0.875121	-0.98077	0.00231855	-0.907185	-1.18958	-0.926177	-1.31823	-0.838647	-1.16277	-1.36748	-1.31079	-1.13781	-1.18283	-1.13649	-1.21408	-1.14645	-1.22051	-1.05652	-1.10558	-1.16083	-0.603189	-0.688598	-1.27592	-0.621481	0.0616678	-0.673478	-1.3751	-1.13631	-0.863094	-0.865548	-1.61369	-0.732395	-1.33676	-1.14791	-1.3755	-1.4159	-0.967651	-0.995079	-0.934758	-1.07595	-1.01456	-1.28346	-1.04591	-0.998607	-1.14805	-0.630466	-0.919417	-0.83834
P08708	RPS17	0.0934515	-0.301034	0.315631	-0.369451	0.356334	0.674794	0.707171	0.0161289	0.494281	0.118341	0.143685	-0.115474	0.78477	0.469867	0.646591	0.551409	0.573922	0.63167	0.295724	0.97983	0.606533	0.399151	0.703137	0.669794	-0.145609	0.484849	0.522932	0.30101	0.0516839	0.376023	0.746893	0.355883	0.973409	0.692442	0.496339	0.00252582	0.339585	0.398929	0.00346984	0.749028	0.288175	0.578835	0.639593	0.10926	0.412645	-0.119678	-0.0549023	-0.136727
P08754	GNAI3	0.865769	0.534362	0.351976	0.116877	-0.0813141	0.0142136	0.463848	0.273668	0.122589	0.299192	0.198864	0.179746	0.0868457	0.497554	0.268476	-0.212078	0.41713	0.171035	-0.152207	0.421716	0.491812	0.65079	0.448754	-0.169277	0.382639	0.357601	0.0386211	0.198341	0.288949	0.154828	0.170208	0.505527	0.235075	0.351677	0.229904	0.0613005	0.585759	0.462058	0.133961	0.305055	0.127208	0.277956	0.32535	0.19278	0.227293	0.169415	0.210891	0.121779
P08758	ANXA5	0.987082	1.40777	0.951854	0.841633	1.11333	1.03658	1.20506	1.01244	1.20489	0.794087	1.64972	0.976285	0.978275	1.34142	1.2336	1.33395	1.38643	1.53656	0.59099	1.90946	0.931762	1.05703	0.615218	0.237026	0.934276	0.389157	1.09601	1.26782	0.700536	1.07816	0.954802	1.11113	0.675747	0.78233	0.738816	0.487801	0.987958	1.00951	1.05539	0.38912	0.796778	1.20336	0.695308	0.425831	0.894124	1.17195	0.785298	0.467186
P08865	RPSA	0.231449	0.0518358	0.389437	-0.0304269	0.0255871	0.501492	0.213571	-0.370663	0.637911	0.421618	0.239446	0.197403	0.675338	0.197684	0.518579	-0.191207	0.44141	0.517197	0.323314	0.717966	0.655502	0.314374	0.327099	0.345534	0.0422881	0.364332	0.606456	0.319957	0.314612	0.0517898	0.444325	0.265984	0.465641	0.543425	0.479004	0.303809	0.66674	0.114431	0.18795	0.230301	-0.0920356	0.28536	0.659606	0.219616	-0.0323044	0.0577516	0.081445	0.169992
P08962	CD63	-0.341268	-0.120467	-0.680932	-0.816213	1.03609	-0.315449	0.306316	0.395751	-0.411861	0.313823	0.286204	0.786443	-0.170831	0.0386251	-0.273891	0.990218	0.330054	0.746604	-0.425368	-0.0257738	0.472974	1.13851	0.137126	-0.335732	-0.376052	0.332571	0.120661	-0.0432912	0.317751	0.557591	-0.189733	0.733754	-0.231543	-0.399385	-0.301967	-0.24971	0.342527	-0.0558266	-0.338573	-0.287294	-0.363988	-0.29969	-0.57999	0.0537008	-0.0407916	0.239726	0.584393	0.419426
P09001	MRPL3	0.49699	0.330767	0.529719	-0.0633821	0.0503499	0.203965	-0.0892246	-0.185968	0.527137	-0.399306	0.52015	-0.158449	0.277774	0.0509189	0.434051	0.429018	0.269723	-0.0481942	0.0913232	0.177184	0.236943	0.0612798	0.32394	0.28551	-0.731561	-0.0347108	0.103106	0.0229328	0.0658609	0.123716	0.364751	0.0276084	0.158055	0.154655	0.159719	-0.279274	0.0637984	0.208446	-0.579471	0.49817	-0.178028	0.0981714	0.115873	-0.206107	0.118936	0.149638	-0.122742	-0.265011
P09012	SNRPA	0.159381	0.179085	0.292677	0.358833	0.0343395	0.0758953	-0.189503	0.240515	0.034975	0.370912	0.130732	0.229927	0.22895	0.188311	0.189301	0.184164	0.113979	0.0988531	0.250653	0.282543	0.319407	-0.0395871	0.148679	0.0953197	-0.234991	0.34295	0.0373763	0.257605	0.208145	0.330508	0.275512	0.316786	0.355216	0.421198	0.529948	0.206416	0.352688	0.189507	0.344985	0.142778	1.00968	0.590584	0.503658	-0.367866	-0.479288	0.0991397	-0.26946	0.263084
P09104	ENO2	-1.62538	-1.03368	-1.62117	-1.61317	-1.88737	-1.81165	-2.13224	-1.2759	-1.6897	-2.07733	-1.58161	-1.85435	-1.20199	-1.34609	-1.32945	-1.6138	-1.10469	-1.47673	-1.72319	-1.12907	-1.88741	-2.0148	-1.81736	-1.53503	-1.73686	-1.68942	-1.84298	-1.41662	-1.76234	-1.85979	-1.1914	-1.51321	-1.69338	-0.771578	-0.873695	0.80555	-0.763001	-1.26256	-1.46529	-1.83411	-1.52994	-1.10213	-1.82449	-1.59657	-1.46248	-1.53017	-1.33351	-1.76849
P09110	ACAA1	-0.808081	-0.571945	-0.401393	-0.588084	-0.788788	-0.421925	-0.687206	-0.333962	-0.518318	-0.480171	-0.501714	-0.668432	-0.381112	-0.288777	-0.324809	-0.370233	-0.41138	0.0714055	-0.420518	-0.408756	-0.267282	-0.270874	-0.306687	-0.30242	0.252817	-0.452214	-0.269154	-0.29029	-0.186391	-0.460978	-0.132415	-0.29849	-0.360177	-0.0903771	-0.144759	-0.431777	-0.543233	-0.363802	-0.479338	-0.254656	-0.298211	-0.587401	-0.162077	-0.734625	-0.331857	-0.246622	-0.324826	-0.748042
P09211	GSTP1	0.395659	0.723831	0.364373	0.0313249	0.948587	1.65058	1.14694	-0.00232234	0.463133	0.402012	1.13433	-0.315325	-0.089271	0.780898	0.246928	-0.236076	1.10028	1.25615	-0.139086	1.53656	1.02215	0.565938	0.46355	0.446827	-0.113238	1.07156	0.0019144	1.13051	0.280169	-0.980751	0.495925	1.28544	0.235075	0.714601	-0.449045	0.473303	0.744841	0.78233	-0.160749	-0.192302	-0.110159	0.316811	0.286057	-0.240403	0.0965212	-0.384945	0.772619	0.794944
P09382	LGALS1	-0.761978	-0.598763	-0.854097	-0.289888	-0.0949531	-0.520437	-0.329713	0.349046	-0.312884	-0.512296	-0.485845	0.755224	-0.829952	-0.593833	-0.513107	-0.995102	-0.705097	-0.232286	0.168706	0.00372603	-0.00427994	0.462632	-0.290553	-0.426688	-0.619373	-0.484308	-0.94682	-0.636836	-0.177353	0.118689	-0.204088	-0.586504	-0.697241	-0.631682	-0.327051	-0.0372539	-0.53784	-0.785253	-0.240974	-0.283014	-0.178028	0.174133	-0.973664	-0.109571	0.429451	0.310727	0.00289424	-0.162171
P09417	QDPR	-0.189871	-0.367844	-0.263247	-0.381978	-0.276237	-0.113287	-0.42772	-0.140912	-0.493102	-0.657953	-0.448639	-0.120606	-0.176285	-0.201207	-0.246185	-0.345784	-0.693864	-0.54789	-0.665895	-0.465934	-0.641464	-0.685486	-0.441569	-0.41928	-0.213538	-0.893385	-0.617125	-0.548112	-0.607036	-0.39873	-0.391764	-0.589764	-0.52407	-0.210768	-0.410929	0.679466	-0.549709	-0.401827	-0.507987	-0.610685	-0.447962	-0.125793	-0.258746	-0.100018	-0.24309	0.316362	-0.665224	-0.294397
P09429	HMGB1	0.189213	0.0480687	0.0686573	0.196067	0.118813	0.229405	0.145872	0.0493583	0.292576	0.0776779	0.219471	-0.423423	0.736611	0.825287	1.05226	-0.172577	-0.0499483	-0.671179	-0.153892	-0.175867	-0.120248	-0.584665	0.364379	0.212936	-0.21578	0.19412	0.0572182	0.103327	0.0130504	0.0864912	0.467129	0.129223	0.724112	0.29891	0.672477	-0.073757	0.420991	0.47962	0.0748462	0.487092	0.475113	0.25259	0.0566603	-0.0956741	0.337975	-0.239918	-0.089412	-0.346252
P09455	RBP1	-2.48291	-2.26827	-2.76705	-2.20656	-2.0404	-2.30828	-2.10337	-2.16436	-1.82405	-1.82385	-2.1911	-1.43775	-2.23732	-1.92414	-2.05097	-2.52209	-2.24799	-2.34199	-2.31469	-1.99524	-1.60611	-1.65768	-1.85333	-2.23975	-2.19715	-2.03966	-2.18212	-2.36043	-2.28	-2.39911	-2.33189	-2.60156	-2.62934	-2.28388	-2.49697	-1.99985	-2.47921	-2.56075	-2.63424	-1.80372	-2.04759	-2.36889	-2.84704	-1.7678	-2.16973	-2.05347	-1.90055	-2.53322
P09467	FBP1	-0.113672	0.089571	-0.0751202	-0.111508	-0.555712	-0.636274	-0.560619	0.913176	-0.286518	-0.402853	-0.673672	0.657744	-0.488111	-0.681342	-0.616252	0.103123	-0.267266	-0.0826605	0.0153537	-0.536836	-0.725523	-0.284137	-0.725106	-0.0977234	-0.185228	1.03295	-0.701867	-0.584743	0.338055	-0.417617	0.105895	-0.32325	-0.391671	-0.184548	-0.0601112	0.417485	-0.209466	-0.879002	-0.573944	-0.0696482	-0.0732392	-0.0716616	-0.512378	-0.249312	0.236944	0.321164	0.373304	0.00923
P09471	GNAO1	-0.0466055	-0.735811	-0.871061	-1.05316	-1.16952	-1.15131	-0.928023	-1.55333	-1.02731	-1.71826	-1.13115	-1.80941	-0.887393	-0.159749	-0.139086	-0.993957	-1.09533	-1.13609	-1.22713	-1.07253	-0.967492	-0.876919	-1.0705	-1.12422	-0.956124	-1.19722	-1.03268	-0.761553	-1.0683	-1.33573	-0.854671	-1.27089	-1.17484	-0.927746	-0.635025	0.79011	-0.564704	-1.12347	-1.16831	-1.08216	-1.24821	-0.968469	-1.11889	-1.28559	-1.35369	-1.30261	-1.12159	-1.24812
P09486	SPARC	-0.38504	-0.267035	-0.481403	-0.00250362	-0.549789	-0.450181	-0.401544	-0.864882	-0.351681	-0.207545	-0.421578	0.070688	-0.164278	-0.172881	-0.191916	-0.355359	-0.340766	-0.292395	-0.313858	-0.541501	-0.562312	-0.429268	-0.241162	-0.0039419	0.0995248	-0.0330985	-0.155579	-0.0579999	-0.111255	-0.414979	-0.346163	-0.378573	-0.42132	-0.041942	-0.0308716	0.0369201	-0.0564928	-0.481396	-0.411645	-0.257019	-0.631917	-0.336013	-0.311148	-0.327684	-0.330069	0.101058	-0.364462	-0.200246
P09488	GSTM1	0.234958	0.0190971	-1.97361	-1.80629	-1.90617	0.0321818	-1.98529	-1.47536	-2.0053	-0.0134176	-0.333965	-0.107026	-0.0374039	1.1083	0.0582353	-0.356245	-0.335043	-0.25156	-0.632779	-0.518913	-0.457843	-0.370901	-0.556988	-0.676252	-0.556934	-0.771681	-0.231772	-1.3452	0.488585	-1.39812	0.302826	-1.53042	0.320811	-0.594355	-0.773749	-0.257663	-0.759792	-0.490509	-0.745253	-1.87196	-1.48675	0.244049	-0.481989	-0.899318	-1.77466	-1.56907	-1.38958	-2.23781
P09493	TPM1	-0.937225	-0.930435	-1.7812	-1.0652	-0.412152	-0.627318	-0.60963	-0.355481	-0.827771	-0.478458	-0.80376	-0.447528	-0.887393	-0.927409	-0.737467	-0.826557	-0.408484	-0.575404	-0.51601	-0.444325	-0.697522	0.238545	-0.262463	-0.489409	-1.24331	-0.540629	-0.936338	-0.967236	-1.00279	-0.286123	-0.376988	-0.696292	-0.412694	0.0426965	-0.354181	-0.801407	-0.110545	-0.677815	-0.850849	-0.233956	-0.866723	-0.315031	-0.669381	-0.431846	-0.337592	-0.682695	0.04807	-0.921449
P09496	CLTA	-0.175107	0.00571451	-0.0522068	0.0652754	-0.0872328	-0.137148	0.0363246	-0.306572	-0.204655	-0.162899	0.0311018	0.0747052	-0.0316793	-0.30168	-0.131658	-0.204229	-0.161337	0.0400201	0.0932467	0.0709597	-0.0201726	0.0424798	-0.00100475	0.0632622	-0.984758	0.240405	0.0275009	0.151566	0.161341	-0.0279362	-0.088982	-0.0343094	-0.0109669	-0.0402671	-0.0917364	0.0841651	-0.177133	-0.213016	-0.199666	-0.326556	-0.173032	-0.0669892	-0.448728	-0.108209	0.264591	-0.234794	0.27683	0.0801622
P09497	CLTB	-0.071341	-0.0714452	-0.0705412	-0.0720964	-0.590603	-0.286236	-0.386282	-0.698303	-0.488543	-0.354948	-0.404863	-0.219104	-0.185205	-0.43267	-0.31254	-0.425078	-0.548045	-0.219991	-0.315032	-0.274956	-0.981869	-0.324555	-0.41147	-0.191331	-0.00309031	0.0838354	-0.249265	-0.213476	-0.320415	-0.229149	-0.259646	0.0994152	-0.356461	-0.272419	-0.451361	0.00814892	-0.455863	-0.233853	-0.524382	-0.12463	-1.03765	-0.458472	-0.287383	-0.46957	-0.31687	-0.387375	-0.464745	-0.070381
P09525	ANXA4	0.593732	0.630834	0.298383	0.605115	0.327169	0.276477	0.564016	0.731758	0.948194	0.379868	1.31022	0.852329	0.052619	0.340809	0.208525	0.284337	0.248388	0.438827	0.465026	-0.187114	-0.196557	0.38456	0.0841182	-0.367436	-0.330143	-0.260934	-0.103505	0.12376	-0.117676	0.445193	0.150919	0.430323	0.189373	0.296601	0.496339	-0.105581	0.344238	0.0443201	0.22494	0.105783	0.213965	0.21206	-0.249571	0.297995	0.114876	0.268612	0.344149	0.147261
P09543	CNP	-0.126829	0.0462772	-0.371874	-0.459091	-0.0488727	-0.235926	-0.360734	-0.324121	-0.411861	-0.469136	-0.140431	-0.124245	-0.0522981	0.101845	-0.0710319	-0.208915	-0.278207	-0.755603	-0.571978	-0.563417	-0.260959	-0.309453	-0.361509	-0.63214	-0.668771	-0.470332	-0.0411739	-0.119364	-0.113368	-0.396608	-0.186896	-0.220524	-0.292926	-0.396551	-0.541839	-0.245276	-0.213484	-0.198287	-0.801079	-0.546542	-0.661876	-0.0742189	-0.339222	-0.341665	0.0877931	-0.258676	-0.364462	-0.0648729
P09619	PDGFRB	-0.071341	-0.0714452	-0.0705412	-0.0720964	-0.0721662	-0.0722391	-0.0722065	-0.0726154	-0.0718019	-0.0710434	-0.072789	-0.0713537	-0.0705533	-0.0704325	-0.0710548	-0.0713588	-0.0713768	-0.0722234	-0.0711924	-0.494889	-0.198551	0.0757127	-0.0720632	-0.072483	-0.0735226	-0.0722858	-0.0666033	-0.0683238	-0.0740938	-0.0712652	-0.0701293	-0.0708997	-0.0700396	-0.0667255	-0.0654228	-0.0757322	-0.0653662	-0.0710484	-0.072427	-0.0696482	-0.0732392	-0.0716616	-0.0720372	-0.0713852	-0.0714106	-0.0723681	-0.0719338	-0.070381
P09622	DLD	0.0231926	-0.0803094	0.349593	0.0860355	-0.0506122	0.295465	0.0756602	0.214459	0.137325	-0.186439	-0.0562748	-0.0277032	0.423242	0.195829	0.234281	0.252924	-0.213798	0.024037	0.0428486	0.200502	-0.0662867	-0.185504	-0.0747418	0.326483	0.0768206	0.122211	0.666809	0.0233511	0.118019	-5.90782e-18	0.226519	-0.077057	-0.00585218	0.257487	0.161838	-0.215302	-0.119363	0.0975911	0.22494	0.0785418	-0.0197257	0.19073	0.289102	0.0569948	-0.00546841	-0.0278489	0.154652	0.667874
P09651	HNRNPA1	0.213071	0.137355	0.152546	0.420884	0.307734	0.198552	0.0737552	0.0338734	0.370615	0.444948	0.403923	0.0362058	0.632798	0.65208	0.583292	-0.0147386	0.258119	-0.155458	-0.111107	0.599563	0.758347	0.208361	0.557864	0.105847	-0.547492	0.145796	0.305099	0.5305	0.261917	0.347796	0.54232	0.00886072	0.558783	0.500038	0.645436	0.258612	0.530952	0.414537	0.234568	0.723606	0.565325	0.346392	0.451729	0.368833	0.114876	-0.0347358	0.108401	0.115549
P09661	SNRPA1	0.323289	0.309948	0.205409	0.462435	0.0653746	0.173925	0.0153831	0.569155	0.531204	0.466045	0.377103	0.43473	0.429322	0.645391	0.422986	0.234879	0.0896686	0.194381	0.335551	-0.0024116	0.0452866	-0.382446	0.266225	0.284625	-0.187011	0.322534	0.149062	0.246328	0.491403	0.402232	0.403857	0.713236	0.355216	0.139032	0.291491	0.311559	0.111782	0.276626	0.720646	0.260455	0.135748	0.0501502	0.156808	0.148669	0.192628	-0.305125	-0.426631	0.179437
P09669	COX6C	0.240629	0.195969	0.244645	-0.198146	0.306905	0.189593	0.0988355	-0.421267	-0.0109315	0.129916	0.250079	0.0995724	0.326425	0.4109	0.227482	0.148649	0.253779	0.151983	0.186606	0.355668	0.378122	-0.215956	0.189931	0.060629	0.41942	0.0529405	0.452906	0.0297756	0.00701019	-0.0279362	0.261331	-0.134477	0.10108	0.284825	0.481992	-0.096138	0.0883532	0.235242	0.105262	-0.0244096	0.314523	-0.145171	-0.219741	0.17737	-0.0714106	-0.0723681	-0.0719338	-0.142739
P09874	PARP1	0.043496	0.141577	0.0165267	0.215034	-0.0524041	-0.272325	-0.244755	-0.0705237	-0.0978217	-0.36919	0.0719715	-0.335369	0.0501682	0.0652429	0.0839766	-0.104711	-0.159581	-0.116136	-0.0211418	-0.35822	0.752879	-0.454524	0.0506601	0.645883	-0.37759	0.406371	0.0396919	0.519373	0.277538	0.138939	0.108268	0.201975	0.018952	-0.108559	0.1654	0.0267494	-0.00962291	-0.0951267	0.0335784	0.169486	0.0703243	-0.255113	-0.0601148	0.307945	-0.125965	-0.166586	-0.249865	0.388326
P09914	IFIT1	-0.071341	-0.0714452	-0.0705412	-0.0720964	-0.31892	-0.312929	-0.238181	0.0442841	-0.174375	-0.170694	-0.26264	0.10859	-0.129272	-0.21753	-0.182619	-0.171885	-0.174842	-0.194364	-0.303752	-0.50332	-0.0684555	0.332435	-0.528314	-0.462437	-0.414953	0.845859	-0.745107	-0.524774	1.13042	0.318616	-0.265814	-0.241952	-0.261237	-0.279734	-0.244504	-0.0633373	-0.0661483	-0.79454	-0.467209	-0.0696482	-0.0732392	-0.0716616	-0.745249	-0.131362	-0.250142	-0.466137	-0.429895	-0.070381
P09917	ALOX5	-0.496623	-0.212263	-0.231543	-0.118848	-0.0721662	-0.0722391	-0.0722065	-0.0726154	-0.0718019	-0.0710434	-0.072789	-0.0713537	-0.0705533	-0.0704325	-0.0710548	-0.0713588	-0.0713768	-0.0722234	-0.0711924	-0.0705648	-0.0705155	-0.0709777	-0.0720632	-0.072483	-0.0735226	-0.0722858	-0.0666033	-0.0683238	-0.0740938	-0.0712652	-0.0701293	-0.0708997	-0.0700396	-0.0667255	-0.0654228	-0.0757322	-0.0653662	-0.0710484	-0.072427	-0.0696482	-0.0732392	-0.0716616	-0.0720372	-0.0713852	-0.0714106	-0.0723681	-0.0719338	-0.429681
P09936	UCHL1	-1.53663	-0.549677	-1.57988	-1.1525	-0.822027	-1.5309	-1.41244	-0.399132	-1.05595	-0.95525	-1.36772	0.794166	-1.29416	-0.798123	-0.334396	-1.37049	-1.28139	-1.41387	-1.14449	-1.31763	-0.796804	-1.11488	-0.89181	-0.769513	-0.381387	-0.796935	-1.52188	-1.48812	-1.55214	-1.50494	-1.07502	-1.63824	-1.6026	-1.2716	-1.5099	0.0448028	-1.5967	-1.35514	-0.817911	-1.50399	-0.768419	-0.838151	-1.33864	-1.25883	0.12466	-1.18096	-0.889807	-1.84663
P09960	LTA4H	0.186572	0.0856442	0.0127923	-0.353327	0.290925	0.130895	0.170704	0.307071	0.289177	0.156362	-0.0347025	0.593946	0.0794683	0.0884764	0.0333656	0.0283513	0.213427	0.410465	-0.269392	0.344529	0.230296	0.645789	-0.029469	-0.227525	0.116319	-0.252439	0.0495538	-0.265078	0.095135	-0.426593	-0.014671	0.0381285	-0.0793542	0.0683294	-0.181413	0.220963	0.0527902	0.133949	-0.470455	-0.00680942	-0.713039	-0.340615	-0.0554132	-0.332565	-0.0333198	-0.0533958	-0.21537	0.144267
P09972	ALDOC	-1.13085	-0.877834	-1.22623	-1.25008	-1.4782	-1.49735	-1.28122	-1.23617	-0.754718	-1.38063	-1.04773	-1.24574	-1.58424	-1.52159	-1.47065	-1.16347	-0.845705	-1.05652	-1.15682	-1.21457	-1.53651	-1.72275	-1.44561	-1.43867	-1.67417	-1.28746	-1.3908	-1.11625	-1.53785	-1.0101	-1.00655	-1.71904	-1.49568	-0.624259	-0.91466	0.499307	-0.805021	-0.842986	-1.32634	-1.89922	-1.55189	-1.11538	-1.21593	-1.89365	-1.37003	-0.970839	-0.968114	-1.33261
P0C0L4	C4A	-0.591123	-0.786409	-0.374528	-0.617415	-0.0721662	-0.0722391	-0.0722065	-0.0726154	-0.0718019	-0.0710434	-0.072789	-0.0713537	-0.672436	-0.398017	-0.470113	-1.38699	-0.996529	-1.11914	-1.15682	-0.0705648	-0.0705155	-0.0709777	-0.282908	0.165204	-0.239409	-0.50388	-0.532235	-0.740149	-0.0702426	-0.126662	-0.527	-0.114515	-0.670029	-1.21256	-1.22525	0.647253	-0.972569	-0.0710484	-0.072427	0.204413	0.0256002	-0.213549	-0.447313	-1.06722	-0.666067	-0.89005	-1.06824	-0.717696
P0C0L5	C4B	-1.10947	-1.04532	-0.415143	-1.02394	-1.14221	-1.09871	-0.928023	-1.08001	-0.92569	-0.950124	-1.01988	-0.914519	-1.12145	-0.943401	-1.08026	-1.12076	-1.02517	-1.07267	-1.11601	-1.09493	-0.800947	-0.388817	-1.12042	-1.1164	-0.717702	-1.25753	-1.3678	-0.950093	-1.1462	-1.0153	-1.1645	-0.886874	-0.679464	-1.10173	-1.14512	-1.47168	-1.00139	-0.766595	-1.06633	-0.307657	-1.16687	-1.07258	-1.19184	-1.05266	-0.711766	-0.981849	-1.11992	-1.14787
P0C0S5	H2AZ1	0.385757	0.556371	0.147968	0.0663137	0.428725	-0.40234	-0.173426	0.522721	0.382121	-0.302081	0.834313	-0.145721	0.120291	0.329605	0.441291	0.218372	0.419694	-0.119431	0.220722	0.28173	0.945637	0.0794451	0.390385	0.19376	-1.19755	0.463335	0.105518	0.344429	0.196779	0.0517898	-0.123752	0.0641884	0.153404	-0.0702787	0.685679	0.458105	0.654866	0.458287	0.0976349	0.185755	0.0524385	-0.32561	-0.0692193	-0.0956741	-0.261548	0.196674	0.110566	-0.13307
P0C870	JMJD7	-0.071341	-0.0714452	-0.0705412	-0.0720964	-0.0721662	-0.0722391	-0.0722065	-0.0726154	-0.0718019	-0.0710434	-0.072789	-0.0713537	-0.0705533	-0.0704325	-0.0710548	-0.0713588	-0.0713768	-0.0722234	-0.0711924	-0.0705648	-0.0705155	-0.0709777	-0.0720632	-0.072483	-0.0735226	-0.0722858	-0.575867	-0.263766	-0.380112	-0.0712652	-0.0701293	-0.0708997	-0.0700396	-0.0667255	-0.0654228	-0.0757322	-0.0653662	-0.0710484	-0.072427	-0.0696482	-0.0732392	-0.0716616	-0.0720372	-0.0713852	-0.0714106	-0.0723681	-0.0719338	-0.070381
P0CG08	GPR89B	-0.341268	-0.142564	-0.218825	-0.285825	-0.193621	-0.165714	0.104006	-0.361406	-0.585752	-0.280232	-0.36497	-0.059255	-0.139077	0.0123366	-0.0951484	-0.183992	-0.112036	-0.0155527	-0.163445	-0.418506	-0.513785	-0.348152	-0.371227	-0.112965	0.181111	0.211822	-0.523753	-0.587696	-0.330205	0.147638	0.0600584	0.254298	0.153404	-0.22254	-0.209586	0.0827216	-0.110545	-0.136059	-0.0415212	-0.137829	-0.140435	-0.13629	-0.371348	0.00154884	-0.412201	-0.299603	-0.322577	-0.576931
P0CG22	DHRS4L1	-0.071341	-0.0714452	-0.0705412	-0.0720964	-0.0721662	-0.0722391	-0.0722065	-0.0726154	-0.0718019	-0.0710434	-0.072789	-0.0713537	-0.0705533	-0.0704325	-0.0710548	-0.0713588	-0.0713768	-0.0722234	-0.0711924	-0.0705648	-0.0705155	-0.0709777	-0.0720632	-0.072483	-0.0735226	-0.0722858	-0.0666033	-0.0683238	-0.0740938	-0.195532	-0.229108	-0.229556	-0.033272	-0.0667255	-0.0654228	-0.0757322	-0.0653662	-0.0710484	-0.072427	-0.0696482	-0.0732392	-0.0716616	-0.0720372	-0.0713852	-0.0714106	-0.0723681	-0.0719338	-0.070381
P0CG29	GSTT2	-0.247723	-1.44991	0.213359	-0.697165	-0.890906	-0.639017	-0.721152	-0.686043	-1.2565	-1.2905	-1.10138	-1.6052	-0.745317	-0.489512	-0.614992	-1.08574	-0.323648	-0.647188	-0.946317	-0.122792	-1.68252	-0.474343	-0.681095	-0.971455	-0.592362	-0.86179	-0.815999	-0.690854	-0.994044	-0.873038	-0.543697	-0.754854	-0.713185	-0.546164	-0.716795	0.573675	-0.598613	-0.731202	-0.764433	-1.6757	-1.93135	-0.804157	-1.27483	-0.969444	-1.18019	-0.223252	-1.06824	-1.3423
P0CG30	GSTT2B	-0.374549	0.0938871	-0.33163	-0.467726	-0.620887	0.658706	0.329873	-0.514407	-0.102912	-0.212038	-0.158649	-0.975892	0.0457452	-0.211928	-0.101493	-0.0921158	-0.0425521	-0.124096	-0.280735	-0.25865	-0.100883	-0.640444	-0.297829	-0.176812	-0.235961	-0.542333	-0.0143033	0.332401	-0.695255	-0.444312	0.0853898	-0.240706	0.0725939	0.345512	-0.32575	0.0181623	-0.734461	0.0954356	-0.112894	0.183311	-0.358865	-0.22251	-0.389491	-0.27599	-0.345736	-0.463948	-0.643151	-0.244231
P0DI81	TRAPPC2	-0.189952	0.0180497	0.0543324	-0.0917262	0.113374	0.130589	0.242071	0.378792	0.19608	-0.049355	0.0914898	0.211724	-0.0223523	-0.0142081	-0.070975	0.388871	0.232741	0.281573	0.171533	0.390596	0.202389	0.192793	0.00501664	0.341601	0.304257	0.180984	0.247036	0.171731	0.302786	0.190917	-0.116407	0.167412	0.0710184	0.0141525	-0.141484	0.519359	0.228415	0.144291	0.47375	0.113193	0.392938	0.294289	0.0842719	0.0905149	0.143755	0.448794	0.406489	0.0778341
P0DMP2	SRGAP2B	0.597071	-0.140076	-0.307648	0.519579	-0.0721662	-0.0722391	-0.0722065	-0.0726154	-0.0718019	-0.0710434	-0.072789	-0.0713537	-0.0705533	-0.0704325	-0.0710548	-0.0713588	-0.0713768	-0.0722234	-0.0711924	-0.0705648	-0.0705155	-0.0709777	-0.0720632	-0.072483	-0.0735226	-0.0722858	-0.0666033	-0.0683238	-0.0740938	-0.0712652	-0.0701293	-0.0708997	-0.0700396	-0.0667255	-0.0654228	-0.0757322	-0.0653662	-0.0710484	-0.072427	-0.0696482	-0.0732392	-0.0716616	-0.0720372	-0.0713852	-0.0714106	-0.0723681	-0.0719338	-0.0164153
P0DMV8	HSPA1A	0.0934515	0.125052	0.0934996	-0.219134	0.562883	-0.355187	0.387308	-0.0198449	0.105758	-0.0293682	0.0128864	0.162551	0.327693	-0.415675	0.386937	0.0849426	-0.120883	0.0919119	0.237215	-0.486545	1.05666	0.322045	0.364379	0.915181	0.0503178	-0.0143728	0.0332247	0.713043	0.37571	-0.32082	-0.30123	0.797158	0.351759	0.123865	0.0336484	0.0854195	0.300581	-0.244791	-0.0794633	-0.226869	-0.246603	-0.415934	0.0896689	0.1719	-0.335625	0.126012	0.262567	0.207333
P0DN76	U2AF1L5	-0.00188996	-0.0490381	-0.195318	0.136022	0.0705921	-0.142505	0.290887	0.0383557	-0.208476	-0.236497	-0.158263	-0.207675	-0.46538	-0.699992	-0.640804	-0.623164	-0.300085	-0.716639	-0.619875	-0.794485	-0.866327	-1.13119	-0.292645	0.0386251	-0.0934291	-0.280226	-0.263081	-0.223247	-0.445648	0.00919464	-0.0523528	-0.171471	0.00112431	0.0956996	0.241777	0.196863	0.331166	0.0704831	0.0962751	0.110058	0.144243	-0.0494554	-0.387392	-0.412802	-0.0714106	-0.0723681	-0.0719338	-0.122086
P0DOX5	N/A	-1.64037	-2.02565	-0.200821	-1.84819	-1.79367	-1.38839	-1.451	-1.77888	-1.79238	-1.58719	-1.63873	-1.98487	-2.13497	-1.57514	-2.08608	-2.2363	-1.73541	-2.12957	-2.23659	-2.25947	-1.59011	-2.20939	-2.15536	-1.99761	-0.976762	-1.87537	-1.21995	-1.54722	-1.16254	-1.5617	-2.11429	-1.42085	-1.81173	-1.61939	-1.74876	-1.69006	-2.25658	-1.73025	-1.65845	-1.44474	-2.07365	-1.83561	-1.69748	-2.00588	-1.4249	-1.66241	-2.41631	-1.78551
P0DOX6	N/A	-0.984658	-0.956712	-0.696898	-1.12991	-0.352354	-1.49735	-1.0751	-1.46718	-1.00377	-0.911201	-0.613966	-1.49986	-0.915116	-1.14891	-1.48999	-0.97168	-1.2959	-0.30253	-0.975946	-1.13668	-0.879022	-0.677964	-1.28686	-0.998629	-1.21878	-0.239517	-1.10069	-1.47287	-0.0467433	-1.08229	-1.16083	-1.01241	-0.892188	-1.02804	-1.14413	-0.899268	-1.08021	-1.06785	-1.08692	-0.58742	-1.15248	-1.12168	-1.12691	-1.11741	-0.732927	-1.11432	-1.19974	-0.758965
P0DOX7	N/A	-1.44913	-1.33805	-0.670593	-0.950637	-1.31751	-1.16069	-1.25499	-1.40212	-1.24615	-1.0665	-1.3202	-0.992608	-1.36368	-1.14459	-1.31334	-1.58061	-1.22653	-1.21457	-1.67068	-1.40603	-1.23733	-1.23579	-1.37044	-1.23845	-0.658895	-1.22938	-1.66967	-1.53329	-0.627243	-1.08331	-1.29269	-0.670061	-1.32599	-0.927746	-0.695055	-1.3755	-1.43655	-1.24407	-1.29171	-0.63446	-1.26707	-1.23432	-1.25068	-1.24738	-1.00476	-1.1154	-1.26114	-0.71828
P0DOX8	N/A	-1.40635	-1.64131	-0.512729	-1.42236	-0.189672	-0.105602	-0.25717	-0.255189	0.244594	0.896863	0.410463	0.113671	-0.196005	-0.37157	-0.381003	-1.18165	-0.833643	-1.12907	-1.23359	-0.686988	-1.1454	-1.30575	-0.266572	-0.0571743	-0.420649	-0.312063	-0.293973	-0.218339	-0.145272	0.0185881	0.010482	-0.0988924	-0.150228	-0.154074	-0.3311	-0.0445848	-0.2612	-0.110293	-0.176292	-0.0781401	0.237428	0.206208	-0.219832	-0.418382	-0.251041	-0.678626	-0.727385	-1.51573
P0DOY2	IGLC2	-1.57185	-1.9122	-0.420149	-1.72282	-1.74795	-1.47492	-1.46515	-1.92781	-1.52021	-1.64598	-1.2877	-1.53927	-1.51268	-1.47962	-1.54568	-2.10418	-1.48089	-1.88781	-1.85898	-1.72207	-1.37725	-1.77454	-1.66774	-1.90204	-1.30528	-1.57513	-1.75005	-2.03994	-1.26183	-1.46353	-1.54509	-1.57968	-1.6395	-1.53658	-1.23528	-1.3477	-1.58044	-1.32572	-1.48881	-0.946716	-1.75032	-1.89151	-1.47093	-1.96724	-1.15978	-1.4854	-1.6183	-1.62566
P0DP23	CALM1	-0.236036	0.367758	0.617427	0.505761	-0.300833	0.592959	0.726117	0.898076	0.939967	-1.05311	0.634419	-0.988421	0.692246	-0.534694	0.607142	0.569832	-0.690434	0.433846	0.932302	0.458097	-1.19101	-1.84579	-0.76668	0.355798	-0.945438	0.893895	0.51075	0.613123	0.726716	0.131407	0.522552	1.15343	0.680755	0.684472	0.73454	0.950959	0.527821	0.470019	0.88524	-0.88906	0.914237	0.62292	0.380073	-0.0211328	-0.250142	1.19571	0.641235	0.0766707
P0DPK2	H3Y1	0.582537	0.681783	-0.0492385	0.6917	0.323544	0.289163	0.572996	0.630134	0.485367	0.421618	0.407866	0.032697	0.438301	0.938641	0.78413	0.400078	0.489583	0.285175	0.309302	0.410549	0.476929	0.110061	0.648698	0.357308	-0.411007	0.363817	0.403817	0.447064	0.409669	0.144484	0.5143	0.318316	0.610532	0.341036	0.399179	0.325879	0.482635	0.527364	0.401638	0.366254	0.313143	0.160085	0.384042	0.366352	0.247984	0.0091436	0.204933	-0.205808
P10109	FDX1	-0.0570635	0.165121	0.495141	0.573875	-0.461806	-0.575567	-0.579197	-0.00654165	-0.508276	-0.482949	-0.505839	-0.348079	-0.351474	-0.337381	-0.148785	-0.445293	-0.423074	-0.474765	-0.35654	0.140682	0.105146	0.253757	-0.989531	-0.611186	-0.584246	-0.503777	-0.453137	-0.281618	-0.371083	-0.341819	-0.351182	-0.0374321	-0.328701	-0.306093	-0.305155	-0.713465	-0.249733	-0.320621	-0.341286	-2.12604	-1.93135	-1.64118	-0.709976	0.0935974	-0.323372	-0.343467	-0.308001	0.219963
P10155	RO60	0.014614	0.0964972	0.338038	-0.00747855	0.0128593	0.0774995	0.0640532	0.0770641	0.314206	0.204628	-0.0096667	-0.0143305	0.0785463	-0.0237358	0.0969337	-0.130666	-0.0445617	-0.0210249	-0.175909	0.164761	0.115134	-0.0736552	0.0841182	0.216058	0.217003	0.162497	0.0762655	0.0555831	0.145874	-0.151463	0.130321	0.0133173	-0.0423184	0.295452	0.000915764	0.234669	0.0527902	0.124369	-0.0814552	0.147555	-0.114758	0.148281	0.105168	-0.108209	-0.132979	-0.21085	-0.282039	0.000727514
P10253	GAA	0.176652	0.353843	0.0635585	0.61758	0.112219	-0.164037	0.0746416	0.674972	-0.370872	-0.36919	-0.153984	0.225304	-0.193512	-0.269561	-0.400059	0.361116	-0.0707078	0.174806	0.183598	-0.0416948	-0.0261896	0.236645	-0.417063	-0.473105	-0.0822794	-0.48723	-0.0251188	-0.00104979	-0.0712202	0.926554	-0.459567	0.235187	-0.217902	-0.393357	-0.147787	-0.220346	-0.288515	-0.286211	0.0193634	-0.102492	0.382289	0.0140575	-0.0299249	0.189696	-0.0789818	0.865548	0.58688	0.499848
P10301	RRAS	-0.0552243	0.0745555	-0.0483273	-0.450573	0.280785	0.0496499	0.169951	-0.311119	0.0557649	-0.299481	0.230409	-0.465564	-0.0216767	0.275845	0.199482	-0.0407356	0.107759	0.0146932	-0.0768588	-0.0672011	-0.245088	-0.0654131	-0.0383374	0.359687	-0.0737891	-0.302613	-0.0614834	0.122788	-0.314027	-0.538619	-0.0969523	-0.39494	-0.984682	0.0694685	0.175731	-0.275117	0.292529	-0.50692	-0.364172	-0.344972	-0.588363	-0.586601	-0.485439	-0.459598	-1.10359	-0.673782	-0.906283	-0.246552
P10321	HLA-C	-0.362095	-0.372698	-0.656683	-0.345197	-0.308105	-0.281248	-0.408094	0.647393	-0.244737	-0.36919	-0.403814	0.57964	0.021327	-0.161052	-0.0219887	-0.137823	-0.300085	0.0929263	1.38682	-0.242724	-0.129526	0.548318	-0.031731	-0.328411	-0.0342725	-0.182744	-0.266977	-0.313135	0.397288	-0.219172	0.290926	-0.286903	0.012639	-0.0455295	-0.115611	0.451452	-0.420537	-0.180274	0.1571	-0.136961	0.400934	-0.283745	-0.278414	-0.298624	-0.05495	0.255931	0.100932	-0.209476
P10398	ARAF	-0.071341	-0.0714452	-0.0705412	-0.0720964	-0.0721662	-0.0722391	-0.0722065	-0.0726154	-0.070072	0.365904	-0.0658285	-0.198323	-0.239362	-0.452412	-0.366764	0.0939475	0.294328	-0.025119	-0.259836	-0.310751	-0.358139	0.0469575	-0.222147	0.154221	0.120388	-0.0600519	-0.141913	-0.127201	-0.161912	-5.90782e-18	0.195677	0.00741955	-0.179911	-0.061654	-0.324093	0.0931801	-0.107479	-0.308785	-0.24406	-0.125808	0.0372639	-0.20243	-0.101161	-0.580635	-0.0216215	0.266216	0.153585	-0.070381
P10412	H1-4	-0.478912	0.17574	-0.137115	0.381101	-0.354779	0.0577005	-0.244755	0.32815	0.215078	-0.634944	0.261369	-0.76376	1.90946	1.30002	1.90946	-0.480325	-0.546818	-1.06656	-0.00724707	-0.545543	-1.12375	-0.717311	0.22837	-0.147127	-1.87458	-0.318264	0.0234856	0.0661508	0.21691	-0.030648	1.90946	0.0650148	1.90946	0.238007	0.346094	-1.18826	0.22463	1.53471	-0.283934	-0.108243	-0.0827359	-0.505925	0.16712	-0.547898	-0.0379811	-0.463574	0.114026	-0.804697
P10515	DLAT	0.314565	0.163418	0.360546	0.298886	0.0380906	0.349478	-0.134836	0.0225415	0.00559548	0.194965	0.13604	-0.0338844	0.485987	0.543811	0.253539	0.453901	0.0117158	0.174806	0.277593	0.607538	-0.184341	-0.00706427	0.113282	0.0974013	-0.064326	-0.193203	0.165139	0.113551	0.0165317	0.101995	0.298683	-0.0578275	0.104819	0.180434	0.12214	0.0357898	0.029008	0.0937637	0.126451	0.264893	0.245579	0.312688	0.395279	0.343496	0.242416	0.231969	0.376082	0.548804
P10523	SAG	-1.87055	-2.76858	-2.88683	-2.82031	-2.45506	-2.90701	-2.45472	-2.33854	-2.10294	-2.49062	-2.24801	-2.49074	-2.23732	-2.61756	-2.61684	-2.72924	-2.5631	-2.56301	-2.63681	-2.31407	-2.40923	-2.52209	-3.10569	-2.91408	-2.79356	-2.79381	-2.67779	-2.25459	-2.57526	-2.36425	-2.60156	-2.72327	-2.72367	-2.06359	-1.99985	-0.638738	-2.3708	-2.26969	-2.80185	-2.36782	-2.70586	-2.58072	-1.8826	-2.47148	-2.39369	-2.35532	-2.17018	-2.88822
P10599	TXN	0.816616	0.452784	0.793542	0.308747	0.463622	1.11385	0.97649	0.711015	0.798186	1.01725	1.26835	0.553691	0.895	1.0089	0.770419	0.773818	0.78471	0.788499	0.906995	0.596467	0.533931	0.11872	1.16859	0.867361	1.65878	0.915008	0.592468	1.39918	0.420682	0.57175	0.425437	1.07773	0.768251	0.702862	0.496339	0.139298	0.587977	0.828945	0.26743	0.492133	0.198553	0.888757	0.787257	0.712703	0.193099	0.353611	0.120392	1.01357
P10606	COX5B	-0.111858	0.0474355	-0.188847	-0.174201	0.183593	0.247616	0.21641	-0.0910739	-0.0480221	-0.303932	0.0571873	-0.661241	0.10329	-0.514846	-0.0571714	-0.242146	-0.172065	-0.191248	-0.122731	-0.00622465	-0.104978	-0.738324	-0.0476526	0.0982392	0.0430326	-0.228659	0.0875832	-0.175305	-0.380112	-0.157808	0.265221	-0.319775	0.0101955	0.00131991	0.0263316	-0.427114	-0.234856	0.149651	-0.308902	-0.385216	-0.51953	0.00209177	0.206848	-0.144678	0.0424968	-0.371233	-0.162162	0.114206
P10619	CTSA	-0.0579659	-0.279032	-0.114947	-0.0250558	-0.218451	0.149618	0.368818	0.099606	-0.339552	-0.115524	-0.261628	0.566878	0.249018	-0.172234	-0.308289	-0.0098326	-0.177699	0.0156329	-0.189066	0.171371	0.0602281	-0.156062	-0.096401	-0.379009	0.00158908	-0.0126659	0.139746	0.0874509	0.125574	0.0625905	-0.269057	0.282795	-0.0708768	0.0496987	0.415117	-0.0178662	-0.0667479	-0.345832	-0.350851	-0.40398	-0.103952	0.175952	-0.0722591	0.0796851	-0.441103	-0.234794	-0.442862	-0.070967
P10620	MGST1	-0.15871	-0.439649	-0.053702	-0.010049	0.141179	0.0603755	0.128081	-0.248472	-0.0718019	-0.0710434	-0.072789	-0.0713537	-1.30305	-1.64056	-1.20321	-0.14154	-0.220153	-0.0989303	-0.0651689	-0.0412871	-0.0317877	-0.250058	-0.339652	0.060259	0.138707	0.0866199	-0.22508	-0.259435	-0.175715	-0.268848	-0.16806	-0.222162	-0.099071	-0.130249	0.0479118	-0.371137	-0.247489	-0.323959	-0.116737	-0.126314	-0.194929	-0.172527	-0.10677	-0.439311	-0.317671	-0.245107	-0.449638	-0.0749554
P10643	C7	-1.02649	-1.04837	-0.587709	-1.01015	-1.04007	-1.1152	-0.989824	-0.742037	-1.1242	-0.921859	-1.14576	-0.800717	-0.985129	-0.725656	-0.835944	-0.988814	-0.897532	-0.917897	-1.01224	-0.889811	-0.76079	-0.332836	-0.706672	-0.877482	-0.18691	-0.828834	-1.27432	-1.04882	-1.07051	-1.06281	-1.03821	-1.03241	-0.97642	-0.860247	-0.91611	-0.8556	-0.867446	-1.2999	-1.28294	-0.737401	-1.45101	-1.30666	-1.26592	-1.28522	-0.847038	-0.993376	-0.881931	-1.07923
P10644	PRKAR1A	0.123221	0.562705	0.389437	0.295889	0.0163685	0.363958	0.489668	-0.265883	0.496024	0.777762	0.180536	0.091322	0.714697	0.277615	0.398835	0.913663	0.689509	0.735058	0.237215	0.540261	-0.0410461	0.144902	0.419146	-0.173932	0.907439	-0.0235494	0.858864	0.345738	0.361284	0.247408	0.577544	0.451684	0.657397	0.623697	0.496339	-0.240784	0.478864	0.858558	0.118651	0.31425	-0.240547	0.335689	0.546918	0.0139318	0.641051	0.378769	0.43897	0.26178
P10721	KIT	-0.0424009	-0.210881	-0.269614	0.420884	-0.0713794	0.212745	0.320598	1.11405	0.117455	0.0607942	-0.0191765	0.236097	-0.299049	0.264977	0.211494	0.12531	0.189652	0.100277	0.377888	-0.0122233	0.588069	0.0446468	-0.174102	0.329579	-0.0872444	-0.0375745	-0.0424878	0.349736	-0.232982	-0.423501	0.28905	0.135215	-0.114279	0.195623	0.334302	-0.0587107	0.194808	-0.00167763	0.519785	-0.0839598	0.0684712	0.428288	-0.20214	0.941615	0.0323141	-0.0278489	-0.118505	-0.309241
P10745	RBP3	-2.1569	-2.50657	-2.50386	-2.61479	-2.22117	-2.49188	-2.24831	-2.26309	-2.1911	-0.670371	-2.07756	-1.96427	-2.42333	-2.38666	-1.95694	-2.40999	-2.05672	-2.37379	-2.43047	-1.87957	-1.69536	-1.54728	-1.48805	-2.35371	-1.47502	-2.26506	-2.46373	-2.42955	-2.3313	-2.21065	-2.36354	-2.47373	-2.43978	-2.37053	-2.40554	-2.56056	-2.56094	-2.07591	-2.0997	-2.40693	-2.33411	-2.11285	-2.27073	-1.47325	-1.81712	-1.94251	-1.63203	-2.30198
P10768	ESD	0.327662	0.293775	0.188105	-0.138646	-0.0287035	0.345754	0.31055	0.0455393	0.266723	-0.358557	0.184044	-0.28959	0.307668	0.156591	0.439623	0.208216	-0.0329049	0.156416	0.0332756	-0.103861	0.00920439	-0.25714	0.232515	-0.0563748	-0.190498	0.0124984	0.0168257	0.394555	-0.0888092	-0.130008	0.096064	0.188442	0.0994448	0.0330414	-0.0641148	0.741438	-0.0430648	0.147117	-0.0850381	-0.244938	-0.31982	0.151064	0.199211	-0.0055574	-0.0938992	-0.424775	-0.153689	0.0044652
P10809	HSPD1	0.482839	0.233845	0.470057	0.0880559	0.639422	0.565475	0.0903454	0.381835	0.487216	0.663667	0.431675	-0.217633	0.876454	0.693448	0.501472	0.712765	-0.00199236	0.386995	0.502553	0.665419	0.195753	-0.183539	0.315609	0.545342	0.423213	0.168734	0.581785	0.311182	0.185122	0.426988	0.647401	0.268818	0.381315	0.653615	0.595911	-0.143336	0.508233	0.448984	0.4301	0.768231	0.539414	0.482934	0.58234	0.685898	0.281189	0.31117	0.275507	1.15977
P10909	CLU	-1.7046	-1.76109	-1.04571	-1.69864	-1.9859	-1.98691	-1.83189	-1.57372	-2.24801	-1.10882	-2.05107	-1.71849	-1.82152	-1.80887	-1.7651	-2.46565	-1.94996	-2.44885	-2.18442	-2.25947	-1.74085	-0.821719	-1.52915	-1.93074	-0.928822	-2.35343	-2.00154	-1.84946	-1.81031	-2.14312	-2.4391	-2.1967	-2.04327	-1.80632	-1.91759	-1.95369	-1.93659	-2.00946	-2.25671	-1.56582	-1.99172	-2.48864	-1.965	-1.84134	-1.77466	-2.00553	-1.92155	-1.90069
P11021	HSPA5	-0.0482496	-0.200462	0.0737607	0.161666	0.0988945	0.0902182	0.297289	0.524399	0.00259525	-0.0259564	0.15401	0.339072	0.0123412	0.0637516	-0.0931843	0.106461	0.0556983	0.244193	0.211607	0.151776	0.038732	0.166021	0.0017847	0.0432665	-0.0492946	0.223059	-0.0791568	0.0222005	0.454419	0.135101	-0.170631	0.155467	-0.0526599	-0.0727699	-0.0086766	0.137936	-0.191988	0.022619	0.23968	0.0680665	0.264998	0.341381	0.0276506	0.0353019	0.38	0.374745	0.302922	0.148531
P11047	LAMC1	-0.528281	-0.767563	-1.187	-0.71411	-0.691519	-0.971394	-0.964717	-0.133084	-1.0425	-1.01091	-0.94675	-0.0816183	-0.98572	-0.493389	-0.577186	-1.11241	-1.01426	-1.0395	-0.597603	-0.862972	-0.757981	-0.156062	-0.763873	-0.640061	-1.37868	-0.588254	-1.07953	-1.25663	-1.22514	-0.776292	-0.605154	-1.29554	-0.812617	-1.02172	-0.344445	-1.48775	-0.649675	-0.916989	-0.833367	-0.521077	-0.378486	-0.496495	-1.03856	-0.795717	-0.503643	-0.584251	-0.462818	-0.499132
P11117	ACP2	-0.552345	-0.242524	-0.018043	-0.074744	-0.0844044	-0.455939	-0.0720894	0.612532	-0.336477	-0.137398	-0.373421	0.438494	-0.224734	-0.21521	-0.428517	0.354257	-0.201595	0.138093	0.141408	0.244796	0.18376	0.450472	-0.279156	-0.480514	0.167091	0.0652797	-0.421145	-0.237327	0.153902	-0.153627	-0.59231	-0.223018	-0.53639	-0.498284	-0.282188	-0.223968	-0.437557	-0.499482	-0.0340233	-0.223101	0.14861	-0.154833	-0.451104	-0.0504954	-0.356731	0.201954	0.196527	0.0575971
P11137	MAP2	-1.09498	-1.0786	-0.684674	-1.18905	-0.526774	-0.988703	-0.773886	-1.30324	-1.06715	-1.32549	-1.09987	-1.24743	-1.4756	-1.30014	-1.12871	-1.36016	-1.52419	-1.64353	-1.81225	-1.32853	-1.07792	-1.17785	-1.11667	-1.19481	-0.394682	-1.25532	-1.32763	-1.03371	-1.62099	-1.311	-1.09851	-1.10415	-1.22874	-0.850075	-1.81962	0.458105	-1.16559	-1.11763	-1.16516	-0.857414	-1.13956	-0.996625	-0.853672	-0.968198	-1.51508	-1.59859	-1.57973	-1.15014
P11142	HSPA8	0.120827	-0.0735015	0.219677	0.344909	0.054757	0.253146	0.233119	0.125715	0.125063	0.29085	0.0826736	0.347939	0.237389	0.0607371	0.15112	0.119666	0.23284	0.341019	0.210674	0.365445	0.0602281	0.188706	0.123298	0.017016	0.016715	0.0351039	0.329873	0.282595	0.244929	0.2511	0.168964	-0.0525844	0.161818	0.403222	0.234669	0.105928	-0.00609135	0.132934	0.406998	0.244901	0.225168	0.331772	0.254583	0.264245	0.148758	0.161882	0.250021	0.282646
P11166	SLC2A1	-2.41761	-1.8216	-2.13681	-2.30308	-2.64116	-2.27824	-2.37191	-1.33147	-2.3536	-2.2764	-2.24801	-2.17687	-2.81021	-2.45947	-2.53143	-1.83156	-2.24799	-2.31407	-2.09333	-2.56301	-2.28714	-1.80461	-2.23899	-1.66893	-2.25137	-1.93032	-2.49593	-2.55562	-2.4786	-2.55645	-2.00057	-2.24956	-2.14312	-2.32449	-2.63373	-0.435328	-1.98177	-2.31105	-2.40632	-1.63918	-2.02463	-1.99152	-2.35849	-2.15135	-2.25525	-2.17748	-2.12208	-1.93391
P11169	SLC2A3	-0.071341	-0.0714452	-0.0705412	-0.0720964	-0.0721662	-0.0722391	-0.0722065	-0.0726154	-0.0718019	-0.0710434	-0.072789	-0.0713537	-0.0705533	-0.0704325	-0.0710548	-0.0713588	-0.0713768	-0.0722234	-0.0711924	-0.0705648	-0.0705155	-0.0709777	-0.0720632	-0.072483	-0.0735226	-0.0722858	-0.0666033	-0.0683238	-0.0740938	-0.0712652	-0.0701293	-0.0708997	-0.0700396	-0.0667255	-0.0654228	-0.0757322	-0.0653662	-0.0710484	-0.072427	-0.0696482	-0.0732392	-0.0716616	-0.481989	-0.0713852	-0.0714106	-0.0723681	-0.0719338	-0.070381
P11171	EPB41	0.00706378	0.118818	-0.125468	-0.143582	-0.541301	-0.544787	-0.316889	-0.442036	0.13005	0.110636	0.101543	-0.380643	-0.239894	-0.400311	-0.357547	-0.443335	-0.183485	-0.325373	-0.266892	-0.289553	-0.366683	-0.55448	-0.448703	-0.380865	-0.323237	-0.605202	-0.289379	-0.289155	-0.341333	-0.739317	-0.458028	-0.564401	0.0617675	-0.730784	-0.91466	0.0728467	-0.5872	-0.273807	-0.44592	-0.538943	-0.336519	-0.444562	-0.498404	-0.612639	0.3364	-0.217274	-0.0350693	-0.156982
P11172	UMPS	-0.238529	-0.342318	-0.153979	-0.443433	-0.770528	-0.596298	-0.869663	-0.806617	-1.46475	-1.43752	-1.69674	-1.48149	-0.194623	-0.337381	-0.295209	-0.218178	-0.153073	-0.105594	-0.23816	-0.584161	-0.166391	-0.85988	-0.286716	-0.351167	0.292752	-0.484308	0.259827	0.169388	-0.235658	-0.387956	-0.249052	-0.361274	-0.208142	0.226341	0.210922	0.0242739	0.21341	-0.0828609	-0.0976251	0.217614	0.0239123	-0.189425	-0.284785	-0.0787897	-0.318245	-0.140155	-0.377496	-0.277974
P11177	PDHB	0.420537	0.428534	0.56495	-0.126339	0.331304	0.651707	-0.0596107	0.13888	0.172984	0.535245	0.129855	0.060866	0.524099	0.696967	0.435607	0.403436	-0.0280528	0.097523	-0.0865439	0.44002	0.225282	0.275276	0.342653	0.0311988	0.438886	-0.0439491	0.430799	0.337129	0.134628	0.407177	0.504452	0.0947803	0.309482	0.47048	0.443301	0.102931	0.226756	0.183074	0.0678355	0.203065	0.0126512	0.201306	0.383101	0.254677	-0.0835801	-0.063137	0.257258	0.320477
P11182	DBT	0.0551773	0.249555	0.308646	0.112811	-0.181413	0.16102	0.0128755	0.0462793	-0.318879	-0.117615	-0.273525	-0.258713	0.176741	0.231634	0.26444	0.0719006	0.151312	0.0752393	0.0813179	-0.14072	0.0847709	0.120003	0.145859	0.30417	0.223244	0.161865	-0.0123613	0.0471624	0.255261	-0.00882077	0.17517	-0.0783113	-0.164028	0.16138	0.209231	0.160026	0.278162	0.00695717	0.139038	-0.0696482	-0.0732392	-0.0716616	0.222788	-0.0452712	0.155765	0.237459	0.272642	0.304822
P11215	ITGAM	-0.147591	-0.37429	-0.299132	-0.425354	-0.620887	-0.554297	-0.148371	0.742054	-0.32371	0.0458072	-0.556256	0.614885	-0.227763	-0.370216	-0.151094	-0.251877	-0.151636	-0.194171	-0.141587	0.135001	0.173073	0.748372	-0.164406	0.0430075	0.281004	0.0074097	-0.206661	-0.133186	0.0279765	-0.469149	-0.396297	-0.265088	-0.587463	-0.466426	-0.360503	0.138824	0.0376636	-0.475442	-0.350851	-0.0696482	-0.0732392	-0.0716616	-0.361093	-0.533241	-0.58367	0.267149	-0.358645	-0.280376
P11216	PYGB	0.0112014	-0.277322	0.219677	0.111529	0.798594	0.891319	0.396605	0.043348	0.212906	0.0904631	0.695664	0.112424	0.75782	0.592682	0.231046	0.158054	0.190592	0.432259	0.34553	-0.323501	0.0340133	0.474414	0.845575	0.480932	0.104865	0.286813	0.404188	0.637726	0.399033	0.00640092	0.126717	0.349045	0.293824	0.310268	0.510667	0.53634	0.861192	0.46445	-0.0797615	0.517421	-0.0124721	-0.117261	0.532217	0.0220704	0.10663	-0.0174054	0.32778	0.395347
P11217	PYGM	-0.523839	-0.772064	-0.785734	-0.525401	-0.364403	-0.23804	-0.154103	0.149257	-0.69764	-0.371559	-0.477287	-0.134529	0.00318733	0.122816	-0.121211	-0.180993	-0.143706	-0.193316	-0.0825016	-0.54928	-0.303296	0.0864053	0.0117217	-0.213907	0.254439	-0.265279	0.239846	0.172718	0.222891	-0.24018	-0.252846	-0.250228	-0.535542	-0.117073	0.0142922	0.310106	0.396911	-0.383698	-0.252154	-0.521077	-0.258262	-0.57346	0.211533	-0.224967	-0.340518	0.0622101	0.0720472	-0.227491
P11233	RALA	0.484067	0.335212	0.0951304	-0.186478	0.290925	-0.176399	0.19407	0.338098	-0.131881	0.131725	0.0599805	0.527137	0.119441	0.202297	0.273413	0.075548	0.136128	-0.0129313	0.108138	0.0452491	0.10666	0.432523	0.279009	0.40105	0.225412	0.183466	-0.206451	-0.224332	-0.245256	0.143947	0.0586805	0.0454318	-0.0803911	0.107386	-0.17873	-0.0687262	0.238547	0.257318	-0.0765702	0.530179	-0.591165	0.0402797	-0.0232233	0.0209165	0.205961	-0.0909575	-0.187069	0.0974318
P11234	RALB	-0.071341	-0.0714452	-0.0705412	-0.0720964	-0.0721662	-0.0722391	-0.0722065	-0.0726154	-0.0718019	-0.0710434	-0.072789	-0.0713537	-0.0705533	-0.0704325	-0.0710548	-0.0713588	-0.0713768	-0.0722234	-0.0711924	-0.0705648	-0.0705155	-0.0709777	-0.0720632	-0.072483	-0.0735226	-0.0722858	-0.0666033	-0.0683238	-0.0740938	-0.0712652	-0.0701293	-0.0708997	-0.0700396	-0.0667255	-0.0654228	-0.0757322	-0.0653662	-0.0710484	-0.072427	-0.0696482	-0.0732392	-0.0716616	-0.0720372	0.111982	-0.0714106	-0.0723681	-0.0719338	-0.070381
P11277	SPTB	-1.14763	-0.851054	-1.14048	-0.856568	-1.31536	-1.79495	-1.9155	-0.594219	0.202553	0.324492	0.192792	0.480849	-0.597263	-0.504525	-0.570587	-0.199195	-0.276201	-0.22388	-0.179062	-0.105459	-0.357176	-0.126078	-0.821439	0.228463	-0.511482	-0.785539	-1.1308	-1.57894	-1.74964	-0.695155	-0.924081	-0.842784	-0.0259255	-0.998785	-0.943222	-0.772393	-0.612028	-0.697491	-1.04877	-1.39674	-0.152218	-1.06482	0.022324	0.284302	-0.690007	-0.545903	-0.639456	-0.396266
P11279	LAMP1	-0.179789	0.162697	-0.0319205	0.267638	0.372681	0.0511766	0.116351	0.829311	-0.138439	0.305562	0.055918	0.545298	0.444822	0.387283	0.0197182	0.61317	0.140628	0.341019	0.0422968	0.504213	0.546143	0.773818	0.254044	-0.089211	0.2591	0.251764	0.14124	0.311182	0.273357	0.135101	-0.0747547	0.250195	-0.0402794	0.18625	0.161838	0.11382	0.0986898	0.17286	0.447924	0.00402376	0.492857	0.23454	-0.0274411	0.335481	0.098037	0.134952	0.538297	0.507639
P11310	ACADM	0.337328	0.210123	0.545011	0.282278	-0.218451	0.378106	-0.0541188	0.0696902	0.236088	0.296186	0.0336711	-0.212226	0.620818	0.160285	0.40261	0.571912	0.216165	0.188565	0.0211045	0.291108	0.0137534	0.107927	0.262438	-0.450536	0.0548471	-0.143451	0.584682	0.239572	0.246656	-0.00125717	0.688191	0.252747	0.130082	0.29891	0.35292	-0.298241	0.0558451	0.248912	0.174717	0.300547	0.027573	0.376389	0.504746	-0.0900581	0.170324	-0.0571754	0.187318	0.24561
P11387	TOP1	-0.288674	-0.252616	0.0177328	0.0839326	-0.0342928	-0.00870639	-0.0169081	0.308453	0.16935	0.113927	0.250079	0.00928874	0.00503857	-0.0936316	-0.0895484	0.136222	0.143233	0.0624287	0.0534283	0.135001	0.262902	0.215737	0.386106	0.520045	-0.0243223	0.51646	0.278666	0.197457	0.234043	0.288047	0.16542	0.271574	0.154265	0.137473	0.343324	0.0728467	0.14802	-0.3982	-0.633129	0.192083	0.178777	0.124719	0.0164552	0.0282794	-0.202638	0.0465325	0.0501601	-0.0700129
P11413	G6PD	-0.378889	-0.191807	0.210217	-0.281091	-0.395253	-0.189253	-0.231571	0.277169	-0.173569	-0.0889296	-0.263123	0.0481346	-0.155365	-0.113668	-0.108942	-0.258326	-0.120883	0.169082	-0.182173	-0.205312	-0.112989	0.0212559	-0.24187	-0.155671	0.0635689	-0.193203	-0.389388	-0.189586	0.133084	-0.312287	-0.20165	-0.0280063	-0.183277	-0.185305	-0.253041	0.707474	-0.382398	-0.18379	-0.312344	-0.117021	-0.125315	-0.278426	-5.90782e-18	-0.41129	-0.102288	0.220996	0.114026	-0.0342033
P11488	GNAT1	-2.30182	-1.95602	-2.02129	-1.91348	-2.30758	-2.3731	-2.22058	-1.8496	-2.90631	-2.58235	-2.53706	-2.78627	-2.28721	-2.27378	-2.42233	-2.23034	-2.22278	-2.33003	-2.27438	-2.76457	-2.5215	-2.46565	-2.52126	-2.26532	-2.28633	-2.25176	-2.10591	-2.13058	-2.0012	-2.65942	-2.65896	-2.51289	-2.36425	-2.66359	-2.63373	-0.396669	-2.29835	-2.479	-2.23279	-2.7051	-2.55762	-2.45192	-2.59799	-2.22015	-2.47717	-2.25384	-2.16753	-2.12387
P11498	PC	-0.434057	-0.340604	0.113599	-0.471149	0.0272966	-0.0767408	-0.00233209	0.0447697	-0.516163	-0.263613	-0.469924	-0.31781	0.0441731	-0.0267314	-0.0458195	-0.719875	-0.481691	-0.560264	-0.679484	-0.339123	-0.150843	-0.302301	-0.145346	-0.0535316	-0.0439979	0.0106653	-0.259016	-0.347178	-0.406832	-0.205361	-0.451002	-0.330176	-0.552695	-0.560435	-0.580992	0.0587952	-0.44491	-0.454358	-0.275754	-0.723844	-0.331083	-0.304466	-0.26089	-0.0112219	-0.381049	-0.121222	-0.250533	-0.149738
P11532	DMD	0.0355427	0.281621	-0.0109823	-0.0537665	-0.485069	-0.263607	-0.386958	-0.426631	0.0136218	0.285041	-0.0154392	0.156301	-0.187578	0.555065	0.190774	-0.330365	-0.359168	-0.51649	-0.287025	-0.245269	-0.117071	-0.129106	-0.119558	0.0219949	0.262917	0.0284141	-0.162544	-0.192823	-0.202579	-0.708909	0.380882	-0.147131	-0.209315	-0.0813849	-0.147787	-0.861826	0.288674	-0.0576484	-0.114159	-0.0821513	-0.427481	-0.227347	0.000799755	-0.336124	-0.206684	-0.162155	-0.177085	0.0943683
P11586	MTHFD1	0.352497	0.148602	0.145714	0.112811	-0.0886889	0.38475	0.28667	-0.347857	0.397867	0.376273	0.376367	0.140768	0.143467	0.105372	0.246928	0.268334	0.467054	0.324568	0.149481	0.206616	0.159463	-0.132085	0.30563	0.448753	0.145308	0.567728	0.22403	0.181657	0.0429625	0.423521	0.1073	0.444766	0.308233	0.280398	0.375037	0.231327	0.338166	0.15103	0.0931833	0.254931	0.386592	0.204375	0.350248	0.127684	0.0890569	0.0225543	0.15163	0.268612
P11678	EPX	-0.071341	-0.0714452	-0.0705412	-0.0720964	-0.0721662	-0.0722391	-0.0722065	-0.0726154	-0.0718019	-0.0710434	-0.072789	-0.0713537	-0.0705533	-0.0704325	-0.0710548	-0.0713588	-0.0713768	-0.0722234	-0.0711924	-0.0705648	-0.0705155	-0.0709777	-0.0720632	-0.072483	-0.0735226	-0.0722858	-0.712981	-0.967236	0.935298	-0.0712652	-0.0701293	-0.0708997	-0.0700396	-0.0667255	-0.0654228	-0.0757322	-0.0653662	-0.0710484	-0.072427	-0.0696482	-0.0732392	-0.0716616	-0.0720372	-0.0713852	-0.0714106	-0.0723681	-0.0719338	-0.070381
P11717	IGF2R	0.00210863	0.212456	1.0689	-0.00188186	-0.240121	0.418763	0.29278	-0.276072	0.16317	0.669149	0.201089	0.506376	-0.0108062	-0.0601004	-0.398986	-0.133073	0.0667431	-0.0198081	-0.336992	0.147576	-0.301417	0.20551	-0.205771	-0.158405	-0.230612	0.0750826	-0.151251	-0.341082	0.113767	-0.612787	-0.507789	-0.577693	0.233467	0.331882	-0.462785	-0.145725	-0.0706163	0.158319	0.0916839	0.204413	0.188274	0.0887776	-0.0608521	0.118081	-0.284216	-0.244673	0.0769069	-0.0541837
P11766	ADH5	0.243916	0.153891	0.100896	-0.108817	0.226364	0.391193	0.483738	0.0862576	0.340625	-0.213502	0.304052	0.0565822	0.0518638	0.148065	-0.0135767	0.101428	0.0614907	0.313577	-0.385748	0.216972	0.0564933	-0.203567	0.119254	-0.574515	0.19845	-0.33138	-0.144491	0.257605	-0.424291	0.0147064	-0.0544849	0.0864926	0.045289	0.0165761	-0.0670685	0.143053	0.0346083	0.113382	-0.376148	0.173695	-0.309609	0.163104	0.0682644	-0.143617	0.168698	0.180003	0.0805508	-0.377549
P11802	CDK4	0.157612	0.0184823	-0.17918	0.0911625	0.0269964	-0.00300303	0.0545454	-0.0223448	0.419417	0.0560895	0.597736	0.448192	0.0394345	0.121922	-0.00893812	0.194113	0.187586	0.193442	0.180949	0.0364762	0.0503196	0.0702388	0.0227521	0.00850642	-0.00968211	0.0311812	0.0851172	-0.00126772	0.148907	0.108679	0.0851376	0.237149	0.122515	-0.0488927	-0.0386803	-0.0450578	0.146684	0.0595826	0.00117102	0.0224382	0.105376	0.0924258	0.0379546	0.0862635	-0.101976	0.0502041	-0.0976305	-0.326991
[truncated: 3,117 more rows]
[truncated: 52 more columns]
