# Supplementary material for: Proteomics of Primary Uveal Melanoma: Insights into Metastasis and Protein Biomarkers
Source: Cancers (Basel). 2021 Jul 14;13(14):3520. doi: 10.3390/cancers13143520 (PMC8307952; doi:10.3390/cancers13143520)
Supplement: Supplementary file 1 [file cancers-13-03520-s001.zip › Table S4. Average Relative Protein Abundance, Metastasizing pUM.xlsx]

## Sheet: Table S4-AveMet n53
Supplementary Table S4. Metastatasizing pUM, n=53 Average Relative Protein Abundance Total Proteins Quantified = 3935; Median Protein iTRAQ Ratio =0.960; Mean Protein iTRAQ Ratio = 0.923; Standard Deviation (SD) = 0.376 Yellow, ≥ 1SD from the mean; Orange, ≥ 2SD from the mean
UniProt Accession	Gene Name	Protein (Listed in Decreasing Abundance)	Linear Ratio Met pUM/Control	SEM1	adjusted p-Value2	Sample Frequency	Imputation3 (%)
Proteins Significantly Elevated Relative to Normal Choroid (n=232)
P23297	S100A1	Protein S100-A1	2.83601	0.0902258	3.05982e-16	50	6
P31949	S100A11	Protein S100-A11	2.50291	0.0477027	4.46727e-25	53	0
P78417	GSTO1	Glutathione S-transferase omega-1	2.44474	0.052345	9.58835e-23	53	0
P08758	ANXA5	Annexin A5	2.42984	0.0531602	2.55616e-22	53	0
P07686	HEXB	Beta-hexosaminidase subunit beta	2.24864	0.0635944	2.30992e-17	53	0
P06865	HEXA	Beta-hexosaminidase subunit alpha	2.06058	0.0600578	2.09838e-16	53	0
P05413	FABP3	Fatty acid-binding protein, heart	2.03319	0.0640652	4.64992e-15	53	0
P22392	NME2	Nucleoside diphosphate kinase B	1.98208	0.0317054	4.96704e-28	49	8
O15400	STX7	Syntaxin-7	1.97549	0.0628667	1.05408e-14	53	0
P30536	TSPO	Translocator protein	1.96248	0.0525236	1.85862e-17	53	0
P07093	SERPINE2	Glia-derived nexin	1.95591	0.0653815	6.92711e-14	53	0
P23381	WARS1	Tryptophan--tRNA ligase, cytoplasmic	1.94534	0.0801033	5.80369e-11	53	0
P61604	HSPE1	10 kDa heat shock protein, mitochondrial	1.93624	0.0540128	1.18777e-16	53	0
P06748	NPM1	Nucleophosmin	1.93278	0.0385664	1.18209e-22	53	0
P51810	GPR143	G-protein coupled receptor 143	1.88708	0.0629558	1.25169e-13	53	0
P04439	HLA-A	HLA class I histocompatibility antigen, A alpha chain	1.87366	0.0712961	9.97586e-12	53	0
O75340	PDCD6	Programmed cell death protein 6	1.84255	0.0364411	2.84847e-22	53	0
O00584	RNASET2	Ribonuclease T2	1.83035	0.0742638	4.53119e-11	50	6
P02545	LMNA	Prelamin-A/C	1.82535	0.0554072	9.94502e-15	53	0
P51606	RENBP	N-acylglucosamine 2-epimerase	1.79655	0.0418708	6.17492e-19	53	0
P14174	MIF	Macrophage migration inhibitory factor	1.78483	0.105228	1.40767e-06	53	0
P04062	GBA	Lysosomal acid glucosylceramidase	1.76575	0.0336745	2.32044e-22	53	0
Q9BUP0	EFHD1	EF-hand domain-containing protein D1	1.76448	0.0537987	2.75291e-14	53	0
Q9H7B2	RPF2	Ribosome production factor 2 homolog	1.76244	0.0382485	4.70033e-21	47	11
P62937	PPIA	Peptidyl-prolyl cis-trans isomerase A	1.7623	0.0217836	8.53611e-31	53	0
Q9UBR2	CTSZ	Cathepsin Z	1.76203	0.063434	6.69646e-12	53	0
P42766	RPL35	60S ribosomal protein L35	1.75939	0.0382639	8.66296e-21	48	9
Q99643	SDHC	Succinate dehydrogenase cytochrome b560 subunit, mitochondrial	1.75562	0.0487641	3.87915e-16	50	6
P30405	PPIF	Peptidyl-prolyl cis-trans isomerase F, mitochondrial	1.73172	0.046396	4.54696e-16	53	0
Q9NR45	NANS	Sialic acid synthase	1.72439	0.0329107	5.69114e-22	53	0
Q14376	GALE	UDP-glucose 4-epimerase	1.71509	0.0494875	9.1418e-15	53	0
P49207	RPL34	60S ribosomal protein L34	1.70547	0.0332338	6.12146e-22	50	6
O00115	DNASE2	Deoxyribonuclease-2-alpha	1.69438	0.0593018	4.04399e-13	44	17
P55769	SNU13	NHP2-like protein 1	1.68158	0.0440607	5.32253e-16	53	0
Q00796	SORD	Sorbitol dehydrogenase	1.67572	0.0392261	8.23435e-18	53	0
P18077	RPL35A	60S ribosomal protein L35a	1.67449	0.0565281	1.19542e-13	43	19
P31939	ATIC	Bifunctional purine biosynthesis protein ATIC	1.67289	0.0317599	1.52846e-21	53	0
P16401	H1-5	Histone H1.5	1.67163	0.066372	4.66479e-10	53	0
P00403	MT-CO2	Cytochrome c oxidase subunit 2	1.66941	0.0469195	8.76988e-15	53	0
Q96AG4	LRRC59	Leucine-rich repeat-containing protein 59	1.66669	0.0319872	2.8412e-21	53	0
P61769	B2M	Beta-2-microglobulin	1.66177	0.0792938	1.37374e-08	47	11
P07737	PFN1	Profilin-1	1.65053	0.0293295	1.69822e-22	53	0
P10599	TXN	Thioredoxin	1.64663	0.0369594	3.13448e-18	53	0
Q9Y3U8	RPL36	60S ribosomal protein L36	1.64211	0.0457709	1.18243e-14	53	0
P83731	RPL24	60S ribosomal protein L24	1.63478	0.0396457	8.54898e-17	53	0
P40429	RPL13A	60S ribosomal protein L13a	1.6334	0.0286493	1.59003e-22	53	0
O76021	RSL1D1	Ribosomal L1 domain-containing protein 1	1.62285	0.0295756	1.07619e-21	53	0
O00560	SDCBP	Syntenin-1	1.61731	0.056591	3.19872e-11	53	0
P62857	RPS28	40S ribosomal protein S28	1.61614	0.0411801	8.77053e-16	53	0
P52597	HNRNPF	Heterogeneous nuclear ribonucleoprotein F	1.61582	0.0204535	1.61021e-28	53	0
P19338	NCL	Nucleolin	1.61232	0.0317915	4.13243e-20	53	0
Q86UY8	NT5DC3	5~-nucleotidase domain-containing protein 3	1.61101	0.0391224	1.64853e-16	53	0
P50914	RPL14	60S ribosomal protein L14	1.60636	0.0399515	4.58941e-16	53	0
P36957	DLST	Dihydrolipoyllysine-residue succinyltransferase component of 2-oxoglutarate dehydrogenase complex, mitochondrial	1.60618	0.0345183	1.65868e-18	53	0
Q58FF6	HSP90AB4P	Putative heat shock protein HSP 90-beta 4	1.59491	0.0422954	6.39382e-15	53	0
Q92820	GGH	Gamma-glutamyl hydrolase	1.59446	0.0491813	1.07202e-12	53	0
P63241	EIF5A	Eukaryotic translation initiation factor 5A-1	1.59229	0.0332446	7.7541e-19	53	0
P52565	ARHGDIA	Rho GDP-dissociation inhibitor 1	1.591	0.0404085	1.49841e-15	53	0
P60983	GMFB	Glia maturation factor beta	1.59005	0.0288597	2.54835e-21	53	0
Q02878	RPL6	60S ribosomal protein L6	1.58623	0.030012	1.65115e-20	53	0
P11940	PABPC1	Polyadenylate-binding protein 1	1.58353	0.027298	3.61942e-22	53	0
Q07021	C1QBP	Complement component 1 Q subcomponent-binding protein, mitochondrial	1.5799	0.046237	2.75049e-13	53	0
P62750	RPL23A	60S ribosomal protein L23a	1.5761	0.0359877	4.39728e-17	53	0
O14556	GAPDHS	Glyceraldehyde-3-phosphate dehydrogenase, testis-specific	1.57506	0.0476859	9.51355e-13	53	0
P35232	PHB	Prohibitin	1.57461	0.0265247	1.8758e-22	53	0
Q5VIR6	VPS53	Vacuolar protein sorting-associated protein 53 homolog	1.57203	0.0378111	1.03036e-17	44	17
P08670	VIM	Vimentin	1.5689	0.0825423	1.69537e-06	53	0
Q8IVF2	AHNAK2	Protein AHNAK2	1.56062	0.0875182	1.09509e-06	44	17
P62081	RPS7	40S ribosomal protein S7	1.55695	0.0253504	8.41117e-23	53	0
O75368	SH3BGRL	SH3 domain-binding glutamic acid-rich-like protein	1.55455	0.0446934	3.00574e-13	53	0
Q53H82	LACTB2	Endoribonuclease LACTB2	1.55036	0.034372	3.24978e-17	53	0
Q15363	TMED2	Transmembrane emp24 domain-containing protein 2	1.5501	0.0403503	1.17685e-14	53	0
P22087	FBL	rRNA 2~-O-methyltransferase fibrillarin	1.54774	0.0308194	5.04525e-19	53	0
O75843	AP1G2	AP-1 complex subunit gamma-like 2	1.54313	0.0435111	8.21663e-14	50	6
Q13563	PKD2	Polycystin-2	1.5399	0.0459995	7.33827e-14	44	17
Q9BYD3	MRPL4	39S ribosomal protein L4, mitochondrial	1.53795	0.0374558	7.75746e-17	45	15
O95757	HSPA4L	Heat shock 70 kDa protein 4L	1.53634	0.0429098	1.02431e-13	51	4
Q96DB5	RMDN1	Regulator of microtubule dynamics protein 1	1.53591	0.0468606	3.38929e-12	53	0
Q96M27	PRRC1	Protein PRRC1	1.53007	0.0483886	1.87774e-12	47	11
P10321	HLA-C	HLA class I histocompatibility antigen, C alpha chain	1.52767	0.0668049	5.94194e-08	52	2
P39019	RPS19	40S ribosomal protein S19	1.52649	0.0322827	1.21233e-17	53	0
P21964	COMT	Catechol O-methyltransferase	1.52562	0.049965	3.89165e-11	53	0
Q9BXD5	NPL	N-acetylneuraminate lyase	1.52477	0.0655259	1.62904e-08	48	9
A4D1P6	WDR91	WD repeat-containing protein 91	1.51955	0.0402549	5.53347e-14	53	0
Q13505	MTX1	Metaxin-1	1.51882	0.0445231	1.17049e-12	52	2
O14773	TPP1	Tripeptidyl-peptidase 1	1.51823	0.0427885	4.54425e-13	53	0
P62266	RPS23	40S ribosomal protein S23	1.51797	0.0305277	2.30356e-18	53	0
Q13423	NNT	NAD(P) transhydrogenase, mitochondrial	1.51607	0.0415875	1.97404e-13	53	0
Q9HD67	MYO10	Unconventional myosin-X	1.5121	0.0393992	4.02173e-14	53	0
Q9BV36	MLPH	Melanophilin	1.51085	0.0492709	5.156e-11	53	0
P61353	RPL27	60S ribosomal protein L27	1.50657	0.0445433	3.00583e-12	53	0
Q8IV08	PLD3	5~-3~ exonuclease PLD3	1.50621	0.0527875	4.6488e-10	53	0
P33121	ACSL1	Long-chain-fatty-acid--CoA ligase 1	1.50251	0.0575528	5.43306e-09	53	0
Q9NW13	RBM28	RNA-binding protein 28	1.50098	0.041071	8.64099e-15	43	19
Q86WA6	BPHL	Valacyclovir hydrolase	1.49836	0.0430605	1.59066e-12	53	0
Q9Y3D6	FIS1	Mitochondrial fission 1 protein	1.49546	0.0446622	2.35381e-12	50	6
P36578	RPL4	60S ribosomal protein L4	1.49529	0.0318045	4.92016e-17	53	0
P01903	HLA-DRA	HLA class II histocompatibility antigen, DR alpha chain	1.4946	0.0723259	1.21275e-06	53	0
P51991	HNRNPA3	Heterogeneous nuclear ribonucleoprotein A3	1.49377	0.0501067	1.91262e-10	53	0
P62899	RPL31	60S ribosomal protein L31	1.49356	0.0274376	1.64076e-19	53	0
Q9Y4W6	AFG3L2	AFG3-like protein 2	1.49316	0.0292245	2.15035e-18	53	0
P30837	ALDH1B1	Aldehyde dehydrogenase X, mitochondrial	1.49126	0.0563149	5.03554e-09	53	0
P48426	PIP4K2A	Phosphatidylinositol 5-phosphate 4-kinase type-2 alpha	1.4909	0.0375573	2.63679e-14	53	0
O00567	NOP56	Nucleolar protein 56	1.49068	0.0314864	4.53975e-17	53	0
P98179	RBM3	RNA-binding protein 3	1.49065	0.0405795	3.33817e-14	46	13
P62280	RPS11	40S ribosomal protein S11	1.49008	0.0413729	6.96622e-13	53	0
O75439	PMPCB	Mitochondrial-processing peptidase subunit beta	1.48971	0.0273901	1.99779e-19	53	0
Q7L014	DDX46	Probable ATP-dependent RNA helicase DDX46	1.48579	0.0385512	6.24467e-14	52	2
P68104	EEF1A1	Elongation factor 1-alpha 1	1.48547	0.0267441	1.04022e-19	53	0
P13639	EEF2	Elongation factor 2	1.48278	0.0236908	8.56253e-22	53	0
Q13637	RAB32	Ras-related protein Rab-32	1.48225	0.0398552	3.19553e-13	53	0
Q9BVP2	GNL3	Guanine nucleotide-binding protein-like 3	1.48185	0.0463291	5.79344e-12	47	11
Q562R1	ACTBL2	Beta-actin-like protein 2	1.47778	0.0764144	1.26111e-06	45	15
O00541	PES1	Pescadillo homolog	1.47537	0.0466404	2.54975e-12	43	19
Q12905	ILF2	Interleukin enhancer-binding factor 2	1.47463	0.0234522	1.04564e-21	53	0
P46926	GNPDA1	Glucosamine-6-phosphate isomerase 1	1.47406	0.0301975	2.88085e-17	53	0
P61225	RAP2B	Ras-related protein Rap-2b	1.46963	0.0397852	6.27667e-13	53	0
Q13630	TSTA3	GDP-L-fucose synthase	1.46882	0.0372574	7.51998e-14	53	0
O95453	PARN	Poly(A)-specific ribonuclease PARN	1.46506	0.0281312	8.43722e-20	44	17
Q9H299	SH3BGRL3	SH3 domain-binding glutamic acid-rich-like protein 3	1.46206	0.0569433	2.35287e-08	53	0
Q99598	TSNAX	Translin-associated protein X	1.45667	0.0316434	5.36281e-16	53	0
P40926	MDH2	Malate dehydrogenase, mitochondrial	1.45582	0.0331366	3.0056e-15	53	0
P16219	ACADS	Short-chain specific acyl-CoA dehydrogenase, mitochondrial	1.45367	0.0397678	1.58321e-12	53	0
Q9BY32	ITPA	Inosine triphosphate pyrophosphatase	1.45292	0.0518155	3.40696e-09	53	0
Q08945	SSRP1	FACT complex subunit SSRP1	1.45183	0.021806	3.16169e-22	53	0
P29692	EEF1D	Elongation factor 1-delta	1.45117	0.0272337	2.75e-18	53	0
Q16698	DECR1	2,4-dienoyl-CoA reductase, mitochondrial	1.44928	0.049026	9.43127e-10	53	0
P61313	RPL15	60S ribosomal protein L15	1.44835	0.032596	2.78852e-15	53	0
Q16836	HADH	Hydroxyacyl-coenzyme A dehydrogenase, mitochondrial	1.44682	0.0416911	1.00718e-11	53	0
Q8NBQ5	HSD17B11	Estradiol 17-beta-dehydrogenase 11	1.44464	0.0487963	1.0512e-09	53	0
O00303	EIF3F	Eukaryotic translation initiation factor 3 subunit F	1.444	0.0372111	3.36456e-13	53	0
Q13303	KCNAB2	Voltage-gated potassium channel subunit beta-2	1.44357	0.0338568	1.45836e-14	53	0
Q8NBN3	TMEM87A	Transmembrane protein 87A	1.44356	0.0380087	1.90382e-13	49	8
P24557	TBXAS1	Thromboxane-A synthase	1.44256	0.0529958	2.1222e-09	47	11
Q15274	QPRT	Nicotinate-nucleotide pyrophosphorylase [carboxylating]	1.44194	0.0383384	1.01168e-12	53	0
Q01105	SET	Protein SET	1.44179	0.0320611	2.42819e-15	53	0
P51159	RAB27A	Ras-related protein Rab-27A	1.44	0.0369997	3.60447e-13	53	0
P11279	LAMP1	Lysosome-associated membrane glycoprotein 1	1.43757	0.0428618	3.97461e-11	53	0
Q13185	CBX3	Chromobox protein homolog 3	1.43636	0.0463309	1.74343e-10	50	6
P05141	SLC25A5	ADP/ATP translocase 2	1.43586	0.0417611	2.03685e-11	53	0
P60228	EIF3E	Eukaryotic translation initiation factor 3 subunit E	1.43532	0.0257553	1.03453e-18	53	0
P46783	RPS10	40S ribosomal protein S10	1.43386	0.037604	9.06293e-13	53	0
P62829	RPL23	60S ribosomal protein L23	1.43358	0.0290509	1.20301e-16	53	0
P83111	LACTB	Serine beta-lactamase-like protein LACTB, mitochondrial	1.433	0.0481458	2.61141e-10	47	11
O00625	PIR	Pirin	1.43122	0.0595347	2.37725e-07	53	0
P12004	PCNA	Proliferating cell nuclear antigen	1.43017	0.0285943	8.65297e-17	53	0
Q14165	MLEC	Malectin	1.43016	0.0265725	5.45469e-18	53	0
P60842	EIF4A1	Eukaryotic initiation factor 4A-I	1.42997	0.0281749	5.09522e-17	53	0
P62805	H4C1	Histone H4	1.42935	0.0444374	1.80583e-10	53	0
P17931	LGALS3	Galectin-3	1.42899	0.0560918	5.70792e-08	52	2
P61019	RAB2A	Ras-related protein Rab-2A	1.42862	0.0297646	4.29792e-16	53	0
P35914	HMGCL	Hydroxymethylglutaryl-CoA lyase, mitochondrial	1.4285	0.0495741	1.71556e-09	50	6
P09651	HNRNPA1	Heterogeneous nuclear ribonucleoprotein A1	1.42807	0.0340991	5.27674e-14	53	0
O43752	STX6	Syntaxin-6	1.42801	0.0467142	7.83704e-10	53	0
P62917	RPL8	60S ribosomal protein L8	1.42775	0.0370789	8.5468e-13	53	0
P63173	RPL38	60S ribosomal protein L38	1.42467	0.0338635	3.11653e-15	45	15
P59998	ARPC4	Actin-related protein 2/3 complex subunit 4	1.42462	0.0276487	3.8075e-17	53	0
P18124	RPL7	60S ribosomal protein L7	1.4239	0.0326	1.53374e-14	53	0
Q9H1A3	METTL9	Methyltransferase-like protein 9	1.42124	0.0458407	6.77911e-10	53	0
P37108	SRP14	Signal recognition particle 14 kDa protein	1.42123	0.055496	4.06502e-08	50	6
P24941	CDK2	Cyclin-dependent kinase 2	1.42099	0.0586298	2.65075e-07	53	0
P13686	ACP5	Tartrate-resistant acid phosphatase type 5	1.42077	0.0668959	1.7244e-06	49	8
P62851	RPS25	40S ribosomal protein S25	1.42039	0.0255695	2.66283e-18	53	0
P22626	HNRNPA2B1	Heterogeneous nuclear ribonucleoproteins A2/B1	1.41907	0.0454753	6.16451e-10	53	0
Q9Y394	DHRS7	Dehydrogenase/reductase SDR family member 7	1.41454	0.0385463	6.61663e-12	53	0
Q16666	IFI16	Gamma-interferon-inducible protein 16	1.41419	0.0676084	5.47299e-06	53	0
Q15084	PDIA6	Protein disulfide-isomerase A6	1.41359	0.033245	6.15185e-14	53	0
Q9BYT8	NLN	Neurolysin, mitochondrial	1.41204	0.0407477	4.08391e-11	53	0
P26373	RPL13	60S ribosomal protein L13	1.40802	0.0237135	3.86212e-19	53	0
P30046	DDT	D-dopachrome decarboxylase	1.40726	0.0455021	1.20811e-09	53	0
P24534	EEF1B2	Elongation factor 1-beta	1.40678	0.0388854	1.42264e-11	53	0
P49916	LIG3	DNA ligase 3	1.40627	0.0371095	1.0387e-12	49	8
Q99523	SORT1	Sortilin	1.4046	0.041151	8.62747e-11	53	0
Q8WWM9	CYGB	Cytoglobin	1.40101	0.0673928	7.08779e-06	52	2
Q13510	ASAH1	Acid ceramidase	1.3997	0.0596705	9.43742e-07	53	0
Q9ULV4	CORO1C	Coronin-1C	1.39957	0.0270517	1.23088e-16	53	0
P53634	CTSC	Dipeptidyl peptidase 1	1.39655	0.041105	1.37823e-10	53	0
P17096	HMGA1	High mobility group protein HMG-I/HMG-Y	1.39594	0.103275	0.00239712	53	0
O00148	DDX39A	ATP-dependent RNA helicase DDX39A	1.39471	0.0447163	1.56169e-09	53	0
P13693	TPT1	Translationally-controlled tumor protein	1.39391	0.0335901	2.58292e-13	52	2
P46778	RPL21	60S ribosomal protein L21	1.39231	0.0415645	2.47094e-10	53	0
P18621	RPL17	60S ribosomal protein L17	1.39225	0.0367526	6.68718e-12	53	0
Q96AY3	FKBP10	Peptidyl-prolyl cis-trans isomerase FKBP10	1.3891	0.0490495	2.20089e-08	53	0
P60709	ACTB	Actin, cytoplasmic 1	1.3881	0.0386617	1.70169e-11	50	6
Q9NP58	ABCB6	ATP-binding cassette sub-family B member 6, mitochondrial	1.38672	0.044056	5.91681e-10	49	8
Q9P258	RCC2	Protein RCC2	1.38606	0.0346845	1.72034e-12	53	0
Q8TCT9	HM13	Minor histocompatibility antigen H13	1.38472	0.0416858	4.30418e-10	53	0
Q9UL46	PSME2	Proteasome activator complex subunit 2	1.38395	0.0580017	1.06542e-06	53	0
Q8TDZ2	MICAL1	[F-actin]-monooxygenase MICAL1	1.38355	0.059126	1.57382e-06	53	0
P30048	PRDX3	Thioredoxin-dependent peroxide reductase, mitochondrial	1.3822	0.0328758	4.14772e-13	53	0
P62244	RPS15A	40S ribosomal protein S15a	1.38208	0.0213441	6.46504e-20	53	0
Q9NY65	TUBA8	Tubulin alpha-8 chain	1.38105	0.0506871	5.92342e-09	43	19
P62701	RPS4X	40S ribosomal protein S4, X isoform	1.38044	0.0281163	2.42819e-15	53	0
P10809	HSPD1	60 kDa heat shock protein, mitochondrial	1.37969	0.0404756	2.61007e-10	53	0
P12830	CDH1	Cadherin-1	1.37866	0.0460015	8.1673e-09	53	0
Q53T59	HS1BP3	HCLS1-binding protein 3	1.37857	0.0351073	4.26697e-12	53	0
P19623	SRM	Spermidine synthase	1.37764	0.031138	1.88537e-14	48	9
Q9UBE0	SAE1	SUMO-activating enzyme subunit 1	1.37669	0.0283918	4.64992e-15	53	0
P15586	GNS	N-acetylglucosamine-6-sulfatase	1.37622	0.0332764	9.5761e-13	53	0
P19971	TYMP	Thymidine phosphorylase	1.37465	0.0712878	5.18248e-05	53	0
Q9UHL4	DPP7	Dipeptidyl peptidase 2	1.37337	0.0461367	1.18044e-08	53	0
Q9Y3D9	MRPS23	28S ribosomal protein S23, mitochondrial	1.37208	0.027267	1.88002e-16	47	11
P62854	RPS26	40S ribosomal protein S26	1.37159	0.0385332	1.09733e-10	53	0
P58546	MTPN	Myotrophin	1.37131	0.037323	4.43227e-11	53	0
Q9Y262	EIF3L	Eukaryotic translation initiation factor 3 subunit L	1.36828	0.0241344	2.77537e-17	53	0
P22234	PAICS	Multifunctional protein ADE2	1.36668	0.0337884	3.12493e-12	53	0
P49411	TUFM	Elongation factor Tu, mitochondrial	1.36633	0.0374846	7.1065e-11	53	0
P41250	GARS1	Glycine--tRNA ligase	1.36627	0.0250337	1.24895e-16	53	0
P26368	U2AF2	Splicing factor U2AF 65 kDa subunit	1.36511	0.020427	6.00539e-20	53	0
P40939	HADHA	Trifunctional enzyme subunit alpha, mitochondrial	1.36495	0.0254014	2.41835e-16	53	0
Q02543	RPL18A	60S ribosomal protein L18a	1.36468	0.0283941	1.26919e-14	53	0
P62277	RPS13	40S ribosomal protein S13	1.36404	0.0278173	6.59235e-15	53	0
P26599	PTBP1	Polypyrimidine tract-binding protein 1	1.36371	0.0292844	3.921e-14	53	0
P46940	IQGAP1	Ras GTPase-activating-like protein IQGAP1	1.3601	0.0330817	2.67338e-12	53	0
P23193	TCEA1	Transcription elongation factor A protein 1	1.35859	0.0490552	4.64976e-08	49	8
P16435	POR	NADPH--cytochrome P450 reductase	1.35634	0.0326634	2.41423e-12	53	0
P05388	RPLP0	60S acidic ribosomal protein P0	1.35615	0.0271396	5.5687e-15	53	0
P57740	NUP107	Nuclear pore complex protein Nup107	1.35602	0.0214136	9.22607e-19	53	0
P51148	RAB5C	Ras-related protein Rab-5C	1.3545	0.0242685	1.19733e-16	53	0
Q13011	ECH1	Delta(3,5)-Delta(2,4)-dienoyl-CoA isomerase, mitochondrial	1.3535	0.0308191	4.83146e-13	53	0
Q12931	TRAP1	Heat shock protein 75 kDa, mitochondrial	1.35347	0.0224415	7.34977e-18	53	0
P62913	RPL11	60S ribosomal protein L11	1.35268	0.0241912	8.90126e-17	52	2
P54652	HSPA2	Heat shock-related 70 kDa protein 2	1.35228	0.0491734	1.6498e-07	53	0
P13473	LAMP2	Lysosome-associated membrane glycoprotein 2	1.35112	0.0518086	5.2771e-07	53	0
Q9UH65	SWAP70	Switch-associated protein 70	1.35106	0.0281345	2.94667e-14	53	0
Q9Y3Z3	SAMHD1	Deoxynucleoside triphosphate triphosphohydrolase SAMHD1	1.35094	0.0407342	1.9938e-09	53	0
O75828	CBR3	Carbonyl reductase [NADPH] 3	1.35086	0.0400548	5.9277e-10	50	6
O43598	DNPH1	2~-deoxynucleoside 5~-phosphate N-hydrolase 1	1.3477	0.0350102	3.74395e-11	53	0
Q5SY16	NOL9	Polynucleotide 5~-hydroxyl-kinase NOL9	1.34667	0.0509942	1.33308e-07	47	11
Q9UNK0	STX8	Syntaxin-8	1.34646	0.0357165	7.31647e-11	53	0
O15145	ARPC3	Actin-related protein 2/3 complex subunit 3	1.34568	0.0341572	2.11677e-11	53	0
Q9UHQ9	CYB5R1	NADH-cytochrome b5 reductase 1	1.34502	0.0227706	2.91824e-17	53	0
Proteins Not Altered Significantly Relative to Normal Choroid4
O15533	TAPBP	Tapasin	2.22674	0.106179	2.22404e-11	41	23
Q96BY6	DOCK10	Dedicator of cytokinesis protein 10	1.96561	0.0687789	5.35566e-15	42	21
P38571	LIPA	Lysosomal acid lipase/cholesteryl ester hydrolase	1.94275	0.0810109	1.23356e-13	35	34
O60522	TDRD6	Tudor domain-containing protein 6	1.64097	0.0703497	3.79872e-19	13	75
Q9NYL4	FKBP11	Peptidyl-prolyl cis-trans isomerase FKBP11	1.62902	0.0676589	5.4486e-12	34	36
P08631	HCK	Tyrosine-protein kinase HCK	1.62841	0.0666166	3.86515e-16	20	62
Q9HB40	SCPEP1	Retinoid-inducible serine carboxypeptidase	1.61753	0.053355	1.41013e-14	37	30
Q92979	EMG1	Ribosomal RNA small subunit methyltransferase NEP1	1.59143	0.0480913	7.28699e-16	36	32
Q9BQ67	GRWD1	Glutamate-rich WD repeat-containing protein 1	1.58197	0.0674181	7.36635e-18	14	74
Q9NXD2	MTMR10	Myotubularin-related protein 10	1.55951	0.0464117	5.19605e-24	14	74
Q92804	TAF15	TATA-binding protein-associated factor 2N	1.54787	0.0330737	3.35174e-23	29	45
Q8IXM6	NRM	Nurim	1.54336	0.0544152	6.18591e-18	19	64
P63167	DYNLL1	Dynein light chain 1, cytoplasmic	1.53857	0.0302139	3.94224e-23	34	36
Q13895	BYSL	Bystin	1.53367	0.057417	1.26507e-14	25	53
Q9NRK6	ABCB10	ATP-binding cassette sub-family B member 10, mitochondrial	1.52736	0.0558488	6.73144e-15	25	53
Q8NHX9	TPCN2	Two pore calcium channel protein 2	1.52474	0.0718373	3.97746e-12	22	58
Q86VV8	RTTN	Rotatin	1.51961	0.0634859	5.54812e-11	33	38
P46087	NOP2	Probable 28S rRNA (cytosine(4447)-C(5))-methyltransferase	1.51324	0.0396255	7.55382e-16	42	21
Q9NQZ2	UTP3	Something about silencing protein 10	1.50826	0.0525811	2.79581e-13	33	38
Q8IV61	RASGRP3	Ras guanyl-releasing protein 3	1.50644	0.0446794	1.81229e-19	21	60
Q9Y399	MRPS2	28S ribosomal protein S2, mitochondrial	1.50023	0.0574042	7.96411e-14	25	53
Q9UKK3	PARP4	Protein mono-ADP-ribosyltransferase PARP4	1.49676	0.0568125	1.65531e-14	23	57
Q9NY12	GAR1	H/ACA ribonucleoprotein complex subunit 1	1.4898	0.0439056	7.21379e-14	41	23
Q6DKI1	RPL7L1	60S ribosomal protein L7-like 1	1.47933	0.0570701	4.04052e-12	30	43
Q07812	BAX	Apoptosis regulator BAX	1.47181	0.0375078	8.03373e-17	36	32
Q658Y4	FAM91A1	Protein FAM91A1	1.46796	0.0344059	1.72773e-22	22	58
Q96GC9	VMP1	Vacuole membrane protein 1	1.46723	0.0467266	3.39282e-15	28	47
Q99735	MGST2	Microsomal glutathione S-transferase 2	1.46496	0.0662367	1.42375e-08	38	28
Q9UKL6	PCTP	Phosphatidylcholine transfer protein	1.46336	0.0335848	2.2922e-22	23	57
P18754	RCC1	Regulator of chromosome condensation	1.44919	0.0576942	2.36364e-09	41	23
O14907	TAX1BP3	Tax1-binding protein 3	1.42571	0.0475278	3.74615e-17	18	66
Q9NX20	MRPL16	39S ribosomal protein L16, mitochondrial	1.4182	0.041656	5.84998e-15	30	43
Q15388	TOMM20	Mitochondrial import receptor subunit TOM20 homolog	1.40875	0.0546302	4.63945e-09	41	23
Q01780	EXOSC10	Exosome component 10	1.40407	0.0336719	7.34977e-18	30	43
P67812	SEC11A	Signal peptidase complex catalytic subunit SEC11A	1.39723	0.0313317	7.87325e-19	30	43
P51809	VAMP7	Vesicle-associated membrane protein 7	1.39467	0.0316275	5.13551e-16	41	23
Q9H3H5	DPAGT1	UDP-N-acetylglucosamine--dolichyl-phosphate N-acetylglucosaminephosphotransferase	1.39228	0.0397682	4.58572e-15	29	45
Q9BPU6	DPYSL5	Dihydropyrimidinase-related protein 5	1.39091	0.0801129	3.83922e-08	21	60
Q8N2K0	ABHD12	Lysophosphatidylserine lipase ABHD12	1.3869	0.0551656	1.20811e-09	33	38
Q9BUN8	DERL1	Derlin-1	1.38318	0.0542912	1.00893e-10	28	47
P04233	CD74	HLA class II histocompatibility antigen gamma chain	1.37757	0.101665	7.85987e-05	28	47
Q9Y606	PUS1	tRNA pseudouridine synthase A	1.36944	0.0336977	1.43546e-15	34	36
P20036	HLA-DPA1	HLA class II histocompatibility antigen, DP alpha 1 chain	1.36614	0.0827897	5.42703e-05	38	28
Q9Y680	FKBP7	Peptidyl-prolyl cis-trans isomerase FKBP7	1.36538	0.0530287	1.79896e-11	24	55
Q9Y2X7	GIT1	ARF GTPase-activating protein GIT1	1.35736	0.0624105	7.47711e-07	39	26
Q15269	PWP2	Periodic tryptophan protein 2 homolog	1.35678	0.0391259	6.3256e-13	34	36
Q9H2K8	TAOK3	Serine/threonine-protein kinase TAO3	1.35667	0.0430406	6.04938e-13	28	47
Q68DK2	ZFYVE26	Zinc finger FYVE domain-containing protein 26	1.35468	0.03764	1.16163e-15	25	53
P62841	RPS15	40S ribosomal protein S15	1.3542	0.0826827	2.20604e-05	32	40
Q8N983	MRPL43	39S ribosomal protein L43, mitochondrial	1.35164	0.0377367	1.13578e-17	19	64
P05161	ISG15	Ubiquitin-like protein ISG15	1.34779	0.0746083	8.75034e-06	34	36
P16152	CBR1	Carbonyl reductase [NADPH] 1	1.34427	0.0388007	8.64544e-10	53	0
Q08170	SRSF4	Serine/arginine-rich splicing factor 4	1.34421	0.0636367	2.87311e-08	26	51
P78527	PRKDC	DNA-dependent protein kinase catalytic subunit	1.34404	0.0284175	7.55239e-14	53	0
P62424	RPL7A	60S ribosomal protein L7a	1.3429	0.0249785	1.02463e-15	53	0
O43776	NARS1	Asparagine--tRNA ligase, cytoplasmic	1.3417	0.0256157	2.76617e-15	53	0
O75531	BANF1	Barrier-to-autointegration factor	1.34112	0.0759665	0.000356954	53	0
P82650	MRPS22	28S ribosomal protein S22, mitochondrial	1.34108	0.0409526	6.96177e-14	25	53
Q14669	TRIP12	E3 ubiquitin-protein ligase TRIP12	1.34056	0.0443742	1.60796e-08	50	6
P56385	ATP5ME	ATP synthase subunit e, mitochondrial	1.33883	0.0481671	2.20918e-07	53	0
Q9HCE1	MOV10	Helicase MOV-10	1.33767	0.0403886	8.46946e-11	40	25
P28066	PSMA5	Proteasome subunit alpha type-5	1.33736	0.028674	1.81528e-13	53	0
Q9Y5J1	UTP18	U3 small nucleolar RNA-associated protein 18 homolog	1.33678	0.025247	1.24858e-19	31	42
Q7Z429	GRINA	Protein lifeguard 1	1.33602	0.149188	8.69432e-06	8	85
Q9Y383	LUC7L2	Putative RNA-binding protein Luc7-like 2	1.33503	0.0297084	6.97636e-13	53	0
P26641	EEF1G	Elongation factor 1-gamma	1.33499	0.0212699	6.35633e-18	53	0
Q8NBJ5	COLGALT1	Procollagen galactosyltransferase 1	1.33455	0.0280158	6.43613e-22	19	64
Q8WYA6	CTNNBL1	Beta-catenin-like protein 1	1.33449	0.0318348	6.18323e-12	53	0
P43307	SSR1	Translocon-associated protein subunit alpha	1.33311	0.0316428	5.77939e-12	53	0
Q9UQ80	PA2G4	Proliferation-associated protein 2G4	1.33207	0.0199151	6.90882e-19	53	0
P31040	SDHA	Succinate dehydrogenase [ubiquinone] flavoprotein subunit, mitochondrial	1.33004	0.033023	2.63855e-11	53	0
P0DPK2	H3Y1	Histone H3.Y	1.329	0.0469687	2.00297e-13	19	64
P51572	BCAP31	B-cell receptor-associated protein 31	1.32884	0.0308636	3.83897e-12	53	0
P23526	AHCY	Adenosylhomocysteinase	1.32807	0.0257585	1.20137e-14	53	0
O60343	TBC1D4	TBC1 domain family member 4	1.32753	0.037053	1.56687e-10	47	11
O43676	NDUFB3	NADH dehydrogenase [ubiquinone] 1 beta subcomplex subunit 3	1.32618	0.0677845	1.03936e-09	16	70
Q5R3I4	TTC38	Tetratricopeptide repeat protein 38	1.32606	0.0416037	4.40253e-13	25	53
Q0VDF9	HSPA14	Heat shock 70 kDa protein 14	1.32489	0.0364333	9.55096e-13	34	36
Q06323	PSME1	Proteasome activator complex subunit 1	1.32474	0.0479353	4.40655e-07	53	0
P23528	CFL1	Cofilin-1	1.32454	0.0219242	5.79415e-17	53	0
P09525	ANXA4	Annexin A4	1.324	0.0366748	8.12739e-10	53	0
Q9Y5X2	SNX8	Sorting nexin-8	1.32325	0.0316224	1.27118e-11	53	0
Q8NBS9	TXNDC5	Thioredoxin domain-containing protein 5	1.32287	0.0351469	2.76599e-10	53	0
O75821	EIF3G	Eukaryotic translation initiation factor 3 subunit G	1.32249	0.0360595	5.77808e-10	53	0
P11142	HSPA8	Heat shock cognate 71 kDa protein	1.3221	0.0215807	4.22016e-17	53	0
Q99623	PHB2	Prohibitin-2	1.32062	0.0302569	4.20244e-12	53	0
P62910	RPL32	60S ribosomal protein L32	1.31987	0.0383284	3.47628e-09	53	0
P07858	CTSB	Cathepsin B	1.31852	0.0564694	1.23278e-05	53	0
Q9H0C8	ILKAP	Integrin-linked kinase-associated serine/threonine phosphatase 2C	1.31792	0.0375392	2.61299e-10	45	15
P57729	RAB38	Ras-related protein Rab-38	1.31725	0.0495144	1.26365e-06	53	0
Q9UNX4	WDR3	WD repeat-containing protein 3	1.315	0.0332097	6.7818e-12	44	17
Q9Y6N5	SQOR	Sulfide:quinone oxidoreductase, mitochondrial	1.31477	0.0490182	6.68875e-07	50	6
Q92643	PIGK	GPI-anchor transamidase	1.31467	0.0366431	1.24735e-10	44	17
Q3SY69	ALDH1L2	Mitochondrial 10-formyltetrahydrofolate dehydrogenase	1.31464	0.047249	5.79865e-07	53	0
Q9NR31	SAR1A	GTP-binding protein SAR1a	1.31427	0.0268324	1.70616e-13	53	0
P28838	LAP3	Cytosol aminopeptidase	1.31375	0.0579277	2.30503e-05	53	0
Q03518	TAP1	Antigen peptide transporter 1	1.31295	0.0650917	0.000130833	53	0
P17643	TYRP1	5,6-dihydroxyindole-2-carboxylic acid oxidase	1.31257	0.0863159	0.00303451	53	0
O60613	SELENOF	Selenoprotein F	1.31102	0.0369051	1.95924e-09	52	2
Q9H6S3	EPS8L2	Epidermal growth factor receptor kinase substrate 8-like protein 2	1.31054	0.0516593	3.92712e-06	53	0
P62826	RAN	GTP-binding nuclear protein Ran	1.31035	0.0288945	2.54927e-12	53	0
Q02818	NUCB1	Nucleobindin-1	1.30935	0.028934	2.91713e-12	53	0
P07237	P4HB	Protein disulfide-isomerase	1.30908	0.0320587	6.21399e-11	53	0
Q9Y3E5	PTRH2	Peptidyl-tRNA hydrolase 2, mitochondrial	1.30792	0.0699622	0.000390378	53	0
Q8IXM3	MRPL41	39S ribosomal protein L41, mitochondrial	1.30786	0.0287148	1.23679e-14	38	28
P32969	RPL9	60S ribosomal protein L9	1.30711	0.0253043	5.03875e-14	53	0
Q15631	TSN	Translin	1.30678	0.0342262	4.73194e-10	53	0
P36959	GMPR	GMP reductase 1	1.30657	0.0508504	3.63374e-06	53	0
P25205	MCM3	DNA replication licensing factor MCM3	1.30592	0.0583338	9.89599e-08	28	47
P28065	PSMB9	Proteasome subunit beta type-9	1.3058	0.0844178	4.50472e-05	26	51
P42226	STAT6	Signal transducer and activator of transcription 6	1.30549	0.0332236	1.01731e-10	50	6
P17900	GM2A	Ganglioside GM2 activator	1.30499	0.0539084	1.08187e-05	53	0
P62263	RPS14	40S ribosomal protein S14	1.30487	0.0345128	6.8847e-10	53	0
P60660	MYL6	Myosin light polypeptide 6	1.30483	0.0293585	6.72228e-12	53	0
Q9NNX6	CD209	CD209 antigen	1.30479	0.12217	8.39761e-06	10	81
O43852	CALU	Calumenin	1.30364	0.0378599	8.2469e-09	53	0
Q9HB19	PLEKHA2	Pleckstrin homology domain-containing family A member 2	1.3031	0.0380873	4.12576e-13	26	51
P62269	RPS18	40S ribosomal protein S18	1.30291	0.0193098	6.02682e-18	53	0
P06280	GLA	Alpha-galactosidase A	1.30245	0.054533	1.55102e-06	41	23
Q9H0U4	RAB1B	Ras-related protein Rab-1B	1.30145	0.0359947	4.04422e-11	39	26
Q9Y5S1	TRPV2	Transient receptor potential cation channel subfamily V member 2	1.30047	0.0514937	6.17426e-10	23	57
P23396	RPS3	40S ribosomal protein S3	1.30046	0.0222336	1.25302e-15	53	0
Q03701	CEBPZ	CCAAT/enhancer-binding protein zeta	1.29936	0.045185	7.54056e-09	36	32
Q53EL6	PDCD4	Programmed cell death protein 4	1.29851	0.0503192	4.59136e-06	53	0
Q9UNX3	RPL26L1	60S ribosomal protein L26-like 1	1.29788	0.0341085	2.40243e-11	41	23
P08236	GUSB	Beta-glucuronidase	1.29762	0.0539552	1.55942e-05	53	0
P62753	RPS6	40S ribosomal protein S6	1.29753	0.0314764	9.93198e-11	53	0
Q9NQ88	TIGAR	Fructose-2,6-bisphosphatase TIGAR	1.29742	0.0537316	2.9843e-06	44	17
P61970	NUTF2	Nuclear transport factor 2	1.29646	0.0422651	1.70539e-07	53	0
Q15056	EIF4H	Eukaryotic translation initiation factor 4H	1.29624	0.0371526	8.96651e-09	53	0
O75390	CS	Citrate synthase, mitochondrial	1.29607	0.0363546	5.31666e-09	53	0
Q14315	FLNC	Filamin-C	1.29597	0.0602335	3.72831e-07	28	47
P63244	RACK1	Receptor of activated protein C kinase 1	1.29587	0.0249458	9.78847e-14	53	0
P52735	VAV2	Guanine nucleotide exchange factor VAV2	1.29471	0.0669366	1.27544e-05	33	38
P60866	RPS20	40S ribosomal protein S20	1.29407	0.0350513	2.43782e-09	53	0
P54819	AK2	Adenylate kinase 2, mitochondrial	1.29406	0.0366402	7.52772e-09	53	0
P43487	RANBP1	Ran-specific GTPase-activating protein	1.29346	0.0406142	5.66154e-09	42	21
O60762	DPM1	Dolichol-phosphate mannosyltransferase subunit 1	1.2932	0.0437954	4.47293e-07	53	0
P48444	ARCN1	Coatomer subunit delta	1.29264	0.0215911	1.07783e-15	53	0
Q9BS26	ERP44	Endoplasmic reticulum resident protein 44	1.29246	0.0282268	6.49147e-12	53	0
P46779	RPL28	60S ribosomal protein L28	1.29183	0.032582	4.25513e-10	53	0
P10721	KIT	Mast/stem cell growth factor receptor Kit	1.29166	0.0583266	1.63371e-05	44	17
Q9BXW7	HDHD5	Haloacid dehalogenase-like hydrolase domain-containing 5	1.29108	0.0426193	3.75035e-08	44	17
Q71DI3	H3C15	Histone H3.2	1.29105	0.121445	5.95708e-07	7	87
Q9H8Y8	GORASP2	Golgi reassembly-stacking protein 2	1.28979	0.029807	4.12052e-11	53	0
P62906	RPL10A	60S ribosomal protein L10a	1.28974	0.0267569	1.66485e-12	53	0
P46199	MTIF2	Translation initiation factor IF-2, mitochondrial	1.28958	0.0287682	6.3131e-12	50	6
Q9Y2Q3	GSTK1	Glutathione S-transferase kappa 1	1.28843	0.0538869	2.39753e-05	53	0
P21796	VDAC1	Voltage-dependent anion-selective channel protein 1	1.28802	0.0282859	1.04276e-11	53	0
Q9UKN8	GTF3C4	General transcription factor 3C polypeptide 4	1.2866	0.0569298	2.51815e-06	36	32
P34896	SHMT1	Serine hydroxymethyltransferase, cytosolic	1.28654	0.044572	9.53951e-07	53	0
P46977	STT3A	Dolichyl-diphosphooligosaccharide--protein glycosyltransferase subunit STT3A	1.28632	0.0316999	3.23117e-10	53	0
P61978	HNRNPK	Heterogeneous nuclear ribonucleoprotein K	1.28623	0.0300261	7.06085e-11	53	0
P0DP23	CALM1	Calmodulin-1	1.28615	0.0921366	0.0094465	53	0
P52788	SMS	Spermine synthase	1.28592	0.0306568	1.31108e-10	53	0
P07711	CTSL	Cathepsin L1	1.28585	0.0993432	0.000114639	19	64
P62847	RPS24	40S ribosomal protein S24	1.28538	0.0468678	1.03811e-06	48	9
Q9C0H2	TTYH3	Protein tweety homolog 3	1.28527	0.121822	9.0467e-07	7	87
Q8NE71	ABCF1	ATP-binding cassette sub-family F member 1	1.28466	0.0470243	2.93095e-06	53	0
P42785	PRCP	Lysosomal Pro-X carboxypeptidase	1.28459	0.0393124	7.82376e-08	53	0
P50995	ANXA11	Annexin A11	1.28431	0.0206012	5.38587e-16	53	0
P07919	UQCRH	Cytochrome b-c1 complex subunit 6, mitochondrial	1.28424	0.0735082	0.000355424	41	23
Q6P587	FAHD1	Acylpyruvase FAHD1, mitochondrial	1.28413	0.0343434	3.22401e-09	53	0
P23588	EIF4B	Eukaryotic translation initiation factor 4B	1.28391	0.0432378	6.17039e-07	53	0
P61586	RHOA	Transforming protein RhoA	1.28237	0.0284034	2.47274e-12	46	13
P07437	TUBB	Tubulin beta chain	1.28234	0.0356553	9.47799e-09	53	0
Q9Y6D9	MAD1L1	Mitotic spindle assembly checkpoint protein MAD1	1.28212	0.0750546	1.61386e-05	25	53
P55008	AIF1	Allograft inflammatory factor 1	1.28204	0.0839283	0.00144688	40	25
P53041	PPP5C	Serine/threonine-protein phosphatase 5	1.28026	0.023764	1.04562e-13	53	0
P06576	ATP5F1B	ATP synthase subunit beta, mitochondrial	1.27981	0.0264347	3.09031e-12	53	0
P07910	HNRNPC	Heterogeneous nuclear ribonucleoproteins C1/C2	1.27969	0.0212444	2.70923e-15	53	0
P40616	ARL1	ADP-ribosylation factor-like protein 1	1.27852	0.0270948	7.28805e-12	53	0
P21912	SDHB	Succinate dehydrogenase [ubiquinone] iron-sulfur subunit, mitochondrial	1.27784	0.0263285	3.32555e-12	53	0
Q8NHP8	PLBD2	Putative phospholipase B-like 2	1.27614	0.0631324	0.00014963	46	13
Q9H9C1	VIPAS39	Spermatogenesis-defective protein 39 homolog	1.27508	0.02934	4.93443e-13	37	30
Q8WUY1	THEM6	Protein THEM6	1.27483	0.0378732	6.93007e-08	53	0
P38646	HSPA9	Stress-70 protein, mitochondrial	1.27408	0.0299346	1.999e-10	53	0
P40121	CAPG	Macrophage-capping protein	1.27397	0.06812	0.000938592	53	0
Q9BZE4	GTPBP4	Nucleolar GTP-binding protein 1	1.27329	0.0271613	1.33427e-11	53	0
Q86V81	ALYREF	THO complex subunit 4	1.27326	0.0454338	3.05933e-06	53	0
Q9Y3B4	SF3B6	Splicing factor 3B subunit 6	1.27226	0.0270217	1.18777e-16	26	51
P04066	FUCA1	Tissue alpha-L-fucosidase	1.27165	0.0725485	0.00191824	53	0
Q13283	G3BP1	Ras GTPase-activating protein-binding protein 1	1.27138	0.0294029	6.88963e-11	50	6
Q9P1F3	ABRACL	Costars family protein ABRACL	1.2712	0.0717332	0.000277733	38	28
Q7L2H7	EIF3M	Eukaryotic translation initiation factor 3 subunit M	1.27088	0.0259443	4.34889e-12	53	0
Q9NVI7	ATAD3A	ATPase family AAA domain-containing protein 3A	1.27033	0.020333	1.83446e-15	53	0
Q9GZS3	WDR61	WD repeat-containing protein 61	1.27018	0.0266007	9.7894e-12	53	0
Q9NRV9	HEBP1	Heme-binding protein 1	1.26906	0.0513476	2.99087e-05	53	0
Q9ULZ3	PYCARD	Apoptosis-associated speck-like protein containing a CARD	1.26886	0.0621943	0.000285566	50	6
Q99729	HNRNPAB	Heterogeneous nuclear ribonucleoprotein A/B	1.26836	0.0513315	3.08668e-05	53	0
Q9Y6K5	OAS3	2~-5~-oligoadenylate synthase 3	1.26831	0.0613802	6.54154e-05	41	23
P62249	RPS16	40S ribosomal protein S16	1.26649	0.0198765	1.34658e-15	53	0
P54709	ATP1B3	Sodium/potassium-transporting ATPase subunit beta-3	1.26584	0.0324201	3.49758e-09	53	0
Q9H1E3	NUCKS1	Nuclear ubiquitous casein and cyclin-dependent kinase substrate 1	1.26509	0.0658789	4.62255e-06	25	53
O00571	DDX3X	ATP-dependent RNA helicase DDX3X	1.26409	0.0190777	4.43899e-16	53	0
P39656	DDOST	Dolichyl-diphosphooligosaccharide--protein glycosyltransferase 48 kDa subunit	1.26407	0.0246635	1.94737e-12	53	0
Q13084	MRPL28	39S ribosomal protein L28, mitochondrial	1.26403	0.0424517	1.5552e-06	53	0
P10515	DLAT	Dihydrolipoyllysine-residue acetyltransferase component of pyruvate dehydrogenase complex, mitochondrial	1.26307	0.0280298	9.17594e-11	53	0
P19525	EIF2AK2	Interferon-induced, double-stranded RNA-activated protein kinase	1.2624	0.0380293	7.58197e-09	40	25
P27635	RPL10	60S ribosomal protein L10	1.26213	0.0376256	1.53178e-07	53	0
Q9Y485	DMXL1	DmX-like protein 1	1.2618	0.0351667	1.09142e-08	48	9
P40967	PMEL	Melanocyte protein PMEL	1.26143	0.0752595	0.00367064	53	0
Q86UX7	FERMT3	Fermitin family homolog 3	1.26121	0.0396445	4.92546e-07	53	0
P61247	RPS3A	40S ribosomal protein S3a	1.26053	0.0275656	7.36442e-11	53	0
O14979	HNRNPDL	Heterogeneous nuclear ribonucleoprotein D-like	1.2603	0.0518284	5.41514e-05	53	0
Q9HD33	MRPL47	39S ribosomal protein L47, mitochondrial	1.25987	0.0363146	2.98034e-09	40	25
P11586	MTHFD1	C-1-tetrahydrofolate synthase, cytoplasmic	1.25964	0.0200237	4.0918e-15	53	0
Q8NDH3	NPEPL1	Probable aminopeptidase NPEPL1	1.25959	0.0357531	6.10286e-08	53	0
Q9H2I8	LRMDA	Leucine-rich melanocyte differentiation-associated protein	1.25953	0.0624562	1.11179e-08	15	72
Q92922	SMARCC1	SWI/SNF complex subunit SMARCC1	1.25949	0.0640296	4.74494e-07	20	62
Q92542	NCSTN	Nicastrin	1.25939	0.0361818	8.06946e-08	53	0
Q9Y3A6	TMED5	Transmembrane emp24 domain-containing protein 5	1.25919	0.0372998	8.41618e-08	50	6
O95819	MAP4K4	Mitogen-activated protein kinase kinase kinase kinase 4	1.2591	0.0299161	2.17004e-12	35	34
E9PAV3	NACA	Nascent polypeptide-associated complex subunit alpha, muscle-specific form	1.25899	0.0300459	9.12028e-10	53	0
Q96FW1	OTUB1	Ubiquitin thioesterase OTUB1	1.25846	0.0339472	2.04363e-08	53	0
P23919	DTYMK	Thymidylate kinase	1.25633	0.0292663	2.66246e-10	50	6
P53999	SUB1	Activated RNA polymerase II transcriptional coactivator p15	1.25614	0.0414839	1.68995e-06	53	0
P08238	HSP90AB1	Heat shock protein HSP 90-beta	1.2561	0.0266801	4.58172e-11	53	0
P13010	XRCC5	X-ray repair cross-complementing protein 5	1.25583	0.0206395	1.79702e-14	53	0
P05107	ITGB2	Integrin beta-2	1.25575	0.0726719	0.00117987	43	19
Q9UBV8	PEF1	Peflin	1.2551	0.0315879	4.7476e-09	53	0
P84090	ERH	Enhancer of rudimentary homolog	1.25507	0.0514201	2.58392e-08	23	57
P32321	DCTD	Deoxycytidylate deaminase	1.25429	0.0368027	4.6595e-08	47	11
P12081	HARS1	Histidine--tRNA ligase, cytoplasmic	1.25318	0.0311218	3.87679e-09	53	0
Q969Q0	RPL36AL	60S ribosomal protein L36a-like	1.25249	0.0520139	9.70097e-06	40	25
P63104	YWHAZ	14-3-3 protein zeta/delta	1.25213	0.0440037	6.33608e-06	53	0
P55795	HNRNPH2	Heterogeneous nuclear ribonucleoprotein H2	1.25205	0.0286732	5.15663e-10	53	0
P43304	GPD2	Glycerol-3-phosphate dehydrogenase, mitochondrial	1.25176	0.0232511	1.27892e-12	53	0
P31942	HNRNPH3	Heterogeneous nuclear ribonucleoprotein H3	1.25152	0.0186307	1.02463e-15	53	0
Q15397	PUM3	Pumilio homolog 3	1.25128	0.0514689	7.70681e-05	53	0
O94832	MYO1D	Unconventional myosin-Id	1.25083	0.0434405	5.47967e-06	53	0
P20674	COX5A	Cytochrome c oxidase subunit 5A, mitochondrial	1.25076	0.048485	2.09366e-05	50	6
O75165	DNAJC13	DnaJ homolog subfamily C member 13	1.25036	0.0361338	1.58965e-07	53	0
Q14152	EIF3A	Eukaryotic translation initiation factor 3 subunit A	1.25011	0.0171595	7.21965e-17	53	0
Q9H3G5	CPVL	Probable serine carboxypeptidase CPVL	1.24983	0.0567795	0.000300833	53	0
Q9GZT3	SLIRP	SRA stem-loop-interacting RNA-binding protein, mitochondrial	1.24978	0.0718608	0.000582799	37	30
P11021	HSPA5	Endoplasmic reticulum chaperone BiP	1.24913	0.0205599	3.64569e-14	53	0
Q08752	PPID	Peptidyl-prolyl cis-trans isomerase D	1.24898	0.0280087	2.70293e-14	28	47
P62820	RAB1A	Ras-related protein Rab-1A	1.2487	0.0236203	2.93304e-12	53	0
P31146	CORO1A	Coronin-1A	1.24863	0.0681633	0.00225584	53	0
A6NHQ2	FBLL1	rRNA/tRNA 2~-O-methyltransferase fibrillarin-like protein 1	1.24823	0.034874	4.59341e-08	50	6
Q96RT1	ERBIN	Erbin	1.24705	0.029008	1.14602e-09	53	0
Q01130	SRSF2	Serine/arginine-rich splicing factor 2	1.24689	0.0382227	1.20433e-07	45	15
Q99536	VAT1	Synaptic vesicle membrane protein VAT-1 homolog	1.24572	0.0295291	2.06249e-09	53	0
Q9UMX5	NENF	Neudesin	1.24566	0.0477396	2.12683e-06	38	28
P15880	RPS2	40S ribosomal protein S2	1.24503	0.0353338	1.50155e-07	53	0
O15173	PGRMC2	Membrane-associated progesterone receptor component 2	1.24495	0.0397695	1.64808e-06	53	0
Q05397	PTK2	Focal adhesion kinase 1	1.24483	0.0484283	4.59659e-06	40	25
P04075	ALDOA	Fructose-bisphosphate aldolase A	1.24449	0.0251234	2.87144e-11	53	0
Q96EC8	YIPF6	Protein YIPF6	1.24427	0.0569155	2.05983e-08	17	68
P60953	CDC42	Cell division control protein 42 homolog	1.24296	0.0313103	1.15305e-08	53	0
P62491	RAB11A	Ras-related protein Rab-11A	1.2424	0.0420714	2.69321e-06	49	8
Q9P0U1	TOMM7	Mitochondrial import receptor subunit TOM7 homolog	1.24201	0.0829465	0.00368256	38	28
P07900	HSP90AA1	Heat shock protein HSP 90-alpha	1.24198	0.0220092	7.62348e-13	53	0
P23284	PPIB	Peptidyl-prolyl cis-trans isomerase B	1.24134	0.0309087	9.82313e-09	53	0
P42858	HTT	Huntingtin	1.24125	0.0280759	8.73941e-10	53	0
Q9UH62	ARMCX3	Armadillo repeat-containing X-linked protein 3	1.24113	0.0443429	2.87357e-06	44	17
Q13310	PABPC4	Polyadenylate-binding protein 4	1.24081	0.0349957	5.9185e-10	33	38
Q96PK6	RBM14	RNA-binding protein 14	1.24025	0.0231573	4.32454e-12	53	0
P12956	XRCC6	X-ray repair cross-complementing protein 6	1.24016	0.0238352	1.01087e-11	53	0
Q14444	CAPRIN1	Caprin-1	1.23871	0.0335258	8.11072e-08	53	0
Q6PCB7	SLC27A1	Long-chain fatty acid transport protein 1	1.23818	0.0300772	6.86836e-09	53	0
P82675	MRPS5	28S ribosomal protein S5, mitochondrial	1.23803	0.0278992	6.77592e-12	37	30
O00160	MYO1F	Unconventional myosin-If	1.23725	0.0576703	0.000206123	44	17
P35637	FUS	RNA-binding protein FUS	1.23685	0.0558512	1.00561e-05	31	42
Q8N201	INTS1	Integrator complex subunit 1	1.23649	0.0401293	3.84934e-08	34	36
P52272	HNRNPM	Heterogeneous nuclear ribonucleoprotein M	1.23569	0.0245486	4.00393e-11	53	0
Q9Y305	ACOT9	Acyl-coenzyme A thioesterase 9, mitochondrial	1.23422	0.0370043	9.12583e-07	53	0
P22570	FDXR	NADPH:adrenodoxin oxidoreductase, mitochondrial	1.23369	0.0313453	2.80812e-08	53	0
Q8TAQ2	SMARCC2	SWI/SNF complex subunit SMARCC2	1.23335	0.0356765	4.74564e-07	53	0
Q96DG6	CMBL	Carboxymethylenebutenolidase homolog	1.23246	0.0501276	3.81394e-05	44	17
Q14697	GANAB	Neutral alpha-glucosidase AB	1.23207	0.0239823	3.13786e-11	53	0
Q9Y2B0	CNPY2	Protein canopy homolog 2	1.23196	0.0356791	5.30462e-07	53	0
Q13151	HNRNPA0	Heterogeneous nuclear ribonucleoprotein A0	1.23179	0.0452598	3.46252e-05	53	0
Q7Z3B4	NUP54	Nucleoporin p54	1.23162	0.0377659	4.12086e-07	46	13
Q9UBS8	RNF14	E3 ubiquitin-protein ligase RNF14	1.23152	0.0410866	1.37487e-07	35	34
Q15286	RAB35	Ras-related protein Rab-35	1.23147	0.0256932	2.31098e-10	53	0
O95816	BAG2	BAG family molecular chaperone regulator 2	1.23114	0.0491635	2.13417e-05	42	21
P08708	RPS17	40S ribosomal protein S17	1.23107	0.0354993	5.15738e-07	53	0
Q9BTC0	DIDO1	Death-inducer obliterator 1	1.23084	0.0769059	1.23759e-05	16	70
P49590	HARS2	Histidine--tRNA ligase, mitochondrial	1.23079	0.03961	1.6874e-06	48	9
Q6PI48	DARS2	Aspartate--tRNA ligase, mitochondrial	1.23062	0.0378778	1.87361e-06	53	0
Q8WU90	ZC3H15	Zinc finger CCCH domain-containing protein 15	1.22983	0.0226039	5.42192e-16	29	45
Q9NQ50	MRPL40	39S ribosomal protein L40, mitochondrial	1.22945	0.0289771	3.13171e-09	50	6
Q9BRJ2	MRPL45	39S ribosomal protein L45, mitochondrial	1.2292	0.0360734	5.55151e-08	41	23
P25398	RPS12	40S ribosomal protein S12	1.22908	0.052546	0.000305911	53	0
P41252	IARS1	Isoleucine--tRNA ligase, cytoplasmic	1.22894	0.0170492	1.205e-15	53	0
Q8TDN6	BRIX1	Ribosome biogenesis protein BRX1 homolog	1.22815	0.0748249	0.00539355	46	13
Q9Y673	ALG5	Dolichyl-phosphate beta-glucosyltransferase	1.22784	0.0495248	7.84287e-05	48	9
P16070	CD44	CD44 antigen	1.22776	0.0393595	4.58936e-06	53	0
P06737	PYGL	Glycogen phosphorylase, liver form	1.2277	0.0760903	0.0104116	53	0
P25705	ATP5F1A	ATP synthase subunit alpha, mitochondrial	1.22763	0.0307367	3.13707e-08	53	0
Q06136	KDSR	3-ketodihydrosphingosine reductase	1.2276	0.0398004	1.03152e-06	44	17
A1L0T0	ILVBL	2-hydroxyacyl-CoA lyase 2	1.22734	0.0288885	7.44254e-09	53	0
Q96I24	FUBP3	Far upstream element-binding protein 3	1.22632	0.040439	4.77262e-07	39	26
P10253	GAA	Lysosomal alpha-glucosidase	1.22601	0.0412643	1.15456e-05	53	0
P55084	HADHB	Trifunctional enzyme subunit beta, mitochondrial	1.22599	0.02501	2.05547e-10	53	0
O75608	LYPLA1	Acyl-protein thioesterase 1	1.22593	0.039352	5.21148e-06	53	0
P42224	STAT1	Signal transducer and activator of transcription 1-alpha/beta	1.22573	0.0722587	0.00761988	53	0
Q5QNW6	H2BC18	Histone H2B type 2-F	1.22566	0.0601467	1.82838e-08	13	75
P04080	CSTB	Cystatin-B	1.22566	0.0354461	7.71242e-07	53	0
P30101	PDIA3	Protein disulfide-isomerase A3	1.22541	0.0308633	4.24089e-08	53	0
P28070	PSMB4	Proteasome subunit beta type-4	1.22405	0.0357328	1.02834e-06	53	0
Q15833	STXBP2	Syntaxin-binding protein 2	1.22393	0.0301758	2.92732e-08	53	0
Q9P0J1	PDP1	[Pyruvate dehydrogenase [acetyl-transferring]]-phosphatase 1, mitochondrial	1.2237	0.0312306	6.47953e-08	53	0
P13797	PLS3	Plastin-3	1.22317	0.0344011	5.24894e-07	53	0
O75083	WDR1	WD repeat-containing protein 1	1.22305	0.0241171	1.06708e-10	53	0
Q9Y5B9	SUPT16H	FACT complex subunit SPT16	1.22305	0.0219735	7.49202e-12	53	0
P13674	P4HA1	Prolyl 4-hydroxylase subunit alpha-1	1.22301	0.04475	4.97745e-05	53	0
P23497	SP100	Nuclear autoantigen Sp-100	1.22251	0.0420878	6.52441e-07	36	32
Q9BQG0	MYBBP1A	Myb-binding protein 1A	1.22203	0.0366399	1.94386e-06	53	0
P25098	GRK2	Beta-adrenergic receptor kinase 1	1.22114	0.0669955	6.43391e-06	18	66
P50395	GDI2	Rab GDP dissociation inhibitor beta	1.22095	0.0280904	7.24337e-09	53	0
P84098	RPL19	60S ribosomal protein L19	1.22093	0.0438851	4.24248e-05	53	0
Q00535	CDK5	Cyclin-dependent-like kinase 5	1.22007	0.0581837	8.68262e-07	19	64
P13807	GYS1	Glycogen [starch] synthase, muscle	1.21999	0.0377358	3.85258e-06	53	0
O15371	EIF3D	Eukaryotic translation initiation factor 3 subunit D	1.21988	0.0204565	1.38803e-12	53	0
O75962	TRIO	Triple functional domain protein	1.21957	0.0455998	6.70955e-07	30	43
Q9Y2Q9	MRPS28	28S ribosomal protein S28, mitochondrial	1.21954	0.0381743	3.4127e-07	40	25
O60486	PLXNC1	Plexin-C1	1.21824	0.0398858	1.12497e-05	53	0
P43490	NAMPT	Nicotinamide phosphoribosyltransferase	1.21766	0.0349535	1.12911e-06	53	0
Q07666	KHDRBS1	KH domain-containing, RNA-binding, signal transduction-associated protein 1	1.2174	0.0418978	2.61469e-05	53	0
Q7LG56	RRM2B	Ribonucleoside-diphosphate reductase subunit M2 B	1.21735	0.049702	0.000279586	53	0
Q8N3C0	ASCC3	Activating signal cointegrator 1 complex subunit 3	1.217	0.0322104	1.24809e-07	50	6
P27708	CAD	CAD protein	1.21682	0.0208737	3.79094e-12	53	0
Q92552	MRPS27	28S ribosomal protein S27, mitochondrial	1.21677	0.02574	1.26329e-09	53	0
O75489	NDUFS3	NADH dehydrogenase [ubiquinone] iron-sulfur protein 3, mitochondrial	1.21653	0.0318885	1.95984e-07	53	0
Q1KMD3	HNRNPUL2	Heterogeneous nuclear ribonucleoprotein U-like protein 2	1.21644	0.0309286	1.02967e-07	53	0
P51580	TPMT	Thiopurine S-methyltransferase	1.21609	0.0478202	5.15109e-05	44	17
Q12929	EPS8	Epidermal growth factor receptor kinase substrate 8	1.21575	0.0468713	0.00014434	53	0
Q9ULC4	MCTS1	Malignant T-cell-amplified sequence 1	1.21559	0.0293025	3.37973e-08	53	0
P09012	SNRPA	U1 small nuclear ribonucleoprotein A	1.21495	0.0363455	2.89844e-06	53	0
P55899	FCGRT	IgG receptor FcRn large subunit p51	1.21449	0.040004	9.78058e-08	31	42
Q49A26	GLYR1	Putative oxidoreductase GLYR1	1.21384	0.0227895	9.0864e-12	46	13
P55884	EIF3B	Eukaryotic translation initiation factor 3 subunit B	1.21362	0.0179085	5.59711e-14	53	0
P49720	PSMB3	Proteasome subunit beta type-3	1.21322	0.0232879	1.34315e-10	53	0
Q5JRX3	PITRM1	Presequence protease, mitochondrial	1.2132	0.03674	4.01665e-06	53	0
Q9BU23	LMF2	Lipase maturation factor 2	1.21266	0.0351591	1.90573e-06	53	0
Q13409	DYNC1I2	Cytoplasmic dynein 1 intermediate chain 2	1.2122	0.0379205	2.1537e-06	46	13
O43237	DYNC1LI2	Cytoplasmic dynein 1 light intermediate chain 2	1.21173	0.0393974	1.44701e-05	53	0
Q96PH1	NOX5	NADPH oxidase 5	1.21131	0.11811	0.00407884	15	72
Q9Y3F4	STRAP	Serine-threonine kinase receptor-associated protein	1.21131	0.020471	4.46457e-12	53	0
P61421	ATP6V0D1	V-type proton ATPase subunit d 1	1.21122	0.0295897	6.48131e-08	53	0
P49773	HINT1	Histidine triad nucleotide-binding protein 1	1.21106	0.0461979	0.000155942	53	0
Q9UHD8	SEPTIN9	Septin-9	1.21077	0.0246587	8.38829e-10	53	0
O75694	NUP155	Nuclear pore complex protein Nup155	1.21073	0.0194899	1.14178e-12	53	0
P22102	GART	Trifunctional purine biosynthetic protein adenosine-3	1.21069	0.0259624	3.1491e-09	53	0
P61026	RAB10	Ras-related protein Rab-10	1.21055	0.0394884	1.48017e-08	26	51
P04843	RPN1	Dolichyl-diphosphooligosaccharide--protein glycosyltransferase subunit 1	1.21043	0.0184869	2.39213e-13	53	0
Q9Y5M8	SRPRB	Signal recognition particle receptor subunit beta	1.21006	0.0298885	9.00793e-08	53	0
Q8TC07	TBC1D15	TBC1 domain family member 15	1.20834	0.0368138	6.06929e-06	53	0
Q8TCS8	PNPT1	Polyribonucleotide nucleotidyltransferase 1, mitochondrial	1.20823	0.0381321	1.10285e-05	53	0
Q6IAN0	DHRS7B	Dehydrogenase/reductase SDR family member 7B	1.20802	0.0453393	0.0001453	53	0
Q32MZ4	LRRFIP1	Leucine-rich repeat flightless-interacting protein 1	1.20791	0.0389843	2.27252e-08	27	49
Q8N257	H2BU1	Histone H2B type 3-B	1.20746	0.0740725	7.70601e-05	18	66
Q14166	TTLL12	Tubulin--tyrosine ligase-like protein 12	1.20727	0.0308166	2.26889e-07	53	0
P26196	DDX6	Probable ATP-dependent RNA helicase DDX6	1.20722	0.0476163	0.000283812	53	0
Q9Y316	MEMO1	Protein MEMO1	1.20637	0.0467576	9.4051e-06	34	36
Q8NCN5	PDPR	Pyruvate dehydrogenase phosphatase regulatory subunit, mitochondrial	1.20628	0.0325022	4.11716e-07	50	6
P25788	PSMA3	Proteasome subunit alpha type-3	1.20617	0.02446	1.17344e-09	53	0
P30533	LRPAP1	Alpha-2-macroglobulin receptor-associated protein	1.20583	0.0382438	1.37508e-05	53	0
P08195	SLC3A2	4F2 cell-surface antigen heavy chain	1.20552	0.0325768	8.19019e-07	53	0
P25786	PSMA1	Proteasome subunit alpha type-1	1.20508	0.0245366	1.44876e-09	53	0
Q14320	FAM50A	Protein FAM50A	1.20504	0.0550919	7.58197e-09	12	77
Q8IYM9	TRIM22	E3 ubiquitin-protein ligase TRIM22	1.20465	0.0500868	4.66344e-07	21	60
P53597	SUCLG1	Succinate--CoA ligase [ADP/GDP-forming] subunit alpha, mitochondrial	1.20464	0.0323461	7.70865e-07	53	0
O00443	PIK3C2A	Phosphatidylinositol 4-phosphate 3-kinase C2 domain-containing subunit alpha	1.20436	0.046298	1.19696e-06	27	49
O15372	EIF3H	Eukaryotic translation initiation factor 3 subunit H	1.20413	0.0252352	3.3031e-09	53	0
P49755	TMED10	Transmembrane emp24 domain-containing protein 10	1.20412	0.0267482	1.35062e-08	53	0
P48047	ATP5PO	ATP synthase subunit O, mitochondrial	1.20333	0.0418839	6.54412e-05	53	0
P56182	RRP1	Ribosomal RNA processing protein 1 homolog A	1.20299	0.0502419	1.16558e-07	18	66
O95470	SGPL1	Sphingosine-1-phosphate lyase 1	1.20257	0.0342969	2.12285e-08	33	38
Q9NPJ3	ACOT13	Acyl-coenzyme A thioesterase 13	1.20241	0.0399207	2.98287e-07	31	42
O00299	CLIC1	Chloride intracellular channel protein 1	1.20241	0.0429327	9.82911e-05	53	0
P55072	VCP	Transitional endoplasmic reticulum ATPase	1.20171	0.0236631	8.64544e-10	53	0
Q9NRL3	STRN4	Striatin-4	1.20164	0.118746	0.000110641	7	87
Q9UMS4	PRPF19	Pre-mRNA-processing factor 19	1.20161	0.027461	3.28793e-08	53	0
Q96C90	PPP1R14B	Protein phosphatase 1 regulatory subunit 14B	1.2015	0.0478822	0.000199119	47	11
O95602	POLR1A	DNA-directed RNA polymerase I subunit RPA1	1.20082	0.0728711	3.88598e-06	12	77
P16930	FAH	Fumarylacetoacetase	1.20074	0.0373094	1.34505e-05	53	0
P48556	PSMD8	26S proteasome non-ATPase regulatory subunit 8	1.20013	0.0248829	3.73218e-09	53	0
Q12768	WASHC5	WASH complex subunit 5	1.20009	0.0342229	3.2789e-06	53	0
Q8NFV4	ABHD11	Protein ABHD11	1.19981	0.0494351	2.01696e-07	19	64
Q9H9J2	MRPL44	39S ribosomal protein L44, mitochondrial	1.19965	0.0277752	5.23866e-08	53	0
Q15061	WDR43	WD repeat-containing protein 43	1.19962	0.0374621	9.7744e-06	50	6
A0FGR8	ESYT2	Extended synaptotagmin-2	1.19959	0.0314618	7.11711e-07	53	0
Q9NQ29	LUC7L	Putative RNA-binding protein Luc7-like 1	1.19954	0.0380916	1.04462e-07	30	43
Q9NTZ6	RBM12	RNA-binding protein 12	1.1993	0.020848	1.721e-11	50	6
P00338	LDHA	L-lactate dehydrogenase A chain	1.19929	0.0512112	0.000983239	53	0
O00338	SULT1C2	Sulfotransferase 1C2	1.19867	0.0749367	0.000106333	17	68
Q96I99	SUCLG2	Succinate--CoA ligase [GDP-forming] subunit beta, mitochondrial	1.19812	0.0259709	1.3211e-08	53	0
P49354	FNTA	Protein farnesyltransferase/geranylgeranyltransferase type-1 subunit alpha	1.19808	0.0340345	3.51396e-06	53	0
Q13347	EIF3I	Eukaryotic translation initiation factor 3 subunit I	1.19674	0.0303905	4.70907e-07	53	0
Q9Y4I1	MYO5A	Unconventional myosin-Va	1.19659	0.0361474	1.10881e-05	53	0
O43464	HTRA2	Serine protease HTRA2, mitochondrial	1.19634	0.0225523	4.90944e-10	53	0
P18440	NAT1	Arylamine N-acetyltransferase 1	1.19625	0.0432592	4.85453e-08	21	60
Q9ULH1	ASAP1	Arf-GAP with SH3 domain, ANK repeat and PH domain-containing protein 1	1.19597	0.0418969	3.2849e-05	45	15
Q9NYK5	MRPL39	39S ribosomal protein L39, mitochondrial	1.19565	0.0430575	0.000105831	50	6
O00193	SMAP	Small acidic protein	1.19526	0.0606361	0.00224767	43	19
O95834	EML2	Echinoderm microtubule-associated protein-like 2	1.19444	0.0297648	3.88056e-07	53	0
Q9Y303	AMDHD2	N-acetylglucosamine-6-phosphate deacetylase	1.1943	0.0331636	3.06285e-06	53	0
Q00688	FKBP3	Peptidyl-prolyl cis-trans isomerase FKBP3	1.19428	0.0366008	1.3886e-05	52	2
Q9Y2S7	POLDIP2	Polymerase delta-interacting protein 2	1.19408	0.0311846	1.00167e-06	53	0
P38159	RBMX	RNA-binding motif protein, X chromosome	1.19382	0.0333052	3.44345e-06	53	0
Q7Z7H5	TMED4	Transmembrane emp24 domain-containing protein 4	1.19369	0.0331619	8.68262e-07	46	13
Q9UPZ3	HPS5	Hermansky-Pudlak syndrome 5 protein	1.19367	0.059153	1.30101e-07	12	77
O14561	NDUFAB1	Acyl carrier protein, mitochondrial	1.19309	0.0667743	0.0120088	53	0
P26640	VARS1	Valine--tRNA ligase	1.19305	0.0221319	4.62992e-10	53	0
Q9H9Q2	COPS7B	COP9 signalosome complex subunit 7b	1.19274	0.0365136	3.02638e-06	43	19
P45954	ACADSB	Short/branched chain specific acyl-CoA dehydrogenase, mitochondrial	1.19227	0.0448009	0.000220291	50	6
P50454	SERPINH1	Serpin H1	1.1919	0.0232134	1.82504e-09	53	0
Q00325	SLC25A3	Phosphate carrier protein, mitochondrial	1.19153	0.0266538	5.08096e-08	53	0
Q12906	ILF3	Interleukin enhancer-binding factor 3	1.19067	0.0209924	1.55269e-10	53	0
P18858	LIG1	DNA ligase 1	1.19041	0.0280499	1.39011e-09	35	34
Q9Y3B7	MRPL11	39S ribosomal protein L11, mitochondrial	1.19023	0.0365155	1.97655e-06	40	25
P08134	RHOC	Rho-related GTP-binding protein RhoC	1.19018	0.049453	0.000153155	38	28
Q9H3N1	TMX1	Thioredoxin-related transmembrane protein 1	1.19011	0.0374389	1.03729e-05	46	13
Q5JTH9	RRP12	RRP12-like protein	1.19009	0.0276342	1.28907e-07	53	0
Q9P0V9	SEPTIN10	Septin-10	1.18994	0.0305814	1.02056e-06	53	0
Q01518	CAP1	Adenylyl cyclase-associated protein 1	1.18991	0.0319088	2.26128e-06	53	0
P53582	METAP1	Methionine aminopeptidase 1	1.18892	0.0302449	2.75487e-07	47	11
Q8NC51	SERBP1	Plasminogen activator inhibitor 1 RNA-binding protein	1.18856	0.054148	0.00279592	53	0
P34897	SHMT2	Serine hydroxymethyltransferase, mitochondrial	1.18847	0.0317293	2.32906e-06	53	0
Q8IY81	FTSJ3	pre-rRNA 2~-O-ribose RNA methyltransferase FTSJ3	1.18781	0.0340743	8.52939e-06	53	0
P55809	OXCT1	Succinyl-CoA:3-ketoacid coenzyme A transferase 1, mitochondrial	1.18775	0.0470079	0.000708628	53	0
Q9UHX1	PUF60	Poly(U)-binding-splicing factor PUF60	1.18754	0.0309445	1.60262e-06	53	0
Q99829	CPNE1	Copine-1	1.18736	0.0350383	1.38971e-05	53	0
O14579	COPE	Coatomer subunit epsilon	1.18721	0.0252991	2.58118e-08	53	0
Q05519	SRSF11	Serine/arginine-rich splicing factor 11	1.18702	0.0610867	1.10034e-06	13	75
O75323	NIPSNAP2	Protein NipSnap homolog 2	1.18551	0.0314007	8.23163e-07	47	11
O95202	LETM1	Mitochondrial proton/calcium exchanger protein	1.18525	0.0422306	0.000234055	53	0
Q96IJ6	GMPPA	Mannose-1-phosphate guanyltransferase alpha	1.18449	0.0475603	2.50658e-07	18	66
Q8WWC4	MAIP1	m-AAA protease-interacting protein 1, mitochondrial	1.18338	0.0382279	3.63816e-08	23	57
Q93091	RNASE6	Ribonuclease K6	1.1832	0.104096	0.0070227	17	68
Q12965	MYO1E	Unconventional myosin-Ie	1.18317	0.0347922	6.58059e-06	47	11
P67809	YBX1	Y-box-binding protein 1	1.18277	0.0523098	7.288e-08	13	75
O43169	CYB5B	Cytochrome b5 type B	1.18184	0.0436923	0.000210286	47	11
P35270	SPR	Sepiapterin reductase	1.18133	0.029703	1.36319e-06	53	0
O14841	OPLAH	5-oxoprolinase	1.181	0.0400751	0.000158133	53	0
P30084	ECHS1	Enoyl-CoA hydratase, mitochondrial	1.18072	0.04817	0.00133732	53	0
Q765P7	MTSS2	Protein MTSS 2	1.18072	0.0333983	1.11518e-05	53	0
P09661	SNRPA1	U2 small nuclear ribonucleoprotein A~	1.18037	0.0412936	0.000110782	47	11
Q3ZCQ8	TIMM50	Mitochondrial import inner membrane translocase subunit TIM50	1.18029	0.0314252	4.14372e-06	53	0
Q9UK45	LSM7	U6 snRNA-associated Sm-like protein LSm7	1.18001	0.0322093	7.91299e-07	42	21
Q9BXP2	SLC12A9	Solute carrier family 12 member 9	1.17979	0.0348477	2.36536e-05	53	0
Q9NVP1	DDX18	ATP-dependent RNA helicase DDX18	1.17976	0.0320124	6.00405e-06	53	0
Q13523	PRPF4B	Serine/threonine-protein kinase PRP4 homolog	1.17916	0.0364391	1.38563e-05	45	15
Q9UGP8	SEC63	Translocation protein SEC63 homolog	1.17913	0.034058	1.73966e-05	53	0
P62888	RPL30	60S ribosomal protein L30	1.17894	0.0259829	1.19861e-07	53	0
Q8TB24	RIN3	Ras and Rab interactor 3	1.17889	0.0954212	2.36033e-05	7	87
Q96EQ0	SGTB	Small glutamine-rich tetratricopeptide repeat-containing protein beta	1.17887	0.0680529	5.81172e-07	9	83
Q10713	PMPCA	Mitochondrial-processing peptidase subunit alpha	1.17849	0.0404069	0.000142945	50	6
P47914	RPL29	60S ribosomal protein L29	1.17845	0.0610251	3.6024e-05	18	66
Q5VW32	BROX	BRO1 domain-containing protein BROX	1.17811	0.0312193	4.52198e-06	53	0
P17844	DDX5	Probable ATP-dependent RNA helicase DDX5	1.17732	0.0300907	2.54662e-06	53	0
P39023	RPL3	60S ribosomal protein L3	1.1773	0.0254699	9.50964e-08	53	0
P49754	VPS41	Vacuolar protein sorting-associated protein 41 homolog	1.17718	0.0486302	3.50047e-06	21	60
Q8N2G8	GHDC	GH3 domain-containing protein	1.17696	0.0292184	8.90933e-07	50	6
Q6P1X6	C8orf82	UPF0598 protein C8orf82	1.17665	0.052449	0.000314989	33	38
P60900	PSMA6	Proteasome subunit alpha type-6	1.17653	0.0243014	3.75035e-08	53	0
O43847	NRDC	Nardilysin	1.17639	0.0385128	2.01433e-05	41	23
P30519	HMOX2	Heme oxygenase 2	1.17571	0.0424049	6.17962e-05	39	26
Q2M389	WASHC4	WASH complex subunit 4	1.17522	0.0315139	6.94426e-06	53	0
Q92688	ANP32B	Acidic leucine-rich nuclear phosphoprotein 32 family member B	1.1752	0.0529915	0.00419121	53	0
P55854	SUMO3	Small ubiquitin-related modifier 3	1.17496	0.0669639	4.70773e-08	7	87
O00764	PDXK	Pyridoxal kinase	1.17493	0.0332382	1.68895e-05	53	0
P26038	MSN	Moesin	1.17479	0.0261493	2.21288e-07	53	0
Q9Y2G3	ATP11B	Probable phospholipid-transporting ATPase IF	1.17476	0.082275	0.00224767	19	64
P28068	HLA-DMB	HLA class II histocompatibility antigen, DM beta chain	1.17423	0.0956165	3.57808e-05	7	87
O60814	H2BC12	Histone H2B type 1-K	1.17386	0.0851021	5.73152e-06	7	87
Q86UE8	TLK2	Serine/threonine-protein kinase tousled-like 2	1.17325	0.0513187	3.15188e-07	14	74
Q9NUQ9	CYRIB	CYFIP-related Rac1 interactor B	1.1732	0.04088	0.00033931	53	0
Q9Y4F1	FARP1	FERM, ARHGEF and pleckstrin domain-containing protein 1	1.173	0.0357199	5.89135e-05	53	0
Q9NY61	AATF	Protein AATF	1.17269	0.11394	0.000158123	6	89
Q8N4T8	CBR4	Carbonyl reductase family member 4	1.17228	0.0531373	0.00154124	41	23
P30085	CMPK1	UMP-CMP kinase	1.17201	0.0430207	0.000659638	53	0
A0A1B0GUS4	UBE2L5	Ubiquitin-conjugating enzyme E2 L5	1.17164	0.0448104	2.1263e-06	22	58
Q99714	HSD17B10	3-hydroxyacyl-CoA dehydrogenase type-2	1.17146	0.0225387	1.28997e-08	53	0
Q16655	MLANA	Melanoma antigen recognized by T-cells 1	1.17133	0.0548801	1.25734e-05	18	66
P09622	DLD	Dihydrolipoyl dehydrogenase, mitochondrial	1.1713	0.026594	4.6541e-07	53	0
P22695	UQCRC2	Cytochrome b-c1 complex subunit 2, mitochondrial	1.17071	0.0321375	1.43142e-05	53	0
O00478	BTN3A3	Butyrophilin subfamily 3 member A3	1.1707	0.09866	0.000181966	8	85
O15498	YKT6	Synaptobrevin homolog YKT6	1.17068	0.0233407	1.29598e-08	49	8
Q8NC56	LEMD2	LEM domain-containing protein 2	1.17062	0.0319533	1.32158e-05	53	0
Q9Y3T9	NOC2L	Nucleolar complex protein 2 homolog	1.1706	0.053209	0.000548692	33	38
Q9H2W6	MRPL46	39S ribosomal protein L46, mitochondrial	1.17039	0.0581939	8.06591e-06	15	72
Q567U6	CCDC93	Coiled-coil domain-containing protein 93	1.17017	0.0492428	3.70959e-08	12	77
Q00839	HNRNPU	Heterogeneous nuclear ribonucleoprotein U	1.17004	0.032969	2.27846e-05	53	0
O95433	AHSA1	Activator of 90 kDa heat shock protein ATPase homolog 1	1.16992	0.0225975	1.68603e-08	53	0
Q8IWV7	UBR1	E3 ubiquitin-protein ligase UBR1	1.16967	0.0707298	2.81817e-07	7	87
P18615	NELFE	Negative elongation factor E	1.16937	0.0865399	3.26386e-05	8	85
Q8NFF5	FLAD1	FAD synthase	1.16927	0.0408259	7.1427e-05	40	25
O75306	NDUFS2	NADH dehydrogenase [ubiquinone] iron-sulfur protein 2, mitochondrial	1.16923	0.0260942	4.02963e-07	53	0
Q9UBV2	SEL1L	Protein sel-1 homolog 1	1.1692	0.0528428	0.00324598	47	11
Q13464	ROCK1	Rho-associated protein kinase 1	1.16917	0.0632058	0.000319992	21	60
O15511	ARPC5	Actin-related protein 2/3 complex subunit 5	1.16904	0.0306943	6.78072e-06	52	2
P18031	PTPN1	Tyrosine-protein phosphatase non-receptor type 1	1.16864	0.0309202	5.72248e-06	50	6
P23246	SFPQ	Splicing factor, proline- and glutamine-rich	1.16838	0.0220685	1.19568e-08	53	0
P15121	AKR1B1	Aldo-keto reductase family 1 member B1	1.16754	0.0426534	0.000786327	53	0
P62942	FKBP1A	Peptidyl-prolyl cis-trans isomerase FKBP1A	1.16746	0.0530752	0.00246618	43	19
Q06830	PRDX1	Peroxiredoxin-1	1.16721	0.045083	0.00142822	53	0
P03891	MT-ND2	NADH-ubiquinone oxidoreductase chain 2	1.16711	0.0647517	1.01387e-05	12	77
Q13043	STK4	Serine/threonine-protein kinase 4	1.16656	0.0336259	7.53106e-07	33	38
Q9Y3B8	REXO2	Oligoribonuclease, mitochondrial	1.16651	0.0268265	8.87857e-08	42	21
O43312	MTSS1	Protein MTSS 1	1.16626	0.0745368	0.00553345	26	51
P37802	TAGLN2	Transgelin-2	1.16535	0.0340413	5.49084e-05	53	0
Q96MW5	COG8	Conserved oligomeric Golgi complex subunit 8	1.16514	0.0320244	1.69311e-06	39	26
Q9P2R3	ANKFY1	Rabankyrin-5	1.16486	0.0221643	2.15411e-08	53	0
P08575	PTPRC	Receptor-type tyrosine-protein phosphatase C	1.16483	0.0657412	0.013307	42	21
Q0JRZ9	FCHO2	F-BAR domain only protein 2	1.16475	0.0572166	0.000125109	21	60
P61964	WDR5	WD repeat-containing protein 5	1.16444	0.0432818	1.98726e-07	17	68
O95302	FKBP9	Peptidyl-prolyl cis-trans isomerase FKBP9	1.16431	0.0360755	0.000132198	53	0
Q9NZK5	ADA2	Adenosine deaminase 2	1.16418	0.0997683	0.00388534	13	75
Q9UM22	EPDR1	Mammalian ependymin-related protein 1	1.16399	0.0955012	0.0011994	11	79
A5D8V6	VPS37C	Vacuolar protein sorting-associated protein 37C	1.16335	0.0521875	0.00386676	47	11
Q86WB0	ZC3HC1	Nuclear-interacting partner of ALK	1.16332	0.0223051	1.98668e-09	42	21
P35244	RPA3	Replication protein A 14 kDa subunit	1.16306	0.0243996	1.16854e-07	50	6
Q2NL82	TSR1	Pre-rRNA-processing protein TSR1 homolog	1.16272	0.0617985	7.14765e-06	12	77
Q15046	KARS1	Lysine--tRNA ligase	1.16271	0.0303321	1.18765e-05	53	0
Q9BUQ8	DDX23	Probable ATP-dependent RNA helicase DDX23	1.16137	0.0232557	9.74453e-08	53	0
Q9BQ70	TCF25	Transcription factor 25	1.16126	0.0533623	1.28737e-05	17	68
P49721	PSMB2	Proteasome subunit beta type-2	1.16117	0.0349478	0.000110743	53	0
Q9Y333	LSM2	U6 snRNA-associated Sm-like protein LSm2	1.16101	0.0256698	3.5025e-07	49	8
O43143	DHX15	Pre-mRNA-splicing factor ATP-dependent RNA helicase DHX15	1.16077	0.0195507	2.00057e-09	53	0
Q96JH7	VCPIP1	Deubiquitinating protein VCIP135	1.16069	0.0472703	6.6483e-09	10	81
P23368	ME2	NAD-dependent malic enzyme, mitochondrial	1.16052	0.0285367	5.38558e-06	53	0
P61020	RAB5B	Ras-related protein Rab-5B	1.16035	0.0422846	0.00111416	53	0
Q9Y512	SAMM50	Sorting and assembly machinery component 50 homolog	1.16031	0.0255675	7.54984e-07	53	0
Q9BWM7	SFXN3	Sideroflexin-3	1.16013	0.0488977	0.00433709	53	0
O60518	RANBP6	Ran-binding protein 6	1.15986	0.0376952	3.86588e-06	29	45
Q9BV57	ADI1	1,2-dihydroxy-3-keto-5-methylthiopentene dioxygenase	1.15975	0.0556625	0.000128064	21	60
P29728	OAS2	2~-5~-oligoadenylate synthase 2	1.15973	0.0700174	0.00528466	27	49
P21283	ATP6V1C1	V-type proton ATPase subunit C 1	1.15926	0.0247659	4.64347e-07	53	0
O00203	AP3B1	AP-3 complex subunit beta-1	1.15891	0.0215502	2.6118e-08	53	0
Q96JJ7	TMX3	Protein disulfide-isomerase TMX3	1.15881	0.025244	7.07488e-07	53	0
Q92598	HSPH1	Heat shock protein 105 kDa	1.15871	0.0340538	9.52004e-05	53	0
Q8TCD5	NT5C	5~(3~)-deoxyribonucleotidase, cytosolic type	1.1585	0.0355544	0.000171125	53	0
P51570	GALK1	Galactokinase	1.15837	0.0228918	1.03402e-07	53	0
Q9UIJ7	AK3	GTP:AMP phosphotransferase AK3, mitochondrial	1.15801	0.0362985	0.00023133	53	0
P32455	GBP1	Guanylate-binding protein 1	1.15722	0.097348	0.100528	41	23
Q92896	GLG1	Golgi apparatus protein 1	1.15695	0.0415831	0.00115681	53	0
Q13868	EXOSC2	Exosome complex component RRP4	1.15655	0.0454741	1.23759e-05	22	58
Q13404	UBE2V1	Ubiquitin-conjugating enzyme E2 variant 1	1.15647	0.0206833	1.721e-11	31	42
O76014	KRT37	Keratin, type I cuticular Ha7	1.15635	0.0883389	0.000127945	8	85
P51571	SSR4	Translocon-associated protein subunit delta	1.15609	0.0491253	0.00200065	42	21
Q9H3K2	GHITM	Growth hormone-inducible transmembrane protein	1.15603	0.0407334	0.000304748	43	19
P06753	TPM3	Tropomyosin alpha-3 chain	1.15603	0.0487079	0.00513386	53	0
O15118	NPC1	NPC intracellular cholesterol transporter 1	1.156	0.0616932	6.66302e-06	11	79
P52701	MSH6	DNA mismatch repair protein Msh6	1.15592	0.033749	1.33276e-05	40	25
O43809	NUDT21	Cleavage and polyadenylation specificity factor subunit 5	1.15567	0.0315574	4.24248e-05	53	0
Q92888	ARHGEF1	Rho guanine nucleotide exchange factor 1	1.15566	0.0246705	2.48267e-07	48	9
O15042	U2SURP	U2 snRNP-associated SURP motif-containing protein	1.15541	0.0391335	0.000481923	50	6
Q9UDW1	UQCR10	Cytochrome b-c1 complex subunit 9	1.1553	0.0624601	0.00142521	24	55
Q92890	UFD1	Ubiquitin recognition factor in ER-associated degradation protein 1	1.15491	0.0421745	3.88056e-07	17	68
P29218	IMPA1	Inositol monophosphatase 1	1.15487	0.0336514	0.000111164	53	0
O95486	SEC24A	Protein transport protein Sec24A	1.15487	0.039123	0.000234161	44	17
B5ME19	EIF3CL	Eukaryotic translation initiation factor 3 subunit C-like protein	1.15454	0.0229172	1.75079e-07	53	0
P54920	NAPA	Alpha-soluble NSF attachment protein	1.15413	0.0209926	2.87311e-08	53	0
P49406	MRPL19	39S ribosomal protein L19, mitochondrial	1.15409	0.0318112	3.58125e-05	50	6
Q12913	PTPRJ	Receptor-type tyrosine-protein phosphatase eta	1.15405	0.0593214	0.0148533	47	11
Q6UWU2	GLB1L	Beta-galactosidase-1-like protein	1.15399	0.0711057	0.000215541	13	75
Q9UBQ5	EIF3K	Eukaryotic translation initiation factor 3 subunit K	1.15399	0.0399422	0.000919599	53	0
Q9BV79	MECR	Enoyl-[acyl-carrier-protein] reductase, mitochondrial	1.15392	0.0416159	5.60294e-05	31	42
Q13263	TRIM28	Transcription intermediary factor 1-beta	1.1539	0.0242155	5.76397e-07	53	0
P62875	POLR2L	DNA-directed RNA polymerases I, II, and III subunit RPABC5	1.1539	0.0658139	4.53855e-07	7	87
Q9NRX1	PNO1	RNA-binding protein PNO1	1.15375	0.0413153	7.9211e-05	33	38
P53396	ACLY	ATP-citrate synthase	1.15364	0.0234266	3.09351e-07	53	0
O75400	PRPF40A	Pre-mRNA-processing factor 40 homolog A	1.15294	0.0371556	0.000245394	48	9
P61077	UBE2D3	Ubiquitin-conjugating enzyme E2 D3	1.15279	0.0269586	4.60346e-06	53	0
Q9H488	POFUT1	GDP-fucose protein O-fucosyltransferase 1	1.15276	0.0294114	5.1506e-07	35	34
Q96PY5	FMNL2	Formin-like protein 2	1.15271	0.040199	0.00106754	53	0
O14933	UBE2L6	Ubiquitin/ISG15-conjugating enzyme E2 L6	1.15233	0.102496	0.0107623	14	74
Q8NAV1	PRPF38A	Pre-mRNA-splicing factor 38A	1.15229	0.069368	2.91036e-05	10	81
Q96GQ7	DDX27	Probable ATP-dependent RNA helicase DDX27	1.15141	0.0853848	1.50927e-05	6	89
P49368	CCT3	T-complex protein 1 subunit gamma	1.15126	0.0250706	1.53031e-06	53	0
O15455	TLR3	Toll-like receptor 3	1.15125	0.0569955	0.00024759	20	62
Q9BR76	CORO1B	Coronin-1B	1.15063	0.0375911	0.000596611	53	0
Q12824	SMARCB1	SWI/SNF-related matrix-associated actin-dependent regulator of chromatin subfamily B member 1	1.15048	0.0657656	2.35289e-06	8	85
P40227	CCT6A	T-complex protein 1 subunit zeta	1.15038	0.0207803	3.94379e-08	53	0
P61254	RPL26	60S ribosomal protein L26	1.14983	0.0761509	6.59618e-05	9	83
Q9H2U2	PPA2	Inorganic pyrophosphatase 2, mitochondrial	1.1495	0.0336964	0.000176321	53	0
O15143	ARPC1B	Actin-related protein 2/3 complex subunit 1B	1.14945	0.0501521	0.00865495	53	0
O75592	MYCBP2	E3 ubiquitin-protein ligase MYCBP2	1.14872	0.0516633	4.06155e-05	18	66
P19474	TRIM21	E3 ubiquitin-protein ligase TRIM21	1.14816	0.0443978	0.000527014	36	32
P54727	RAD23B	UV excision repair protein RAD23 homolog B	1.14812	0.0243124	1.26864e-06	53	0
P35579	MYH9	Myosin-9	1.14805	0.0263902	5.42938e-06	53	0
Q15629	TRAM1	Translocating chain-associated membrane protein 1	1.1475	0.0934805	0.0016425	10	81
O60568	PLOD3	Multifunctional procollagen lysine hydroxylase and glycosyltransferase LH3	1.14731	0.0274391	1.11856e-05	53	0
Q30154	HLA-DRB5	HLA class II histocompatibility antigen, DR beta 5 chain	1.14718	0.075217	0.00751963	22	58
P20702	ITGAX	Integrin alpha-X	1.14714	0.0916334	0.00218756	11	79
P05386	RPLP1	60S acidic ribosomal protein P1	1.14663	0.0428966	0.00288693	53	0
O75131	CPNE3	Copine-3	1.1465	0.0209334	8.07254e-08	53	0
O00154	ACOT7	Cytosolic acyl coenzyme A thioester hydrolase	1.14637	0.0369342	0.000665009	53	0
Q9NPQ8	RIC8A	Synembryn-A	1.14614	0.0482025	0.00759131	53	0
Q3KQV9	UAP1L1	UDP-N-acetylhexosamine pyrophosphorylase-like protein 1	1.14614	0.0338496	0.000245456	53	0
P0DI81	TRAPPC2	Trafficking protein particle complex subunit 2	1.14586	0.038251	9.92888e-09	13	75
P27824	CANX	Calnexin	1.14558	0.0338432	0.000255971	53	0
Q9Y5K6	CD2AP	CD2-associated protein	1.14541	0.0445341	0.000230123	30	43
P30566	ADSL	Adenylosuccinate lyase	1.14538	0.0335199	0.00023181	53	0
P41240	CSK	Tyrosine-protein kinase CSK	1.14493	0.0312092	5.55338e-05	49	8
Q9NRX2	MRPL17	39S ribosomal protein L17, mitochondrial	1.14447	0.0463437	0.00284633	44	17
P24821	TNC	Tenascin	1.14442	0.0866479	0.0438974	29	45
Q08380	LGALS3BP	Galectin-3-binding protein	1.14419	0.0379831	0.0010459	53	0
Q5T1M5	FKBP15	FK506-binding protein 15	1.14398	0.0305616	7.80985e-05	53	0
P48729	CSNK1A1	Casein kinase I isoform alpha	1.14397	0.0245592	2.52141e-06	53	0
P41223	BUD31	Protein BUD31 homolog	1.14371	0.0726752	0.00306071	18	66
P10644	PRKAR1A	cAMP-dependent protein kinase type I-alpha regulatory subunit	1.1437	0.0355994	0.000538524	53	0
Q86YH6	PDSS2	Decaprenyl-diphosphate synthase subunit 2	1.14359	0.0540246	3.17512e-08	7	87
P31948	STIP1	Stress-induced-phosphoprotein 1	1.1435	0.0263925	9.03963e-06	53	0
O75027	ABCB7	ATP-binding cassette sub-family B member 7, mitochondrial	1.14323	0.0375287	4.34517e-05	32	40
Q9UL03	INTS6	Integrator complex subunit 6	1.14321	0.047563	7.94806e-06	16	70
Q12874	SF3A3	Splicing factor 3A subunit 3	1.14268	0.0297615	6.09639e-05	53	0
Q9Y6G5	COMMD10	COMM domain-containing protein 10	1.1423	0.0590884	5.00819e-05	13	75
Q9NZ08	ERAP1	Endoplasmic reticulum aminopeptidase 1	1.14229	0.045541	0.00601133	53	0
P47985	UQCRFS1	Cytochrome b-c1 complex subunit Rieske, mitochondrial	1.14226	0.0264699	1.08665e-05	53	0
Q9BQA9	CYBC1	Cytochrome b-245 chaperone 1	1.14213	0.0589033	0.000284858	17	68
P98196	ATP11A	Probable phospholipid-transporting ATPase IH	1.14192	0.0511691	4.51653e-05	17	68
Q9UQ13	SHOC2	Leucine-rich repeat protein SHOC-2	1.14148	0.0357433	3.94873e-05	34	36
Q8NF50	DOCK8	Dedicator of cytokinesis protein 8	1.14131	0.0548875	2.07442e-06	10	81
P31937	HIBADH	3-hydroxyisobutyrate dehydrogenase, mitochondrial	1.1409	0.0219023	4.51571e-07	53	0
O75477	ERLIN1	Erlin-1	1.14077	0.0587579	0.000141798	15	72
P26639	TARS1	Threonine--tRNA ligase 1, cytoplasmic	1.14057	0.0244148	3.43424e-06	53	0
P35610	SOAT1	Sterol O-acyltransferase 1	1.14033	0.0696528	0.00255915	18	66
Q9BRF8	CPPED1	Serine/threonine-protein phosphatase CPPED1	1.14033	0.0344525	0.000479708	53	0
P50990	CCT8	T-complex protein 1 subunit theta	1.14024	0.0231754	1.4265e-06	53	0
Q8IY21	DDX60	Probable ATP-dependent RNA helicase DDX60	1.14024	0.0572609	0.0205516	47	11
P14678	SNRPB	Small nuclear ribonucleoprotein-associated proteins B and B~	1.14002	0.0274349	2.42149e-05	53	0
P41226	UBA7	Ubiquitin-like modifier-activating enzyme 7	1.14001	0.0591827	0.000673892	19	64
Q96C23	GALM	Galactose mutarotase	1.13988	0.054089	0.0212078	53	0
Q96I59	NARS2	Probable asparagine--tRNA ligase, mitochondrial	1.13981	0.0397975	0.0022072	53	0
Q9H4A4	RNPEP	Aminopeptidase B	1.13977	0.0257214	9.05377e-06	53	0
P00846	MT-ATP6	ATP synthase subunit a	1.13959	0.0697151	0.0216156	32	40
Q9Y5P4	CERT1	Ceramide transfer protein	1.13937	0.028712	2.43922e-05	48	9
Q9Y2S2	CRYL1	Lambda-crystallin homolog	1.13934	0.0583253	0.0326621	53	0
P68036	UBE2L3	Ubiquitin-conjugating enzyme E2 L3	1.13927	0.0315534	3.29232e-06	31	42
Q13200	PSMD2	26S proteasome non-ATPase regulatory subunit 2	1.13912	0.0237373	2.51946e-06	53	0
P48643	CCT5	T-complex protein 1 subunit epsilon	1.13869	0.0254469	8.62427e-06	53	0
P39748	FEN1	Flap endonuclease 1	1.1382	0.0304743	2.96664e-05	43	19
Q9P015	MRPL15	39S ribosomal protein L15, mitochondrial	1.13806	0.0408628	1.38838e-07	13	75
P48960	ADGRE5	Adhesion G protein-coupled receptor E5	1.13798	0.0367747	0.00115852	53	0
P51531	SMARCA2	Probable global transcription activator SNF2L2	1.13769	0.0370806	1.79105e-05	27	49
P61160	ACTR2	Actin-related protein 2	1.13691	0.0210692	3.72112e-07	53	0
Q99832	CCT7	T-complex protein 1 subunit eta	1.13662	0.028529	6.09662e-05	53	0
P35268	RPL22	60S ribosomal protein L22	1.13648	0.0285417	6.22119e-05	53	0
Q96C86	DCPS	m7GpppX diphosphatase	1.13642	0.0279732	4.73823e-05	53	0
Q9Y6C9	MTCH2	Mitochondrial carrier homolog 2	1.1359	0.0410465	0.00369532	53	0
P00387	CYB5R3	NADH-cytochrome b5 reductase 3	1.13574	0.0284329	6.35493e-05	53	0
Q9NSE4	IARS2	Isoleucine--tRNA ligase, mitochondrial	1.13565	0.0277819	4.646e-05	53	0
Q8ND90	PNMA1	Paraneoplastic antigen Ma1	1.13547	0.0761922	0.00075972	11	79
Q9Y3B3	TMED7	Transmembrane emp24 domain-containing protein 7	1.13539	0.0297169	6.10308e-05	48	9
P05198	EIF2S1	Eukaryotic translation initiation factor 2 subunit 1	1.13529	0.01904	6.05021e-08	53	0
Q5T011	SZT2	KICSTOR complex protein SZT2	1.13528	0.0418815	0.000446199	33	38
Q9Y666	SLC12A7	Solute carrier family 12 member 7	1.13519	0.0501371	2.12032e-06	11	79
O15226	NKRF	NF-kappa-B-repressing factor	1.13518	0.0725565	6.63325e-06	6	89
P08754	GNAI3	Guanine nucleotide-binding protein G(i) subunit alpha	1.13514	0.0218672	5.91143e-08	40	25
Q00013	MPP1	55 kDa erythrocyte membrane protein	1.13467	0.0520904	0.00455072	34	36
Q15904	ATP6AP1	V-type proton ATPase subunit S1	1.13461	0.0875167	0.00120806	9	83
Q9H6R4	NOL6	Nucleolar protein 6	1.13446	0.0333599	0.000175061	44	17
Q9UMY4	SNX12	Sorting nexin-12	1.13439	0.0229091	2.47497e-06	53	0
P51398	DAP3	28S ribosomal protein S29, mitochondrial	1.13436	0.033201	0.000250926	47	11
Q92878	RAD50	DNA repair protein RAD50	1.13432	0.0235591	4.03883e-06	53	0
Q96DI7	SNRNP40	U5 small nuclear ribonucleoprotein 40 kDa protein	1.13416	0.037088	1.47043e-06	19	64
Q92614	MYO18A	Unconventional myosin-XVIIIa	1.13413	0.0288956	9.32014e-05	53	0
O94776	MTA2	Metastasis-associated protein MTA2	1.1339	0.0391008	3.83245e-06	19	64
P30040	ERP29	Endoplasmic reticulum resident protein 29	1.13379	0.0414093	0.00450367	53	0
P08962	CD63	CD63 antigen	1.1336	0.0626186	0.0526669	52	2
O75223	GGCT	Gamma-glutamylcyclotransferase	1.13334	0.0471787	0.000194695	22	58
Q13838	DDX39B	Spliceosome RNA helicase DDX39B	1.13334	0.0259618	2.17267e-05	53	0
Q13242	SRSF9	Serine/arginine-rich splicing factor 9	1.13332	0.0543559	1.04261e-05	11	79
O43861	ATP9B	Probable phospholipid-transporting ATPase IIB	1.13317	0.0467491	0.00358447	39	26
P29590	PML	Protein PML	1.13307	0.0467549	0.0114607	53	0
Q8IZQ5	SELENOH	Selenoprotein H	1.13294	0.0978633	0.00582486	10	81
P62495	ETF1	Eukaryotic peptide chain release factor subunit 1	1.13284	0.0183286	4.02466e-08	53	0
P33897	ABCD1	ATP-binding cassette sub-family D member 1	1.13257	0.0514344	0.00138762	26	51
Q9UIQ6	LNPEP	Leucyl-cystinyl aminopeptidase	1.13189	0.0403203	0.00404155	53	0
P41227	NAA10	N-alpha-acetyltransferase 10	1.13148	0.055646	8.82292e-06	10	81
Q96C36	PYCR2	Pyrroline-5-carboxylate reductase 2	1.1312	0.0660021	0.0116312	26	51
Q4KMQ2	ANO6	Anoctamin-6	1.13099	0.0512949	1.86126e-09	5	91
P43686	PSMC4	26S proteasome regulatory subunit 6B	1.13097	0.019392	1.74321e-07	53	0
P33992	MCM5	DNA replication licensing factor MCM5	1.13036	0.0532462	0.00267357	27	49
Q9NUS5	AP5S1	AP-5 complex subunit sigma-1	1.13034	0.0488279	0.00038323	22	58
P40763	STAT3	Signal transducer and activator of transcription 3	1.1303	0.0305221	0.000269717	53	0
P51149	RAB7A	Ras-related protein Rab-7a	1.12992	0.0205559	6.38628e-07	53	0
P20160	AZU1	Azurocidin	1.12973	0.126964	0.0187893	8	85
Q8IWB7	WDFY1	WD repeat and FYVE domain-containing protein 1	1.12952	0.0414531	0.00462055	50	6
P36404	ARL2	ADP-ribosylation factor-like protein 2	1.12942	0.0314249	0.00040989	53	0
P49585	PCYT1A	Choline-phosphate cytidylyltransferase A	1.12937	0.0734519	1.60678e-05	6	89
Q9BTE3	MCMBP	Mini-chromosome maintenance complex-binding protein	1.12886	0.0515046	3.4007e-06	10	81
P46781	RPS9	40S ribosomal protein S9	1.12867	0.0392896	0.00396976	53	0
P57764	GSDMD	Gasdermin-D	1.12847	0.0522244	0.0274661	53	0
Q9NXG2	THUMPD1	THUMP domain-containing protein 1	1.12827	0.031205	0.000134307	44	17
Q01459	CTBS	Di-N-acetylchitobiase	1.12783	0.0949355	0.000193919	5	91
Q9ULX7	CA14	Carbonic anhydrase 14	1.12775	0.0592399	0.00745226	27	49
O60287	URB1	Nucleolar pre-ribosomal-associated protein 1	1.1277	0.0387845	0.00145962	43	19
O15260	SURF4	Surfeit locus protein 4	1.12739	0.0326355	0.00074398	53	0
Q6NUK1	SLC25A24	Calcium-binding mitochondrial carrier protein SCaMC-1	1.12729	0.0215343	2.17567e-06	53	0
Q96RF0	SNX18	Sorting nexin-18	1.12728	0.0543062	7.06555e-05	13	75
Q9Y624	F11R	Junctional adhesion molecule A	1.12702	0.0464305	0.00981852	47	11
Q8NEW0	SLC30A7	Zinc transporter 7	1.12696	0.061205	0.000207409	12	77
Q16629	SRSF7	Serine/arginine-rich splicing factor 7	1.12686	0.0351743	0.000165166	35	34
Q14C86	GAPVD1	GTPase-activating protein and VPS9 domain-containing protein 1	1.12686	0.0341828	1.77096e-07	16	70
O15514	POLR2D	DNA-directed RNA polymerase II subunit RPB4	1.12668	0.0353273	6.23775e-07	17	68
Q96RQ9	IL4I1	L-amino-acid oxidase	1.12662	0.0630825	0.00402743	20	62
Q14738	PPP2R5D	Serine/threonine-protein phosphatase 2A 56 kDa regulatory subunit delta isoform	1.12619	0.0314529	0.000549635	53	0
Q92597	NDRG1	Protein NDRG1	1.12617	0.0468778	0.0162452	53	0
Q9H446	RWDD1	RWD domain-containing protein 1	1.12612	0.044832	0.00137112	31	42
P11387	TOP1	DNA topoisomerase 1	1.12608	0.0443032	0.00923386	50	6
P82932	MRPS6	28S ribosomal protein S6, mitochondrial	1.12607	0.0509714	1.52624e-07	7	87
Q9Y2R5	MRPS17	28S ribosomal protein S17, mitochondrial	1.12592	0.0468953	6.87496e-05	17	68
P45880	VDAC2	Voltage-dependent anion-selective channel protein 2	1.12563	0.0313592	0.00055774	53	0
Q9H1V8	SLC6A17	Sodium-dependent neutral amino acid transporter SLC6A17	1.12554	0.0679109	2.49097e-05	7	87
P10619	CTSA	Lysosomal protective protein	1.12549	0.0417132	0.00763433	53	0
Q96A72	MAGOHB	Protein mago nashi homolog 2	1.12546	0.026198	3.96583e-05	50	6
P78371	CCT2	T-complex protein 1 subunit beta	1.12536	0.0205039	1.1986e-06	53	0
Q14011	CIRBP	Cold-inducible RNA-binding protein	1.12533	0.0416791	0.00765381	53	0
Q6GMV2	SMYD5	SET and MYND domain-containing protein 5	1.12527	0.0250329	5.14018e-06	42	21
Q9BT73	PSMG3	Proteasome assembly chaperone 3	1.12505	0.0579017	1.99338e-06	7	87
P61086	UBE2K	Ubiquitin-conjugating enzyme E2 K	1.12478	0.0273013	0.000112455	53	0
Q15370	ELOB	Elongin-B	1.12477	0.0635814	0.0141573	27	49
Q07020	RPL18	60S ribosomal protein L18	1.12476	0.0431263	0.0100603	53	0
P27797	CALR	Calreticulin	1.12458	0.032251	0.000825931	53	0
O15327	INPP4B	Inositol polyphosphate 4-phosphatase type II	1.12457	0.0538376	5.68577e-07	7	87
O95425	SVIL	Supervillin	1.12422	0.0761393	0.00177208	11	79
Q8N9N2	ASCC1	Activating signal cointegrator 1 complex subunit 1	1.12396	0.0301807	2.51694e-06	26	51
Q9HBG4	ATP6V0A4	V-type proton ATPase 116 kDa subunit a isoform 4	1.12395	0.0901659	0.00336613	9	83
Q13247	SRSF6	Serine/arginine-rich splicing factor 6	1.12381	0.0418343	8.77448e-07	12	77
Q641Q2	WASHC2A	WASH complex subunit 2A	1.12355	0.069217	0.0154853	23	57
Q04837	SSBP1	Single-stranded DNA-binding protein, mitochondrial	1.12352	0.0442556	0.0120088	52	2
Q92608	DOCK2	Dedicator of cytokinesis protein 2	1.12345	0.0884439	0.0152775	14	74
Q9HBH5	RDH14	Retinol dehydrogenase 14	1.12339	0.0398148	0.00255915	43	19
P55263	ADK	Adenosine kinase	1.1233	0.0347991	0.00178745	52	2
Q13488	TCIRG1	V-type proton ATPase 116 kDa subunit a3	1.1232	0.0434333	0.0114648	53	0
Q08J23	NSUN2	RNA cytosine C(5)-methyltransferase NSUN2	1.12295	0.0289915	0.000287205	53	0
Q9H6R3	ACSS3	Acyl-CoA synthetase short-chain family member 3, mitochondrial	1.12244	0.0337108	0.000102433	33	38
Q9H0V1	TMEM168	Transmembrane protein 168	1.12232	0.0345368	0.00059723	42	21
P08581	MET	Hepatocyte growth factor receptor	1.12223	0.034512	0.0013405	49	8
P31749	AKT1	RAC-alpha serine/threonine-protein kinase	1.12217	0.0259332	3.07661e-06	35	34
Q9H3K6	BOLA2	BolA-like protein 2	1.12215	0.0783933	0.0140278	17	68
P42126	ECI1	Enoyl-CoA delta isomerase 1, mitochondrial	1.12199	0.0442948	0.013939	53	0
O15162	PLSCR1	Phospholipid scramblase 1	1.12177	0.0592418	4.65371e-06	7	87
O95777	LSM8	U6 snRNA-associated Sm-like protein LSm8	1.12172	0.037722	0.00442259	53	0
P55036	PSMD4	26S proteasome non-ATPase regulatory subunit 4	1.12127	0.0429742	0.00777833	47	11
Q96HW7	INTS4	Integrator complex subunit 4	1.12109	0.0393808	5.57226e-06	16	70
Q9HB71	CACYBP	Calcyclin-binding protein	1.12073	0.0361413	0.00192126	47	11
Q16531	DDB1	DNA damage-binding protein 1	1.12062	0.0172186	8.86917e-08	53	0
Q13459	MYO9B	Unconventional myosin-IXb	1.12057	0.0334005	0.00147943	52	2
O94901	SUN1	SUN domain-containing protein 1	1.12049	0.0413343	0.00945059	53	0
Q9BVC4	MLST8	Target of rapamycin complex subunit LST8	1.11992	0.0827059	0.000235872	6	89
Q8WVJ2	NUDCD2	NudC domain-containing protein 2	1.11971	0.0369004	0.000893046	38	28
Q00059	TFAM	Transcription factor A, mitochondrial	1.11966	0.0385211	0.00335101	46	13
Q8TD55	PLEKHO2	Pleckstrin homology domain-containing family O member 2	1.11955	0.0859223	0.045908	21	60
P61626	LYZ	Lysozyme C	1.11936	0.120805	0.11269	17	68
P53007	SLC25A1	Tricarboxylate transport protein, mitochondrial	1.11902	0.0253657	7.85987e-05	53	0
Q7Z2W9	MRPL21	39S ribosomal protein L21, mitochondrial	1.11858	0.0426027	0.00673522	44	17
Q15628	TRADD	Tumor necrosis factor receptor type 1-associated DEATH domain protein	1.11837	0.0336831	0.000565925	41	23
P49356	FNTB	Protein farnesyltransferase subunit beta	1.11819	0.0653561	0.00096864	12	77
Q9UHB9	SRP68	Signal recognition particle subunit SRP68	1.11812	0.0231427	2.37015e-05	53	0
Q9NYF8	BCLAF1	Bcl-2-associated transcription factor 1	1.11811	0.0673835	0.00610831	17	68
P47756	CAPZB	F-actin-capping protein subunit beta	1.11805	0.0288556	0.000433132	53	0
Q9UHI5	SLC7A8	Large neutral amino acids transporter small subunit 2	1.11765	0.0866644	0.00369519	9	83
P12110	COL6A2	Collagen alpha-2(VI) chain	1.11763	0.0842672	0.172251	46	13
P11310	ACADM	Medium-chain specific acyl-CoA dehydrogenase, mitochondrial	1.11751	0.0276255	0.000275253	53	0
Q9BXX0	EMILIN2	EMILIN-2	1.11706	0.0959435	0.00314318	7	87
Q9P265	DIP2B	Disco-interacting protein 2 homolog B	1.11684	0.0285264	0.000426107	53	0
P49959	MRE11	Double-strand break repair protein MRE11	1.11664	0.0390201	0.00634651	50	6
Q92945	KHSRP	Far upstream element-binding protein 2	1.11659	0.0314793	0.00125295	53	0
Q8NI27	THOC2	THO complex subunit 2	1.11653	0.0388013	0.000681833	31	42
Q96EL2	MRPS24	28S ribosomal protein S24, mitochondrial	1.11652	0.0550768	7.44246e-07	6	89
Q14161	GIT2	ARF GTPase-activating protein GIT2	1.11644	0.0546691	0.00793451	27	49
Q9P291	ARMCX1	Armadillo repeat-containing X-linked protein 1	1.11615	0.0494732	0.000692386	19	64
P08473	MME	Neprilysin	1.116	0.0773617	0.00716459	13	75
Q5VZ89	DENND4C	DENN domain-containing protein 4C	1.11574	0.0511002	0.00101142	19	64
O94919	ENDOD1	Endonuclease domain-containing 1 protein	1.11574	0.0337698	0.00260561	53	0
Q14498	RBM39	RNA-binding protein 39	1.11553	0.0264915	0.000203247	53	0
Q9H1Z9	TSPAN10	Tetraspanin-10	1.11536	0.0761611	0.138714	46	13
P53618	COPB1	Coatomer subunit beta	1.1153	0.0155906	3.11041e-08	53	0
P11216	PYGB	Glycogen phosphorylase, brain form	1.11526	0.0407237	0.0114547	53	0
Q7Z3J2	VPS35L	VPS35 endosomal protein sorting factor-like	1.11524	0.0331126	0.00226388	53	0
P61289	PSME3	Proteasome activator complex subunit 3	1.11502	0.0424774	0.015302	53	0
Q9NRG9	AAAS	Aladin	1.11451	0.0237089	1.33939e-05	44	17
Q14696	MESD	LRP chaperone MESD	1.11437	0.0387502	0.00462671	45	15
Q8WX92	NELFB	Negative elongation factor B	1.11415	0.0349317	0.00306866	50	6
Q9NYY8	FASTKD2	FAST kinase domain-containing protein 2, mitochondrial	1.11385	0.0604389	0.00533482	19	64
P46782	RPS5	40S ribosomal protein S5	1.11372	0.0250608	0.000122556	53	0
Q96KR1	ZFR	Zinc finger RNA-binding protein	1.11368	0.0282661	3.93673e-08	16	70
Q969H8	MYDGF	Myeloid-derived growth factor	1.11302	0.044551	3.80024e-07	8	85
Q86W50	METTL16	RNA N6-adenosine-methyltransferase METTL16	1.11293	0.0375663	0.000307462	27	49
Q9Y6B6	SAR1B	GTP-binding protein SAR1b	1.11293	0.0395291	0.00264938	37	30
P27987	ITPKB	Inositol-trisphosphate 3-kinase B	1.11252	0.0788272	0.000676671	7	87
Q7L5Y1	ENOSF1	Mitochondrial enolase superfamily member 1	1.11231	0.0584872	0.00794019	22	58
O75312	ZPR1	Zinc finger protein ZPR1	1.11218	0.0747336	0.000152422	6	89
Q9H0D6	XRN2	5~-3~ exoribonuclease 2	1.11215	0.0233515	5.74308e-05	53	0
P51452	DUSP3	Dual specificity protein phosphatase 3	1.11214	0.02585	0.000216269	53	0
Q9HD26	GOPC	Golgi-associated PDZ and coiled-coil motif-containing protein	1.11206	0.0428636	1.43142e-05	13	75
Q5VTL8	PRPF38B	Pre-mRNA-splicing factor 38B	1.11135	0.0532447	0.000184022	12	77
P19634	SLC9A1	Sodium/hydrogen exchanger 1	1.11132	0.0922908	0.0174391	11	79
Q7Z3K3	POGZ	Pogo transposable element with ZNF domain	1.11126	0.0372714	0.000722531	31	42
Q13315	ATM	Serine-protein kinase ATM	1.11126	0.0393434	0.00752291	47	11
Q8TDD1	DDX54	ATP-dependent RNA helicase DDX54	1.11115	0.0682776	0.0534571	31	42
Q04206	RELA	Transcription factor p65	1.11112	0.0475792	0.000391995	17	68
Q96EY1	DNAJA3	DnaJ homolog subfamily A member 3, mitochondrial	1.11107	0.0509579	0.042238	50	6
O14602	EIF1AY	Eukaryotic translation initiation factor 1A, Y-chromosomal	1.11106	0.0318605	0.00138858	48	9
Q5JTZ9	AARS2	Alanine--tRNA ligase, mitochondrial	1.11105	0.0294149	0.000211802	40	25
Q7Z7L8	C11orf96	Uncharacterized protein C11orf96	1.11101	0.0595845	6.83184e-06	6	89
Q16822	PCK2	Phosphoenolpyruvate carboxykinase [GTP], mitochondrial	1.11085	0.0461729	0.0217214	47	11
Q8WTT2	NOC3L	Nucleolar complex protein 3 homolog	1.11046	0.0546177	0.0142666	29	45
P04632	CAPNS1	Calpain small subunit 1	1.1103	0.0235429	8.03346e-05	53	0
P62314	SNRPD1	Small nuclear ribonucleoprotein Sm D1	1.11019	0.0201928	8.6498e-06	53	0
O00487	PSMD14	26S proteasome non-ATPase regulatory subunit 14	1.11006	0.0304837	0.00159101	53	0
P12236	SLC25A6	ADP/ATP translocase 3	1.10989	0.0393916	0.0124861	53	0
P30049	ATP5F1D	ATP synthase subunit delta, mitochondrial	1.10984	0.0317143	0.00234692	53	0
P15498	VAV1	Proto-oncogene vav	1.10964	0.076103	0.00122517	8	85
Q9UKM9	RALY	RNA-binding protein Raly	1.10921	0.0333831	0.0038527	53	0
Q96ST2	IWS1	Protein IWS1 homolog	1.10906	0.0539027	8.7052e-05	10	81
Q9Y2R9	MRPS7	28S ribosomal protein S7, mitochondrial	1.10886	0.0357085	1.07685e-05	17	68
Q86TX2	ACOT1	Acyl-coenzyme A thioesterase 1	1.10883	0.0500678	0.000112503	12	77
Q9Y4P1	ATG4B	Cysteine protease ATG4B	1.10865	0.0530252	7.34731e-05	10	81
Q86VR2	RETREG3	Reticulophagy regulator 3	1.10843	0.0561097	1.30134e-05	7	87
Q9BWS9	CHID1	Chitinase domain-containing protein 1	1.10826	0.0252169	0.00024513	53	0
P48651	PTDSS1	Phosphatidylserine synthase 1	1.10821	0.0741871	0.00108126	8	85
Q07960	ARHGAP1	Rho GTPase-activating protein 1	1.10801	0.0256359	0.000305648	53	0
P04839	CYBB	Cytochrome b-245 heavy chain	1.10796	0.0628911	0.0270024	26	51
P56134	ATP5MF	ATP synthase subunit f, mitochondrial	1.10775	0.0309737	0.00224767	53	0
Q9BXR0	QTRT1	Queuine tRNA-ribosyltransferase catalytic subunit 1	1.10762	0.0555135	0.000151899	10	81
P11802	CDK4	Cyclin-dependent kinase 4	1.1075	0.0568026	5.38976e-06	6	89
Q9BW92	TARS2	Threonine--tRNA ligase, mitochondrial	1.10742	0.0422607	0.00614668	36	32
Q12849	GRSF1	G-rich sequence factor 1	1.10734	0.0497703	0.000319992	14	74
Q7Z392	TRAPPC11	Trafficking protein particle complex subunit 11	1.10729	0.0489685	0.000790051	17	68
P07355	ANXA2	Annexin A2	1.10713	0.0381711	0.0119559	53	0
O00151	PDLIM1	PDZ and LIM domain protein 1	1.10712	0.0618603	0.00146767	12	77
Q99538	LGMN	Legumain	1.10704	0.0806111	0.205952	49	8
Q9NX63	CHCHD3	MICOS complex subunit MIC19	1.10647	0.0387078	0.013643	53	0
Q9UMS0	NFU1	NFU1 iron-sulfur cluster scaffold homolog, mitochondrial	1.10629	0.0429877	4.4683e-06	10	81
Q9NQR4	NIT2	Omega-amidase NIT2	1.10628	0.021349	3.50217e-05	53	0
Q9UJ70	NAGK	N-acetyl-D-glucosamine kinase	1.10606	0.0342891	0.00599866	53	0
Q6UB35	MTHFD1L	Monofunctional C1-tetrahydrofolate synthase, mitochondrial	1.10587	0.0368859	0.0102312	53	0
Q9BVG4	PBDC1	Protein PBDC1	1.1055	0.0316169	0.000292937	33	38
Q12769	NUP160	Nuclear pore complex protein Nup160	1.1054	0.0224485	7.85987e-05	53	0
P37198	NUP62	Nuclear pore glycoprotein p62	1.10539	0.0388852	0.0140789	52	2
O95793	STAU1	Double-stranded RNA-binding protein Staufen homolog 1	1.10535	0.0381778	0.00702018	44	17
O75063	FAM20B	Glycosaminoglycan xylosylkinase	1.10514	0.0397063	2.12427e-05	14	74
Q9NPF4	OSGEP	Probable tRNA N6-adenosine threonylcarbamoyltransferase	1.10484	0.0286733	0.000309525	40	25
Q9NR28	DIABLO	Diablo homolog, mitochondrial	1.10454	0.0263922	0.000613572	53	0
P35475	IDUA	Alpha-L-iduronidase	1.10453	0.0695608	0.0170239	17	68
O75153	CLUH	Clustered mitochondria protein homolog	1.10442	0.0434378	0.0176043	44	17
P54886	ALDH18A1	Delta-1-pyrroline-5-carboxylate synthase	1.10423	0.026817	0.000752594	53	0
Q92523	CPT1B	Carnitine O-palmitoyltransferase 1, muscle isoform	1.10392	0.0606768	0.00563236	16	70
Q9NSY0	NRBP2	Nuclear receptor-binding protein 2	1.10387	0.0870041	0.00186678	6	89
O14880	MGST3	Microsomal glutathione S-transferase 3	1.10383	0.0543866	0.0814709	53	0
O60664	PLIN3	Perilipin-3	1.10332	0.0369766	0.0122308	53	0
Q9NQP4	PFDN4	Prefoldin subunit 4	1.10332	0.0488261	0.000159436	12	77
Q9BTE6	AARSD1	Alanyl-tRNA editing protein Aarsd1	1.10313	0.0393306	7.69518e-06	12	77
Q6P179	ERAP2	Endoplasmic reticulum aminopeptidase 2	1.10312	0.0728627	0.075663	28	47
Q86WV6	STING1	Stimulator of interferon genes protein	1.10305	0.0392691	0.0124448	47	11
Q9BSD7	NTPCR	Cancer-related nucleoside-triphosphatase	1.10294	0.0460038	0.0422617	53	0
P30626	SRI	Sorcin	1.10261	0.0311329	0.00359462	53	0
Q08211	DHX9	ATP-dependent RNA helicase A	1.10257	0.0160386	6.24941e-07	53	0
O43707	ACTN4	Alpha-actinin-4	1.10253	0.0335363	0.0065144	53	0
P25789	PSMA4	Proteasome subunit alpha type-4	1.10252	0.030563	0.00309283	53	0
Q14566	MCM6	DNA replication licensing factor MCM6	1.1025	0.0895586	0.01767	10	81
P07195	LDHB	L-lactate dehydrogenase B chain	1.1025	0.0397966	0.0202422	53	0
P53990	IST1	IST1 homolog	1.10247	0.033796	0.00434934	47	11
Q8TCF1	ZFAND1	AN1-type zinc finger protein 1	1.10233	0.0470291	0.00236486	21	60
P12111	COL6A3	Collagen alpha-3(VI) chain	1.10228	0.0589292	0.112256	53	0
P50991	CCT4	T-complex protein 1 subunit delta	1.10223	0.0240741	0.000279586	53	0
P07741	APRT	Adenine phosphoribosyltransferase	1.10201	0.0406327	0.0233867	53	0
Q9Y5Y2	NUBP2	Cytosolic Fe-S cluster assembly factor NUBP2	1.10193	0.0396905	0.00163089	27	49
Q14690	PDCD11	Protein RRP5 homolog	1.1018	0.0307995	0.00206033	47	11
P25787	PSMA2	Proteasome subunit alpha type-2	1.10153	0.0323275	0.00530109	53	0
Q9P000	COMMD9	COMM domain-containing protein 9	1.10133	0.0272363	0.000706904	48	9
P82933	MRPS9	28S ribosomal protein S9, mitochondrial	1.10108	0.0485204	0.00905233	27	49
P14866	HNRNPL	Heterogeneous nuclear ribonucleoprotein L	1.101	0.0242765	0.00035469	53	0
Q6XUX3	DSTYK	Dual serine/threonine and tyrosine protein kinase	1.10098	0.0619525	0.0144261	19	64
O15144	ARPC2	Actin-related protein 2/3 complex subunit 2	1.10091	0.0254144	0.000598132	53	0
O15269	SPTLC1	Serine palmitoyltransferase 1	1.10065	0.042156	3.96546e-07	7	87
Q15365	PCBP1	Poly(rC)-binding protein 1	1.1005	0.0386491	0.0190485	53	0
Q9H6K4	OPA3	Optic atrophy 3 protein	1.10047	0.0336228	0.00619857	50	6
P24539	ATP5PB	ATP synthase F(0) complex subunit B1, mitochondrial	1.1004	0.0373226	0.0155385	53	0
Q86U86	PBRM1	Protein polybromo-1	1.09983	0.0715981	0.000371343	6	89
Q9HBI0	PARVG	Gamma-parvin	1.09916	0.0721852	0.0421833	20	62
P49023	PXN	Paxillin	1.09905	0.0486898	0.00165654	17	68
Q96SI9	STRBP	Spermatid perinuclear RNA-binding protein	1.09894	0.0726103	0.00207024	8	85
Q99653	CHP1	Calcineurin B homologous protein 1	1.09892	0.0397026	0.0205937	50	6
P11177	PDHB	Pyruvate dehydrogenase E1 component subunit beta, mitochondrial	1.0989	0.0255314	0.000778039	53	0
O75663	TIPRL	TIP41-like protein	1.09878	0.0350221	1.43036e-05	15	72
Q14247	CTTN	Src substrate cortactin	1.09868	0.0417162	0.00830191	34	36
Q5SNT2	TMEM201	Transmembrane protein 201	1.09829	0.0373042	3.6885e-06	11	79
Q15233	NONO	Non-POU domain-containing octamer-binding protein	1.09827	0.0270615	0.00148936	53	0
P08865	RPSA	40S ribosomal protein SA	1.0981	0.0326711	0.00738847	53	0
P36776	LONP1	Lon protease homolog, mitochondrial	1.09781	0.0299709	0.00387332	53	0
Q99459	CDC5L	Cell division cycle 5-like protein	1.09778	0.0597614	0.0585603	33	38
P50213	IDH3A	Isocitrate dehydrogenase [NAD] subunit alpha, mitochondrial	1.09763	0.0325386	0.00742824	53	0
Q14692	BMS1	Ribosome biogenesis protein BMS1 homolog	1.09758	0.0335468	0.00129012	33	38
P00395	MT-CO1	Cytochrome c oxidase subunit 1	1.09737	0.0401856	0.0154826	43	19
Q9BSJ8	ESYT1	Extended synaptotagmin-1	1.09721	0.0292226	0.00330687	53	0
Q9UH03	SEPTIN3	Neuronal-specific septin-3	1.09719	0.0345523	0.00503079	42	21
Q15185	PTGES3	Prostaglandin E synthase 3	1.09717	0.0490174	0.0701252	53	0
Q8WUW1	BRK1	Protein BRICK1	1.09695	0.0593809	0.00251889	12	77
P40925	MDH1	Malate dehydrogenase, cytoplasmic	1.09689	0.0332325	0.00906872	53	0
Q9UBQ0	VPS29	Vacuolar protein sorting-associated protein 29	1.09671	0.0186371	2.00089e-05	53	0
P20700	LMNB1	Lamin-B1	1.09651	0.0360729	0.0159887	53	0
Q8WXH0	SYNE2	Nesprin-2	1.09645	0.0347626	0.0126788	53	0
P52292	KPNA2	Importin subunit alpha-1	1.09645	0.0606122	0.00588155	14	74
Q7Z3E5	ARMC9	LisH domain-containing protein ARMC9	1.09639	0.050913	0.0662661	47	11
O43670	ZNF207	BUB3-interacting and GLEBS motif-containing protein ZNF207	1.09638	0.0407947	0.00399465	28	47
Q9NX40	OCIAD1	OCIA domain-containing protein 1	1.09622	0.0423651	0.00890395	32	40
Q86YS7	C2CD5	C2 domain-containing protein 5	1.09593	0.0511876	6.90993e-06	6	89
Q2TAY7	SMU1	WD40 repeat-containing protein SMU1	1.09591	0.0284274	0.00292482	53	0
Q9BVK6	TMED9	Transmembrane emp24 domain-containing protein 9	1.09582	0.0251424	0.000926373	53	0
Q8TD19	NEK9	Serine/threonine-protein kinase Nek9	1.09559	0.0544813	0.000498424	10	81
Q92841	DDX17	Probable ATP-dependent RNA helicase DDX17	1.09522	0.0316097	0.00720175	53	0
P61923	COPZ1	Coatomer subunit zeta-1	1.09488	0.0385736	0.0259608	53	0
Q92947	GCDH	Glutaryl-CoA dehydrogenase, mitochondrial	1.09482	0.0271302	0.00213733	53	0
O14818	PSMA7	Proteasome subunit alpha type-7	1.09465	0.022432	0.000304915	53	0
Q9GZL7	WDR12	Ribosome biogenesis protein WDR12	1.09455	0.0396104	0.00186625	24	55
P0C0S5	H2AZ1	Histone H2A.Z	1.09445	0.0516693	0.0939344	53	0
Q9Y4W2	LAS1L	Ribosomal biogenesis protein LAS1L	1.09422	0.0449319	5.66888e-05	10	81
Q92900	UPF1	Regulator of nonsense transcripts 1	1.09416	0.0210504	0.000151972	53	0
Q5JPH6	EARS2	Probable glutamate--tRNA ligase, mitochondrial	1.09401	0.039013	0.00975228	37	30
P11117	ACP2	Lysosomal acid phosphatase	1.09342	0.035858	0.0176448	52	2
O95881	TXNDC12	Thioredoxin domain-containing protein 12	1.09332	0.0307803	0.00510106	49	8
Q9HC07	TMEM165	Transmembrane protein 165	1.09323	0.0415175	3.96878e-06	8	85
Q13825	AUH	Methylglutaconyl-CoA hydratase, mitochondrial	1.09312	0.0362306	0.00192003	28	47
Q8IW45	NAXD	ATP-dependent (S)-NAD(P)H-hydrate dehydratase	1.09309	0.0269111	0.00179741	50	6
Q86X83	COMMD2	COMM domain-containing protein 2	1.09295	0.0397581	0.00896048	34	36
P05067	APP	Amyloid-beta precursor protein	1.09279	0.0463317	0.00144095	16	70
Q8N8A2	ANKRD44	Serine/threonine-protein phosphatase 6 regulatory ankyrin repeat subunit B	1.0927	0.0371301	8.29158e-05	15	72
Q96DC8	ECHDC3	Enoyl-CoA hydratase domain-containing protein 3, mitochondrial	1.09235	0.0600193	0.00954663	15	72
O60678	PRMT3	Protein arginine N-methyltransferase 3	1.09225	0.0612266	0.000773531	8	85
O43299	AP5Z1	AP-5 complex subunit zeta-1	1.09225	0.0326117	0.000106333	20	62
Q96MW1	CCDC43	Coiled-coil domain-containing protein 43	1.09221	0.0642614	0.00513785	11	79
O14980	XPO1	Exportin-1	1.09189	0.0217318	0.000300332	53	0
P50552	VASP	Vasodilator-stimulated phosphoprotein	1.09188	0.0562594	0.000320443	8	85
P07814	EPRS1	Bifunctional glutamate/proline--tRNA ligase	1.0918	0.017862	2.39753e-05	53	0
Q92973	TNPO1	Transportin-1	1.0918	0.0229683	0.000563877	53	0
P49736	MCM2	DNA replication licensing factor MCM2	1.09169	0.0599011	0.0122884	16	70
O15270	SPTLC2	Serine palmitoyltransferase 2	1.09155	0.0530739	0.000603607	10	81
P06730	EIF4E	Eukaryotic translation initiation factor 4E	1.09138	0.0459746	0.0491686	45	15
Q8IZ07	ANKRD13A	Ankyrin repeat domain-containing protein 13A	1.0912	0.0674107	0.0139706	13	75
Q14839	CHD4	Chromodomain-helicase-DNA-binding protein 4	1.09119	0.0220199	0.000381066	53	0
P43155	CRAT	Carnitine O-acetyltransferase	1.09088	0.0475931	0.0124448	25	53
Q9NRY4	ARHGAP35	Rho GTPase-activating protein 35	1.09077	0.0535569	0.00118464	11	79
P49914	MTHFS	5-formyltetrahydrofolate cyclo-ligase	1.09068	0.0493209	0.0104375	22	58
P38919	EIF4A3	Eukaryotic initiation factor 4A-III	1.09068	0.0208122	0.000212567	53	0
Q9UHA4	LAMTOR3	Ragulator complex protein LAMTOR3	1.0906	0.0330823	0.00729673	44	17
Q92600	CNOT9	CCR4-NOT transcription complex subunit 9	1.09047	0.0367295	0.000303121	18	66
P52790	HK3	Hexokinase-3	1.09032	0.0831693	0.168877	28	47
Q9NYU2	UGGT1	UDP-glucose:glycoprotein glucosyltransferase 1	1.09012	0.0288739	0.00550544	53	0
O75352	MPDU1	Mannose-P-dolichol utilization defect 1 protein	1.09007	0.0394505	0.0377305	53	0
Q9UN37	VPS4A	Vacuolar protein sorting-associated protein 4A	1.08999	0.0482215	0.000250926	10	81
Q9NZD8	SPG21	Maspardin	1.08991	0.0406657	0.0213089	40	25
Q9UFN0	NIPSNAP3A	Protein NipSnap homolog 3A	1.08988	0.0294604	0.00654095	53	0
O00743	PPP6C	Serine/threonine-protein phosphatase 6 catalytic subunit	1.08977	0.0581996	0.00283579	11	79
P07954	FH	Fumarate hydratase, mitochondrial	1.08975	0.0358915	0.0235234	53	0
O75208	COQ9	Ubiquinone biosynthesis protein COQ9, mitochondrial	1.08953	0.0528414	0.0467606	32	40
Q86X55	CARM1	Histone-arginine methyltransferase CARM1	1.0895	0.0601333	0.000433132	7	87
Q99807	COQ7	5-demethoxyubiquinone hydroxylase, mitochondrial	1.0888	0.0524397	0.00119693	11	79
Q99943	AGPAT1	1-acyl-sn-glycerol-3-phosphate acyltransferase alpha	1.08867	0.0291483	0.00667567	53	0
Q96BI1	SLC22A18	Solute carrier family 22 member 18	1.08839	0.0619178	0.00738715	12	77
O43583	DENR	Density-regulated protein	1.08834	0.0539058	0.000599143	9	83
Q86UE4	MTDH	Protein LYRIC	1.08822	0.0443205	0.068266	53	0
Q29RF7	PDS5A	Sister chromatid cohesion protein PDS5 homolog A	1.08815	0.0358615	0.00383023	30	43
P57737	CORO7	Coronin-7	1.08792	0.0429929	0.0475067	47	11
Q8NI60	COQ8A	Atypical kinase COQ8A, mitochondrial	1.08791	0.0632267	0.00652025	11	79
Q9NXC5	MIOS	GATOR complex protein MIOS	1.08788	0.036148	0.00365414	29	45
Q8N122	RPTOR	Regulatory-associated protein of mTOR	1.08776	0.0279739	0.00094862	36	32
P03886	MT-ND1	NADH-ubiquinone oxidoreductase chain 1	1.08776	0.0775783	0.0056251	7	87
Q9BY50	SEC11C	Signal peptidase complex catalytic subunit SEC11C	1.08764	0.040188	0.000115836	12	77
P00813	ADA	Adenosine deaminase	1.08733	0.0948235	0.0312906	8	85
Q96C19	EFHD2	EF-hand domain-containing protein D2	1.08714	0.0717255	0.0031704	7	87
O75396	SEC22B	Vesicle-trafficking protein SEC22b	1.08703	0.0487605	0.100928	53	0
Q9Y2Z0	SUGT1	Protein SGT1 homolog	1.08677	0.0413544	0.0074549	26	51
Q5JTV8	TOR1AIP1	Torsin-1A-interacting protein 1	1.08656	0.0332997	0.0187861	53	0
P35754	GLRX	Glutaredoxin-1	1.08651	0.0927795	0.0955928	14	74
P46734	MAP2K3	Dual specificity mitogen-activated protein kinase kinase 3	1.08643	0.03858	4.59136e-06	8	85
Q14728	MFSD10	Major facilitator superfamily domain-containing protein 10	1.08642	0.0916875	0.0277054	8	85
Q6UVK1	CSPG4	Chondroitin sulfate proteoglycan 4	1.08618	0.0324308	0.016503	53	0
O95372	LYPLA2	Acyl-protein thioesterase 2	1.08614	0.0423299	0.0623794	53	0
P61088	UBE2N	Ubiquitin-conjugating enzyme E2 N	1.08608	0.0283913	0.00683638	53	0
Q6PKG0	LARP1	La-related protein 1	1.08598	0.0306815	0.00967693	50	6
Q6P1K8	GTF2H2C	General transcription factor IIH subunit 2-like protein	1.08562	0.0500932	0.00166967	12	77
P50570	DNM2	Dynamin-2	1.08557	0.0241701	0.00191431	53	0
Q9NVU7	SDAD1	Protein SDA1 homolog	1.08522	0.0666837	0.000975604	6	89
P15559	NQO1	NAD(P)H dehydrogenase [quinone] 1	1.08508	0.0594142	0.186454	53	0
Q9UI10	EIF2B4	Translation initiation factor eIF-2B subunit delta	1.08507	0.0448402	2.06621e-05	7	87
Q9BVC6	TMEM109	Transmembrane protein 109	1.08482	0.0367813	0.0357491	53	0
Q69YN4	VIRMA	Protein virilizer homolog	1.08481	0.0233206	0.000584173	44	17
Q9H0A0	NAT10	RNA cytidine acetyltransferase	1.0847	0.0354183	0.029785	53	0
Q96EB1	ELP4	Elongator complex protein 4	1.0846	0.0463562	0.000563266	11	79
Q15393	SF3B3	Splicing factor 3B subunit 3	1.08393	0.0172994	5.76211e-05	53	0
P57088	TMEM33	Transmembrane protein 33	1.08368	0.0448351	0.077696	50	6
Q9BRQ8	AIFM2	Ferroptosis suppressor protein 1	1.08368	0.108338	0.0364958	6	89
Q9H1E5	TMX4	Thioredoxin-related transmembrane protein 4	1.08349	0.0481967	0.0078573	18	66
O14656	TOR1A	Torsin-1A	1.08312	0.0366196	0.00128604	20	62
O15116	LSM1	U6 snRNA-associated Sm-like protein LSm1	1.08308	0.0314193	0.00727689	41	23
P28370	SMARCA1	Probable global transcription activator SNF2L1	1.08276	0.0462206	0.0106356	21	60
Q70CQ2	USP34	Ubiquitin carboxyl-terminal hydrolase 34	1.08275	0.0493367	0.000247127	8	85
Q5RKV6	EXOSC6	Exosome complex component MTR3	1.08217	0.0449408	0.000330255	10	81
Q7L523	RRAGA	Ras-related GTP-binding protein A	1.08208	0.0266822	0.00615608	53	0
P46063	RECQL	ATP-dependent DNA helicase Q1	1.08208	0.0363552	0.0342901	50	6
P20020	ATP2B1	Plasma membrane calcium-transporting ATPase 1	1.08204	0.071252	0.00491982	7	87
Q86VN1	VPS36	Vacuolar protein-sorting-associated protein 36	1.08199	0.0283248	0.00771977	50	6
Q9UKK9	NUDT5	ADP-sugar pyrophosphatase	1.08173	0.0265229	0.004868	50	6
Q969X1	TMBIM1	Protein lifeguard 3	1.0817	0.0497563	0.0823645	40	25
P28827	PTPRM	Receptor-type tyrosine-protein phosphatase mu	1.08163	0.0638446	0.0508735	19	64
Q9BW27	NUP85	Nuclear pore complex protein Nup85	1.08161	0.0305439	0.00864239	44	17
Q16630	CPSF6	Cleavage and polyadenylation specificity factor subunit 6	1.08158	0.0287432	0.0107905	53	0
Q99541	PLIN2	Perilipin-2	1.08147	0.060618	0.00236897	8	85
Q8N5C6	SRBD1	S1 RNA-binding domain-containing protein 1	1.08143	0.0451728	0.0176923	25	53
O00232	PSMD12	26S proteasome non-ATPase regulatory subunit 12	1.0814	0.0217999	0.00116866	53	0
Q96JJ3	ELMO2	Engulfment and cell motility protein 2	1.0811	0.0398421	0.0415392	44	17
Q06210	GFPT1	Glutamine--fructose-6-phosphate aminotransferase [isomerizing] 1	1.08101	0.0527169	0.155983	53	0
Q9Y5L4	TIMM13	Mitochondrial import inner membrane translocase subunit Tim13	1.08091	0.058987	0.0367748	19	64
Q9HBL7	PLGRKT	Plasminogen receptor (KT)	1.08038	0.0751107	0.0047835	6	89
Q92572	AP3S1	AP-3 complex subunit sigma-1	1.08035	0.0395383	0.00510343	22	58
Q9H583	HEATR1	HEAT repeat-containing protein 1	1.07997	0.0287988	0.0124861	53	0
Q6P1L8	MRPL14	39S ribosomal protein L14, mitochondrial	1.07996	0.0367767	3.01825e-06	7	87
Q86V88	MDP1	Magnesium-dependent phosphatase 1	1.07995	0.0438527	0.000582428	11	79
Q6IN85	PPP4R3A	Serine/threonine-protein phosphatase 4 regulatory subunit 3A	1.07991	0.0515698	0.0433684	26	51
P56381	ATP5F1E	ATP synthase subunit epsilon, mitochondrial	1.07988	0.0593981	0.01802	14	74
P06744	GPI	Glucose-6-phosphate isomerase	1.0798	0.0280854	0.0107236	53	0
Q8NFH4	NUP37	Nucleoporin Nup37	1.07979	0.0358604	0.0266433	44	17
Q6IAA8	LAMTOR1	Ragulator complex protein LAMTOR1	1.07971	0.0360011	0.0240471	42	21
Q9BTC8	MTA3	Metastasis-associated protein MTA3	1.07964	0.0651806	0.00153057	6	89
P30050	RPL12	60S ribosomal protein L12	1.07963	0.0269989	0.00831684	53	0
P48735	IDH2	Isocitrate dehydrogenase [NADP], mitochondrial	1.07951	0.0338982	0.0327261	53	0
Q9BT22	ALG1	Chitobiosyldiphosphodolichol beta-mannosyltransferase	1.07933	0.0424988	0.0859784	53	0
Q99698	LYST	Lysosomal-trafficking regulator	1.07924	0.0459235	0.0951552	48	9
P54725	RAD23A	UV excision repair protein RAD23 homolog A	1.07921	0.0207897	0.000968351	53	0
P31689	DNAJA1	DnaJ homolog subfamily A member 1	1.07917	0.0279304	0.0108909	53	0
O14776	TCERG1	Transcription elongation regulator 1	1.07879	0.0448066	0.00576263	17	68
Q8IXT5	RBM12B	RNA-binding protein 12B	1.07862	0.0408212	0.00758348	22	58
Q9BVJ7	DUSP23	Dual specificity protein phosphatase 23	1.07845	0.0456263	0.00543764	16	70
O15067	PFAS	Phosphoribosylformylglycinamidine synthase	1.07843	0.0246069	0.00471809	53	0
Q7L576	CYFIP1	Cytoplasmic FMR1-interacting protein 1	1.07835	0.0205894	0.000983239	53	0
P49915	GMPS	GMP synthase [glutamine-hydrolyzing]	1.07808	0.048016	0.100158	44	17
P53992	SEC24C	Protein transport protein Sec24C	1.07799	0.0288594	0.00800406	44	17
O15305	PMM2	Phosphomannomutase 2	1.07796	0.0500335	0.000576319	8	85
P55010	EIF5	Eukaryotic translation initiation factor 5	1.0779	0.0366046	0.0514533	53	0
P82673	MRPS35	28S ribosomal protein S35, mitochondrial	1.0777	0.0552848	0.00605568	11	79
Q9BTM9	URM1	Ubiquitin-related modifier 1	1.07763	0.070444	0.0498095	14	74
Q9H3H1	TRIT1	tRNA dimethylallyltransferase	1.07752	0.0831801	0.0496718	10	81
O95870	ABHD16A	Phosphatidylserine lipase ABHD16A	1.07678	0.0358304	0.0322782	44	17
Q8IY37	DHX37	Probable ATP-dependent RNA helicase DHX37	1.07678	0.0373305	0.000594353	14	74
P42704	LRPPRC	Leucine-rich PPR motif-containing protein, mitochondrial	1.07673	0.0307866	0.023766	53	0
Q9NX46	ADPRS	ADP-ribose glycohydrolase ARH3	1.07642	0.0334547	0.0371855	53	0
P13984	GTF2F2	General transcription factor IIF subunit 2	1.07641	0.0451439	0.000106333	7	87
O95674	CDS2	Phosphatidate cytidylyltransferase 2	1.07629	0.0461646	0.087486	42	21
O75170	PPP6R2	Serine/threonine-protein phosphatase 6 regulatory subunit 2	1.07629	0.0282704	0.00810204	44	17
O95716	RAB3D	Ras-related protein Rab-3D	1.07627	0.0455094	0.121846	53	0
Q8NCW5	NAXE	NAD(P)H-hydrate epimerase	1.07625	0.0419069	0.0937692	53	0
Q9H0W9	C11orf54	Ester hydrolase C11orf54	1.07624	0.0392753	0.0320452	36	32
P51688	SGSH	N-sulphoglucosamine sulphohydrolase	1.07613	0.0707864	0.319253	53	0
Q9UJU6	DBNL	Drebrin-like protein	1.07606	0.0238117	0.00465756	53	0
O95155	UBE4B	Ubiquitin conjugation factor E4 B	1.07601	0.0389285	0.0572666	47	11
P51610	HCFC1	Host cell factor 1	1.07598	0.0542352	0.0173816	15	72
Q96I15	SCLY	Selenocysteine lyase	1.07592	0.0350075	0.0339383	46	13
Q96PU5	NEDD4L	E3 ubiquitin-protein ligase NEDD4-like	1.07589	0.0353702	0.0496346	53	0
Q9BY77	POLDIP3	Polymerase delta-interacting protein 3	1.07583	0.036839	4.41355e-05	9	83
P07951	TPM2	Tropomyosin beta chain	1.07568	0.0725664	0.0367973	11	79
P14625	HSP90B1	Endoplasmin	1.07531	0.0241714	0.00564187	53	0
O60506	SYNCRIP	Heterogeneous nuclear ribonucleoprotein Q	1.07505	0.029811	0.0224712	53	0
Q9NVA2	SEPTIN11	Septin-11	1.07501	0.0310117	0.0238735	50	6
P12270	TPR	Nucleoprotein TPR	1.07491	0.0290635	0.0196903	53	0
Q9Y2T7	YBX2	Y-box-binding protein 2	1.0749	0.0465647	7.84287e-05	6	89
P11182	DBT	Lipoamide acyltransferase component of branched-chain alpha-keto acid dehydrogenase complex, mitochondrial	1.0746	0.03891	0.0273162	33	38
Q9BZE1	MRPL37	39S ribosomal protein L37, mitochondrial	1.0744	0.0489615	0.0552652	28	47
Q02809	PLOD1	Procollagen-lysine,2-oxoglutarate 5-dioxygenase 1	1.07434	0.0495661	0.0891263	35	34
P61009	SPCS3	Signal peptidase complex subunit 3	1.07404	0.0287741	0.0167771	50	6
Q9HAB8	PPCS	Phosphopantothenate--cysteine ligase	1.07401	0.0474982	0.0313863	23	57
Q9BSH4	TACO1	Translational activator of cytochrome c oxidase 1	1.07366	0.0742885	0.00841298	6	89
Q13905	RAPGEF1	Rap guanine nucleotide exchange factor 1	1.07358	0.049902	0.0625073	28	47
P35606	COPB2	Coatomer subunit beta~	1.07351	0.0175225	0.000368124	53	0
Q15813	TBCE	Tubulin-specific chaperone E	1.07342	0.0456095	0.136803	53	0
Q9P2T1	GMPR2	GMP reductase 2	1.07339	0.0427169	0.0527407	35	34
Q03135	CAV1	Caveolin-1	1.07333	0.0575806	0.0631971	21	60
Q15020	SART3	Squamous cell carcinoma antigen recognized by T-cells 3	1.07324	0.0395213	0.0401201	36	32
P61956	SUMO2	Small ubiquitin-related modifier 2	1.07322	0.0551158	0.000700914	6	89
P21953	BCKDHB	2-oxoisovalerate dehydrogenase subunit beta, mitochondrial	1.07313	0.0522309	0.014161	14	74
Q96CV9	OPTN	Optineurin	1.0728	0.0606209	0.0586198	18	66
Q86U42	PABPN1	Polyadenylate-binding protein 2	1.0728	0.0432112	0.0181065	22	58
P46060	RANGAP1	Ran GTPase-activating protein 1	1.07232	0.0215837	0.0032116	53	0
Q96A65	EXOC4	Exocyst complex component 4	1.07232	0.0192688	0.00116652	53	0
Q96QE2	SLC2A13	Proton myo-inositol cotransporter	1.07184	0.079386	0.221346	25	53
Q9UPN7	PPP6R1	Serine/threonine-protein phosphatase 6 regulatory subunit 1	1.07179	0.0625474	0.0170719	10	81
P34932	HSPA4	Heat shock 70 kDa protein 4	1.07179	0.0247174	0.00933622	53	0
P35221	CTNNA1	Catenin alpha-1	1.07159	0.0294129	0.027073	53	0
Q9NP66	HMG20A	High mobility group protein 20A	1.07155	0.0484123	0.0153495	16	70
P15374	UCHL3	Ubiquitin carboxyl-terminal hydrolase isozyme L3	1.07153	0.0666086	0.0894416	18	66
P49792	RANBP2	E3 SUMO-protein ligase RanBP2	1.07133	0.0176549	0.000563792	53	0
P84103	SRSF3	Serine/arginine-rich splicing factor 3	1.07116	0.0459	0.0997804	40	25
Q13131	PRKAA1	5~-AMP-activated protein kinase catalytic subunit alpha-1	1.07091	0.0272349	0.00754445	40	25
Q5T6J7	IDNK	Probable gluconokinase	1.07088	0.0561127	0.0166243	12	77
P49789	FHIT	Bis(5~-adenosyl)-triphosphatase	1.07086	0.0404815	0.0210117	25	53
Q15050	RRS1	Ribosome biogenesis regulatory protein homolog	1.07085	0.0666857	0.144118	24	55
O14972	VPS26C	Vacuolar protein sorting-associated protein 26C	1.07075	0.0358382	0.0213856	32	40
O43760	SYNGR2	Synaptogyrin-2	1.07071	0.0553833	0.0291479	15	72
Q9UIC8	LCMT1	Leucine carboxyl methyltransferase 1	1.07065	0.0506245	0.052336	23	57
Q969X5	ERGIC1	Endoplasmic reticulum-Golgi intermediate compartment protein 1	1.07019	0.0540124	0.00763628	10	81
P50336	PPOX	Protoporphyrinogen oxidase	1.07015	0.0374436	0.0591134	44	17
Q9HAV7	GRPEL1	GrpE protein homolog 1, mitochondrial	1.06998	0.0556514	0.0787677	23	57
O95182	NDUFA7	NADH dehydrogenase [ubiquinone] 1 alpha subcomplex subunit 7	1.06994	0.0739564	0.0186851	7	87
O60841	EIF5B	Eukaryotic translation initiation factor 5B	1.06958	0.0264939	0.0177016	53	0
Q14956	GPNMB	Transmembrane glycoprotein NMB	1.06955	0.0939975	0.493041	53	0
Q9ULD0	OGDHL	2-oxoglutarate dehydrogenase-like, mitochondrial	1.06948	0.128157	0.166709	7	87
Q8ND76	CCNY	Cyclin-Y	1.06918	0.0419724	0.0206012	22	58
P62330	ARF6	ADP-ribosylation factor 6	1.06917	0.023138	0.00769683	53	0
Q96T76	MMS19	MMS19 nucleotide excision repair protein homolog	1.06875	0.0227148	0.00709286	53	0
P61006	RAB8A	Ras-related protein Rab-8A	1.06845	0.0386306	0.0294155	29	45
P19404	NDUFV2	NADH dehydrogenase [ubiquinone] flavoprotein 2, mitochondrial	1.06844	0.0295412	0.0347227	53	0
Q9HAV0	GNB4	Guanine nucleotide-binding protein subunit beta-4	1.06842	0.0397814	0.0853625	45	15
Q9BX68	HINT2	Histidine triad nucleotide-binding protein 2, mitochondrial	1.06826	0.0491657	0.0734939	27	49
Q9UI26	IPO11	Importin-11	1.06825	0.0544361	0.00980821	10	81
Q8N6T3	ARFGAP1	ADP-ribosylation factor GTPase-activating protein 1	1.06823	0.0433359	0.0176186	19	64
Q8IWA0	WDR75	WD repeat-containing protein 75	1.0679	0.0463493	0.0301116	20	62
Q9UBF8	PI4KB	Phosphatidylinositol 4-kinase beta	1.06789	0.0268407	1.31471e-05	11	79
Q5SRE5	NUP188	Nucleoporin NUP188 homolog	1.06789	0.0316093	0.0185682	36	32
Q96NB2	SFXN2	Sideroflexin-2	1.06782	0.0392701	0.0252934	26	51
Q5VYK3	ECPAS	Proteasome adapter and scaffold protein ECM29	1.06772	0.0283356	0.0297781	53	0
Q96CM8	ACSF2	Medium-chain acyl-CoA ligase ACSF2, mitochondrial	1.06738	0.109614	0.2099	11	79
Q96A33	CCDC47	Coiled-coil domain-containing protein 47	1.06736	0.0358415	0.06652	47	11
Q96RS6	NUDCD1	NudC domain-containing protein 1	1.06714	0.0692329	0.322507	44	17
O43399	TPD52L2	Tumor protein D54	1.06709	0.0366285	0.0911377	53	0
Q99720	SIGMAR1	Sigma non-opioid intracellular receptor 1	1.06709	0.0378693	0.0735396	44	17
P13667	PDIA4	Protein disulfide-isomerase A4	1.06701	0.0309409	0.0475067	53	0
P07384	CAPN1	Calpain-1 catalytic subunit	1.06699	0.0217466	0.00628955	53	0
Q01844	EWSR1	RNA-binding protein EWS	1.06667	0.0529582	0.0262569	14	74
P15927	RPA2	Replication protein A 32 kDa subunit	1.06645	0.0520372	0.0156575	12	77
Q8WW22	DNAJA4	DnaJ homolog subfamily A member 4	1.06639	0.0405347	0.0464954	30	43
Q12907	LMAN2	Vesicular integral-membrane protein VIP36	1.06635	0.0288886	0.0362712	53	0
P04792	HSPB1	Heat shock protein beta-1	1.06631	0.0325179	0.0611119	53	0
P54136	RARS1	Arginine--tRNA ligase, cytoplasmic	1.06622	0.0144634	0.000155445	53	0
Q16543	CDC37	Hsp90 co-chaperone Cdc37	1.06611	0.0275661	0.0293257	53	0
P51532	SMARCA4	Transcription activator BRG1	1.06598	0.0572623	0.00277014	6	89
P56537	EIF6	Eukaryotic translation initiation factor 6	1.06584	0.0400179	0.127975	53	0
Q9P2D1	CHD7	Chromodomain-helicase-DNA-binding protein 7	1.06482	0.194488	0.312944	5	91
Q9Y678	COPG1	Coatomer subunit gamma-1	1.06474	0.0240817	0.0155546	53	0
P52907	CAPZA1	F-actin-capping protein subunit alpha-1	1.06464	0.0275589	0.0327623	53	0
Q9NVH6	TMLHE	Trimethyllysine dioxygenase, mitochondrial	1.06455	0.0721647	0.0166601	6	89
Q86Y82	STX12	Syntaxin-12	1.06446	0.0348791	0.0795456	50	6
Q86UT6	NLRX1	NLR family member X1	1.06444	0.0682884	0.16432	21	60
Q7Z569	BRAP	BRCA1-associated protein	1.06429	0.0508106	0.00419915	8	85
Q16719	KYNU	Kynureninase	1.0641	0.0656192	0.289599	39	26
A6NHR9	SMCHD1	Structural maintenance of chromosomes flexible hinge domain-containing protein 1	1.06327	0.0411214	0.0146731	17	68
Q9NTG7	SIRT3	NAD-dependent protein deacetylase sirtuin-3, mitochondrial	1.06233	0.0520474	0.159079	33	38
Q9H7B4	SMYD3	Histone-lysine N-methyltransferase SMYD3	1.062	0.0456602	0.0024141	8	85
O75494	SRSF10	Serine/arginine-rich splicing factor 10	1.06178	0.0634266	0.121832	18	66
Q96EY8	MMAB	Corrinoid adenosyltransferase	1.0617	0.0393362	0.000141952	6	89
Q9UBU9	NXF1	Nuclear RNA export factor 1	1.06158	0.041861	0.0415852	23	57
Q8WV93	AFG1L	AFG1-like ATPase	1.06158	0.0519699	0.00693645	8	85
P12109	COL6A1	Collagen alpha-1(VI) chain	1.0615	0.0763231	0.453185	53	0
P05455	SSB	Lupus La protein	1.06149	0.0234661	0.0182094	53	0
O43818	RRP9	U3 small nucleolar RNA-interacting protein 2	1.06146	0.046221	0.150386	39	26
Q8WVY7	UBLCP1	Ubiquitin-like domain-containing CTD phosphatase 1	1.06121	0.0387461	0.120475	47	11
Q14653	IRF3	Interferon regulatory factor 3	1.06117	0.0400731	0.000195209	6	89
Q15057	ACAP2	Arf-GAP with coiled-coil, ANK repeat and PH domain-containing protein 2	1.06107	0.0300672	7.61923e-05	9	83
Q8WXX0	DNAH7	Dynein heavy chain 7, axonemal	1.06078	0.0421766	0.000361678	6	89
Q9Y697	NFS1	Cysteine desulfurase, mitochondrial	1.06077	0.0483314	0.0484904	18	66
Q9Y4G8	RAPGEF2	Rap guanine nucleotide exchange factor 2	1.06069	0.0585846	0.0109232	7	87
P61221	ABCE1	ATP-binding cassette sub-family E member 1	1.06062	0.022198	0.0143292	53	0
Q9Y3C4	TPRKB	EKC/KEOPS complex subunit TPRKB	1.06028	0.0444365	0.162067	43	19
P14550	AKR1A1	Aldo-keto reductase family 1 member A1	1.06015	0.0382096	0.144452	53	0
O14678	ABCD4	Lysosomal cobalamin transporter ABCD4	1.06015	0.08662	0.192483	13	75
Q96EM0	L3HYPDH	Trans-3-hydroxy-L-proline dehydratase	1.06013	0.0382224	0.0906845	39	26
Q9Y277	VDAC3	Voltage-dependent anion-selective channel protein 3	1.0601	0.039516	0.158084	53	0
Q8NFD5	ARID1B	AT-rich interactive domain-containing protein 1B	1.05999	0.0583141	0.048082	12	77
Q9Y2Q5	LAMTOR2	Ragulator complex protein LAMTOR2	1.05961	0.0530791	0.0760324	18	66
Q96ME1	FBXL18	F-box/LRR-repeat protein 18	1.05951	0.03994	0.0353576	22	58
Q99798	ACO2	Aconitate hydratase, mitochondrial	1.05942	0.0273153	0.0468479	53	0
Q6NUQ4	TMEM214	Transmembrane protein 214	1.05933	0.0381413	0.00571427	13	75
Q9BUJ2	HNRNPUL1	Heterogeneous nuclear ribonucleoprotein U-like protein 1	1.05927	0.0429117	0.198788	53	0
Q9NP97	DYNLRB1	Dynein light chain roadblock-type 1	1.05925	0.0285685	0.0572205	53	0
Q9BQS8	FYCO1	FYVE and coiled-coil domain-containing protein 1	1.05919	0.0404249	0.00216962	9	83
P40818	USP8	Ubiquitin carboxyl-terminal hydrolase 8	1.05904	0.0239009	0.000228332	16	70
O14672	ADAM10	Disintegrin and metalloproteinase domain-containing protein 10	1.05895	0.0461148	0.0244986	14	74
Q99615	DNAJC7	DnaJ homolog subfamily C member 7	1.05893	0.0545032	0.00832457	7	87
Q9ULK4	MED23	Mediator of RNA polymerase II transcription subunit 23	1.05886	0.0520268	0.0444779	14	74
Q9BWJ5	SF3B5	Splicing factor 3B subunit 5	1.05858	0.036936	0.0391114	26	51
Q9UN86	G3BP2	Ras GTPase-activating protein-binding protein 2	1.05832	0.055051	0.0272643	10	81
Q8NHU6	TDRD7	Tudor domain-containing protein 7	1.05822	0.0429636	0.0540278	22	58
Q96SB4	SRPK1	SRSF protein kinase 1	1.05822	0.0569809	0.0121026	7	87
P35659	DEK	Protein DEK	1.05805	0.0367998	0.143652	53	0
Q9BZE9	ASPSCR1	Tether containing UBX domain for GLUT4	1.05793	0.0285595	0.0512338	48	9
Q53H96	PYCR3	Pyrroline-5-carboxylate reductase 3	1.05786	0.0353969	0.130073	53	0
Q8N442	GUF1	Translation factor GUF1, mitochondrial	1.05786	0.0569843	0.116577	19	64
P08621	SNRNP70	U1 small nuclear ribonucleoprotein 70 kDa	1.05784	0.0272482	0.0305863	42	21
Q8WWQ0	PHIP	PH-interacting protein	1.0577	0.0352864	0.00203329	11	79
Q9Y4E1	WASHC2C	WASH complex subunit 2C	1.0576	0.047542	0.10312	25	53
Q8N0X4	CLYBL	Citramalyl-CoA lyase, mitochondrial	1.05746	0.036499	0.144359	53	0
Q14764	MVP	Major vault protein	1.05744	0.0338424	0.116308	53	0
Q16186	ADRM1	Proteasomal ubiquitin receptor ADRM1	1.05742	0.0364067	0.143652	53	0
O43242	PSMD3	26S proteasome non-ATPase regulatory subunit 3	1.05707	0.0176864	0.0047835	53	0
Q92520	FAM3C	Protein FAM3C	1.05705	0.0249862	0.036093	52	2
O43314	PPIP5K2	Inositol hexakisphosphate and diphosphoinositol-pentakisphosphate kinase 2	1.05704	0.0402513	0.00440563	10	81
Q9Y2X3	NOP58	Nucleolar protein 58	1.05703	0.0419032	0.205082	53	0
Q9Y371	SH3GLB1	Endophilin-B1	1.05672	0.0282805	0.0423731	43	19
Q6PGP7	TTC37	Tetratricopeptide repeat protein 37	1.05666	0.032559	0.107696	53	0
P11233	RALA	Ras-related protein Ral-A	1.05662	0.0370708	0.0707328	32	40
Q8NEB9	PIK3C3	Phosphatidylinositol 3-kinase catalytic subunit type 3	1.05659	0.0453478	0.159702	36	32
Q8WTV0	SCARB1	Scavenger receptor class B member 1	1.05632	0.0717892	0.0795456	9	83
P20585	MSH3	DNA mismatch repair protein Msh3	1.05616	0.0630474	0.144611	17	68
Q13237	PRKG2	cGMP-dependent protein kinase 2	1.05608	0.0710405	0.335984	31	42
Q9UBM1	PEMT	Phosphatidylethanolamine N-methyltransferase	1.05602	0.0441672	0.00443232	8	85
Q16777	H2AC20	Histone H2A type 2-C	1.056	0.0757196	0.0449362	6	89
Q92925	SMARCD2	SWI/SNF-related matrix-associated actin-dependent regulator of chromatin subfamily D member 2	1.05592	0.0563833	0.0214866	8	85
Q969Y2	GTPBP3	tRNA modification GTPase GTPBP3, mitochondrial	1.05588	0.0302193	0.000436898	10	81
Q5HYK3	COQ5	2-methoxy-6-polyprenyl-1,4-benzoquinol methylase, mitochondrial	1.05579	0.0493502	0.277521	50	6
Q92621	NUP205	Nuclear pore complex protein Nup205	1.05576	0.0229066	0.0277342	53	0
Q6FI81	CIAPIN1	Anamorsin	1.05575	0.0450454	0.234663	50	6
O14647	CHD2	Chromodomain-helicase-DNA-binding protein 2	1.05573	0.0368298	0.00714834	13	75
Q86Y79	PTRH1	Probable peptidyl-tRNA hydrolase	1.05562	0.0315539	0.0565807	38	28
Q13148	TARDBP	TAR DNA-binding protein 43	1.05559	0.0252466	0.0446489	53	0
P16403	H1-2	Histone H1.2	1.05546	0.0683251	0.0290602	6	89
O00186	STXBP3	Syntaxin-binding protein 3	1.05536	0.0274428	0.0641454	53	0
O75643	SNRNP200	U5 small nuclear ribonucleoprotein 200 kDa helicase	1.05522	0.0141805	0.00104073	53	0
Q99584	S100A13	Protein S100-A13	1.05513	0.0571776	0.36811	53	0
Q7Z4Q2	HEATR3	HEAT repeat-containing protein 3	1.05509	0.0445306	0.0523407	18	66
Q9NZL9	MAT2B	Methionine adenosyltransferase 2 subunit beta	1.05505	0.0265406	0.051024	50	6
P42566	EPS15	Epidermal growth factor receptor substrate 15	1.05476	0.0285004	0.0196635	29	45
Q9HCL2	GPAM	Glycerol-3-phosphate acyltransferase 1, mitochondrial	1.05463	0.0426243	0.143652	35	34
Q8N6M0	OTUD6B	Deubiquitinase OTUD6B	1.05461	0.0939171	0.109996	6	89
P53621	COPA	Coatomer subunit alpha	1.05461	0.01717	0.00545834	53	0
P33316	DUT	Deoxyuridine 5~-triphosphate nucleotidohydrolase, mitochondrial	1.05449	0.0333328	0.112088	48	9
Q8TAT6	NPLOC4	Nuclear protein localization protein 4 homolog	1.05438	0.044675	0.146115	32	40
Q9UJS0	SLC25A13	Calcium-binding mitochondrial carrier protein Aralar2	1.05436	0.0295258	0.0896328	53	0
O75436	VPS26A	Vacuolar protein sorting-associated protein 26A	1.05428	0.0296775	0.0917097	53	0
Q9NRN7	AASDHPPT	L-aminoadipate-semialdehyde dehydrogenase-phosphopantetheinyl transferase	1.05418	0.0350505	0.0100643	15	72
Q9HC38	GLOD4	Glyoxalase domain-containing protein 4	1.05408	0.0248803	0.0474251	53	0
P62312	LSM6	U6 snRNA-associated Sm-like protein LSm6	1.054	0.0673951	0.0891263	10	81
O96019	ACTL6A	Actin-like protein 6A	1.05385	0.0450177	0.159238	33	38
Q9NVH1	DNAJC11	DnaJ homolog subfamily C member 11	1.05356	0.0228746	0.0337879	53	0
O95571	ETHE1	Persulfide dioxygenase ETHE1, mitochondrial	1.0535	0.0303423	0.084643	47	11
Q8IUX7	AEBP1	Adipocyte enhancer-binding protein 1	1.05339	0.0541201	0.27035	37	30
Q13485	SMAD4	Mothers against decapentaplegic homolog 4	1.05312	0.0391961	0.127975	36	32
Q7KZF4	SND1	Staphylococcal nuclease domain-containing protein 1	1.0526	0.0183699	0.0111944	53	0
Q63HN8	RNF213	E3 ubiquitin-protein ligase RNF213	1.0524	0.0326954	0.13754	53	0
Q6JQN1	ACAD10	Acyl-CoA dehydrogenase family member 10	1.05226	0.0558348	0.104266	15	72
Q5JU69	TOR2A	Torsin-2A	1.05216	0.0677563	0.0690058	8	85
P15170	GSPT1	Eukaryotic peptide chain release factor GTP-binding subunit ERF3A	1.05193	0.0268474	0.0755124	53	0
P22314	UBA1	Ubiquitin-like modifier-activating enzyme 1	1.05182	0.0254364	0.062089	53	0
O60783	MRPS14	28S ribosomal protein S14, mitochondrial	1.05128	0.0510647	0.0632434	13	75
Q9NR50	EIF2B3	Translation initiation factor eIF-2B subunit gamma	1.05116	0.0874147	0.108065	6	89
Q86W92	PPFIBP1	Liprin-beta-1	1.05062	0.0497271	0.0423951	11	79
P55209	NAP1L1	Nucleosome assembly protein 1-like 1	1.05058	0.033662	0.16289	53	0
Q9Y3L3	SH3BP1	SH3 domain-binding protein 1	1.05046	0.0443717	0.238493	43	19
O43181	NDUFS4	NADH dehydrogenase [ubiquinone] iron-sulfur protein 4, mitochondrial	1.05037	0.0463883	0.0538325	14	74
Q7RTV0	PHF5A	PHD finger-like domain-containing protein 5A	1.05014	0.0442529	0.014668	9	83
Q9Y4Z0	LSM4	U6 snRNA-associated Sm-like protein LSm4	1.04966	0.0392122	0.119616	30	43
Q6P996	PDXDC1	Pyridoxal-dependent decarboxylase domain-containing protein 1	1.04956	0.0355145	0.141688	41	23
Q9NP81	SARS2	Serine--tRNA ligase, mitochondrial	1.04954	0.030658	0.13472	53	0
P62318	SNRPD3	Small nuclear ribonucleoprotein Sm D3	1.04947	0.0340668	0.176894	53	0
Q9NT62	ATG3	Ubiquitin-like-conjugating enzyme ATG3	1.04933	0.0328996	0.0982277	37	30
Q9Y243	AKT3	RAC-gamma serine/threonine-protein kinase	1.04931	0.0578962	0.0342364	7	87
O14976	GAK	Cyclin-G-associated kinase	1.04923	0.0300991	0.108782	47	11
Q9UJY5	GGA1	ADP-ribosylation factor-binding protein GGA1	1.04911	0.0365478	0.184601	47	11
Q9H553	ALG2	Alpha-1,3/1,6-mannosyltransferase ALG2	1.04907	0.0446894	0.0235234	10	81
Q15717	ELAVL1	ELAV-like protein 1	1.04892	0.0407341	0.262205	53	0
O60925	PFDN1	Prefoldin subunit 1	1.04872	0.0369515	0.077973	25	53
P51858	HDGF	Hepatoma-derived growth factor	1.04859	0.0316382	0.154199	53	0
P56556	NDUFA6	NADH dehydrogenase [ubiquinone] 1 alpha subcomplex subunit 6	1.04842	0.0673986	0.236311	17	68
Q9UNP9	PPIE	Peptidyl-prolyl cis-trans isomerase E	1.04833	0.049239	0.119613	18	66
P49750	YLPM1	YLP motif-containing protein 1	1.04821	0.0720882	0.0688041	6	89
Q9H0U6	MRPL18	39S ribosomal protein L18, mitochondrial	1.04817	0.037118	0.0541967	20	62
Q96I25	RBM17	Splicing factor 45	1.04814	0.050771	0.0283672	8	85
Q7Z478	DHX29	ATP-dependent RNA helicase DHX29	1.04796	0.0470971	0.0427682	11	79
Q06787	FMR1	Synaptic functional regulator FMR1	1.0479	0.0397084	0.0987473	24	55
Q92696	RABGGTA	Geranylgeranyl transferase type-2 subunit alpha	1.04763	0.0383041	0.0829839	23	57
Q9UMR2	DDX19B	ATP-dependent RNA helicase DDX19B	1.04702	0.0382102	0.105268	26	51
Q9HAU5	UPF2	Regulator of nonsense transcripts 2	1.04697	0.0294476	0.0361552	25	53
Q5JPE7	NOMO2	Nodal modulator 2	1.04672	0.0286213	0.109765	47	11
P04440	HLA-DPB1	HLA class II histocompatibility antigen, DP beta 1 chain	1.0466	0.0718165	0.419484	30	43
O75935	DCTN3	Dynactin subunit 3	1.04657	0.0338562	0.187994	50	6
Q9NR56	MBNL1	Muscleblind-like protein 1	1.04655	0.0463899	0.0213924	8	85
P08240	SRPRA	Signal recognition particle receptor subunit alpha	1.0465	0.0380244	0.21604	45	15
Q9BQA1	WDR77	Methylosome protein 50	1.04641	0.0310508	0.125206	43	19
Q9UIV1	CNOT7	CCR4-NOT transcription complex subunit 7	1.04624	0.0442899	0.0550422	13	75
Q01433	AMPD2	AMP deaminase 2	1.04624	0.0430118	0.0489522	13	75
O96008	TOMM40	Mitochondrial import receptor subunit TOM40 homolog	1.0462	0.0353843	0.223389	53	0
Q6ZNJ1	NBEAL2	Neurobeachin-like protein 2	1.04609	0.0521932	0.191995	21	60
P41091	EIF2S3	Eukaryotic translation initiation factor 2 subunit 3	1.04586	0.0479595	0.0126177	6	89
Q9UBQ7	GRHPR	Glyoxylate reductase/hydroxypyruvate reductase	1.04571	0.028336	0.135793	53	0
Q9BVI4	NOC4L	Nucleolar complex protein 4 homolog	1.04561	0.0283528	0.0593041	32	40
Q13155	AIMP2	Aminoacyl tRNA synthase complex-interacting multifunctional protein 2	1.0456	0.0586969	0.402832	40	25
Q9UNH7	SNX6	Sorting nexin-6	1.04552	0.0194722	0.0354009	53	0
Q8WW59	SPRYD4	SPRY domain-containing protein 4	1.04551	0.0338142	0.170122	44	17
P61106	RAB14	Ras-related protein Rab-14	1.04472	0.0189035	0.0336974	53	0
Q9NSD9	FARSB	Phenylalanine--tRNA ligase beta subunit	1.04469	0.0182882	0.0289372	53	0
Q7KZI7	MARK2	Serine/threonine-protein kinase MARK2	1.04464	0.0448182	0.152018	22	58
Q8NDA8	MROH1	Maestro heat-like repeat-containing protein family member 1	1.04446	0.0325371	0.203381	53	0
Q9C0E2	XPO4	Exportin-4	1.04384	0.0443161	0.355084	53	0
Q92616	GCN1	eIF-2-alpha kinase activator GCN1	1.04381	0.0194458	0.0422714	53	0
Q9NV31	IMP3	U3 small nucleolar ribonucleoprotein protein IMP3	1.04369	0.0343567	0.0323802	15	72
P09874	PARP1	Poly [ADP-ribose] polymerase 1	1.04358	0.0298118	0.174675	53	0
Q8N4Q0	ZADH2	Prostaglandin reductase 3	1.04351	0.111772	0.317049	7	87
Q15063	POSTN	Periostin	1.04334	0.0686576	0.554021	53	0
O75923	DYSF	Dysferlin	1.04272	0.0719566	0.312847	16	70
Q9H479	FN3K	Fructosamine-3-kinase	1.04267	0.0433491	0.328515	47	11
Q53H12	AGK	Acylglycerol kinase, mitochondrial	1.04266	0.0319324	0.213474	53	0
P30622	CLIP1	CAP-Gly domain-containing linker protein 1	1.04258	0.0390291	0.223529	37	30
Q13617	CUL2	Cullin-2	1.04247	0.0237672	0.100836	53	0
Q15459	SF3A1	Splicing factor 3A subunit 1	1.04217	0.028191	0.16563	53	0
Q9NV70	EXOC1	Exocyst complex component 1	1.04209	0.0340128	0.234663	50	6
Q96P70	IPO9	Importin-9	1.04175	0.0268402	0.150119	53	0
Q12792	TWF1	Twinfilin-1	1.04173	0.0236139	0.104628	53	0
Q8TED0	UTP15	U3 small nucleolar RNA-associated protein 15 homolog	1.04169	0.0543345	0.255312	21	60
Q14137	BOP1	Ribosome biogenesis protein BOP1	1.04155	0.0606131	0.271896	18	66
Q8TET4	GANC	Neutral alpha-glucosidase C	1.04135	0.0525484	0.196664	17	68
Q9Y5X3	SNX5	Sorting nexin-5	1.04118	0.0207444	0.0708852	53	0
P06746	POLB	DNA polymerase beta	1.04096	0.0456262	0.214295	24	55
P13804	ETFA	Electron transfer flavoprotein subunit alpha, mitochondrial	1.04094	0.0273436	0.165531	53	0
P63279	UBE2I	SUMO-conjugating enzyme UBC9	1.04094	0.0407203	0.255074	36	32
O75380	NDUFS6	NADH dehydrogenase [ubiquinone] iron-sulfur protein 6, mitochondrial	1.04074	0.0422399	0.224381	29	45
P36551	CPOX	Oxygen-dependent coproporphyrinogen-III oxidase, mitochondrial	1.04073	0.0542082	0.077973	8	85
Q16891	IMMT	MICOS complex subunit MIC60	1.04063	0.0278788	0.176438	53	0
Q9NR30	DDX21	Nucleolar RNA helicase 2	1.04053	0.0536827	0.452785	47	11
Q13045	FLII	Protein flightless-1 homolog	1.04047	0.0244311	0.127319	53	0
Q16740	CLPP	ATP-dependent Clp protease proteolytic subunit, mitochondrial	1.04041	0.0417437	0.207113	27	49
Q8IUR0	TRAPPC5	Trafficking protein particle complex subunit 5	1.04011	0.0494252	0.35693	36	32
O43633	CHMP2A	Charged multivesicular body protein 2a	1.03982	0.0602549	0.0741934	6	89
Q9P0J0	NDUFA13	NADH dehydrogenase [ubiquinone] 1 alpha subcomplex subunit 13	1.03979	0.0291105	0.203923	53	0
P63000	RAC1	Ras-related C3 botulinum toxin substrate 1	1.03941	0.0324494	0.257269	53	0
Q9BQ75	CMSS1	Protein CMSS1	1.03936	0.0366204	0.00713306	6	89
Q9Y3I0	RTCB	RNA-splicing ligase RtcB homolog	1.03924	0.0169173	0.0386755	53	0
P36542	ATP5F1C	ATP synthase subunit gamma, mitochondrial	1.0392	0.0280119	0.194157	53	0
Q8TAE8	GADD45GIP1	Growth arrest and DNA damage-inducible proteins-interacting protein 1	1.03884	0.0345966	0.117735	23	57
Q14694	USP10	Ubiquitin carboxyl-terminal hydrolase 10	1.03883	0.0319899	0.118448	27	49
Q92905	COPS5	COP9 signalosome complex subunit 5	1.03883	0.0286841	0.208266	53	0
Q9P2E9	RRBP1	Ribosome-binding protein 1	1.03877	0.0309445	0.242824	53	0
Q6XQN6	NAPRT	Nicotinate phosphoribosyltransferase	1.0386	0.0486062	0.456669	53	0
Q3LXA3	TKFC	Triokinase/FMN cyclase	1.03856	0.02464	0.148718	53	0
Q05048	CSTF1	Cleavage stimulation factor subunit 1	1.03836	0.0468341	0.100426	11	79
Q96K76	USP47	Ubiquitin carboxyl-terminal hydrolase 47	1.03812	0.0242584	0.147311	53	0
Q9HA65	TBC1D17	TBC1 domain family member 17	1.03781	0.0681353	0.359314	17	68
Q96S52	PIGS	GPI transamidase component PIG-S	1.03766	0.0538804	0.499545	50	6
Q56VL3	OCIAD2	OCIA domain-containing protein 2	1.03763	0.0554811	0.303068	20	62
Q9BX79	STRA6	Receptor for retinol uptake STRA6	1.03755	0.0596833	0.440537	31	42
Q9Y3C6	PPIL1	Peptidyl-prolyl cis-trans isomerase-like 1	1.03726	0.037284	0.251891	35	34
O75334	PPFIA2	Liprin-alpha-2	1.03712	0.034331	0.0667919	15	72
Q12982	BNIP2	BCL2/adenovirus E1B 19 kDa protein-interacting protein 2	1.03696	0.0471689	0.100089	10	81
O15488	GYG2	Glycogenin-2	1.03695	0.0400723	0.388458	53	0
Q9NUB1	ACSS1	Acetyl-coenzyme A synthetase 2-like, mitochondrial	1.03687	0.0559163	0.263358	16	70
Q53GL7	PARP10	Protein mono-ADP-ribosyltransferase PARP10	1.03683	0.0663307	0.345242	16	70
Q9Y2W1	THRAP3	Thyroid hormone receptor-associated protein 3	1.0368	0.0525226	0.475985	45	15
Q96J01	THOC3	THO complex subunit 3	1.03644	0.0559568	0.146017	9	83
P34949	MPI	Mannose-6-phosphate isomerase	1.03624	0.0361325	0.348594	53	0
Q08623	PUDP	Pseudouridine-5~-phosphatase	1.03622	0.0590043	0.552901	50	6
Q9BRG1	VPS25	Vacuolar protein-sorting-associated protein 25	1.03602	0.0204485	0.108033	53	0
P12814	ACTN1	Alpha-actinin-1	1.03596	0.025671	0.194782	53	0
O14950	MYL12B	Myosin regulatory light chain 12B	1.03553	0.0351687	0.345412	53	0
Q9NQE9	HINT3	Histidine triad nucleotide-binding protein 3	1.03545	0.0600132	0.136277	7	87
Q93008	USP9X	Probable ubiquitin carboxyl-terminal hydrolase FAF-X	1.0352	0.021164	0.128072	53	0
Q96D15	RCN3	Reticulocalbin-3	1.03498	0.0698641	0.407769	17	68
Q92785	DPF2	Zinc finger protein ubi-d4	1.0348	0.0572215	0.173338	9	83
P61163	ACTR1A	Alpha-centractin	1.0348	0.0289372	0.262896	53	0
P17661	DES	Desmin	1.03454	0.0734852	0.484122	21	60
Q9UHV9	PFDN2	Prefoldin subunit 2	1.03432	0.0228061	0.165915	53	0
Q16537	PPP2R5E	Serine/threonine-protein phosphatase 2A 56 kDa regulatory subunit epsilon isoform	1.0342	0.0597054	0.567482	47	11
Q8N1F7	NUP93	Nuclear pore complex protein Nup93	1.03417	0.0282053	0.259609	53	0
Q7L2E3	DHX30	ATP-dependent RNA helicase DHX30	1.03415	0.0273473	0.245567	53	0
Q86X76	NIT1	Deaminated glutathione amidase	1.03357	0.0272845	0.191271	40	25
Q96RL7	VPS13A	Vacuolar protein sorting-associated protein 13A	1.03352	0.044288	0.202679	16	70
O95487	SEC24B	Protein transport protein Sec24B	1.03346	0.0404362	0.410483	47	11
Q9GZY8	MFF	Mitochondrial fission factor	1.03342	0.0545789	0.513245	41	23
Q9NUY8	TBC1D23	TBC1 domain family member 23	1.033	0.0677102	0.214363	7	87
P19388	POLR2E	DNA-directed RNA polymerases I, II, and III subunit RPABC1	1.03287	0.0276792	0.264789	52	2
Q12797	ASPH	Aspartyl/asparaginyl beta-hydroxylase	1.03281	0.0257841	0.23757	53	0
P35250	RFC2	Replication factor C subunit 2	1.03263	0.0583561	0.311105	14	74
Q8N5M1	ATPAF2	ATP synthase mitochondrial F1 complex assembly factor 2	1.03235	0.0448969	0.378551	31	42
Q9HAV4	XPO5	Exportin-5	1.03229	0.0450069	0.395284	33	38
P61803	DAD1	Dolichyl-diphosphooligosaccharide--protein glycosyltransferase subunit DAD1	1.03209	0.036117	0.405811	53	0
Q96DH6	MSI2	RNA-binding protein Musashi homolog 2	1.03193	0.0229239	0.199018	53	0
O60493	SNX3	Sorting nexin-3	1.03184	0.0259005	0.222207	46	13
Q14204	DYNC1H1	Cytoplasmic dynein 1 heavy chain 1	1.03184	0.0228368	0.198788	53	0
Q2VIR3	EIF2S3B	Eukaryotic translation initiation factor 2 subunit 3B	1.03175	0.0262543	0.234082	47	11
Q9Y6W5	WASF2	Wiskott-Aldrich syndrome protein family member 2	1.03167	0.039773	0.29057	26	51
Q8IXI2	RHOT1	Mitochondrial Rho GTPase 1	1.03165	0.0210606	0.11269	39	26
O00483	NDUFA4	Cytochrome c oxidase subunit NDUFA4	1.03165	0.0510069	0.559541	53	0
Q96N67	DOCK7	Dedicator of cytokinesis protein 7	1.03156	0.019455	0.139546	53	0
Q15424	SAFB	Scaffold attachment factor B1	1.03146	0.0366335	0.408004	50	6
Q96JB5	CDK5RAP3	CDK5 regulatory subunit-associated protein 3	1.03135	0.0389672	0.451134	53	0
Q6P2Q9	PRPF8	Pre-mRNA-processing-splicing factor 8	1.03128	0.0202414	0.15763	53	0
O95299	NDUFA10	NADH dehydrogenase [ubiquinone] 1 alpha subcomplex subunit 10, mitochondrial	1.03116	0.0293342	0.322396	53	0
Q00341	HDLBP	Vigilin	1.03116	0.0236666	0.223463	53	0
P56377	AP1S2	AP-1 complex subunit sigma-2	1.03113	0.0306895	0.344585	53	0
O75521	ECI2	Enoyl-CoA delta isomerase 2	1.03106	0.0364709	0.425423	53	0
Q8IZ83	ALDH16A1	Aldehyde dehydrogenase family 16 member A1	1.03092	0.031216	0.355497	53	0
Q9NXA8	SIRT5	NAD-dependent protein deacylase sirtuin-5, mitochondrial	1.03071	0.0525045	0.143183	7	87
Q12904	AIMP1	Aminoacyl tRNA synthase complex-interacting multifunctional protein 1	1.03044	0.0226038	0.214295	53	0
Q9H0T7	RAB17	Ras-related protein Rab-17	1.03014	0.0677524	0.433696	15	72
Q15172	PPP2R5A	Serine/threonine-protein phosphatase 2A 56 kDa regulatory subunit alpha isoform	1.02983	0.0431624	0.4262	35	34
Q8N3P4	VPS8	Vacuolar protein sorting-associated protein 8 homolog	1.02978	0.0517883	0.122894	6	89
O15321	TM9SF1	Transmembrane 9 superfamily member 1	1.02974	0.0312328	0.0363849	8	85
Q9NP79	VTA1	Vacuolar protein sorting-associated protein VTA1 homolog	1.02963	0.0337429	0.246146	26	51
P17568	NDUFB7	NADH dehydrogenase [ubiquinone] 1 beta subcomplex subunit 7	1.02958	0.0532504	0.258902	11	79
Q8NE01	CNNM3	Metal transporter CNNM3	1.02936	0.0383409	0.225485	18	66
Q9BVJ6	UTP14A	U3 small nucleolar RNA-associated protein 14 homolog A	1.02913	0.0635896	0.244073	7	87
P35998	PSMC2	26S proteasome regulatory subunit 7	1.02908	0.01534	0.0917097	53	0
P27694	RPA1	Replication protein A 70 kDa DNA-binding subunit	1.02902	0.0260651	0.301783	53	0
Q9H7Z7	PTGES2	Prostaglandin E synthase 2	1.02891	0.0305415	0.363202	50	6
Q9BRT3	MIEN1	Migration and invasion enhancer 1	1.02868	0.0473341	0.107368	6	89
Q9P2I0	CPSF2	Cleavage and polyadenylation specificity factor subunit 2	1.02842	0.0408042	0.429472	36	32
P09211	GSTP1	Glutathione S-transferase P	1.02836	0.0709138	0.706392	53	0
P52630	STAT2	Signal transducer and activator of transcription 2	1.02835	0.0396989	0.491245	50	6
Q15102	PAFAH1B3	Platelet-activating factor acetylhydrolase IB subunit gamma	1.02831	0.0237445	0.269962	53	0
P31946	YWHAB	14-3-3 protein beta/alpha	1.02809	0.0401854	0.511767	53	0
P13796	LCP1	Plastin-2	1.02764	0.0687844	0.705443	53	0
Q9UG63	ABCF2	ATP-binding cassette sub-family F member 2	1.02764	0.0324284	0.330041	35	34
Q7L311	ARMCX2	Armadillo repeat-containing X-linked protein 2	1.02719	0.045594	0.164553	8	85
Q9P0K7	RAI14	Ankycorbin	1.02711	0.0334047	0.40583	44	17
P28331	NDUFS1	NADH-ubiquinone oxidoreductase 75 kDa subunit, mitochondrial	1.027	0.0275491	0.361818	53	0
O15131	KPNA5	Importin subunit alpha-6	1.02698	0.0445171	0.347042	19	64
Q969G3	SMARCE1	SWI/SNF-related matrix-associated actin-dependent regulator of chromatin subfamily E member 1	1.02658	0.0484805	0.405219	20	62
O43837	IDH3B	Isocitrate dehydrogenase [NAD] subunit beta, mitochondrial	1.02618	0.0326055	0.45295	53	0
P33176	KIF5B	Kinesin-1 heavy chain	1.026	0.01608	0.147048	53	0
Q14409	GK3P	Glycerol kinase 3	1.02596	0.0382751	0.307832	20	62
O43427	FIBP	Acidic fibroblast growth factor intracellular-binding protein	1.0259	0.0368161	0.146527	10	81
Q9H4A6	GOLPH3	Golgi phosphoprotein 3	1.02553	0.0353144	0.498605	53	0
Q5T2E6	ARMH3	Armadillo-like helical domain-containing protein 3	1.02542	0.0469174	0.599134	50	6
Q8TBF2	PRXL2B	Prostamide/prostaglandin F synthase	1.02536	0.0580499	0.578296	29	45
Q15691	MAPRE1	Microtubule-associated protein RP/EB family member 1	1.02525	0.0304303	0.438538	53	0
P22059	OSBP	Oxysterol-binding protein 1	1.02519	0.0209054	0.268082	53	0
Q9H7D7	WDR26	WD repeat-containing protein 26	1.02495	0.0293103	0.414038	50	6
Q96FJ2	DYNLL2	Dynein light chain 2, cytoplasmic	1.02469	0.0531709	0.541715	27	49
P62714	PPP2CB	Serine/threonine-protein phosphatase 2A catalytic subunit beta isoform	1.02462	0.0395111	0.194751	10	81
Q96KP4	CNDP2	Cytosolic non-specific dipeptidase	1.02462	0.033322	0.489997	53	0
P62979	RPS27A	Ubiquitin-40S ribosomal protein S27a	1.0245	0.0317341	0.470479	53	0
P21589	NT5E	5~-nucleotidase	1.0244	0.0742162	0.750167	50	6
P12694	BCKDHA	2-oxoisovalerate dehydrogenase subunit alpha, mitochondrial	1.02437	0.0437957	0.195822	8	85
P13073	COX4I1	Cytochrome c oxidase subunit 4 isoform 1, mitochondrial	1.02427	0.0342646	0.506926	53	0
P14314	PRKCSH	Glucosidase 2 subunit beta	1.02421	0.0296203	0.44573	53	0
O75146	HIP1R	Huntingtin-interacting protein 1-related protein	1.0241	0.0411673	0.277996	13	75
Q9HCS7	XAB2	Pre-mRNA-splicing factor SYF1	1.02407	0.0520351	0.347789	11	79
Q9Y6M1	IGF2BP2	Insulin-like growth factor 2 mRNA-binding protein 2	1.02401	0.0343609	0.500394	50	6
O14908	GIPC1	PDZ domain-containing protein GIPC1	1.02363	0.0424543	0.318601	14	74
P16615	ATP2A2	Sarcoplasmic/endoplasmic reticulum calcium ATPase 2	1.02343	0.0215652	0.317401	53	0
O96005	CLPTM1	Cleft lip and palate transmembrane protein 1	1.02289	0.0367802	0.559217	53	0
Q9BTV4	TMEM43	Transmembrane protein 43	1.02282	0.0256629	0.408773	53	0
P62191	PSMC1	26S proteasome regulatory subunit 4	1.0228	0.0171955	0.229791	53	0
O14618	CCS	Copper chaperone for superoxide dismutase	1.02264	0.0374984	0.567157	52	2
Q86TV6	TTC7B	Tetratricopeptide repeat protein 7B	1.02254	0.0365557	0.526139	44	17
Q9UQ90	SPG7	Paraplegin	1.02229	0.0350006	0.209144	11	79
Q9Y2D5	AKAP2	A-kinase anchor protein 2	1.0217	0.0598365	0.357999	7	87
Q9Y276	BCS1L	Mitochondrial chaperone BCS1	1.02126	0.0331024	0.54777	53	0
P09429	HMGB1	High mobility group protein B1	1.02105	0.0524397	0.705443	53	0
P30038	ALDH4A1	Delta-1-pyrroline-5-carboxylate dehydrogenase, mitochondrial	1.02103	0.0380567	0.602993	53	0
Q13867	BLMH	Bleomycin hydrolase	1.0208	0.0292092	0.494578	50	6
O60547	GMDS	GDP-mannose 4,6 dehydratase	1.02069	0.0366044	0.57711	48	9
Q14980	NUMA1	Nuclear mitotic apparatus protein 1	1.02067	0.0263561	0.465811	53	0
P11717	IGF2R	Cation-independent mannose-6-phosphate receptor	1.02064	0.0411639	0.636598	53	0
Q9UI30	TRMT112	Multifunctional methyltransferase subunit TRM112-like protein	1.02055	0.0370562	0.559528	42	21
P31153	MAT2A	S-adenosylmethionine synthase isoform type-2	1.02018	0.0298185	0.526878	53	0
P12955	PEPD	Xaa-Pro dipeptidase	1.02008	0.0334406	0.573239	53	0
Q99873	PRMT1	Protein arginine N-methyltransferase 1	1.02	0.0309754	0.546221	53	0
Q9Y3L5	RAP2C	Ras-related protein Rap-2c	1.01998	0.0511158	0.327101	7	87
Q13162	PRDX4	Peroxiredoxin-4	1.01986	0.0342521	0.571976	49	8
Q9NWW6	NMRK1	Nicotinamide riboside kinase 1	1.01957	0.0499961	0.463606	13	75
Q14974	KPNB1	Importin subunit beta-1	1.01955	0.0229161	0.430486	53	0
Q9HB07	MYG1	MYG1 exonuclease	1.01952	0.0203596	0.378972	53	0
P56192	MARS1	Methionine--tRNA ligase, cytoplasmic	1.01934	0.0228369	0.433794	53	0
Q92499	DDX1	ATP-dependent RNA helicase DDX1	1.01931	0.020056	0.377587	53	0
Q9NXR1	NDE1	Nuclear distribution protein nudE homolog 1	1.01899	0.0392731	0.237893	7	87
Q9H0E2	TOLLIP	Toll-interacting protein	1.01895	0.0253657	0.453226	45	15
Q8N6R0	EEF1AKNMT	eEF1A lysine and N-terminal methyltransferase	1.01874	0.0616782	0.468853	8	85
P14868	DARS1	Aspartate--tRNA ligase, cytoplasmic	1.01859	0.0255457	0.499	53	0
P40123	CAP2	Adenylyl cyclase-associated protein 2	1.01816	0.0470609	0.566957	21	60
O60306	AQR	RNA helicase aquarius	1.01786	0.0547697	0.683278	30	43
Q9Y5K8	ATP6V1D	V-type proton ATPase subunit D	1.01738	0.0299827	0.587355	53	0
Q8N3U4	STAG2	Cohesin subunit SA-2	1.01726	0.0274111	0.534226	47	11
O00159	MYO1C	Unconventional myosin-Ic	1.01718	0.0244359	0.514296	53	0
O60684	KPNA6	Importin subunit alpha-7	1.01712	0.0350883	0.372123	13	75
Q86U38	NOP9	Nucleolar protein 9	1.01686	0.0472375	0.611132	23	57
P04844	RPN2	Dolichyl-diphosphooligosaccharide--protein glycosyltransferase subunit 2	1.01606	0.025735	0.561651	53	0
P46108	CRK	Adapter molecule crk	1.01587	0.0396291	0.698264	50	6
Q09028	RBBP4	Histone-binding protein RBBP4	1.01575	0.0306037	0.60905	47	11
P24928	POLR2A	DNA-directed RNA polymerase II subunit RPB1	1.01563	0.0307569	0.633712	53	0
Q8IXI1	RHOT2	Mitochondrial Rho GTPase 2	1.01548	0.0207811	0.494272	53	0
Q9BX66	SORBS1	Sorbin and SH3 domain-containing protein 1	1.01542	0.0350206	0.679019	53	0
Q9H4I3	TRABD	TraB domain-containing protein	1.01517	0.0469139	0.572058	15	72
P05387	RPLP2	60S acidic ribosomal protein P2	1.01507	0.0493388	0.77487	53	0
Q16881	TXNRD1	Thioredoxin reductase 1, cytoplasmic	1.0146	0.0319513	0.668235	53	0
Q7L5D6	GET4	Golgi to ER traffic protein 4 homolog	1.0146	0.0385466	0.537663	17	68
P54578	USP14	Ubiquitin carboxyl-terminal hydrolase 14	1.01442	0.0209027	0.525906	53	0
Q7L0Y3	TRMT10C	tRNA methyltransferase 10 homolog C	1.01429	0.035676	0.639553	34	36
Q16513	PKN2	Serine/threonine-protein kinase N2	1.01397	0.046975	0.730981	35	34
Q14103	HNRNPD	Heterogeneous nuclear ribonucleoprotein D0	1.01361	0.0477433	0.789133	53	0
Q96DV4	MRPL38	39S ribosomal protein L38, mitochondrial	1.01353	0.0756806	0.744198	14	74
O94874	UFL1	E3 UFM1-protein ligase 1	1.01339	0.0250275	0.618134	53	0
P54577	YARS1	Tyrosine--tRNA ligase, cytoplasmic	1.01288	0.0325408	0.710502	53	0
Q92882	OSTF1	Osteoclast-stimulating factor 1	1.01233	0.0300789	0.693468	50	6
P52948	NUP98	Nuclear pore complex protein Nup98-Nup96	1.01215	0.0299533	0.696618	50	6
P55735	SEC13	Protein SEC13 homolog	1.01182	0.0219	0.611132	51	4
Q96PZ0	PUS7	Pseudouridylate synthase 7 homolog	1.01177	0.0661207	0.648913	7	87
P09669	COX6C	Cytochrome c oxidase subunit 6C	1.01174	0.0502695	0.810139	44	17
Q9UPU5	USP24	Ubiquitin carboxyl-terminal hydrolase 24	1.01166	0.0389242	0.766136	47	11
Q10567	AP1B1	AP-1 complex subunit beta-1	1.01163	0.0153654	0.498781	53	0
Q12979	ABR	Active breakpoint cluster region-related protein	1.0107	0.0304007	0.74264	53	0
P55265	ADAR	Double-stranded RNA-specific adenosine deaminase	1.01066	0.0283008	0.725121	53	0
Q8WWY3	PRPF31	U4/U6 small nuclear ribonucleoprotein Prp31	1.01009	0.0255466	0.705947	50	6
P47897	QARS1	Glutamine--tRNA ligase	1.00977	0.015934	0.581137	53	0
Q9HD20	ATP13A1	Manganese-transporting ATPase 13A1	1.00964	0.0275324	0.744687	53	0
Q02318	CYP27A1	Sterol 26-hydroxylase, mitochondrial	1.0095	0.0403149	0.820059	50	6
Q02790	FKBP4	Peptidyl-prolyl cis-trans isomerase FKBP4	1.00927	0.0287638	0.764792	53	0
P50579	METAP2	Methionine aminopeptidase 2	1.00886	0.0314803	0.780893	47	11
Q9Y3I1	FBXO7	F-box only protein 7	1.0085	0.0294545	0.776538	47	11
Q9UNN5	FAF1	FAS-associated factor 1	1.00843	0.0262587	0.71967	36	32
Q14257	RCN2	Reticulocalbin-2	1.00758	0.0482487	0.882341	53	0
P51812	RPS6KA3	Ribosomal protein S6 kinase alpha-3	1.00758	0.0306651	0.812754	50	6
Q9Y265	RUVBL1	RuvB-like 1	1.00734	0.024052	0.778566	53	0
P29350	PTPN6	Tyrosine-protein phosphatase non-receptor type 6	1.00733	0.0723064	0.916944	44	17
P16278	GLB1	Beta-galactosidase	1.00731	0.0299051	0.814756	50	6
O60832	DKC1	H/ACA ribonucleoprotein complex subunit DKC1	1.00705	0.0323571	0.839115	53	0
O00442	RTCA	RNA 3~-terminal phosphate cyclase	1.00688	0.026858	0.812461	53	0
Q9Y5S9	RBM8A	RNA-binding protein 8A	1.00664	0.0362282	0.863567	53	0
Q9BQ69	MACROD1	ADP-ribose glycohydrolase MACROD1	1.00661	0.0466802	0.893633	53	0
Q9UNS2	COPS3	COP9 signalosome complex subunit 3	1.00654	0.0243624	0.804328	53	0
O75348	ATP6V1G1	V-type proton ATPase subunit G 1	1.00616	0.0385616	0.877737	50	6
P54802	NAGLU	Alpha-N-acetylglucosaminidase	1.00589	0.0398298	0.88928	53	0
P42229	STAT5A	Signal transducer and activator of transcription 5A	1.00566	0.033012	0.860841	44	17
Q8IWA4	MFN1	Mitofusin-1	1.00527	0.0313379	0.850753	36	32
Q14232	EIF2B1	Translation initiation factor eIF-2B subunit alpha	1.00521	0.0331693	0.878916	49	8
Q14919	DRAP1	Dr1-associated corepressor	1.0052	0.0483695	0.901288	35	34
Q15843	NEDD8	NEDD8	1.005	0.0406159	0.885688	34	36
Q00577	PURA	Transcriptional activator protein Pur-alpha	1.00351	0.0323208	0.919393	53	0
O95831	AIFM1	Apoptosis-inducing factor 1, mitochondrial	1.00316	0.0293318	0.920097	53	0
P46776	RPL27A	60S ribosomal protein L27a	1.00309	0.0294212	0.922023	53	0
P24752	ACAT1	Acetyl-CoA acetyltransferase, mitochondrial	1.0024	0.0353081	0.949194	53	0
Q9BPX5	ARPC5L	Actin-related protein 2/3 complex subunit 5-like protein	1.00238	0.0242835	0.928	53	0
Q15019	SEPTIN2	Septin-2	1.00234	0.0295659	0.941509	53	0
P49591	SARS1	Serine--tRNA ligase, cytoplasmic	1.0019	0.0263909	0.946922	53	0
Q9BXJ9	NAA15	N-alpha-acetyltransferase 15, NatA auxiliary subunit	1.0017	0.0644793	0.980404	53	0
Q96TC7	RMDN3	Regulator of microtubule dynamics protein 3	1.00147	0.0279152	0.960911	53	0
P49903	SEPHS1	Selenide, water dikinase 1	1.00103	0.0218346	0.965713	53	0
O00410	IPO5	Importin-5	1.00069	0.0220265	0.977455	53	0
O95219	SNX4	Sorting nexin-4	1.00056	0.0313958	0.985559	45	15
P30740	SERPINB1	Leukocyte elastase inhibitor	1.00046	0.0610007	0.994082	53	0
A0A0B4J2D5	GATD3B	Glutamine amidotransferase-like class 1 domain-containing protein 3B, mitochondrial	1.00035	0.0426913	0.993971	53	0
Q9Y6D6	ARFGEF1	Brefeldin A-inhibited guanine nucleotide-exchange protein 1	0.999851	0.0447163	0.997042	44	17
Q96E11	MRRF	Ribosome-recycling factor, mitochondrial	0.999594	0.0555284	0.99367	37	30
Q9NS86	LANCL2	LanC-like protein 2	0.999251	0.0250712	0.978261	53	0
O00273	DFFA	DNA fragmentation factor subunit alpha	0.99921	0.0373019	0.982368	42	21
O75438	NDUFB1	NADH dehydrogenase [ubiquinone] 1 beta subcomplex subunit 1	0.999125	0.0510434	0.984201	35	34
Q9Y5L0	TNPO3	Transportin-3	0.998596	0.0321992	0.967444	53	0
O43615	TIMM44	Mitochondrial import inner membrane translocase subunit TIM44	0.998431	0.027015	0.957098	53	0
P61201	COPS2	COP9 signalosome complex subunit 2	0.998147	0.0239409	0.943208	53	0
Q02218	OGDH	2-oxoglutarate dehydrogenase, mitochondrial	0.997645	0.0320626	0.945377	53	0
Q969U7	PSMG2	Proteasome assembly chaperone 2	0.997567	0.0618809	0.933078	10	81
O00422	SAP18	Histone deacetylase complex subunit SAP18	0.997413	0.0509868	0.957546	43	19
Q9NXE4	SMPD4	Sphingomyelin phosphodiesterase 4	0.996919	0.0707465	0.955868	29	45
O95336	PGLS	6-phosphogluconolactonase	0.996912	0.0359256	0.935764	53	0
O43324	EEF1E1	Eukaryotic translation elongation factor 1 epsilon-1	0.996481	0.0338343	0.922023	53	0
Q14254	FLOT2	Flotillin-2	0.996469	0.0232024	0.887974	53	0
Q8WXF1	PSPC1	Paraspeckle component 1	0.996326	0.0299135	0.90868	53	0
P61081	UBE2M	NEDD8-conjugating enzyme Ubc12	0.996319	0.0338153	0.919065	53	0
Q99627	COPS8	COP9 signalosome complex subunit 8	0.995915	0.0318935	0.901485	50	6
Q96R05	RBP7	Retinoid-binding protein 7	0.995303	0.0809956	0.881318	7	87
P67870	CSNK2B	Casein kinase II subunit beta	0.995271	0.0274219	0.863403	46	13
P61619	SEC61A1	Protein transport protein Sec61 subunit alpha isoform 1	0.995254	0.0288753	0.878028	53	0
O60716	CTNND1	Catenin delta-1	0.994751	0.0224434	0.828967	53	0
Q9HDC9	APMAP	Adipocyte plasma membrane-associated protein	0.994651	0.0281817	0.859395	53	0
Q9P2X3	IMPACT	Protein IMPACT	0.994548	0.0352961	0.834974	25	53
P61758	VBP1	Prefoldin subunit 3	0.994149	0.041469	0.893633	53	0
Q9P0N9	TBC1D7	TBC1 domain family member 7	0.994053	0.0924042	0.844942	5	91
Q14966	ZNF638	Zinc finger protein 638	0.993691	0.0526433	0.814676	12	77
P06241	FYN	Tyrosine-protein kinase Fyn	0.993623	0.155345	0.870779	3	94
Q9Y530	OARD1	ADP-ribose glycohydrolase OARD1	0.993577	0.0631975	0.827064	10	81
Q12974	PTP4A2	Protein tyrosine phosphatase type IVA 2	0.993476	0.0485459	0.863759	29	45
P60033	CD81	CD81 antigen	0.99311	0.036598	0.859395	53	0
Q93034	CUL5	Cullin-5	0.993075	0.0178962	0.723629	53	0
Q01831	XPC	DNA repair protein complementing XP-C cells	0.992979	0.0583513	0.79706	10	81
O43488	AKR7A2	Aflatoxin B1 aldehyde reductase member 2	0.992866	0.0303728	0.825757	53	0
Q9BXK5	BCL2L13	Bcl-2-like protein 13	0.991869	0.0376265	0.838691	53	0
P20618	PSMB1	Proteasome subunit beta type-1	0.991504	0.0330166	0.800017	48	9
P60981	DSTN	Destrin	0.991405	0.0414232	0.844775	53	0
O75533	SF3B1	Splicing factor 3B subunit 1	0.990915	0.0180748	0.64367	53	0
P21281	ATP6V1B2	V-type proton ATPase subunit B, brain isoform	0.990884	0.0213038	0.69121	53	0
O95989	NUDT3	Diphosphoinositol polyphosphate phosphohydrolase 1	0.990854	0.050635	0.800769	24	55
Q13217	DNAJC3	DnaJ homolog subfamily C member 3	0.990618	0.0538114	0.856178	44	17
P35580	MYH10	Myosin-10	0.990404	0.0362931	0.803349	53	0
P84095	RHOG	Rho-related GTP-binding protein RhoG	0.990338	0.0345793	0.779904	47	11
P62304	SNRPE	Small nuclear ribonucleoprotein E	0.990319	0.0296326	0.758838	53	0
P82930	MRPS34	28S ribosomal protein S34, mitochondrial	0.99012	0.0905529	0.738561	5	91
P28289	TMOD1	Tropomodulin-1	0.990108	0.045107	0.804241	37	30
Q9UIA9	XPO7	Exportin-7	0.990077	0.028909	0.746593	53	0
Q9P2J5	LARS1	Leucine--tRNA ligase, cytoplasmic	0.989992	0.0207439	0.653626	53	0
Q9BT78	COPS4	COP9 signalosome complex subunit 4	0.989889	0.0257258	0.711803	53	0
Q8WVC6	DCAKD	Dephospho-CoA kinase domain-containing protein	0.98971	0.0268164	0.718064	53	0
O75367	MACROH2A1	Core histone macro-H2A.1	0.988915	0.0280593	0.709319	53	0
O00429	DNM1L	Dynamin-1-like protein	0.988534	0.0258362	0.676096	53	0
Q7Z6Z7	HUWE1	E3 ubiquitin-protein ligase HUWE1	0.987992	0.0223105	0.613931	53	0
O60763	USO1	General vesicular transport factor p115	0.98783	0.0186392	0.547001	53	0
O95573	ACSL3	Long-chain-fatty-acid--CoA ligase 3	0.987732	0.0239451	0.629839	53	0
Q15008	PSMD6	26S proteasome non-ATPase regulatory subunit 6	0.987669	0.0160786	0.485738	53	0
P17540	CKMT2	Creatine kinase S-type, mitochondrial	0.987557	0.0630089	0.850981	53	0
Q3YEC7	RABL6	Rab-like protein 6	0.987551	0.0269159	0.643076	47	11
Q13596	SNX1	Sorting nexin-1	0.987372	0.0279829	0.669314	53	0
P02786	TFRC	Transferrin receptor protein 1	0.987247	0.0511334	0.812461	53	0
P43007	SLC1A4	Neutral amino acid transporter A	0.987174	0.0477427	0.77962	44	17
Q8IWE2	FAM114A1	Protein NOXP20	0.987045	0.0462639	0.784055	50	6
P39687	ANP32A	Acidic leucine-rich nuclear phosphoprotein 32 family member A	0.986714	0.0446368	0.777645	53	0
Q9Y315	DERA	Deoxyribose-phosphate aldolase	0.986042	0.0273734	0.629003	53	0
Q6UW02	CYP20A1	Cytochrome P450 20A1	0.985863	0.021623	0.496331	42	21
Q96PP8	GBP5	Guanylate-binding protein 5	0.985673	0.0939825	0.803406	18	66
Q8TB37	NUBPL	Iron-sulfur protein NUBPL	0.985523	0.0293241	0.626207	49	8
Q13177	PAK2	Serine/threonine-protein kinase PAK 2	0.985474	0.0293297	0.628451	50	6
P26440	IVD	Isovaleryl-CoA dehydrogenase, mitochondrial	0.985245	0.0338138	0.677603	53	0
P61011	SRP54	Signal recognition particle 54 kDa protein	0.984758	0.0309186	0.638589	53	0
Q9BZF1	OSBPL8	Oxysterol-binding protein-related protein 8	0.98452	0.0360217	0.66661	48	9
P30044	PRDX5	Peroxiredoxin-5, mitochondrial	0.983906	0.0353032	0.663526	53	0
Q9Y6U3	SCIN	Adseverin	0.983733	0.0985621	0.852251	38	28
O76003	GLRX3	Glutaredoxin-3	0.983685	0.0423057	0.695539	47	11
P61158	ACTR3	Actin-related protein 3	0.983559	0.0261796	0.552633	53	0
Q5T653	MRPL2	39S ribosomal protein L2, mitochondrial	0.983251	0.0874085	0.554491	5	91
Q92783	STAM	Signal transducing adapter molecule 1	0.982829	0.0378852	0.664386	53	0
Q96QK1	VPS35	Vacuolar protein sorting-associated protein 35	0.982436	0.0225591	0.464297	53	0
Q7Z2W4	ZC3HAV1	Zinc finger CCCH-type antiviral protein 1	0.98238	0.037602	0.610459	41	23
Q14683	SMC1A	Structural maintenance of chromosomes protein 1A	0.982131	0.0206144	0.417525	53	0
P61513	RPL37A	60S ribosomal protein L37a	0.982114	0.135445	0.595984	3	94
Q8N1F8	STK11IP	Serine/threonine-protein kinase 11-interacting protein	0.982017	0.0441903	0.586418	27	49
Q86X10	RALGAPB	Ral GTPase-activating protein subunit beta	0.981992	0.0338198	0.589161	47	11
Q08378	GOLGA3	Golgin subfamily A member 3	0.981386	0.0303439	0.526878	45	15
Q9Y263	PLAA	Phospholipase A-2-activating protein	0.981337	0.0265653	0.505133	53	0
P07902	GALT	Galactose-1-phosphate uridylyltransferase	0.980803	0.0437932	0.571491	29	45
P00558	PGK1	Phosphoglycerate kinase 1	0.980246	0.0336896	0.574523	53	0
P42285	MTREX	Exosome RNA helicase MTR4	0.980222	0.0297535	0.50175	47	11
P17693	HLA-G	HLA class I histocompatibility antigen, alpha chain G	0.9802	0.124573	0.524598	3	94
O14662	STX16	Syntaxin-16	0.980165	0.0600924	0.614113	21	60
Q5H9R7	PPP6R3	Serine/threonine-protein phosphatase 6 regulatory subunit 3	0.97997	0.0408981	0.63759	53	0
O75563	SKAP2	Src kinase-associated phosphoprotein 2	0.979514	0.103514	0.493449	4	92
O14735	CDIPT	CDP-diacylglycerol--inositol 3-phosphatidyltransferase	0.979294	0.0385379	0.595284	50	6
Q8IZ52	CHPF	Chondroitin sulfate synthase 2	0.979241	0.096598	0.457519	4	92
P09001	MRPL3	39S ribosomal protein L3, mitochondrial	0.979077	0.033178	0.478647	38	28
Q9Y266	NUDC	Nuclear migration protein nudC	0.979025	0.0235317	0.399795	53	0
P17987	TCP1	T-complex protein 1 subunit alpha	0.97901	0.0231564	0.392363	53	0
A6NDG6	PGP	Glycerol-3-phosphate phosphatase	0.978894	0.0315631	0.51096	50	6
Q13620	CUL4B	Cullin-4B	0.978825	0.0378324	0.590549	53	0
Q9NQW7	XPNPEP1	Xaa-Pro aminopeptidase 1	0.97876	0.0260859	0.439358	53	0
Q96HE7	ERO1A	ERO1-like protein alpha	0.978443	0.0398392	0.602642	53	0
Q93050	ATP6V0A1	V-type proton ATPase 116 kDa subunit a1	0.978329	0.0305484	0.498563	53	0
P13987	CD59	CD59 glycoprotein	0.978147	0.0410673	0.608379	53	0
P49458	SRP9	Signal recognition particle 9 kDa protein	0.977778	0.0379309	0.573239	53	0
Q9H307	PNN	Pinin	0.977726	0.0345483	0.524944	50	6
P49711	CTCF	Transcriptional repressor CTCF	0.977444	0.0560831	0.264296	6	89
O75964	ATP5MG	ATP synthase subunit g, mitochondrial	0.977159	0.0324586	0.500296	53	0
Q15758	SLC1A5	Neutral amino acid transporter B(0)	0.976895	0.0875054	0.362271	4	92
Q86XP3	DDX42	ATP-dependent RNA helicase DDX42	0.976638	0.037655	0.551367	53	0
Q9NUQ8	ABCF3	ATP-binding cassette sub-family F member 3	0.97661	0.0364197	0.437172	33	38
O15355	PPM1G	Protein phosphatase 1G	0.976006	0.0567054	0.587355	30	43
Q9UL41	PNMA3	Paraneoplastic antigen Ma3	0.97578	0.0453591	0.606047	53	0
O75607	NPM3	Nucleoplasmin-3	0.975684	0.123834	0.430138	3	94
Q6YN16	HSDL2	Hydroxysteroid dehydrogenase-like protein 2	0.975576	0.0368837	0.524598	53	0
Q13232	NME3	Nucleoside diphosphate kinase 3	0.975539	0.0455128	0.551733	40	25
Q8NBN7	RDH13	Retinol dehydrogenase 13	0.975529	0.0429201	0.33969	17	68
Q9UNL2	SSR3	Translocon-associated protein subunit gamma	0.975228	0.084092	0.310244	4	92
Q9P016	THYN1	Thymocyte nuclear protein 1	0.975181	0.0343536	0.462028	47	11
P38117	ETFB	Electron transfer flavoprotein subunit beta	0.975169	0.0290876	0.414276	53	0
Q16851	UGP2	UTP--glucose-1-phosphate uridylyltransferase	0.975127	0.0271989	0.383155	53	0
Q9Y2D4	EXOC6B	Exocyst complex component 6B	0.974362	0.028696	0.393107	53	0
Q9Y2T2	AP3M1	AP-3 complex subunit mu-1	0.97435	0.0301999	0.402832	50	6
Q9Y2I1	NISCH	Nischarin	0.974346	0.0296034	0.311319	35	34
Q5T447	HECTD3	E3 ubiquitin-protein ligase HECTD3	0.97417	0.0269489	0.347042	50	6
O75351	VPS4B	Vacuolar protein sorting-associated protein 4B	0.973827	0.0304672	0.39719	50	6
Q14160	SCRIB	Protein scribble homolog	0.97355	0.0483802	0.596581	53	0
Q9H0R4	HDHD2	Haloacid dehalogenase-like hydrolase domain-containing protein 2	0.973195	0.0392978	0.498781	50	6
Q15149	PLEC	Plectin	0.973187	0.0222738	0.253983	53	0
Q12873	CHD3	Chromodomain-helicase-DNA-binding protein 3	0.973141	0.0843259	0.270695	4	92
P39210	MPV17	Protein Mpv17	0.973127	0.0424018	0.540984	53	0
O14521	SDHD	Succinate dehydrogenase [ubiquinone] cytochrome b small subunit, mitochondrial	0.972502	0.0807538	0.239686	4	92
P78344	EIF4G2	Eukaryotic translation initiation factor 4 gamma 2	0.972292	0.0332293	0.395305	47	11
P49753	ACOT2	Acyl-coenzyme A thioesterase 2, mitochondrial	0.972246	0.0779655	0.220237	4	92
P54619	PRKAG1	5~-AMP-activated protein kinase subunit gamma-1	0.971689	0.0247407	0.275016	53	0
P68402	PAFAH1B2	Platelet-activating factor acetylhydrolase IB subunit beta	0.971618	0.0381282	0.472804	53	0
Q7Z406	MYH14	Myosin-14	0.971528	0.0295519	0.355491	53	0
Q9NTI5	PDS5B	Sister chromatid cohesion protein PDS5 homolog B	0.97093	0.0223139	0.191271	47	11
Q02978	SLC25A11	Mitochondrial 2-oxoglutarate/malate carrier protein	0.970056	0.0283268	0.310976	53	0
P53004	BLVRA	Biliverdin reductase A	0.969779	0.0277101	0.295751	53	0
Q9Y3E7	CHMP3	Charged multivesicular body protein 3	0.969755	0.10177	0.23313	3	94
Q15637	SF1	Splicing factor 1	0.969626	0.0311858	0.348672	53	0
O43795	MYO1B	Unconventional myosin-Ib	0.969417	0.027903	0.29309	53	0
P08559	PDHA1	Pyruvate dehydrogenase E1 component subunit alpha, somatic form, mitochondrial	0.96938	0.0227149	0.199836	53	0
P12931	SRC	Proto-oncogene tyrosine-protein kinase Src	0.969065	0.0347057	0.346467	44	17
P49450	CENPA	Histone H3-like centromeric protein A	0.968814	0.0709051	0.132433	4	92
Q9Y251	HPSE	Heparanase	0.968659	0.106484	0.236238	3	94
P14317	HCLS1	Hematopoietic lineage cell-specific protein	0.968148	0.0938668	0.17519	3	94
P20340	RAB6A	Ras-related protein Rab-6A	0.967792	0.0222539	0.168963	53	0
Q8N668	COMMD1	COMM domain-containing protein 1	0.967751	0.0386921	0.354673	40	25
Q8N2H3	PYROXD2	Pyridine nucleotide-disulfide oxidoreductase domain-containing protein 2	0.967517	0.0770137	0.146017	4	92
P22061	PCMT1	Protein-L-isoaspartate(D-aspartate) O-methyltransferase	0.967353	0.0351753	0.355924	50	6
Q9BPX1	HSD17B14	17-beta-hydroxysteroid dehydrogenase 14	0.967158	0.0564676	0.0782395	5	91
Q92625	ANKS1A	Ankyrin repeat and SAM domain-containing protein 1A	0.967158	0.0349813	0.320313	44	17
O60271	SPAG9	C-Jun-amino-terminal kinase-interacting protein 4	0.96712	0.0262783	0.229712	53	0
Q53GS9	USP39	U4/U6.U5 tri-snRNP-associated protein 2	0.96695	0.0239834	0.188365	53	0
Q9NVJ2	ARL8B	ADP-ribosylation factor-like protein 8B	0.966322	0.0222228	0.135366	49	8
P63151	PPP2R2A	Serine/threonine-protein phosphatase 2A 55 kDa regulatory subunit B alpha isoform	0.966187	0.0344821	0.343497	53	0
Q6NVY1	HIBCH	3-hydroxyisobutyryl-CoA hydrolase, mitochondrial	0.965918	0.0320512	0.304829	53	0
O60610	DIAPH1	Protein diaphanous homolog 1	0.965824	0.0225873	0.149738	53	0
Q86WC4	OSTM1	Osteopetrosis-associated transmembrane protein 1	0.965686	0.0733174	0.107846	4	92
Q9Y6Y8	SEC23IP	SEC23-interacting protein	0.965382	0.0424805	0.401451	47	11
P35222	CTNNB1	Catenin beta-1	0.965217	0.037091	0.363202	53	0
Q9Y653	ADGRG1	Adhesion G-protein coupled receptor G1	0.965164	0.0708111	0.0919314	4	92
Q05639	EEF1A2	Elongation factor 1-alpha 2	0.965056	0.0913744	0.664065	39	26
P32189	GK	Glycerol kinase	0.964984	0.0833781	0.145179	4	92
Q9NU22	MDN1	Midasin	0.964771	0.0849639	0.0999164	3	94
O96000	NDUFB10	NADH dehydrogenase [ubiquinone] 1 beta subcomplex subunit 10	0.964672	0.0424459	0.391481	47	11
P61960	UFM1	Ubiquitin-fold modifier 1	0.964573	0.0382145	0.340542	47	11
O75503	CLN5	Ceroid-lipofuscinosis neuronal protein 5	0.964562	0.070485	0.120085	5	91
Q9NUI1	DECR2	Peroxisomal 2,4-dienoyl-CoA reductase	0.964292	0.0628988	0.0820834	5	91
Q9UGM6	WARS2	Tryptophan--tRNA ligase, mitochondrial	0.963927	0.0680848	0.0705229	4	92
Q16795	NDUFA9	NADH dehydrogenase [ubiquinone] 1 alpha subcomplex subunit 9, mitochondrial	0.963901	0.0341653	0.306524	53	0
Q8N3I7	BBS5	Bardet-Biedl syndrome 5 protein	0.963352	0.0588366	0.0581168	5	91
Q9Y296	TRAPPC4	Trafficking protein particle complex subunit 4	0.963111	0.0354402	0.228451	37	30
Q6UXN9	WDR82	WD repeat-containing protein 82	0.963078	0.0605684	0.197337	11	79
Q9Y2U8	LEMD3	Inner nuclear membrane protein Man1	0.963031	0.0821099	0.0747061	3	94
Q9NY93	DDX56	Probable ATP-dependent RNA helicase DDX56	0.963015	0.0807174	0.0701561	3	94
Q9BXF6	RAB11FIP5	Rab11 family-interacting protein 5	0.962985	0.0610972	0.0642284	5	91
Q8NBU5	ATAD1	ATPase family AAA domain-containing protein 1	0.962915	0.0430738	0.374225	47	11
O75844	ZMPSTE24	CAAX prenyl protease 1 homolog	0.962476	0.0293407	0.216354	53	0
Q8NBJ7	SUMF2	Inactive C-alpha-formylglycine-generating enzyme 2	0.962308	0.0407422	0.32411	44	17
Q5T4S7	UBR4	E3 ubiquitin-protein ligase UBR4	0.962067	0.0189754	0.0604425	53	0
Q8WVM8	SCFD1	Sec1 family domain-containing protein 1	0.961885	0.0249049	0.142461	53	0
Q9NXV6	CDKN2AIP	CDKN2A-interacting protein	0.961822	0.0489816	0.020855	5	91
P49327	FASN	Fatty acid synthase	0.961799	0.0234759	0.119911	53	0
Q9UGV2	NDRG3	Protein NDRG3	0.961678	0.0568254	0.0245638	4	92
P62993	GRB2	Growth factor receptor-bound protein 2	0.961676	0.0386799	0.317032	49	8
Q15126	PMVK	Phosphomevalonate kinase	0.961624	0.0304241	0.22202	53	0
Q2TAA2	IAH1	Isoamyl acetate-hydrolyzing esterase 1 homolog	0.961599	0.0583294	0.460202	40	25
Q9NZB8	MOCS1	Molybdenum cofactor biosynthesis protein 1	0.96141	0.0531566	0.0294088	5	91
P49321	NASP	Nuclear autoantigenic sperm protein	0.961278	0.0449473	0.373158	47	11
Q9Y291	MRPS33	28S ribosomal protein S33, mitochondrial	0.961164	0.0758947	0.0446489	3	94
Q16134	ETFDH	Electron transfer flavoprotein-ubiquinone oxidoreductase, mitochondrial	0.961133	0.0262789	0.154793	53	0
P26006	ITGA3	Integrin alpha-3	0.960811	0.0485041	0.430745	53	0
Q9NWB7	IFT57	Intraflagellar transport protein 57 homolog	0.960381	0.10885	0.199659	4	92
Q9Y490	TLN1	Talin-1	0.960355	0.017475	0.0349097	53	0
P09382	LGALS1	Galectin-1	0.960345	0.0475679	0.416134	53	0
Q6IBS0	TWF2	Twinfilin-2	0.960072	0.0302399	0.20091	53	0
Q86XA9	HEATR5A	HEAT repeat-containing protein 5A	0.959975	0.0480414	0.388675	47	11
Q9NNW7	TXNRD2	Thioredoxin reductase 2, mitochondrial	0.959939	0.0427188	0.311151	43	19
Q9ULT8	HECTD1	E3 ubiquitin-protein ligase HECTD1	0.959845	0.0540089	0.0140857	4	92
P62316	SNRPD2	Small nuclear ribonucleoprotein Sm D2	0.95983	0.0179393	0.0367456	53	0
Q9BXP5	SRRT	Serrate RNA effector molecule homolog	0.959721	0.0614174	0.521994	53	0
Q5VWZ2	LYPLAL1	Lysophospholipase-like protein 1	0.959717	0.0270672	0.136598	49	8
P60468	SEC61B	Protein transport protein Sec61 subunit beta	0.959146	0.0749378	0.0327281	3	94
Q96QR8	PURB	Transcriptional activator protein Pur-beta	0.95901	0.0322323	0.216597	53	0
Q96GM8	TOE1	Target of EGR1 protein 1	0.958827	0.101777	0.10312	3	94
Q8NFX7	STXBP6	Syntaxin-binding protein 6	0.95882	0.0623258	0.0433224	5	91
P78406	RAE1	mRNA export factor	0.9588	0.05516	0.0133726	4	92
P43353	ALDH3B1	Aldehyde dehydrogenase family 3 member B1	0.958699	0.0475843	0.0105899	5	91
O43920	NDUFS5	NADH dehydrogenase [ubiquinone] iron-sulfur protein 5	0.958643	0.0500158	0.391642	47	11
P46379	BAG6	Large proline-rich protein BAG6	0.958469	0.0306843	0.176895	50	6
Q8IWJ2	GCC2	GRIP and coiled-coil domain-containing protein 2	0.958008	0.0601011	0.0333317	5	91
O43390	HNRNPR	Heterogeneous nuclear ribonucleoprotein R	0.957874	0.0290163	0.159947	53	0
Q9NXH8	TOR4A	Torsin-4A	0.957818	0.069823	0.0191123	3	94
O00339	MATN2	Matrilin-2	0.957653	0.0777939	0.0323018	3	94
Q8WUM0	NUP133	Nuclear pore complex protein Nup133	0.957415	0.0226261	0.0724715	53	0
Q3T906	GNPTAB	N-acetylglucosamine-1-phosphotransferase subunits alpha/beta	0.957212	0.0683513	0.0155546	3	94
E9PRG8	C11orf98	Uncharacterized protein C11orf98	0.956588	0.047726	0.00348753	4	92
Q9H993	ARMT1	Damage-control phosphatase ARMT1	0.956496	0.0318775	0.172485	50	6
Q5RI15	COX20	Cytochrome c oxidase assembly protein COX20, mitochondrial	0.956426	0.0496544	0.00448047	4	92
Q14258	TRIM25	E3 ubiquitin/ISG15 ligase TRIM25	0.956005	0.0236041	0.0743117	53	0
P30043	BLVRB	Flavin reductase (NADPH)	0.955935	0.0325848	0.18845	53	0
P68400	CSNK2A1	Casein kinase II subunit alpha	0.955659	0.0330875	0.130686	39	26
Q9NXF1	TEX10	Testis-expressed protein 10	0.955475	0.0283851	0.129122	53	0
Q12996	CSTF3	Cleavage stimulation factor subunit 3	0.955434	0.0252087	0.0609107	43	19
Q3B8N2	LGALS9B	Galectin-9B	0.955267	0.0882387	0.0766179	4	92
Q8N1S5	SLC39A11	Zinc transporter ZIP11	0.955028	0.0654106	0.00840452	3	94
[truncated: 1,941 more rows]
