# Supplementary material for: Proteomics of Primary Uveal Melanoma: Insights into Metastasis and Protein Biomarkers
Source: Cancers (Basel). 2021 Jul 14;13(14):3520. doi: 10.3390/cancers13143520 (PMC8307952; doi:10.3390/cancers13143520)
Supplement: Supplementary file 1 [file cancers-13-03520-s001.zip › Table S5. Average Relative Protein Abundance, Non-Metastasizing pUM.xlsx]

## Sheet: Tables S5-Ave NonMetastasi n47 
Supplementary Table S5. Non-Metastasizing pUM, n=47 Average Relative Protein Abundance Total Proteins Quantified = 3935; Median Protein iTRAQ Ratio =0.953; Mean Protein iTRAQ Ratio = 0.925; Standard Deviation (SD) = 0.371 Yellow, ≥ 1SD from the mean; Orange, ≥ 2SD from the mean
UniProt Accession	Gene Name	Protein (Listed in Decreasing Abundance)	Linear Ratio NoMet pUM/Control	SEM1	Adjusted p-Value2	Sample Frequency	Imputation3 (%)
Proteins Significantly Elevated Relative to Normal Choroid4 (n=224)
P08758	ANXA5	Annexin A5	2.659	0.049078	8.07477e-24	47	0
P30536	TSPO	Translocator protein	2.33306	0.0510711	1.34494e-20	47	0
P31949	S100A11	Protein S100-A11	2.31908	0.0536957	1.23655e-19	47	0
P23297	S100A1	Protein S100-A1	2.29147	0.117002	3.4745e-09	43	9
P42766	RPL35	60S ribosomal protein L35	2.20838	0.048773	2.05993e-20	46	2
P78417	GSTO1	Glutathione S-transferase omega-1	2.18173	0.0465755	9.72005e-21	47	0
P14174	MIF	Macrophage migration inhibitory factor	2.12744	0.108565	1.64085e-08	47	0
P10599	TXN	Thioredoxin	2.02175	0.0491647	3.8029e-18	47	0
P61225	RAP2B	Ras-related protein Rap-2b	2.01032	0.0462154	5.19399e-19	47	0
P61604	HSPE1	10 kDa heat shock protein, mitochondrial	2.00482	0.0355646	2.2549e-23	47	0
P40429	RPL13A	60S ribosomal protein L13a	1.99014	0.039611	2.51302e-21	47	0
P83731	RPL24	60S ribosomal protein L24	1.97086	0.0573704	3.37756e-15	47	0
P30837	ALDH1B1	Aldehyde dehydrogenase X, mitochondrial	1.96737	0.0779627	5.27455e-11	47	0
P49207	RPL34	60S ribosomal protein L34	1.94295	0.0547966	3.21974e-16	43	9
P06748	NPM1	Nucleophosmin	1.93325	0.0408809	4.71032e-20	47	0
O95757	HSPA4L	Heat shock 70 kDa protein 4L	1.93019	0.0663241	3.74224e-13	44	6
P50914	RPL14	60S ribosomal protein L14	1.92845	0.0552062	2.79841e-15	47	0
O15400	STX7	Syntaxin-7	1.925	0.0632314	2.6748e-13	47	0
P62081	RPS7	40S ribosomal protein S7	1.9197	0.0422157	2.35666e-19	47	0
P62937	PPIA	Peptidyl-prolyl cis-trans isomerase A	1.91785	0.0270649	5.25303e-27	47	0
P62857	RPS28	40S ribosomal protein S28	1.90952	0.0420031	2.63742e-19	47	0
Q9BUP0	EFHD1	EF-hand domain-containing protein D1	1.89663	0.0675748	4.14161e-12	47	0
P62280	RPS11	40S ribosomal protein S11	1.88285	0.0464513	2.44104e-17	47	0
P22392	NME2	Nucleoside diphosphate kinase B	1.88195	0.0321531	5.27083e-24	44	6
P62899	RPL31	60S ribosomal protein L31	1.87885	0.0347673	5.16132e-22	47	0
Q02878	RPL6	60S ribosomal protein L6	1.87722	0.0425279	1.18495e-18	47	0
Q99643	SDHC	Succinate dehydrogenase cytochrome b560 subunit, mitochondrial	1.87345	0.054406	1.76061e-15	43	9
P62750	RPL23A	60S ribosomal protein L23a	1.85457	0.0494691	5.51041e-16	47	0
Q9Y3U8	RPL36	60S ribosomal protein L36	1.84991	0.063516	2.16604e-12	47	0
P00403	MT-CO2	Cytochrome c oxidase subunit 2	1.83754	0.0505605	1.94837e-15	47	0
P46778	RPL21	60S ribosomal protein L21	1.83223	0.0546318	3.07481e-14	47	0
P39019	RPS19	40S ribosomal protein S19	1.83017	0.0391184	2.47002e-19	47	0
P62266	RPS23	40S ribosomal protein S23	1.82741	0.0385462	1.57141e-19	47	0
P02545	LMNA	Prelamin-A/C	1.79366	0.0521462	2.15909e-14	47	0
P63241	EIF5A	Eukaryotic translation initiation factor 5A-1	1.78515	0.0322269	7.88409e-22	47	0
Q53EL6	PDCD4	Programmed cell death protein 4	1.76636	0.0519456	4.68193e-14	47	0
O75340	PDCD6	Programmed cell death protein 6	1.76434	0.0302987	1.60628e-22	47	0
Q96BY6	DOCK10	Dedicator of cytokinesis protein 10	1.75768	0.0838811	2.85261e-09	38	19
P36578	RPL4	60S ribosomal protein L4	1.74893	0.0375189	1.03176e-18	47	0
O75531	BANF1	Barrier-to-autointegration factor	1.74471	0.0743554	2.78767e-09	47	0
P18621	RPL17	60S ribosomal protein L17	1.73515	0.0390623	7.48693e-18	47	0
Q14376	GALE	UDP-glucose 4-epimerase	1.72426	0.0411876	7.82009e-17	47	0
P62851	RPS25	40S ribosomal protein S25	1.72065	0.0377739	3.94305e-18	47	0
Q99598	TSNAX	Translin-associated protein X	1.71886	0.0358804	6.47866e-19	47	0
P18124	RPL7	60S ribosomal protein L7	1.71189	0.042864	5.07746e-16	47	0
P61313	RPL15	60S ribosomal protein L15	1.70603	0.0423083	4.02718e-16	47	0
Q9BVP2	GNL3	Guanine nucleotide-binding protein-like 3	1.70257	0.047315	8.81488e-16	39	17
Q8NBS9	TXNDC5	Thioredoxin domain-containing protein 5	1.69753	0.0567276	6.89539e-12	47	0
Q13303	KCNAB2	Voltage-gated potassium channel subunit beta-2	1.69403	0.0694214	1.96434e-09	47	0
P62829	RPL23	60S ribosomal protein L23	1.68435	0.0350388	1.15255e-18	47	0
P46783	RPS10	40S ribosomal protein S10	1.68182	0.0423886	1.11596e-15	47	0
P26373	RPL13	60S ribosomal protein L13	1.67654	0.0364682	6.79012e-18	47	0
P05388	RPLP0	60S acidic ribosomal protein P0	1.6642	0.0323189	1.39606e-19	47	0
P23396	RPS3	40S ribosomal protein S3	1.66147	0.0441872	9.832e-15	47	0
Q8NC51	SERBP1	Plasminogen activator inhibitor 1 RNA-binding protein	1.65646	0.0916949	2.24794e-06	47	0
P55769	SNU13	NHP2-like protein 1	1.64693	0.0458851	6.25245e-14	47	0
P61353	RPL27	60S ribosomal protein L27	1.63973	0.0403724	1.20081e-15	47	0
P63173	RPL38	60S ribosomal protein L38	1.63288	0.0338206	3.94129e-19	42	11
Q16836	HADH	Hydroxyacyl-coenzyme A dehydrogenase, mitochondrial	1.63278	0.0471868	2.67322e-13	47	0
Q9H7B2	RPF2	Ribosome production factor 2 homolog	1.63015	0.0475126	2.77891e-14	40	15
Q86WA6	BPHL	Valacyclovir hydrolase	1.62756	0.0480134	5.7022e-13	47	0
P62913	RPL11	60S ribosomal protein L11	1.62347	0.037262	1.56878e-16	47	0
P62917	RPL8	60S ribosomal protein L8	1.61954	0.0456011	1.57136e-13	47	0
P62244	RPS15A	40S ribosomal protein S15a	1.61868	0.0267224	9.34397e-22	47	0
P05413	FABP3	Fatty acid-binding protein, heart	1.61249	0.0615495	1.14354e-09	47	0
P62910	RPL32	60S ribosomal protein L32	1.61239	0.0443914	8.90608e-14	47	0
P62847	RPS24	40S ribosomal protein S24	1.60768	0.0588456	3.16537e-10	46	2
P07737	PFN1	Profilin-1	1.6022	0.0262432	1.10645e-21	47	0
P62701	RPS4X	40S ribosomal protein S4, X isoform	1.60108	0.0401332	5.26908e-15	47	0
P62906	RPL10A	60S ribosomal protein L10a	1.59808	0.0352238	7.02556e-17	47	0
P16401	H1-5	Histone H1.5	1.5912	0.0677593	2.38432e-08	47	0
P62424	RPL7A	60S ribosomal protein L7a	1.58829	0.0328718	9.48565e-18	47	0
P52565	ARHGDIA	Rho GDP-dissociation inhibitor 1	1.58739	0.037971	1.54894e-15	47	0
P35232	PHB	Prohibitin	1.58624	0.0228738	1.25696e-23	47	0
Q15631	TSN	Translin	1.57956	0.0306872	1.2639e-18	47	0
P60228	EIF3E	Eukaryotic translation initiation factor 3 subunit E	1.57719	0.0241999	1.92069e-22	47	0
Q9H1A3	METTL9	Methyltransferase-like protein 9	1.57439	0.0504525	2.10252e-11	47	0
P62263	RPS14	40S ribosomal protein S14	1.57418	0.0378074	2.51565e-15	47	0
Q02543	RPL18A	60S ribosomal protein L18a	1.57146	0.0381037	3.71154e-15	47	0
Q9NR45	NANS	Sialic acid synthase	1.5644	0.035298	3.98754e-16	47	0
O00567	NOP56	Nucleolar protein 56	1.5639	0.0355374	5.15429e-16	47	0
P48426	PIP4K2A	Phosphatidylinositol 5-phosphate 4-kinase type-2 alpha	1.5616	0.0477548	7.20688e-12	47	0
P31939	ATIC	Bifunctional purine biosynthesis protein ATIC	1.55987	0.027272	4.75559e-20	47	0
Q01105	SET	Protein SET	1.5591	0.0285245	2.56964e-19	47	0
P30405	PPIF	Peptidyl-prolyl cis-trans isomerase F, mitochondrial	1.55816	0.0480583	1.01268e-11	47	0
Q96AG4	LRRC59	Leucine-rich repeat-containing protein 59	1.55756	0.0328035	4.32205e-17	47	0
P62277	RPS13	40S ribosomal protein S13	1.55626	0.0469127	5.36113e-12	47	0
P54652	HSPA2	Heat shock-related 70 kDa protein 2	1.555	0.0615231	8.22373e-09	47	0
P30046	DDT	D-dopachrome decarboxylase	1.55451	0.0401373	4.71029e-14	47	0
O75439	PMPCB	Mitochondrial-processing peptidase subunit beta	1.54996	0.0252443	4.58263e-21	47	0
P46779	RPL28	60S ribosomal protein L28	1.54599	0.0498584	4.86463e-11	47	0
P52597	HNRNPF	Heterogeneous nuclear ribonucleoprotein F	1.54574	0.0292005	1.27973e-18	47	0
P62854	RPS26	40S ribosomal protein S26	1.54401	0.0341583	3.71928e-16	47	0
O00303	EIF3F	Eukaryotic translation initiation factor 3 subunit F	1.5419	0.0299135	3.78926e-18	47	0
Q58FF6	HSP90AB4P	Putative heat shock protein HSP 90-beta 4	1.54164	0.0415085	2.54081e-13	47	0
P13639	EEF2	Elongation factor 2	1.54086	0.0261902	3.0944e-20	47	0
P19338	NCL	Nucleolin	1.54064	0.0351282	1.1428e-15	47	0
Q07021	C1QBP	Complement component 1 Q subcomponent-binding protein, mitochondrial	1.53634	0.041449	3.13574e-13	47	0
Q9UBR2	CTSZ	Cathepsin Z	1.53615	0.0713006	4.03073e-07	47	0
Q00796	SORD	Sorbitol dehydrogenase	1.53408	0.0413063	3.13635e-13	47	0
P60983	GMFB	Glia maturation factor beta	1.53345	0.038551	3.59382e-14	47	0
Q9BV36	MLPH	Melanophilin	1.53271	0.0628401	2.9699e-08	47	0
P32969	RPL9	60S ribosomal protein L9	1.53192	0.0305974	1.46161e-17	47	0
P09211	GSTP1	Glutathione S-transferase P	1.52891	0.0842147	1.03215e-05	47	0
P61970	NUTF2	Nuclear transport factor 2	1.52676	0.0417827	6.44091e-13	47	0
P22087	FBL	rRNA 2~-O-methyltransferase fibrillarin	1.52574	0.0372345	1.69803e-14	47	0
Q96I99	SUCLG2	Succinate--CoA ligase [GDP-forming] subunit beta, mitochondrial	1.51914	0.0369572	1.86874e-14	47	0
Q9Y262	EIF3L	Eukaryotic translation initiation factor 3 subunit L	1.51024	0.0290371	7.94401e-18	47	0
P10809	HSPD1	60 kDa heat shock protein, mitochondrial	1.50912	0.0359448	1.28184e-14	47	0
P36957	DLST	Dihydrolipoyllysine-residue succinyltransferase component of 2-oxoglutarate dehydrogenase complex, mitochondrial	1.50751	0.0421019	2.04905e-12	47	0
P24941	CDK2	Cyclin-dependent kinase 2	1.50716	0.0679797	3.86554e-07	47	0
Q96M27	PRRC1	Protein PRRC1	1.50534	0.0320439	1.10719e-16	44	6
Q9Y4W6	AFG3L2	AFG3-like protein 2	1.50499	0.0306957	7.90912e-17	47	0
A4D1P6	WDR91	WD repeat-containing protein 91	1.50413	0.037465	6.57031e-14	47	0
P62269	RPS18	40S ribosomal protein S18	1.50353	0.029257	1.54267e-17	47	0
O75368	SH3BGRL	SH3 domain-binding glutamic acid-rich-like protein	1.50324	0.0390312	2.52192e-13	47	0
Q9BYD3	MRPL4	39S ribosomal protein L4, mitochondrial	1.50168	0.0346165	1.2863e-15	43	9
P16219	ACADS	Short-chain specific acyl-CoA dehydrogenase, mitochondrial	1.49901	0.0373694	8.0176e-14	47	0
P60866	RPS20	40S ribosomal protein S20	1.49607	0.0437193	1.10432e-11	47	0
P62805	H4C1	Histone H4	1.4957	0.0463286	5.79358e-11	47	0
Q92820	GGH	Gamma-glutamyl hydrolase	1.49504	0.0745459	3.27964e-06	47	0
P62753	RPS6	40S ribosomal protein S6	1.49441	0.0480212	1.66294e-10	47	0
P61247	RPS3A	40S ribosomal protein S3a	1.4941	0.0404239	1.19278e-12	47	0
P63244	RACK1	Receptor of activated protein C kinase 1	1.49096	0.035191	1.74854e-14	47	0
Q6PI48	DARS2	Aspartate--tRNA ligase, mitochondrial	1.48676	0.0461772	8.07897e-11	47	0
Q9H299	SH3BGRL3	SH3 domain-binding glutamic acid-rich-like protein 3	1.4758	0.0759467	7.88489e-06	47	0
Q96I59	NARS2	Probable asparagine--tRNA ligase, mitochondrial	1.47406	0.0536879	7.13852e-09	47	0
O14556	GAPDHS	Glyceraldehyde-3-phosphate dehydrogenase, testis-specific	1.47306	0.0399958	2.58943e-12	47	0
P59998	ARPC4	Actin-related protein 2/3 complex subunit 4	1.47197	0.0256168	1.01312e-18	47	0
P98179	RBM3	RNA-binding protein 3	1.46974	0.0382325	6.44272e-14	40	15
P04792	HSPB1	Heat shock protein beta-1	1.46872	0.0466888	2.619e-10	47	0
P15880	RPS2	40S ribosomal protein S2	1.46689	0.0486998	8.59032e-10	47	0
P13797	PLS3	Plastin-3	1.46517	0.0394869	2.68133e-12	47	0
P27635	RPL10	60S ribosomal protein L10	1.46373	0.0332616	1.34956e-14	47	0
P51159	RAB27A	Ras-related protein Rab-27A	1.46213	0.0564979	3.87074e-08	47	0
P07093	SERPINE2	Glia-derived nexin	1.46056	0.0708005	3.79273e-06	47	0
P06865	HEXA	Beta-hexosaminidase subunit alpha	1.46018	0.0605549	1.90164e-07	47	0
Q13637	RAB32	Ras-related protein Rab-32	1.45948	0.0467464	4.19862e-10	47	0
P62249	RPS16	40S ribosomal protein S16	1.45907	0.0249581	9.46492e-19	47	0
P46926	GNPDA1	Glucosamine-6-phosphate isomerase 1	1.4569	0.0292068	2.76725e-16	47	0
P05387	RPLP2	60S acidic ribosomal protein P2	1.45679	0.0449358	1.66646e-10	47	0
P08708	RPS17	40S ribosomal protein S17	1.45575	0.047471	7.46681e-10	47	0
P10644	PRKAR1A	cAMP-dependent protein kinase type I-alpha regulatory subunit	1.4519	0.0449992	2.22166e-10	47	0
P68104	EEF1A1	Elongation factor 1-alpha 1	1.45096	0.0353994	2.18491e-13	47	0
E9PAV3	NACA	Nascent polypeptide-associated complex subunit alpha, muscle-specific form	1.45016	0.0394279	5.8808e-12	47	0
P11940	PABPC1	Polyadenylate-binding protein 1	1.44849	0.0281713	1.39634e-16	47	0
Q12905	ILF2	Interleukin enhancer-binding factor 2	1.44712	0.0229002	9.78639e-20	47	0
P40926	MDH2	Malate dehydrogenase, mitochondrial	1.44638	0.0294789	7.46833e-16	47	0
Q9Y3D6	FIS1	Mitochondrial fission 1 protein	1.44481	0.0491031	9.67895e-10	43	9
Q7L014	DDX46	Probable ATP-dependent RNA helicase DDX46	1.43888	0.0363938	1.0546e-12	47	0
P52788	SMS	Spermine synthase	1.43734	0.0411688	4.14189e-11	47	0
P49411	TUFM	Elongation factor Tu, mitochondrial	1.43731	0.0402859	2.25378e-11	47	0
P37108	SRP14	Signal recognition particle 14 kDa protein	1.43713	0.0398807	4.62211e-12	43	9
Q9BY32	ITPA	Inosine triphosphate pyrophosphatase	1.43675	0.0508841	1.03363e-08	47	0
Q562R1	ACTBL2	Beta-actin-like protein 2	1.43173	0.0481307	3.15124e-10	39	17
P60842	EIF4A1	Eukaryotic initiation factor 4A-I	1.42679	0.0277937	3.83057e-16	47	0
Q9NP58	ABCB6	ATP-binding cassette sub-family B member 6, mitochondrial	1.42515	0.0364068	2.06541e-13	40	15
P05386	RPLP1	60S acidic ribosomal protein P1	1.42398	0.0496636	1.05457e-08	47	0
Q9H6S3	EPS8L2	Epidermal growth factor receptor kinase substrate 8-like protein 2	1.4234	0.0653411	3.24173e-06	47	0
O76021	RSL1D1	Ribosomal L1 domain-containing protein 1	1.41979	0.0365143	3.54643e-12	47	0
Q5SY16	NOL9	Polynucleotide 5~-hydroxyl-kinase NOL9	1.41906	0.050692	3.12702e-09	40	15
P07686	HEXB	Beta-hexosaminidase subunit beta	1.41497	0.071113	1.77412e-05	47	0
Q9UQ80	PA2G4	Proliferation-associated protein 2G4	1.41459	0.0248513	1.89728e-17	47	0
P39023	RPL3	60S ribosomal protein L3	1.40863	0.0381228	2.46954e-11	47	0
P57729	RAB38	Ras-related protein Rab-38	1.40646	0.0672672	9.5614e-06	47	0
Q86UY8	NT5DC3	5~-nucleotidase domain-containing protein 3	1.40587	0.0342653	1.29766e-12	47	0
P84098	RPL19	60S ribosomal protein L19	1.40546	0.0472882	8.18221e-09	47	0
P13693	TPT1	Translationally-controlled tumor protein	1.40402	0.0310028	6.64794e-14	47	0
Q9P258	RCC2	Protein RCC2	1.40232	0.0405906	2.01747e-10	47	0
P06737	PYGL	Glycogen phosphorylase, liver form	1.40135	0.0721554	3.44744e-05	47	0
P07195	LDHB	L-lactate dehydrogenase B chain	1.39926	0.0310654	9.84403e-14	47	0
P23528	CFL1	Cofilin-1	1.39756	0.0236564	1.24962e-17	47	0
P35914	HMGCL	Hydroxymethylglutaryl-CoA lyase, mitochondrial	1.39646	0.0499152	1.62698e-08	43	9
Q9UH65	SWAP70	Switch-associated protein 70	1.39537	0.0279075	4.06976e-15	47	0
Q9Y3B8	REXO2	Oligoribonuclease, mitochondrial	1.39355	0.0383331	3.37921e-12	38	19
P43307	SSR1	Translocon-associated protein subunit alpha	1.39323	0.0484778	2.71321e-08	47	0
P57740	NUP107	Nuclear pore complex protein Nup107	1.39185	0.0310167	1.58688e-13	47	0
P54709	ATP1B3	Sodium/potassium-transporting ATPase subunit beta-3	1.39181	0.0405483	3.61875e-10	47	0
P46781	RPS9	40S ribosomal protein S9	1.39181	0.0474947	1.81994e-08	47	0
Q9NQR4	NIT2	Omega-amidase NIT2	1.38867	0.0312681	2.52381e-13	47	0
P62888	RPL30	60S ribosomal protein L30	1.38861	0.0336489	2.32357e-12	47	0
O75843	AP1G2	AP-1 complex subunit gamma-like 2	1.38624	0.0482817	1.25954e-08	43	9
P19623	SRM	Spermidine synthase	1.38612	0.0362486	1.76541e-11	46	2
P51991	HNRNPA3	Heterogeneous nuclear ribonucleoprotein A3	1.38541	0.0531468	2.90521e-07	47	0
Q7Z3B4	NUP54	Nucleoporin p54	1.38502	0.0373756	6.048e-12	40	15
P36959	GMPR	GMP reductase 1	1.3831	0.0592961	2.63137e-06	47	0
Q07020	RPL18	60S ribosomal protein L18	1.38296	0.0552108	6.92284e-07	47	0
Q13185	CBX3	Chromobox protein homolog 3	1.38154	0.0415964	4.02402e-10	43	9
Q08945	SSRP1	FACT complex subunit SSRP1	1.38146	0.02759	7.7632e-15	47	0
Q14669	TRIP12	E3 ubiquitin-protein ligase TRIP12	1.38023	0.0692983	1.90487e-05	43	9
Q53T59	HS1BP3	HCLS1-binding protein 3	1.3798	0.0364034	4.01934e-11	47	0
Q9BYT8	NLN	Neurolysin, mitochondrial	1.37949	0.0368115	5.55567e-11	47	0
P17096	HMGA1	High mobility group protein HMG-I/HMG-Y	1.37814	0.137431	0.0269797	47	0
P51149	RAB7A	Ras-related protein Rab-7a	1.3769	0.0274024	8.76057e-15	47	0
P58546	MTPN	Myotrophin	1.37621	0.0450882	1.22634e-08	47	0
P08670	VIM	Vimentin	1.37608	0.0817614	0.000384727	47	0
Q9GZS3	WDR61	WD repeat-containing protein 61	1.37586	0.0418052	1.98315e-09	47	0
P61586	RHOA	Transforming protein RhoA	1.37435	0.0331321	2.367e-13	39	17
O43598	DNPH1	2~-deoxynucleoside 5~-phosphate N-hydrolase 1	1.37434	0.0428494	4.00028e-09	47	0
P62826	RAN	GTP-binding nuclear protein Ran	1.37017	0.0238501	1.58239e-16	47	0
P51606	RENBP	N-acylglucosamine 2-epimerase	1.36784	0.0469961	4.95399e-08	47	0
Q14152	EIF3A	Eukaryotic translation initiation factor 3 subunit A	1.36553	0.0225298	3.23441e-17	47	0
P31040	SDHA	Succinate dehydrogenase [ubiquinone] flavoprotein subunit, mitochondrial	1.36486	0.0313252	1.45642e-12	47	0
Q9Y3D9	MRPS23	28S ribosomal protein S23, mitochondrial	1.36455	0.0318788	2.20457e-13	40	15
Q14165	MLEC	Malectin	1.36445	0.0304173	6.2369e-13	47	0
P53597	SUCLG1	Succinate--CoA ligase [ADP/GDP-forming] subunit alpha, mitochondrial	1.36421	0.0345148	2.53758e-11	47	0
P26599	PTBP1	Polypyrimidine tract-binding protein 1	1.36189	0.0320142	3.37728e-12	47	0
Q86V81	ALYREF	THO complex subunit 4	1.36081	0.0484444	1.38411e-07	47	0
O15488	GYG2	Glycogenin-2	1.35665	0.0339936	2.06382e-11	46	2
O43776	NARS1	Asparagine--tRNA ligase, cytoplasmic	1.35653	0.0293363	3.72904e-13	47	0
P49916	LIG3	DNA ligase 3	1.35513	0.0420005	3.37984e-09	44	6
P22626	HNRNPA2B1	Heterogeneous nuclear ribonucleoproteins A2/B1	1.35483	0.0488842	2.2789e-07	47	0
P09651	HNRNPA1	Heterogeneous nuclear ribonucleoprotein A1	1.35419	0.0385755	9.70063e-10	47	0
P24534	EEF1B2	Elongation factor 1-beta	1.35152	0.0228046	1.70379e-16	47	0
Q13505	MTX1	Metaxin-1	1.35082	0.037824	7.26332e-10	47	0
P11216	PYGB	Glycogen phosphorylase, brain form	1.34976	0.043092	1.8811e-08	47	0
Q8NE71	ABCF1	ATP-binding cassette sub-family F member 1	1.34897	0.0448862	4.95653e-08	47	0
Q00059	TFAM	Transcription factor A, mitochondrial	1.34884	0.0505752	1.16188e-07	40	15
P26641	EEF1G	Elongation factor 1-gamma	1.34704	0.0226917	2.12929e-16	47	0
Q13347	EIF3I	Eukaryotic translation initiation factor 3 subunit I	1.34687	0.0279827	1.88012e-13	47	0
P61978	HNRNPK	Heterogeneous nuclear ribonucleoprotein K	1.34609	0.0294371	9.36944e-13	47	0
P08865	RPSA	40S ribosomal protein SA	1.34504	0.0358054	2.58772e-10	47	0
P12004	PCNA	Proliferating cell nuclear antigen	1.34369	0.034722	1.23427e-10	47	0
Q99623	PHB2	Prohibitin-2	1.34219	0.0270645	9.68428e-14	47	0
Proteins Not Altered Significantly Relative to Normal Choroid4
P18077	RPL35A	60S ribosomal protein L35a	2.32739	0.064889	8.75714e-19	36	23
O60522	TDRD6	Tudor domain-containing protein 6	2.02378	0.0802386	1.14326e-20	13	72
Q9BQ67	GRWD1	Glutamate-rich WD repeat-containing protein 1	1.77652	0.0679692	4.65162e-23	9	81
Q5VIR6	VPS53	Vacuolar protein sorting-associated protein 53 homolog	1.77519	0.0539732	9.05864e-16	35	26
Q86VV8	RTTN	Rotatin	1.6396	0.0843791	1.98798e-09	28	40
Q8IV61	RASGRP3	Ras guanyl-releasing protein 3	1.63787	0.0526212	4.21747e-18	20	57
Q9Y399	MRPS2	28S ribosomal protein S2, mitochondrial	1.63129	0.0676011	1.52708e-13	22	53
O14907	TAX1BP3	Tax1-binding protein 3	1.61612	0.0636042	3.99806e-14	22	53
Q969Q0	RPL36AL	60S ribosomal protein L36a-like	1.56174	0.0669818	6.38617e-10	33	30
Q9NX20	MRPL16	39S ribosomal protein L16, mitochondrial	1.56095	0.0396914	8.81711e-20	23	51
Q9UNX3	RPL26L1	60S ribosomal protein L26-like 1	1.55813	0.0490856	8.72045e-14	33	30
Q92979	EMG1	Ribosomal RNA small subunit methyltransferase NEP1	1.55579	0.0467024	6.73033e-15	31	34
Q92804	TAF15	TATA-binding protein-associated factor 2N	1.55538	0.0523155	4.28651e-15	24	49
Q9NQZ2	UTP3	Something about silencing protein 10	1.54964	0.0582166	1.15896e-12	27	43
Q9NY12	GAR1	H/ACA ribonucleoprotein complex subunit 1	1.54474	0.0488113	1.39131e-13	33	30
Q8NHX9	TPCN2	Two pore calcium channel protein 2	1.53035	0.0746146	2.34865e-11	19	60
P38571	LIPA	Lysosomal acid lipase/cholesteryl ester hydrolase	1.51034	0.101899	1.6291e-05	32	32
P25205	MCM3	DNA replication licensing factor MCM3	1.49263	0.0687284	9.38233e-10	26	45
Q9BPU6	DPYSL5	Dihydropyrimidinase-related protein 5	1.49177	0.0560804	1.31342e-13	21	55
Q8IXM6	NRM	Nurim	1.47989	0.0443787	2.6185e-18	17	64
P46087	NOP2	Probable 28S rRNA (cytosine(4447)-C(5))-methyltransferase	1.47845	0.0406711	8.15839e-14	37	21
O95453	PARN	Poly(A)-specific ribonuclease PARN	1.47636	0.0344286	3.76278e-16	37	21
Q9H1E3	NUCKS1	Nuclear ubiquitous casein and cyclin-dependent kinase substrate 1	1.47284	0.080998	4.62589e-07	30	36
Q01780	EXOSC10	Exosome component 10	1.47164	0.0431479	4.68764e-14	31	34
P18754	RCC1	Regulator of chromosome condensation	1.46874	0.0655688	1.07172e-08	32	32
P0DPK2	H3Y1	Histone H3.Y	1.46819	0.0533656	8.07021e-15	18	62
Q13895	BYSL	Bystin	1.46276	0.0418885	4.2863e-17	21	55
Q9NPJ3	ACOT13	Acyl-coenzyme A thioesterase 13	1.44909	0.0389197	1.74854e-14	33	30
P63167	DYNLL1	Dynein light chain 1, cytoplasmic	1.44372	0.0367898	6.27458e-15	34	28
Q9NXD2	MTMR10	Myotubularin-related protein 10	1.43074	0.0481461	1.11832e-17	13	72
Q9UKK3	PARP4	Protein mono-ADP-ribosyltransferase PARP4	1.42035	0.0766807	4.16132e-10	15	68
Q9BXW7	HDHD5	Haloacid dehalogenase-like hydrolase domain-containing 5	1.4184	0.0424594	6.52043e-12	36	23
Q9Y606	PUS1	tRNA pseudouridine synthase A	1.41666	0.0299882	4.07378e-17	34	28
P84090	ERH	Enhancer of rudimentary homolog	1.40433	0.0613191	1.24088e-11	17	64
Q658Y4	FAM91A1	Protein FAM91A1	1.40168	0.0275032	1.73048e-22	19	60
P08631	HCK	Tyrosine-protein kinase HCK	1.40035	0.0847936	3.35974e-07	20	57
Q9NW13	RBM28	RNA-binding protein 28	1.39623	0.038572	2.32357e-12	37	21
Q8IXM3	MRPL41	39S ribosomal protein L41, mitochondrial	1.39412	0.0293976	1.90445e-16	35	26
Q9Y5J1	UTP18	U3 small nucleolar RNA-associated protein 18 homolog	1.39362	0.0271792	7.67653e-18	34	28
Q92922	SMARCC1	SWI/SNF complex subunit SMARCC1	1.3814	0.0771699	1.11926e-07	20	57
Q9GZT3	SLIRP	SRA stem-loop-interacting RNA-binding protein, mitochondrial	1.37805	0.0655789	2.151e-07	29	38
O00541	PES1	Pescadillo homolog	1.37635	0.0482665	2.4949e-09	36	23
Q9Y6D9	MAD1L1	Mitotic spindle assembly checkpoint protein MAD1	1.37495	0.10008	5.25004e-05	23	51
Q14315	FLNC	Filamin-C	1.37337	0.0915783	2.74008e-05	25	47
Q6DKI1	RPL7L1	60S ribosomal protein L7-like 1	1.37076	0.0557376	4.53835e-10	23	51
Q9HD33	MRPL47	39S ribosomal protein L47, mitochondrial	1.37037	0.0372586	8.97743e-13	33	30
O00193	SMAP	Small acidic protein	1.36635	0.0648636	3.08725e-06	37	21
Q9UKL6	PCTP	Phosphatidylcholine transfer protein	1.3631	0.0269971	3.85068e-22	17	64
Q8N983	MRPL43	39S ribosomal protein L43, mitochondrial	1.36284	0.0432759	2.10119e-16	14	70
P62841	RPS15	40S ribosomal protein S15	1.35024	0.0851082	4.90914e-05	28	40
Q9NRK6	ABCB10	ATP-binding cassette sub-family B member 10, mitochondrial	1.34294	0.0807622	1.77067e-06	20	57
Q7L2H7	EIF3M	Eukaryotic translation initiation factor 3 subunit M	1.33862	0.0234505	1.32518e-15	47	0
P31948	STIP1	Stress-induced-phosphoprotein 1	1.33655	0.0355745	3.87734e-10	47	0
Q68DK2	ZFYVE26	Zinc finger FYVE domain-containing protein 26	1.33497	0.0356669	6.4932e-15	22	53
Q9P1F3	ABRACL	Costars family protein ABRACL	1.33367	0.0886676	0.00105033	39	17
Q08623	PUDP	Pseudouridine-5~-phosphatase	1.33312	0.0433394	2.07049e-08	43	9
Q99536	VAT1	Synaptic vesicle membrane protein VAT-1 homolog	1.33289	0.040948	1.5967e-08	47	0
Q8NBJ5	COLGALT1	Procollagen galactosyltransferase 1	1.3311	0.0415186	1.06287e-12	22	53
P26368	U2AF2	Splicing factor U2AF 65 kDa subunit	1.32786	0.0225362	9.63925e-16	47	0
Q13630	TSTA3	GDP-L-fucose synthase	1.32651	0.0416161	3.39971e-08	47	0
P20674	COX5A	Cytochrome c oxidase subunit 5A, mitochondrial	1.3264	0.0569548	8.18155e-06	44	6
Q96GC9	VMP1	Vacuole membrane protein 1	1.32636	0.0501714	3.14057e-10	22	53
Q13310	PABPC4	Polyadenylate-binding protein 4	1.32626	0.0304051	4.0725e-15	28	40
O43752	STX6	Syntaxin-6	1.326	0.0505921	1.90429e-06	47	0
Q9Y2X7	GIT1	ARF GTPase-activating protein GIT1	1.32556	0.0518362	2.32589e-07	36	23
P29692	EEF1D	Elongation factor 1-delta	1.32541	0.0263275	1.70434e-13	47	0
P39656	DDOST	Dolichyl-diphosphooligosaccharide--protein glycosyltransferase 48 kDa subunit	1.32438	0.0238478	7.97637e-15	47	0
Q14166	TTLL12	Tubulin--tyrosine ligase-like protein 12	1.32403	0.0286392	2.36456e-12	47	0
Q8WU90	ZC3H15	Zinc finger CCCH domain-containing protein 15	1.32317	0.0335566	1.48499e-12	33	30
Q13423	NNT	NAD(P) transhydrogenase, mitochondrial	1.32234	0.0343622	4.26e-10	47	0
P07900	HSP90AA1	Heat shock protein HSP 90-alpha	1.32143	0.0164161	3.70298e-20	47	0
P30050	RPL12	60S ribosomal protein L12	1.32141	0.0279978	1.50889e-12	47	0
P25398	RPS12	40S ribosomal protein S12	1.32108	0.0731762	0.000523404	47	0
Q9Y680	FKBP7	Peptidyl-prolyl cis-trans isomerase FKBP7	1.32026	0.044331	3.1379e-11	23	51
P82650	MRPS22	28S ribosomal protein S22, mitochondrial	1.31988	0.0456214	3.86882e-11	22	53
O75821	EIF3G	Eukaryotic translation initiation factor 3 subunit G	1.3196	0.0338796	3.62143e-10	47	0
Q8WYA6	CTNNBL1	Beta-catenin-like protein 1	1.31902	0.035853	1.59078e-09	47	0
Q9Y383	LUC7L2	Putative RNA-binding protein Luc7-like 2	1.31749	0.0286027	3.86767e-12	47	0
Q9H3H5	DPAGT1	UDP-N-acetylglucosamine--dolichyl-phosphate N-acetylglucosaminephosphotransferase	1.31675	0.0495786	2.30215e-09	25	47
Q9Y2S2	CRYL1	Lambda-crystallin homolog	1.31616	0.0446811	2.90267e-07	47	0
Q9BR76	CORO1B	Coronin-1B	1.31603	0.0290308	6.77265e-12	47	0
P67812	SEC11A	Signal peptidase complex catalytic subunit SEC11A	1.31556	0.032796	5.69294e-13	31	34
P0DP23	CALM1	Calmodulin-1	1.31468	0.104036	0.0132679	47	0
Q9H9Q2	COPS7B	COP9 signalosome complex subunit 7b	1.31431	0.0342552	1.97867e-11	36	23
P54819	AK2	Adenylate kinase 2, mitochondrial	1.31374	0.0379368	9.10533e-09	47	0
P28066	PSMA5	Proteasome subunit alpha type-5	1.31306	0.0150152	4.07298e-21	47	0
O60343	TBC1D4	TBC1 domain family member 4	1.3123	0.048042	2.36773e-07	39	17
Q96FW1	OTUB1	Ubiquitin thioesterase OTUB1	1.30829	0.0362783	4.5586e-09	47	0
Q96DG6	CMBL	Carboxymethylenebutenolidase homolog	1.30789	0.0360422	1.31975e-10	36	23
P26640	VARS1	Valine--tRNA ligase	1.30759	0.0267497	1.29411e-12	47	0
O15372	EIF3H	Eukaryotic translation initiation factor 3 subunit H	1.30739	0.0297518	2.78316e-11	47	0
Q9BXD5	NPL	N-acetylneuraminate lyase	1.30709	0.0978018	0.00670425	42	11
Q08170	SRSF4	Serine/arginine-rich splicing factor 4	1.30655	0.0342763	5.4486e-15	20	57
Q9UHQ9	CYB5R1	NADH-cytochrome b5 reductase 1	1.30455	0.0310581	1.13359e-10	47	0
P08238	HSP90AB1	Heat shock protein HSP 90-beta	1.30412	0.0291942	2.15812e-11	47	0
Q9HD67	MYO10	Unconventional myosin-X	1.3034	0.0366067	7.9671e-09	47	0
Q99729	HNRNPAB	Heterogeneous nuclear ribonucleoprotein A/B	1.3028	0.0464053	1.28574e-06	47	0
P09525	ANXA4	Annexin A4	1.30219	0.0488634	3.38761e-06	47	0
O15145	ARPC3	Actin-related protein 2/3 complex subunit 3	1.30133	0.0317134	2.58855e-10	47	0
Q96RT1	ERBIN	Erbin	1.30045	0.0324035	4.78513e-10	47	0
P22234	PAICS	Multifunctional protein ADE2	1.30023	0.0325455	5.43872e-10	47	0
Q8TDN6	BRIX1	Ribosome biogenesis protein BRX1 homolog	1.29852	0.0531676	4.35371e-06	40	15
P41250	GARS1	Glycine--tRNA ligase	1.29806	0.0281179	1.25579e-11	47	0
P08754	GNAI3	Guanine nucleotide-binding protein G(i) subunit alpha	1.29783	0.0329305	2.08187e-10	42	11
Q9NQ50	MRPL40	39S ribosomal protein L40, mitochondrial	1.29773	0.0260375	5.30774e-13	44	6
Q9NVI7	ATAD3A	ATPase family AAA domain-containing protein 3A	1.29716	0.0331872	1.14354e-09	47	0
O15116	LSM1	U6 snRNA-associated Sm-like protein LSm1	1.29705	0.0300441	9.10439e-12	40	15
Q96C90	PPP1R14B	Protein phosphatase 1 regulatory subunit 14B	1.29635	0.0624313	6.11539e-05	40	15
P55010	EIF5	Eukaryotic translation initiation factor 5	1.296	0.0408798	1.55321e-07	47	0
P13010	XRCC5	X-ray repair cross-complementing protein 5	1.2959	0.0172617	3.2746e-18	47	0
Q13283	G3BP1	Ras GTPase-activating protein-binding protein 1	1.29494	0.0342315	1.28828e-09	44	6
Q9UNX4	WDR3	WD repeat-containing protein 3	1.29403	0.0411876	7.99472e-08	43	9
Q9HB19	PLEKHA2	Pleckstrin homology domain-containing family A member 2	1.29311	0.0522213	1.57322e-09	19	60
P82675	MRPS5	28S ribosomal protein S5, mitochondrial	1.29308	0.0334005	2.66056e-12	29	38
Q00688	FKBP3	Peptidyl-prolyl cis-trans isomerase FKBP3	1.29243	0.0290654	5.11786e-11	47	0
P55884	EIF3B	Eukaryotic translation initiation factor 3 subunit B	1.29176	0.0181698	2.87516e-17	47	0
O75083	WDR1	WD repeat-containing protein 1	1.29153	0.0254896	1.33326e-12	47	0
Q96PK6	RBM14	RNA-binding protein 14	1.29089	0.025474	1.38656e-12	47	0
Q14444	CAPRIN1	Caprin-1	1.29041	0.0332449	1.99417e-09	47	0
P12956	XRCC6	X-ray repair cross-complementing protein 6	1.28918	0.0180773	3.21714e-17	47	0
P46199	MTIF2	Translation initiation factor IF-2, mitochondrial	1.28918	0.0303255	8.71198e-11	44	6
P13804	ETFA	Electron transfer flavoprotein subunit alpha, mitochondrial	1.28821	0.0369141	2.83076e-08	47	0
P13686	ACP5	Tartrate-resistant acid phosphatase type 5	1.28781	0.0692006	0.000570466	44	6
P11177	PDHB	Pyruvate dehydrogenase E1 component subunit beta, mitochondrial	1.28757	0.0310341	4.403e-10	47	0
P22570	FDXR	NADPH:adrenodoxin oxidoreductase, mitochondrial	1.28661	0.0407326	2.62794e-07	47	0
P51148	RAB5C	Ras-related protein Rab-5C	1.28644	0.0229958	9.84403e-14	47	0
P42785	PRCP	Lysosomal Pro-X carboxypeptidase	1.28588	0.0481344	6.08798e-06	47	0
Q53H82	LACTB2	Endoribonuclease LACTB2	1.28561	0.0378062	5.76346e-08	47	0
Q9UBS8	RNF14	E3 ubiquitin-protein ligase RNF14	1.28495	0.0412848	5.54997e-09	32	32
Q12931	TRAP1	Heat shock protein 75 kDa, mitochondrial	1.28369	0.0206341	4.32193e-15	47	0
P13807	GYS1	Glycogen [starch] synthase, muscle	1.28302	0.0384359	9.86461e-08	47	0
O75962	TRIO	Triple functional domain protein	1.28277	0.037358	6.16613e-12	23	51
Q8NFF5	FLAD1	FAD synthase	1.28113	0.0462207	1.32193e-07	33	30
O15371	EIF3D	Eukaryotic translation initiation factor 3 subunit D	1.2809	0.017039	1.13797e-17	47	0
Q15084	PDIA6	Protein disulfide-isomerase A6	1.28007	0.0282015	6.59242e-11	47	0
Q9Y485	DMXL1	DmX-like protein 1	1.27971	0.0395267	1.78462e-07	46	2
P21912	SDHB	Succinate dehydrogenase [ubiquinone] iron-sulfur subunit, mitochondrial	1.27951	0.0355817	2.29557e-08	47	0
P48556	PSMD8	26S proteasome non-ATPase regulatory subunit 8	1.27891	0.0234349	3.72904e-13	47	0
P06576	ATP5F1B	ATP synthase subunit beta, mitochondrial	1.27866	0.0218191	4.35155e-14	47	0
Q3KQV9	UAP1L1	UDP-N-acetylhexosamine pyrophosphorylase-like protein 1	1.27673	0.0398712	3.2321e-07	47	0
Q9UKN8	GTF3C4	General transcription factor 3C polypeptide 4	1.27671	0.0576841	6.30431e-06	31	34
P00338	LDHA	L-lactate dehydrogenase A chain	1.27644	0.0405451	4.59413e-07	47	0
Q15269	PWP2	Periodic tryptophan protein 2 homolog	1.27615	0.0552872	2.38002e-06	30	36
P09661	SNRPA1	U2 small nuclear ribonucleoprotein A~	1.27608	0.0396938	4.24759e-08	39	17
O43399	TPD52L2	Tumor protein D54	1.276	0.0467726	6.37671e-06	47	0
Q15063	POSTN	Periostin	1.27595	0.0742995	0.00240586	47	0
P07919	UQCRH	Cytochrome b-c1 complex subunit 6, mitochondrial	1.27554	0.056507	1.31212e-05	35	26
Q9BRJ2	MRPL45	39S ribosomal protein L45, mitochondrial	1.27511	0.0317307	1.34412e-11	32	32
P32321	DCTD	Deoxycytidylate deaminase	1.2744	0.0450235	8.36048e-07	40	15
Q5JRX3	PITRM1	Presequence protease, mitochondrial	1.27431	0.0301928	6.58424e-10	47	0
Q15274	QPRT	Nicotinate-nucleotide pyrophosphorylase [carboxylating]	1.27363	0.0397892	3.80183e-07	47	0
P51809	VAMP7	Vesicle-associated membrane protein 7	1.27325	0.0333726	9.71406e-11	33	30
Q9Y305	ACOT9	Acyl-coenzyme A thioesterase 9, mitochondrial	1.27275	0.0353924	3.37939e-08	47	0
Q9Y3B4	SF3B6	Splicing factor 3B subunit 6	1.27224	0.0324818	3.45632e-14	20	57
P61020	RAB5B	Ras-related protein Rab-5B	1.27182	0.047768	1.14552e-05	47	0
P31937	HIBADH	3-hydroxyisobutyrate dehydrogenase, mitochondrial	1.27107	0.0239757	1.60128e-12	47	0
P16152	CBR1	Carbonyl reductase [NADPH] 1	1.27087	0.0415151	1.03917e-06	47	0
Q9H2K8	TAOK3	Serine/threonine-protein kinase TAO3	1.2706	0.0317716	1.11626e-12	26	45
Q07666	KHDRBS1	KH domain-containing, RNA-binding, signal transduction-associated protein 1	1.27036	0.0453172	5.14264e-06	47	0
Q9Y3B7	MRPL11	39S ribosomal protein L11, mitochondrial	1.2696	0.0313098	3.62192e-11	34	28
Q9Y2B0	CNPY2	Protein canopy homolog 2	1.26932	0.0339876	1.7576e-08	47	0
O00115	DNASE2	Deoxyribonuclease-2-alpha	1.26899	0.0664318	0.000184074	35	26
Q13151	HNRNPA0	Heterogeneous nuclear ribonucleoprotein A0	1.26875	0.0564448	0.00015229	47	0
Q9UBQ5	EIF3K	Eukaryotic translation initiation factor 3 subunit K	1.2683	0.0398344	5.5342e-07	47	0
Q9H9C1	VIPAS39	Spermatogenesis-defective protein 39 homolog	1.26815	0.0297307	2.63625e-12	31	34
P05141	SLC25A5	ADP/ATP translocase 2	1.26779	0.0354481	5.04731e-08	47	0
Q9H2W6	MRPL46	39S ribosomal protein L46, mitochondrial	1.26774	0.104015	6.06015e-05	12	74
P33316	DUT	Deoxyuridine 5~-triphosphate nucleotidohydrolase, mitochondrial	1.26766	0.0446658	3.90329e-06	46	2
Q92688	ANP32B	Acidic leucine-rich nuclear phosphoprotein 32 family member B	1.26741	0.0428552	2.32961e-06	47	0
P31749	AKT1	RAC-alpha serine/threonine-protein kinase	1.26737	0.0320058	5.4094e-11	33	30
O75608	LYPLA1	Acyl-protein thioesterase 1	1.26711	0.0372186	1.52319e-07	47	0
Q8N4T8	CBR4	Carbonyl reductase family member 4	1.26695	0.0368953	2.22001e-09	33	30
Q9P0U1	TOMM7	Mitochondrial import receptor subunit TOM7 homolog	1.26666	0.0652455	3.41801e-05	28	40
P53007	SLC25A1	Tricarboxylate transport protein, mitochondrial	1.26648	0.0253868	1.30114e-11	47	0
P31942	HNRNPH3	Heterogeneous nuclear ribonucleoprotein H3	1.26525	0.02304	9.2526e-13	47	0
P35268	RPL22	60S ribosomal protein L22	1.26493	0.0405473	9.7297e-07	47	0
O14773	TPP1	Tripeptidyl-peptidase 1	1.26447	0.0513387	5.08235e-05	47	0
P15121	AKR1B1	Aldo-keto reductase family 1 member B1	1.26353	0.0361626	1.06935e-07	47	0
P35244	RPA3	Replication protein A 14 kDa subunit	1.26308	0.0296569	3.60966e-10	43	9
P54727	RAD23B	UV excision repair protein RAD23 homolog B	1.26268	0.0238104	3.04853e-12	47	0
O95219	SNX4	Sorting nexin-4	1.2624	0.0440916	1.91888e-06	42	11
P43686	PSMC4	26S proteasome regulatory subunit 6B	1.26202	0.0255559	2.441e-11	47	0
P40939	HADHA	Trifunctional enzyme subunit alpha, mitochondrial	1.2617	0.0301048	1.81598e-09	47	0
P50990	CCT8	T-complex protein 1 subunit theta	1.26154	0.0235332	2.47247e-12	47	0
Q32MZ4	LRRFIP1	Leucine-rich repeat flightless-interacting protein 1	1.2615	0.057279	4.13791e-06	27	43
P07437	TUBB	Tubulin beta chain	1.26116	0.0356199	9.2419e-08	47	0
Q9H446	RWDD1	RWD domain-containing protein 1	1.26083	0.0514004	2.18057e-06	31	34
Q9NRX2	MRPL17	39S ribosomal protein L17, mitochondrial	1.26026	0.0393489	4.76547e-08	36	23
P55036	PSMD4	26S proteasome non-ATPase regulatory subunit 4	1.25965	0.038825	8.8965e-08	39	17
P11279	LAMP1	Lysosome-associated membrane glycoprotein 1	1.25923	0.0335188	2.83076e-08	47	0
Q9Y265	RUVBL1	RuvB-like 1	1.25915	0.0327342	1.67052e-08	47	0
O14602	EIF1AY	Eukaryotic translation initiation factor 1A, Y-chromosomal	1.25912	0.0475312	1.77537e-05	46	2
P55072	VCP	Transitional endoplasmic reticulum ATPase	1.25782	0.0146707	1.41159e-18	47	0
Q9BZE4	GTPBP4	Nucleolar GTP-binding protein 1	1.25776	0.0344155	5.68974e-08	47	0
P00395	MT-CO1	Cytochrome c oxidase subunit 1	1.2576	0.0460816	8.15509e-06	44	6
Q13409	DYNC1I2	Cytoplasmic dynein 1 intermediate chain 2	1.25686	0.0384173	1.14732e-07	40	15
Q13084	MRPL28	39S ribosomal protein L28, mitochondrial	1.25685	0.0421355	3.2899e-06	47	0
P61254	RPL26	60S ribosomal protein L26	1.25407	0.0781833	2.04719e-07	10	79
Q9BTC0	DIDO1	Death-inducer obliterator 1	1.25366	0.0716712	3.24835e-08	10	79
Q9UFN0	NIPSNAP3A	Protein NipSnap homolog 3A	1.2529	0.0408593	2.45129e-06	47	0
P23497	SP100	Nuclear autoantigen Sp-100	1.2523	0.0428443	1.54415e-07	32	32
P60953	CDC42	Cell division control protein 42 homolog	1.25228	0.0260312	1.04366e-10	47	0
Q9UBE0	SAE1	SUMO-activating enzyme subunit 1	1.25213	0.0357723	2.00434e-07	47	0
P23526	AHCY	Adenosylhomocysteinase	1.2516	0.0261649	1.28232e-10	47	0
Q9Y333	LSM2	U6 snRNA-associated Sm-like protein LSm2	1.25147	0.0291996	9.38252e-10	44	6
P49354	FNTA	Protein farnesyltransferase/geranylgeranyltransferase type-1 subunit alpha	1.251	0.0329595	3.77894e-08	47	0
B5ME19	EIF3CL	Eukaryotic translation initiation factor 3 subunit C-like protein	1.25091	0.028054	8.31024e-10	47	0
Q08752	PPID	Peptidyl-prolyl cis-trans isomerase D	1.25072	0.0377466	8.61023e-10	26	45
P04062	GBA	Lysosomal acid glucosylceramidase	1.25032	0.0482361	4.23202e-05	47	0
Q15388	TOMM20	Mitochondrial import receptor subunit TOM20 homolog	1.25012	0.0555178	5.79109e-05	37	21
P11586	MTHFD1	C-1-tetrahydrofolate synthase, cytoplasmic	1.24982	0.0246315	3.02406e-11	47	0
P53990	IST1	IST1 homolog	1.24969	0.0370899	7.18884e-08	39	17
Q96CM8	ACSF2	Medium-chain acyl-CoA ligase ACSF2, mitochondrial	1.24945	0.126265	0.000271861	9	81
Q15046	KARS1	Lysine--tRNA ligase	1.24898	0.0316422	1.78456e-08	47	0
P60033	CD81	CD81 antigen	1.24863	0.0596132	0.000674447	47	0
O94832	MYO1D	Unconventional myosin-Id	1.24798	0.0471265	3.39078e-05	47	0
O15173	PGRMC2	Membrane-associated progesterone receptor component 2	1.24737	0.0367944	4.99076e-07	47	0
Q10713	PMPCA	Mitochondrial-processing peptidase subunit alpha	1.24732	0.0442806	7.78776e-06	44	6
Q96EQ0	SGTB	Small glutamine-rich tetratricopeptide repeat-containing protein beta	1.24726	0.0813725	1.82027e-06	11	77
O00584	RNASET2	Ribonuclease T2	1.24678	0.079672	0.00677934	43	9
P08195	SLC3A2	4F2 cell-surface antigen heavy chain	1.24672	0.0361377	3.6694e-07	47	0
Q9Y6U3	SCIN	Adseverin	1.24538	0.119454	0.0461096	36	23
P48047	ATP5PO	ATP synthase subunit O, mitochondrial	1.24502	0.0301679	8.31277e-09	47	0
P49773	HINT1	Histidine triad nucleotide-binding protein 1	1.245	0.041642	5.57886e-06	47	0
Q8NBQ5	HSD17B11	Estradiol 17-beta-dehydrogenase 11	1.24425	0.0577381	0.000566088	47	0
P22102	GART	Trifunctional purine biosynthetic protein adenosine-3	1.24352	0.0273652	8.94542e-10	47	0
Q15363	TMED2	Transmembrane emp24 domain-containing protein 2	1.24297	0.0581034	0.000639318	47	0
O14561	NDUFAB1	Acyl carrier protein, mitochondrial	1.2426	0.0762557	0.00765315	47	0
P25705	ATP5F1A	ATP synthase subunit alpha, mitochondrial	1.24215	0.0212382	1.07843e-12	47	0
O43676	NDUFB3	NADH dehydrogenase [ubiquinone] 1 beta subcomplex subunit 3	1.24197	0.0706271	1.89611e-08	9	81
O00560	SDCBP	Syntenin-1	1.2416	0.0501251	0.00011346	47	0
Q9H0U4	RAB1B	Ras-related protein Rab-1B	1.24008	0.03691	1.61635e-08	32	32
Q9ULC4	MCTS1	Malignant T-cell-amplified sequence 1	1.23945	0.0316391	3.14991e-08	46	2
Q9NQ88	TIGAR	Fructose-2,6-bisphosphatase TIGAR	1.23931	0.0549403	5.94181e-05	35	26
P46782	RPS5	40S ribosomal protein S5	1.23897	0.0341216	2.09263e-07	47	0
Q9NTG7	SIRT3	NAD-dependent protein deacetylase sirtuin-3, mitochondrial	1.23888	0.0467054	3.72138e-06	34	28
O15042	U2SURP	U2 snRNP-associated SURP motif-containing protein	1.23827	0.0362612	3.85102e-07	44	6
P51398	DAP3	28S ribosomal protein S29, mitochondrial	1.23824	0.0427333	3.40836e-06	40	15
P67809	YBX1	Y-box-binding protein 1	1.23779	0.0627279	2.45161e-07	14	70
Q9NYF8	BCLAF1	Bcl-2-associated transcription factor 1	1.23728	0.104002	0.00224126	18	62
P38646	HSPA9	Stress-70 protein, mitochondrial	1.23703	0.0232668	2.48562e-11	47	0
Q49A26	GLYR1	Putative oxidoreductase GLYR1	1.23666	0.0176559	9.9651e-16	41	13
P51452	DUSP3	Dual specificity protein phosphatase 3	1.2361	0.0322808	8.20995e-08	47	0
Q9NSD9	FARSB	Phenylalanine--tRNA ligase beta subunit	1.23601	0.0332653	1.56268e-07	47	0
Q9UK45	LSM7	U6 snRNA-associated Sm-like protein LSm7	1.23504	0.032118	1.00903e-08	39	17
Q12965	MYO1E	Unconventional myosin-Ie	1.23486	0.0338252	4.3792e-08	40	15
Q06830	PRDX1	Peroxiredoxin-1	1.23483	0.0325125	1.06446e-07	47	0
P51810	GPR143	G-protein coupled receptor 143	1.23342	0.0688496	0.00455882	47	0
P52272	HNRNPM	Heterogeneous nuclear ribonucleoprotein M	1.23309	0.0269876	1.75171e-09	47	0
Q9H4A4	RNPEP	Aminopeptidase B	1.23288	0.0253721	3.84804e-10	47	0
A6NHQ2	FBLL1	rRNA/tRNA 2~-O-methyltransferase fibrillarin-like protein 1	1.23259	0.0352472	2.72723e-07	43	9
Q9UMY4	SNX12	Sorting nexin-12	1.2324	0.0211455	2.8847e-12	47	0
P30048	PRDX3	Thioredoxin-dependent peroxide reductase, mitochondrial	1.23202	0.0286747	8.31969e-09	47	0
Q9ULV4	CORO1C	Coronin-1C	1.23157	0.0360985	1.11078e-06	47	0
Q14697	GANAB	Neutral alpha-glucosidase AB	1.23122	0.0261497	9.70063e-10	47	0
P46977	STT3A	Dolichyl-diphosphooligosaccharide--protein glycosyltransferase subunit STT3A	1.23117	0.0288435	1.03545e-08	47	0
Q9UIJ7	AK3	GTP:AMP phosphotransferase AK3, mitochondrial	1.23111	0.0382352	3.27092e-06	47	0
Q6P587	FAHD1	Acylpyruvase FAHD1, mitochondrial	1.23058	0.0344965	5.02139e-07	47	0
Q9UBV8	PEF1	Peflin	1.23037	0.0312865	6.84333e-08	47	0
P04075	ALDOA	Fructose-bisphosphate aldolase A	1.23031	0.0250956	3.80912e-10	47	0
Q6GMV2	SMYD5	SET and MYND domain-containing protein 5	1.23031	0.0235623	2.68133e-12	37	21
O14979	HNRNPDL	Heterogeneous nuclear ribonucleoprotein D-like	1.23026	0.0564838	0.000798179	47	0
Q8N2K0	ABHD12	Lysophosphatidylserine lipase ABHD12	1.22928	0.0497143	3.91886e-06	28	40
Q14011	CIRBP	Cold-inducible RNA-binding protein	1.22925	0.0315024	8.7684e-08	47	0
P52701	MSH6	DNA mismatch repair protein Msh6	1.22903	0.0252266	1.1533e-10	42	11
Q01518	CAP1	Adenylyl cyclase-associated protein 1	1.22888	0.0251819	4.78154e-10	47	0
O75323	NIPSNAP2	Protein NipSnap homolog 2	1.22877	0.0317392	1.37281e-08	39	17
O75390	CS	Citrate synthase, mitochondrial	1.22875	0.0255395	6.91966e-10	47	0
Q96C23	GALM	Galactose mutarotase	1.2286	0.0573316	0.000999854	47	0
P83111	LACTB	Serine beta-lactamase-like protein LACTB, mitochondrial	1.22825	0.0532831	0.000202301	41	13
P50454	SERPINH1	Serpin H1	1.22749	0.029462	2.35601e-08	47	0
O43809	NUDT21	Cleavage and polyadenylation specificity factor subunit 5	1.22749	0.0252598	5.98412e-10	47	0
P60660	MYL6	Myosin light polypeptide 6	1.22632	0.0278152	7.08421e-09	47	0
O00625	PIR	Pirin	1.22464	0.0693494	0.00634284	47	0
Q13200	PSMD2	26S proteasome non-ATPase regulatory subunit 2	1.22418	0.0206109	3.74251e-12	47	0
P04843	RPN1	Dolichyl-diphosphooligosaccharide--protein glycosyltransferase subunit 1	1.22388	0.0238319	2.01234e-10	47	0
Q9NRV9	HEBP1	Heme-binding protein 1	1.2237	0.0476646	0.000147514	47	0
P49368	CCT3	T-complex protein 1 subunit gamma	1.2234	0.0243184	3.57738e-10	47	0
Q00839	HNRNPU	Heterogeneous nuclear ribonucleoprotein U	1.2232	0.0497804	0.000261774	47	0
Q13838	DDX39B	Spliceosome RNA helicase DDX39B	1.223	0.0255455	1.27834e-09	47	0
Q9NY61	AATF	Protein AATF	1.22269	0.101125	2.39383e-05	8	83
Q86UT6	NLRX1	NLR family member X1	1.22244	0.0911324	0.00231985	21	55
P56385	ATP5ME	ATP synthase subunit e, mitochondrial	1.22214	0.0340701	7.70494e-07	47	0
O95819	MAP4K4	Mitogen-activated protein kinase kinase kinase kinase 4	1.22157	0.0289505	3.20585e-09	39	17
P07910	HNRNPC	Heterogeneous nuclear ribonucleoproteins C1/C2	1.22145	0.0255867	1.55995e-09	47	0
O43157	PLXNB1	Plexin-B1	1.22129	0.0627125	0.00114327	38	19
Q9BXR0	QTRT1	Queuine tRNA-ribosyltransferase catalytic subunit 1	1.22052	0.053524	2.28753e-09	11	77
P49789	FHIT	Bis(5~-adenosyl)-triphosphatase	1.22033	0.0524535	9.58094e-06	26	45
O00487	PSMD14	26S proteasome non-ATPase regulatory subunit 14	1.22001	0.0324107	3.48039e-07	47	0
P40227	CCT6A	T-complex protein 1 subunit zeta	1.21948	0.0214574	2.05649e-11	47	0
Q86WB0	ZC3HC1	Nuclear-interacting partner of ALK	1.21931	0.0301496	1.04735e-08	39	17
Q9UBV2	SEL1L	Protein sel-1 homolog 1	1.21877	0.0600673	0.000815698	38	19
Q16186	ADRM1	Proteasomal ubiquitin receptor ADRM1	1.21845	0.0438475	6.42775e-05	47	0
P36404	ARL2	ADP-ribosylation factor-like protein 2	1.21802	0.0396865	1.48489e-05	47	0
P56182	RRP1	Ribosomal RNA processing protein 1 homolog A	1.21728	0.0608178	4.04515e-06	17	64
Q07812	BAX	Apoptosis regulator BAX	1.21715	0.042497	1.07771e-06	30	36
Q8NC56	LEMD2	LEM domain-containing protein 2	1.21694	0.0364878	3.98141e-06	47	0
O15498	YKT6	Synaptobrevin homolog YKT6	1.21659	0.0268341	4.84737e-09	45	4
Q9NR56	MBNL1	Muscleblind-like protein 1	1.2163	0.0783198	2.56582e-09	5	89
O00154	ACOT7	Cytosolic acyl coenzyme A thioester hydrolase	1.21592	0.0372086	5.94441e-06	47	0
Q9NXG2	THUMPD1	THUMP domain-containing protein 1	1.21576	0.0244252	1.99185e-11	35	26
Q99832	CCT7	T-complex protein 1 subunit eta	1.21569	0.0263012	5.53655e-09	47	0
O43464	HTRA2	Serine protease HTRA2, mitochondrial	1.21518	0.0329681	7.2628e-07	47	0
Q9BQG0	MYBBP1A	Myb-binding protein 1A	1.21478	0.0387064	1.24317e-05	47	0
P09012	SNRPA	U1 small nuclear ribonucleoprotein A	1.2147	0.0361588	4.02246e-06	47	0
Q8TDD1	DDX54	ATP-dependent RNA helicase DDX54	1.21443	0.102513	0.0204504	28	40
P43490	NAMPT	Nicotinamide phosphoribosyltransferase	1.21378	0.036859	5.92967e-06	47	0
Q9BTV4	TMEM43	Transmembrane protein 43	1.21358	0.0349753	2.46605e-06	47	0
P35637	FUS	RNA-binding protein FUS	1.21347	0.0462178	4.71222e-06	29	38
Q12874	SF3A3	Splicing factor 3A subunit 3	1.21341	0.0322765	5.60037e-07	47	0
O00571	DDX3X	ATP-dependent RNA helicase DDX3X	1.21327	0.0171754	8.23065e-14	47	0
P30626	SRI	Sorcin	1.21294	0.03314	9.65402e-07	47	0
Q92552	MRPS27	28S ribosomal protein S27, mitochondrial	1.21191	0.0272328	1.81896e-08	47	0
Q9P2T1	GMPR2	GMP reductase 2	1.21166	0.0492074	1.51038e-05	29	38
O60613	SELENOF	Selenoprotein F	1.21165	0.0399826	2.54726e-05	47	0
Q86UE8	TLK2	Serine/threonine-protein kinase tousled-like 2	1.21111	0.0658935	2.5401e-06	13	72
Q9UIQ6	LNPEP	Leucyl-cystinyl aminopeptidase	1.20964	0.0306953	2.90521e-07	47	0
O15143	ARPC1B	Actin-related protein 2/3 complex subunit 1B	1.20948	0.0387287	1.8048e-05	47	0
Q8NCW5	NAXE	NAD(P)H-hydrate epimerase	1.20891	0.0435614	0.000103586	47	0
Q13563	PKD2	Polycystin-2	1.2088	0.0540328	0.000249102	35	26
Q96I24	FUBP3	Far upstream element-binding protein 3	1.20879	0.0546955	0.000242502	34	28
Q92506	HSD17B8	Estradiol 17-beta-dehydrogenase 8	1.20834	0.0393422	2.49166e-05	47	0
Q9HC38	GLOD4	Glyoxalase domain-containing protein 4	1.20826	0.0186756	1.81168e-12	47	0
P29590	PML	Protein PML	1.20781	0.0430077	9.31171e-05	47	0
P48643	CCT5	T-complex protein 1 subunit epsilon	1.20717	0.0259982	1.02994e-08	47	0
Q4VC31	CCDC58	Coiled-coil domain-containing protein 58	1.20709	0.0421613	5.53279e-07	26	45
P27708	CAD	CAD protein	1.20684	0.0191376	4.27371e-12	47	0
O60547	GMDS	GDP-mannose 4,6 dehydratase	1.20674	0.0444194	0.000131751	46	2
P11142	HSPA8	Heat shock cognate 71 kDa protein	1.2067	0.0172446	2.3321e-13	47	0
Q05397	PTK2	Focal adhesion kinase 1	1.20484	0.0493508	8.01728e-05	34	28
O75694	NUP155	Nuclear pore complex protein Nup155	1.20476	0.0198349	1.52758e-11	47	0
Q8NFV4	ABHD11	Protein ABHD11	1.20466	0.0558958	4.01474e-07	14	70
Q9Y303	AMDHD2	N-acetylglucosamine-6-phosphate deacetylase	1.20451	0.0328466	1.66139e-06	47	0
Q6PCB7	SLC27A1	Long-chain fatty acid transport protein 1	1.20438	0.0360598	8.27435e-06	47	0
P23588	EIF4B	Eukaryotic translation initiation factor 4B	1.2043	0.0473681	0.000382622	47	0
P43487	RANBP1	Ran-specific GTPase-activating protein	1.20407	0.0388298	6.13807e-06	39	17
Q00535	CDK5	Cyclin-dependent-like kinase 5	1.20396	0.0620789	5.37426e-06	15	68
P55899	FCGRT	IgG receptor FcRn large subunit p51	1.20388	0.0424622	8.36435e-07	26	45
Q7Z7L8	C11orf96	Uncharacterized protein C11orf96	1.20357	0.102604	9.73723e-05	8	83
Q9NZL9	MAT2B	Methionine adenosyltransferase 2 subunit beta	1.20276	0.0227119	2.16785e-10	43	9
Q5VW32	BROX	BRO1 domain-containing protein BROX	1.20272	0.0365774	1.18791e-05	47	0
O95834	EML2	Echinoderm microtubule-associated protein-like 2	1.20271	0.0263124	2.15518e-08	47	0
Q765P7	MTSS2	Protein MTSS 2	1.20239	0.0377815	2.02942e-05	47	0
O60518	RANBP6	Ran-binding protein 6	1.20192	0.0316607	6.63555e-10	24	49
Q96NB2	SFXN2	Sideroflexin-2	1.20189	0.04896	1.92847e-06	21	55
A5D8V6	VPS37C	Vacuolar protein sorting-associated protein 37C	1.20177	0.0428263	4.97507e-05	41	13
Q00577	PURA	Transcriptional activator protein Pur-alpha	1.20172	0.0326813	1.91209e-06	47	0
Q9NPQ8	RIC8A	Synembryn-A	1.20171	0.067773	0.0109682	47	0
P51572	BCAP31	B-cell receptor-associated protein 31	1.20153	0.0328253	2.10126e-06	47	0
P50995	ANXA11	Annexin A11	1.20147	0.024692	5.79904e-09	47	0
P53582	METAP1	Methionine aminopeptidase 1	1.20145	0.0327689	3.51141e-07	39	17
Q8N201	INTS1	Integrator complex subunit 1	1.20135	0.0375815	6.08877e-08	25	47
P55263	ADK	Adenosine kinase	1.20132	0.0378229	2.23699e-05	47	0
P11310	ACADM	Medium-chain specific acyl-CoA dehydrogenase, mitochondrial	1.20116	0.0353048	7.45148e-06	47	0
Q9BV79	MECR	Enoyl-[acyl-carrier-protein] reductase, mitochondrial	1.20106	0.047221	1.06321e-06	21	55
Q8TAQ2	SMARCC2	SWI/SNF complex subunit SMARCC2	1.2005	0.039693	4.84599e-05	47	0
P12081	HARS1	Histidine--tRNA ligase, cytoplasmic	1.19991	0.0328625	2.45129e-06	47	0
Q6NUK1	SLC25A24	Calcium-binding mitochondrial carrier protein SCaMC-1	1.19929	0.0226287	9.14449e-10	47	0
Q71DI3	H3C15	Histone H3.2	1.19892	0.144072	0.000464677	5	89
Q9Y6M1	IGF2BP2	Insulin-like growth factor 2 mRNA-binding protein 2	1.19851	0.0573179	0.00255966	44	6
P47914	RPL29	60S ribosomal protein L29	1.19805	0.0681478	5.84422e-05	16	66
O60568	PLOD3	Multifunctional procollagen lysine hydroxylase and glycosyltransferase LH3	1.19751	0.0380052	3.13854e-05	47	0
O43583	DENR	Density-regulated protein	1.19745	0.0685393	3.49662e-06	11	77
Q92945	KHSRP	Far upstream element-binding protein 2	1.19685	0.0430998	0.000184692	47	0
P46776	RPL27A	60S ribosomal protein L27a	1.19668	0.0352052	1.00933e-05	47	0
P21964	COMT	Catechol O-methyltransferase	1.19659	0.0530237	0.00182844	47	0
Q16698	DECR1	2,4-dienoyl-CoA reductase, mitochondrial	1.19653	0.0341365	6.12218e-06	47	0
Q00325	SLC25A3	Phosphate carrier protein, mitochondrial	1.19647	0.0202617	7.88922e-11	47	0
Q8WVY7	UBLCP1	Ubiquitin-like domain-containing CTD phosphatase 1	1.19643	0.0380903	2.98367e-05	46	2
Q5JTZ9	AARS2	Alanine--tRNA ligase, mitochondrial	1.19638	0.0391772	4.13791e-06	34	28
P49590	HARS2	Histidine--tRNA ligase, mitochondrial	1.19629	0.0389852	4.25517e-05	46	2
Q5R3I4	TTC38	Tetratricopeptide repeat protein 38	1.19416	0.0458638	5.27694e-06	25	47
Q12906	ILF3	Interleukin enhancer-binding factor 3	1.19395	0.0182408	6.7325e-12	47	0
Q9Y4I1	MYO5A	Unconventional myosin-Va	1.19349	0.0344528	9.11099e-06	47	0
Q9P0J1	PDP1	[Pyruvate dehydrogenase [acetyl-transferring]]-phosphatase 1, mitochondrial	1.19291	0.0329403	4.52676e-06	47	0
Q02338	BDH1	D-beta-hydroxybutyrate dehydrogenase, mitochondrial	1.19285	0.0558039	0.00255966	44	6
Q9NR31	SAR1A	GTP-binding protein SAR1a	1.19251	0.0257802	4.1051e-08	47	0
Q9NTZ6	RBM12	RNA-binding protein 12	1.19223	0.0204426	5.46481e-11	43	9
P30519	HMOX2	Heme oxygenase 2	1.19215	0.0263463	2.40922e-09	35	26
P35270	SPR	Sepiapterin reductase	1.19196	0.0291593	5.42689e-07	47	0
Q9BT73	PSMG3	Proteasome assembly chaperone 3	1.19134	0.0871717	7.3069e-06	7	85
O75828	CBR3	Carbonyl reductase [NADPH] 3	1.19133	0.046432	0.000367242	43	9
Q9NXF1	TEX10	Testis-expressed protein 10	1.19114	0.0529097	0.00229276	47	0
Q9ULZ3	PYCARD	Apoptosis-associated speck-like protein containing a CARD	1.19078	0.0424042	0.000123122	43	9
P78371	CCT2	T-complex protein 1 subunit beta	1.19076	0.0192105	4.21802e-11	47	0
P16930	FAH	Fumarylacetoacetase	1.19059	0.0402869	0.000113899	47	0
Q9Y5M8	SRPRB	Signal recognition particle receptor subunit beta	1.19057	0.0347842	1.34387e-05	47	0
P41252	IARS1	Isoleucine--tRNA ligase, cytoplasmic	1.19012	0.0208563	3.81493e-10	47	0
Q86VN1	VPS36	Vacuolar protein-sorting-associated protein 36	1.18968	0.0234661	2.39836e-09	43	9
P98196	ATP11A	Probable phospholipid-transporting ATPase IH	1.18878	0.0809011	7.90535e-06	8	83
Q03701	CEBPZ	CCAAT/enhancer-binding protein zeta	1.18838	0.0436059	2.68323e-05	32	32
Q8IZQ5	SELENOH	Selenoprotein H	1.18815	0.10523	0.00114182	10	79
Q14738	PPP2R5D	Serine/threonine-protein phosphatase 2A 56 kDa regulatory subunit delta isoform	1.18785	0.0263259	1.05692e-07	47	0
Q9BX79	STRA6	Receptor for retinol uptake STRA6	1.1875	0.0557957	4.87565e-05	21	55
Q12929	EPS8	Epidermal growth factor receptor kinase substrate 8	1.18722	0.0466574	0.000795391	47	0
Q9Y6K5	OAS3	2~-5~-oligoadenylate synthase 3	1.1872	0.0747957	0.00922899	32	32
Q13459	MYO9B	Unconventional myosin-IXb	1.18697	0.041827	0.000202432	46	2
P23919	DTYMK	Thymidylate kinase	1.18642	0.0301283	7.38157e-07	43	9
Q92643	PIGK	GPI-anchor transamidase	1.18638	0.0425138	4.16624e-05	35	26
P10515	DLAT	Dihydrolipoyllysine-residue acetyltransferase component of pyruvate dehydrogenase complex, mitochondrial	1.18629	0.0266504	1.60587e-07	47	0
Q5HYK3	COQ5	2-methoxy-6-polyprenyl-1,4-benzoquinol methylase, mitochondrial	1.18529	0.0460634	0.000474201	43	9
Q14320	FAM50A	Protein FAM50A	1.18514	0.062388	8.835e-08	8	83
P0C0S5	H2AZ1	Histone H2A.Z	1.1845	0.0526281	0.00294154	47	0
P16070	CD44	CD44 antigen	1.18449	0.0459518	0.000783024	47	0
Q9BX66	SORBS1	Sorbin and SH3 domain-containing protein 1	1.18431	0.0405835	0.000187671	47	0
P0DI81	TRAPPC2	Trafficking protein particle complex subunit 2	1.18398	0.0472485	4.76023e-08	13	72
Q8N3C0	ASCC3	Activating signal cointegrator 1 complex subunit 3	1.18385	0.0336749	6.61888e-06	43	9
Q8N4Q0	ZADH2	Prostaglandin reductase 3	1.18384	0.0802221	3.43703e-06	7	85
Q8TCD5	NT5C	5~(3~)-deoxyribonucleotidase, cytosolic type	1.1836	0.0340616	1.67576e-05	47	0
Q9H0C8	ILKAP	Integrin-linked kinase-associated serine/threonine phosphatase 2C	1.18356	0.0431358	0.000209343	42	11
Q96HW7	INTS4	Integrator complex subunit 4	1.18278	0.0583471	2.84421e-07	10	79
Q92888	ARHGEF1	Rho guanine nucleotide exchange factor 1	1.18212	0.0227857	6.77299e-09	46	2
P55795	HNRNPH2	Heterogeneous nuclear ribonucleoprotein H2	1.18207	0.0270803	3.44801e-07	47	0
P84103	SRSF3	Serine/arginine-rich splicing factor 3	1.182	0.0496469	0.000244517	32	32
P17661	DES	Desmin	1.18146	0.0913407	0.00597728	18	62
Q9NX46	ADPRS	ADP-ribose glycohydrolase ARH3	1.18142	0.0375009	8.10204e-05	47	0
O15533	TAPBP	Tapasin	1.18137	0.0926917	0.0358204	31	34
Q5JTH9	RRP12	RRP12-like protein	1.1811	0.0336132	1.66876e-05	47	0
Q8IY81	FTSJ3	pre-rRNA 2~-O-ribose RNA methyltransferase FTSJ3	1.18071	0.0385623	0.000123603	47	0
O75208	COQ9	Ubiquinone biosynthesis protein COQ9, mitochondrial	1.17996	0.0568072	0.000106319	21	55
Q8WWC4	MAIP1	m-AAA protease-interacting protein 1, mitochondrial	1.17949	0.0606278	6.32146e-05	17	64
Q6UWU2	GLB1L	Beta-galactosidase-1-like protein	1.17927	0.0677123	0.000122828	15	68
Q96EY1	DNAJA3	DnaJ homolog subfamily A member 3, mitochondrial	1.17871	0.0355923	2.469e-05	43	9
O14841	OPLAH	5-oxoprolinase	1.17848	0.0505404	0.00269976	47	0
Q02818	NUCB1	Nucleobindin-1	1.17837	0.0230992	1.86292e-08	47	0
Q8TBF2	PRXL2B	Prostamide/prostaglandin F synthase	1.17705	0.0673559	0.00625294	32	32
P25786	PSMA1	Proteasome subunit alpha type-1	1.17695	0.0133074	1.38011e-14	47	0
Q9BXJ9	NAA15	N-alpha-acetyltransferase 15, NatA auxiliary subunit	1.17619	0.0514929	0.00352639	47	0
Q8IV08	PLD3	5~-3~ exonuclease PLD3	1.17615	0.0678657	0.0239697	47	0
P50213	IDH3A	Isocitrate dehydrogenase [NAD] subunit alpha, mitochondrial	1.17614	0.0263744	3.82938e-07	47	0
P34949	MPI	Mannose-6-phosphate isomerase	1.17586	0.0312434	8.06311e-06	47	0
Q13404	UBE2V1	Ubiquitin-conjugating enzyme E2 variant 1	1.17494	0.0243188	5.02195e-10	30	36
P49585	PCYT1A	Choline-phosphate cytidylyltransferase A	1.17438	0.071998	2.84952e-07	6	87
P28070	PSMB4	Proteasome subunit beta type-4	1.1741	0.0232023	3.44449e-08	47	0
Q5QNW6	H2BC18	Histone H2B type 2-F	1.17405	0.0616868	3.04371e-05	14	70
Q9BZE1	MRPL37	39S ribosomal protein L37, mitochondrial	1.17387	0.0603406	0.000184625	19	60
Q9BUJ2	HNRNPUL1	Heterogeneous nuclear ribonucleoprotein U-like protein 1	1.17325	0.0388221	0.000223471	47	0
Q99459	CDC5L	Cell division cycle 5-like protein	1.17317	0.0571394	0.00278646	35	26
P05198	EIF2S1	Eukaryotic translation initiation factor 2 subunit 1	1.17317	0.0240212	8.05029e-08	47	0
Q9NQ29	LUC7L	Putative RNA-binding protein Luc7-like 1	1.17282	0.0333818	2.86124e-08	22	53
P14678	SNRPB	Small nuclear ribonucleoprotein-associated proteins B and B~	1.17266	0.0346284	5.12877e-05	47	0
Q96DC8	ECHDC3	Enoyl-CoA hydratase domain-containing protein 3, mitochondrial	1.17214	0.0741582	0.000154196	12	74
P54725	RAD23A	UV excision repair protein RAD23 homolog A	1.17192	0.0181985	1.54187e-10	47	0
O95433	AHSA1	Activator of 90 kDa heat shock protein ATPase homolog 1	1.17175	0.0271492	1.0535e-06	47	0
Q8WVJ2	NUDCD2	NudC domain-containing protein 2	1.17125	0.0488239	0.000176583	28	40
Q9UNK0	STX8	Syntaxin-8	1.17123	0.0311316	1.15387e-05	47	0
Q96JH7	VCPIP1	Deubiquitinating protein VCIP135	1.17115	0.0511857	7.12215e-08	10	79
Q9Y4F1	FARP1	FERM, ARHGEF and pleckstrin domain-containing protein 1	1.17104	0.0360847	0.000102139	47	0
Q9HA65	TBC1D17	TBC1 domain family member 17	1.17081	0.0641205	0.000342	18	62
P42226	STAT6	Signal transducer and activator of transcription 6	1.17079	0.0434772	0.000581741	43	9
Q9NT62	ATG3	Ubiquitin-like-conjugating enzyme ATG3	1.17061	0.0305575	1.87513e-06	39	17
Q96PY5	FMNL2	Formin-like protein 2	1.17037	0.0353616	8.16611e-05	47	0
Q13263	TRIM28	Transcription intermediary factor 1-beta	1.16991	0.0283929	2.83333e-06	47	0
Q9Y4Z0	LSM4	U6 snRNA-associated Sm-like protein LSm4	1.16949	0.0368739	3.0905e-06	28	40
Q9Y624	F11R	Junctional adhesion molecule A	1.16938	0.0398185	0.00014552	40	15
O00483	NDUFA4	Cytochrome c oxidase subunit NDUFA4	1.16892	0.0480286	0.00271192	47	0
Q96R05	RBP7	Retinoid-binding protein 7	1.16854	0.080047	1.29865e-05	7	85
Q9H6K4	OPA3	Optic atrophy 3 protein	1.1681	0.03258	1.55157e-05	43	9
P62495	ETF1	Eukaryotic peptide chain release factor subunit 1	1.1681	0.0246509	2.47226e-07	47	0
O60841	EIF5B	Eukaryotic translation initiation factor 5B	1.16779	0.0440657	0.00127196	47	0
O95989	NUDT3	Diphosphoinositol polyphosphate phosphohydrolase 1	1.16778	0.0655917	0.00152496	22	53
P12830	CDH1	Cadherin-1	1.16775	0.0504665	0.00436228	47	0
Q9Y2R9	MRPS7	28S ribosomal protein S7, mitochondrial	1.16721	0.0360568	1.87081e-08	17	64
Q8TCS8	PNPT1	Polyribonucleotide nucleotidyltransferase 1, mitochondrial	1.16695	0.0404542	0.00054413	47	0
P55084	HADHB	Trifunctional enzyme subunit beta, mitochondrial	1.16694	0.0271381	1.73466e-06	47	0
P30086	PEBP1	Phosphatidylethanolamine-binding protein 1	1.16691	0.042727	0.000975441	47	0
P61088	UBE2N	Ubiquitin-conjugating enzyme E2 N	1.16675	0.0276461	2.44851e-06	47	0
P12955	PEPD	Xaa-Pro dipeptidase	1.16662	0.0446226	0.00153755	47	0
Q9Y3F4	STRAP	Serine-threonine kinase receptor-associated protein	1.16648	0.0166532	3.69367e-11	47	0
P60709	ACTB	Actin, cytoplasmic 1	1.16599	0.0289307	3.27677e-06	44	6
Q9BV57	ADI1	1,2-dihydroxy-3-keto-5-methylthiopentene dioxygenase	1.16562	0.0687936	0.00101354	18	62
P23193	TCEA1	Transcription elongation factor A protein 1	1.16541	0.0393749	0.000196126	41	13
P07305	H1-0	Histone H1.0	1.16536	0.112252	0.193275	47	0
Q92597	NDRG1	Protein NDRG1	1.16516	0.0627765	0.0216412	47	0
Q9NYY8	FASTKD2	FAST kinase domain-containing protein 2, mitochondrial	1.16513	0.0538709	0.000111909	20	57
P50991	CCT4	T-complex protein 1 subunit delta	1.16488	0.0267537	1.6638e-06	47	0
O75306	NDUFS2	NADH dehydrogenase [ubiquinone] iron-sulfur protein 2, mitochondrial	1.16484	0.0293082	7.80287e-06	47	0
P19525	EIF2AK2	Interferon-induced, double-stranded RNA-activated protein kinase	1.16467	0.0612156	0.00569506	33	30
O96019	ACTL6A	Actin-like protein 6A	1.16459	0.0501729	0.000385848	28	40
P50395	GDI2	Rab GDP dissociation inhibitor beta	1.16443	0.0225192	6.02803e-08	47	0
Q1KMD3	HNRNPUL2	Heterogeneous nuclear ribonucleoprotein U-like protein 2	1.16437	0.038657	0.000384208	47	0
Q9UNP9	PPIE	Peptidyl-prolyl cis-trans isomerase E	1.16422	0.0469972	2.73575e-06	16	66
Q9UMS4	PRPF19	Pre-mRNA-processing factor 19	1.16412	0.0264318	1.44737e-06	47	0
Q96RF0	SNX18	Sorting nexin-18	1.16403	0.0485192	7.59441e-07	13	72
Q16543	CDC37	Hsp90 co-chaperone Cdc37	1.16332	0.0268141	2.03663e-06	47	0
Q13868	EXOSC2	Exosome complex component RRP4	1.16294	0.0551314	8.95694e-05	18	62
P09429	HMGB1	High mobility group protein B1	1.16285	0.0498264	0.00491669	47	0
Q9NSE4	IARS2	Isoleucine--tRNA ligase, mitochondrial	1.16277	0.0272045	2.76643e-06	47	0
Q9UPN7	PPP6R1	Serine/threonine-protein phosphatase 6 regulatory subunit 1	1.16275	0.0803417	0.000260881	10	79
O75489	NDUFS3	NADH dehydrogenase [ubiquinone] iron-sulfur protein 3, mitochondrial	1.16269	0.026884	2.2799e-06	47	0
Q13523	PRPF4B	Serine/threonine-protein kinase PRP4 homolog	1.16264	0.03417	5.06976e-05	43	9
Q12769	NUP160	Nuclear pore complex protein Nup160	1.16253	0.0240592	2.93178e-07	47	0
Q16531	DDB1	DNA damage-binding protein 1	1.16238	0.0184571	8.96857e-10	47	0
Q15286	RAB35	Ras-related protein Rab-35	1.16234	0.024474	4.15517e-07	47	0
Q96IJ6	GMPPA	Mannose-1-phosphate guanyltransferase alpha	1.16222	0.0612386	0.000172274	16	66
Q9UPZ3	HPS5	Hermansky-Pudlak syndrome 5 protein	1.16221	0.0507776	1.7037e-08	8	83
O00299	CLIC1	Chloride intracellular channel protein 1	1.16198	0.0389824	0.000496067	47	0
O15226	NKRF	NF-kappa-B-repressing factor	1.16196	0.0672309	4.16099e-06	8	83
Q06323	PSME1	Proteasome activator complex subunit 1	1.1615	0.0332585	7.10006e-05	47	0
P49356	FNTB	Protein farnesyltransferase subunit beta	1.16114	0.0716824	1.288e-05	8	83
Q99798	ACO2	Aconitate hydratase, mitochondrial	1.16114	0.0283577	6.48854e-06	47	0
Q15050	RRS1	Ribosome biogenesis regulatory protein homolog	1.16103	0.0607797	7.11338e-05	14	70
Q8WX92	NELFB	Negative elongation factor B	1.16055	0.0440589	0.00123299	43	9
P41240	CSK	Tyrosine-protein kinase CSK	1.1604	0.0272067	2.4386e-06	45	4
P40925	MDH1	Malate dehydrogenase, cytoplasmic	1.16035	0.0239478	3.46657e-07	47	0
O60762	DPM1	Dolichol-phosphate mannosyltransferase subunit 1	1.16019	0.0384974	0.000485747	47	0
Q9NYK5	MRPL39	39S ribosomal protein L39, mitochondrial	1.16005	0.0481281	0.00322618	44	6
Q14137	BOP1	Ribosome biogenesis protein BOP1	1.1599	0.073749	0.00157457	16	66
Q8IYM9	TRIM22	E3 ubiquitin-protein ligase TRIM22	1.15988	0.0428489	5.81041e-06	20	57
Q16655	MLANA	Melanoma antigen recognized by T-cells 1	1.15978	0.0524101	3.83582e-05	17	64
P61086	UBE2K	Ubiquitin-conjugating enzyme E2 K	1.15928	0.0213676	3.8671e-08	47	0
Q8N6R0	EEF1AKNMT	eEF1A lysine and N-terminal methyltransferase	1.15902	0.0537368	3.71209e-09	6	87
Q9BWS9	CHID1	Chitinase domain-containing protein 1	1.15863	0.0222689	9.97816e-08	47	0
Q9UDW1	UQCR10	Cytochrome b-c1 complex subunit 9	1.15798	0.0665708	0.00296224	22	53
Q16719	KYNU	Kynureninase	1.1578	0.120343	0.178183	35	26
P63279	UBE2I	SUMO-conjugating enzyme UBC9	1.15778	0.0407137	8.87682e-05	31	34
Q92947	GCDH	Glutaryl-CoA dehydrogenase, mitochondrial	1.15762	0.0325245	7.17968e-05	47	0
Q9Y2R5	MRPS17	28S ribosomal protein S17, mitochondrial	1.15744	0.100215	0.00217139	9	81
P82932	MRPS6	28S ribosomal protein S6, mitochondrial	1.15738	0.0516882	1.1182e-08	7	85
Q9H6R4	NOL6	Nucleolar protein 6	1.15712	0.0424058	0.000393087	36	23
P21283	ATP6V1C1	V-type proton ATPase subunit C 1	1.15652	0.0268716	4.2623e-06	47	0
Q96SI9	STRBP	Spermatid perinuclear RNA-binding protein	1.15647	0.0825505	1.91661e-05	6	87
Q9H479	FN3K	Fructosamine-3-kinase	1.15641	0.0527049	0.00601243	41	13
P49711	CTCF	Transcriptional repressor CTCF	1.15631	0.0802157	0.000101178	8	83
Q9BUN8	DERL1	Derlin-1	1.15616	0.0495143	0.000306658	25	47
Q9Y5B9	SUPT16H	FACT complex subunit SPT16	1.15603	0.0290541	1.59053e-05	47	0
O43237	DYNC1LI2	Cytoplasmic dynein 1 light intermediate chain 2	1.15542	0.0358119	0.000293637	47	0
O95602	POLR1A	DNA-directed RNA polymerase I subunit RPA1	1.15484	0.0808451	0.000125914	8	83
P49720	PSMB3	Proteasome subunit beta type-3	1.15452	0.0188831	4.96011e-09	47	0
Q7L2E3	DHX30	ATP-dependent RNA helicase DHX30	1.15393	0.0312479	5.66135e-05	47	0
P63092	GNAS	Guanine nucleotide-binding protein G(s) subunit alpha isoforms short	1.15367	0.0321033	8.37417e-05	47	0
Q01130	SRSF2	Serine/arginine-rich splicing factor 2	1.15345	0.0352013	0.000159112	43	9
P37198	NUP62	Nuclear pore glycoprotein p62	1.15268	0.0382192	0.000736586	47	0
Q9Y2Q3	GSTK1	Glutathione S-transferase kappa 1	1.15266	0.0464081	0.00453554	47	0
Q2TAY7	SMU1	WD40 repeat-containing protein SMU1	1.15264	0.02503	1.92818e-06	47	0
Q7L0Y3	TRMT10C	tRNA methyltransferase 10 homolog C	1.15225	0.0397605	0.00022162	35	26
P68036	UBE2L3	Ubiquitin-conjugating enzyme E2 L3	1.15185	0.024219	8.70768e-09	29	38
Q8N6M0	OTUD6B	Deubiquitinase OTUD6B	1.15183	0.0696376	2.00525e-05	8	83
Q14696	MESD	LRP chaperone MESD	1.15176	0.0323308	5.02203e-05	42	11
Q8WTT2	NOC3L	Nucleolar complex protein 3 homolog	1.15173	0.0548589	0.00152419	26	45
P30085	CMPK1	UMP-CMP kinase	1.15172	0.0500545	0.00840591	47	0
O43143	DHX15	Pre-mRNA-splicing factor ATP-dependent RNA helicase DHX15	1.15139	0.0181973	3.41332e-09	47	0
Q96DV4	MRPL38	39S ribosomal protein L38, mitochondrial	1.15134	0.0626303	8.41222e-05	12	74
Q96EL2	MRPS24	28S ribosomal protein S24, mitochondrial	1.15098	0.0617805	3.18734e-06	8	83
O75223	GGCT	Gamma-glutamylcyclotransferase	1.15086	0.0488061	0.000231858	23	51
Q9Y394	DHRS7	Dehydrogenase/reductase SDR family member 7	1.15076	0.0378842	0.00076219	47	0
P07237	P4HB	Protein disulfide-isomerase	1.15051	0.0330726	0.000160372	47	0
P22695	UQCRC2	Cytochrome b-c1 complex subunit 2, mitochondrial	1.15041	0.0451028	0.00403327	47	0
Q9Y243	AKT3	RAC-gamma serine/threonine-protein kinase	1.15032	0.0754895	8.61725e-06	6	87
Q15691	MAPRE1	Microtubule-associated protein RP/EB family member 1	1.15025	0.0367104	0.000562469	47	0
P27694	RPA1	Replication protein A 70 kDa DNA-binding subunit	1.15018	0.0291902	2.98341e-05	47	0
P41567	EIF1	Eukaryotic translation initiation factor 1	1.15017	0.0625442	0.0341996	47	0
Q9Y2X3	NOP58	Nucleolar protein 58	1.15013	0.0357232	0.000418195	47	0
Q9UHL4	DPP7	Dipeptidyl peptidase 2	1.15013	0.049065	0.00782209	47	0
P42704	LRPPRC	Leucine-rich PPR motif-containing protein, mitochondrial	1.15011	0.0385839	0.000961037	47	0
Q9Y2D5	AKAP2	A-kinase anchor protein 2	1.14961	0.0710227	1.20442e-05	7	85
Q2M389	WASHC4	WASH complex subunit 4	1.14901	0.0318061	0.000109887	47	0
P52948	NUP98	Nuclear pore complex protein Nup98-Nup96	1.14892	0.0254233	1.78009e-06	43	9
O75312	ZPR1	Zinc finger protein ZPR1	1.14887	0.0545851	4.31764e-07	8	83
P08473	MME	Neprilysin	1.14848	0.10892	0.0277834	14	70
P55854	SUMO3	Small ubiquitin-related modifier 3	1.14842	0.0697623	1.02356e-05	7	85
Q96KP4	CNDP2	Cytosolic non-specific dipeptidase	1.14726	0.0334453	0.000239229	47	0
O75027	ABCB7	ATP-binding cassette sub-family B member 7, mitochondrial	1.14723	0.0539856	0.00205951	27	43
Q8N5M1	ATPAF2	ATP synthase mitochondrial F1 complex assembly factor 2	1.14719	0.0529977	0.00281228	30	36
P15927	RPA2	Replication protein A 32 kDa subunit	1.14701	0.0618812	5.02816e-06	8	83
Q6PKG0	LARP1	La-related protein 1	1.14675	0.0337575	0.000160944	43	9
P49721	PSMB2	Proteasome subunit beta type-2	1.14672	0.026526	9.64701e-06	47	0
Q8NBN3	TMEM87A	Transmembrane protein 87A	1.14659	0.0422112	0.00210383	44	6
P07954	FH	Fumarate hydratase, mitochondrial	1.14638	0.0260373	7.4093e-06	47	0
Q14232	EIF2B1	Translation initiation factor eIF-2B subunit alpha	1.14606	0.0289712	2.44246e-05	44	6
P78527	PRKDC	DNA-dependent protein kinase catalytic subunit	1.14604	0.0236426	1.51917e-06	47	0
Q9Y2Z0	SUGT1	Protein SGT1 homolog	1.14598	0.0399656	5.75756e-05	26	45
O43707	ACTN4	Alpha-actinin-4	1.14575	0.0290706	4.28968e-05	47	0
P18858	LIG1	DNA ligase 1	1.14562	0.0479454	0.00165011	32	32
Q86X55	CARM1	Histone-arginine methyltransferase CARM1	1.14561	0.0567204	3.8333e-07	7	85
Q01831	XPC	DNA repair protein complementing XP-C cells	1.14559	0.079443	0.000428781	9	81
Q96GQ7	DDX27	Probable ATP-dependent RNA helicase DDX27	1.14523	0.0753711	0.000112917	8	83
Q92785	DPF2	Zinc finger protein ubi-d4	1.14482	0.0545627	2.15789e-05	12	74
Q9NR28	DIABLO	Diablo homolog, mitochondrial	1.14482	0.0256225	6.74723e-06	47	0
P51531	SMARCA2	Probable global transcription activator SNF2L2	1.14479	0.0369518	9.65402e-07	18	62
Q9UL03	INTS6	Integrator complex subunit 6	1.14467	0.0503693	1.30867e-06	10	79
P38117	ETFB	Electron transfer flavoprotein subunit beta	1.14466	0.0336611	0.000317591	47	0
Q9H0U6	MRPL18	39S ribosomal protein L18, mitochondrial	1.14459	0.0449915	0.00010454	22	53
Q06136	KDSR	3-ketodihydrosphingosine reductase	1.14458	0.0360837	0.000145789	36	23
Q96RS6	NUDCD1	NudC domain-containing protein 1	1.14452	0.052875	0.00596993	35	26
P37840	SNCA	Alpha-synuclein	1.14404	0.0832035	0.0788478	36	23
Q16630	CPSF6	Cleavage and polyadenylation specificity factor subunit 6	1.14375	0.0272541	2.01744e-05	47	0
P49023	PXN	Paxillin	1.14338	0.0696089	4.52879e-05	8	83
P54136	RARS1	Arginine--tRNA ligase, cytoplasmic	1.14326	0.0216176	4.11064e-07	47	0
Q9BZE9	ASPSCR1	Tether containing UBX domain for GLUT4	1.14269	0.0302613	4.57995e-05	42	11
Q9NP81	SARS2	Serine--tRNA ligase, mitochondrial	1.14259	0.036346	0.000863039	47	0
Q0VDF9	HSPA14	Heat shock 70 kDa protein 14	1.14245	0.0432773	0.000221701	26	45
Q9UBQ0	VPS29	Vacuolar protein sorting-associated protein 29	1.14231	0.0149747	1.58459e-10	47	0
P03891	MT-ND2	NADH-ubiquinone oxidoreductase chain 2	1.14179	0.0798039	4.76991e-05	6	87
Q99714	HSD17B10	3-hydroxyacyl-CoA dehydrogenase type-2	1.14163	0.0263067	1.46337e-05	47	0
O95777	LSM8	U6 snRNA-associated Sm-like protein LSm8	1.1414	0.0345321	0.000544118	47	0
Q14161	GIT2	ARF GTPase-activating protein GIT2	1.14091	0.0414527	0.000186836	27	43
Q9NX40	OCIAD1	OCIA domain-containing protein 1	1.14057	0.0499143	0.00100742	25	47
O00232	PSMD12	26S proteasome non-ATPase regulatory subunit 12	1.14041	0.0178353	1.22343e-08	47	0
Q5SNT2	TMEM201	Transmembrane protein 201	1.14035	0.0555172	4.6978e-06	9	81
Q9Y5K6	CD2AP	CD2-associated protein	1.14001	0.0775341	0.0201094	22	53
Q6PGP7	TTC37	Tetratricopeptide repeat protein 37	1.13961	0.0350481	0.00072878	47	0
O15067	PFAS	Phosphoribosylformylglycinamidine synthase	1.13939	0.0218413	8.2988e-07	47	0
Q96EC8	YIPF6	Protein YIPF6	1.13924	0.0364263	8.95776e-07	17	64
P27987	ITPKB	Inositol-trisphosphate 3-kinase B	1.13912	0.087578	0.000511184	7	85
Q13867	BLMH	Bleomycin hydrolase	1.13902	0.0325575	0.000196706	43	9
P20702	ITGAX	Integrin alpha-X	1.13875	0.107239	0.00970278	9	81
P49406	MRPL19	39S ribosomal protein L19, mitochondrial	1.13871	0.0380751	0.00115139	43	9
O43818	RRP9	U3 small nucleolar RNA-interacting protein 2	1.13857	0.0390726	0.000519123	35	26
P34896	SHMT1	Serine hydroxymethyltransferase, cytosolic	1.13851	0.03859	0.00205355	47	0
O15511	ARPC5	Actin-related protein 2/3 complex subunit 5	1.13822	0.0314953	0.000212684	46	2
Q9Y512	SAMM50	Sorting and assembly machinery component 50 homolog	1.13657	0.0236698	4.77036e-06	47	0
Q9BQ70	TCF25	Transcription factor 25	1.13642	0.0529436	0.000321277	17	64
P63104	YWHAZ	14-3-3 protein zeta/delta	1.13639	0.0346428	0.000815698	47	0
Q9HCE1	MOV10	Helicase MOV-10	1.1363	0.0347244	8.63406e-05	32	32
Q9NQE9	HINT3	Histidine triad nucleotide-binding protein 3	1.13621	0.0590776	2.68138e-06	7	85
Q5RKV6	EXOSC6	Exosome complex component MTR3	1.13573	0.0515424	5.65463e-06	10	79
Q14692	BMS1	Ribosome biogenesis protein BMS1 homolog	1.13568	0.0460302	0.000924801	27	43
Q9NQW7	XPNPEP1	Xaa-Pro aminopeptidase 1	1.13566	0.0281142	7.11686e-05	47	0
O00203	AP3B1	AP-3 complex subunit beta-1	1.13565	0.0240608	6.91393e-06	47	0
P51812	RPS6KA3	Ribosomal protein S6 kinase alpha-3	1.13546	0.0334305	0.000364509	43	9
Q9P291	ARMCX1	Armadillo repeat-containing X-linked protein 1	1.1354	0.047156	1.16185e-05	13	72
Q8IWA0	WDR75	WD repeat-containing protein 75	1.13505	0.0435975	0.000121427	21	55
Q96MW1	CCDC43	Coiled-coil domain-containing protein 43	1.13494	0.0850817	0.00299069	10	79
P61964	WDR5	WD repeat-containing protein 5	1.1348	0.0391053	3.24204e-06	16	66
O43242	PSMD3	26S proteasome non-ATPase regulatory subunit 3	1.13477	0.0207572	6.07879e-07	47	0
O60313	OPA1	Dynamin-like 120 kDa protein, mitochondrial	1.13463	0.0280168	7.50253e-05	47	0
Q05519	SRSF11	Serine/arginine-rich splicing factor 11	1.13456	0.060131	0.000526141	14	70
Q9UN37	VPS4A	Vacuolar protein sorting-associated protein 4A	1.13448	0.0492634	3.1555e-06	10	79
A0A1B0GUS4	UBE2L5	Ubiquitin-conjugating enzyme E2 L5	1.13437	0.0321158	2.84722e-07	18	62
Q86U42	PABPN1	Polyadenylate-binding protein 2	1.13365	0.0559034	0.000528485	16	66
P41091	EIF2S3	Eukaryotic translation initiation factor 2 subunit 3	1.13365	0.0414081	1.45659e-08	8	83
Q15393	SF3B3	Splicing factor 3B subunit 3	1.13349	0.0198544	3.16335e-07	47	0
O43837	IDH3B	Isocitrate dehydrogenase [NAD] subunit beta, mitochondrial	1.133	0.0270248	5.39834e-05	47	0
Q9BWJ5	SF3B5	Splicing factor 3B subunit 5	1.13257	0.0425176	0.000110871	21	55
P23246	SFPQ	Splicing factor, proline- and glutamine-rich	1.13243	0.0245429	1.38838e-05	47	0
O14579	COPE	Coatomer subunit epsilon	1.13221	0.0253536	2.34509e-05	47	0
Q8IWB7	WDFY1	WD repeat and FYVE domain-containing protein 1	1.13205	0.032931	0.000406892	43	9
O75146	HIP1R	Huntingtin-interacting protein 1-related protein	1.13164	0.0440763	1.89628e-05	15	68
Q9UQ13	SHOC2	Leucine-rich repeat protein SHOC-2	1.13137	0.0308068	5.25497e-06	26	45
Q9NV70	EXOC1	Exocyst complex component 1	1.13134	0.0386982	0.0022375	43	9
Q8TB24	RIN3	Ras and Rab interactor 3	1.13117	0.111575	0.004271	6	87
Q96C36	PYCR2	Pyrroline-5-carboxylate reductase 2	1.13107	0.0744336	0.0146562	19	60
O60486	PLXNC1	Plexin-C1	1.13106	0.0539933	0.0311402	47	0
P43155	CRAT	Carnitine O-acetyltransferase	1.13079	0.0435895	0.000179994	21	55
Q15833	STXBP2	Syntaxin-binding protein 2	1.13056	0.0344238	0.00117327	47	0
P63151	PPP2R2A	Serine/threonine-protein phosphatase 2A 55 kDa regulatory subunit B alpha isoform	1.13034	0.0340826	0.00107941	47	0
Q9UI10	EIF2B4	Translation initiation factor eIF-2B subunit delta	1.13026	0.0511992	4.59488e-07	7	85
Q96FJ2	DYNLL2	Dynein light chain 2, cytoplasmic	1.13015	0.0533063	0.00504016	27	43
P09669	COX6C	Cytochrome c oxidase subunit 6C	1.1301	0.0327141	0.000183054	37	21
Q8WXX0	DNAH7	Dynein heavy chain 7, axonemal	1.13003	0.0509814	1.48619e-06	8	83
P18440	NAT1	Arylamine N-acetyltransferase 1	1.12944	0.0614876	0.000433865	12	74
Q9BVC4	MLST8	Target of rapamycin complex subunit LST8	1.12941	0.0914568	0.000754018	6	87
Q9UHV9	PFDN2	Prefoldin subunit 2	1.12934	0.0283206	0.000144358	47	0
Q9BRG1	VPS25	Vacuolar protein-sorting-associated protein 25	1.12907	0.0209653	1.60642e-06	47	0
Q9UHD8	SEPTIN9	Septin-9	1.12907	0.0315736	0.000535801	47	0
Q9NP79	VTA1	Vacuolar protein sorting-associated protein VTA1 homolog	1.1289	0.0497904	0.000946419	21	55
Q9UM22	EPDR1	Mammalian ependymin-related protein 1	1.12866	0.089739	0.00439376	9	81
P10721	KIT	Mast/stem cell growth factor receptor Kit	1.12831	0.0501957	0.00934969	35	26
Q9NUS5	AP5S1	AP-5 complex subunit sigma-1	1.12814	0.0449941	0.000130483	18	62
P46940	IQGAP1	Ras GTPase-activating-like protein IQGAP1	1.1278	0.0388611	0.004252	47	0
P04080	CSTB	Cystatin-B	1.12764	0.0377189	0.00336343	47	0
Q9Y3Z3	SAMHD1	Deoxynucleoside triphosphate triphosphohydrolase SAMHD1	1.1274	0.0453307	0.0132841	47	0
P57088	TMEM33	Transmembrane protein 33	1.12712	0.0460316	0.0102557	42	11
Q6P1L8	MRPL14	39S ribosomal protein L14, mitochondrial	1.12704	0.0402468	5.89527e-09	7	85
Q8ND76	CCNY	Cyclin-Y	1.12699	0.0570576	0.0025017	19	60
Q9UBF8	PI4KB	Phosphatidylinositol 4-kinase beta	1.12677	0.0366113	3.64134e-08	10	79
Q15185	PTGES3	Prostaglandin E synthase 3	1.12661	0.0578769	0.0509873	47	0
P47985	UQCRFS1	Cytochrome b-c1 complex subunit Rieske, mitochondrial	1.12622	0.0477418	0.0193272	47	0
P30101	PDIA3	Protein disulfide-isomerase A3	1.12607	0.0288342	0.000245669	47	0
P18615	NELFE	Negative elongation factor E	1.12604	0.112758	0.00625219	6	87
P49736	MCM2	DNA replication licensing factor MCM2	1.12599	0.0439505	0.000119949	18	62
O94826	TOMM70	Mitochondrial import receptor subunit TOM70	1.12591	0.0454808	0.0145401	47	0
Q15172	PPP2R5A	Serine/threonine-protein phosphatase 2A 56 kDa regulatory subunit alpha isoform	1.12589	0.0565973	0.017177	32	32
Q9HB40	SCPEP1	Retinoid-inducible serine carboxypeptidase	1.12564	0.0614493	0.0374226	36	23
P51580	TPMT	Thiopurine S-methyltransferase	1.12531	0.0513779	0.0139476	36	23
Q9Y2Q9	MRPS28	28S ribosomal protein S28, mitochondrial	1.12509	0.0389454	0.00104132	33	30
O60783	MRPS14	28S ribosomal protein S14, mitochondrial	1.12501	0.0528567	1.75051e-06	7	85
O15514	POLR2D	DNA-directed RNA polymerase II subunit RPB4	1.12497	0.0314761	4.55534e-07	17	64
P26440	IVD	Isovaleryl-CoA dehydrogenase, mitochondrial	1.12496	0.0368769	0.00330482	47	0
Q53H12	AGK	Acylglycerol kinase, mitochondrial	1.1247	0.0496752	0.0258073	47	0
Q9NVP1	DDX18	ATP-dependent RNA helicase DDX18	1.12467	0.0356095	0.00248505	47	0
Q12849	GRSF1	G-rich sequence factor 1	1.12458	0.0497645	0.000135169	14	70
Q96DB5	RMDN1	Regulator of microtubule dynamics protein 1	1.12452	0.0527817	0.0355746	47	0
Q9H9J2	MRPL44	39S ribosomal protein L44, mitochondrial	1.12448	0.0406148	0.00724812	47	0
Q13510	ASAH1	Acid ceramidase	1.12441	0.069811	0.110472	47	0
Q8WZA0	LZIC	Protein LZIC	1.12431	0.0682786	0.0771885	40	15
Q15365	PCBP1	Poly(rC)-binding protein 1	1.12427	0.0536029	0.0387605	47	0
O43852	CALU	Calumenin	1.12405	0.0379967	0.00447127	47	0
Q9Y5Y2	NUBP2	Cytosolic Fe-S cluster assembly factor NUBP2	1.12402	0.0538315	0.00180292	19	60
Q9NRY4	ARHGAP35	Rho GTPase-activating protein 35	1.12401	0.071327	0.000720033	9	81
P30084	ECHS1	Enoyl-CoA hydratase, mitochondrial	1.124	0.0442833	0.013494	47	0
Q92598	HSPH1	Heat shock protein 105 kDa	1.1236	0.0305115	0.000582753	47	0
P53041	PPP5C	Serine/threonine-protein phosphatase 5	1.12352	0.0304279	0.000570466	47	0
Q96ST2	IWS1	Protein IWS1 homolog	1.1235	0.042894	2.87427e-06	11	77
Q3ZCQ8	TIMM50	Mitochondrial import inner membrane translocase subunit TIM50	1.12338	0.0304393	0.000579369	47	0
Q86W50	METTL16	RNA N6-adenosine-methyltransferase METTL16	1.12306	0.0531288	0.00131967	18	62
P49754	VPS41	Vacuolar protein sorting-associated protein 41 homolog	1.12294	0.0572434	0.00337791	19	60
P62191	PSMC1	26S proteasome regulatory subunit 4	1.12286	0.0227172	1.33422e-05	47	0
P50453	SERPINB9	Serpin B9	1.12278	0.0744018	0.138083	47	0
Q13247	SRSF6	Serine/arginine-rich splicing factor 6	1.12256	0.056839	2.24608e-05	8	83
Q86YH6	PDSS2	Decaprenyl-diphosphate synthase subunit 2	1.12216	0.0591376	9.81716e-07	5	89
P24752	ACAT1	Acetyl-CoA acetyltransferase, mitochondrial	1.12211	0.0291704	0.000404863	47	0
Q9BRF8	CPPED1	Serine/threonine-protein phosphatase CPPED1	1.12206	0.0264113	0.000122683	47	0
P62491	RAB11A	Ras-related protein Rab-11A	1.1219	0.049029	0.0269928	47	0
P30049	ATP5F1D	ATP synthase subunit delta, mitochondrial	1.12152	0.0286972	0.000354703	47	0
Q5VTL8	PRPF38B	Pre-mRNA-splicing factor 38B	1.12146	0.0491632	2.60923e-06	8	83
Q969Y2	GTPBP3	tRNA modification GTPase GTPBP3, mitochondrial	1.12134	0.0757168	1.8752e-08	2	96
P62875	POLR2L	DNA-directed RNA polymerases I, II, and III subunit RPABC5	1.1213	0.0605735	2.48763e-05	7	85
O00743	PPP6C	Serine/threonine-protein phosphatase 6 catalytic subunit	1.12104	0.0666697	0.000225322	8	83
O43670	ZNF207	BUB3-interacting and GLEBS motif-containing protein ZNF207	1.12061	0.0488768	0.00453554	27	43
O60287	URB1	Nucleolar pre-ribosomal-associated protein 1	1.12055	0.0545126	0.0246958	36	23
P25098	GRK2	Beta-adrenergic receptor kinase 1	1.12053	0.0580809	0.00157292	15	68
P16403	H1-2	Histone H1.2	1.12049	0.171981	0.0546965	5	89
P33992	MCM5	DNA replication licensing factor MCM5	1.12011	0.0542876	0.0101558	27	43
Q9HB90	RRAGC	Ras-related GTP-binding protein C	1.12001	0.0358794	0.00364257	47	0
Q9BPX5	ARPC5L	Actin-related protein 2/3 complex subunit 5-like protein	1.11995	0.0282771	0.000346944	47	0
Q8TED0	UTP15	U3 small nucleolar RNA-associated protein 15 homolog	1.1198	0.0595935	0.000437615	11	77
Q9NQP4	PFDN4	Prefoldin subunit 4	1.11979	0.0460863	0.000193443	16	66
P13798	APEH	Acylamino-acid-releasing enzyme	1.11972	0.0259382	0.000124029	47	0
P41223	BUD31	Protein BUD31 homolog	1.11946	0.04904	0.000579249	17	64
Q92841	DDX17	Probable ATP-dependent RNA helicase DDX17	1.11931	0.033833	0.00229574	47	0
Q9BW27	NUP85	Nuclear pore complex protein Nup85	1.11915	0.0335581	0.000489274	35	26
Q96A72	MAGOHB	Protein mago nashi homolog 2	1.11857	0.0226474	1.11098e-05	43	9
P60900	PSMA6	Proteasome subunit alpha type-6	1.11844	0.0184566	7.86103e-07	47	0
Q92625	ANKS1A	Ankyrin repeat and SAM domain-containing protein 1A	1.11832	0.0395923	0.00304621	36	23
O00151	PDLIM1	PDZ and LIM domain protein 1	1.11832	0.0729182	0.000790231	8	83
Q9H0A0	NAT10	RNA cytidine acetyltransferase	1.11824	0.0336717	0.00238129	47	0
Q92523	CPT1B	Carnitine O-palmitoyltransferase 1, muscle isoform	1.11815	0.0850753	0.0113551	11	77
Q14C86	GAPVD1	GTPase-activating protein and VPS9 domain-containing protein 1	1.11814	0.0413485	3.31022e-06	11	77
Q9C0E2	XPO4	Exportin-4	1.11771	0.0467593	0.0250808	47	0
Q04206	RELA	Transcription factor p65	1.11765	0.0334002	3.78531e-06	17	64
P61106	RAB14	Ras-related protein Rab-14	1.11711	0.0206063	6.12222e-06	47	0
Q14247	CTTN	Src substrate cortactin	1.11705	0.0504152	0.0129269	32	32
Q9H3K2	GHITM	Growth hormone-inducible transmembrane protein	1.117	0.0446519	0.00844302	36	23
Q9Y2D4	EXOC6B	Exocyst complex component 6B	1.11699	0.0351179	0.00373906	47	0
Q9Y530	OARD1	ADP-ribose glycohydrolase OARD1	1.11686	0.0650261	0.00139959	11	77
Q6IN85	PPP4R3A	Serine/threonine-protein phosphatase 4 regulatory subunit 3A	1.11685	0.0589457	0.00758972	20	57
Q7Z569	BRAP	BRCA1-associated protein	1.11681	0.0537274	2.02078e-06	6	87
P36776	LONP1	Lon protease homolog, mitochondrial	1.11677	0.0331304	0.00229564	47	0
Q14566	MCM6	DNA replication licensing factor MCM6	1.11632	0.0735872	0.00436885	11	77
P40123	CAP2	Adenylyl cyclase-associated protein 2	1.11615	0.0599845	0.00896278	20	57
Q8NI60	COQ8A	Atypical kinase COQ8A, mitochondrial	1.11615	0.07136	0.00226899	10	79
Q03135	CAV1	Caveolin-1	1.1161	0.0691128	0.0190153	19	60
Q9Y3C6	PPIL1	Peptidyl-prolyl cis-trans isomerase-like 1	1.11609	0.0483698	0.0114803	33	30
O43324	EEF1E1	Eukaryotic translation elongation factor 1 epsilon-1	1.11595	0.0352148	0.00410372	47	0
Q8NCN5	PDPR	Pyruvate dehydrogenase phosphatase regulatory subunit, mitochondrial	1.1158	0.043306	0.0134078	43	9
Q9NRG9	AAAS	Aladin	1.11576	0.0322103	0.000496597	36	23
P61026	RAB10	Ras-related protein Rab-10	1.11561	0.0382316	0.00081745	28	40
O95372	LYPLA2	Acyl-protein thioesterase 2	1.11554	0.0418718	0.0145358	47	0
Q96PZ0	PUS7	Pseudouridylate synthase 7 homolog	1.11553	0.0746201	0.000638182	7	85
P51610	HCFC1	Host cell factor 1	1.11528	0.0551707	0.000708583	13	72
P00558	PGK1	Phosphoglycerate kinase 1	1.11524	0.0268919	0.000306652	47	0
P13073	COX4I1	Cytochrome c oxidase subunit 4 isoform 1, mitochondrial	1.11523	0.0227663	3.56958e-05	47	0
Q14694	USP10	Ubiquitin carboxyl-terminal hydrolase 10	1.11486	0.0411107	0.00150386	27	43
P25788	PSMA3	Proteasome subunit alpha type-3	1.11483	0.0160721	1.08609e-07	47	0
P54886	ALDH18A1	Delta-1-pyrroline-5-carboxylate synthase	1.11474	0.0323256	0.00214676	47	0
Q8IW45	NAXD	ATP-dependent (S)-NAD(P)H-hydrate dehydratase	1.11467	0.0239287	4.14285e-05	43	9
Q9NYL4	FKBP11	Peptidyl-prolyl cis-trans isomerase FKBP11	1.11438	0.048499	0.0128315	33	30
Q92783	STAM	Signal transducing adapter molecule 1	1.11419	0.0413332	0.0143948	47	0
Q99943	AGPAT1	1-acyl-sn-glycerol-3-phosphate acyltransferase alpha	1.11411	0.0408362	0.0134028	47	0
P61160	ACTR2	Actin-related protein 2	1.1141	0.0237071	7.16204e-05	47	0
P49792	RANBP2	E3 SUMO-protein ligase RanBP2	1.11388	0.0219136	2.44651e-05	47	0
Q9Y3E5	PTRH2	Peptidyl-tRNA hydrolase 2, mitochondrial	1.11384	0.0601363	0.0885939	47	0
Q9Y4P1	ATG4B	Cysteine protease ATG4B	1.11383	0.0622527	0.000723295	10	79
Q9H2I8	LRMDA	Leucine-rich melanocyte differentiation-associated protein	1.11377	0.0445251	3.6166e-05	12	74
P07711	CTSL	Cathepsin L1	1.11374	0.0756472	0.0181245	15	68
Q92600	CNOT9	CCR4-NOT transcription complex subunit 9	1.11363	0.0397571	5.65713e-05	16	66
P07741	APRT	Adenine phosphoribosyltransferase	1.11338	0.0377908	0.00825963	47	0
Q92621	NUP205	Nuclear pore complex protein Nup205	1.11331	0.0218231	2.47812e-05	47	0
Q8TC07	TBC1D15	TBC1 domain family member 15	1.11322	0.034892	0.00458181	47	0
P43304	GPD2	Glycerol-3-phosphate dehydrogenase, mitochondrial	1.11297	0.0235384	7.43867e-05	47	0
P11021	HSPA5	Endoplasmic reticulum chaperone BiP	1.11296	0.0242473	0.000109923	47	0
P0DMV8	HSPA1A	Heat shock 70 kDa protein 1A	1.11255	0.0501119	0.0442037	47	0
O60814	H2BC12	Histone H2B type 1-K	1.11255	0.0782061	0.000608121	6	87
P08559	PDHA1	Pyruvate dehydrogenase E1 component subunit alpha, somatic form, mitochondrial	1.11254	0.0277453	0.000564566	47	0
P06744	GPI	Glucose-6-phosphate isomerase	1.11246	0.0293875	0.00103293	47	0
Q7Z3J2	VPS35L	VPS35 endosomal protein sorting factor-like	1.11236	0.0357383	0.0058577	47	0
P06746	POLB	DNA polymerase beta	1.11219	0.0363692	0.000217949	23	51
P00846	MT-ATP6	ATP synthase subunit a	1.11155	0.0615971	0.029554	26	45
Q9UHB9	SRP68	Signal recognition particle subunit SRP68	1.11155	0.0311822	0.00198492	47	0
P35998	PSMC2	26S proteasome regulatory subunit 7	1.11154	0.0201255	9.26216e-06	47	0
P12270	TPR	Nucleoprotein TPR	1.11132	0.0346635	0.00495509	47	0
P04066	FUCA1	Tissue alpha-L-fucosidase	1.11092	0.0771536	0.193789	47	0
Q92878	RAD50	DNA repair protein RAD50	1.11089	0.0334391	0.00383301	47	0
P34932	HSPA4	Heat shock 70 kDa protein 4	1.11083	0.0213702	2.52333e-05	47	0
Q8TAE8	GADD45GIP1	Growth arrest and DNA damage-inducible proteins-interacting protein 1	1.1106	0.0451593	0.000540366	17	64
Q9H3H1	TRIT1	tRNA dimethylallyltransferase	1.11041	0.0675624	0.00329409	11	77
Q9BTE3	MCMBP	Mini-chromosome maintenance complex-binding protein	1.11019	0.0569598	0.000655983	11	77
Q8N163	CCAR2	Cell cycle and apoptosis regulator protein 2	1.11015	0.030135	0.00161746	47	0
P53999	SUB1	Activated RNA polymerase II transcriptional coactivator p15	1.10955	0.0300859	0.00167452	47	0
P15170	GSPT1	Eukaryotic peptide chain release factor GTP-binding subunit ERF3A	1.10954	0.037475	0.00985484	47	0
P15498	VAV1	Proto-oncogene vav	1.10945	0.131947	0.0375172	6	87
Q6FI81	CIAPIN1	Anamorsin	1.1091	0.0479756	0.0414345	47	0
P21953	BCKDHB	2-oxoisovalerate dehydrogenase subunit beta, mitochondrial	1.10908	0.061915	0.00352256	13	72
P51571	SSR4	Translocon-associated protein subunit delta	1.10887	0.0459965	0.0206626	39	17
O95470	SGPL1	Sphingosine-1-phosphate lyase 1	1.10884	0.0489566	0.00960204	27	43
Q92973	TNPO1	Transportin-1	1.10873	0.0189367	5.35828e-06	47	0
Q9NSY0	NRBP2	Nuclear receptor-binding protein 2	1.10865	0.0756058	0.00251616	8	83
Q9BW92	TARS2	Threonine--tRNA ligase, mitochondrial	1.10821	0.0439946	0.00598407	29	38
Q8ND90	PNMA1	Paraneoplastic antigen Ma1	1.1082	0.0611176	0.000578477	9	81
Q13131	PRKAA1	5~-AMP-activated protein kinase catalytic subunit alpha-1	1.108	0.0272211	0.000108257	34	28
Q8N122	RPTOR	Regulatory-associated protein of mTOR	1.10783	0.0366471	0.00175141	31	34
Q15397	PUM3	Pumilio homolog 3	1.10774	0.0627647	0.121139	47	0
Q5SRE5	NUP188	Nucleoporin NUP188 homolog	1.10759	0.0374315	0.00217919	31	34
P55809	OXCT1	Succinyl-CoA:3-ketoacid coenzyme A transferase 1, mitochondrial	1.10754	0.0297195	0.00177156	47	0
Q9UJS0	SLC25A13	Calcium-binding mitochondrial carrier protein Aralar2	1.10746	0.0345878	0.00633484	47	0
Q9H488	POFUT1	GDP-fucose protein O-fucosyltransferase 1	1.10717	0.0320495	0.000478931	31	34
Q9NR50	EIF2B3	Translation initiation factor eIF-2B subunit gamma	1.10698	0.0708869	0.0015989	8	83
Q9Y5L4	TIMM13	Mitochondrial import inner membrane translocase subunit Tim13	1.10691	0.0660105	0.00674793	13	72
Q9NRN7	AASDHPPT	L-aminoadipate-semialdehyde dehydrogenase-phosphopantetheinyl transferase	1.10685	0.0359399	3.68383e-06	12	74
Q9BTC8	MTA3	Metastasis-associated protein MTA3	1.10672	0.0409357	1.11775e-06	8	83
Q9UIA9	XPO7	Exportin-7	1.10658	0.0282272	0.00117171	47	0
Q9UI26	IPO11	Importin-11	1.10638	0.0475585	0.000121239	11	77
Q567U6	CCDC93	Coiled-coil domain-containing protein 93	1.10625	0.0838017	0.0041055	7	85
Q9HCS7	XAB2	Pre-mRNA-splicing factor SYF1	1.10618	0.0677648	0.00195175	9	81
O43488	AKR7A2	Aflatoxin B1 aldehyde reductase member 2	1.10615	0.03734	0.0118568	47	0
O75380	NDUFS6	NADH dehydrogenase [ubiquinone] iron-sulfur protein 6, mitochondrial	1.10595	0.0521183	0.00873459	22	53
Q9Y3T9	NOC2L	Nucleolar complex protein 2 homolog	1.10595	0.05297	0.0148266	25	47
P26038	MSN	Moesin	1.1058	0.0285872	0.00142676	47	0
O95302	FKBP9	Peptidyl-prolyl cis-trans isomerase FKBP9	1.10578	0.0341616	0.00647498	47	0
Q8TET4	GANC	Neutral alpha-glucosidase C	1.10553	0.0551437	0.00653249	18	62
Q99523	SORT1	Sortilin	1.10509	0.0400852	0.0195062	47	0
Q7Z429	GRINA	Protein lifeguard 1	1.1049	0.166132	0.0806532	5	89
Q96N67	DOCK7	Dedicator of cytokinesis protein 7	1.10448	0.0250895	0.000421477	47	0
Q13617	CUL2	Cullin-2	1.10436	0.0210981	5.01541e-05	47	0
Q9NWW6	NMRK1	Nicotinamide riboside kinase 1	1.10412	0.0755605	0.000946419	6	87
P09001	MRPL3	39S ribosomal protein L3, mitochondrial	1.10408	0.0462707	0.0201463	35	26
Q9UJU6	DBNL	Drebrin-like protein	1.10403	0.0264461	0.000774614	47	0
Q01433	AMPD2	AMP deaminase 2	1.10367	0.0378222	6.50807e-05	15	68
Q8NAV1	PRPF38A	Pre-mRNA-splicing factor 38A	1.1036	0.0756639	0.00876124	10	79
P48444	ARCN1	Coatomer subunit delta	1.10329	0.0263271	0.000795149	47	0
Q9BS26	ERP44	Endoplasmic reticulum resident protein 44	1.10314	0.0224231	0.000129576	47	0
Q99807	COQ7	5-demethoxyubiquinone hydroxylase, mitochondrial	1.10306	0.0679073	0.0025915	9	81
Q86X10	RALGAPB	Ral GTPase-activating protein subunit beta	1.1029	0.0452072	0.0271937	40	15
O75348	ATP6V1G1	V-type proton ATPase subunit G 1	1.10287	0.0379687	0.0129979	44	6
Q6P1X6	C8orf82	UPF0598 protein C8orf82	1.10264	0.0560378	0.0274712	26	45
P99999	CYCS	Cytochrome c	1.10253	0.0578193	0.109245	47	0
Q9P2R3	ANKFY1	Rabankyrin-5	1.10251	0.0238734	0.000298698	47	0
Q9BSD7	NTPCR	Cancer-related nucleoside-triphosphatase	1.10241	0.0418086	0.0282359	47	0
Q9NZD8	SPG21	Maspardin	1.10236	0.0375191	0.00747238	38	19
Q9HB71	CACYBP	Calcyclin-binding protein	1.10234	0.0406727	0.0152633	40	15
Q7Z2W9	MRPL21	39S ribosomal protein L21, mitochondrial	1.10226	0.0443614	0.0189147	36	23
P30566	ADSL	Adenylosuccinate lyase	1.10223	0.0372934	0.0147828	47	0
Q96MW5	COG8	Conserved oligomeric Golgi complex subunit 8	1.10213	0.0348787	0.00312969	35	26
Q13011	ECH1	Delta(3,5)-Delta(2,4)-dienoyl-CoA isomerase, mitochondrial	1.10186	0.0392781	0.0206545	47	0
Q8IWV7	UBR1	E3 ubiquitin-protein ligase UBR1	1.1016	0.0526235	0.000216942	9	81
P62714	PPP2CB	Serine/threonine-protein phosphatase 2A catalytic subunit beta isoform	1.10144	0.0721115	3.10671e-07	2	96
Q9Y6G5	COMMD10	COMM domain-containing protein 10	1.10122	0.0560136	3.71011e-05	6	87
Q8NE01	CNNM3	Metal transporter CNNM3	1.10116	0.0643235	0.0164254	16	66
Q9Y230	RUVBL2	RuvB-like 2	1.10076	0.0349233	0.0106206	47	0
Q9UMS0	NFU1	NFU1 iron-sulfur cluster scaffold homolog, mitochondrial	1.1004	0.0792182	1.92494e-06	2	96
O00273	DFFA	DNA fragmentation factor subunit alpha	1.10028	0.0450184	0.028369	39	17
Q92890	UFD1	Ubiquitin recognition factor in ER-associated degradation protein 1	1.10027	0.0409328	0.000536913	17	64
Q9NX63	CHCHD3	MICOS complex subunit MIC19	1.10007	0.0369722	0.0159743	47	0
P14868	DARS1	Aspartate--tRNA ligase, cytoplasmic	1.09986	0.0319734	0.00602199	47	0
Q9UHX1	PUF60	Poly(U)-binding-splicing factor PUF60	1.09972	0.0345325	0.0105395	47	0
Q9BQ75	CMSS1	Protein CMSS1	1.09951	0.0442248	1.25744e-05	8	83
P62820	RAB1A	Ras-related protein Rab-1A	1.09949	0.0246478	0.000590126	47	0
Q12792	TWF1	Twinfilin-1	1.09947	0.0232289	0.000308484	47	0
P34897	SHMT2	Serine hydroxymethyltransferase, mitochondrial	1.09945	0.0327659	0.00742627	47	0
P20700	LMNB1	Lamin-B1	1.09936	0.0460688	0.052023	47	0
O75477	ERLIN1	Erlin-1	1.09934	0.0674363	0.00507611	10	79
Q16629	SRSF7	Serine/arginine-rich splicing factor 7	1.09927	0.040069	0.00802132	32	32
P82673	MRPS35	28S ribosomal protein S35, mitochondrial	1.09926	0.0705612	0.00482879	9	81
P55209	NAP1L1	Nucleosome assembly protein 1-like 1	1.09895	0.0287218	0.0027376	47	0
Q14839	CHD4	Chromodomain-helicase-DNA-binding protein 4	1.09881	0.0213337	0.000120175	47	0
O75063	FAM20B	Glycosaminoglycan xylosylkinase	1.09871	0.0729767	0.000441274	5	89
Q12824	SMARCB1	SWI/SNF-related matrix-associated actin-dependent regulator of chromatin subfamily B member 1	1.09869	0.0698263	6.72976e-05	4	91
Q96ME1	FBXL18	F-box/LRR-repeat protein 18	1.09866	0.0470169	0.00391706	19	60
Q9UKK9	NUDT5	ADP-sugar pyrophosphatase	1.09864	0.0302985	0.00303786	43	9
P56381	ATP5F1E	ATP synthase subunit epsilon, mitochondrial	1.09863	0.0572961	0.00418818	13	72
Q9NXC5	MIOS	GATOR complex protein MIOS	1.09846	0.04786	0.0123127	25	47
P29401	TKT	Transketolase	1.09845	0.0343713	0.0111222	47	0
O15269	SPTLC1	Serine palmitoyltransferase 1	1.09837	0.0402701	1.19292e-06	7	85
P62312	LSM6	U6 snRNA-associated Sm-like protein LSm6	1.0981	0.0757234	0.0170069	11	77
Q9Y4W2	LAS1L	Ribosomal biogenesis protein LAS1L	1.09801	0.0516294	0.000793389	11	77
Q8NEB9	PIK3C3	Phosphatidylinositol 3-kinase catalytic subunit type 3	1.09758	0.0614393	0.081521	32	32
Q92900	UPF1	Regulator of nonsense transcripts 1	1.09754	0.0183709	1.88984e-05	47	0
Q9HAV0	GNB4	Guanine nucleotide-binding protein subunit beta-4	1.09748	0.0433424	0.0325809	42	11
Q14690	PDCD11	Protein RRP5 homolog	1.09745	0.0337923	0.00596993	40	15
P35659	DEK	Protein DEK	1.09734	0.0491668	0.0735833	47	0
Q9BQA1	WDR77	Methylosome protein 50	1.09706	0.0353575	0.00644157	37	21
Q08J23	NSUN2	RNA cytosine C(5)-methyltransferase NSUN2	1.09681	0.0282861	0.00289687	47	0
P46060	RANGAP1	Ran GTPase-activating protein 1	1.0968	0.0220269	0.000228926	47	0
Q9Y5X2	SNX8	Sorting nexin-8	1.09674	0.038963	0.0260934	47	0
P45880	VDAC2	Voltage-dependent anion-selective channel protein 2	1.09648	0.0286939	0.00336041	47	0
P17844	DDX5	Probable ATP-dependent RNA helicase DDX5	1.09632	0.0271623	0.00211755	47	0
P61758	VBP1	Prefoldin subunit 3	1.0962	0.0406244	0.0332928	47	0
P49750	YLPM1	YLP motif-containing protein 1	1.09616	0.0754088	0.00387268	7	85
P46777	RPL5	60S ribosomal protein L5	1.09607	0.037392	0.0216014	47	0
O00443	PIK3C2A	Phosphatidylinositol 4-phosphate 3-kinase C2 domain-containing subunit alpha	1.09566	0.0428136	0.00178968	18	62
Q15061	WDR43	WD repeat-containing protein 43	1.09541	0.0451509	0.0464416	43	9
P11387	TOP1	DNA topoisomerase 1	1.09522	0.0324587	0.00683847	43	9
Q9NUY8	TBC1D23	TBC1 domain family member 23	1.09503	0.078976	0.0014611	5	89
Q9Y5P4	CERT1	Ceramide transfer protein	1.09502	0.0298207	0.00473716	46	2
O75170	PPP6R2	Serine/threonine-protein phosphatase 6 regulatory subunit 2	1.09492	0.0345236	0.00514722	35	26
Q99698	LYST	Lysosomal-trafficking regulator	1.09489	0.0467821	0.0638345	46	2
O15144	ARPC2	Actin-related protein 2/3 complex subunit 2	1.0947	0.0273097	0.00257904	47	0
Q9P015	MRPL15	39S ribosomal protein L15, mitochondrial	1.09467	0.0381814	0.000233424	15	68
Q69YN4	VIRMA	Protein virilizer homolog	1.09464	0.0211868	2.77038e-05	35	26
Q9BVJ6	UTP14A	U3 small nucleolar RNA-associated protein 14 homolog A	1.09461	0.0608927	0.00484097	11	77
Q9HC07	TMEM165	Transmembrane protein 165	1.09455	0.058612	1.06241e-05	4	91
P08621	SNRNP70	U1 small nuclear ribonucleoprotein 70 kDa	1.09454	0.0288732	0.00165441	38	19
P62241	RPS8	40S ribosomal protein S8	1.09446	0.0544895	0.11586	47	0
Q2VIR3	EIF2S3B	Eukaryotic translation initiation factor 2 subunit 3B	1.09427	0.0322098	0.00482531	39	17
Q9UMR2	DDX19B	ATP-dependent RNA helicase DDX19B	1.09424	0.030538	0.000655983	28	40
O14776	TCERG1	Transcription elongation regulator 1	1.0942	0.0544882	0.000742135	9	81
P57764	GSDMD	Gasdermin-D	1.09399	0.0480727	0.0767757	47	0
P06730	EIF4E	Eukaryotic translation initiation factor 4E	1.09384	0.056728	0.112638	42	11
P09622	DLD	Dihydrolipoyl dehydrogenase, mitochondrial	1.09383	0.0257925	0.00166867	47	0
P11233	RALA	Ras-related protein Ral-A	1.09377	0.0428812	0.0119018	28	40
P62330	ARF6	ADP-ribosylation factor 6	1.09357	0.0221103	0.000354814	47	0
Q6UB35	MTHFD1L	Monofunctional C1-tetrahydrofolate synthase, mitochondrial	1.09352	0.0379688	0.0270817	47	0
Q6IAA8	LAMTOR1	Ragulator complex protein LAMTOR1	1.09333	0.0362204	0.0130355	40	15
P28289	TMOD1	Tropomodulin-1	1.09331	0.0522703	0.0440046	30	36
Q8NI27	THOC2	THO complex subunit 2	1.0933	0.0354325	0.00394272	30	36
P51858	HDGF	Hepatoma-derived growth factor	1.09326	0.0297815	0.00587606	47	0
Q9Y2T7	YBX2	Y-box-binding protein 2	1.09323	0.0635143	0.00108447	7	85
Q8N5C6	SRBD1	S1 RNA-binding domain-containing protein 1	1.09317	0.0452333	0.00781987	22	53
Q9P0V9	SEPTIN10	Septin-10	1.09308	0.0359009	0.0204381	47	0
Q01844	EWSR1	RNA-binding protein EWS	1.09297	0.0633377	0.0130828	13	72
P39748	FEN1	Flap endonuclease 1	1.09227	0.0406001	0.0202365	36	23
Q8N3P4	VPS8	Vacuolar protein sorting-associated protein 8 homolog	1.09188	0.0553594	0.000298679	7	85
Q96DI7	SNRNP40	U5 small nuclear ribonucleoprotein 40 kDa protein	1.09181	0.0411971	0.000351494	13	72
Q13242	SRSF9	Serine/arginine-rich splicing factor 9	1.09181	0.0825039	0.030129	10	79
P52292	KPNA2	Importin subunit alpha-1	1.09176	0.0583075	0.00610423	12	74
O00338	SULT1C2	Sulfotransferase 1C2	1.09152	0.0736618	0.0616905	17	64
P26196	DDX6	Probable ATP-dependent RNA helicase DDX6	1.09116	0.0429831	0.0553597	47	0
Q9UNN5	FAF1	FAS-associated factor 1	1.09102	0.0274093	0.000521387	31	34
P63000	RAC1	Ras-related C3 botulinum toxin substrate 1	1.09088	0.0222452	0.000525814	47	0
Q8N1F7	NUP93	Nuclear pore complex protein Nup93	1.09081	0.0244244	0.00136133	47	0
Q9NRX1	PNO1	RNA-binding protein PNO1	1.09069	0.0558975	0.0531821	27	43
Q9H2U2	PPA2	Inorganic pyrophosphatase 2, mitochondrial	1.09065	0.0361761	0.0246479	47	0
P40818	USP8	Ubiquitin carboxyl-terminal hydrolase 8	1.09053	0.0332379	4.08796e-06	10	79
Q7L523	RRAGA	Ras-related GTP-binding protein A	1.09039	0.0273789	0.00388593	47	0
Q56VL3	OCIAD2	OCIA domain-containing protein 2	1.09025	0.0625949	0.0513646	21	55
Q92616	GCN1	eIF-2-alpha kinase activator GCN1	1.09023	0.0270468	0.00357921	47	0
O75592	MYCBP2	E3 ubiquitin-protein ligase MYCBP2	1.09006	0.0522879	0.00712156	15	68
Q8N2G8	GHDC	GH3 domain-containing protein	1.08995	0.0305443	0.00720565	44	6
Q13177	PAK2	Serine/threonine-protein kinase PAK 2	1.08986	0.0320327	0.00937747	43	9
P38159	RBMX	RNA-binding motif protein, X chromosome	1.08979	0.0529247	0.122871	47	0
Q96C86	DCPS	m7GpppX diphosphatase	1.0897	0.0309011	0.0100619	47	0
Q96J01	THOC3	THO complex subunit 3	1.08959	0.0535204	0.00378075	12	74
Q99653	CHP1	Calcineurin B homologous protein 1	1.08955	0.032377	0.0103134	43	9
P25789	PSMA4	Proteasome subunit alpha type-4	1.08941	0.0185982	7.78973e-05	47	0
P41227	NAA10	N-alpha-acetyltransferase 10	1.08934	0.0674163	0.0146003	11	77
O43314	PPIP5K2	Inositol hexakisphosphate and diphosphoinositol-pentakisphosphate kinase 2	1.0892	0.0406961	0.000162871	11	77
O14980	XPO1	Exportin-1	1.08917	0.0217005	0.000496597	47	0
Q15056	EIF4H	Eukaryotic translation initiation factor 4H	1.08914	0.0428503	0.0597559	47	0
Q9NVU7	SDAD1	Protein SDA1 homolog	1.08908	0.0678254	0.00516428	8	83
O60678	PRMT3	Protein arginine N-methyltransferase 3	1.08906	0.0663893	0.000492132	5	89
Q9UN86	G3BP2	Ras GTPase-activating protein-binding protein 2	1.08901	0.0441381	0.000424785	11	77
Q9NXR1	NDE1	Nuclear distribution protein nudE homolog 1	1.08893	0.0384118	3.30051e-06	7	85
P04632	CAPNS1	Calpain small subunit 1	1.08876	0.0171631	2.95119e-05	47	0
Q86V88	MDP1	Magnesium-dependent phosphatase 1	1.0885	0.0891087	0.0406371	9	81
P36542	ATP5F1C	ATP synthase subunit gamma, mitochondrial	1.08849	0.0251245	0.00224971	47	0
Q86YS7	C2CD5	C2 domain-containing protein 5	1.08777	0.0382927	1.06785e-05	8	83
Q9UHA4	LAMTOR3	Ragulator complex protein LAMTOR3	1.08758	0.0375106	0.0171745	36	23
Q9Y371	SH3GLB1	Endophilin-B1	1.08756	0.0330222	0.00820087	37	21
Q03154	ACY1	Aminoacylase-1	1.08749	0.0348595	0.0243676	47	0
Q96KR1	ZFR	Zinc finger RNA-binding protein	1.08714	0.0280438	5.15852e-07	10	79
Q8TCF1	ZFAND1	AN1-type zinc finger protein 1	1.087	0.0557745	0.0031976	10	79
P14866	HNRNPL	Heterogeneous nuclear ribonucleoprotein L	1.08685	0.0272258	0.0050775	47	0
Q9NXA8	SIRT5	NAD-dependent protein deacylase sirtuin-5, mitochondrial	1.08674	0.0512718	9.63033e-05	6	87
Q9UL46	PSME2	Proteasome activator complex subunit 2	1.08673	0.0425316	0.0645959	47	0
Q12982	BNIP2	BCL2/adenovirus E1B 19 kDa protein-interacting protein 2	1.08663	0.0318721	9.16866e-06	11	77
Q9H583	HEATR1	HEAT repeat-containing protein 1	1.08651	0.0263178	0.00402332	47	0
Q15370	ELOB	Elongin-B	1.08644	0.0607136	0.0379574	18	62
P49915	GMPS	GMP synthase [glutamine-hydrolyzing]	1.08638	0.0380836	0.020349	36	23
Q96I25	RBM17	Splicing factor 45	1.08602	0.0531103	0.000164758	6	87
O00159	MYO1C	Unconventional myosin-Ic	1.086	0.0407528	0.056115	47	0
O60664	PLIN3	Perilipin-3	1.08569	0.0419269	0.0639443	47	0
P00813	ADA	Adenosine deaminase	1.08567	0.123102	0.0770899	6	87
P07814	EPRS1	Bifunctional glutamate/proline--tRNA ligase	1.08551	0.0207881	0.000496597	47	0
Q7Z478	DHX29	ATP-dependent RNA helicase DHX29	1.08547	0.0479985	0.00316828	13	72
Q8IXI1	RHOT2	Mitochondrial Rho GTPase 2	1.08541	0.0232991	0.00156662	47	0
Q9NVH6	TMLHE	Trimethyllysine dioxygenase, mitochondrial	1.0854	0.104512	0.055375	7	85
P61981	YWHAG	14-3-3 protein gamma	1.08528	0.0292717	0.00978451	47	0
Q7Z392	TRAPPC11	Trafficking protein particle complex subunit 11	1.08518	0.0587596	0.00378075	9	81
P38919	EIF4A3	Eukaryotic initiation factor 4A-III	1.08517	0.0229416	0.00139072	47	0
P11802	CDK4	Cyclin-dependent kinase 4	1.08513	0.0484952	0.000343821	8	83
P51532	SMARCA4	Transcription activator BRG1	1.08512	0.0411624	4.68906e-05	8	83
Q86TX2	ACOT1	Acyl-coenzyme A thioesterase 1	1.08512	0.0647906	0.0302366	14	70
Q9Y4G8	RAPGEF2	Rap guanine nucleotide exchange factor 2	1.0851	0.0557533	0.000329814	6	87
Q13464	ROCK1	Rho-associated protein kinase 1	1.08503	0.0633206	0.0621344	20	57
Q8TAT6	NPLOC4	Nuclear protein localization protein 4 homolog	1.08442	0.0482768	0.0407897	28	40
Q99615	DNAJC7	DnaJ homolog subfamily C member 7	1.08428	0.0545822	0.000291247	6	87
P22314	UBA1	Ubiquitin-like modifier-activating enzyme 1	1.084	0.0217106	0.000933157	47	0
O95793	STAU1	Double-stranded RNA-binding protein Staufen homolog 1	1.08398	0.0300531	0.00505072	36	23
Q9Y3L5	RAP2C	Ras-related protein Rap-2c	1.0836	0.0601444	0.0018439	7	85
Q14919	DRAP1	Dr1-associated corepressor	1.08347	0.0548958	0.0445816	22	53
Q8TD19	NEK9	Serine/threonine-protein kinase Nek9	1.08338	0.0426258	0.000597685	11	77
P24539	ATP5PB	ATP synthase F(0) complex subunit B1, mitochondrial	1.0828	0.0298971	0.0136163	47	0
Q8N9N2	ASCC1	Activating signal cointegrator 1 complex subunit 1	1.0825	0.0330537	0.00164843	22	53
Q9Y2S7	POLDIP2	Polymerase delta-interacting protein 2	1.08239	0.0328872	0.0245024	47	0
Q92925	SMARCD2	SWI/SNF-related matrix-associated actin-dependent regulator of chromatin subfamily D member 2	1.08237	0.0712308	0.0045522	6	87
P61019	RAB2A	Ras-related protein Rab-2A	1.08235	0.0397559	0.060383	47	0
Q8NF50	DOCK8	Dedicator of cytokinesis protein 8	1.08231	0.0610355	0.0130828	11	77
O60306	AQR	RNA helicase aquarius	1.08226	0.0508001	0.0367044	23	51
Q5VZ89	DENND4C	DENN domain-containing protein 4C	1.08206	0.0453643	0.00378075	14	70
P31946	YWHAB	14-3-3 protein beta/alpha	1.08199	0.027698	0.00876124	47	0
Q13485	SMAD4	Mothers against decapentaplegic homolog 4	1.08195	0.0324764	0.00620621	31	34
Q8IWA4	MFN1	Mitofusin-1	1.08177	0.0327149	0.00663819	31	34
Q99541	PLIN2	Perilipin-2	1.08148	0.138301	0.0668889	4	91
Q7Z2W4	ZC3HAV1	Zinc finger CCCH-type antiviral protein 1	1.08125	0.0539143	0.101722	33	30
Q86Y79	PTRH1	Probable peptidyl-tRNA hydrolase	1.08109	0.0264482	0.0018406	34	28
Q9UBQ7	GRHPR	Glyoxylate reductase/hydroxypyruvate reductase	1.08106	0.0280029	0.0102081	47	0
O75494	SRSF10	Serine/arginine-rich splicing factor 10	1.08101	0.0380769	0.000875238	14	70
Q6P1K8	GTF2H2C	General transcription factor IIH subunit 2-like protein	1.08084	0.0491021	0.000342185	7	85
Q9UG63	ABCF2	ATP-binding cassette sub-family F member 2	1.08083	0.0368828	0.0192429	33	30
O43299	AP5Z1	AP-5 complex subunit zeta-1	1.08078	0.0333316	0.00175016	21	55
Q9UBM1	PEMT	Phosphatidylethanolamine N-methyltransferase	1.08078	0.0513961	1.83995e-05	4	91
Q15628	TRADD	Tumor necrosis factor receptor type 1-associated DEATH domain protein	1.08077	0.0364821	0.0165375	32	32
Q9Y3A5	SBDS	Ribosome maturation protein SBDS	1.08053	0.0321524	0.0245024	47	0
O60506	SYNCRIP	Heterogeneous nuclear ribonucleoprotein Q	1.08	0.0350717	0.0393408	47	0
O43181	NDUFS4	NADH dehydrogenase [ubiquinone] iron-sulfur protein 4, mitochondrial	1.07962	0.0606933	0.0200755	12	74
Q12768	WASHC5	WASH complex subunit 5	1.07949	0.0377657	0.0563737	47	0
P61077	UBE2D3	Ubiquitin-conjugating enzyme E2 D3	1.07919	0.0200587	0.000777934	47	0
P28072	PSMB6	Proteasome subunit beta type-6	1.0791	0.0375275	0.0560547	47	0
Q86XP3	DDX42	ATP-dependent RNA helicase DDX42	1.07903	0.0352539	0.0426348	47	0
Q92905	COPS5	COP9 signalosome complex subunit 5	1.07881	0.033202	0.0323108	47	0
Q0JRZ9	FCHO2	F-BAR domain only protein 2	1.07852	0.0570268	0.0557143	20	57
Q9HAU5	UPF2	Regulator of nonsense transcripts 2	1.07839	0.0351842	0.00363529	21	55
P11182	DBT	Lipoamide acyltransferase component of branched-chain alpha-keto acid dehydrogenase complex, mitochondrial	1.07836	0.0329161	0.00364772	24	49
Q9H845	ACAD9	Complex I assembly factor ACAD9, mitochondrial	1.07821	0.0319494	0.0275795	47	0
Q15424	SAFB	Scaffold attachment factor B1	1.07817	0.0422465	0.0816971	44	6
P31153	MAT2A	S-adenosylmethionine synthase isoform type-2	1.07802	0.0244208	0.00505072	47	0
P00387	CYB5R3	NADH-cytochrome b5 reductase 3	1.07796	0.0249319	0.00594506	47	0
P61956	SUMO2	Small ubiquitin-related modifier 2	1.07787	0.0438303	0.000146251	7	85
P55735	SEC13	Protein SEC13 homolog	1.07741	0.0292711	0.0169055	46	2
P23284	PPIB	Peptidyl-prolyl cis-trans isomerase B	1.07738	0.0355038	0.048465	47	0
Q9H307	PNN	Pinin	1.07729	0.0312847	0.0220069	44	6
Q9GZL7	WDR12	Ribosome biogenesis protein WDR12	1.07716	0.0446476	0.0262831	23	51
O60925	PFDN1	Prefoldin subunit 1	1.07703	0.0395156	0.0113696	22	53
Q9Y2I1	NISCH	Nischarin	1.07701	0.0335579	0.0145471	33	30
Q9H3S7	PTPN23	Tyrosine-protein phosphatase non-receptor type 23	1.07701	0.0328271	0.0289439	44	6
Q9BQA9	CYBC1	Cytochrome b-245 chaperone 1	1.077	0.0578988	0.0453303	17	64
P13984	GTF2F2	General transcription factor IIF subunit 2	1.07683	0.035766	1.25974e-05	7	85
O94776	MTA2	Metastasis-associated protein MTA2	1.07683	0.0388096	0.00176507	14	70
Q9Y6C9	MTCH2	Mitochondrial carrier homolog 2	1.07678	0.0389392	0.0730796	47	0
Q9Y666	SLC12A7	Solute carrier family 12 member 7	1.07678	0.052402	0.0035178	9	81
P53992	SEC24C	Protein transport protein Sec24C	1.07659	0.0281068	0.0122737	44	6
Q96SB4	SRPK1	SRSF protein kinase 1	1.07656	0.0619919	0.00499897	7	85
Q13724	MOGS	Mannosyl-oligosaccharide glucosidase	1.07649	0.0261653	0.00957347	47	0
P33897	ABCD1	ATP-binding cassette sub-family D member 1	1.07639	0.0544264	0.0568249	21	55
Q9BTE6	AARSD1	Alanyl-tRNA editing protein Aarsd1	1.07624	0.0337044	1.57767e-05	8	83
Q9BVI4	NOC4L	Nucleolar complex protein 4 homolog	1.07622	0.0388102	0.0246827	29	38
Q15008	PSMD6	26S proteasome non-ATPase regulatory subunit 6	1.07607	0.0179322	0.000376274	47	0
P49959	MRE11	Double-strand break repair protein MRE11	1.07604	0.0317525	0.026025	44	6
Q9UBU9	NXF1	Nuclear RNA export factor 1	1.07585	0.0479668	0.0127594	15	68
P50336	PPOX	Protoporphyrinogen oxidase	1.07577	0.0404066	0.0521616	36	23
Q9P265	DIP2B	Disco-interacting protein 2 homolog B	1.07522	0.0367191	0.062792	47	0
O75935	DCTN3	Dynactin subunit 3	1.07501	0.030013	0.0206148	44	6
Q96I15	SCLY	Selenocysteine lyase	1.07482	0.0428054	0.0843236	40	15
Q9HCL2	GPAM	Glycerol-3-phosphate acyltransferase 1, mitochondrial	1.07474	0.042552	0.026981	24	49
Q8WV93	AFG1L	AFG1-like ATPase	1.07448	0.0434482	9.30821e-05	6	87
P61221	ABCE1	ATP-binding cassette sub-family E member 1	1.07447	0.0263028	0.0118836	47	0
Q02790	FKBP4	Peptidyl-prolyl cis-trans isomerase FKBP4	1.07387	0.0271369	0.0151118	47	0
Q9UIC8	LCMT1	Leucine carboxyl methyltransferase 1	1.07367	0.0665981	0.084069	16	66
O15321	TM9SF1	Transmembrane 9 superfamily member 1	1.07335	0.0457827	7.09067e-05	5	89
P20585	MSH3	DNA mismatch repair protein Msh3	1.07333	0.0663694	0.0939658	17	64
Q9NP97	DYNLRB1	Dynein light chain roadblock-type 1	1.07324	0.0241572	0.00746	47	0
P53634	CTSC	Dipeptidyl peptidase 1	1.07305	0.0628333	0.287059	47	0
P07203	GPX1	Glutathione peroxidase 1	1.07303	0.0380896	0.0806704	47	0
P03886	MT-ND1	NADH-ubiquinone oxidoreductase chain 1	1.07302	0.107157	0.0349128	4	91
Q6XUX3	DSTYK	Dual serine/threonine and tyrosine protein kinase	1.07286	0.0596355	0.0499857	15	68
Q9H1E5	TMX4	Thioredoxin-related transmembrane protein 4	1.07272	0.088911	0.169826	14	70
P51798	CLCN7	H(+)/Cl(-) exchange transporter 7	1.07253	0.0540317	0.218649	47	0
Q969X5	ERGIC1	Endoplasmic reticulum-Golgi intermediate compartment protein 1	1.07218	0.0468493	0.00363474	10	79
Q9BZQ8	NIBAN1	Protein Niban 1	1.07183	0.060921	0.279875	47	0
Q96A65	EXOC4	Exocyst complex component 4	1.07179	0.0215174	0.00366556	47	0
Q9NPF4	OSGEP	Probable tRNA N6-adenosine threonylcarbamoyltransferase	1.07149	0.0339844	0.0222025	32	32
Q15904	ATP6AP1	V-type proton ATPase subunit S1	1.07144	0.0752983	0.0742992	11	77
P47756	CAPZB	F-actin-capping protein subunit beta	1.07116	0.023055	0.00659048	47	0
Q9BQS8	FYCO1	FYVE and coiled-coil domain-containing protein 1	1.07043	0.0583115	0.00051271	4	91
O95571	ETHE1	Persulfide dioxygenase ETHE1, mitochondrial	1.07022	0.035527	0.0492993	39	17
Q12904	AIMP1	Aminoacyl tRNA synthase complex-interacting multifunctional protein 1	1.0702	0.0256198	0.0145667	47	0
Q8NBN7	RDH13	Retinol dehydrogenase 13	1.07014	0.0449793	0.0139476	15	68
P40967	PMEL	Melanocyte protein PMEL	1.07009	0.0669928	0.338263	47	0
O43169	CYB5B	Cytochrome b5 type B	1.07002	0.0368538	0.0706607	43	9
P05161	ISG15	Ubiquitin-like protein ISG15	1.0698	0.0783036	0.289684	28	40
P40616	ARL1	ADP-ribosylation factor-like protein 1	1.06939	0.0199886	0.00267968	47	0
Q9P0M6	MACROH2A2	Core histone macro-H2A.2	1.06932	0.0508126	0.16978	39	17
O75436	VPS26A	Vacuolar protein sorting-associated protein 26A	1.06903	0.0290622	0.0321392	47	0
O75165	DNAJC13	DnaJ homolog subfamily C member 13	1.06893	0.0250957	0.0143906	47	0
P42566	EPS15	Epidermal growth factor receptor substrate 15	1.06883	0.0370408	0.0199388	24	49
Q9UHI5	SLC7A8	Large neutral amino acids transporter small subunit 2	1.0688	0.149513	0.0964368	3	94
O95861	BPNT1	3~(2~),5~-bisphosphate nucleotidase 1	1.06861	0.0374767	0.0948248	47	0
Q9Y697	NFS1	Cysteine desulfurase, mitochondrial	1.06856	0.0570741	0.116417	23	51
Q6ZNJ1	NBEAL2	Neurobeachin-like protein 2	1.06846	0.0622103	0.122749	20	57
Q9BTM9	URM1	Ubiquitin-related modifier 1	1.06829	0.10098	0.219351	12	74
P35579	MYH9	Myosin-9	1.06828	0.0321871	0.0542662	47	0
Q7L311	ARMCX2	Armadillo repeat-containing X-linked protein 2	1.06813	0.0716169	0.00983511	5	89
Q9Y5K8	ATP6V1D	V-type proton ATPase subunit D	1.06803	0.0327097	0.0588807	47	0
Q96S52	PIGS	GPI transamidase component PIG-S	1.06755	0.0485818	0.182162	43	9
P50552	VASP	Vasodilator-stimulated phosphoprotein	1.06723	0.0698419	0.0162419	6	87
Q9NV31	IMP3	U3 small nucleolar ribonucleoprotein protein IMP3	1.06701	0.0415263	0.00520871	12	74
Q9HBH5	RDH14	Retinol dehydrogenase 14	1.06659	0.0460581	0.175048	45	4
Q9NUJ1	ABHD10	Mycophenolic acid acyl-glucuronide esterase, mitochondrial	1.06658	0.0414538	0.140708	47	0
Q8IZ07	ANKRD13A	Ankyrin repeat domain-containing protein 13A	1.06654	0.0408831	0.0107131	15	68
Q969H8	MYDGF	Myeloid-derived growth factor	1.06653	0.0408219	1.61408e-05	4	91
O14880	MGST3	Microsomal glutathione S-transferase 3	1.06626	0.0546946	0.265999	47	0
Q9Y277	VDAC3	Voltage-dependent anion-selective channel protein 3	1.0661	0.0379947	0.111998	47	0
Q9BXX0	EMILIN2	EMILIN-2	1.06576	0.0692981	0.0269928	7	85
Q9BY77	POLDIP3	Polymerase delta-interacting protein 3	1.06542	0.068637	0.00443211	4	91
Q9H0W9	C11orf54	Ester hydrolase C11orf54	1.06523	0.0427507	0.125031	39	17
P61421	ATP6V0D1	V-type proton ATPase subunit d 1	1.06517	0.0341277	0.081521	47	0
Q13045	FLII	Protein flightless-1 homolog	1.06511	0.0235942	0.0140905	47	0
Q9BVJ7	DUSP23	Dual specificity protein phosphatase 23	1.06482	0.0564216	0.0322413	11	77
P45954	ACADSB	Short/branched chain specific acyl-CoA dehydrogenase, mitochondrial	1.0646	0.0358343	0.0854695	43	9
Q9P2I0	CPSF2	Cleavage and polyadenylation specificity factor subunit 2	1.06437	0.0425996	0.0895181	31	34
O14976	GAK	Cyclin-G-associated kinase	1.06411	0.0357335	0.0764164	40	15
P21281	ATP6V1B2	V-type proton ATPase subunit B, brain isoform	1.06393	0.0247437	0.0207513	47	0
P17987	TCP1	T-complex protein 1 subunit alpha	1.06374	0.0271657	0.0341996	47	0
Q9NQT8	KIF13B	Kinesin-like protein KIF13B	1.06339	0.0358191	0.0694423	37	21
Q9HAV7	GRPEL1	GrpE protein homolog 1, mitochondrial	1.06319	0.0685899	0.147253	16	66
Q06787	FMR1	Synaptic functional regulator FMR1	1.06306	0.0380952	0.0229635	20	57
Q9H0E2	TOLLIP	Toll-interacting protein	1.06279	0.0330458	0.0674309	42	11
Q8WWM9	CYGB	Cytoglobin	1.06263	0.0843365	0.498701	47	0
Q86Y82	STX12	Syntaxin-12	1.06247	0.0311899	0.057247	43	9
Q9H8Y8	GORASP2	Golgi reassembly-stacking protein 2	1.06235	0.0302453	0.058467	46	2
P46108	CRK	Adapter molecule crk	1.06229	0.0373424	0.11483	44	6
Q08211	DHX9	ATP-dependent RNA helicase A	1.06227	0.0206491	0.00800172	47	0
Q8WW22	DNAJA4	DnaJ homolog subfamily A member 4	1.0622	0.0536708	0.121	22	53
Q16666	IFI16	Gamma-interferon-inducible protein 16	1.06196	0.0794346	0.47707	47	0
Q8N3U4	STAG2	Cohesin subunit SA-2	1.06195	0.0263343	0.0208689	39	17
P12694	BCKDHA	2-oxoisovalerate dehydrogenase subunit alpha, mitochondrial	1.06192	0.047925	0.000876071	5	89
Q14498	RBM39	RNA-binding protein 39	1.06188	0.0245647	0.0239371	47	0
Q9UKM9	RALY	RNA-binding protein Raly	1.06151	0.0366905	0.12457	47	0
Q8N1G4	LRRC47	Leucine-rich repeat-containing protein 47	1.0614	0.0231856	0.0181494	47	0
P50579	METAP2	Methionine aminopeptidase 2	1.0613	0.0345986	0.0764164	39	17
Q8NFD5	ARID1B	AT-rich interactive domain-containing protein 1B	1.0611	0.0744386	0.0701363	8	83
P20020	ATP2B1	Plasma membrane calcium-transporting ATPase 1	1.06106	0.0682895	0.0915423	11	77
O15270	SPTLC2	Serine palmitoyltransferase 2	1.06103	0.0550754	0.0305261	10	79
Q96C19	EFHD2	EF-hand domain-containing protein D2	1.06094	0.0656928	0.0304421	7	85
P62333	PSMC6	26S proteasome regulatory subunit 10B	1.06065	0.0196549	0.0068725	47	0
Q2NL82	TSR1	Pre-rRNA-processing protein TSR1 homolog	1.06031	0.0786811	0.0705829	7	85
P05455	SSB	Lupus La protein	1.06031	0.0198565	0.00769381	47	0
O95881	TXNDC12	Thioredoxin domain-containing protein 12	1.06018	0.0243618	0.0223385	44	6
Q16777	H2AC20	Histone H2A type 2-C	1.05999	0.0502429	0.00677006	7	85
Q96RQ9	IL4I1	L-amino-acid oxidase	1.05996	0.0869736	0.227834	13	72
Q14683	SMC1A	Structural maintenance of chromosomes protein 1A	1.05985	0.02587	0.0368257	47	0
P15374	UCHL3	Ubiquitin carboxyl-terminal hydrolase isozyme L3	1.05968	0.0481966	0.0542662	16	66
P07355	ANXA2	Annexin A2	1.05958	0.0338649	0.108111	47	0
Q92696	RABGGTA	Geranylgeranyl transferase type-2 subunit alpha	1.05936	0.0402688	0.0660319	25	47
Q14204	DYNC1H1	Cytoplasmic dynein 1 heavy chain 1	1.05924	0.0200892	0.00944169	47	0
Q9Y4E1	WASHC2C	WASH complex subunit 2C	1.05919	0.063727	0.190257	20	57
Q9HBL7	PLGRKT	Plasminogen receptor (KT)	1.05892	0.0733084	0.0586515	7	85
Q9Y3A6	TMED5	Transmembrane emp24 domain-containing protein 5	1.05888	0.0394304	0.151462	43	9
Q9HAV4	XPO5	Exportin-5	1.05869	0.0384354	0.110804	36	23
Q92572	AP3S1	AP-3 complex subunit sigma-1	1.05855	0.033379	0.0122563	18	62
Q6NVY1	HIBCH	3-hydroxyisobutyryl-CoA hydrolase, mitochondrial	1.05823	0.0317118	0.0936698	47	0
Q8N8A2	ANKRD44	Serine/threonine-protein phosphatase 6 regulatory ankyrin repeat subunit B	1.05823	0.0551277	0.0677278	13	72
Q96CV9	OPTN	Optineurin	1.05813	0.0594498	0.12457	16	66
Q7RTV0	PHF5A	PHD finger-like domain-containing protein 5A	1.05785	0.0739517	0.00683385	3	94
Q3YEC7	RABL6	Rab-like protein 6	1.05746	0.0288795	0.0535035	41	13
Q9Y3C4	TPRKB	EKC/KEOPS complex subunit TPRKB	1.0573	0.0448077	0.184897	37	21
Q9UBI6	GNG12	Guanine nucleotide-binding protein G(I)/G(S)/G(O) subunit gamma-12	1.05716	0.0669858	0.396867	40	15
P08962	CD63	CD63 antigen	1.05656	0.0680009	0.446671	47	0
Q9Y266	NUDC	Nuclear migration protein nudC	1.0564	0.01907	0.00941997	47	0
Q9H3N1	TMX1	Thioredoxin-related transmembrane protein 1	1.05622	0.0340251	0.101816	40	15
Q8N0X4	CLYBL	Citramalyl-CoA lyase, mitochondrial	1.05576	0.0371229	0.167448	47	0
Q969U7	PSMG2	Proteasome assembly chaperone 2	1.05566	0.0618511	0.0895949	11	77
P62318	SNRPD3	Small nuclear ribonucleoprotein Sm D3	1.05556	0.0452281	0.257598	47	0
Q9Y2Q5	LAMTOR2	Ragulator complex protein LAMTOR2	1.05537	0.057617	0.185841	21	55
P62942	FKBP1A	Peptidyl-prolyl cis-trans isomerase FKBP1A	1.05501	0.0644603	0.370396	36	23
Q9BVC6	TMEM109	Transmembrane protein 109	1.0546	0.0324985	0.12366	47	0
P10768	ESD	S-formylglutathione hydrolase	1.05408	0.0337735	0.141327	47	0
O76003	GLRX3	Glutaredoxin-3	1.05397	0.0362538	0.138577	40	15
Q7KZI7	MARK2	Serine/threonine-protein kinase MARK2	1.05378	0.0570442	0.161425	18	62
P54920	NAPA	Alpha-soluble NSF attachment protein	1.05374	0.0219529	0.0282645	47	0
Q96D15	RCN3	Reticulocalbin-3	1.05367	0.0556489	0.152057	18	62
P21266	GSTM3	Glutathione S-transferase Mu 3	1.05349	0.0865012	0.574681	47	0
Q5T011	SZT2	KICSTOR complex protein SZT2	1.05339	0.0479523	0.176559	27	43
O43427	FIBP	Acidic fibroblast growth factor intracellular-binding protein	1.05325	0.0366937	0.00879271	11	77
P62314	SNRPD1	Small nuclear ribonucleoprotein Sm D1	1.05322	0.0246602	0.0509452	47	0
Q9NVJ2	ARL8B	ADP-ribosylation factor-like protein 8B	1.05321	0.0288823	0.0860052	45	4
O75663	TIPRL	TIP41-like protein	1.053	0.0459728	0.0398439	12	74
P41208	CETN2	Centrin-2	1.05283	0.0501391	0.253441	34	28
Q8NEW0	SLC30A7	Zinc transporter 7	1.05271	0.0520221	0.0126239	6	87
O94901	SUN1	SUN domain-containing protein 1	1.05257	0.0421919	0.250853	47	0
Q9BRT3	MIEN1	Migration and invasion enhancer 1	1.05231	0.0499558	0.0236918	8	83
Q7Z3K3	POGZ	Pogo transposable element with ZNF domain	1.05219	0.0334563	0.0400479	22	53
P82933	MRPS9	28S ribosomal protein S9, mitochondrial	1.05218	0.0469131	0.176883	27	43
Q96AE4	FUBP1	Far upstream element-binding protein 1	1.05215	0.0320912	0.135955	47	0
P30153	PPP2R1A	Serine/threonine-protein phosphatase 2A 65 kDa regulatory subunit A alpha isoform	1.05214	0.019771	0.0192846	47	0
Q13825	AUH	Methylglutaconyl-CoA hydratase, mitochondrial	1.05175	0.0471375	0.158	24	49
P16435	POR	NADPH--cytochrome P450 reductase	1.05169	0.0407951	0.242867	47	0
Q8N1F8	STK11IP	Serine/threonine-protein kinase 11-interacting protein	1.05166	0.0558762	0.157749	17	64
Q86TV6	TTC7B	Tetratricopeptide repeat protein 7B	1.05154	0.0368655	0.142336	36	23
P29728	OAS2	2~-5~-oligoadenylate synthase 2	1.05142	0.0773318	0.335569	19	60
P07384	CAPN1	Calpain-1 catalytic subunit	1.05135	0.0182284	0.0132583	47	0
P21796	VDAC1	Voltage-dependent anion-selective channel protein 1	1.0511	0.0266275	0.0805632	47	0
P35475	IDUA	Alpha-L-iduronidase	1.0511	0.0825984	0.19298	9	81
Q00013	MPP1	55 kDa erythrocyte membrane protein	1.05087	0.0508875	0.271459	33	30
O60493	SNX3	Sorting nexin-3	1.05085	0.0383455	0.191102	41	13
O15131	KPNA5	Importin subunit alpha-6	1.05021	0.0396552	0.0435524	15	68
P26639	TARS1	Threonine--tRNA ligase 1, cytoplasmic	1.05021	0.0204914	0.0285457	47	0
Q14966	ZNF638	Zinc finger protein 638	1.05008	0.0575971	0.0565997	8	83
P19404	NDUFV2	NADH dehydrogenase [ubiquinone] flavoprotein 2, mitochondrial	1.04967	0.0333312	0.170681	47	0
O14647	CHD2	Chromodomain-helicase-DNA-binding protein 2	1.04955	0.0302887	0.000627039	7	85
Q8WWQ0	PHIP	PH-interacting protein	1.04943	0.0404453	0.0141511	9	81
Q8N442	GUF1	Translation factor GUF1, mitochondrial	1.04937	0.0460833	0.0841863	15	68
Q7L576	CYFIP1	Cytoplasmic FMR1-interacting protein 1	1.04935	0.0181086	0.016347	47	0
Q04837	SSBP1	Single-stranded DNA-binding protein, mitochondrial	1.04929	0.0488431	0.352846	47	0
P42858	HTT	Huntingtin	1.04912	0.030123	0.134968	47	0
Q96EY7	PTCD3	Pentatricopeptide repeat domain-containing protein 3, mitochondrial	1.04909	0.0320369	0.159134	47	0
P51570	GALK1	Galactokinase	1.04904	0.0333494	0.176167	47	0
Q96EB1	ELP4	Elongator complex protein 4	1.04897	0.0431435	0.0281568	10	79
P10155	RO60	60 kDa SS-A/Ro ribonucleoprotein	1.04881	0.0201127	0.0301473	47	0
Q9UI30	TRMT112	Multifunctional methyltransferase subunit TRM112-like protein	1.0487	0.0328157	0.13521	39	17
Q15147	PLCB4	1-phosphatidylinositol 4,5-bisphosphate phosphodiesterase beta-4	1.04857	0.0650513	0.484352	45	4
Q96QR8	PURB	Transcriptional activator protein Pur-beta	1.04829	0.0393773	0.257824	47	0
Q9UHY7	ENOPH1	Enolase-phosphatase E1	1.04807	0.028104	0.117794	47	0
P14550	AKR1A1	Aldo-keto reductase family 1 member A1	1.0478	0.0303291	0.14778	47	0
Q15843	NEDD8	NEDD8	1.04769	0.0369623	0.16332	34	28
Q5JPH6	EARS2	Probable glutamate--tRNA ligase, mitochondrial	1.04744	0.0491893	0.257415	29	38
O95299	NDUFA10	NADH dehydrogenase [ubiquinone] 1 alpha subcomplex subunit 10, mitochondrial	1.04717	0.0414834	0.294179	47	0
Q8IXI2	RHOT1	Mitochondrial Rho GTPase 1	1.04704	0.0314406	0.108792	34	28
P30740	SERPINB1	Leukocyte elastase inhibitor	1.04689	0.060062	0.474184	47	0
P50502	ST13	Hsc70-interacting protein	1.04685	0.0361863	0.232851	47	0
Q9Y276	BCS1L	Mitochondrial chaperone BCS1	1.04678	0.0286559	0.134745	47	0
P46063	RECQL	ATP-dependent DNA helicase Q1	1.04652	0.0425241	0.291393	43	9
Q8IY37	DHX37	Probable ATP-dependent RNA helicase DHX37	1.04593	0.0437601	0.0509344	11	77
O15355	PPM1G	Protein phosphatase 1G	1.04593	0.0487984	0.234231	25	47
Q9NUQ8	ABCF3	ATP-binding cassette sub-family F member 3	1.04576	0.0388771	0.161368	28	40
O95716	RAB3D	Ras-related protein Rab-3D	1.04567	0.0339757	0.215807	47	0
Q9GZT8	NIF3L1	NIF3-like protein 1	1.04564	0.0255587	0.103789	47	0
Q9P0J0	NDUFA13	NADH dehydrogenase [ubiquinone] 1 alpha subcomplex subunit 13	1.04551	0.0348939	0.229478	47	0
Q13155	AIMP2	Aminoacyl tRNA synthase complex-interacting multifunctional protein 2	1.04549	0.0614303	0.466851	41	13
Q9BX68	HINT2	Histidine triad nucleotide-binding protein 2, mitochondrial	1.0451	0.0567182	0.23624	18	62
P17568	NDUFB7	NADH dehydrogenase [ubiquinone] 1 beta subcomplex subunit 7	1.04501	0.0877101	0.251365	8	83
P07951	TPM2	Tropomyosin beta chain	1.04499	0.0975703	0.302341	8	83
Q53H96	PYCR3	Pyrroline-5-carboxylate reductase 3	1.04497	0.0392473	0.290518	47	0
Q86VP6	CAND1	Cullin-associated NEDD8-dissociated protein 1	1.04493	0.0201072	0.0450931	47	0
P56537	EIF6	Eukaryotic translation initiation factor 6	1.04489	0.0545246	0.449277	47	0
Q9BSH4	TACO1	Translational activator of cytochrome c oxidase 1	1.04487	0.0701242	0.154535	8	83
Q9Y3I0	RTCB	RNA-splicing ligase RtcB homolog	1.04475	0.0176499	0.0249744	47	0
O15118	NPC1	NPC intracellular cholesterol transporter 1	1.0446	0.0792462	0.208968	8	83
Q9P0K7	RAI14	Ankycorbin	1.04408	0.0301363	0.141006	39	17
Q9NVH1	DNAJC11	DnaJ homolog subfamily C member 11	1.04406	0.0253637	0.113349	47	0
O15162	PLSCR1	Phospholipid scramblase 1	1.04406	0.0777117	0.145641	6	87
Q15020	SART3	Squamous cell carcinoma antigen recognized by T-cells 3	1.04396	0.0426115	0.234027	30	36
Q9Y285	FARSA	Phenylalanine--tRNA ligase alpha subunit	1.04394	0.0295542	0.171961	47	0
Q15057	ACAP2	Arf-GAP with coiled-coil, ANK repeat and PH domain-containing protein 2	1.04355	0.0387459	0.0463489	12	74
P42126	ECI1	Enoyl-CoA delta isomerase 1, mitochondrial	1.04342	0.0389568	0.303518	47	0
Q9H0T7	RAB17	Ras-related protein Rab-17	1.04341	0.071605	0.268526	12	74
Q9Y5K5	UCHL5	Ubiquitin carboxyl-terminal hydrolase isozyme L5	1.0431	0.032696	0.224763	47	0
P52907	CAPZA1	F-actin-capping protein subunit alpha-1	1.04302	0.025043	0.117143	47	0
Q86W92	PPFIBP1	Liprin-beta-1	1.04297	0.0549817	0.217565	16	66
Q8NHU6	TDRD7	Tudor domain-containing protein 7	1.04292	0.0492093	0.194538	18	62
Q7L5D6	GET4	Golgi to ER traffic protein 4 homolog	1.04247	0.0423443	0.138083	18	62
Q5T6J7	IDNK	Probable gluconokinase	1.0424	0.0605506	0.121427	8	83
P19634	SLC9A1	Sodium/hydrogen exchanger 1	1.04199	0.112027	0.403653	8	83
Q9H7B4	SMYD3	Histone-lysine N-methyltransferase SMYD3	1.04173	0.0714799	0.135194	6	87
P24928	POLR2A	DNA-directed RNA polymerase II subunit RPB1	1.04171	0.0409023	0.347198	47	0
Q9UL41	PNMA3	Paraneoplastic antigen Ma3	1.04158	0.03463	0.268232	47	0
Q9UQ90	SPG7	Paraplegin	1.04154	0.0492477	0.0810893	9	81
Q16891	IMMT	MICOS complex subunit MIC60	1.04132	0.0228686	0.100944	47	0
O00148	DDX39A	ATP-dependent RNA helicase DDX39A	1.04115	0.0491315	0.441591	47	0
Q96RL7	VPS13A	Vacuolar protein sorting-associated protein 13A	1.04115	0.0531796	0.125875	10	79
Q9BZF1	OSBPL8	Oxysterol-binding protein-related protein 8	1.04069	0.0389511	0.330197	46	2
Q9BVG4	PBDC1	Protein PBDC1	1.04066	0.032134	0.184226	36	23
Q9NS86	LANCL2	LanC-like protein 2	1.04066	0.0309809	0.227094	47	0
Q05048	CSTF1	Cleavage stimulation factor subunit 1	1.04045	0.0438809	0.0589295	9	81
P11766	ADH5	Alcohol dehydrogenase class-3	1.04015	0.0327052	0.257598	47	0
Q6NUQ4	TMEM214	Transmembrane protein 214	1.03995	0.0472032	0.169778	15	68
Q9Y6W5	WASF2	Wiskott-Aldrich syndrome protein family member 2	1.0398	0.0458111	0.22062	20	57
Q13148	TARDBP	TAR DNA-binding protein 43	1.03978	0.027419	0.182952	47	0
O14818	PSMA7	Proteasome subunit alpha type-7	1.03874	0.0224552	0.116913	47	0
P56192	MARS1	Methionine--tRNA ligase, cytoplasmic	1.03867	0.0263529	0.17826	47	0
Q8IXT5	RBM12B	RNA-binding protein 12B	1.03858	0.0444116	0.118119	12	74
P56134	ATP5MF	ATP synthase subunit f, mitochondrial	1.03847	0.0342896	0.300787	47	0
O15327	INPP4B	Inositol polyphosphate 4-phosphatase type II	1.03843	0.0512533	0.0800893	7	85
Q86U38	NOP9	Nucleolar protein 9	1.03843	0.0724691	0.403504	16	66
Q9HD26	GOPC	Golgi-associated PDZ and coiled-coil motif-containing protein	1.03807	0.0633787	0.0960253	5	89
O00186	STXBP3	Syntaxin-binding protein 3	1.03801	0.0235065	0.140005	47	0
Q9UIV1	CNOT7	CCR4-NOT transcription complex subunit 7	1.038	0.0268124	0.0283356	15	68
P25787	PSMA2	Proteasome subunit alpha type-2	1.03795	0.0348383	0.315285	47	0
O75400	PRPF40A	Pre-mRNA-processing factor 40 homolog A	1.03787	0.0353771	0.318483	46	2
Q14257	RCN2	Reticulocalbin-2	1.03778	0.04468	0.437013	47	0
Q93008	USP9X	Probable ubiquitin carboxyl-terminal hydrolase FAF-X	1.03764	0.0189142	0.0741325	47	0
Q8WW59	SPRYD4	SPRY domain-containing protein 4	1.0376	0.0343681	0.249892	36	23
O95182	NDUFA7	NADH dehydrogenase [ubiquinone] 1 alpha subcomplex subunit 7	1.03752	0.065711	0.175403	7	85
P42229	STAT5A	Signal transducer and activator of transcription 5A	1.03745	0.0337282	0.249412	37	21
O00410	IPO5	Importin-5	1.03732	0.0143006	0.0237471	47	0
P49914	MTHFS	5-formyltetrahydrofolate cyclo-ligase	1.03725	0.0372302	0.140358	18	62
Q8IUR0	TRAPPC5	Trafficking protein particle complex subunit 5	1.03725	0.0481213	0.379997	31	34
Q16537	PPP2R5E	Serine/threonine-protein phosphatase 2A 56 kDa regulatory subunit epsilon isoform	1.03721	0.0525166	0.480386	40	15
P61163	ACTR1A	Alpha-centractin	1.03712	0.0370748	0.356011	47	0
O14908	GIPC1	PDZ domain-containing protein GIPC1	1.03702	0.0599128	0.296583	14	70
O75643	SNRNP200	U5 small nuclear ribonucleoprotein 200 kDa helicase	1.0369	0.0180574	0.0677199	47	0
P62258	YWHAE	14-3-3 protein epsilon	1.03682	0.0291571	0.245309	47	0
Q9H0D6	XRN2	5~-3~ exoribonuclease 2	1.03674	0.0229511	0.144272	47	0
Q15629	TRAM1	Translocating chain-associated membrane protein 1	1.03649	0.132007	0.53992	8	83
P26006	ITGA3	Integrin alpha-3	1.03635	0.0681788	0.626571	47	0
Q9H553	ALG2	Alpha-1,3/1,6-mannosyltransferase ALG2	1.03581	0.0447294	0.116222	10	79
Q96JJ3	ELMO2	Engulfment and cell motility protein 2	1.0357	0.0388157	0.325982	35	26
Q9H6R3	ACSS3	Acyl-CoA synthetase short-chain family member 3, mitochondrial	1.03552	0.0475147	0.35429	26	45
Q3SY69	ALDH1L2	Mitochondrial 10-formyltetrahydrofolate dehydrogenase	1.0352	0.0729593	0.65965	47	0
Q99627	COPS8	COP9 signalosome complex subunit 8	1.03498	0.0254356	0.188255	43	9
P61201	COPS2	COP9 signalosome complex subunit 2	1.03495	0.0212988	0.136012	47	0
Q09028	RBBP4	Histone-binding protein RBBP4	1.0347	0.0258337	0.17772	39	17
P42356	PI4KA	Phosphatidylinositol 4-kinase alpha	1.03459	0.0333229	0.338807	47	0
Q6UVK1	CSPG4	Chondroitin sulfate proteoglycan 4	1.03428	0.0378611	0.40495	47	0
Q5VYK3	ECPAS	Proteasome adapter and scaffold protein ECM29	1.03425	0.0356945	0.376985	47	0
Q9P2R7	SUCLA2	Succinate--CoA ligase [ADP-forming] subunit beta, mitochondrial	1.03397	0.0355423	0.37892	47	0
P39687	ANP32A	Acidic leucine-rich nuclear phosphoprotein 32 family member A	1.03369	0.0334043	0.352846	47	0
P54577	YARS1	Tyrosine--tRNA ligase, cytoplasmic	1.03338	0.0262247	0.242615	47	0
Q12974	PTP4A2	Protein tyrosine phosphatase type IVA 2	1.03328	0.0561766	0.445967	24	49
Q9BT78	COPS4	COP9 signalosome complex subunit 4	1.03324	0.0285707	0.284701	47	0
O00422	SAP18	Histone deacetylase complex subunit SAP18	1.03322	0.0496691	0.48238	36	23
O15305	PMM2	Phosphomannomutase 2	1.03312	0.0452268	0.0493498	5	89
P46734	MAP2K3	Dual specificity mitogen-activated protein kinase kinase 3	1.03309	0.049722	0.0704322	5	89
Q15233	NONO	Non-POU domain-containing octamer-binding protein	1.03299	0.0231206	0.192332	47	0
P56556	NDUFA6	NADH dehydrogenase [ubiquinone] 1 alpha subcomplex subunit 6	1.03223	0.0574945	0.361121	15	68
Q7Z4Q2	HEATR3	HEAT repeat-containing protein 3	1.03116	0.0492929	0.303488	15	68
P35250	RFC2	Replication factor C subunit 2	1.03115	0.0519015	0.275618	12	74
Q15717	ELAVL1	ELAV-like protein 1	1.03108	0.0505821	0.574594	47	0
Q8WWY3	PRPF31	U4/U6 small nuclear ribonucleoprotein Prp31	1.03084	0.0247014	0.237584	44	6
Q9UH62	ARMCX3	Armadillo repeat-containing X-linked protein 3	1.03076	0.0565998	0.564702	35	26
P04439	HLA-A	HLA class I histocompatibility antigen, A alpha chain	1.03058	0.0571169	0.625344	47	0
Q9H7Z7	PTGES2	Prostaglandin E synthase 2	1.03046	0.0350896	0.404504	43	9
P52815	MRPL12	39S ribosomal protein L12, mitochondrial	1.03022	0.049335	0.575529	47	0
Q92614	MYO18A	Unconventional myosin-XVIIIa	1.03022	0.0368719	0.450831	47	0
O14672	ADAM10	Disintegrin and metalloproteinase domain-containing protein 10	1.02995	0.0452689	0.249786	13	72
Q96CT7	CCDC124	Coiled-coil domain-containing protein 124	1.02992	0.0531364	0.561754	37	21
O75438	NDUFB1	NADH dehydrogenase [ubiquinone] 1 beta subcomplex subunit 1	1.02984	0.0646124	0.562649	25	47
Q02809	PLOD1	Procollagen-lysine,2-oxoglutarate 5-dioxygenase 1	1.02978	0.0455315	0.379552	22	53
P24557	TBXAS1	Thromboxane-A synthase	1.02962	0.0591574	0.625012	41	13
Q9Y3L3	SH3BP1	SH3 domain-binding protein 1	1.02961	0.0405429	0.449227	37	21
Q9BY50	SEC11C	Signal peptidase complex catalytic subunit SEC11C	1.02956	0.0509925	0.173739	7	85
Q13126	MTAP	S-methyl-5~-thioadenosine phosphorylase	1.0294	0.0427969	0.528998	47	0
Q9NY65	TUBA8	Tubulin alpha-8 chain	1.02922	0.0748172	0.68428	36	23
Q12913	PTPRJ	Receptor-type tyrosine-protein phosphatase eta	1.02909	0.0530841	0.582547	39	17
P16949	STMN1	Stathmin	1.02904	0.0668557	0.691558	47	0
Q07960	ARHGAP1	Rho GTPase-activating protein 1	1.02896	0.0321209	0.407588	47	0
Q5JTV8	TOR1AIP1	Torsin-1A-interacting protein 1	1.02888	0.0294431	0.367716	47	0
P07858	CTSB	Cathepsin B	1.02865	0.0562046	0.64136	47	0
Q9H7D7	WDR26	WD repeat-containing protein 26	1.02839	0.0316619	0.389538	43	9
P47897	QARS1	Glutamine--tRNA ligase	1.02811	0.0209278	0.22203	47	0
P67870	CSNK2B	Casein kinase II subunit beta	1.02785	0.0339001	0.413491	40	15
P36551	CPOX	Oxygen-dependent coproporphyrinogen-III oxidase, mitochondrial	1.02779	0.041997	0.0771885	5	89
Q99735	MGST2	Microsomal glutathione S-transferase 2	1.02762	0.0881411	0.720327	30	36
Q9NUB1	ACSS1	Acetyl-coenzyme A synthetase 2-like, mitochondrial	1.02753	0.0832692	0.487833	9	81
O00231	PSMD11	26S proteasome non-ATPase regulatory subunit 11	1.02749	0.0219162	0.252784	47	0
P15586	GNS	N-acetylglucosamine-6-sulfatase	1.02747	0.0513499	0.625344	47	0
O14662	STX16	Syntaxin-16	1.02744	0.0802031	0.623814	19	60
O15455	TLR3	Toll-like receptor 3	1.02743	0.0495179	0.446671	21	55
P53396	ACLY	ATP-citrate synthase	1.02728	0.0242234	0.302341	47	0
Q9BUQ8	DDX23	Probable ATP-dependent RNA helicase DDX23	1.02717	0.0303909	0.412179	47	0
Q7Z406	MYH14	Myosin-14	1.0271	0.0291314	0.393672	47	0
Q8NFH4	NUP37	Nucleoporin Nup37	1.02639	0.0382765	0.463457	35	26
Q9Y2G3	ATP11B	Probable phospholipid-transporting ATPase IF	1.02602	0.0886371	0.62383	14	70
P28331	NDUFS1	NADH-ubiquinone oxidoreductase 75 kDa subunit, mitochondrial	1.02584	0.0347717	0.495218	47	0
Q9UNS2	COPS3	COP9 signalosome complex subunit 3	1.0253	0.0254547	0.36304	47	0
Q9ULD0	OGDHL	2-oxoglutarate dehydrogenase-like, mitochondrial	1.02525	0.121316	0.559818	5	89
Q86U86	PBRM1	Protein polybromo-1	1.02521	0.0668685	0.334958	6	87
Q9BRQ8	AIFM2	Ferroptosis suppressor protein 1	1.02518	0.074799	0.423862	7	85
Q04760	GLO1	Lactoylglutathione lyase	1.02516	0.0440307	0.602383	47	0
Q96QE2	SLC2A13	Proton myo-inositol cotransporter	1.02493	0.0610726	0.567401	20	57
P54619	PRKAG1	5~-AMP-activated protein kinase subunit gamma-1	1.02487	0.0249579	0.36214	47	0
Q14980	NUMA1	Nuclear mitotic apparatus protein 1	1.02463	0.0309028	0.465017	47	0
O75521	ECI2	Enoyl-CoA delta isomerase 2	1.02454	0.0294962	0.445967	47	0
P17900	GM2A	Ganglioside GM2 activator	1.02383	0.0521664	0.676756	47	0
O75131	CPNE3	Copine-3	1.02376	0.0290865	0.45415	47	0
O00267	SUPT5H	Transcription elongation factor SPT5	1.02341	0.0427809	0.597643	42	11
Q29RF7	PDS5A	Sister chromatid cohesion protein PDS5 homolog A	1.02322	0.0376071	0.419772	23	51
Q9P2J5	LARS1	Leucine--tRNA ligase, cytoplasmic	1.02322	0.0210357	0.31558	47	0
Q9P000	COMMD9	COMM domain-containing protein 9	1.02318	0.035403	0.526483	42	11
Q9NYU2	UGGT1	UDP-glucose:glycoprotein glucosyltransferase 1	1.02302	0.0253118	0.406361	47	0
Q9Y5S1	TRPV2	Transient receptor potential cation channel subfamily V member 2	1.02294	0.0744079	0.62915	16	66
O43312	MTSS1	Protein MTSS 1	1.02287	0.0546068	0.547194	19	60
P54578	USP14	Ubiquitin carboxyl-terminal hydrolase 14	1.02281	0.0293938	0.477609	47	0
O75367	MACROH2A1	Core histone macro-H2A.1	1.02233	0.044044	0.643089	47	0
O60684	KPNA6	Importin subunit alpha-7	1.02229	0.046702	0.42449	14	70
Q92520	FAM3C	Protein FAM3C	1.02191	0.0279776	0.46936	46	2
Q9H0R4	HDHD2	Haloacid dehalogenase-like hydrolase domain-containing protein 2	1.02095	0.0424151	0.637054	43	9
Q14240	EIF4A2	Eukaryotic initiation factor 4A-II	1.02086	0.0389905	0.625507	47	0
P23381	WARS1	Tryptophan--tRNA ligase, cytoplasmic	1.02063	0.0668407	0.778328	47	0
Q9UMX5	NENF	Neudesin	1.02052	0.0504367	0.630079	28	40
O14656	TOR1A	Torsin-1A	1.02048	0.0376382	0.330837	12	74
P48729	CSNK1A1	Casein kinase I isoform alpha	1.02013	0.0227446	0.421139	47	0
Q16740	CLPP	ATP-dependent Clp protease proteolytic subunit, mitochondrial	1.01971	0.0705822	0.68865	19	60
P49591	SARS1	Serine--tRNA ligase, cytoplasmic	1.01963	0.0260999	0.492955	47	0
O75923	DYSF	Dysferlin	1.01943	0.0822511	0.623595	9	81
O95155	UBE4B	Ubiquitin conjugation factor E4 B	1.01921	0.0411433	0.643816	40	15
P10412	H1-4	Histone H1.4	1.01913	0.118725	0.886413	47	0
P08240	SRPRA	Signal recognition particle receptor subunit alpha	1.01896	0.0450657	0.684985	42	11
Q8TDZ2	MICAL1	[F-actin]-monooxygenase MICAL1	1.01843	0.0573454	0.769365	47	0
P62979	RPS27A	Ubiquitin-40S ribosomal protein S27a	1.0184	0.0263	0.524725	47	0
P28370	SMARCA1	Probable global transcription activator SNF2L1	1.01791	0.0347792	0.450831	18	62
P14314	PRKCSH	Glucosidase 2 subunit beta	1.01774	0.0282752	0.568643	47	0
Q5H9R7	PPP6R3	Serine/threonine-protein phosphatase 6 regulatory subunit 3	1.01755	0.0483531	0.741205	47	0
P04844	RPN2	Dolichyl-diphosphooligosaccharide--protein glycosyltransferase subunit 2	1.0172	0.0216528	0.47229	47	0
Q9BXP2	SLC12A9	Solute carrier family 12 member 9	1.01639	0.0480262	0.75596	47	0
Q8WUW1	BRK1	Protein BRICK1	1.01639	0.0402613	0.52799	16	66
Q9Y316	MEMO1	Protein MEMO1	1.01606	0.0580346	0.735164	26	45
P13987	CD59	CD59 glycoprotein	1.01605	0.0521714	0.778665	47	0
O15160	POLR1C	DNA-directed RNA polymerases I and III subunit RPAC1	1.01579	0.0505033	0.751735	38	19
Q9UNH7	SNX6	Sorting nexin-6	1.01579	0.0255699	0.576259	47	0
Q14653	IRF3	Interferon regulatory factor 3	1.01573	0.0415025	0.412703	8	83
Q9ULK4	MED23	Mediator of RNA polymerase II transcription subunit 23	1.01566	0.0501753	0.591298	13	72
P09960	LTA4H	Leukotriene A-4 hydrolase	1.0154	0.0387921	0.717118	47	0
P35610	SOAT1	Sterol O-acyltransferase 1	1.01538	0.055077	0.66321	16	66
Q5T1M5	FKBP15	FK506-binding protein 15	1.01536	0.0255441	0.586724	47	0
O43633	CHMP2A	Charged multivesicular body protein 2a	1.01514	0.0497812	0.506723	8	83
Q96E11	MRRF	Ribosome-recycling factor, mitochondrial	1.01461	0.0512143	0.745364	30	36
P49903	SEPHS1	Selenide, water dikinase 1	1.01398	0.0306163	0.67849	47	0
P10253	GAA	Lysosomal alpha-glucosidase	1.01355	0.0500459	0.805119	47	0
P38606	ATP6V1A	V-type proton ATPase catalytic subunit A	1.01349	0.0274482	0.655993	47	0
P62195	PSMC5	26S proteasome regulatory subunit 8	1.01317	0.0186918	0.529375	47	0
Q86VR2	RETREG3	Reticulophagy regulator 3	1.01304	0.055239	0.554697	6	87
Q7Z6Z7	HUWE1	E3 ubiquitin-protein ligase HUWE1	1.01304	0.0241805	0.626571	47	0
Q8IUR7	ARMC8	Armadillo repeat-containing protein 8	1.0127	0.0544464	0.77876	27	43
Q86X83	COMMD2	COMM domain-containing protein 2	1.01223	0.0412402	0.712053	25	47
P06241	FYN	Tyrosine-protein kinase Fyn	1.01219	0.148459	0.798077	4	91
P56377	AP1S2	AP-1 complex subunit sigma-2	1.01198	0.0318458	0.733571	47	0
P61011	SRP54	Signal recognition particle 54 kDa protein	1.01181	0.0327656	0.743985	47	0
Q99829	CPNE1	Copine-1	1.01139	0.0483514	0.830476	47	0
Q9BUR5	APOO	MICOS complex subunit MIC26	1.01113	0.0403176	0.801768	47	0
O95486	SEC24A	Protein transport protein Sec24A	1.01109	0.0510833	0.81925	35	26
P09874	PARP1	Poly [ADP-ribose] polymerase 1	1.01106	0.036847	0.784765	47	0
P13667	PDIA4	Protein disulfide-isomerase A4	1.01093	0.0344653	0.773446	47	0
Q9UPU5	USP24	Ubiquitin carboxyl-terminal hydrolase 24	1.0104	0.032316	0.752617	40	15
Q86X76	NIT1	Deaminated glutathione amidase	1.01038	0.0212919	0.612118	34	28
P17643	TYRP1	5,6-dihydroxyindole-2-carboxylic acid oxidase	1.01025	0.0917997	0.921214	47	0
P13674	P4HA1	Prolyl 4-hydroxylase subunit alpha-1	1.01016	0.0424467	0.82806	47	0
Q9H4I3	TRABD	TraB domain-containing protein	1.00964	0.0336914	0.618448	12	74
O95425	SVIL	Supervillin	1.00935	0.0620969	0.756396	9	81
O75153	CLUH	Clustered mitochondria protein homolog	1.00935	0.0394729	0.808862	37	21
Q6P2Q9	PRPF8	Pre-mRNA-processing-splicing factor 8	1.00884	0.0213818	0.711547	47	0
O75396	SEC22B	Vesicle-trafficking protein SEC22b	1.00882	0.0385648	0.836211	47	0
Q01650	SLC7A5	Large neutral amino acids transporter small subunit 1	1.00805	0.0581611	0.902472	47	0
Q96EY8	MMAB	Corrinoid adenosyltransferase	1.00774	0.0648456	0.794588	8	83
Q13618	CUL3	Cullin-3	1.00757	0.0200461	0.737596	47	0
P06753	TPM3	Tropomyosin alpha-3 chain	1.00754	0.0544635	0.902472	47	0
A6NHR9	SMCHD1	Structural maintenance of chromosomes flexible hinge domain-containing protein 1	1.0075	0.0461593	0.741619	9	81
Q9P2E9	RRBP1	Ribosome-binding protein 1	1.00737	0.0283594	0.815091	47	0
Q9Y463	DYRK1B	Dual specificity tyrosine-phosphorylation-regulated kinase 1B	1.00711	0.181263	0.890694	3	94
P61803	DAD1	Dolichyl-diphosphooligosaccharide--protein glycosyltransferase subunit DAD1	1.00708	0.0374917	0.86411	46	2
Q14974	KPNB1	Importin subunit beta-1	1.00653	0.0204526	0.776781	47	0
Q6UXN9	WDR82	WD repeat-containing protein 82	1.00624	0.0550654	0.826009	10	79
Q14258	TRIM25	E3 ubiquitin/ISG15 ligase TRIM25	1.00577	0.0288078	0.858552	47	0
Q96JJ7	TMX3	Protein disulfide-isomerase TMX3	1.00561	0.0283085	0.860078	47	0
Q8NDH3	NPEPL1	Probable aminopeptidase NPEPL1	1.00544	0.0420574	0.909101	47	0
Q92882	OSTF1	Osteoclast-stimulating factor 1	1.00543	0.0382817	0.895858	43	9
O14618	CCS	Copper chaperone for superoxide dismutase	1.00516	0.0395878	0.908803	47	0
Q14254	FLOT2	Flotillin-2	1.00469	0.026704	0.877264	47	0
Q9NP66	HMG20A	High mobility group protein 20A	1.00469	0.0468154	0.855243	11	77
O14737	PDCD5	Programmed cell death protein 5	1.00463	0.0519429	0.936313	47	0
Q70CQ2	USP34	Ubiquitin carboxyl-terminal hydrolase 34	1.00445	0.0687508	0.861281	5	89
Q96BI1	SLC22A18	Solute carrier family 22 member 18	1.00441	0.0755301	0.894756	7	85
Q9Y5S9	RBM8A	RNA-binding protein 8A	1.00435	0.0433187	0.929443	47	0
Q15459	SF3A1	Splicing factor 3A subunit 1	1.00435	0.0254898	0.881325	47	0
Q9NXE4	SMPD4	Sphingomyelin phosphodiesterase 4	1.00424	0.0647742	0.935502	24	49
Q8WXF1	PSPC1	Paraspeckle component 1	1.00424	0.0287642	0.89705	47	0
O60832	DKC1	H/ACA ribonucleoprotein complex subunit DKC1	1.00424	0.0363046	0.918227	47	0
P41226	UBA7	Ubiquitin-like modifier-activating enzyme 7	1.00393	0.0775879	0.936254	15	68
Q9BY44	EIF2A	Eukaryotic translation initiation factor 2A	1.00391	0.0460906	0.935502	40	15
O14972	VPS26C	Vacuolar protein sorting-associated protein 26C	1.00378	0.0361114	0.906008	28	40
Q4KMQ2	ANO6	Anoctamin-6	1.00337	0.0617851	0.89477	6	87
A1L0T0	ILVBL	2-hydroxyacyl-CoA lyase 2	1.00278	0.0303477	0.935884	47	0
Q96HE7	ERO1A	ERO1-like protein alpha	1.00268	0.0360361	0.948191	47	0
Q16762	TST	Thiosulfate sulfurtransferase	1.00259	0.0382288	0.953085	47	0
Q9NTJ4	MAN2C1	Alpha-mannosidase 2C1	1.00208	0.0467822	0.966906	43	9
P42345	MTOR	Serine/threonine-protein kinase mTOR	1.00206	0.0213794	0.933993	47	0
O43390	HNRNPR	Heterogeneous nuclear ribonucleoprotein R	1.00202	0.0342251	0.959167	47	0
P51114	FXR1	Fragile X mental retardation syndrome-related protein 1	1.00202	0.0381877	0.961238	42	11
P28827	PTPRM	Receptor-type tyrosine-protein phosphatase mu	1.0017	0.0638314	0.964849	13	72
O75533	SF3B1	Splicing factor 3B subunit 1	1.00091	0.0188291	0.966892	47	0
P27797	CALR	Calreticulin	1.00033	0.0260233	0.992109	47	0
Q99460	PSMD1	26S proteasome non-ATPase regulatory subunit 1	1.00025	0.0212618	0.992809	47	0
P61923	COPZ1	Coatomer subunit zeta-1	1.0002	0.0390377	0.996932	47	0
Q96PH1	NOX5	NADPH oxidase 5	1.00004	0.134063	0.999555	11	77
P19474	TRIM21	E3 ubiquitin-protein ligase TRIM21	0.999976	0.043795	0.999555	32	32
Q16851	UGP2	UTP--glucose-1-phosphate uridylyltransferase	0.999955	0.0279899	0.999232	47	0
Q8WUM0	NUP133	Nuclear pore complex protein Nup133	0.999885	0.0236926	0.996932	47	0
Q96T76	MMS19	MMS19 nucleotide excision repair protein homolog	0.999838	0.0292198	0.996932	47	0
Q93091	RNASE6	Ribonuclease K6	0.9998	0.0698144	0.996932	16	66
Q8NBF2	NHLRC2	NHL repeat-containing protein 2	0.999749	0.0267768	0.994298	47	0
O75334	PPFIA2	Liprin-alpha-2	0.999646	0.0475626	0.990599	11	77
Q9Y3I1	FBXO7	F-box only protein 7	0.999563	0.0361207	0.991853	39	17
Q96EP5	DAZAP1	DAZ-associated protein 1	0.999372	0.0237018	0.982306	46	2
Q9ULH1	ASAP1	Arf-GAP with SH3 domain, ANK repeat and PH domain-containing protein 1	0.998978	0.0590155	0.988343	43	9
Q9BU23	LMF2	Lipase maturation factor 2	0.998948	0.041006	0.982561	47	0
Q8N257	H2BU1	Histone H2B type 3-B	0.998841	0.0612064	0.980331	20	57
P19388	POLR2E	DNA-directed RNA polymerases I, II, and III subunit RPABC1	0.998744	0.0264551	0.966892	47	0
P18031	PTPN1	Tyrosine-protein phosphatase non-receptor type 1	0.998711	0.0291538	0.967293	43	9
O14678	ABCD4	Lysosomal cobalamin transporter ABCD4	0.998605	0.0677097	0.97358	14	70
Q6VY07	PACS1	Phosphofurin acidic cluster sorting protein 1	0.998461	0.0296222	0.960904	39	17
Q6UW02	CYP20A1	Cytochrome P450 20A1	0.998294	0.0308497	0.955522	34	28
P63220	RPS21	40S ribosomal protein S21	0.998263	0.0510763	0.966063	23	51
O14950	MYL12B	Myosin regulatory light chain 12B	0.998122	0.0369685	0.964754	47	0
O75351	VPS4B	Vacuolar protein sorting-associated protein 4B	0.997958	0.0413197	0.964705	44	6
Q5T6V5	C9orf64	Queuosine salvage protein	0.997713	0.0382238	0.958634	47	0
Q92499	DDX1	ATP-dependent RNA helicase DDX1	0.997507	0.0215107	0.920279	47	0
Q92542	NCSTN	Nicastrin	0.99733	0.0377163	0.950734	47	0
P49756	RBM25	RNA-binding protein 25	0.996928	0.0236608	0.910024	47	0
P28068	HLA-DMB	HLA class II histocompatibility antigen, DM beta chain	0.99638	0.0695378	0.906032	7	85
P61081	UBE2M	NEDD8-conjugating enzyme Ubc12	0.99617	0.0363676	0.925645	47	0
P20042	EIF2S2	Eukaryotic translation initiation factor 2 subunit 2	0.996038	0.0664985	0.958634	47	0
Q14728	MFSD10	Major facilitator superfamily domain-containing protein 10	0.995975	0.114349	0.923955	5	89
P11717	IGF2R	Cation-independent mannose-6-phosphate receptor	0.995791	0.0468246	0.935884	47	0
P30040	ERP29	Endoplasmic reticulum resident protein 29	0.995782	0.0362478	0.918227	47	0
P08581	MET	Hepatocyte growth factor receptor	0.995451	0.0400042	0.917483	44	6
P28074	PSMB5	Proteasome subunit beta type-5	0.995289	0.0645004	0.935884	31	34
Q9Y673	ALG5	Dolichyl-phosphate beta-glucosyltransferase	0.994972	0.0545876	0.932858	44	6
Q15102	PAFAH1B3	Platelet-activating factor acetylhydrolase IB subunit gamma	0.994739	0.0231789	0.839032	47	0
O00160	MYO1F	Unconventional myosin-If	0.994553	0.0587161	0.924769	36	23
Q8IUX7	AEBP1	Adipocyte enhancer-binding protein 1	0.994464	0.0480286	0.894756	28	40
Q969G3	SMARCE1	SWI/SNF-related matrix-associated actin-dependent regulator of chromatin subfamily E member 1	0.993965	0.0436088	0.852614	21	55
O75155	CAND2	Cullin-associated NEDD8-dissociated protein 2	0.993753	0.0552831	0.913176	40	15
Q8TB37	NUBPL	Iron-sulfur protein NUBPL	0.993607	0.0274758	0.824465	42	11
O95747	OXSR1	Serine/threonine-protein kinase OSR1	0.993387	0.0259321	0.818058	47	0
O95336	PGLS	6-phosphogluconolactonase	0.993306	0.0312656	0.846722	47	0
O76014	KRT37	Keratin, type I cuticular Ha7	0.992657	0.124	0.870111	5	89
Q9BSJ8	ESYT1	Extended synaptotagmin-1	0.992591	0.0311291	0.828647	47	0
Q9H9Y2	RPF1	Ribosome production factor 1	0.9924	0.135661	0.862119	4	91
Q9H2H8	PPIL3	Peptidyl-prolyl cis-trans isomerase-like 3	0.992091	0.0800088	0.922818	39	17
P53004	BLVRA	Biliverdin reductase A	0.991932	0.0287939	0.798787	47	0
Q9Y291	MRPS33	28S ribosomal protein S33, mitochondrial	0.991755	0.107403	0.810423	4	91
P12268	IMPDH2	Inosine-5~-monophosphate dehydrogenase 2	0.991206	0.0315182	0.798787	47	0
P62304	SNRPE	Small nuclear ribonucleoprotein E	0.991099	0.0292636	0.780906	47	0
Q14103	HNRNPD	Heterogeneous nuclear ribonucleoprotein D0	0.991049	0.0550558	0.884149	47	0
Q9Y315	DERA	Deoxyribose-phosphate aldolase	0.99065	0.0248191	0.732968	47	0
P53618	COPB1	Coatomer subunit beta	0.99045	0.0161691	0.601749	47	0
Q8NDA8	MROH1	Maestro heat-like repeat-containing protein family member 1	0.990055	0.0398377	0.819198	47	0
P40855	PEX19	Peroxisomal biogenesis factor 19	0.990052	0.0418532	0.827755	47	0
P05067	APP	Amyloid-beta precursor protein	0.990018	0.0624075	0.739543	9	81
O95202	LETM1	Mitochondrial proton/calcium exchanger protein	0.989955	0.03129	0.769	47	0
Q9BXP5	SRRT	Serrate RNA effector molecule homolog	0.989906	0.0637757	0.88696	47	0
P48651	PTDSS1	Phosphatidylserine synthase 1	0.989776	0.0938695	0.759621	5	89
Q16881	TXNRD1	Thioredoxin reductase 1, cytoplasmic	0.989762	0.0333772	0.778353	47	0
Q641Q2	WASHC2A	WASH complex subunit 2A	0.989652	0.0624217	0.838274	26	45
Q02318	CYP27A1	Sterol 26-hydroxylase, mitochondrial	0.989395	0.0421285	0.804517	41	13
P40121	CAPG	Macrophage-capping protein	0.989376	0.0856183	0.911493	47	0
Q9Y3B3	TMED7	Transmembrane emp24 domain-containing protein 7	0.989154	0.0310264	0.74131	44	6
P05549	TFAP2A	Transcription factor AP-2-alpha	0.988914	0.0577725	0.796747	22	53
P25685	DNAJB1	DnaJ homolog subfamily B member 1	0.988807	0.0347985	0.765133	46	2
O43847	NRDC	Nardilysin	0.988715	0.0472333	0.789965	32	32
P49755	TMED10	Transmembrane emp24 domain-containing protein 10	0.98861	0.0361928	0.772427	47	0
Q96QK1	VPS35	Vacuolar protein sorting-associated protein 35	0.988096	0.0176728	0.545567	47	0
Q9Y6B6	SAR1B	GTP-binding protein SAR1b	0.987979	0.0258051	0.637054	38	19
Q53GL7	PARP10	Protein mono-ADP-ribosyltransferase PARP10	0.987938	0.0577129	0.691725	11	77
Q16611	BAK1	Bcl-2 homologous antagonist/killer	0.987796	0.0618173	0.748173	15	68
P22059	OSBP	Oxysterol-binding protein 1	0.987765	0.0227944	0.625344	47	0
Q9UJY5	GGA1	ADP-ribosylation factor-binding protein GGA1	0.987236	0.0340733	0.705139	39	17
O95139	NDUFB6	NADH dehydrogenase [ubiquinone] 1 beta subcomplex subunit 6	0.987006	0.0403998	0.685557	25	47
Q9C0H2	TTYH3	Protein tweety homolog 3	0.986665	0.133735	0.777817	5	89
Q01459	CTBS	Di-N-acetylchitobiase	0.986587	0.071468	0.655145	7	85
Q5T2E6	ARMH3	Armadillo-like helical domain-containing protein 3	0.986487	0.0428837	0.760663	43	9
Q96A33	CCDC47	Coiled-coil domain-containing protein 47	0.986486	0.0425816	0.748173	39	17
P61619	SEC61A1	Protein transport protein Sec61 subunit alpha isoform 1	0.986476	0.0331336	0.706444	47	0
O60610	DIAPH1	Protein diaphanous homolog 1	0.986428	0.0261923	0.63462	47	0
Q9H993	ARMT1	Damage-control phosphatase ARMT1	0.986411	0.0413639	0.758973	46	2
Q9NU22	MDN1	Midasin	0.986352	0.108558	0.691417	4	91
A0FGR8	ESYT2	Extended synaptotagmin-2	0.986134	0.0321601	0.691254	47	0
Q9ULA0	DNPEP	Aspartyl aminopeptidase	0.985943	0.0282658	0.646859	47	0
Q7Z7H5	TMED4	Transmembrane emp24 domain-containing protein 4	0.985747	0.0297778	0.629108	39	17
Q14409	GK3P	Glycerol kinase 3	0.985518	0.0672932	0.705139	13	72
Q9H1V8	SLC6A17	Sodium-dependent neutral amino acid transporter SLC6A17	0.985466	0.0796984	0.638197	6	87
P40763	STAT3	Signal transducer and activator of transcription 3	0.985285	0.0339331	0.688903	47	0
Q9Y3E7	CHMP3	Charged multivesicular body protein 3	0.985055	0.125879	0.663959	3	94
Q9Y6N5	SQOR	Sulfide:quinone oxidoreductase, mitochondrial	0.984905	0.0464823	0.753702	43	9
Q15813	TBCE	Tubulin-specific chaperone E	0.984861	0.0453859	0.757336	47	0
Q9HDC9	APMAP	Adipocyte plasma membrane-associated protein	0.984795	0.0270134	0.60528	47	0
P14406	COX7A2	Cytochrome c oxidase subunit 7A2, mitochondrial	0.984714	0.0408757	0.717118	43	9
Q5JU69	TOR2A	Torsin-2A	0.984253	0.073571	0.546595	5	89
P61513	RPL37A	60S ribosomal protein L37a	0.98396	0.133282	0.659075	3	94
O75822	EIF3J	Eukaryotic translation initiation factor 3 subunit J	0.983931	0.058264	0.756848	32	32
P61006	RAB8A	Ras-related protein Rab-8A	0.983801	0.0421759	0.626571	25	47
P68402	PAFAH1B2	Platelet-activating factor acetylhydrolase IB subunit beta	0.983687	0.0415537	0.71574	47	0
P01111	NRAS	GTPase NRas	0.983638	0.0212956	0.480386	47	0
Q93034	CUL5	Cullin-5	0.983624	0.0192068	0.435963	47	0
Q9P2X3	IMPACT	Protein IMPACT	0.983517	0.0369878	0.594524	28	40
Q8WTV0	SCARB1	Scavenger receptor class B member 1	0.983442	0.0753571	0.488023	4	91
Q9Y295	DRG1	Developmentally-regulated GTP-binding protein 1	0.98331	0.0500136	0.75686	47	0
Q9NV88	INTS9	Integrator complex subunit 9	0.98292	0.0895968	0.546526	4	91
Q16795	NDUFA9	NADH dehydrogenase [ubiquinone] 1 alpha subcomplex subunit 9, mitochondrial	0.982909	0.0408346	0.697289	47	0
Q5T4S7	UBR4	E3 ubiquitin-protein ligase UBR4	0.982813	0.0144461	0.286455	47	0
Q13043	STK4	Serine/threonine-protein kinase 4	0.982753	0.038347	0.583265	27	43
Q8WUY1	THEM6	Protein THEM6	0.982553	0.0426483	0.703916	47	0
O94915	FRYL	Protein furry homolog-like	0.982542	0.0365784	0.646859	44	6
Q9H3K6	BOLA2	BolA-like protein 2	0.982493	0.0520941	0.605443	17	64
P35580	MYH10	Myosin-10	0.982429	0.0411537	0.691558	47	0
P22061	PCMT1	Protein-L-isoaspartate(D-aspartate) O-methyltransferase	0.982099	0.033029	0.604443	44	6
O95352	ATG7	Ubiquitin-like modifier-activating enzyme ATG7	0.981634	0.0375834	0.649302	47	0
Q5XPI4	RNF123	E3 ubiquitin-protein ligase RNF123	0.981567	0.0703568	0.676729	16	66
Q9HAB8	PPCS	Phosphopantothenate--cysteine ligase	0.981231	0.0480419	0.52127	15	68
Q9Y2W1	THRAP3	Thyroid hormone receptor-associated protein 3	0.981162	0.0468114	0.695011	43	9
Q8IZ83	ALDH16A1	Aldehyde dehydrogenase family 16 member A1	0.981153	0.0343628	0.610972	47	0
O43760	SYNGR2	Synaptogyrin-2	0.981143	0.0477955	0.530105	16	66
O60341	KDM1A	Lysine-specific histone demethylase 1A	0.981022	0.0498791	0.646322	28	40
Q96BW5	PTER	Phosphotriesterase-related protein	0.98093	0.0275437	0.520537	47	0
Q9HBG4	ATP6V0A4	V-type proton ATPase 116 kDa subunit a isoform 4	0.980574	0.0792261	0.637054	11	77
O60749	SNX2	Sorting nexin-2	0.980439	0.0419528	0.663812	47	0
Q99873	PRMT1	Protein arginine N-methyltransferase 1	0.980373	0.0366586	0.619112	47	0
Q7L5Y1	ENOSF1	Mitochondrial enolase superfamily member 1	0.980224	0.0597062	0.609022	17	64
Q9P253	VPS18	Vacuolar protein sorting-associated protein 18 homolog	0.97999	0.0321985	0.563259	47	0
Q6P179	ERAP2	Endoplasmic reticulum aminopeptidase 2	0.979895	0.0702408	0.714493	25	47
Q9NZK5	ADA2	Adenosine deaminase 2	0.979837	0.0675088	0.610972	14	70
Q96AY3	FKBP10	Peptidyl-prolyl cis-trans isomerase FKBP10	0.979687	0.0497083	0.703284	47	0
P61927	RPL37	60S ribosomal protein L37	0.97961	0.13995	0.591659	3	94
Q96DH6	MSI2	RNA-binding protein Musashi homolog 2	0.97941	0.028702	0.503336	47	0
Q16822	PCK2	Phosphoenolpyruvate carboxykinase [GTP], mitochondrial	0.979277	0.0475041	0.65905	40	15
P60468	SEC61B	Protein transport protein Sec61 subunit beta	0.979059	0.0869133	0.441733	4	91
Q9NXH8	TOR4A	Torsin-4A	0.978845	0.0975146	0.487347	4	91
O14521	SDHD	Succinate dehydrogenase [ubiquinone] cytochrome b small subunit, mitochondrial	0.978833	0.113735	0.491341	3	94
P18085	ARF4	ADP-ribosylation factor 4	0.978308	0.0391554	0.605651	47	0
Q8TD55	PLEKHO2	Pleckstrin homology domain-containing family O member 2	0.978177	0.058308	0.572734	18	62
P46379	BAG6	Large proline-rich protein BAG6	0.978121	0.0378487	0.577037	44	6
P63096	GNAI1	Guanine nucleotide-binding protein G(i) subunit alpha-1	0.977615	0.0692504	0.658805	22	53
Q15637	SF1	Splicing factor 1	0.977596	0.0255936	0.413489	47	0
O75607	NPM3	Nucleoplasmin-3	0.976778	0.0799179	0.352203	4	91
Q9Y4G6	TLN2	Talin-2	0.976167	0.048225	0.643408	47	0
O96008	TOMM40	Mitochondrial import receptor subunit TOM40 homolog	0.975442	0.0384038	0.548728	47	0
Q8N6T3	ARFGAP1	ADP-ribosylation factor GTPase-activating protein 1	0.975192	0.0744846	0.580706	15	68
Q3LXA3	TKFC	Triokinase/FMN cyclase	0.975171	0.0279872	0.404926	47	0
Q9UJX2	CDC23	Cell division cycle protein 23 homolog	0.975084	0.0301416	0.331929	30	36
Q8IYS1	PM20D2	Peptidase M20 domain-containing protein 2	0.97507	0.0838016	0.497396	8	83
Q9Y4B6	DCAF1	DDB1- and CUL4-associated factor 1	0.974916	0.058755	0.300264	7	85
P16278	GLB1	Beta-galactosidase	0.974815	0.0406449	0.543398	43	9
Q9UGP8	SEC63	Translocation protein SEC63 homolog	0.974731	0.0362301	0.511965	47	0
Q96SB8	SMC6	Structural maintenance of chromosomes protein 6	0.974468	0.106983	0.374364	3	94
O43861	ATP9B	Probable phospholipid-transporting ATPase IIB	0.97435	0.0330332	0.390613	34	28
Q9UJZ1	STOML2	Stomatin-like protein 2, mitochondrial	0.974338	0.0257984	0.349711	47	0
Q9UJ70	NAGK	N-acetyl-D-glucosamine kinase	0.974183	0.0377168	0.520044	47	0
Q92570	NR4A3	Nuclear receptor subfamily 4 group A member 3	0.973281	0.0898275	0.336802	4	91
P24821	TNC	Tenascin	0.973228	0.087905	0.695011	25	47
P29218	IMPA1	Inositol monophosphatase 1	0.972913	0.0336468	0.447092	47	0
Q13435	SF3B2	Splicing factor 3B subunit 2	0.972244	0.0491016	0.55966	39	17
Q12873	CHD3	Chromodomain-helicase-DNA-binding protein 3	0.971889	0.0955487	0.272675	3	94
Q96P70	IPO9	Importin-9	0.971722	0.0289366	0.355432	47	0
Q99720	SIGMAR1	Sigma non-opioid intracellular receptor 1	0.97157	0.0297505	0.302341	36	23
P13473	LAMP2	Lysosome-associated membrane glycoprotein 2	0.971438	0.0667288	0.687977	47	0
Q9P2D1	CHD7	Chromodomain-helicase-DNA-binding protein 7	0.971413	0.288908	0.522161	1	98
Q8TB61	SLC35B2	Adenosine 3~-phospho 5~-phosphosulfate transporter 1	0.971274	0.076157	0.224721	4	91
Q9C0C9	UBE2O	(E3-independent) E2 ubiquitin-conjugating enzyme	0.970778	0.0709786	0.551927	20	57
O75891	ALDH1L1	Cytosolic 10-formyltetrahydrofolate dehydrogenase	0.970768	0.0699939	0.67812	42	11
Q9NR30	DDX21	Nucleolar RNA helicase 2	0.970661	0.0601984	0.61526	39	17
Q9NRF8	CTPS2	CTP synthase 2	0.970562	0.0293658	0.297694	39	17
Q99497	PARK7	Parkinson disease protein 7	0.969724	0.0355074	0.418891	47	0
P05166	PCCB	Propionyl-CoA carboxylase beta chain, mitochondrial	0.969661	0.0372485	0.440223	47	0
O95278	EPM2A	Laforin	0.969385	0.0634696	0.384181	13	72
Q9NY93	DDX56	Probable ATP-dependent RNA helicase DDX56	0.969021	0.0670706	0.139448	4	91
Q96K76	USP47	Ubiquitin carboxyl-terminal hydrolase 47	0.968906	0.0298054	0.321833	47	0
P35606	COPB2	Coatomer subunit beta~	0.96874	0.0191079	0.127734	47	0
P49450	CENPA	Histone H3-like centromeric protein A	0.968565	0.0894559	0.190059	3	94
P61289	PSME3	Proteasome activator complex subunit 3	0.968503	0.0367691	0.415894	47	0
Q9NVA2	SEPTIN11	Septin-11	0.968345	0.0394339	0.419833	42	11
Q96P11	NSUN5	28S rRNA (cytosine-C(5))-methyltransferase	0.968133	0.0515504	0.462545	30	36
P61960	UFM1	Ubiquitin-fold modifier 1	0.967948	0.0417596	0.423136	39	17
O14735	CDIPT	CDP-diacylglycerol--inositol 3-phosphatidyltransferase	0.967945	0.0362652	0.373962	42	11
Q9UDY2	TJP2	Tight junction protein ZO-2	0.96756	0.039266	0.406121	42	11
P68400	CSNK2A1	Casein kinase II subunit alpha	0.9673	0.0402595	0.370354	35	26
A0A0B4J2D5	GATD3B	Glutamine amidotransferase-like class 1 domain-containing protein 3B, mitochondrial	0.967047	0.0374977	0.403564	47	0
Q9NWB7	IFT57	Intraflagellar transport protein 57 homolog	0.966847	0.127342	0.230974	2	96
P35221	CTNNA1	Catenin alpha-1	0.966804	0.0374216	0.398877	47	0
Q96ST3	SIN3A	Paired amphipathic helix protein Sin3a	0.966547	0.0364333	0.161656	18	62
Q9UNL2	SSR3	Translocon-associated protein subunit gamma	0.96646	0.0858934	0.145631	3	94
P62316	SNRPD2	Small nuclear ribonucleoprotein Sm D2	0.966151	0.0212891	0.135042	47	0
P23368	ME2	NAD-dependent malic enzyme, mitochondrial	0.966042	0.030846	0.293878	47	0
Q8IVF2	AHNAK2	Protein AHNAK2	0.965716	0.0867034	0.669737	36	23
O00244	ATOX1	Copper transport protein ATOX1	0.965626	0.0605351	0.532412	35	26
P55060	CSE1L	Exportin-2	0.9654	0.0300717	0.272533	47	0
P78347	GTF2I	General transcription factor II-I	0.96515	0.0263951	0.190059	43	9
Q3B8N2	LGALS9B	Galectin-9B	0.965049	0.0817752	0.112909	3	94
Q5TGY1	TMCO4	Transmembrane and coiled-coil domain-containing protein 4	0.964771	0.0829853	0.11483	3	94
P31689	DNAJA1	DnaJ homolog subfamily A member 1	0.964576	0.0376713	0.369222	47	0
O75746	SLC25A12	Calcium-binding mitochondrial carrier protein Aralar1	0.964503	0.0270283	0.211116	47	0
O43795	MYO1B	Unconventional myosin-Ib	0.96408	0.0340238	0.312694	47	0
O94874	UFL1	E3 UFM1-protein ligase 1	0.963873	0.0239074	0.151994	47	0
Q8WXH0	SYNE2	Nesprin-2	0.963872	0.0325865	0.28923	47	0
P14649	MYL6B	Myosin light chain 6B	0.963792	0.0839262	0.108938	3	94
P42285	MTREX	Exosome RNA helicase MTR4	0.963663	0.0333527	0.253012	39	17
P08134	RHOC	Rho-related GTP-binding protein RhoC	0.963581	0.0389759	0.238853	27	43
Q9UGM6	WARS2	Tryptophan--tRNA ligase, mitochondrial	0.963575	0.080598	0.0937617	3	94
Q96GK7	FAHD2A	Fumarylacetoacetate hydrolase domain-containing protein 2A	0.963515	0.101224	0.237811	4	91
Q02880	TOP2B	DNA topoisomerase 2-beta	0.963399	0.0321923	0.276855	47	0
O00429	DNM1L	Dynamin-1-like protein	0.963373	0.0286574	0.222671	47	0
Q96CN7	ISOC1	Isochorismatase domain-containing protein 1	0.963324	0.033895	0.300264	47	0
Q9NTJ5	SACM1L	Phosphatidylinositol-3-phosphatase SAC1	0.963188	0.0220891	0.116222	47	0
P07902	GALT	Galactose-1-phosphate uridylyltransferase	0.963085	0.0361152	0.198221	27	43
P17980	PSMC3	26S proteasome regulatory subunit 6A	0.962813	0.024785	0.15399	47	0
Q5TFE4	NT5DC1	5~-nucleotidase domain-containing protein 1	0.962761	0.0391795	0.254871	30	36
Q13905	RAPGEF1	Rap guanine nucleotide exchange factor 1	0.962505	0.0512369	0.346082	26	45
Q9HA64	FN3KRP	Ketosamine-3-kinase	0.961788	0.0384162	0.31858	43	9
P33121	ACSL1	Long-chain-fatty-acid--CoA ligase 1	0.961707	0.0522759	0.484249	47	0
Q6P996	PDXDC1	Pyridoxal-dependent decarboxylase domain-containing protein 1	0.961573	0.0415961	0.290356	33	30
Q8IZ52	CHPF	Chondroitin sulfate synthase 2	0.961186	0.0727134	0.0497674	3	94
Q9Y678	COPG1	Coatomer subunit gamma-1	0.961101	0.0220434	0.0960527	47	0
O95848	NUDT14	Uridine diphosphate glucose pyrophosphatase NUDT14	0.961094	0.0850479	0.0882124	3	94
O43615	TIMM44	Mitochondrial import inner membrane translocase subunit TIM44	0.961021	0.029725	0.209307	47	0
Q53FA7	TP53I3	Quinone oxidoreductase PIG3	0.960975	0.0597204	0.0385726	4	91
Q96SU4	OSBPL9	Oxysterol-binding protein-related protein 9	0.960935	0.0245531	0.103389	40	15
Q9HCE6	ARHGEF10L	Rho guanine nucleotide exchange factor 10-like protein	0.960754	0.073991	0.0508223	3	94
P33176	KIF5B	Kinesin-1 heavy chain	0.960675	0.0194116	0.0585669	47	0
Q96K17	BTF3L4	Transcription factor BTF3 homolog 4	0.96011	0.0575118	0.0288476	4	91
Q5JPE7	NOMO2	Nodal modulator 2	0.960061	0.0391083	0.281469	39	17
Q96EH3	MALSU1	Mitochondrial assembly of ribosomal large subunit protein 1	0.959926	0.0583929	0.0302639	4	91
P06280	GLA	Alpha-galactosidase A	0.959851	0.0672876	0.482378	31	34
Q03001	DST	Dystonin	0.959609	0.0559066	0.0234824	4	91
Q9NR09	BIRC6	Baculoviral IAP repeat-containing protein 6	0.959221	0.0464851	0.16293	17	64
Q969X1	TMBIM1	Protein lifeguard 3	0.958279	0.0624037	0.450831	34	28
Q8N684	CPSF7	Cleavage and polyadenylation specificity factor subunit 7	0.958273	0.0633765	0.464763	35	26
Q5JVS0	HABP4	Intracellular hyaluronan-binding protein 4	0.95809	0.0559706	0.0189674	4	91
P61158	ACTR3	Actin-related protein 3	0.957893	0.0265903	0.130415	47	0
Q8N1S5	SLC39A11	Zinc transporter ZIP11	0.957838	0.0486834	0.00802611	4	91
Q9Y5X3	SNX5	Sorting nexin-5	0.957611	0.0213011	0.0609386	47	0
Q5VWZ2	LYPLAL1	Lysophospholipase-like protein 1	0.957564	0.0290529	0.14366	43	9
P30622	CLIP1	CAP-Gly domain-containing linker protein 1	0.957564	0.0349394	0.13901	29	38
O00217	NDUFS8	NADH dehydrogenase [ubiquinone] iron-sulfur protein 8, mitochondrial	0.957459	0.0536982	0.447092	47	0
O95674	CDS2	Phosphatidate cytidylyltransferase 2	0.957434	0.0421265	0.279054	38	19
Q12888	TP53BP1	TP53-binding protein 1	0.957433	0.0443312	0.196173	24	49
P49589	CARS1	Cysteine--tRNA ligase, cytoplasmic	0.957361	0.0344234	0.233139	47	0
A6NDU8	C5orf51	UPF0600 protein C5orf51	0.957243	0.0498907	0.00844302	4	91
P55265	ADAR	Double-stranded RNA-specific adenosine deaminase	0.956767	0.0349147	0.233035	47	0
P14625	HSP90B1	Endoplasmin	0.956703	0.0212928	0.0555853	47	0
Q9H2G2	SLK	STE20-like serine/threonine-protein kinase	0.956428	0.0348763	0.228748	47	0
Q969Z3	MTARC2	Mitochondrial amidoxime reducing component 2	0.956397	0.0980127	0.0938988	3	94
P61009	SPCS3	Signal peptidase complex subunit 3	0.956093	0.0381588	0.246026	43	9
Q13620	CUL4B	Cullin-4B	0.956024	0.032468	0.192232	47	0
Q96GM8	TOE1	Target of EGR1 protein 1	0.955877	0.108138	0.122339	3	94
P49753	ACOT2	Acyl-coenzyme A thioesterase 2, mitochondrial	0.955641	0.0873709	0.0227545	2	96
Q9UHY1	NRBP1	Nuclear receptor-binding protein	0.9553	0.0370212	0.201072	39	17
Q3T906	GNPTAB	N-acetylglucosamine-1-phosphotransferase subunits alpha/beta	0.954903	0.0551776	0.010791	4	91
O75964	ATP5MG	ATP synthase subunit g, mitochondrial	0.954857	0.0285479	0.129317	47	0
Q9UQE7	SMC3	Structural maintenance of chromosomes protein 3	0.954604	0.0275085	0.114359	47	0
Q08378	GOLGA3	Golgin subfamily A member 3	0.954586	0.0294504	0.12233	43	9
Q6R327	RICTOR	Rapamycin-insensitive companion of mTOR	0.954546	0.041729	0.00134717	4	91
Q13158	FADD	FAS-associated death domain protein	0.954534	0.0515839	0.00657365	4	91
Q9BYD6	MRPL1	39S ribosomal protein L1, mitochondrial	0.954347	0.0417228	0.193557	31	34
P27824	CANX	Calnexin	0.954302	0.02826	0.121139	47	0
Q8WUY3	PRUNE2	Protein prune homolog 2	0.954062	0.0435348	0.163337	25	47
Q9C0I1	MTMR12	Myotubularin-related protein 12	0.953933	0.0531811	0.14018	15	68
Q96TA1	NIBAN2	Protein Niban 2	0.953649	0.0368181	0.224	47	0
Q9BYG3	NIFK	MKI67 FHA domain-interacting nucleolar phosphoprotein	0.95363	0.0487506	0.00378075	4	91
Q9H270	VPS11	Vacuolar protein sorting-associated protein 11 homolog	0.953577	0.0492293	0.237584	28	40
O60443	GSDME	Gasdermin-E	0.953403	0.0547988	0.340951	35	26
Q32P44	EML3	Echinoderm microtubule-associated protein-like 3	0.953307	0.100721	0.494795	20	57
O00566	MPHOSPH10	U3 small nucleolar ribonucleoprotein protein MPP10	0.953054	0.0398796	0.000640611	4	91
Q8N2H3	PYROXD2	Pyridine nucleotide-disulfide oxidoreductase domain-containing protein 2	0.953003	0.0648069	0.0089139	3	94
O75955	FLOT1	Flotillin-1	0.952876	0.0280999	0.108347	47	0
Q8TBX8	PIP4K2C	Phosphatidylinositol 5-phosphate 4-kinase type-2 gamma	0.952767	0.0267082	0.0679431	40	15
Q9Y2U8	LEMD3	Inner nuclear membrane protein Man1	0.952578	0.0517137	0.00157389	3	94
O00339	MATN2	Matrilin-2	0.952473	0.0622144	0.0154333	4	91
P16104	H2AX	Histone H2AX	0.952308	0.0514818	0.00142899	3	94
P53602	MVD	Diphosphomevalonate decarboxylase	0.952175	0.061312	0.0136176	4	91
Q9NP77	SSU72	RNA polymerase II subunit A C-terminal domain phosphatase SSU72	0.952046	0.0515684	0.00137132	3	94
Q92608	DOCK2	Dedicator of cytokinesis protein 2	0.951999	0.087241	0.329408	14	70
Q5T447	HECTD3	E3 ubiquitin-protein ligase HECTD3	0.95186	0.0272064	0.0770931	43	9
Q7Z4V5	HDGFL2	Hepatoma-derived growth factor-related protein 2	0.951652	0.054035	0.0770899	11	77
P48449	LSS	Lanosterol synthase	0.951557	0.041427	0.189985	35	26
Q96KR6	FAM210B	Protein FAM210B, mitochondrial	0.951525	0.0499241	0.000922746	3	94
Q9P107	GMIP	GEM-interacting protein	0.951107	0.0614599	0.00455393	3	94
Q9Y5Q8	GTF3C5	General transcription factor 3C polypeptide 5	0.951085	0.0494389	0.000766541	3	94
Q12846	STX4	Syntaxin-4	0.951054	0.0437011	0.000913788	4	91
Q96N66	MBOAT7	Lysophospholipid acyltransferase 7	0.950884	0.0268128	0.0794448	47	0
Q92879	CELF1	CUGBP Elav-like family member 1	0.950762	0.0440672	0.000922746	4	91
Q96DT6	ATG4C	Cysteine protease ATG4C	0.950518	0.0803182	0.0450257	4	91
P08575	PTPRC	Receptor-type tyrosine-protein phosphatase C	0.950502	0.0695898	0.445967	38	19
P0DMP2	SRGAP2B	SLIT-ROBO Rho GTPase-activating protein 2B	0.950427	0.0674441	0.0187412	4	91
Q96FZ7	CHMP6	Charged multivesicular body protein 6	0.950388	0.0383208	0.000225066	4	91
Q70UQ0	IKBIP	Inhibitor of nuclear factor kappa-B kinase-interacting protein	0.950317	0.0631142	0.0125713	4	91
O95831	AIFM1	Apoptosis-inducing factor 1, mitochondrial	0.950082	0.0241571	0.0493926	47	0
Q8N755	SLC66A3	Solute carrier family 66 member 3	0.95008	0.0950631	0.0176039	2	96
Q6L8Q7	PDE12	2~,5~-phosphodiesterase 12	0.949993	0.0407833	0.150582	32	32
P36543	ATP6V1E1	V-type proton ATPase subunit E 1	0.949692	0.0329514	0.139959	47	0
Q9NZ01	TECR	Very-long-chain enoyl-CoA reductase	0.949534	0.0309152	0.115801	47	0
O75718	CRTAP	Cartilage-associated protein	0.949534	0.0465706	0.000303099	3	94
[truncated: 1,940 more rows]
