# Supplementary material for: Proteomics of Primary Uveal Melanoma: Insights into Metastasis and Protein Biomarkers
Source: Cancers (Basel). 2021 Jul 14;13(14):3520. doi: 10.3390/cancers13143520 (PMC8307952; doi:10.3390/cancers13143520)
Supplement: Supplementary file 1 [file cancers-13-03520-s001.zip › Table S6. Differentially Expressed Proteins.xlsx]

## Sheet: TableS6-n402-Metsn53vsNoMetsn47
Supplementary Table S6. pUM Differentially Expressed Proteins, n=402 Yellow, ≥ 1SD from the mean; Orange, ≥ 2SD from the mean Sorted by Decreasing Protein Ratio
UniProt Accession	Gene Name	Protein	Protein Ratio Met pUM/NoMet pUM	Adjusted p-value	Metastasizing pUM Total Count = 53	Non-Metastasizing pUM Total Count = 47	% Imputation	Predicted Cell Surface Localization
Proteins More Abundant in Metastasizing pUM (n=191)
P23381	WARS1	Tryptophan--tRNA ligase, cytoplasmic	1.90603	4.64065e-06	53	47	0
P04439	HLA-A	HLA class I histocompatibility antigen, A alpha chain	1.81806	1.60705e-06	53	47	0	X
P61769	B2M	Beta-2-microglobulin	1.76827	2.65926e-05	47	39	14	X
P01903	HLA-DRA	HLA class II histocompatibility antigen, DR alpha chain	1.72735	9.17413e-05	53	47	0	X
Q03518	TAP1	Antigen peptide transporter 1	1.63028	3.23926e-05	53	47	0
P10321	HLA-C	HLA class I histocompatibility antigen, C alpha chain	1.62419	1.79022e-05	52	46	2	X
Q8IVF2	AHNAK2	Protein AHNAK2	1.61603	0.000878694	44	36	20	X
O95816	BAG2	BAG family molecular chaperone regulator 2	1.59469	2.26005e-07	42	39	19
P07686	HEXB	Beta-hexosaminidase subunit beta	1.58918	0.000190552	53	47	0
P33121	ACSL1	Long-chain-fatty-acid--CoA ligase 1	1.56234	1.43809e-05	53	47	0	X
P17931	LGALS3	Galectin-3	1.54879	4.56333e-05	52	47	1	X
P19971	TYMP	Thymidine phosphorylase	1.5336	0.000939141	53	47	0
P51810	GPR143	G-protein coupled receptor 143	1.52995	0.000463157	53	47	0	X
Q06210	GFPT1	Glutamine--fructose-6-phosphate aminotransferase [isomerizing] 1	1.50515	3.77753e-05	53	47	0
Q9H3G5	CPVL	Probable serine carboxypeptidase CPVL	1.48597	0.000742949	53	47	0
O00584	RNASET2	Ribonuclease T2	1.46806	0.00508992	50	43	7
Q8TCT9	HM13	Minor histocompatibility antigen H13	1.45958	4.85587e-06	53	47	0	X
P42224	STAT1	Signal transducer and activator of transcription 1-alpha/beta	1.43803	0.00167213	53	47	0
P43007	SLC1A4	Neutral amino acid transporter A	1.43572	0.000312674	44	36	20	X
P31146	CORO1A	Coronin-1A	1.42723	0.0035484	53	47	0	X
Q86UX7	FERMT3	Fermitin family homolog 3	1.41893	2.24807e-05	53	47	0
P28838	LAP3	Cytosol aminopeptidase	1.4185	0.000358439	53	47	0
Q96AY3	FKBP10	Peptidyl-prolyl cis-trans isomerase FKBP10	1.4179	0.000136849	53	47	0
P04062	GBA	Lysosomal acid glucosylceramidase	1.41224	5.92913e-06	53	47	0
P06865	HEXA	Beta-hexosaminidase subunit alpha	1.41118	0.00205352	53	47	0
P09936	UCHL1	Ubiquitin carboxyl-terminal hydrolase isozyme L1	1.40817	0.00820144	50	43	7	X
P08236	GUSB	Beta-glucuronidase	1.4021	0.000637735	53	47	0
P39060	COL18A1	Collagen alpha-1(XVIII) chain	1.4016	0.00015136	53	47	0
P24557	TBXAS1	Thromboxane-A synthase	1.40105	0.000499669	47	41	12	X
P50225	SULT1A1	Sulfotransferase 1A1	1.40009	0.00963576	47	39	14
P05107	ITGB2	Integrin beta-2	1.39577	0.010147	43	37	20	X
P13473	LAMP2	Lysosome-associated membrane glycoprotein 2	1.39084	0.00251974	53	47	0	X
Q99584	S100A13	Protein S100-A13	1.37636	0.00315407	53	47	0	X
P13796	LCP1	Plastin-2	1.3714	0.0180897	53	47	0	X
Q96DB5	RMDN1	Regulator of microtubule dynamics protein 1	1.36584	0.000694973	53	47	0
Q7LG56	RRM2B	Ribonucleoside-diphosphate reductase subunit M2 B	1.36357	0.000694973	53	47	0
Q8NHP8	PLBD2	Putative phospholipase B-like 2	1.3593	0.0133867	46	38	16
Q8TDZ2	MICAL1	[F-actin]-monooxygenase MICAL1	1.35852	0.00463388	53	47	0	X
Q01469	FABP5	Fatty acid-binding protein 5	1.35467	0.00370502	50	43	7	X
Q01813	PFKP	ATP-dependent 6-phosphofructokinase, platelet type	1.34814	0.00042368	53	47	0
P15559	NQO1	NAD(P)H dehydrogenase [quinone] 1	1.3473	0.0145021	53	47	0
Q6IAN0	DHRS7B	Dehydrogenase/reductase SDR family member 7B	1.34528	0.000243392	53	47	0
O00148	DDX39A	ATP-dependent RNA helicase DDX39A	1.33958	0.000736742	53	47	0
P15586	GNS	N-acetylglucosamine-6-sulfatase	1.33943	0.000190552	53	47	0
P07093	SERPINE2	Glia-derived nexin	1.33915	0.0239012	53	47	0
P28062	PSMB8	Proteasome subunit beta type-8	1.33561	0.0189256	53	47	0
Q9Y6N5	SQOR	Sulfide:quinone oxidoreductase, mitochondrial	1.33492	0.000753135	50	43	7
Q14112	NID2	Nidogen-2	1.33254	0.0131109	53	47	0	X
Q16666	IFI16	Gamma-interferon-inducible protein 16	1.33168	0.0441802	53	47	0
O75352	MPDU1	Mannose-P-dolichol utilization defect 1 protein	1.33149	0.000156838	53	47	0
Q9NUV9	GIMAP4	GTPase IMAP family member 4	1.33117	0.0135073	53	47	0
P06703	S100A6	Protein S100-A6	1.33028	0.0395357	53	47	0	X
P67936	TPM4	Tropomyosin alpha-4 chain	1.32982	0.000374871	53	47	0
P09382	LGALS1	Galectin-1	1.32233	0.00463388	53	47	0
P61019	RAB2A	Ras-related protein Rab-2A	1.31993	1.72201e-05	53	47	0
P51606	RENBP	N-acylglucosamine 2-epimerase	1.31342	0.000878694	53	47	0
P30533	LRPAP1	Alpha-2-macroglobulin receptor-associated protein	1.3058	0.000736742	53	47	0	X
O00560	SDCBP	Syntenin-1	1.30261	0.00864856	53	47	0	X
P53634	CTSC	Dipeptidyl peptidase 1	1.30147	0.00629038	53	47	0
Q8WUY1	THEM6	Protein THEM6	1.29746	0.000463157	53	47	0
Q08380	LGALS3BP	Galectin-3-binding protein	1.29707	0.000463157	53	47	0	X
Q9NUQ9	CYRIB	CYFIP-related Rac1 interactor B	1.29648	0.000411124	53	47	0
Q14764	MVP	Major vault protein	1.29179	0.00033983	53	47	0
P16435	POR	NADPH--cytochrome P450 reductase	1.28968	0.000182212	53	47	0
P48735	IDH2	Isocitrate dehydrogenase [NADP], mitochondrial	1.28728	0.000442965	53	47	0
P07099	EPHX1	Epoxide hydrolase 1	1.28671	0.0158375	53	47	0
Q86WV6	STING1	Stimulator of interferon genes protein	1.28324	0.000518201	47	38	15	X
P07858	CTSB	Cathepsin B	1.2818	0.0206894	53	47	0	X
Q8IV08	PLD3	5~-3~ exonuclease PLD3	1.28063	0.0317694	53	47	0
Q14019	COTL1	Coactosin-like protein	1.279	0.0212017	53	47	0	X
P21964	COMT	Catechol O-methyltransferase	1.27497	0.0117686	53	47	0	X
P17900	GM2A	Ganglioside GM2 activator	1.27462	0.0156817	53	47	0
Q9UL46	PSME2	Proteasome activator complex subunit 2	1.2735	0.0131862	53	47	0
Q99523	SORT1	Sortilin	1.27102	0.00150397	53	47	0	X
P16615	ATP2A2	Sarcoplasmic/endoplasmic reticulum calcium ATPase 2	1.2703	6.79821e-07	53	47	0	X
Q3SY69	ALDH1L2	Mitochondrial 10-formyltetrahydrofolate dehydrogenase	1.26995	0.0399398	53	47	0
O00764	PDXK	Pyridoxal kinase	1.26961	0.00105943	53	47	0
P12111	COL6A3	Collagen alpha-3(VI) chain	1.2695	0.0206989	53	47	0
P04179	SOD2	Superoxide dismutase [Mn], mitochondrial	1.26617	0.0268597	53	47	0
Q92542	NCSTN	Nicastrin	1.26276	0.000673264	53	47	0	X
Q8NBN3	TMEM87A	Transmembrane protein 87A	1.259	0.00126357	49	44	7
P37802	TAGLN2	Transgelin-2	1.25339	0.00116966	53	47	0
Q8NDH3	NPEPL1	Probable aminopeptidase NPEPL1	1.25276	0.00172413	53	47	0
Q9BWM7	SFXN3	Sideroflexin-3	1.25097	0.00856012	53	47	0
Q14160	SCRIB	Protein scribble homolog	1.24967	0.00985214	53	47	0	X
Q9BVK6	TMED9	Transmembrane emp24 domain-containing protein 9	1.24842	4.83317e-06	53	47	0
Q15363	TMED2	Transmembrane emp24 domain-containing protein 2	1.24709	0.0171497	53	47	0
Q9NZM1	MYOF	Myoferlin	1.24599	0.0370831	53	47	0	X
Q13488	TCIRG1	V-type proton ATPase 116 kDa subunit a3	1.24561	0.0117712	53	47	0	X
O00160	MYO1F	Unconventional myosin-If	1.24403	0.0286147	44	36	20	X
P11117	ACP2	Lysosomal acid phosphatase	1.24378	0.00288971	52	46	2
Q13162	PRDX4	Peroxiredoxin-4	1.23773	0.00330339	49	44	7
Q9Y673	ALG5	Dolichyl-phosphate beta-glucosyltransferase	1.23404	0.0270494	48	44	8
Q92896	GLG1	Golgi apparatus protein 1	1.22934	0.00463388	53	47	0	X
Q9Y394	DHRS7	Dehydrogenase/reductase SDR family member 7	1.22922	0.00379674	53	47	0
Q13011	ECH1	Delta(3,5)-Delta(2,4)-dienoyl-CoA isomerase, mitochondrial	1.22838	0.00149584	53	47	0
O94919	ENDOD1	Endonuclease domain-containing 1 protein	1.22693	0.00379674	53	47	0
P21796	VDAC1	Voltage-dependent anion-selective channel protein 1	1.22539	8.30851e-05	53	47	0	X
A1L0T0	ILVBL	2-hydroxyacyl-CoA lyase 2	1.22394	0.000250138	53	47	0
P27105	STOM	Erythrocyte band 7 integral membrane protein	1.22183	0.0262084	53	47	0	X
Q7Z3E5	ARMC9	LisH domain-containing protein ARMC9	1.21999	0.0362436	47	39	14
P49755	TMED10	Transmembrane emp24 domain-containing protein 10	1.218	0.000726299	53	47	0	X
A0FGR8	ESYT2	Extended synaptotagmin-2	1.21646	0.000920158	53	47	0	X
Q9H8Y8	GORASP2	Golgi reassembly-stacking protein 2	1.21409	0.000499669	53	46	1
Q9BU23	LMF2	Lipase maturation factor 2	1.21393	0.00613177	53	47	0
P12236	SLC25A6	ADP/ATP translocase 3	1.21294	0.00370502	53	47	0
Q16698	DECR1	2,4-dienoyl-CoA reductase, mitochondrial	1.21124	0.019679	53	47	0
Q7Z7H5	TMED4	Transmembrane emp24 domain-containing protein 4	1.21095	0.000466192	46	39	15
P13674	P4HA1	Prolyl 4-hydroxylase subunit alpha-1	1.21071	0.0218911	53	47	0
Q9UGP8	SEC63	Translocation protein SEC63 homolog	1.2097	0.00365398	53	47	0
P10253	GAA	Lysosomal alpha-glucosidase	1.20962	0.0286272	53	47	0	X
P48960	ADGRE5	Adhesion G protein-coupled receptor E5	1.20925	0.00652046	53	47	0	X
Q9NZ08	ERAP1	Endoplasmic reticulum aminopeptidase 1	1.20669	0.0225943	53	47	0	X
Q9Y5X2	SNX8	Sorting nexin-8	1.20654	0.00403916	53	47	0
P46940	IQGAP1	Ras GTPase-activating-like protein IQGAP1	1.20597	0.00495878	53	47	0	X
Q53H82	LACTB2	Endoribonuclease LACTB2	1.20594	0.00513373	53	47	0
P11047	LAMC1	Laminin subunit gamma-1	1.20522	0.0410556	53	47	0
Q96PU5	NEDD4L	E3 ubiquitin-protein ligase NEDD4-like	1.20489	0.00619405	53	47	0	X
P57737	CORO7	Coronin-7	1.20429	0.0108401	47	39	14
P23368	ME2	NAD-dependent malic enzyme, mitochondrial	1.20132	0.000886873	53	47	0
O14773	TPP1	Tripeptidyl-peptidase 1	1.20068	0.0449054	53	47	0
P27824	CANX	Calnexin	1.20043	0.00187838	53	47	0
P01023	A2M	Alpha-2-macroglobulin	1.20038	0.0264175	53	47	0
O15260	SURF4	Surfeit locus protein 4	1.19981	0.00241409	53	47	0	X
Q9Y3Z3	SAMHD1	Deoxynucleoside triphosphate triphosphohydrolase SAMHD1	1.19828	0.0276817	53	47	0	X
O95202	LETM1	Mitochondrial proton/calcium exchanger protein	1.19728	0.0115071	53	47	0
P40616	ARL1	ADP-ribosylation factor-like protein 1	1.19556	8.38864e-05	53	47	0
Q9H0V1	TMEM168	Transmembrane protein 168	1.19222	0.00576308	42	40	18
O00468	AGRN	Agrin	1.19113	0.0384215	53	47	0	X
P55058	PLTP	Phospholipid transfer protein	1.1907	0.0374552	50	43	7
P60709	ACTB	Actin, cytoplasmic 1	1.1905	0.00555939	50	44	6	X
P10619	CTSA	Lysosomal protective protein	1.19032	0.016685	53	47	0
Q15056	EIF4H	Eukaryotic translation initiation factor 4H	1.19016	0.0218265	53	47	0
Q9Y3A6	TMED5	Transmembrane emp24 domain-containing protein 5	1.18917	0.0129717	50	43	7
Q8N5K1	CISD2	CDGSH iron-sulfur domain-containing protein 2	1.18807	0.0126135	50	43	7
P29218	IMPA1	Inositol monophosphatase 1	1.18702	0.00652046	53	47	0
P42858	HTT	Huntingtin	1.18313	0.00190748	53	47	0
Q86UE4	MTDH	Protein LYRIC	1.18278	0.0287051	53	47	0
P55268	LAMB2	Laminin subunit beta-2	1.18206	0.0486747	53	47	0
P22307	SCP2	Non-specific lipid-transfer protein	1.182	0.0144175	47	40	13
Q12797	ASPH	Aspartyl/asparaginyl beta-hydroxylase	1.1789	0.0035484	53	47	0	X
Q13315	ATM	Serine-protein kinase ATM	1.17604	0.0321279	47	40	13
P50570	DNM2	Dynamin-2	1.17474	0.000312674	53	47	0	X
Q99829	CPNE1	Copine-1	1.17399	0.0481841	53	47	0	X
P78527	PRKDC	DNA-dependent protein kinase catalytic subunit	1.17277	0.00126357	53	47	0
Q5SWX8	ODR4	Protein odr-4 homolog	1.17173	0.0127625	47	38	15
P48444	ARCN1	Coatomer subunit delta	1.17162	0.0004093	53	47	0
Q9BS26	ERP44	Endoplasmic reticulum resident protein 44	1.17161	0.00105214	53	47	0
P18031	PTPN1	Tyrosine-protein phosphatase non-receptor type 1	1.17014	0.00389312	50	43	7	X
O75165	DNAJC13	DnaJ homolog subfamily C member 13	1.16973	0.00873757	53	47	0	X
Q15149	PLEC	Plectin	1.16927	0.00479793	53	47	0	X
Q63HN8	RNF213	E3 ubiquitin-protein ligase RNF213	1.1682	0.0108401	53	47	0
Q00765	REEP5	Receptor expression-enhancing protein 5	1.16654	0.0352576	53	47	0
Q9H4A6	GOLPH3	Golgi phosphoprotein 3	1.16633	0.0428071	53	47	0	X
P30038	ALDH4A1	Delta-1-pyrroline-5-carboxylate dehydrogenase, mitochondrial	1.16512	0.0385143	53	47	0
Q12907	LMAN2	Vesicular integral-membrane protein VIP36	1.16478	0.00337508	53	47	0
P51659	HSD17B4	Peroxisomal multifunctional enzyme type 2	1.16335	0.0211374	53	47	0
P52306	RAP1GDS1	Rap1 GTPase-GDP dissociation stimulator 1	1.16211	0.0415831	53	47	0
Q9UH03	SEPTIN3	Neuronal-specific septin-3	1.16092	0.0241556	42	38	20
Q9HD67	MYO10	Unconventional myosin-X	1.16012	0.0473149	53	47	0	X
O43852	CALU	Calumenin	1.15978	0.0459815	53	47	0
P80303	NUCB2	Nucleobindin-2	1.1542	0.0369356	43	41	16	X
P49748	ACADVL	Very long-chain specific acyl-CoA dehydrogenase, mitochondrial	1.15402	0.0115071	53	47	0
Q96JJ7	TMX3	Protein disulfide-isomerase TMX3	1.15234	0.00455851	53	47	0	X
P23284	PPIB	Peptidyl-prolyl cis-trans isomerase B	1.15218	0.0256273	53	47	0
Q9UNK0	STX8	Syntaxin-8	1.14961	0.0334352	53	47	0	X
Q9Y3B3	TMED7	Transmembrane emp24 domain-containing protein 7	1.14784	0.0123905	48	44	8
P40763	STAT3	Signal transducer and activator of transcription 3	1.14718	0.0261632	53	47	0	X
O76021	RSL1D1	Ribosomal L1 domain-containing protein 1	1.14303	0.0365551	53	47	0
P48739	PITPNB	Phosphatidylinositol transfer protein beta isoform	1.14215	0.0129384	53	47	0
P53041	PPP5C	Serine/threonine-protein phosphatase 5	1.13951	0.0105596	53	47	0	X
P07237	P4HB	Protein disulfide-isomerase	1.13783	0.0427998	53	47	0	X
P61421	ATP6V0D1	V-type proton ATPase subunit d 1	1.13712	0.0376253	53	47	0
Q9ULV4	CORO1C	Coronin-1C	1.13642	0.0365551	53	47	0	X
P62820	RAB1A	Ras-related protein Rab-1A	1.13571	0.00500139	53	47	0
Q9BUQ8	DDX23	Probable ATP-dependent RNA helicase DDX23	1.13065	0.0157423	53	47	0
Q5T1M5	FKBP15	FK506-binding protein 15	1.12668	0.0306178	53	47	0	X
P53618	COPB1	Coatomer subunit beta	1.12606	9.17413e-05	53	47	0	X
Q9HD20	ATP13A1	Manganese-transporting ATPase 13A1	1.12546	0.0277075	53	47	0
P43304	GPD2	Glycerol-3-phosphate dehydrogenase, mitochondrial	1.1247	0.00807156	53	47	0
P27797	CALR	Calreticulin	1.1242	0.044665	53	47	0	X
P14625	HSP90B1	Endoplasmin	1.12398	0.00722683	53	47	0	X
P53396	ACLY	ATP-citrate synthase	1.123	0.0104942	53	47	0	X
P11021	HSPA5	Endoplasmic reticulum chaperone BiP	1.12235	0.00617583	53	47	0	X
Q00341	HDLBP	Vigilin	1.12164	0.00855672	53	47	0	X
P48729	CSNK1A1	Casein kinase I isoform alpha	1.12139	0.0114589	53	47	0
O75131	CPNE3	Copine-3	1.1199	0.0174451	53	47	0	X
Q7KZF4	SND1	Staphylococcal nuclease domain-containing protein 1	1.11624	0.00365227	53	47	0
P53621	COPA	Coatomer subunit alpha	1.11598	0.00167982	53	47	0
O60763	USO1	General vesicular transport factor p115	1.11224	0.00213679	53	47	0
Q02818	NUCB1	Nucleobindin-1	1.11115	0.0441381	53	47	0
Proteins More Abundant in Non-Metastasizing pUM (n=211)
P62333	PSMC6	26S proteasome regulatory subunit 10B	0.897762	0.00552529	53	47	0
P31937	HIBADH	3-hydroxyisobutyrate dehydrogenase, mitochondrial	0.897588	0.0133927	53	47	0
P43686	PSMC4	26S proteasome regulatory subunit 6B	0.896155	0.0100753	53	47	0
Q9BPX5	ARPC5L	Actin-related protein 2/3 complex subunit 5-like protein	0.895023	0.0284805	53	47	0
Q9UIA9	XPO7	Exportin-7	0.894721	0.0487827	53	47	0
P27694	RPA1	Replication protein A 70 kDa DNA-binding subunit	0.894656	0.0388312	53	47	0
Q9UNZ2	NSFL1C	NSFL1 cofactor p47	0.893639	0.0199834	53	47	0	X
Q13347	EIF3I	Eukaryotic translation initiation factor 3 subunit I	0.888537	0.0399196	53	47	0
P51812	RPS6KA3	Ribosomal protein S6 kinase alpha-3	0.887375	0.0486747	50	43	7
Q13724	MOGS	Mannosyl-oligosaccharide glucosidase	0.886697	0.0199834	53	47	0
P38606	ATP6V1A	V-type proton ATPase catalytic subunit A	0.884901	0.0114589	53	47	0	X
P01111	NRAS	GTPase NRas	0.884505	0.00399789	53	47	0	X
P53007	SLC25A1	Tricarboxylate transport protein, mitochondrial	0.883565	0.0103272	53	47	0
P52948	NUP98	Nuclear pore complex protein Nup98-Nup96	0.880958	0.0141027	50	43	7
Q9P2R7	SUCLA2	Succinate--CoA ligase [ADP-forming] subunit beta, mitochondrial	0.879896	0.0376253	53	47	0
Q96AE4	FUBP1	Far upstream element-binding protein 1	0.87986	0.039153	53	47	0
P00558	PGK1	Phosphoglycerate kinase 1	0.878952	0.0308721	53	47	0
Q93100	PHKB	Phosphorylase b kinase regulatory subunit beta	0.877394	0.0387305	45	42	13	X
Q9NZL9	MAT2B	Methionine adenosyltransferase 2 subunit beta	0.877196	0.00382767	50	43	7
Q14232	EIF2B1	Translation initiation factor eIF-2B subunit alpha	0.877095	0.0241851	49	44	7
P08754	GNAI3	Guanine nucleotide-binding protein G(i) subunit alpha	0.874644	0.0044943	40	42	18	X
Q9BR76	CORO1B	Coronin-1B	0.874316	0.0444533	53	47	0	X
P00751	CFB	Complement factor B	0.873854	0.0263612	53	47	0	X
Q9Y285	FARSA	Phenylalanine--tRNA ligase alpha subunit	0.873754	0.0156817	53	47	0
P04424	ASL	Argininosuccinate lyase	0.873451	0.00513373	43	37	20
P63173	RPL38	60S ribosomal protein L38	0.872489	0.0244464	45	42	13
Q9HC38	GLOD4	Glyoxalase domain-containing protein 4	0.872391	0.00116966	53	47	0
Q9Y2D4	EXOC6B	Exocyst complex component 6B	0.872314	0.025031	53	47	0
P08559	PDHA1	Pyruvate dehydrogenase E1 component subunit alpha, somatic form, mitochondrial	0.871317	0.0035484	53	47	0
O75569	PRKRA	Interferon-inducible double-stranded RNA-dependent protein kinase activator A	0.870084	0.0156053	45	41	14
Q9UFN0	NIPSNAP3A	Protein NipSnap homolog 3A	0.869883	0.0413241	53	47	0
Q9NVD7	PARVA	Alpha-parvin	0.869464	0.0178755	52	47	1	X
P63244	RACK1	Receptor of activated protein C kinase 1	0.869152	0.0133927	53	47	0	X
Q02543	RPL18A	60S ribosomal protein L18a	0.868416	0.0262788	53	47	0
E9PAV3	NACA	Nascent polypeptide-associated complex subunit alpha, muscle-specific form	0.868174	0.0350223	53	47	0
P62249	RPS16	40S ribosomal protein S16	0.86801	0.000736742	53	47	0
P62269	RPS18	40S ribosomal protein S18	0.866568	0.00163226	53	47	0
Q92625	ANKS1A	Ankyrin repeat and SAM domain-containing protein 1A	0.864828	0.0218911	44	36	20
Q7Z4H8	POGLUT3	Protein O-glucosyltransferase 3	0.864721	0.0143074	49	45	6
Q92734	TFG	Protein TFG	0.864061	0.000927577	53	47	0
P53985	SLC16A1	Monocarboxylate transporter 1	0.863885	0.0148389	49	43	8	X
Q96TA1	NIBAN2	Protein Niban 2	0.863744	0.0178755	53	47	0	X
P27635	RPL10	60S ribosomal protein L10	0.862268	0.0321932	53	47	0
P62701	RPS4X	40S ribosomal protein S4, X isoform	0.862193	0.022428	53	47	0
Q9NQW7	XPNPEP1	Xaa-Pro aminopeptidase 1	0.86184	0.00342437	53	47	0
P62258	YWHAE	14-3-3 protein epsilon	0.860475	0.0178788	53	47	0	X
Q9H845	ACAD9	Complex I assembly factor ACAD9, mitochondrial	0.860277	0.00304249	53	47	0
Q9H223	EHD4	EH domain-containing protein 4	0.858787	0.0212017	53	47	0	X
Q9Y230	RUVBL2	RuvB-like 2	0.858587	0.00467977	53	47	0
Q96CN7	ISOC1	Isochorismatase domain-containing protein 1	0.857458	0.0281993	53	47	0
Q9BX66	SORBS1	Sorbin and SH3 domain-containing protein 1	0.857396	0.0349615	53	47	0	X
Q9UHY1	NRBP1	Nuclear receptor-binding protein	0.857132	0.004584	45	39	16
P35611	ADD1	Alpha-adducin	0.856655	0.0417751	53	47	0	X
P31948	STIP1	Stress-induced-phosphoprotein 1	0.855562	0.00694178	53	47	0
P51114	FXR1	Fragile X mental retardation syndrome-related protein 1	0.85556	0.0144175	45	42	13
P36578	RPL4	60S ribosomal protein L4	0.854977	0.016685	53	47	0
P63151	PPP2R2A	Serine/threonine-protein phosphatase 2A 55 kDa regulatory subunit B alpha isoform	0.854773	0.0160044	53	47	0
P61981	YWHAG	14-3-3 protein gamma	0.854735	0.00443963	53	47	0
Q03154	ACY1	Aminoacylase-1	0.854657	0.0218911	53	47	0
P49189	ALDH9A1	4-trimethylaminobutyraldehyde dehydrogenase	0.854505	0.00811699	53	47	0
P62244	RPS15A	40S ribosomal protein S15a	0.853831	0.000430325	53	47	0
P11177	PDHB	Pyruvate dehydrogenase E1 component subunit beta, mitochondrial	0.853471	0.00263479	53	47	0
P32969	RPL9	60S ribosomal protein L9	0.85325	0.00229569	53	47	0
P05166	PCCB	Propionyl-CoA carboxylase beta chain, mitochondrial	0.852794	0.00725239	53	47	0
P46783	RPS10	40S ribosomal protein S10	0.852567	0.0395357	53	47	0
P38117	ETFB	Electron transfer flavoprotein subunit beta	0.851928	0.00613177	53	47	0
P35613	BSG	Basigin	0.851856	0.0301252	53	47	0	X
P62829	RPL23	60S ribosomal protein L23	0.851117	0.00694178	53	47	0
Q9H3S7	PTPN23	Tyrosine-protein phosphatase non-receptor type 23	0.850819	0.0106071	50	44	6
P61970	NUTF2	Nuclear transport factor 2	0.849154	0.0469498	53	47	0
P62888	RPL30	60S ribosomal protein L30	0.849007	0.00323761	53	47	0
P61313	RPL15	60S ribosomal protein L15	0.848958	0.0212545	53	47	0
P15880	RPS2	40S ribosomal protein S2	0.848753	0.0444533	53	47	0
Q9HA64	FN3KRP	Ketosamine-3-kinase	0.848743	0.0263612	45	43	12
O95747	OXSR1	Serine/threonine-protein kinase OSR1	0.847602	0.000838437	53	47	0
Q99598	TSNAX	Translin-associated protein X	0.84746	0.00873763	53	47	0
Q9H4M9	EHD1	EH domain-containing protein 1	0.846975	0.0207509	53	47	0	X
P62857	RPS28	40S ribosomal protein S28	0.846357	0.0391321	53	47	0
Q6ICL3	TANGO2	Transport and Golgi organization protein 2 homolog	0.846193	0.0169961	53	47	0
O60547	GMDS	GDP-mannose 4,6 dehydratase	0.845823	0.0256212	48	46	6
P08708	RPS17	40S ribosomal protein S17	0.845657	0.0362279	53	47	0
P62424	RPL7A	60S ribosomal protein L7a	0.845504	0.00176705	53	47	0
Q9NSD9	FARSB	Phenylalanine--tRNA ligase beta subunit	0.845209	0.000537279	53	47	0
Q02878	RPL6	60S ribosomal protein L6	0.84499	0.0134854	53	47	0
Q9BRX8	PRXL2A	Peroxiredoxin-like 2A	0.844481	0.0204726	53	47	0
Q14344	GNA13	Guanine nucleotide-binding protein subunit alpha-13	0.844176	0.000657255	53	47	0	X
P11766	ADH5	Alcohol dehydrogenase class-3	0.843813	0.00626895	53	47	0
P61247	RPS3A	40S ribosomal protein S3a	0.843673	0.00740968	53	47	0
Q9BTV4	TMEM43	Transmembrane protein 43	0.842815	0.00241409	53	47	0
P46777	RPL5	60S ribosomal protein L5	0.841637	0.00766251	53	47	0
Q9H9P8	L2HGDH	L-2-hydroxyglutarate dehydrogenase, mitochondrial	0.84097	0.00311135	44	36	20
P01024	C3	Complement C3	0.840097	0.0108401	53	47	0	X
P26373	RPL13	60S ribosomal protein L13	0.839839	0.00183632	53	47	0
P46776	RPL27A	60S ribosomal protein L27a	0.838229	0.00336661	53	47	0
Q8N1G4	LRRC47	Leucine-rich repeat-containing protein 47	0.837761	3.12951e-05	53	47	0
Q9Y3B8	REXO2	Oligoribonuclease, mitochondrial	0.837075	0.00101646	42	38	20
Q8N163	CCAR2	Cell cycle and apoptosis regulator protein 2	0.837004	0.00341544	53	47	0
P10768	ESD	S-formylglutathione hydrolase	0.836958	0.00820144	53	47	0
O43399	TPD52L2	Tumor protein D54	0.836278	0.0239626	53	47	0
Q14624	ITIH4	Inter-alpha-trypsin inhibitor heavy chain H4	0.836093	0.00343206	53	47	0	X
P39023	RPL3	60S ribosomal protein L3	0.835775	0.00242992	53	47	0
P46779	RPL28	60S ribosomal protein L28	0.8356	0.0218911	53	47	0
Q00577	PURA	Transcriptional activator protein Pur-alpha	0.835067	0.00310672	53	47	0
O15116	LSM1	U6 snRNA-associated Sm-like protein LSm1	0.83503	0.00049759	41	40	19
P13797	PLS3	Plastin-3	0.834835	0.00883066	53	47	0	X
P13861	PRKAR2A	cAMP-dependent protein kinase type II-alpha regulatory subunit	0.834082	5.92913e-06	53	47	0	X
P39019	RPS19	40S ribosomal protein S19	0.834068	0.00620464	53	47	0
O60825	PFKFB2	6-phosphofructo-2-kinase/fructose-2,6-bisphosphatase 2	0.833809	0.00807156	53	47	0
P62913	RPL11	60S ribosomal protein L11	0.833202	0.00134417	52	47	1
P50914	RPL14	60S ribosomal protein L14	0.832981	0.0482093	53	47	0
P33316	DUT	Deoxyuridine 5~-triphosphate nucleotidohydrolase, mitochondrial	0.831841	0.00948962	48	46	6
P18124	RPL7	60S ribosomal protein L7	0.83177	0.00879593	53	47	0
P55010	EIF5	Eukaryotic translation initiation factor 5	0.831712	0.0112155	53	47	0	X
P62266	RPS23	40S ribosomal protein S23	0.83067	0.00377424	53	47	0
Q00059	TFAM	Transcription factor A, mitochondrial	0.830093	0.0165781	46	40	14
P83731	RPL24	60S ribosomal protein L24	0.829476	0.0474389	53	47	0
P62263	RPS14	40S ribosomal protein S14	0.828923	0.00513373	53	47	0
P29401	TKT	Transketolase	0.828323	0.00176705	53	47	0
Q6PI48	DARS2	Aspartate--tRNA ligase, mitochondrial	0.827721	0.0168911	53	47	0
P30041	PRDX6	Peroxiredoxin-6	0.827629	0.000763016	53	47	0
Q13126	MTAP	S-methyl-5~-thioadenosine phosphorylase	0.827365	0.021281	53	47	0
Q15631	TSN	Translin	0.827303	0.00187838	53	47	0
P11216	PYGB	Glycogen phosphorylase, brain form	0.826267	0.0158397	53	47	0
P62851	RPS25	40S ribosomal protein S25	0.825496	0.00108241	53	47	0
Q02880	TOP2B	DNA topoisomerase 2-beta	0.823243	0.000518201	53	47	0
Q9NZ45	CISD1	CDGSH iron-sulfur domain-containing protein 1	0.82271	0.0115427	53	47	0
P40429	RPL13A	60S ribosomal protein L13a	0.820747	0.00176705	53	47	0
P51149	RAB7A	Ras-related protein Rab-7a	0.820627	1.18152e-05	53	47	0	X
Q9NQT8	KIF13B	Kinesin-like protein KIF13B	0.819961	0.000303016	44	37	19
P62910	RPL32	60S ribosomal protein L32	0.81858	0.00960066	53	47	0
P00568	AK1	Adenylate kinase isoenzyme 1	0.817334	0.0133867	53	47	0
P30050	RPL12	60S ribosomal protein L12	0.817027	8.38515e-05	53	47	0
P08865	RPSA	40S ribosomal protein SA	0.81641	0.00138255	53	47	0	X
P35573	AGL	Glycogen debranching enzyme	0.815785	0.0110215	53	47	0
P05388	RPLP0	60S acidic ribosomal protein P0	0.814897	0.000205915	53	47	0
Q9UDY2	TJP2	Tight junction protein ZO-2	0.814673	0.00108241	40	42	18	X
P10599	TXN	Thioredoxin	0.81446	0.0107946	53	47	0
P63092	GNAS	Guanine nucleotide-binding protein G(s) subunit alpha isoforms short	0.813729	8.38864e-05	53	47	0	X
P28072	PSMB6	Proteasome subunit beta type-6	0.813319	0.0142255	53	47	0
Q07020	RPL18	60S ribosomal protein L18	0.813293	0.0269269	53	47	0
O60313	OPA1	Dynamin-like 120 kDa protein, mitochondrial	0.812344	1.24765e-05	53	47	0
P62081	RPS7	40S ribosomal protein S7	0.811039	0.000878694	53	47	0
P46781	RPS9	40S ribosomal protein S9	0.81094	0.00963576	53	47	0
P13804	ETFA	Electron transfer flavoprotein subunit alpha, mitochondrial	0.808053	0.00035179	53	47	0
P62906	RPL10A	60S ribosomal protein L10a	0.807053	0.000190552	53	47	0
P05386	RPLP1	60S acidic ribosomal protein P1	0.805231	0.0123905	53	47	0
P99999	CYCS	Cytochrome c	0.804386	0.0462811	53	47	0
P18621	RPL17	60S ribosomal protein L17	0.802379	0.00173777	53	47	0
Q9NXF1	TEX10	Testis-expressed protein 10	0.80215	0.00384417	53	47	0
Q9Y265	RUVBL1	RuvB-like 1	0.800019	2.43464e-05	53	47	0
P62847	RPS24	40S ribosomal protein S24	0.799527	0.0212979	48	46	6
P00505	GOT2	Aspartate aminotransferase, mitochondrial	0.7985	0.0042153	53	47	0	X
P41567	EIF1	Eukaryotic translation initiation factor 1	0.797409	0.0170074	53	47	0
P42766	RPL35	60S ribosomal protein L35	0.796687	0.00370502	48	46	6
Q9NQR4	NIT2	Omega-amidase NIT2	0.796645	4.83317e-06	53	47	0
O95757	HSPA4L	Heat shock 70 kDa protein 4L	0.795951	0.0239529	51	44	5
P60033	CD81	CD81 antigen	0.795357	0.011367	53	47	0	X
P62899	RPL31	60S ribosomal protein L31	0.794934	7.27096e-05	53	47	0
O94903	PLPBP	Pyridoxal phosphate homeostasis protein	0.793837	0.00424979	47	40	13
Q9HB90	RRAGC	Ras-related GTP-binding protein C	0.793213	0.00379668	53	47	0
O95219	SNX4	Sorting nexin-4	0.792587	0.000384065	45	42	13	X
P62280	RPS11	40S ribosomal protein S11	0.791394	0.003934	53	47	0
P0DMV8	HSPA1A	Heat shock 70 kDa protein 1A	0.791299	0.0022224	53	47	0	X
Q04760	GLO1	Lactoylglutathione lyase	0.79045	0.00320996	53	47	0	X
O43301	HSPA12A	Heat shock 70 kDa protein 12A	0.789312	0.0463654	53	47	0
Q96I99	SUCLG2	Succinate--CoA ligase [GDP-forming] subunit beta, mitochondrial	0.788685	4.82811e-05	53	47	0	X
P29992	GNA11	Guanine nucleotide-binding protein subunit alpha-11	0.788395	2.43464e-05	53	47	0	X
P07195	LDHB	L-lactate dehydrogenase B chain	0.787912	0.000411124	53	47	0
P10644	PRKAR1A	cAMP-dependent protein kinase type I-alpha regulatory subunit	0.787724	0.00130057	53	47	0	X
P27816	MAP4	Microtubule-associated protein 4	0.783845	0.00451802	53	47	0	X
Q9BY44	EIF2A	Eukaryotic translation initiation factor 2A	0.782842	0.00250444	47	40	13
P23396	RPS3	40S ribosomal protein S3	0.782717	9.17413e-05	53	47	0	X
P50502	ST13	Hsc70-interacting protein	0.782538	0.000171458	53	47	0
P46976	GYG1	Glycogenin-1	0.782054	7.58499e-05	53	47	0
Q8NBS9	TXNDC5	Thioredoxin domain-containing protein 5	0.779291	0.0035484	53	47	0
P13798	APEH	Acylamino-acid-releasing enzyme	0.778748	3.10693e-06	53	47	0
Q8WUM4	PDCD6IP	Programmed cell death 6-interacting protein	0.77814	5.92913e-06	53	47	0
Q08623	PUDP	Pseudouridine-5~-phosphatase	0.777284	0.00819977	50	43	7
Q16555	DPYSL2	Dihydropyrimidinase-related protein 2	0.776345	0.0023817	53	47	0	X
P51649	ALDH5A1	Succinate-semialdehyde dehydrogenase, mitochondrial	0.774159	0.00178754	50	44	6
Q96I59	NARS2	Probable asparagine--tRNA ligase, mitochondrial	0.77324	0.00299701	53	47	0
Q92506	HSD17B8	Estradiol 17-beta-dehydrogenase 8	0.77225	0.00218244	53	47	0	X
Q9Y3A5	SBDS	Ribosome maturation protein SBDS	0.77216	4.77092e-06	53	47	0
P30086	PEBP1	Phosphatidylethanolamine-binding protein 1	0.771089	0.00101646	53	47	0
P50453	SERPINB9	Serpin B9	0.769467	0.0234701	53	47	0
O94826	TOMM70	Mitochondrial import receptor subunit TOM70	0.765244	0.000184628	53	47	0
O15488	GYG2	Glycogenin-2	0.764349	0.000108189	53	46	1
Q9UEY8	ADD3	Gamma-adducin	0.761655	0.000641768	53	47	0	X
P46778	RPL21	60S ribosomal protein L21	0.759901	0.00192747	53	47	0
P30837	ALDH1B1	Aldehyde dehydrogenase X, mitochondrial	0.757996	0.0302583	53	47	0
P50135	HNMT	Histamine N-methyltransferase	0.753461	0.000888573	53	47	0
P09960	LTA4H	Leukotriene A-4 hydrolase	0.752053	1.79022e-05	53	47	0
Q6NZI2	CAVIN1	Caveolae-associated protein 1	0.740208	0.00384417	53	47	0	X
Q8WZA0	LZIC	Protein LZIC	0.736765	0.00294634	42	40	18
Q53EL6	PDCD4	Programmed cell death protein 4	0.735134	0.00111798	53	47	0
P61225	RAP2B	Ras-related protein Rap-2b	0.731044	8.10219e-05	53	47	0	X
P04792	HSPB1	Heat shock protein beta-1	0.726012	1.38256e-05	53	47	0	X
Q9UBI6	GNG12	Guanine nucleotide-binding protein G(I)/G(S)/G(O) subunit gamma-12	0.721848	0.00163226	45	40	15	X
Q9BZQ8	NIBAN1	Protein Niban 1	0.720387	0.00116966	53	47	0	X
Q8NC51	SERBP1	Plasminogen activator inhibitor 1 RNA-binding protein	0.717531	0.0160044	53	47	0	X
P28161	GSTM2	Glutathione S-transferase Mu 2	0.709601	0.000536073	53	47	0
Q9P0M6	MACROH2A2	Core histone macro-H2A.2	0.707508	1.10841e-05	47	39	14
Q9NUJ1	ABHD10	Mycophenolic acid acyl-glucuronide esterase, mitochondrial	0.70663	6.79821e-07	53	47	0
Q14240	EIF4A2	Eukaryotic initiation factor 4A-II	0.69739	2.26005e-07	53	47	0
P05387	RPLP2	60S acidic ribosomal protein P2	0.696787	4.11203e-05	53	47	0
P34913	EPHX2	Bifunctional epoxide hydrolase 2	0.687742	8.38864e-05	53	47	0
Q02252	ALDH6A1	Methylmalonate-semialdehyde dehydrogenase [acylating], mitochondrial	0.681163	1.28375e-06	53	47	0
P21266	GSTM3	Glutathione S-transferase Mu 3	0.676253	0.00255637	53	47	0
P09211	GSTP1	Glutathione S-transferase P	0.67261	0.00550261	53	47	0	X
Q02338	BDH1	D-beta-hydroxybutyrate dehydrogenase, mitochondrial	0.671838	1.38256e-05	50	44	6
O75891	ALDH1L1	Cytosolic 10-formyltetrahydrofolate dehydrogenase	0.604304	4.64065e-06	46	42	12
Differentially expressed proteins were identified by LC MS/MS iTRAQ technology as described in Methods. Criteria for differential expression: a linear protein ratio (Met /NoMet ) ≥ 1SD from the mean (n = 3935 proteins), adjusted p-value ≤ 0.05 adjusted and imputation ≤ 20%. Predicted cell surface localization reflects UniProt GO designation for plasma membrane.
