# Supplementary material for: Proteomics of Primary Uveal Melanoma: Insights into Metastasis and Protein Biomarkers
Source: Cancers (Basel). 2021 Jul 14;13(14):3520. doi: 10.3390/cancers13143520 (PMC8307952; doi:10.3390/cancers13143520)
Supplement: Supplementary file 1 [file cancers-13-03520-s001.zip › Table S7. Pathways - DE Proteins Elevated in Metastasizing pUM.xlsx]

## Sheet: Table S7.Pathways Up Mets n191
	Supplementary Table S7. Over-Represented Pathways Associated with 191 DE Proteins Elevated in Metastasizing pUM*
	Reactome Pathways			Entities
				Found	Total	Ratio	p-value	FDR
	Immune System			111	2681	0.184616	1.11022e-16	8.54872e-15
		Adaptive Immune System		54	1004	0.0691365	4.85745e-12	2.86589e-10
			Class I MHC mediated antigen processing & presentation	46	473	0.0325713	1.11022e-16	8.54872e-15
			Antigen Presentation: Folding, assembly and peptide loading of class I MHC	41	102	0.00702383	1.11022e-16	8.54872e-15
			ER-Phagosome pathway	40	173	0.011913	1.11022e-16	8.54872e-15
			Antigen processing-Cross presentation	40	195	0.0134279	1.11022e-16	8.54872e-15
			Immunoregulatory interactions between a Lymphoid and a non-Lymphoid cell	37	316	0.0217601	1.11022e-16	8.54872e-15
			Endosomal/Vacuolar pathway	36	82	0.00564661	1.11022e-16	8.54872e-15
			MHC class II antigen presentation	8	148	0.0101914	0.00815566	ns
		Cytokine Signaling in Immune system		63	1092	0.0751963	2.10942e-15	1.4766e-13
			Interferon Signaling	50	394	0.0271312	1.11022e-16	8.54872e-15
			Interferon gamma signaling	44	250	0.0172153	1.11022e-16	8.54872e-15
			Interferon alpha/beta signaling	44	188	0.0129459	1.11022e-16	8.54872e-15
			Interleukin-12 family signaling	10	96	0.00661066	2.00545e-05	0.000762071
			Interleukin-12 signaling	7	84	0.00578433	0.00128687	0.030885
			Interleukin-27 signaling	3	13	0.000895193	0.00209361	0.048153
		Innate Immune System		50	1333	0.0917918	3.13338e-06	0.000141002
			Neutrophil degranulation	37	480	0.0330533	8.95173e-13	5.72911e-11
	Vesicle-mediated Transport			20	824	0.0567415	ns	ns
		ER to Golgi Anterograde Transport		12	164	0.0112932	9.19501e-05	0.0029424
		Transport to the Golgi and subsequent modification		12	219	0.0150806	0.00118393	0.0284142
		COPI-mediated anterograde transport		10	107	0.00736813	4.94621e-05	0.00173117
		Golgi-to-ER retrograde transport		10	148	0.0101914	0.000644673	0.0161168
		COPI-dependent Golgi-to-ER retrograde traffic		9	107	0.00736813	0.000254099	0.00762296
	Metabolism of Proteins			54	2334	0.160722	ns	ns
		Asparagine N-linked glycosylation		19	421	0.0289905	0.000546881	0.0142189
		Unfolded Protein Response (UPR)		16	155	0.0106735	7.61232e-08	4.18678e-06
		IRE1alpha activates chaperones		11	101	0.00695496	5.12766e-06	0.000215362
		XBP1(S) activates chaperone genes		10	95	0.0065418	1.83624e-05	0.000734495
		ATF6 (ATF6-alpha) activates chaperone genes		6	15	0.00103292	5.67906e-07	2.89632e-05
		ATF6 (ATF6-alpha) activates chaperones		6	17	0.00117064	1.16571e-06	5.59543e-05
	Hemostasis			18	801	0.0551577	ns	ns
		Platelet degranulation		10	137	0.00943396	0.000356917	0.00999369
		Response to elevated platelet cytosolic Ca2+		10	144	0.00991599	0.000523515	0.0141349
	Extracellular Matrix Organization			14	329	0.0226553	0.00478214	ns
	Cell Cycle			9	734	0.050544	ns	ns
		Golgi Cisternae Pericentriolar Stack Reorganization		4	17	0.00117064	0.000349514	0.00999369
	*Reactome pathway analysis of 191 Differentially Expressed (DE) proteins elevated in metastasizing pUM (see Table S6) was performed with gene names and Reactome version 76. "Entities" denote all Reactome curated molecules (proteins, genes, small molecules, transcripts) used to identify the indicated pathways. Entities Ratio reflects the proportion of entities found relative to the total; p-value …
