# Supplementary material for: Proteomics of Primary Uveal Melanoma: Insights into Metastasis and Protein Biomarkers
Source: Cancers (Basel). 2021 Jul 14;13(14):3520. doi: 10.3390/cancers13143520 (PMC8307952; doi:10.3390/cancers13143520)
Supplement: Supplementary file 1 [file cancers-13-03520-s001.zip › Table S8. Pathways - DE Proteins Elevated in Non-Metastasizing pUM.xlsx]

## Sheet: Table S8.Pathways UpNoMets n211
	Supplementary Table S8. Over-Represented Pathways Associated with 211 DE Proteins Elevated in Non-Metastasizing pUM*
	Reactome Pathways			Entities
				Found	Total	Ratio	p-value	FDR
	Metabolism of Proteins			83	2334	0.160722	1.45439e-14	2.90878e-13
		Translation		64	339	0.0233439	1.11022e-16	2.33147e-15
		Eukaryotic Translation Initiation		59	130	0.00895193	1.11022e-16	2.33147e-15
		Cap-dependent Translation Initiation		59	130	0.00895193	1.11022e-16	2.33147e-15
		L13a-mediated translational silencing of Ceruloplasmin expression		59	120	0.00826332	1.11022e-16	2.33147e-15
		GTP hydrolysis and joining of the 60S ribosomal subunit		59	120	0.00826332	1.11022e-16	2.33147e-15
		Formation of a pool of free 40S subunits		57	106	0.00729927	1.11022e-16	2.33147e-15
		Eukaryotic Translation Termination		55	106	0.00729927	1.11022e-16	2.33147e-15
		SRP-dependent cotranslational protein targeting to membrane		54	119	0.00819446	1.11022e-16	2.33147e-15
		Eukaryotic Translation Elongation		54	102	0.00702383	1.11022e-16	2.33147e-15
		Peptide chain elongation		54	97	0.00667952	1.11022e-16	2.33147e-15
		Activation of the mRNA upon binding of the cap-binding complex and eIFs, and subsequent binding to 43S		26	66	0.00454483	1.11022e-16	2.33147e-15
		Ribosomal scanning and start codon recognition		26	64	0.00440711	1.11022e-16	2.33147e-15
		Translation initiation complex formation		26	62	0.00426938	1.11022e-16	2.33147e-15
		Formation of the ternary complex, and subsequently, the 43S complex		25	54	0.0037185	1.11022e-16	2.33147e-15
		The citric acid (TCA) cycle and respiratory electron transport		14	235	0.0161823	1.94846e-05	0.000331238
		Pyruvate metabolism and Citric Acid (TCA) cycle		10	97	0.00667952	3.19397e-06	5.74915e-05
		Glutathione conjugation		6	67	0.00461369	0.000641611	0.00962416
		Pyruvate metabolism		6	56	0.00385622	0.00025119	0.00401903
		Glucagon-like Peptide-1 (GLP1) regulates insulin secretion		5	49	0.00337419	0.00102513	0.0143518
		Glucagon signaling in metabolic regulation		5	40	0.00275444	0.000415028	0.00664045
		PKA activation in glucagon signalling		4	23	0.0015838	0.000470841	0.00706261
	Metabolism of RNA			65	782	0.0538493	1.11022e-16	2.33147e-15
		rRNA processing		55	245	0.016871	1.11022e-16	2.33147e-15
		rRNA processing in the nucleus and cytosol		55	207	0.0142542	1.11022e-16	2.33147e-15
		Major pathway of rRNA processing in the nucleolus and cytosol		55	189	0.0130147	1.11022e-16	2.33147e-15
		Nonsense Mediated Decay (NMD) enhanced by the Exon Junction Complex (EJC)		54	124	0.00853877	1.11022e-16	2.33147e-15
		Nonsense Mediated Decay (NMD) independent of the Exon Junction Complex (EJC)		54	101	0.00695496	1.11022e-16	2.33147e-15
	Metabolism			117	3634	0.250241	1.11022e-16	2.33147e-15
		Metabolism of amino acids and derivatives		66	661	0.0455171	1.11022e-16	2.33147e-15
		Selenoamino acid metabolism		55	180	0.012395	1.11022e-16	2.33147e-15
		Selenocysteine synthesis		54	112	0.00771244	1.11022e-16	2.33147e-15
	Developmental Biology			59	1262	0.0869026	4.996e-15	9.99201e-14
		Nervous system development		59	620	0.0426938	1.11022e-16	2.33147e-15
		Axon guidance		59	584	0.0402148	1.11022e-16	2.33147e-15
		Signaling by ROBO receptors		57	235	0.0161823	1.11022e-16	2.33147e-15
		Regulation of expression of SLITs and ROBOs		55	183	0.0126016	1.11022e-16	2.33147e-15
	Cellular Responses to External Stimuli			77	829	0.0570858	1.11022e-16	2.33147e-15
		Cellular responses to stress		77	811	0.0558463	1.11022e-16	2.33147e-15
		Response of EIF2AK4 (GCN2) to amino acid deficiency		55	115	0.00791902	1.11022e-16	2.33147e-15
		Cellular response to heat stress		15	135	0.00929624	4.06856e-09	7.3234e-08
		Regulation of HSF1-mediated heat shock response		15	113	0.0077813	3.78788e-10	7.19697e-09
		HSF1 activation		8	43	0.00296102	4.33894e-07	7.8101e-06
		HSF1-dependent transactivation		7	59	0.0040628	4.09177e-05	0.000654682
		Attenuation phase		7	47	0.00323647	9.71798e-06	0.000165206
	Immune System			28	2681	0.184616	ns	ns
		Innate Immune System		16	1333	0.0917918	ns	ns
		Cytokine Signaling in Immune system		14	1092	0.0751963	ns	ns
		Interleukin-12 signaling		6	84	0.00578433	0.00201388	0.0281943
		Gene and protein expression by JAK-STAT signaling after Interleukin-12 stimulation		6	73	0.00502686	0.000995583	0.0143518
		Adaptive Immune System		4	1004	0.0691365	ns	ns
	*Reactome pathway analysis of 211 Differetially Expressed (DE) proteins elevated in non-metastasizing pUM (and decreased in metastasiaing pUM, see Table S6) was performed with gene names and Reactome version 76. "Entities" denote all Reactome curated molecules (proteins, genes, small molecules, transcripts) used to identify the indicated pathways. Entities Ratio reflects the proportion of entitie…
