# Supplementary material for: Proteomics of Primary Uveal Melanoma: Insights into Metastasis and Protein Biomarkers
Source: Cancers (Basel). 2021 Jul 14;13(14):3520. doi: 10.3390/cancers13143520 (PMC8307952; doi:10.3390/cancers13143520)
Supplement: Supplementary file 1 [file cancers-13-03520-s001.zip › Table S9. Immune Proteins.xlsx]

## Sheet: Table S9
Supplementary Table S9. Immune Proteins Quantified in Metastasizing and Non-Metastasizing pUM* 778 Proteins Sorted by Gene Name
Bioinformatic Source	UniProt Accession Number	Gene	Differentially Expressed Proteins	Immune Checkpoint Proteins	Immune Suppressive Proteins	Protein	Metastasizing pUM				Non-Metastasizing pUM
							Protein Ratio pUM/Control	Adjusted p-value	Count Total=53		Protein Ratio pUM/Control	Adjusted p-Value	Count Total=47
1,2	P01023	A2M	X			Alpha-2-macroglobulin	0.428311	1.89829e-25	53		0.356812	2.68358e-27	47
1	Q8NE71	ABCF1				ATP-binding cassette sub-family F member 1	1.28466	2.93095e-06	53		1.34897	4.95653e-08	47
2	Q8IZP0	ABI1				Abl interactor 1	0.935198	6.48178e-14	3		0.9382	1.54633e-10	3
1	Q13085	ACACA				Acetyl-CoA carboxylase 1	0.886826	6.80178e-06	5		0.926512	7.15288e-13	1
1,3,4	P49748	ACADVL	X			Very long-chain specific acyl-CoA dehydrogenase, mitochondrial	0.904639	0.00179956	53		0.783904	7.07568e-10	47
1	Q9BWD1	ACAT2				Acetyl-CoA acetyltransferase, cytosolic	0.821567	6.09976e-09	53		0.753	1.15227e-08	47
3,4	P53396	ACLY	X			ATP-citrate synthase	1.15364	3.09351e-07	53		1.02728	0.302341	47
1	Q86TX2	ACOT1				Acyl-coenzyme A thioesterase 1	1.10883	0.000112503	12		1.08512	0.0302366	14
1	P49753	ACOT2				Acyl-coenzyme A thioesterase 2, mitochondrial	0.972246	0.220237	4		0.955641	0.0227545	2
4	P11117	ACP2	X			Lysosomal acid phosphatase	1.09342	0.0176448	52		0.879114	0.00583866	46
1	O95573	ACSL3				Long-chain-fatty-acid--CoA ligase 3	0.987732	0.629839	53		0.909236	0.000429592	47
1	Q9UKU0	ACSL6				Long-chain-fatty-acid--CoA ligase 6	0.888422	4.51839e-05	4		0.908922	5.39963e-06	2
2	P68133	ACTA1				Actin, alpha skeletal muscle	0.861909	0.0294075	27		0.830366	0.00651848	20
2	P62736	ACTA2				Actin, aortic smooth muscle	0.433286	5.69283e-25	28		0.386245	5.90596e-22	27
2,3,4	P60709	ACTB	X			Actin, cytoplasmic 1	1.3881	1.70169e-11	50		1.16599	3.27677e-06	44
2	P68032	ACTC1				Actin, alpha cardiac muscle 1	0.719012	4.75316e-07	14		0.721247	5.303e-05	11
2	P63261	ACTG1				Actin, cytoplasmic 2	0.948613	0.000103208	3		0.947215	3.16168e-05	3
2	P12814	ACTN1				Alpha-actinin-1	1.03596	0.194782	53		0.928421	0.0311402	47
2	O43707	ACTN4				Alpha-actinin-4	1.10253	0.0065144	53		1.14575	4.28968e-05	47
2	P61160	ACTR2				Actin-related protein 2	1.13691	3.72112e-07	53		1.1141	7.16204e-05	47
2	P61158	ACTR3				Actin-related protein 3	0.983559	0.552633	53		0.957893	0.130415	47
1,2	P00813	ADA				Adenosine deaminase	1.08733	0.0312906	8		1.08567	0.0770899	6
2	P55265	ADAR				Double-stranded RNA-specific adenosine deaminase	1.01066	0.725121	53		0.956767	0.233035	47
1,3,4	P48960	ADGRE5	X			Adhesion G protein-coupled receptor E5	1.13798	0.00115852	53		0.941058	0.131623	47
2	P55196	AFDN				Afadin	0.702441	1.54806e-06	46		0.718655	3.6358e-06	40
1	Q53H12	AGK				Acylglycerol kinase, mitochondrial	1.04266	0.213474	53		1.1247	0.0258073	47
3,4	P35573	AGL	X			Glycogen debranching enzyme	0.449742	1.389e-30	53		0.551299	2.46102e-14	47
1,2	O95831	AIFM1				Apoptosis-inducing factor 1, mitochondrial	1.00316	0.920097	53		0.950082	0.0493926	47
1	P27144	AK4				Adenylate kinase 4, mitochondrial	0.860855	3.58125e-05	27		0.841652	9.61182e-07	17
1,2	P31749	AKT1				RAC-alpha serine/threonine-protein kinase	1.12217	3.07661e-06	35		1.26737	5.4094e-11	33
1,2	P31751	AKT2				RAC-beta serine/threonine-protein kinase	0.699586	7.81502e-09	24		0.790476	4.70918e-08	23
1,2	Q9Y243	AKT3				RAC-gamma serine/threonine-protein kinase	1.04931	0.0342364	7		1.15032	8.61725e-06	6
2	P02768	ALB				Albumin	0.135815	1.90102e-36	53		0.14923	3.03375e-30	47
1	P00352	ALDH1A1			X	Retinal dehydrogenase 1	0.435853	1.58727e-14	53		0.365317	5.77799e-12	47
1	P47895	ALDH1A3			X	Aldehyde dehydrogenase family 1 member A3	0.6245	2.03094e-09	7		0.70108	1.26194e-07	6
1	P30837	ALDH1B1	X			Aldehyde dehydrogenase X, mitochondrial	1.49126	5.03554e-09	53		1.96737	5.27455e-11	47
3,4	Q02252	ALDH6A1	X			Methylmalonate-semialdehyde dehydrogenase [acylating], mitochondrial	0.634463	1.80609e-15	53		0.93144	0.120766	47
1	P04075	ALDOA				Fructose-bisphosphate aldolase A	1.24449	2.87144e-11	53		1.23031	3.80912e-10	47
1	P09917	ALOX5				Polyunsaturated fatty acid 5-lipoxygenase	0.937674	0.00258921	3		0.916114	1.51925e-09	4
1	P02760	AMBP			X	Protein AMBP	0.296808	7.10969e-33	53		0.317513	5.40973e-31	47
2	Q9P2R3	ANKFY1				Rabankyrin-5	1.16486	2.15411e-08	53		1.10251	0.000298698	47
2	P39687	ANP32A				Acidic leucine-rich nuclear phosphoprotein 32 family member A	0.986714	0.777645	53		1.03369	0.352846	47
1	Q92688	ANP32B				Acidic leucine-rich nuclear phosphoprotein 32 family member B	1.1752	0.00419121	53		1.26741	2.32961e-06	47
1	P04083	ANXA1				Annexin A1	0.652193	2.57393e-11	53		0.568693	2.73094e-11	47
2	Q16853	AOC3				Membrane primary amine oxidase	0.846347	0.000217068	5		0.912199	0.000119276	1
2	Q10567	AP1B1				AP-1 complex subunit beta-1	1.01163	0.498781	53		0.91522	2.41983e-05	47
2	O43747	AP1G1				AP-1 complex subunit gamma-1	0.900928	7.89313e-05	53		0.851033	2.41571e-09	47
2	O75843	AP1G2				AP-1 complex subunit gamma-like 2	1.54313	8.21663e-14	50		1.38624	1.25954e-08	43
2	Q9BXS5	AP1M1				AP-1 complex subunit mu-1	0.855788	0.000104765	53		0.848436	3.86134e-06	47
2	P56377	AP1S2				AP-1 complex subunit sigma-2	1.03113	0.344585	53		1.01198	0.733571	47
2	O95782	AP2A1				AP-2 complex subunit alpha-1	0.754583	1.83595e-20	53		0.759532	6.71848e-17	47
2	O94973	AP2A2				AP-2 complex subunit alpha-2	0.803244	6.15185e-14	53		0.733468	7.43173e-16	47
2	P63010	AP2B1				AP-2 complex subunit beta	0.891324	4.73194e-10	53		0.877943	1.73687e-08	47
2	Q96CW1	AP2M1				AP-2 complex subunit mu	0.740495	1.23256e-19	50		0.697268	5.4918e-26	43
2	P53680	AP2S1				AP-2 complex subunit sigma	0.886012	8.635e-07	53		0.823017	1.81853e-08	47
2	O00203	AP3B1				AP-3 complex subunit beta-1	1.15891	2.6118e-08	53		1.13565	6.91393e-06	47
2	Q9Y2T2	AP3M1				AP-3 complex subunit mu-1	0.97435	0.402832	50		0.929794	0.00671949	43
2	Q92572	AP3S1				AP-3 complex subunit sigma-1	1.08035	0.00510343	22		1.05855	0.0122563	18
2	O14727	APAF1				Apoptotic protease-activating factor 1	0.920005	3.64267e-11	3		0.927033	9.18498e-13	3
3,4	P13798	APEH	X			Acylamino-acid-releasing enzyme	0.871982	3.72266e-05	53		1.11972	0.000124029	47
2	P27695	APEX1				DNA-(apurinic or apyrimidinic site) endonuclease	0.775783	1.16088e-05	53		0.846829	0.000165612	47
2	P02647	APOA1				Apolipoprotein A-I	0.180128	1.59475e-33	53		0.216659	1.59203e-27	47
2	P02652	APOA2				Apolipoprotein A-II	0.126519	5.70827e-46	53		0.140568	4.97446e-33	47
2	P06727	APOA4				Apolipoprotein A-IV	0.357036	4.85603e-33	53		0.363794	5.58068e-24	47
1,2	P04114	APOB				Apolipoprotein B-100	0.429559	4.03631e-23	53		0.465024	1.84097e-19	47
2	P02654	APOC1				Apolipoprotein C-I	0.219664	2.28591e-31	39		0.233872	1.27584e-33	36
1,2	P02656	APOC3				Apolipoprotein C-III	0.897107	0.00614122	3		0.852192	0.000849577	4
2	P05090	APOD				Apolipoprotein D	0.407992	9.01899e-21	30		0.412648	2.24761e-25	22
1,2	P02649	APOE				Apolipoprotein E	0.279221	3.04316e-29	53		0.284448	6.14797e-32	47
1,2	P05067	APP				Amyloid-beta precursor protein	1.09279	0.00144095	16		0.990018	0.739543	9
2	P10398	ARAF				Serine/threonine-protein kinase A-Raf	0.83904	3.13264e-08	25		0.917184	0.0044005	23
2,3,4	P48444	ARCN1	X			Coatomer subunit delta	1.29264	1.07783e-15	53		1.10329	0.000795149	47
2	P62330	ARF6				ADP-ribosylation factor 6	1.06917	0.00769683	53		1.09357	0.000354814	47
2	Q07960	ARHGAP1				Rho GTPase-activating protein 1	1.10801	0.000305648	53		1.02896	0.407588	47
2	Q9NRY4	ARHGAP35				Rho GTPase-activating protein 35	1.09077	0.00118464	11		1.12401	0.000720033	9
2	P98171	ARHGAP4				Rho GTPase-activating protein 4	0.87381	1.89951e-05	26		0.865819	0.0011644	22
3,4	P40616	ARL1	X			ADP-ribosylation factor-like protein 1	1.27852	7.28805e-12	53		1.06939	0.00267968	47
2	O15143	ARPC1B				Actin-related protein 2/3 complex subunit 1B	1.14945	0.00865495	53		1.20948	1.8048e-05	47
2	O15144	ARPC2				Actin-related protein 2/3 complex subunit 2	1.10091	0.000598132	53		1.0947	0.00257904	47
2	O15145	ARPC3				Actin-related protein 2/3 complex subunit 3	1.34568	2.11677e-11	53		1.30133	2.58855e-10	47
2	P59998	ARPC4				Actin-related protein 2/3 complex subunit 4	1.42462	3.8075e-17	53		1.47197	1.01312e-18	47
2	O15511	ARPC5				Actin-related protein 2/3 complex subunit 5	1.16904	6.78072e-06	52		1.13822	0.000212684	46
2	Q9BPX5	ARPC5L	X			Actin-related protein 2/3 complex subunit 5-like protein	1.00238	0.928	53		1.11995	0.000346944	47
2	P49407	ARRB1				Beta-arrestin-1	0.461902	5.1399e-11	53		0.429835	6.74427e-10	47
3,4	Q13510	ASAH1				Acid ceramidase	1.3997	9.43742e-07	53		1.12441	0.110472	47
4	P04424	ASL	X			Argininosuccinate lyase	0.809786	3.86684e-10	43		0.927111	0.00520444	37
1,2	Q676U5	ATG16L1				Autophagy-related protein 16-1	0.836037	4.03883e-08	33		0.829601	1.05125e-09	27
2	Q9NT62	ATG3				Ubiquitin-like-conjugating enzyme ATG3	1.04933	0.0982277	37		1.17061	1.87513e-06	39
2	Q9Y4P1	ATG4B				Cysteine protease ATG4B	1.10865	7.34731e-05	10		1.11383	0.000723295	10
2	Q96DT6	ATG4C				Cysteine protease ATG4C	0.896377	4.96454e-05	3		0.950518	0.0450257	4
1,2	Q9H1Y0	ATG5				Autophagy protein 5	0.930562	1.35898e-15	3		0.941246	7.24984e-09	4
1,2	O95352	ATG7				Ubiquitin-like modifier-activating enzyme ATG7	0.927755	0.0245681	53		0.981634	0.649302	47
1,3,4	Q13315	ATM	X			Serine-protein kinase ATM	1.11126	0.00752291	47		0.944917	0.198415	40
2,3,4	P16615	ATP2A2	X			Sarcoplasmic/endoplasmic reticulum calcium ATPase 2	1.02343	0.317401	53		0.805661	2.85261e-09	47
2	Q15904	ATP6AP1				V-type proton ATPase subunit S1	1.13461	0.00120806	9		1.07144	0.0742992	11
2	Q93050	ATP6V0A1				V-type proton ATPase 116 kDa subunit a1	0.978329	0.498563	53		0.9485	0.114011	47
2	Q9HBG4	ATP6V0A4				V-type proton ATPase 116 kDa subunit a isoform 4	1.12395	0.00336613	9		0.980574	0.637054	11
2	P27449	ATP6V0C				V-type proton ATPase 16 kDa proteolipid subunit	0.942876	0.580962	53		0.728989	0.0127609	45
2	P61421	ATP6V0D1	X			V-type proton ATPase subunit d 1	1.21122	6.48131e-08	53		1.06517	0.081521	47
2	P38606	ATP6V1A	X			V-type proton ATPase catalytic subunit A	0.896842	5.06975e-05	53		1.01349	0.655993	47
2	P21281	ATP6V1B2				V-type proton ATPase subunit B, brain isoform	0.990884	0.69121	53		1.06393	0.0207513	47
2	P21283	ATP6V1C1				V-type proton ATPase subunit C 1	1.15926	4.64347e-07	53		1.15652	4.2623e-06	47
2	Q9Y5K8	ATP6V1D				V-type proton ATPase subunit D	1.01738	0.587355	53		1.06803	0.0588807	47
2	P36543	ATP6V1E1				V-type proton ATPase subunit E 1	0.885429	0.00157044	53		0.949692	0.139959	47
2	Q16864	ATP6V1F				V-type proton ATPase subunit F	0.864216	0.00143046	46		0.900778	0.130864	40
2	O75348	ATP6V1G1				V-type proton ATPase subunit G 1	1.00616	0.877737	50		1.10287	0.0129979	44
2	Q9UI12	ATP6V1H				V-type proton ATPase subunit H	0.876841	5.15499e-06	53		0.922452	0.00431258	47
2	P20160	AZU1				Azurocidin	1.12973	0.0187893	8		0.917822	0.0397148	5
2,3,4	P61769	B2M	X			Beta-2-microglobulin	1.66177	1.37374e-08	47		0.939773	0.4116	39
1,2	Q16611	BAK1				Bcl-2 homologous antagonist/killer	0.921578	0.0183783	18		0.987796	0.748173	15
1,2	Q07812	BAX				Apoptosis regulator BAX	1.47181	8.03373e-17	36		1.21715	1.07771e-06	30
3,4	P51572	BCAP31				B-cell receptor-associated protein 31	1.32884	3.83897e-12	53		1.20153	2.10126e-06	47
1,2	Q07817	BCL2L1				Bcl-2-like protein 1	0.945045	1.37697e-06	3		0.922995	8.46227e-14	4
1,2	P55957	BID				BH3-interacting domain death agonist	0.710701	7.86798e-09	13		0.723657	6.60574e-07	14
2	Q9NR09	BIRC6				Baculoviral IAP repeat-containing protein 6	0.892634	0.000245966	17		0.959221	0.16293	17
2	P53004	BLVRA				Biliverdin reductase A	0.969779	0.295751	53		0.991932	0.798787	47
2	P30043	BLVRB				Flavin reductase (NADPH)	0.955935	0.18845	53		0.936875	0.00397036	47
1	P35226	BMI1				Polycomb complex protein BMI-1	0.928878	6.18519e-11	4		0.944656	1.03657e-06	3
3,4	P35613	BSG	X			Basigin	0.400551	1.11679e-29	53		0.47021	3.24171e-23	47
1	Q10588	BST1				ADP-ribosyl cyclase/cyclic ADP-ribose hydrolase 2	0.867695	3.4793e-06	8		0.849664	4.14475e-08	5
1,2	P02746	C1QB				Complement C1q subcomponent subunit B	0.775073	2.65396e-09	17		0.78445	3.84782e-07	17
1,2	Q07021	C1QBP				Complement component 1 Q subcomponent-binding protein, mitochondrial	1.5799	2.75049e-13	53		1.53634	3.13574e-13	47
1,2	P06681	C2				Complement C2	0.448225	9.60703e-37	33		0.436066	4.03169e-32	27
1,2	P01024	C3	X			Complement C3	0.260893	2.90705e-42	53		0.310552	8.28134e-30	47
1,2	P0C0L5	C4A/C4B				Complement C4-B	0.349975	4.85603e-33	35		0.367897	2.30798e-31	32
1,2	P04003	C4BPA				C4b-binding protein alpha chain	0.6683	4.20768e-09	13		0.680986	1.02115e-08	12
1,2	P01031	C5				Complement C5	0.321178	7.18563e-25	53		0.352399	3.85365e-29	47
1,2	P13671	C6				Complement component C6	0.413917	3.13129e-22	40		0.401393	4.34405e-25	32
1,2	P10643	C7				Complement component C7	0.376311	1.71728e-25	19		0.385072	8.49328e-30	13
1,2	P07357	C8A				Complement component C8 alpha chain	0.417357	1.57548e-28	19		0.423242	3.47927e-31	15
1,2	P07358	C8B				Complement component C8 beta chain	0.376481	3.53088e-32	34		0.391714	6.94037e-30	33
1,2	P07360	C8G				Complement component C8 gamma chain	0.758056	2.31973e-06	8		0.769929	1.17802e-06	5
1,2	P02748	C9				Complement component C9	0.316593	1.15485e-24	53		0.308246	1.31284e-26	47
2	P05937	CALB1				Calbindin	0.452198	2.93984e-15	6		0.482938	1.69911e-10	8
2	P22676	CALB2				Calretinin	0.168364	7.88877e-40	17		0.175294	1.59203e-27	17
1,2	P0DP23	CALM1				Calmodulin-1	1.28615	0.0094465	53		1.31468	0.0132679	47
2,3,4	P27797	CALR	X			Calreticulin	1.12458	0.000825931	53		1.00033	0.992109	47
1,2	Q13557	CAMK2D				Calcium/calmodulin-dependent protein kinase type II subunit delta	0.708776	2.05366e-14	53		0.684361	8.04128e-12	47
2	Q13555	CAMK2G				Calcium/calmodulin-dependent protein kinase type II subunit gamma	0.560415	2.5386e-26	26		0.607948	1.7337e-15	21
2,3,4	P27824	CANX	X			Calnexin	1.14558	0.000255971	53		0.954302	0.121139	47
3,4	P40121	CAPG				Macrophage-capping protein	1.27397	0.000938592	53		0.989376	0.911493	47
2	P17655	CAPN2				Calpain-2 catalytic subunit	0.939556	0.0467606	53		0.887267	8.71861e-06	47
1,2	P29466	CASP1				Caspase-1	0.951301	0.00386741	3		0.927486	6.89072e-07	4
2	P55212	CASP6				Caspase-6	0.927751	6.70681e-12	3		0.932919	5.64871e-08	3
2	P04040	CAT				Catalase	0.567645	1.82265e-13	53		0.548423	3.75217e-21	47
2	Q03135	CAV1				Caveolin-1	1.07333	0.0631971	21		1.1161	0.0190153	19
2,4	Q6NZI2	CAVIN1	X			Caveolae-associated protein 1	0.59918	1.25601e-15	53		0.809476	0.00397036	47
1	Q5T0F9	CC2D1B				Coiled-coil and C2 domain-containing protein 1B	0.906954	2.25049e-07	3		0.895822	2.55313e-06	4
1,2,4	P08571	CD14			X	Monocyte differentiation antigen CD14	0.780669	3.12155e-06	53		0.650139	3.42181e-10	47
1	Q86VB7	CD163			X	Scavenger receptor cysteine-rich type 1 protein M130	0.785482	1.08955e-07	13		0.774763	1.78869e-07	14
1,2	Q9NNX6	CD209			X	CD209 antigen	1.30479	8.39761e-06	10		0.892326	0.0328897	10
2	Q9Y5K6	CD2AP				CD2-associated protein	1.14541	0.000230123	30		1.14001	0.0201094	22
1,2	P16070	CD44				CD44 antigen	1.22776	4.58936e-06	53		1.18449	0.000783024	47
1	Q08722	CD47				Leukocyte surface antigen CD47	0.835009	5.47832e-05	32		0.851953	0.000421485	32
1,2	P13987	CD59				CD59 glycoprotein	0.978147	0.608379	53		1.01605	0.778665	47
1	P08962	CD63				CD63 antigen	1.1336	0.0526669	52		1.05656	0.446671	47
1,2	P04233	CD74			X	HLA class II histocompatibility antigen gamma chain	1.37757	7.85987e-05	28		0.87818	0.0326191	26
1,2,3,4	P60033	CD81	X			CD81 antigen	0.99311	0.859395	53		1.24863	0.000674447	47
1	P21926	CD9			X	CD9 antigen	0.604591	1.59935e-11	8		0.6488	7.90723e-09	4
1,2	P60953	CDC42				Cell division control protein 42 homolog	1.24296	1.15305e-08	53		1.25228	1.04366e-10	47
1,2,4	P12830	CDH1		X		Cadherin-1	1.37866	8.1673e-09	53		1.16775	0.00436228	47
2	P24941	CDK2				Cyclin-dependent kinase 2	1.42099	2.65075e-07	53		1.50716	3.86554e-07	47
1,2	P00751	CFB	X			Complement factor B	0.36858	1.92292e-41	53		0.421787	1.93281e-25	47
2	P08603	CFH				Complement factor H	0.341506	1.20785e-27	53		0.352954	2.06156e-27	47
1,2	P05156	CFI				Complement factor I	0.283785	7.49083e-32	52		0.292692	3.24694e-30	46
2	P23528	CFL1				Cofilin-1	1.32454	5.79415e-17	53		1.39756	1.24962e-17	47
2	Q9Y281	CFL2				Cofilin-2	0.749784	6.27948e-17	21		0.897619	0.000261232	27
2	Q14839	CHD4				Chromodomain-helicase-DNA-binding protein 4	1.09119	0.000381066	53		1.09881	0.000120175	47
1	Q13231	CHIT1				Chitotriosidase-1	0.942308	0.0102312	3		0.915398	0.0060938	4
2	Q99653	CHP1				Calcineurin B homologous protein 1	1.09892	0.0205937	50		1.08955	0.0103134	43
1,2	O15111	CHUK				Inhibitor of nuclear factor kappa-B kinase subunit alpha	0.860695	7.86543e-12	7		0.858721	9.3515e-11	7
2	P09496	CLTA				Clathrin light chain A	0.937658	0.0593041	43		0.928728	0.0220058	38
2	P09497	CLTB				Clathrin light chain B	0.740186	1.5339e-12	31		0.722732	2.00296e-12	21
2	Q00610	CLTC				Clathrin heavy chain 1	0.849162	1.54837e-12	53		0.822946	1.75161e-12	47
1,2	P10909	CLU				Clusterin	0.152574	1.71246e-35	53		0.151679	3.66367e-34	47
1	P83436	COG7				Conserved oligomeric Golgi complex subunit 7	0.932225	0.00335386	24		0.92638	0.00332354	15
2,3,4	P39060	COL18A1	X			Collagen alpha-1(XVIII) chain	0.637461	1.35436e-11	53		0.454811	3.42838e-22	47
2	P02452	COL1A1				Collagen alpha-1(I) chain	0.925001	0.065001	3		0.877887	6.99725e-05	4
2	P53621	COPA	X			Coatomer subunit alpha	1.05461	0.00545834	53		0.945004	0.00960204	47
2,3,4	P53618	COPB1	X			Coatomer subunit beta	1.1153	3.11041e-08	53		0.99045	0.601749	47
2	P35606	COPB2				Coatomer subunit beta~	1.07351	0.000368124	53		0.96874	0.127734	47
2	O14579	COPE				Coatomer subunit epsilon	1.18721	2.58118e-08	53		1.13221	2.34509e-05	47
2	Q9Y678	COPG1				Coatomer subunit gamma-1	1.06474	0.0155546	53		0.961101	0.0960527	47
2	Q9UBF2	COPG2				Coatomer subunit gamma-2	0.806057	1.41936e-10	53		0.774012	1.35513e-09	47
2	P61923	COPZ1				Coatomer subunit zeta-1	1.09488	0.0259608	53		1.0002	0.996932	47
3,4	P31146	CORO1A	X			Coronin-1A	1.24863	0.00225584	53		0.874858	0.0418163	47
3,4	Q14019	COTL1	X			Coactosin-like protein	0.457239	7.29438e-20	53		0.357496	2.29668e-21	47
3,4	O75131	CPNE3	X			Copine-3	1.1465	8.07254e-08	53		1.02376	0.45415	47
3	Q9H3G5	CPVL	X			Probable serine carboxypeptidase CPVL	1.24983	0.000300833	53		0.841087	0.0216014	47
2	P46108	CRK				Adapter molecule crk	1.01587	0.698264	50		1.06229	0.11483	44
2	P46109	CRKL				Crk-like protein	0.851681	0.000116043	47		0.909014	0.0123535	40
2	P41240	CSK				Tyrosine-protein kinase CSK	1.14493	5.55338e-05	49		1.1604	2.4386e-06	45
2	P48729	CSNK1A1	X			Casein kinase I isoform alpha	1.14397	2.52141e-06	53		1.02013	0.421139	47
2	P68400	CSNK2A1				Casein kinase II subunit alpha	0.955659	0.130686	39		0.9673	0.370354	35
2	P19784	CSNK2A2				Casein kinase II subunit alpha~	0.862566	1.11513e-07	39		0.90086	0.000554973	35
2	P67870	CSNK2B				Casein kinase II subunit beta	0.995271	0.863403	46		1.02785	0.413491	40
2	P04080	CSTB				Cystatin-B	1.22566	7.71242e-07	53		1.12764	0.00336343	47
2	P35221	CTNNA1				Catenin alpha-1	1.07159	0.027073	53		0.966804	0.398877	47
2	P26232	CTNNA2				Catenin alpha-2	0.780426	1.3207e-12	8		0.817341	1.41449e-06	11
2	P35222	CTNNB1				Catenin beta-1	0.965217	0.363202	53		0.902944	0.0143906	47
2	O60716	CTNND1				Catenin delta-1	0.994751	0.828967	53		0.942292	0.0255032	47
2,3,4	P10619	CTSA	X			Lysosomal protective protein	1.12549	0.00763433	53		0.945535	0.116241	47
2,3,4	P07858	CTSB	X			Cathepsin B	1.31852	1.23278e-05	53		1.02865	0.64136	47
2,3,4	P53634	CTSC	X			Dipeptidyl peptidase 1	1.39655	1.37823e-10	53		1.07305	0.287059	47
2,3,4	P07339	CTSD				Cathepsin D	0.611969	1.68074e-11	53		0.511321	4.54161e-14	47
1,2	P07711	CTSL				Cathepsin L1	1.28585	0.000114639	19		1.11374	0.0181245	15
2	Q9UBR2	CTSZ				Cathepsin Z	1.76203	6.69646e-12	53		1.53615	4.03073e-07	47
2	Q14247	CTTN				Src substrate cortactin	1.09868	0.00830191	34		1.11705	0.0129269	32
1,2	Q13616	CUL1			X	Cullin-1	0.823545	6.95515e-11	53		0.91174	0.00099676	47
1	Q13617	CUL2				Cullin-2	1.04247	0.100836	53		1.10436	5.01541e-05	47
1,2	P04839	CYBB				Cytochrome b-245 heavy chain	1.10796	0.0270024	26		0.922834	0.0759551	20
2,4	P99999	CYCS	X			Cytochrome c	0.886861	0.0353579	53		1.10253	0.109245	47
3,4	Q9NUQ9	CYRIB	X			CYFIP-related Rac1 interactor B	1.1732	0.00033931	53		0.904916	0.0132552	47
2	P98082	DAB2				Disabled homolog 2	0.732439	3.16726e-11	12		0.7655	4.21287e-08	7
1	P07585	DCN			X	Decorin	0.322093	3.37393e-24	30		0.327344	2.1736e-20	23
2	Q9UJW0	DCTN4				Dynactin subunit 4	0.820986	6.97147e-09	32		0.855172	6.90345e-07	26
3	Q8IY21	DDX60				Probable ATP-dependent RNA helicase DDX60	1.14024	0.0205516	47		0.941188	0.202987	39
2	O00273	DFFA				DNA fragmentation factor subunit alpha	0.99921	0.982368	42		1.10028	0.028369	39
1	O60231	DHX16				Pre-mRNA-splicing factor ATP-dependent RNA helicase DHX16	0.938009	6.62037e-09	4		0.941728	6.50047e-07	3
1	Q9NR28	DIABLO				Diablo homolog, mitochondrial	1.10454	0.000613572	53		1.14482	6.74723e-06	47
1	P09622	DLD			X	Dihydrolipoyl dehydrogenase, mitochondrial	1.1713	4.6541e-07	53		1.09383	0.00166867	47
3,4	O75165	DNAJC13	X			DnaJ homolog subfamily C member 13	1.25036	1.58965e-07	53		1.06893	0.0143906	47
2	Q13217	DNAJC3				DnaJ homolog subfamily C member 3	0.990618	0.856178	44		0.779519	6.15836e-07	35
2	Q05193	DNM1				Dynamin-1	0.908176	8.69743e-08	3		0.915907	0.0024804	4
1,2	O00429	DNM1L				Dynamin-1-like protein	0.988534	0.676096	53		0.963373	0.222671	47
2,3,4	P50570	DNM2	X			Dynamin-2	1.08557	0.00191431	53		0.924089	0.00212052	47
2	Q9UQ16	DNM3				Dynamin-3	0.927962	5.5932e-13	3		0.918578	3.71456e-07	3
2	Q14185	DOCK1				Dedicator of cytokinesis protein 1	0.891567	0.00012181	38		0.871213	3.78357e-05	35
1	P27487	DPP4				Dipeptidyl peptidase 4	0.936691	3.22401e-09	3		0.923727	0.00819066	4
2	Q9UHL4	DPP7				Dipeptidyl peptidase 2	1.37337	1.18044e-08	53		1.15013	0.00782209	47
1	Q14919	DRAP1			X	Dr1-associated corepressor	1.0052	0.901288	35		1.08347	0.0445816	22
2	Q6XUX3	DSTYK				Dual serine/threonine and tyrosine protein kinase	1.10098	0.0144261	19		1.07286	0.0499857	15
2	Q14204	DYNC1H1				Cytoplasmic dynein 1 heavy chain 1	1.03184	0.198788	53		1.05924	0.00944169	47
2	Q13409	DYNC1I2				Cytoplasmic dynein 1 intermediate chain 2	1.2122	2.1537e-06	46		1.25686	1.14732e-07	40
2	Q9Y6G9	DYNC1LI1				Cytoplasmic dynein 1 light intermediate chain 1	0.797524	2.60048e-13	24		0.905763	0.00161896	24
2	O43237	DYNC1LI2				Cytoplasmic dynein 1 light intermediate chain 2	1.21173	1.44701e-05	53		1.15542	0.000293637	47
2	P63167	DYNLL1				Dynein light chain 1, cytoplasmic	1.53857	3.94224e-23	34		1.44372	6.27458e-15	34
2	Q9NP97	DYNLRB1				Dynein light chain roadblock-type 1	1.05925	0.0572205	53		1.07324	0.00746	47
2	P63172	DYNLT1				Dynein light chain Tctex-type 1	0.927282	4.74453e-14	3		0.932105	3.3903e-11	4
1	P30084	ECHS1				Enoyl-CoA hydratase, mitochondrial	1.18072	0.00133732	53		1.124	0.013494	47
1,2	Q9BQ95	ECSIT				Evolutionarily conserved signaling intermediate in Toll pathway, mitochondrial	0.943032	8.13342e-08	5		0.931071	2.12929e-16	1
2	Q15075	EEA1				Early endosome antigen 1	0.826823	2.16175e-09	53		0.884431	3.26575e-05	47
2	P68104	EEF1A1				Elongation factor 1-alpha 1	1.48547	1.04022e-19	53		1.45096	2.18491e-13	47
1	Q08426	EHHADH				Peroxisomal bifunctional enzyme	0.440643	5.32009e-31	44		0.509217	1.26991e-18	36
2	P19525	EIF2AK2				Interferon-induced, double-stranded RNA-activated protein kinase	1.2624	7.58197e-09	40		1.16467	0.00569506	33
1	Q9UI10	EIF2B4				Translation initiation factor eIF-2B subunit delta	1.08507	2.06621e-05	7		1.13026	4.59488e-07	7
2	P05198	EIF2S1				Eukaryotic translation initiation factor 2 subunit 1	1.13529	6.05021e-08	53		1.17317	8.05029e-08	47
3,4	Q14240	EIF4A2	X			Eukaryotic initiation factor 4A-II	0.711936	2.75291e-14	53		1.02086	0.625507	47
1	P23588	EIF4B				Eukaryotic translation initiation factor 4B	1.28391	6.17039e-07	53		1.2043	0.000382622	47
1,2	P08246	ELANE				Neutrophil elastase	0.934537	0.0140602	5		0.926345	1.09443e-12	1
2	Q92556	ELMO1				Engulfment and cell motility protein 1	0.944823	1.67548e-06	3		0.917309	3.89895e-10	4
2	Q96JJ3	ELMO2				Engulfment and cell motility protein 2	1.0811	0.0415392	44		1.0357	0.325982	35
2	O95163	ELP1				Elongator complex protein 1	0.899118	2.76315e-08	13		0.936165	7.95413e-05	7
1	P49961	ENTPD1			X	Ectonucleoside triphosphate diphosphohydrolase 1	0.789962	1.47962e-07	14		0.841539	1.9559e-07	12
2	P42566	EPS15				Epidermal growth factor receptor substrate 15	1.05476	0.0196635	29		1.06883	0.0199388	24
2	P11678	EPX				Eosinophil peroxidase	0.900416	0.000173898	4		0.920764	0.0165375	3
3,4	Q9NZ08	ERAP1	X			Endoplasmic reticulum aminopeptidase 1	1.14229	0.00601133	53		0.946635	0.194538	47
1	P19447	ERCC3				General transcription and DNA repair factor IIH helicase subunit XPB	0.885896	4.36168e-06	11		0.888018	2.24654e-06	10
3,4	Q9BS26	ERP44	X			Endoplasmic reticulum resident protein 44	1.29246	6.49147e-12	53		1.10314	0.000129576	47
4	A0FGR8	ESYT2	X			Extended synaptotagmin-2	1.19959	7.11711e-07	53		0.986134	0.691254	47
1	Q01844	EWSR1				RNA-binding protein EWS	1.06667	0.0262569	14		1.09297	0.0130828	13
2	P15311	EZR				Ezrin	0.651165	2.54426e-13	53		0.598981	2.82269e-13	47
2	Q9Y624	F11R				Junctional adhesion molecule A	1.12702	0.00981852	47		1.16938	0.00014552	40
1,2	P00748	F12				Coagulation factor XII	0.825699	0.0021549	4		0.860655	0.00272664	3
1	P00488	F13A1				Coagulation factor XIII A chain	0.618263	7.76242e-11	53		0.773563	0.000260846	47
2	P00734	F2				Prothrombin	0.339231	7.06081e-28	53		0.353571	3.03806e-27	47
1	P15090	FABP4				Fatty acid-binding protein, adipocyte	0.624664	1.50809e-10	18		0.755162	0.000306449	15
3,4	Q01469	FABP5	X			Fatty acid-binding protein 5	0.943261	0.291273	50		0.696303	4.11064e-07	43
1,2	Q13158	FADD				FAS-associated death domain protein	0.9477	9.32014e-05	3		0.954534	0.00657365	4
1	A6NHQ2	FBLL1				rRNA/tRNA 2~-O-methyltransferase fibrillarin-like protein 1	1.24823	4.59341e-08	50		1.23259	2.72723e-07	43
2	P09467	FBP1				Fructose-1,6-bisphosphatase 1	0.859912	0.00628963	22		0.829182	0.00531063	18
3,4	Q86UX7	FERMT3	X			Fermitin family homolog 3	1.26121	4.92546e-07	53		0.888846	0.025277	47
1	P02671	FGA				Fibrinogen alpha chain	0.548808	1.17577e-08	53		0.455278	2.7517e-18	47
2	P21333	FLNA				Filamin-A	0.861432	3.66492e-06	53		0.786841	4.24023e-07	47
2	O75369	FLNB				Filamin-B	0.504444	4.54829e-15	53		0.528892	9.77911e-11	47
2	Q14315	FLNC				Filamin-C	1.29597	3.72831e-07	28		1.37337	2.74008e-05	25
2	O75955	FLOT1				Flotillin-1	0.901411	6.05228e-05	53		0.952876	0.108347	47
2	Q14254	FLOT2				Flotillin-2	0.996469	0.887974	53		1.00469	0.877264	47
1,2	P02751	FN1				Fibronectin	0.813332	0.00430846	53		0.688333	1.95281e-11	47
2	Q96RU3	FNBP1				Formin-binding protein 1	0.91623	0.0612344	36		0.859747	0.00270455	30
2	Q16658	FSCN1				Fascin	0.886587	0.00228529	53		0.898485	0.0216182	47
3,4	P51114	FXR1	X			Fragile X mental retardation syndrome-related protein 1	0.857286	1.57023e-05	45		1.00202	0.961238	42
1,2	P06241	FYN		X		Tyrosine-protein kinase Fyn	0.993623	0.870779	3		1.01219	0.798077	4
1	P11413	G6PD				Glucose-6-phosphate 1-dehydrogenase	0.911673	0.0290085	53		0.88518	0.000343187	47
2	O14976	GAK				Cyclin-G-associated kinase	1.04923	0.108782	47		1.06411	0.0764164	40
1	O14556	GAPDHS				Glyceraldehyde-3-phosphate dehydrogenase, testis-specific	1.57506	9.51355e-13	53		1.47306	2.58943e-12	47
1	P32456	GBP2				Guanylate-binding protein 2	0.952832	0.328501	12		0.771469	2.10916e-06	8
1	P32189	GK				Glycerol kinase	0.964984	0.145179	4		0.927486	4.03213e-06	3
2,3,4	Q92896	GLG1	X			Golgi apparatus protein 1	1.15695	0.00115681	53		0.941118	0.110821	47
3,4	Q04760	GLO1	X			Lactoylglutathione lyase	0.810337	7.76586e-06	53		1.02516	0.602383	47
1,2	O94925	GLS				Glutaminase kidney isoform, mitochondrial	0.778642	9.60106e-09	44		0.844032	0.00151212	36
1	P00367	GLUD1				Glutamate dehydrogenase 1, mitochondrial	0.877553	8.12076e-07	53		0.827275	5.37314e-08	47
2	P15104	GLUL				Glutamine synthetase	0.137392	1.77196e-48	8		0.13792	3.50877e-36	5
3,4	P17900	GM2A	X			Ganglioside GM2 activator	1.30499	1.08187e-05	53		1.02383	0.676756	47
2,4	P29992	GNA11	X			Guanine nucleotide-binding protein subunit alpha-11	0.745076	1.1338e-16	53		0.945055	0.147535	47
2,3,4	Q14344	GNA13	X			Guanine nucleotide-binding protein subunit alpha-13	0.686354	2.51474e-21	53		0.813046	3.50914e-08	47
2	P63096	GNAI1				Guanine nucleotide-binding protein G(i) subunit alpha-1	0.784438	2.44658e-05	19		0.977615	0.658805	22
2	P04899	GNAI2				Guanine nucleotide-binding protein G(i) subunit alpha-2	0.716221	7.24287e-13	53		0.771783	8.45557e-11	47
2,3,4	P08754	GNAI3	X			Guanine nucleotide-binding protein G(i) subunit alpha	1.13514	5.91143e-08	40		1.29783	2.08187e-10	42
2	P09471	GNAO1				Guanine nucleotide-binding protein G(o) subunit alpha	0.319076	1.35872e-38	16		0.370174	6.53745e-20	19
2	P50148	GNAQ				Guanine nucleotide-binding protein G(q) subunit alpha	0.855135	0.000235419	26		0.85307	0.000109959	20
2,3,4	P63092	GNAS	X			Guanine nucleotide-binding protein G(s) subunit alpha isoforms short	0.938775	0.0163787	53		1.15367	8.37417e-05	47
2	P11488	GNAT1				Guanine nucleotide-binding protein G(t) subunit alpha-1	0.103468	1.43762e-50	44		0.097438	7.55892e-38	36
2	P62873	GNB1				Guanine nucleotide-binding protein G(I)/G(S)/G(T) subunit beta-1	0.342386	1.59548e-31	53		0.397653	4.84657e-20	47
2	P62879	GNB2				Guanine nucleotide-binding protein G(I)/G(S)/G(T) subunit beta-2	0.722777	1.22286e-12	53		0.78819	0.00013655	47
2	P16520	GNB3				Guanine nucleotide-binding protein G(I)/G(S)/G(T) subunit beta-3	0.553049	4.68228e-08	7		0.596486	4.27006e-05	6
2	Q9HAV0	GNB4				Guanine nucleotide-binding protein subunit beta-4	1.06842	0.0853625	45		1.09748	0.0325809	42
1,2,4	Q9UBI6	GNG12	X			Guanine nucleotide-binding protein G(I)/G(S)/G(O) subunit gamma-12	0.763111	2.79643e-06	45		1.05716	0.396867	40
2	O60262	GNG7				Guanine nucleotide-binding protein G(I)/G(S)/G(O) subunit gamma-7	0.657916	2.09062e-12	27		0.816631	2.50253e-05	25
3,4	P15586	GNS	X			N-acetylglucosamine-6-sulfatase	1.37622	9.5761e-13	53		1.02747	0.625344	47
2	O14653	GOSR2				Golgi SNAP receptor complex member 2	0.869326	0.000122046	11		0.848202	7.02687e-07	9
1	P00505	GOT2	X			Aspartate aminotransferase, mitochondrial	0.491709	4.63696e-22	53		0.615791	5.29778e-15	47
1,2	P06744	GPI				Glucose-6-phosphate isomerase	1.0798	0.0107236	53		1.11246	0.00103293	47
2	P80108	GPLD1				Phosphatidylinositol-glycan-specific phospholipase D	0.753573	2.85543e-10	7		0.704191	9.62024e-14	7
3,4	Q14956	GPNMB				Transmembrane glycoprotein NMB	1.06955	0.493041	53		0.772478	0.0332261	47
1,2	P62993	GRB2				Growth factor receptor-bound protein 2	0.961676	0.317032	49		0.905902	0.0185069	43
2	Q7Z429	GRINA				Protein lifeguard 1	1.33602	8.69432e-06	8		1.1049	0.0806532	5
2	P49840	GSK3A				Glycogen synthase kinase-3 alpha	0.917993	3.20695e-12	4		0.921176	4.26893e-12	3
3,4	P09211	GSTP1	X			Glutathione S-transferase P	1.02836	0.706392	53		1.52891	1.03215e-05	47
1	Q12789	GTF3C1				General transcription factor 3C polypeptide 1	0.535839	1.82236e-13	36		0.624149	1.25493e-13	31
1,3,4	P08236	GUSB	X			Beta-glucuronidase	1.29762	1.55942e-05	53		0.925487	0.161906	47
3,4	P46976	GYG1	X			Glycogenin-1	0.642789	3.04544e-21	53		0.821923	1.3667e-05	47
2	P07305	H1-0				Histone H1.0	0.94348	0.32113	53		1.16536	0.193275	47
2	Q92522	H1-10				Histone H1.10	0.519303	2.23307e-23	29		0.592026	4.26e-10	33
2	P16403	H1-2				Histone H1.2	1.05546	0.0290602	6		1.12049	0.0546965	5
2	P10412	H1-4				Histone H1.4	0.848243	0.0318019	52		1.01913	0.886413	47
2	P16401	H1-5				Histone H1.5	1.67163	4.66479e-10	53		1.5912	2.38432e-08	47
1	P55084	HADHB				Trifunctional enzyme subunit beta, mitochondrial	1.22599	2.05547e-10	53		1.16694	1.73466e-06	47
1,2	P08631	HCK				Tyrosine-protein kinase HCK	1.62841	3.86515e-16	20		1.40035	3.35974e-07	20
2	Q13547	HDAC1				Histone deacetylase 1	0.775478	5.56274e-05	25		0.788002	0.000143332	20
3,4	P07686	HEXB	X			Beta-hexosaminidase subunit beta	2.24864	2.30992e-17	53		1.41497	1.77412e-05	47
2	O14964	HGS				Hepatocyte growth factor-regulated tyrosine kinase substrate	0.840324	6.88229e-06	53		0.906426	0.00404424	46
2	O00291	HIP1				Huntingtin-interacting protein 1	0.878318	0.00272502	26		0.886469	0.0408892	20
2	O75146	HIP1R				Huntingtin-interacting protein 1-related protein	1.0241	0.277996	13		1.13164	1.89628e-05	15
2	P19367	HK1				Hexokinase-1	0.699081	2.23075e-19	53		0.636327	1.4197e-15	47
2	P52789	HK2				Hexokinase-2	0.927906	1.09612e-06	2		0.903565	6.22234e-05	2
2	P52790	HK3				Hexokinase-3	1.09032	0.168877	28		0.854157	0.00630818	18
1,2,4	P04439	HLA-A	X		X	HLA class I histocompatibility antigen, A alpha chain	1.87366	9.97586e-12	53		1.03058	0.625344	47
1,2	P01889	HLA-B				HLA class I histocompatibility antigen, B alpha chain	0.924157	0.417838	28		0.644103	1.01187e-06	25
1,2,4	P10321	HLA-C	X			HLA class I histocompatibility antigen, C alpha chain	1.52767	5.94194e-08	52		0.940575	0.277786	46
1,2	P28068	HLA-DMB				HLA class II histocompatibility antigen, DM beta chain	1.17423	3.57808e-05	7		0.99638	0.906032	7
1,2	P20036	HLA-DPA1		X		HLA class II histocompatibility antigen, DP alpha 1 chain	1.36614	5.42703e-05	38		0.833159	0.0293315	32
1,2	P04440	HLA-DPB1		X		HLA class II histocompatibility antigen, DP beta 1 chain	1.0466	0.419484	30		0.887302	0.0976599	22
1,2	P01920	HLA-DQB1		X		HLA class II histocompatibility antigen, DQ beta 1 chain	0.867957	0.00375476	18		0.787819	5.73464e-09	15
1,2,4	P01903	HLA-DRA	X		X	HLA class II histocompatibility antigen, DR alpha chain	1.4946	1.21275e-06	53		0.865259	0.0851506	47
1,2	P01911	HLA-DRB1				HLA class II histocompatibility antigen, DRB1 beta chain	0.816866	0.0538396	35		0.601204	5.62958e-07	31
1,2	P79483	HLA-DRB3				HLA class II histocompatibility antigen, DR beta 3 chain	0.950102	0.0205476	3		0.91737	3.6453e-10	3
2	Q30154	HLA-DRB5				HLA class II histocompatibility antigen, DR beta 5 chain	1.14718	0.00751963	22		0.909694	0.020823	18
1,2	P17693	HLA-G				HLA class I histocompatibility antigen, alpha chain G	0.9802	0.524598	3		0.921456	4.84737e-09	4
3	Q8TCT9	HM13	X			Minor histocompatibility antigen H13	1.38472	4.30418e-10	53		0.94871	0.28948	47
2	P17096	HMGA1				High mobility group protein HMG-I/HMG-Y	1.39594	0.00239712	53		1.37814	0.0269797	47
1,2	P09429	HMGB1		X		High mobility group protein B1	1.02105	0.705443	53		1.16285	0.00491669	47
2	P26583	HMGB2				High mobility group protein B2	0.878278	6.68837e-05	4		0.906865	3.39078e-05	3
1	P00492	HPRT1				Hypoxanthine-guanine phosphoribosyltransferase	0.398679	5.20537e-31	53		0.378759	6.19439e-20	47
2	P07900	HSP90AA1				Heat shock protein HSP 90-alpha	1.24198	7.62348e-13	53		1.32143	3.70298e-20	47
2	P08238	HSP90AB1				Heat shock protein HSP 90-beta	1.2561	4.58172e-11	53		1.30412	2.15812e-11	47
2	P14625	HSP90B1	X			Endoplasmin	1.07531	0.00564187	53		0.956703	0.0555853	47
2	Q0VDF9	HSPA14				Heat shock 70 kDa protein 14	1.32489	9.55096e-13	34		1.14245	0.000221701	26
2,3,4	P0DMV8	HSPA1A/HSPA1B	X			Heat shock 70 kDa protein 1A	0.880362	0.00033382	53		1.11255	0.0442037	47
2	P54652	HSPA2				Heat shock-related 70 kDa protein 2	1.35228	1.6498e-07	53		1.555	8.22373e-09	47
2	P34932	HSPA4				Heat shock 70 kDa protein 4	1.07179	0.00933622	53		1.11083	2.52333e-05	47
2,3,4	P11021	HSPA5	X			Endoplasmic reticulum chaperone BiP	1.24913	3.64569e-14	53		1.11296	0.000109923	47
2	P11142	HSPA8				Heat shock cognate 71 kDa protein	1.3221	4.22016e-17	53		1.2067	2.3321e-13	47
2	P38646	HSPA9				Stress-70 protein, mitochondrial	1.27408	1.999e-10	53		1.23703	2.48562e-11	47
2,3,4	P04792	HSPB1	X			Heat shock protein beta-1	1.06631	0.0611119	53		1.46872	2.619e-10	47
2	Q16082	HSPB2				Heat shock protein beta-2	0.911129	1.98922e-09	4		0.904835	1.52927e-06	3
2,3,4	P42858	HTT	X			Huntingtin	1.24125	8.73941e-10	53		1.04912	0.134968	47
1,2,3,4	P05362	ICAM1			X	Intercellular adhesion molecule 1	0.75329	1.95422e-11	53		0.660074	5.87939e-13	47
2	P14735	IDE				Insulin-degrading enzyme	0.935608	0.0447861	44		0.822868	1.33567e-06	35
1,4	Q16666	IFI16	X			Gamma-interferon-inducible protein 16	1.41419	5.47299e-06	53		1.06196	0.47707	47
1,2	P80217	IFI35				Interferon-induced 35 kDa protein	0.940736	2.63018e-06	4		0.942788	8.60494e-05	3
1,2	P09914	IFIT1				Interferon-induced protein with tetratricopeptide repeats 1	0.889597	0.0340992	19		0.834091	0.000876588	14
1,2	O14879	IFIT3				Interferon-induced protein with tetratricopeptide repeats 3	0.928659	6.43723e-10	4		0.938839	0.00373738	3
1,2	P08069	IGF1R				Insulin-like growth factor 1 receptor	0.807678	1.01273e-07	30		0.819511	5.8907e-05	22
1,2	P11717	IGF2R				Cation-independent mannose-6-phosphate receptor	1.02064	0.636598	53		0.995791	0.935884	47
1,2	P01876	IGHA1				Immunoglobulin heavy constant alpha 1	0.196137	2.71986e-32	53		0.2105	2.33482e-28	47
1,2	P01859	IGHG2				Immunoglobulin heavy constant gamma 2	0.180928	1.62535e-31	53		0.177665	9.0337e-30	47
1,2	P01860	IGHG3				Immunoglobulin heavy constant gamma 3	0.232121	1.04374e-34	53		0.241386	1.25909e-25	47
1,2	P01861	IGHG4				Immunoglobulin heavy constant gamma 4	0.139287	2.11578e-31	44		0.1296	3.11401e-26	43
1,2	P01871	IGHM				Immunoglobulin heavy constant mu	0.543006	5.4166e-18	25		0.436163	1.3522e-15	20
2	B9A064	IGLL1/IGLL5				Immunoglobulin lambda-like polypeptide 5	0.195506	6.36268e-34	47		0.201682	4.17686e-33	39
1,2	O14920	IKBKB				Inhibitor of nuclear factor kappa-B kinase subunit beta	0.931296	1.98668e-09	3		0.943909	2.05997e-06	4
1	Q12906	ILF3				Interleukin enhancer-binding factor 3	1.19067	1.55269e-10	53		1.19395	6.7325e-12	47
2	Q9BT40	INPP5K				Inositol polyphosphate 5-phosphatase K	0.190132	8.17868e-40	53		0.179821	4.0788e-32	47
1,2	O15357	INPPL1				Phosphatidylinositol 3,4,5-trisphosphate 5-phosphatase 2	0.82806	3.6125e-05	20		0.782531	3.34389e-06	13
2,3,4	P46940	IQGAP1	X			Ras GTPase-activating-like protein IQGAP1	1.3601	2.67338e-12	53		1.1278	0.004252	47
1,2	Q14653	IRF3				Interferon regulatory factor 3	1.06117	0.000195209	6		1.01573	0.412703	8
1,2	P05161	ISG15				Ubiquitin-like protein ISG15	1.34779	8.75034e-06	34		1.0698	0.289684	28
1	Q96J02	ITCH			X	E3 ubiquitin-protein ligase Itchy homolog	0.909265	0.00018932	24		0.872353	4.24759e-08	23
1,2	P56199	ITGA1				Integrin alpha-1	0.614594	3.74615e-17	8		0.758786	2.94251e-05	4
2	P26006	ITGA3				Integrin alpha-3	0.960811	0.430745	53		1.03635	0.626571	47
1,2	P23229	ITGA6				Integrin alpha-6	0.699501	7.35904e-06	7		0.632968	2.39727e-07	7
1,2	P11215	ITGAM				Integrin alpha-M	0.854866	0.0203897	27		0.850646	0.00174714	19
1,2	P06756	ITGAV				Integrin alpha-V	0.447535	6.0249e-31	53		0.447704	4.33257e-27	47
1,2	P20702	ITGAX				Integrin alpha-X	1.14714	0.00218756	11		1.13875	0.00970278	9
1,2	P05556	ITGB1				Integrin beta-1	0.820477	2.13483e-07	53		0.864335	0.00281024	47
1,2,4	P05107	ITGB2	X			Integrin beta-2	1.25575	0.00117987	43		0.89968	0.171389	37
1,2	P16144	ITGB4				Integrin beta-4	0.889157	9.57061e-05	3		0.847653	0.00103942	4
2	P18084	ITGB5				Integrin beta-5	0.852937	5.28163e-11	9		0.887642	1.65709e-07	11
1,2	P26012	ITGB8				Integrin beta-8	0.883507	0.00018691	3		0.870453	0.000178212	4
1,2	Q14571	ITPR2				Inositol 1,4,5-trisphosphate receptor type 2	0.845593	1.80977e-05	20		0.802179	7.79044e-09	12
2	Q14573	ITPR3				Inositol 1,4,5-trisphosphate receptor type 3	0.831504	5.18183e-08	15		0.810114	1.93448e-09	12
3,4	Q9NQT8	KIF13B	X			Kinesin-like protein KIF13B	0.871938	1.03729e-05	44		1.06339	0.0694423	37
1,2	P10721	KIT				Mast/stem cell growth factor receptor Kit	1.29166	1.63371e-05	44		1.12831	0.00934969	35
2	P03952	KLKB1				Plasma kallikrein	0.906552	2.79396e-07	3		0.912404	7.7229e-07	3
3,4	Q9H9P8	L2HGDH	X			L-2-hydroxyglutarate dehydrogenase, mitochondrial	0.777834	3.8759e-10	44		0.924925	0.0169126	36
1,2,3,4	P11279	LAMP1				Lysosome-associated membrane glycoprotein 1	1.43757	3.97461e-11	53		1.25923	2.83076e-08	47
1,2,4	P13473	LAMP2	X			Lysosome-associated membrane glycoprotein 2	1.35112	5.2771e-07	53		0.971438	0.687977	47
1	Q9UHA4	LAMTOR3				Ragulator complex protein LAMTOR3	1.0906	0.00729673	44		1.08758	0.0171745	36
3,4	P28838	LAP3	X			Cytosol aminopeptidase	1.31375	2.30503e-05	53		0.926155	0.109245	47
2	Q14847	LASP1				LIM and SH3 domain protein 1	0.798883	9.87504e-05	53		0.889778	0.0623385	47
1,2	P18428	LBP				Lipopolysaccharide-binding protein	0.503713	6.57422e-29	28		0.493655	1.53972e-21	26
1,2	P80188	LCN2				Neutrophil gelatinase-associated lipocalin	0.914917	0.00568454	5		0.922797	2.83106e-09	1
1,3,4	P13796	LCP1	X			Plastin-2	1.02764	0.705443	53		0.749336	0.000333587	47
1	P00338	LDHA				L-lactate dehydrogenase A chain	1.19929	0.000983239	53		1.27644	4.59413e-07	47
3,4	P09382	LGALS1	X			Galectin-1	0.960345	0.416134	53		0.726251	3.6358e-06	47
1,3,4	P17931	LGALS3	X		X	Galectin-3	1.42899	5.70792e-08	52		0.922646	0.206964	47
3,4	Q08380	LGALS3BP	X			Galectin-3-binding protein	1.14419	0.0010459	53		0.882133	0.0059678	47
2	P20700	LMNB1				Lamin-B1	1.09651	0.0159887	53		1.09936	0.052023	47
2	Q03252	LMNB2				Lamin-B2	0.861796	0.000238008	53		0.944146	0.263665	47
3,4	Q8NF37	LPCAT1				Lysophosphatidylcholine acyltransferase 1	0.914621	0.00548443	50		0.823519	3.50435e-06	43
1,4	Q07954	LRP1				Prolow-density lipoprotein receptor-related protein 1	0.65897	5.24416e-17	53		0.588099	1.29035e-19	47
3,4	P09960	LTA4H	X			Leukotriene A-4 hydrolase	0.763638	1.15369e-10	53		1.0154	0.717118	47
1	P02788	LTF				Lactotransferrin	0.805675	0.00108342	8		0.766746	4.3114e-06	5
1,2	P07948	LYN		X		Tyrosine-protein kinase Lyn	0.936459	1.31867e-07	4		0.944338	6.06998e-05	3
2	P61626	LYZ				Lysozyme C	1.11936	0.11269	17		0.870138	0.0189627	8
2	P20645	M6PR				Cation-dependent mannose-6-phosphate receptor	0.625254	7.12025e-07	50		0.51958	1.28232e-10	43
1,2	Q02750	MAP2K1				Dual specificity mitogen-activated protein kinase kinase 1	0.927014	2.85327e-08	3		0.919636	8.49426e-07	4
1,2	P36507	MAP2K2				Dual specificity mitogen-activated protein kinase kinase 2	0.787581	3.48466e-07	36		0.780958	1.64286e-05	31
2	P46734	MAP2K3				Dual specificity mitogen-activated protein kinase kinase 3	1.08643	4.59136e-06	8		1.03309	0.0704322	5
1,2	P45985	MAP2K4				Dual specificity mitogen-activated protein kinase kinase 4	0.931284	1.03894e-12	4		0.92343	2.88008e-12	2
2	Q16584	MAP3K11				Mitogen-activated protein kinase kinase kinase 11	0.812851	4.78877e-11	7		0.769484	1.716e-09	6
2	O95819	MAP4K4				Mitogen-activated protein kinase kinase kinase kinase 4	1.2591	2.17004e-12	35		1.22157	3.20585e-09	39
1,2	P28482	MAPK1				Mitogen-activated protein kinase 1	0.86032	7.61052e-08	53		0.792261	7.60002e-09	47
1,2	Q16539	MAPK14				Mitogen-activated protein kinase 14	0.525386	9.41704e-10	25		0.439055	6.57646e-14	15
1,2	P27361	MAPK3				Mitogen-activated protein kinase 3	0.557795	6.87086e-22	50		0.55289	5.77386e-16	43
1,2	P45984	MAPK9				Mitogen-activated protein kinase 9	0.829509	3.30979e-08	23		0.851648	6.64892e-08	24
2	P29966	MARCKS				Myristoylated alanine-rich C-kinase substrate	0.683729	2.07049e-13	19		0.816263	0.00378075	21
1,2	Q7Z434	MAVS				Mitochondrial antiviral-signaling protein	0.932682	1.44166e-06	4		0.931798	4.21927e-15	2
1	P43121	MCAM				Cell surface glycoprotein MUC18	0.694691	8.98834e-13	53		0.759929	1.20111e-05	47
1	P33992	MCM5				DNA replication licensing factor MCM5	1.13036	0.00267357	27		1.12011	0.0101558	27
1	P33993	MCM7				DNA replication licensing factor MCM7	0.916817	0.0343748	18		0.799857	0.000249102	16
2	O60244	MED14				Mediator of RNA polymerase II transcription subunit 14	0.786135	3.32641e-10	7		0.773105	4.13902e-07	7
2	P08581	MET				Hepatocyte growth factor receptor	1.12223	0.0013405	49		0.995451	0.917483	44
2	P50579	METAP2				Methionine aminopeptidase 2	1.00886	0.780893	47		1.0613	0.0764164	39
1,2	Q08431	MFGE8				Lactadherin	0.617218	2.32692e-15	29		0.606336	8.53107e-15	23
1,2	P14174	MIF				Macrophage migration inhibitory factor	1.78483	1.40767e-06	53		2.12744	1.64085e-08	47
2	Q9BVC4	MLST8				Target of rapamycin complex subunit LST8	1.11992	0.000235872	6		1.12941	0.000754018	6
1	P08473	MME				Neprilysin	1.116	0.00716459	13		1.14848	0.0277834	14
1,2	P14780	MMP9				Matrix metalloproteinase-9	0.923295	0.0154354	4		0.915856	3.07246e-08	2
2	P05164	MPO				Myeloperoxidase	0.782281	0.000344088	16		0.687637	1.60212e-07	11
2	Q6WCQ1	MPRIP				Myosin phosphatase Rho-interacting protein	0.819871	1.7707e-07	23		0.861211	0.00108447	21
1,2	O14807	MRAS				Ras-related protein M-Ras	0.889843	7.76586e-06	4		0.897235	1.44566e-05	3
1,2	P22897	MRC1				Macrophage mannose receptor 1	0.815794	1.4394e-11	7		0.773325	2.58072e-11	7
2	Q9UBG0	MRC2				C-type mannose receptor 2	0.440674	1.68903e-24	43		0.372741	1.66011e-19	40
1	P82675	MRPS5				28S ribosomal protein S5, mitochondrial	1.23803	6.77592e-12	37		1.29308	2.66056e-12	29
2	P26038	MSN				Moesin	1.17479	2.21288e-07	53		1.1058	0.00142676	47
4	Q13126	MTAP	X			S-methyl-5~-thioadenosine phosphorylase	0.851691	0.000641533	53		1.0294	0.528998	47
2	P42345	MTOR				Serine/threonine-protein kinase mTOR	0.946869	0.020614	53		1.00206	0.933993	47
3,4	Q14764	MVP	X			Major vault protein	1.05744	0.116308	53		0.818585	4.64919e-05	47
1,2	P20591	MX1				Interferon-induced GTP-binding protein Mx1	0.943458	0.355771	41		0.799641	0.00340712	32
2	P35580	MYH10				Myosin-10	0.990404	0.803349	53		0.982429	0.691558	47
2	P35749	MYH11				Myosin-11	0.210182	2.04875e-36	53		0.177965	1.3796e-32	47
2	Q7Z406	MYH14				Myosin-14	0.971528	0.355491	53		1.0271	0.393672	47
2,3,4	P35579	MYH9				Myosin-9	1.14805	5.42938e-06	53		1.06828	0.0542662	47
2	O14950	MYL12B				Myosin regulatory light chain 12B	1.03553	0.345412	53		0.998122	0.964754	47
2	P60660	MYL6				Myosin light polypeptide 6	1.30483	6.72228e-12	53		1.22632	7.08421e-09	47
2	P14649	MYL6B				Myosin light chain 6B	0.951331	0.000870517	3		0.963792	0.108938	3
2	P24844	MYL9				Myosin regulatory light polypeptide 9	0.4795	8.87873e-32	17		0.470398	3.01823e-17	20
2	Q15746	MYLK				Myosin light chain kinase, smooth muscle	0.271574	5.87001e-45	13		0.299526	8.10633e-37	7
2	Q12965	MYO1E				Unconventional myosin-Ie	1.18317	6.58059e-06	47		1.23486	4.3792e-08	40
2	Q9Y4I1	MYO5A				Unconventional myosin-Va	1.19659	1.10881e-05	53		1.19349	9.11099e-06	47
2	Q9UM54	MYO6				Unconventional myosin-VI	0.473942	1.65562e-25	48		0.48687	1.71254e-19	46
2	P54920	NAPA				Alpha-soluble NSF attachment protein	1.15413	2.87311e-08	53		1.05374	0.0282645	47
2	Q99747	NAPG				Gamma-soluble NSF attachment protein	0.824062	1.01364e-08	39		0.753491	2.66188e-10	35
1	P13591	NCAM1				Neural cell adhesion molecule 1	0.334473	7.23589e-34	23		0.366692	1.22683e-21	15
1,2	Q15080	NCF4				Neutrophil cytosol factor 4	0.931909	2.96893e-11	3		0.942902	2.14784e-07	4
2,3,4	Q92542	NCSTN	X			Nicastrin	1.25939	8.06946e-08	53		0.99733	0.950734	47
4	Q96PU5	NEDD4L	X			E3 ubiquitin-protein ligase NEDD4-like	1.07589	0.0496346	53		0.892935	0.00544655	47
1	P07196	NEFL				Neurofilament light polypeptide	0.854022	0.00257693	3		0.865595	0.0632352	4
1,2	P19838	NFKB1				Nuclear factor NF-kappa-B p105 subunit	0.862751	5.01543e-05	14		0.816785	2.08986e-09	14
1,2	O00221	NFKBIE				NF-kappa-B inhibitor epsilon	0.937873	8.01358e-09	3		0.927527	7.48195e-15	2
3,4	Q9NQR4	NIT2	X			Omega-amidase NIT2	1.10628	3.50217e-05	53		1.38867	2.52381e-13	47
2	P15531	NME1				Nucleoside diphosphate kinase A	0.796984	1.98401e-09	53		0.814479	2.16356e-07	47
1	Q9UMY1	NOL7				Nucleolar protein 7	0.888402	1.46765e-05	4		0.883738	0.000670852	3
2	P06748	NPM1				Nucleophosmin	1.93278	1.18209e-22	53		1.93325	4.71032e-20	47
1,2,3,4	P01111	NRAS	X			GTPase NRas	0.870033	6.1938e-07	53		0.983638	0.480386	47
2	P46459	NSF				Vesicle-fusing ATPase	0.635391	3.86338e-25	53		0.579013	1.21124e-19	47
1	P21589	NT5E		X		5~-nucleotidase	1.0244	0.750167	50		0.792601	0.00528627	43
1	P53384	NUBP1				Cytosolic Fe-S cluster assembly factor NUBP1	0.936745	3.01168e-13	3		0.938858	5.5727e-08	3
2	Q14980	NUMA1				Nuclear mitotic apparatus protein 1	1.02067	0.465811	53		1.02463	0.465017	47
1	P57740	NUP107				Nuclear pore complex protein Nup107	1.35602	9.22607e-19	53		1.39185	1.58688e-13	47
1	Q7Z3B4	NUP54				Nucleoporin p54	1.23162	4.12086e-07	46		1.38502	6.048e-12	40
4	P52948	NUP98	X			Nuclear pore complex protein Nup98-Nup96	1.01215	0.696618	50		1.14892	1.78009e-06	43
1,2	P00973	OAS1				2~-5~-oligoadenylate synthase 1	0.926749	3.81347e-05	4		0.943487	0.0212208	3
1,2	P29728	OAS2				2~-5~-oligoadenylate synthase 2	1.15973	0.00528466	27		1.05142	0.335569	19
1,2	Q9Y6K5	OAS3				2~-5~-oligoadenylate synthase 3	1.26831	6.54154e-05	41		1.1872	0.00922899	32
1	P04181	OAT				Ornithine aminotransferase, mitochondrial	0.878353	0.000651682	53		0.849133	2.28034e-07	47
2	Q01968	OCRL				Inositol polyphosphate 5-phosphatase OCRL	0.839641	9.71362e-08	31		0.836105	6.55975e-11	31
1	Q13416	ORC2				Origin recognition complex subunit 2	0.748035	5.49594e-08	10		0.735301	9.35167e-08	11
2	P02763	ORM1				Alpha-1-acid glycoprotein 1	0.234621	7.92533e-29	53		0.242153	8.20537e-28	47
2	P19652	ORM2				Alpha-1-acid glycoprotein 2	0.195741	9.86688e-37	53		0.225149	2.20446e-28	47
3	O95747	OXSR1	X			Serine/threonine-protein kinase OSR1	0.841997	9.00793e-08	53		0.993387	0.818058	47
2	Q99572	P2RX7				P2X purinoceptor 7	0.59839	1.49616e-07	53		0.687939	0.000153287	47
3,4	P07237	P4HB	X			Protein disulfide-isomerase	1.30908	6.21399e-11	53		1.15051	0.000160372	47
2	P11940	PABPC1				Polyadenylate-binding protein 1	1.58353	3.61942e-22	53		1.44849	1.39634e-16	47
2	Q13310	PABPC4				Polyadenylate-binding protein 4	1.24081	5.9185e-10	33		1.32626	4.0725e-15	28
2	Q13177	PAK2				Serine/threonine-protein kinase PAK 2	0.985474	0.628451	50		1.08986	0.00937747	43
2	P09874	PARP1				Poly [ADP-ribose] polymerase 1	1.04358	0.174675	53		1.01106	0.784765	47
2	P12004	PCNA				Proliferating cell nuclear antigen	1.43017	8.65297e-17	53		1.34369	1.23427e-10	47
1	Q9UKL6	PCTP				Phosphatidylcholine transfer protein	1.46336	2.2922e-22	23		1.3631	3.85068e-22	17
2	Q9UHG3	PCYOX1				Prenylcysteine oxidase 1	0.842519	4.55841e-06	53		0.84281	2.39783e-05	47
2,3,4	Q53EL6	PDCD4	X			Programmed cell death protein 4	1.29851	4.59136e-06	53		1.76636	4.68193e-14	47
3,4	Q8WUM4	PDCD6IP	X			Programmed cell death 6-interacting protein	0.734726	1.86643e-16	53		0.944208	0.11317	47
1,2	P09619	PDGFRB				Platelet-derived growth factor receptor beta	0.898854	3.92221e-07	4		0.923319	1.39704e-08	3
1,3,4	P11177	PDHB	X		X	Pyruvate dehydrogenase E1 component subunit beta, mitochondrial	1.0989	0.000778039	53		1.28757	4.403e-10	47
2	P30101	PDIA3				Protein disulfide-isomerase A3	1.22541	4.24089e-08	53		1.12607	0.000245669	47
2	Q6A1A2	PDPK1				Putative 3-phosphoinositide-dependent protein kinase 2	0.917888	8.43294e-11	3		0.906594	7.63914e-08	4
3,4	O00764	PDXK	X			Pyridoxal kinase	1.17493	1.68895e-05	53		0.925428	0.110141	47
2	P08237	PFKM				ATP-dependent 6-phosphofructokinase, muscle type	0.72159	6.23268e-15	53		0.72762	2.73211e-11	47
1,3,4	P00558	PGK1	X			Phosphoglycerate kinase 1	0.980246	0.574523	53		1.11524	0.000306652	47
1	Q96PD5	PGLYRP2				N-acetylmuramoyl-L-alanine amidase	0.520483	9.47568e-22	53		0.510276	1.20991e-19	47
2	Q13492	PICALM				Phosphatidylinositol-binding clathrin assembly protein	0.772387	8.15425e-12	53		0.771786	3.37384e-11	47
2	O00443	PIK3C2A				Phosphatidylinositol 4-phosphate 3-kinase C2 domain-containing subunit alpha	1.20436	1.19696e-06	27		1.09566	0.00178968	18
2	Q8NEB9	PIK3C3				Phosphatidylinositol 3-kinase catalytic subunit type 3	1.05659	0.159702	36		1.09758	0.081521	32
1,2	O00329	PIK3CD				Phosphatidylinositol 4,5-bisphosphate 3-kinase catalytic subunit delta isoform	0.936725	6.32345e-09	4		0.945323	0.000336271	3
1,2	P27986	PIK3R1				Phosphatidylinositol 3-kinase regulatory subunit alpha	0.928223	1.35863e-07	3		0.943888	1.73254e-06	4
2	Q99570	PIK3R4				Phosphoinositide 3-kinase regulatory subunit 4	0.827785	2.05622e-08	44		0.920043	0.00791733	36
1,2	Q13526	PIN1				Peptidyl-prolyl cis-trans isomerase NIMA-interacting 1	0.793557	7.08091e-08	15		0.910007	0.000165612	12
1	Q16513	PKN2				Serine/threonine-protein kinase N2	1.01397	0.730981	35		0.874807	0.000902142	32
2	Q15147	PLCB4				1-phosphatidylinositol 4,5-bisphosphate phosphodiesterase beta-4	0.866156	0.0086508	43		1.04857	0.484352	45
2	P51178	PLCD1				1-phosphatidylinositol 4,5-bisphosphate phosphodiesterase delta-1	0.91784	9.33824e-07	4		0.923856	8.82156e-09	3
2	Q9BRC7	PLCD4				1-phosphatidylinositol 4,5-bisphosphate phosphodiesterase delta-4	0.543959	2.32692e-15	6		0.547558	2.83768e-10	8
1,2	P19174	PLCG1				1-phosphatidylinositol 4,5-bisphosphate phosphodiesterase gamma-1	0.915741	6.51951e-09	4		0.913269	5.44482e-09	3
1,2	P16885	PLCG2				1-phosphatidylinositol 4,5-bisphosphate phosphodiesterase gamma-2	0.944534	0.000637137	4		0.939497	4.8403e-06	3
2,3,4	Q8IV08	PLD3	X			5~-3~ exonuclease PLD3	1.50621	4.6488e-10	53		1.17615	0.0239697	47
4	Q15149	PLEC	X			Plectin	0.973187	0.253983	53		0.832306	1.52584e-05	47
2	Q9HB19	PLEKHA2				Pleckstrin homology domain-containing family A member 2	1.3031	4.12576e-13	26		1.29311	1.57322e-09	19
1	O15162	PLSCR1				Phospholipid scramblase 1	1.12177	4.65371e-06	7		1.04406	0.145641	6
1	P29590	PML				Protein PML	1.13307	0.0114607	53		1.20781	9.31171e-05	47
1	Q8ND90	PNMA1				Paraneoplastic antigen Ma1	1.13547	0.00075972	11		1.1082	0.000578477	9
1	P24928	POLR2A				DNA-directed RNA polymerase II subunit RPB1	1.01563	0.633712	53		1.04171	0.347198	47
2	P27169	PON1				Serum paraoxonase/arylesterase 1	0.303553	1.77293e-25	53		0.295406	1.99033e-29	47
4	P16435	POR	X			NADPH--cytochrome P450 reductase	1.35634	2.41423e-12	53		1.05169	0.242867	47
1	P62937	PPIA				Peptidyl-prolyl cis-trans isomerase A	1.7623	8.53611e-31	53		1.91785	5.25303e-27	47
2,3,4	P23284	PPIB	X			Peptidyl-prolyl cis-trans isomerase B	1.24134	9.82313e-09	53		1.07738	0.048465	47
1	P35813	PPM1A			X	Protein phosphatase 1A	0.917748	4.71023e-12	4		0.914578	1.50167e-09	3
1	P49593	PPM1F				Protein phosphatase 1F	0.898746	0.00088214	53		0.87385	0.000346778	47
2	P62136	PPP1CA				Serine/threonine-protein phosphatase PP1-alpha catalytic subunit	0.930111	6.88036e-14	3		0.929968	1.89709e-12	4
1,2	P62140	PPP1CB			X	Serine/threonine-protein phosphatase PP1-beta catalytic subunit	0.927151	0.0383952	50		0.924287	0.0819698	43
2	P36873	PPP1CC				Serine/threonine-protein phosphatase PP1-gamma catalytic subunit	0.841715	1.43994e-07	21		0.809482	3.51505e-10	20
2	O14974	PPP1R12A				Protein phosphatase 1 regulatory subunit 12A	0.931117	5.71633e-13	3		0.941138	4.65738e-10	4
2	Q96C90	PPP1R14B				Protein phosphatase 1 regulatory subunit 14B	1.2015	0.000199119	47		1.29635	6.11539e-05	40
2	Q15435	PPP1R7				Protein phosphatase 1 regulatory subunit 7	0.805174	1.04713e-12	53		0.840098	3.07683e-11	47
1,2	P67775	PPP2CA		X		Serine/threonine-protein phosphatase 2A catalytic subunit alpha isoform	0.861246	4.67698e-10	13		0.89792	5.87679e-06	14
1,2	P62714	PPP2CB		X		Serine/threonine-protein phosphatase 2A catalytic subunit beta isoform	1.02462	0.194751	10		1.10144	3.10671e-07	2
1,2	P30153	PPP2R1A		X		Serine/threonine-protein phosphatase 2A 65 kDa regulatory subunit A alpha isoform	0.954517	0.0306156	53		1.05214	0.0192846	47
2	P63151	PPP2R2A	X			Serine/threonine-protein phosphatase 2A 55 kDa regulatory subunit B alpha isoform	0.966187	0.343497	53		1.13034	0.00107941	47
1,2	Q15172	PPP2R5A		X		Serine/threonine-protein phosphatase 2A 56 kDa regulatory subunit alpha isoform	1.02983	0.4262	35		1.12589	0.017177	32
1,2	Q13362	PPP2R5C		X		Serine/threonine-protein phosphatase 2A 56 kDa regulatory subunit gamma isoform	0.921147	3.51473e-09	3		0.897124	1.93817e-06	4
2	Q14738	PPP2R5D				Serine/threonine-protein phosphatase 2A 56 kDa regulatory subunit delta isoform	1.12619	0.000549635	53		1.18785	1.05692e-07	47
1,2	Q16537	PPP2R5E		X		Serine/threonine-protein phosphatase 2A 56 kDa regulatory subunit epsilon isoform	1.0342	0.567482	47		1.03721	0.480386	40
1,2	Q08209	PPP3CA				Serine/threonine-protein phosphatase 2B catalytic subunit alpha isoform	0.870269	5.205e-05	21		0.879971	0.0030319	12
1,2	P48454	PPP3CC				Serine/threonine-protein phosphatase 2B catalytic subunit gamma isoform	0.894886	2.77637e-06	6		0.880716	2.23437e-07	8
1,2	P63098	PPP3R1				Calcineurin subunit B type 1	0.899622	8.7227e-07	4		0.904021	2.7555e-05	3
1	P50897	PPT1				Palmitoyl-protein thioesterase 1	0.847263	0.00395969	33		0.760634	6.61172e-08	25
2	Q06830	PRDX1				Peroxiredoxin-1	1.16721	0.00142822	53		1.23483	1.06446e-07	47
2	P32119	PRDX2				Peroxiredoxin-2	0.501717	4.30455e-16	53		0.479331	4.30374e-18	47
3,4	Q13162	PRDX4	X			Peroxiredoxin-4	1.01986	0.571976	49		0.823976	0.000130289	44
2	P30044	PRDX5				Peroxiredoxin-5, mitochondrial	0.983906	0.663526	53		0.943112	0.117429	47
2,3,4	P30041	PRDX6	X			Peroxiredoxin-6	0.751799	6.35047e-12	53		0.908377	0.00208431	47
1	Q13131	PRKAA1				5~-AMP-activated protein kinase catalytic subunit alpha-1	1.07091	0.00754445	40		1.108	0.000108257	34
2	P17612	PRKACA				cAMP-dependent protein kinase catalytic subunit alpha	0.85113	6.41141e-06	44		0.900861	0.000868999	43
2	P22694	PRKACB				cAMP-dependent protein kinase catalytic subunit beta	0.928783	0.0149826	4		0.926603	4.27828e-15	3
2	P54619	PRKAG1				5~-AMP-activated protein kinase subunit gamma-1	0.971689	0.275016	53		1.02487	0.36214	47
2,3,4	P10644	PRKAR1A	X			cAMP-dependent protein kinase type I-alpha regulatory subunit	1.1437	0.000538524	53		1.4519	2.22166e-10	47
2,3,4	P13861	PRKAR2A	X			cAMP-dependent protein kinase type II-alpha regulatory subunit	0.646818	7.43979e-29	53		0.775484	4.18972e-13	47
2	P31323	PRKAR2B				cAMP-dependent protein kinase type II-beta regulatory subunit	0.582502	1.85929e-13	6		0.609999	8.78367e-11	8
2	P17252	PRKCA				Protein kinase C alpha type	0.559171	1.49113e-16	43		0.44808	5.11239e-17	36
1,2	Q05655	PRKCD				Protein kinase C delta type	0.910656	4.07006e-05	4		0.936134	6.66141e-09	3
1,2	P78527	PRKDC	X			DNA-dependent protein kinase catalytic subunit	1.34404	7.55239e-14	53		1.14604	1.51917e-06	47
2	O75569	PRKRA	X			Interferon-inducible double-stranded RNA-dependent protein kinase activator A	0.65448	2.26214e-18	45		0.752204	2.65218e-12	41
1	Q8NAV1	PRPF38A				Pre-mRNA-splicing factor 38A	1.15229	2.91036e-05	10		1.1036	0.00876124	10
2	P24158	PRTN3				Myeloblastin	0.816859	0.00650113	9		0.824251	0.00630818	4
2	P07602	PSAP				Prosaposin	0.782013	0.000349809	53		0.618112	4.87475e-10	47
1	P25786	PSMA1				Proteasome subunit alpha type-1	1.20508	1.44876e-09	53		1.17695	1.38011e-14	47
1	P60900	PSMA6				Proteasome subunit alpha type-6	1.17653	3.75035e-08	53		1.11844	7.86103e-07	47
3,4	P20618	PSMB1				Proteasome subunit beta type-1	0.991504	0.800017	48		0.915887	0.00372599	46
1	P40306	PSMB10				Proteasome subunit beta type-10	0.920645	0.293463	27		0.702965	2.36021e-05	26
2	P28074	PSMB5				Proteasome subunit beta type-5	0.829114	0.000395522	31		0.995289	0.935884	31
2,3,4	P28072	PSMB6	X			Proteasome subunit beta type-6	0.87765	0.0124525	53		1.0791	0.0560547	47
1	Q99436	PSMB7				Proteasome subunit beta type-7	0.83063	0.000356346	53		0.940479	0.348761	47
1,2,3,4	P28062	PSMB8	X			Proteasome subunit beta type-8	0.880217	0.0574548	53		0.659038	1.38411e-07	47
1,2	P28065	PSMB9				Proteasome subunit beta type-9	1.3058	4.50472e-05	26		0.850382	0.0225134	28
1	P62333	PSMC6	X			26S proteasome regulatory subunit 10B	0.952207	0.0321238	53		1.06065	0.0068725	47
2	P55036	PSMD4				26S proteasome non-ATPase regulatory subunit 4	1.12127	0.00777833	47		1.25965	8.8965e-08	39
1	Q15008	PSMD6				26S proteasome non-ATPase regulatory subunit 6	0.987669	0.485738	53		1.07607	0.000376274	47
1	P51665	PSMD7				26S proteasome non-ATPase regulatory subunit 7	0.893873	0.000755985	53		0.915522	0.00261911	47
2	Q06323	PSME1				Proteasome activator complex subunit 1	1.32474	4.40655e-07	53		1.1615	7.10006e-05	47
1,2,4	Q9UL46	PSME2	X			Proteasome activator complex subunit 2	1.38395	1.06542e-06	53		1.08673	0.0645959	47
2	P61289	PSME3				Proteasome activator complex subunit 3	1.11502	0.015302	53		0.968503	0.415894	47
2	Q92530	PSMF1				Proteasome inhibitor PI31 subunit	0.835083	5.92111e-07	10		0.81123	2.6542e-08	11
1	Q14914	PTGR1				Prostaglandin reductase 1	0.811117	8.6398e-06	53		0.806029	2.77025e-06	47
2	Q05397	PTK2				Focal adhesion kinase 1	1.24483	4.59659e-06	40		1.20484	8.01728e-05	34
2	Q13308	PTK7				Inactive tyrosine-protein kinase 7	0.782949	6.32787e-09	20		0.774154	2.0395e-06	20
2	Q15257	PTPA				Serine/threonine-protein phosphatase 2A activator	0.708206	4.56488e-18	53		0.775398	3.81939e-12	47
2,4	P18031	PTPN1	X			Tyrosine-protein phosphatase non-receptor type 1	1.16864	5.72248e-06	50		0.998711	0.967293	43
1,2	Q06124	PTPN11		X		Tyrosine-protein phosphatase non-receptor type 11	0.952633	0.0550415	53		0.941623	0.0118836	47
4	Q9H3S7	PTPN23	X			Tyrosine-protein phosphatase non-receptor type 23	0.916341	0.01767	50		1.07701	0.0289439	44
1,2	P29350	PTPN6		X		Tyrosine-protein phosphatase non-receptor type 6	1.00733	0.916944	44		0.713632	2.34944e-06	35
1,2	P08575	PTPRC				Receptor-type tyrosine-protein phosphatase C	1.16483	0.013307	42		0.950502	0.445967	38
1	Q12913	PTPRJ				Receptor-type tyrosine-protein phosphatase eta	1.15405	0.0148533	47		1.02909	0.582547	39
3,4	Q00577	PURA	X			Transcriptional activator protein Pur-alpha	1.00351	0.919393	53		1.20172	1.91209e-06	47
2	P49023	PXN				Paxillin	1.09905	0.00165654	17		1.14338	4.52879e-05	8
1,2	Q9ULZ3	PYCARD				Apoptosis-associated speck-like protein containing a CARD	1.26886	0.000285566	50		1.19078	0.000123122	43
1	Q96C36	PYCR2				Pyrroline-5-carboxylate reductase 2	1.1312	0.0116312	26		1.13107	0.0146562	19
2	P62491	RAB11A				Ras-related protein Rab-11A	1.2424	2.69321e-06	49		1.1219	0.0269928	47
2	P20338	RAB4A				Ras-related protein Rab-4A	0.860577	3.35344e-05	14		0.861454	1.10644e-06	13
2	P61018	RAB4B				Ras-related protein Rab-4B	0.844568	0.000315744	46		0.780168	6.1887e-08	40
2	P20339	RAB5A				Ras-related protein Rab-5A	0.70012	9.43127e-10	20		0.715313	5.23109e-10	21
2	P61020	RAB5B				Ras-related protein Rab-5B	1.16035	0.00111416	53		1.27182	1.14552e-05	47
2	P51148	RAB5C				Ras-related protein Rab-5C	1.3545	1.19733e-16	53		1.28644	9.84403e-14	47
2,3,4	P51149	RAB7A	X			Ras-related protein Rab-7a	1.12992	6.38628e-07	53		1.3769	8.76057e-15	47
1,2	P63000	RAC1				Ras-related C3 botulinum toxin substrate 1	1.03941	0.257269	53		1.09088	0.000525814	47
2,3,4	P63244	RACK1	X			Receptor of activated protein C kinase 1	1.29587	9.78847e-14	53		1.49096	1.74854e-14	47
2	P11233	RALA				Ras-related protein Ral-A	1.05662	0.0707328	32		1.09377	0.0119018	28
2	P11234	RALB				Ras-related protein Ral-B	0.95311	0.000967883	5		0.934964	1.11672e-12	1
2	P62834	RAP1A				Ras-related protein Rap-1A	0.79809	8.43668e-11	11		0.876269	4.05304e-05	8
2	P61224	RAP1B				Ras-related protein Rap-1b	0.914258	0.00943735	53		0.913004	0.0256263	47
2,3,4	P61225	RAP2B	X			Ras-related protein Rap-2b	1.46963	6.27667e-13	53		2.01032	5.19399e-19	47
2	Q13905	RAPGEF1				Rap guanine nucleotide exchange factor 1	1.07358	0.0625073	28		0.962505	0.346082	26
2	P20936	RASA1				Ras GTPase-activating protein 1	0.717715	8.24343e-10	44		0.702087	1.48499e-12	37
1,2	Q8IV61	RASGRP3				Ras guanyl-releasing protein 3	1.50644	1.81229e-19	21		1.63787	4.21747e-18	20
2	Q16576	RBBP7				Histone-binding protein RBBP7	0.863809	1.40973e-06	24		0.881235	3.3576e-06	24
2	P02753	RBP4				Retinol-binding protein 4	0.338146	3.48916e-28	49		0.343877	1.13959e-29	43
2	P35241	RDX				Radixin	0.763656	6.25782e-13	53		0.804597	1.67301e-08	47
1,2	Q04206	RELA				Transcription factor p65	1.11112	0.000391995	17		1.11765	3.78531e-06	17
1	Q96D71	REPS1				RalBP1-associated Eps domain-containing protein 1	0.8142	1.08158e-10	31		0.880513	5.20855e-05	22
1	Q15382	RHEB				GTP-binding protein Rheb	0.899473	1.78278e-05	20		0.931401	0.00223923	20
2	P61586	RHOA				Transforming protein RhoA	1.28237	2.47274e-12	46		1.37435	2.367e-13	39
2	P08134	RHOC				Rho-related GTP-binding protein RhoC	1.19018	0.000153155	38		0.963581	0.238853	27
2	P84095	RHOG				Rho-related GTP-binding protein RhoG	0.990338	0.779904	47		0.921775	0.0101245	40
2	P17081	RHOQ				Rho-related GTP-binding protein RhoQ	0.937611	2.31862e-09	4		0.939308	5.41426e-09	3
2	Q8IXI2	RHOT1				Mitochondrial Rho GTPase 1	1.03165	0.11269	39		1.04704	0.108792	34
2	Q8IXI1	RHOT2				Mitochondrial Rho GTPase 2	1.01548	0.494272	53		1.08541	0.00156662	47
1	Q6R327	RICTOR				Rapamycin-insensitive companion of mTOR	0.950611	0.00035519	3		0.954546	0.00134717	4
3,4	O00584	RNASET2	X			Ribonuclease T2	1.83035	4.53119e-11	50		1.24678	0.00677934	43
4	Q63HN8	RNF213	X			E3 ubiquitin-protein ligase RNF213	1.0524	0.13754	53		0.900876	0.002627	47
1,2	Q13464	ROCK1			X	Rho-associated protein kinase 1	1.16917	0.000319992	21		1.08503	0.0621344	20
2	O75116	ROCK2				Rho-associated protein kinase 2	0.726814	3.94592e-13	35		0.793108	1.55995e-09	33
4	P05388	RPLP0	X			60S acidic ribosomal protein P0	1.35615	5.5687e-15	53		1.6642	1.39606e-19	47
2	P62979	RPS27A				Ubiquitin-40S ribosomal protein S27a	1.0245	0.470479	53		1.0184	0.524725	47
1,3,4	P62753	RPS6				40S ribosomal protein S6	1.29753	9.93198e-11	53		1.49441	1.66294e-10	47
2	Q15418	RPS6KA1				Ribosomal protein S6 kinase alpha-1	0.944643	9.51106e-07	3		0.93155	2.40104e-13	4
2	P51812	RPS6KA3	X			Ribosomal protein S6 kinase alpha-3	1.00758	0.812754	50		1.13546	0.000364509	43
2	Q8N122	RPTOR				Regulatory-associated protein of mTOR	1.08776	0.00094862	36		1.10783	0.00175141	31
1,3,4	Q9HB90	RRAGC	X			Ras-related GTP-binding protein C	0.888405	0.0187642	53		1.12001	0.00364257	47
1,2	P10301	RRAS				Ras-related protein R-Ras	0.751492	1.03993e-09	16		0.829806	0.000713139	9
2	P62070	RRAS2				Ras-related protein R-Ras2	0.749718	2.44182e-18	14		0.827647	2.50295e-06	13
3	Q99584	S100A13	X			Protein S100-A13	1.05513	0.36811	53		0.766613	6.34555e-05	47
1,2	P05109	S100A8				Protein S100-A8	0.42108	2.25974e-11	49		0.355473	1.10719e-16	43
1,2	P04271	S100B				Protein S100-B	0.316719	1.41794e-16	51		0.395663	3.33771e-13	46
3,4	Q9Y3Z3	SAMHD1	X			Deoxynucleoside triphosphate triphosphohydrolase SAMHD1	1.35094	1.9938e-09	53		1.1274	0.0132841	47
3	Q9Y3A5	SBDS	X			Ribosome maturation protein SBDS	0.834344	5.44268e-08	53		1.08053	0.0245024	47
1	P22307	SCP2	X			Non-specific lipid-transfer protein	0.748488	1.94628e-09	47		0.633241	4.36486e-18	40
3,4	O00560	SDCBP	X			Syntenin-1	1.61731	3.19872e-11	53		1.2416	0.00011346	47
1	P31040	SDHA				Succinate dehydrogenase [ubiquinone] flavoprotein subunit, mitochondrial	1.33004	2.63855e-11	53		1.36486	1.45642e-12	47
1	Q9UBV2	SEL1L			X	Protein sel-1 homolog 1	1.1692	0.00324598	47		1.21877	0.000815698	38
3	Q8NC51	SERBP1	X			Plasminogen activator inhibitor 1 RNA-binding protein	1.18856	0.00279592	53		1.65646	2.24794e-06	47
2	P01009	SERPINA1				Alpha-1-antitrypsin	0.211109	7.94293e-32	53		0.240419	1.44033e-26	47
2,3	P50453	SERPINB9	X			Serpin B9	0.863938	0.00367712	53		1.12278	0.138083	47
1,2	P05155	SERPING1				Plasma protease C1 inhibitor	0.338974	1.52613e-27	53		0.318476	5.46072e-31	47
2	Q01105	SET				Protein SET	1.44179	2.42819e-15	53		1.5591	2.56964e-19	47
1	Q12874	SF3A3				Splicing factor 3A subunit 3	1.14268	6.09639e-05	53		1.21341	5.60037e-07	47
1	O75533	SF3B1				Splicing factor 3B subunit 1	0.990915	0.64367	53		1.00091	0.966892	47
2	Q99961	SH3GL1				Endophilin-A2	0.777044	1.43699e-07	32		0.775604	1.22085e-07	28
2	Q9Y371	SH3GLB1				Endophilin-B1	1.05672	0.0423731	43		1.08756	0.00820087	37
2	Q9NR46	SH3GLB2				Endophilin-B2	0.816333	3.52897e-06	15		0.843052	2.31901e-08	12
2	Q96B97	SH3KBP1				SH3 domain-containing kinase-binding protein 1	0.92104	1.70161e-11	4		0.911682	7.38124e-07	3
1	Q9BZZ2	SIGLEC1				Sialoadhesin	0.947987	0.00384348	3		0.941851	5.32196e-09	4
2	Q96ST3	SIN3A				Paired amphipathic helix protein Sin3a	0.917676	0.000841353	23		0.966547	0.161656	18
2	P78324	SIRPA				Tyrosine-protein phosphatase non-receptor type substrate 1	0.858548	9.67605e-10	10		0.86796	4.08405e-07	11
2	P63208	SKP1				S-phase kinase-associated protein 1	0.780742	3.17525e-06	53		0.834423	0.000375548	47
3,4	P53985	SLC16A1	X			Monocarboxylate transporter 1	0.715867	2.00401e-13	49		0.82866	1.62437e-07	43
2	P43003	SLC1A3				Excitatory amino acid transporter 1	0.194772	5.21545e-35	27		0.214245	1.50439e-24	25
2	P11166	SLC2A1				Solute carrier family 2, facilitated glucose transporter member 1	0.120422	9.31887e-36	50		0.11251	5.79913e-36	44
1	P11169	SLC2A3				Solute carrier family 2, facilitated glucose transporter member 3	0.930869	0.00482956	5		0.923235	1.28802e-09	1
1	Q01650	SLC7A5				Large neutral amino acids transporter small subunit 1	0.862521	0.000224271	53		1.00805	0.902472	47
1,2	Q13485	SMAD4			X	Mothers against decapentaplegic homolog 4	1.05312	0.127975	36		1.08195	0.00620621	31
1	P51532	SMARCA4				Transcription activator BRG1	1.06598	0.00277014	6		1.08512	4.68906e-05	8
1	Q9UQE7	SMC3				Structural maintenance of chromosomes protein 3	0.900289	4.86377e-05	53		0.954604	0.114359	47
2	P37840	SNCA				Alpha-synuclein	0.794974	1.11856e-05	37		1.14404	0.0788478	36
2	Q9Y5X1	SNX9				Sorting nexin-9	0.915788	0.0325479	41		0.870983	0.00111999	33
2,3,4	P04179	SOD2	X			Superoxide dismutase [Mn], mitochondrial	0.813088	0.00200943	53		0.642162	1.95498e-12	47
1,2	Q07889	SOS1				Son of sevenless homolog 1	0.91162	3.15038e-11	5		0.929931	3.90113e-16	1
1	P23497	SP100				Nuclear autoantigen Sp-100	1.22251	6.52441e-07	36		1.2523	1.54415e-07	32
1	O60271	SPAG9				C-Jun-amino-terminal kinase-interacting protein 4	0.96712	0.229712	53		0.929276	0.00765315	47
2	Q13501	SQSTM1				Sequestosome-1	0.870312	0.00110472	9		0.850413	0.00181773	4
2	P12931	SRC				Proto-oncogene tyrosine-protein kinase Src	0.969065	0.346467	44		0.91273	0.00299674	35
2	Q07955	SRSF1				Serine/arginine-rich splicing factor 1	0.932821	0.101929	53		0.94793	0.129312	47
1	Q8N3U4	STAG2				Cohesin subunit SA-2	1.01726	0.534226	47		1.06195	0.0208689	39
2	Q92783	STAM				Signal transducing adapter molecule 1	0.982829	0.664386	53		1.11419	0.0143948	47
1,2,4	P42224	STAT1	X		X	Signal transducer and activator of transcription 1-alpha/beta	1.22573	0.00761988	53		0.852367	0.00175312	47
1,2	P52630	STAT2				Signal transducer and activator of transcription 2	1.02835	0.491245	50		0.947276	0.0949385	43
1,2,4	P40763	STAT3	X			Signal transducer and activator of transcription 3	1.1303	0.000269717	53		0.985285	0.688903	47
1,2	P42229	STAT5A				Signal transducer and activator of transcription 5A	1.00566	0.860841	44		1.03745	0.249412	37
1,2	P42226	STAT6				Signal transducer and activator of transcription 6	1.30549	1.01731e-10	50		1.17079	0.000581741	43
1,2	Q13586	STIM1				Stromal interaction molecule 1	0.890791	0.0162672	39		0.798325	1.76846e-06	34
2,3,4	Q86WV6	STING1	X			Stimulator of interferon genes protein	1.10305	0.0124448	47		0.859585	0.000734956	38
1	Q8N1F8	STK11IP				Serine/threonine-protein kinase 11-interacting protein	0.982017	0.586418	27		1.05166	0.157749	17
2	O14662	STX16				Syntaxin-16	0.980165	0.614113	21		1.02744	0.623814	19
3,4	O15260	SURF4	X			Surfeit locus protein 4	1.12739	0.00074398	53		0.939642	0.0632081	47
1,2,4	Q03518	TAP1	X			Antigen peptide transporter 1	1.31295	0.000130833	53		0.805352	0.00122349	47
1,2	Q03519	TAP2				Antigen peptide transporter 2	0.947783	0.292745	40		0.762823	1.00916e-06	32
1,2	O15533	TAPBP				Tapasin	2.22674	2.22404e-11	41		1.18137	0.0358204	31
1,2	Q9UHD2	TBK1				Serine/threonine-protein kinase TBK1	0.838586	7.20958e-07	15		0.819573	2.94145e-08	11
2,3,4	Q13488	TCIRG1	X			V-type proton ATPase 116 kDa subunit a3	1.1232	0.0114648	53		0.901732	0.0498554	47
2	P02787	TF				Serotransferrin	0.215987	1.55305e-35	53		0.223974	6.88796e-31	47
1,2	P02786	TFRC				Transferrin receptor protein 1	0.987247	0.812461	53		0.90082	0.0305961	47
1	P07996	THBS1				Thrombospondin-1	0.908218	0.00580823	5		0.919269	5.06137e-07	1
1,2	P04216	THY1				Thy-1 membrane glycoprotein	0.656232	1.27892e-12	53		0.565044	3.26572e-17	47
2	P35625	TIMP3				Metalloproteinase inhibitor 3	0.794379	0.00487349	4		0.810089	0.0119195	3
2,4	P29401	TKT	X			Transketolase	0.909875	0.00410112	53		1.09845	0.0111222	47
1	Q86UE8	TLK2				Serine/threonine-protein kinase tousled-like 2	1.17325	3.15188e-07	14		1.21111	2.5401e-06	13
2	Q9Y490	TLN1				Talin-1	0.960355	0.0349097	53		0.946067	0.0130328	47
2	Q9Y4G6	TLN2				Talin-2	0.887171	0.0013892	53		0.976167	0.643408	47
1,2	O15455	TLR3				Toll-like receptor 3	1.15125	0.00024759	20		1.02743	0.446671	21
1,3,4	Q15363	TMED2	X		X	Transmembrane emp24 domain-containing protein 2	1.5501	1.17685e-14	53		1.24297	0.000639318	47
1,2	Q9H0E2	TOLLIP				Toll-interacting protein	1.01895	0.453226	45		1.06279	0.0674309	42
1	P29144	TPP2				Tripeptidyl-peptidase 2	0.693632	1.78244e-13	53		0.787107	6.97401e-06	47
1	Q15661	TPSAB1				Tryptase alpha/beta-1	0.180546	3.05182e-40	24		0.209059	7.82487e-31	14
2	Q15628	TRADD				Tumor necrosis factor receptor type 1-associated DEATH domain protein	1.11837	0.000565925	41		1.08077	0.0165375	32
1	Q9C040	TRIM2				Tripartite motif-containing protein 2	0.806349	6.312e-08	7		0.845635	6.10646e-05	6
2	Q14258	TRIM25				E3 ubiquitin/ISG15 ligase TRIM25	0.956005	0.0743117	53		1.00577	0.858552	47
2	Q99816	TSG101				Tumor susceptibility gene 101 protein	0.905005	0.000206276	19		0.921936	0.00468522	15
2	Q9BQE3	TUBA1C				Tubulin alpha-1C chain	0.84071	2.12285e-08	14		0.871142	5.88619e-06	13
2	P68366	TUBA4A				Tubulin alpha-4A chain	0.23618	3.01236e-29	53		0.225633	2.65553e-21	47
2	Q9NY65	TUBA8				Tubulin alpha-8 chain	1.38105	5.92342e-09	43		1.02922	0.68428	36
1,2	P07437	TUBB				Tubulin beta chain	1.28234	9.47799e-09	53		1.26116	9.2419e-08	47
2	Q13885	TUBB2A				Tubulin beta-2A chain	0.500266	7.04123e-22	27		0.517772	1.57331e-15	26
2	Q13509	TUBB3				Tubulin beta-3 chain	0.474924	7.72187e-24	47		0.423257	3.78926e-18	39
2	P04350	TUBB4A				Tubulin beta-4A chain	0.535775	8.10934e-20	53		0.624941	1.99918e-11	47
2	Q9BUF5	TUBB6				Tubulin beta-6 chain	0.520241	2.34248e-25	53		0.488532	1.13797e-17	47
2	P23258	TUBG1				Tubulin gamma-1 chain	0.834953	6.08407e-08	12		0.857632	3.96215e-09	8
2	Q9NRH3	TUBG2				Tubulin gamma-2 chain	0.722094	4.67602e-08	41		0.680738	7.97973e-08	39
2	Q12792	TWF1				Twinfilin-1	1.04173	0.104628	53		1.09947	0.000308484	47
4	P10599	TXN	X			Thioredoxin	1.64663	3.13448e-18	53		2.02175	3.8029e-18	47
3,4	Q8NBS9	TXNDC5	X			Thioredoxin domain-containing protein 5	1.32287	2.76599e-10	53		1.69753	6.89539e-12	47
2	P22314	UBA1				Ubiquitin-like modifier-activating enzyme 1	1.05182	0.062089	53		1.084	0.000933157	47
2	A0AVT1	UBA6				Ubiquitin-like modifier-activating enzyme 6	0.872994	0.000363326	53		0.880984	0.00506855	47
1	P63279	UBE2I				SUMO-conjugating enzyme UBC9	1.04094	0.255074	36		1.15778	8.87682e-05	31
2	P61088	UBE2N				Ubiquitin-conjugating enzyme E2 N	1.08608	0.00683638	53		1.16675	2.44851e-06	47
2	Q13404	UBE2V1				Ubiquitin-conjugating enzyme E2 variant 1	1.15647	1.721e-11	31		1.17494	5.02195e-10	30
2	Q9H832	UBE2Z				Ubiquitin-conjugating enzyme E2 Z	0.935343	4.16801e-10	5		0.930387	2.51036e-16	1
1	Q9Y4E8	USP15			X	Ubiquitin carboxyl-terminal hydrolase 15	0.769297	3.59445e-13	11		0.852941	5.90223e-05	8
1	Q53GS9	USP39				U4/U6.U5 tri-snRNP-associated protein 2	0.96695	0.188365	53		0.945656	0.0767757	47
2	Q93008	USP9X				Probable ubiquitin carboxyl-terminal hydrolase FAF-X	1.0352	0.128072	53		1.03764	0.0741325	47
2	P63027	VAMP2				Vesicle-associated membrane protein 2	0.664386	8.67101e-15	5		0.68909	4.27565e-10	8
2	P50552	VASP				Vasodilator-stimulated phosphoprotein	1.09188	0.000320443	8		1.06723	0.0162419	6
2	P15498	VAV1				Proto-oncogene vav	1.10964	0.00122517	8		1.10945	0.0375172	6
1,2	P52735	VAV2				Guanine nucleotide exchange factor VAV2	1.29471	1.27544e-05	33		0.90422	0.0904024	26
2	P18206	VCL				Vinculin	0.56542	6.58298e-27	53		0.627472	1.66297e-21	47
1,3,4	P21796	VDAC1	X			Voltage-dependent anion-selective channel protein 1	1.28802	1.04276e-11	53		1.0511	0.0805632	47
2	Q9H270	VPS11				Vacuolar protein sorting-associated protein 11 homolog	0.849495	0.0235234	32		0.953577	0.237584	28
2	Q9H269	VPS16				Vacuolar protein sorting-associated protein 16 homolog	0.494772	4.77523e-08	53		0.551776	3.103e-05	47
2	Q9P253	VPS18				Vacuolar protein sorting-associated protein 18 homolog	0.890556	0.000460585	53		0.97999	0.563259	47
2	Q96AX1	VPS33A				Vacuolar protein sorting-associated protein 33A	0.908324	0.0561203	53		0.945746	0.217339	47
2	Q9H267	VPS33B				Vacuolar protein sorting-associated protein 33B	0.835272	1.02811e-05	18		0.824314	3.91804e-06	15
2	A5D8V6	VPS37C				Vacuolar protein sorting-associated protein 37C	1.16335	0.00386676	47		1.20177	4.97507e-05	41
2	Q96JC1	VPS39				Vam6/Vps39-like protein	0.868857	4.50329e-06	53		0.883882	0.000275174	47
2	P49754	VPS41				Vacuolar protein sorting-associated protein 41 homolog	1.17718	3.50047e-06	21		1.12294	0.00337791	19
2	Q96AJ9	VTI1A				Vesicle transport through interaction with t-SNAREs homolog 1A	0.83801	1.63383e-06	19		0.848147	3.5932e-06	23
2	Q9UEU0	VTI1B				Vesicle transport through interaction with t-SNAREs homolog 1B	0.905596	0.000890802	33		0.802724	8.31725e-10	26
2	P04004	VTN				Vitronectin	0.309352	2.43452e-24	53		0.311035	1.12766e-28	47
2	O00401	WASL				Neural Wiskott-Aldrich syndrome protein	0.927298	1.37099e-09	4		0.928008	2.93721e-10	3
2	O14980	XPO1				Exportin-1	1.09189	0.000300332	53		1.08917	0.000496597	47
2	O15498	YKT6				Synaptobrevin homolog YKT6	1.17068	1.29598e-08	49		1.21659	4.84737e-09	45
1	P63104	YWHAZ			X	14-3-3 protein zeta/delta	1.25213	6.33608e-06	53		1.13639	0.000815698	47
*Immune proteins within the determined pUM proteome were identified by interogating the following bioinformatic resources: 1. The nCounter PanCancer Immune Profiling Panel and nCounter Immune Exhaustion Panel (NanoSpring Technologie, Inc); 2. IPA Immune canonical pathways (Qiagen); 3. the UniProt Knowledgebase, and 4. the Reactome Pathway Browser. Differentially expressed proteins, immune checkpo…
