# Supplementary material for: Proteomics of Primary Uveal Melanoma: Insights into Metastasis and Protein Biomarkers
Source: Cancers (Basel). 2021 Jul 14;13(14):3520. doi: 10.3390/cancers13143520 (PMC8307952; doi:10.3390/cancers13143520)
Supplement: Supplementary file 1 [file cancers-13-03520-s001.zip › Table S10. DE Immune Proteins.xlsx]

## Sheet: Table S10. DE Immune Proteins
Supplementary Table S10. pUM Differentially Expressed Immune Proteins* 143 Immune Proteins Sorted by Decreasing Protein Ratio
Bioinformatic Source	UniProt Accession	Gene name	Protein	Protein Ratio Met /NoMet	Adjusted p-Value	Metastasizing pUM Count	Non-Metastasizing pUM Count	% Imputation	Functional Themes
DE Immune Proteins Elevated in Metastasizing pUM (n=83)
1,2,4	P04439	HLA-A	HLA class I histocompatibility antigen, A alpha chain	1.81806	1.60705e-06	53	47	0	Antigen processing & presentation, T cell activation & proliferation, T cell mediated cytotoxicity, NK cell mediated cytotoxicity
2,3,4	P61769	B2M	Beta-2-microglobulin	1.76827	2.65926e-05	47	39	14	Antigen processing & presentation;T cell cytokine production; T cell medicated cytotoxicity
1,2,4	P01903	HLA-DRA	HLA class II histocompatibility antigen, DR alpha chain	1.72735	9.17413e-05	53	47	0	Antigen processing & presentation, Immune Checkpoint, Immune Suppresive
1,2,4	Q03518	TAP1	Antigen peptide transporter 1	1.63028	3.23926e-05	53	47	0	Antigen processing & presentation
1,2,4	P10321	HLA-C	HLA class I histocompatibility antigen, C alpha chain	1.62419	1.79022e-05	52	46	2	Antigen processing & presentation, regulation of the Immune response, cytotoxicity
3,4	P07686	HEXB	Beta-hexosaminidase subunit beta	1.58918	0.000190552	53	47	0	Neutrophil degranulation
1,3,4	P17931	LGALS3	Galectin-3	1.54879	4.56333e-05	52	47	1	Macrophage & monocyte chemotaxis, T cell activation, T cell proliferation, neutrophil chemotaxis, neutrophil degranulation, Immune suppresive
3	Q9H3G5	CPVL	Probable serine carboxypeptidase CPVL	1.48597	0.000742949	53	47	0	Antigen processing & presenttion
3,4	O00584	RNASET2	Ribonuclease T2	1.46806	0.00508992	50	43	7	Neutrophil Degranulation
3	Q8TCT9	HM13	Minor histocompatibility antigen H13	1.45958	4.85587e-06	53	47	0	Antigen Proccessing & Presentation
1,2,4	P42224	STAT1	Signal transducer and activator of transcription 1-alpha/beta	1.43803	0.00167213	53	47	0	Apoptotic process, cytokine response, regulation of immune response, Immune Suppresive
3,4	P31146	CORO1A	Coronin-1A	1.42723	0.0035484	53	47	0	Leukocyte chemotaxis, NK cell degranulation, T cell homeostasis
3,4	Q86UX7	FERMT3	Fermitin family homolog 3	1.41893	2.24807e-05	53	47	0	Leukocyte cell adhesion
3,4	P28838	LAP3	Cytosol aminopeptidase	1.4185	0.000358439	53	47	0	Proteolysis, antigen processing & presentation
1,3,4	P08236	GUSB	Beta-glucuronidase	1.4021	0.000637735	53	47	0	Neutrophil degranulation
2,3,4	P39060	COL18A1	Collagen alpha-1(XVIII) chain	1.4016	0.00015136	53	47	0	Cell adhesion, cell migration, cell proliferation
1,2,4	P05107	ITGB2	Integrin beta-2	1.39577	0.010147	43	37	20	Apoptotic process, cell adhesion, cytokine signaling, leukocyte adhesion & migration, NK cell activation, neutrophil chemotaxis, degranulation & migration
1,2,4	P13473	LAMP2	Lysosome-associated membrane glycoprotein 2	1.39084	0.00251974	53	47	0	Autophagosome maturation, autophagy, neutrophil degranulation
3	Q99584	S100A13	Protein S100-A13	1.37636	0.00315407	53	47	0	Mast cell degranulation
1,3,4	P13796	LCP1	Plastin-2	1.3714	0.0180897	53	47	0	Cytokine Signaling
3,4	Q01469	FABP5	Fatty acid-binding protein 5	1.35467	0.00370502	50	43	7	Neutrophil degranulation
3,4	P15586	GNS	N-acetylglucosamine-6-sulfatase	1.33943	0.000190552	53	47	0	Neutrophil degranulation
1,2,3,4	P28062	PSMB8	Proteasome subunit beta type-8	1.33561	0.0189256	53	47	0	Antigen processing & presentation
1,4	Q16666	IFI16	Gamma-interferon-inducible protein 16	1.33168	0.0441802	53	47	0	Autophagy, monocyte differentiation, cytokine production
3,4	P09382	LGALS1	Galectin-1	1.32233	0.00463388	53	47	0	Apoptotic process, T cell activation
3,4	O00560	SDCBP	Syntenin-1	1.30261	0.00864856	53	47	0	Neutrophil degranulation
2,3,4	P53634	CTSC	Dipeptidyl peptidase 1	1.30147	0.00629038	53	47	0	Neutrophil degranulation, apoptotic process, T cell-mediated cytotoxicity
3,4	Q08380	LGALS3BP	Galectin-3-binding protein	1.29707	0.000463157	53	47	0	Cell adhesion, immune activtion
3,4	Q9NUQ9	CYRIB	CYFIP-related Rac1 interactor B	1.29648	0.000411124	53	47	0	T cell activation, T cell-mediated cytotoxicity
3,4	Q14764	MVP	Major vault protein	1.29179	0.00033983	53	47	0	Neutrophil degranulation
4	P16435	POR	NADPH--cytochrome P450 reductase	1.28968	0.000182212	53	47	0	Neutrophil degranulation
2,3,4	Q86WV6	STING1	Stimulator of interferon genes protein	1.28324	0.000518201	47	38	15	Autophagosome assembly, neutrophil degranulation
2,3,4	P07858	CTSB	Cathepsin B	1.2818	0.0206894	53	47	0	Neutrophil degranulation, apoptotic process
2,3,4	Q8IV08	PLD3	5~-3~ exonuclease PLD3	1.28063	0.0317694	53	47	0	Inflammatory cytokine response
3,4	Q14019	COTL1	Coactosin-like protein	1.279	0.0212017	53	47	0	Neutrophil degranulation
3,4	P17900	GM2A	Ganglioside GM2 activator	1.27462	0.0156817	53	47	0	Neutrophil degranulation
1,2,4	Q9UL46	PSME2	Proteasome activator complex subunit 2	1.2735	0.0131862	53	47	0	Antigen processing & presentation, TCR signaling
2,3,4	P16615	ATP2A2	Sarcoplasmic/endoplasmic reticulum calcium ATPase 2	1.2703	6.79821e-07	53	47	0	Calcium ion transport and homeostssis, cell adhesion
3,4	O00764	PDXK	Pyridoxal kinase	1.26961	0.00105943	53	47	0	Neutrophil degranulation
2,3,4	P04179	SOD2	Superoxide dismutase [Mn], mitochondrial	1.26617	0.0268597	53	47	0	Apoptotic process, cytokine signaling
2,3,4	Q92542	NCSTN	Nicastrin	1.26276	0.000673264	53	47	0	Apoptotic process, myeloid cell homeostasis, neutrophil degranulation; T cell proliferation
1,3,4	Q15363	TMED2	Transmembrane emp24 domain-containing protein 2	1.24709	0.0171497	53	47	0	Golgi-ER transport, Immune Suppresive
2,3,4	Q13488	TCIRG1	V-type proton ATPase 116 kDa subunit a3	1.24561	0.0117712	53	47	0	Neutrophil degranulation, T cell activation
4	P11117	ACP2	Lysosomal acid phosphatase	1.24378	0.00288971	52	46	2	Neutrophil degranulation, antigen processing & presentation
3,4	Q13162	PRDX4	Peroxiredoxin-4	1.23773	0.00330339	49	44	7	Neutrophil degranulation
2,3,4	Q92896	GLG1	Golgi apparatus protein 1	1.22934	0.00463388	53	47	0	Leukocyte migration
1,3,4	P21796	VDAC1	Voltage-dependent anion-selective channel protein 1	1.22539	8.30851e-05	53	47	0	Apoptotic process, autophagy
4	A0FGR8	ESYT2	Extended synaptotagmin-2	1.21646	0.000920158	53	47	0	Neutrophil degranulation
1,3,4	P48960	ADGRE5	Adhesion G protein-coupled receptor E5	1.20925	0.00652046	53	47	0	Leukocyte migratiom, neutrophile degranulation
3,4	Q9NZ08	ERAP1	Endoplasmic reticulum aminopeptidase 1	1.20669	0.0225943	53	47	0	Antigen processing & presentation
2,3,4	P46940	IQGAP1	Ras GTPase-activating-like protein IQGAP1	1.20597	0.00495878	53	47	0	Neutrophil degranulation
4	Q96PU5	NEDD4L	E3 ubiquitin-protein ligase NEDD4-like	1.20489	0.00619405	53	47	0	Antigen processing & presentation
2,3,4	P27824	CANX	Calnexin	1.20043	0.00187838	53	47	0	Antigen processing & presentation
1,2	P01023	A2M	Alpha-2-macroglobulin	1.20038	0.0264175	53	47	0	Extracellular matrix dissembly, platlet degranulation, regulation of complement activation, lectin pathway
3,4	O15260	SURF4	Surfeit locus protein 4	1.19981	0.00241409	53	47	0	Neutrophil degranulation
3,4	Q9Y3Z3	SAMHD1	Deoxynucleoside triphosphate triphosphohydrolase SAMHD1	1.19828	0.0276817	53	47	0	Cytokine Signaling
3,4	P40616	ARL1	ADP-ribosylation factor-like protein 1	1.19556	8.38864e-05	53	47	0	Golgi-ER transport
2,3,4	P60709	ACTB	Actin, cytoplasmic 1	1.1905	0.00555939	50	44	6	Cell motility, phagocytosis, transport activity
2,3,4	P10619	CTSA	Lysosomal protective protein	1.19032	0.016685	53	47	0	Antigen presentation, autophagy, neutrophil degranulation
2,3,4	P42858	HTT	Huntingtin	1.18313	0.00190748	53	47	0	Apoptotic process
1	P22307	SCP2	Non-specific lipid-transfer protein	1.182	0.0144175	47	40	13	Phospholipid transport, regulation of steroid metabolism, phospholipid biosynthesis
1,3,4	Q13315	ATM	Serine-protein kinase ATM	1.17604	0.0321279	47	40	13	Cell cycle, apoptotic process, B cell proliferation, pre-B cell allelic exclusion, autophagy, replicative senescence
2,3,4	P50570	DNM2	Dynamin-2	1.17474	0.000312674	53	47	0	Antigen processing & presentation, apoptotic process, phagocytosis, endocytosis
1,2	P78527	PRKDC	DNA-dependent protein kinase catalytic subunit	1.17277	0.00126357	53	47	0	Innate immune response, regulation of IgG production, Ser & Thr phosphorylation
2,3,4	P48444	ARCN1	Coatomer subunit delta	1.17162	0.0004093	53	47	0	Golgi-ER transport
3,4	Q9BS26	ERP44	Endoplasmic reticulum resident protein 44	1.17161	0.00105214	53	47	0	Neutrophil degranulation
2,4	P18031	PTPN1	Tyrosine-protein phosphatase non-receptor type 1	1.17014	0.00389312	50	43	7	Cytokine signaling
3,4	O75165	DNAJC13	DnaJ homolog subfamily C member 13	1.16973	0.00873757	53	47	0	Neutrophil degranulation
4	Q15149	PLEC	Plectin	1.16927	0.00479793	53	47	0	Apoptotic process
4	Q63HN8	RNF213	E3 ubiquitin-protein ligase RNF213	1.1682	0.0108401	53	47	0	Antigen processing & presentation
1,3,4	P49748	ACADVL	Very long-chain specific acyl-CoA dehydrogenase, mitochondrial	1.15402	0.0115071	53	47	0	Unfolded protein response, metabolism
2,3,4	P23284	PPIB	Peptidyl-prolyl cis-trans isomerase B	1.15218	0.0256273	53	47	0	Neutrophil chemotaxis
1,2,3,4	P40763	STAT3	Signal transducer and activator of transcription 3	1.14718	0.0261632	53	47	0	Apoptotic process, autophagy, cytokine signaling, T-helper 17 immune response
3,4	P07237	P4HB	Protein disulfide-isomerase	1.13783	0.0427998	53	47	0	Cytokine signaling, cell adhesion
2	P61421	ATP6V0D1	V-type proton ATPase subunit d 1	1.13712	0.0376253	53	47	0	Cellular iron homeostasis, phagosome acidification, regulation of macroautophagy, vacuolar transport
2,3,4	P53618	COPB1	Coatomer subunit beta	1.12606	9.17413e-05	53	47	0	Neutrophil degranulation; Golgi-ER transport
2,3,4	P27797	CALR	Calreticulin	1.1242	0.044665	53	47	0	Antigen processing & presentation, apoptotic process, cell cycle, phagocytosis
2	P14625	HSP90B1	Endoplasmin	1.12398	0.00722683	53	47	0	Protein metabolism, unfolded protein response, cytokine-mediated signaling, toll-like receptor signaling
3,4	P53396	ACLY	ATP-citrate synthase	1.123	0.0104942	53	47	0	Neutrophil degranulation
2,3,4	P11021	HSPA5	Endoplasmic reticulum chaperone BiP	1.12235	0.00617583	53	47	0	Antigen processing & presentation, apoptotic process, cell migration, cytokine signaling
2	P48729	CSNK1A1	Casein kinase I isoform alpha	1.12139	0.0114589	53	47	0	Protein phosphorylation, signal transduction, cell-cycle
3,4	O75131	CPNE3	Copine-3	1.1199	0.0174451	53	47	0	Neutrophil degranulation, cell migration
2	P53621	COPA	Coatomer subunit alpha	1.11598	0.00167982	53	47	0	Vesicle-mediated ER/Golgi transport, intracellular protein transport
DE Immune Proteins Decreased in Metastasizing pUM (n=60)
1	P62333	PSMC6	26S proteasome regulatory subunit 10B	0.897762	0.00552529	53	47	0	Protein homeostasis, antigen processing, interleukin-1 mediated signaling, apoptosis, DNA damage repair
2	Q9BPX5	ARPC5L	Actin-related protein 2/3 complex subunit 5-like protein	0.895023	0.0284805	53	47	0	Actin filament binding, cell migration
2	P51812	RPS6KA3	Ribosomal protein S6 kinase alpha-3	0.887375	0.0486747	50	43	7	Ser Phosphorylation, signal transduction, cell cycle, cell differentiation and growth, toll-like receptor signaling
2	P38606	ATP6V1A	V-type proton ATPase catalytic subunit A	0.884901	0.0114589	53	47	0	Cellular iron homeostasis, insulin recptor signaling, phagosome acidification, regulation of macroautophagy
1,2,3,4	P01111	NRAS	GTPase NRas	0.884505	0.00399789	53	47	0	Neutrophil degranulation
4	P52948	NUP98	Nuclear pore complex protein Nup98-Nup96	0.880958	0.0141027	50	43	7	Cytokine Signaling
1,3,4	P00558	PGK1	Phosphoglycerate kinase 1	0.878952	0.0308721	53	47	0	Metabolism
2,3,4	P08754	GNAI3	Guanine nucleotide-binding protein subunit alpha-I3	0.874644	0.0044943	40	42	18	Apoptotic process, autophagy, cell cycle, homeostasis
1,2	P00751	CFB	Complement factor B	0.873854	0.0263612	53	47	0	Complement binding, activation of complement alternate pathway
4	P04424	ASL	Argininosuccinate lyase	0.873451	0.00513373	43	37	20	Cytokine signaling
2	O75569	PRKRA	Interferon-inducible double-stranded RNA-dependent protein kinase activator A	0.870084	0.0156053	45	41	14	Ser Phosphorylation, regulation of apoptosis, regulation of cell proliferation, miRNA metabolism
2,3,4	P63244	RACK1	Receptor of activated protein C kinase 1	0.869152	0.0133927	53	47	0	Apoptoctic process
3,4	P53985	SLC16A1	Monocarboxylate transporter 1	0.863885	0.0148389	49	43	8	Homeostasis, leukocyte migration, metabolism
3,4	P51114	FXR1	Fragile X mental retardation syndrome-related protein 1	0.85556	0.0144175	45	42	13	Apoptotic process
2	P63151	PPP2R2A	Serine/threonine-protein phosphatase 2A 55 kDa regulatory subunit B alpha isoform	0.854773	0.0160044	53	47	0	Ser Dephosphorylation, cell cycle, mRNA metabolism
1,3,4	P11177	PDHB	Pyruvate dehydrogenase E1 component subunit beta, mitochondrial	0.853471	0.00263479	53	47	0	Metabolism, Immune Suppressive
3,4	P35613	BSG	Basigin	0.851856	0.0301252	53	47	0	Homeostasis, leukocyte migration, neutrophil chemotaxis; metabolism
4	Q9H3S7	PTPN23	Tyrosine-protein phosphatase non-receptor type 23	0.850819	0.0106071	50	44	6	CytokinesSignaling
3	O95747	OXSR1	Serine/threonine-protein kinase OSR1	0.847602	0.000838437	53	47	0	Chemokine signaling, T cell chemotaxis
2,3,4	Q14344	GNA13	Guanine nucleotide-binding protein subunit alpha-13	0.844176	0.000657255	53	47	0	Apoptotic process, homeostasis
3,4	Q9H9P8	L2HGDH	L-2-hydroxyglutarate dehydrogenase, mitochondrial	0.84097	0.00311135	44	36	20	Cytokine signaling, metabolism, homeostasis,
1,2	P01024	C3	Complement C3	0.840097	0.0108401	53	47	0	Activation of the compliment classical and alternate pathways, regulation of the immune response
3,4	Q00577	PURA	Transcriptional activator protein Pur-alpha	0.835067	0.00310672	53	47	0	Lymphocyte proliferation, metabolism
2,3,4	P13861	PRKAR2A	cAMP-dependent protein kinase type II-alpha regulatory subunit	0.834082	5.92913e-06	53	47	0	Homeostasis, metabolism
2,3,4	P29401	TKT	Transketolase	0.828323	0.00176705	53	47	0	Metabolism, neutrophil degranulation
2,3,4	P30041	PRDX6	Peroxiredoxin-6	0.827629	0.000763016	53	47	0	Neutrophil degranulation, stress response
3,4	Q13126	MTAP	S-methyl-5~-thioadenosine phosphorylase	0.827365	0.021281	53	47	0	Cytokine signaling, metabolism
2,3,4	P51149	RAB7A	Ras-related protein Rab-7a	0.820627	1.18152e-05	53	47	0	Antigen processing & presentation, neutrophil degranulation, phagosome maturation
3,4	Q9NQT8	KIF13B	Kinesin-like protein KIF13B	0.819961	0.000303016	44	37	19	Homeostasis, T cell Activation
3,4	P35573	AGL	Glycogen debranching enzyme	0.815785	0.0110215	53	47	0	Neutrophil degranulation
3,4	P05388	RPLP0	60S acidic ribosomal protein P0	0.814897	0.000205915	53	47	0	Cytokine signaling, metabolism, cellular response to stress
4	P10599	TXN	Thioredoxin	0.81446	0.0107946	53	47	0	Neutrophil degranulation, cytokine signaling, metabolism, cellular response to stress
2,3,4	P63092	GNAS	Guanine nucleotide-binding protein G(s) subunit alpha isoforms short	0.813729	8.38864e-05	53	47	0	Homeostasis, metabolism, signal transduction,
2,3,4	P28072	PSMB6	Proteasome subunit beta type-6	0.813319	0.0142255	53	47	0	Antigen processing & presentation, T cell receptor signaling
2,4	P99999	CYCS	Cytochrome c	0.804386	0.0462811	53	47	0	Apoptotic process
1	P00505	GOT2	Aspartate aminotransferase, mitochondrial	0.7985	0.0042153	53	47	0	Aspartate and glutamate metabolism, fatty acid transport, gluconeogenesis
3,4	Q9NQR4	NIT2	Omega-amidase NIT2	0.796645	4.83317e-06	53	47	0	Neutrophil degranulation
1,2,4	P60033	CD81	CD81 antigen	0.795357	0.011367	53	47	0	T cell activation, synapse formation, macrophage fusion, macrophage migration, adaptive immune memory, B cell proliferation, complement activation
1,3,4	Q9HB90	RRAGC	Ras-related GTP-binding protein C	0.793213	0.00379668	53	47	0	Apoptotic process, autophagy, stress response
2,3,4	P0DMV8	HSPA1A	Heat shock 70 kDa protein 1A	0.791299	0.0022224	53	47	0	Neutrophil degranulation, cellular response to stress
3,4	Q04760	GLO1	Lactoylglutathione lyase	0.79045	0.00320996	53	47	0	Aapoptotic process
2,4	P29992	GNA11	Guanine nucleotide-binding protein subunit alpha-11	0.788395	2.43464e-05	53	47	0	Signaling pathway mediator
2,3,4	P10644	PRKAR1A	cAMP-dependent protein kinase type I-alpha regulatory subunit	0.787724	0.00130057	53	47	0	Homeostasis, metabolism, T cell proliferation
3,4	P46976	GYG1	Glycogenin-1	0.782054	7.58499e-05	53	47	0	Neutrophil degranulation
3,4	Q8NBS9	TXNDC5	Thioredoxin domain-containing protein 5	0.779291	0.0035484	53	47	0	Neutrophil degranulation, apoptotic process
3,4	P13798	APEH	Acylamino-acid-releasing enzyme	0.778748	3.10693e-06	53	47	0	Neutrophil degranulation
3,4	Q8WUM4	PDCD6IP	Programmed cell death 6-interacting protein	0.77814	5.92913e-06	53	47	0	Apoptotic process
3	Q9Y3A5	SBDS	Ribosome maturation protein SBDS	0.77216	4.77092e-06	53	47	0	Leukocyte chemotaxis
2,3	P50453	SERPINB9	Serpin B9	0.769467	0.0234701	53	47	0	Mast cell mediated Immunity, apoptotic process, NK cell cytotoxicity
1	P30837	ALDH1B1	Aldehyde dehydrogenase X, mitochondrial	0.757996	0.0302583	53	47	0	Carbohydrate metabolism, detoxification of alcohol-derived acetaldehyde
3,4	P09960	LTA4H	Leukotriene A-4 hydrolase	0.752053	1.79022e-05	53	47	0	Neutrophil degranulation
2,3,4	Q6NZI2	CAVIN1	Caveolae-associated protein 1	0.740208	0.00384417	53	47	0	Transcription regulation
2,3,4	Q53EL6	PDCD4	Programmed cell death protein 4	0.735134	0.00111798	53	47	0	Apoptotic process
2,3,4	P61225	RAP2B	Ras-related protein Rap-2b	0.731044	8.10219e-05	53	47	0	Neutrophil degranulation
2,3,4	P04792	HSPB1	Heat shock protein beta-1	0.726012	1.38256e-05	53	47	0	Apoptotic process, autophag, chaperone activity
1,2,4	Q9UBI6	GNG12	Guanine nucleotide-binding protein G(I)/G(S)/G(O) subunit gamma-12	0.721848	0.00163226	45	40	15	Signaling pathway mediator
3	Q8NC51	SERBP1	Plasminogen activator inhibitor 1 RNA-binding protein	0.717531	0.0160044	53	47	0	Apoptotic process
3,4	Q14240	EIF4A2	Eukaryotic initiation factor 4A-II	0.69739	2.26005e-07	53	47	0	Cytokine signaling, metabolism, protein synthesis
3,4	Q02252	ALDH6A1	Methylmalonate-semialdehyde dehydrogenase [acylating], mitochondrial	0.681163	1.28375e-06	53	47	0	Neutrophil degranulation, metabolism
3,4	P09211	GSTP1	Glutathione S-transferase P	0.67261	0.00550261	53	47	0	Apoptotic process; leukocyte proliferation, neutrophil degranulation
*Immune proteins within the determined pUM proteome were identified and functionally catogorized by interogating the indicated bioinformatic resources: 1. the nCounter PanCancer Immune Profiling Panel and nCounter Immune Exhaustion Panel (NanoSpring Technologie, Inc); 2. IPA Immune canonical pathways (Qiagen); 3. the UniProt Knowledgebase, and 4. the Reactome Pathway Browser. Differentially expre…
