# Supplementary material for: Proteomics of Primary Uveal Melanoma: Insights into Metastasis and Protein Biomarkers
Source: Cancers (Basel). 2021 Jul 14;13(14):3520. doi: 10.3390/cancers13143520 (PMC8307952; doi:10.3390/cancers13143520)
Supplement: Supplementary file 1 [file cancers-13-03520-s001.zip › Table S11. Pathways - DE Immune Proteins Elevated in Metastasizing pUM.xlsx]

## Sheet: Table S11. 83 DE Immune Up Mets
	Supplementary Table S11. Over-Represented Pathways Associated with 83 DE Immune Proteins Elevated in Metastasizing pUM*
	Pathway			Entities
				Found	Total	Ratio	p-Value	FDR
	Immune System			106	2681	0.184616	1.11022e-16	5.21805e-15
		Adaptive Immune System		54	1004	0.0691365	1.11022e-16	5.21805e-15
			Class I MHC mediated antigen processing & presentation	46	473	0.0325713	1.11022e-16	5.21805e-15
			Antigen Presentation: Folding, assembly and peptide loading of class I MHC	41	102	0.00702383	1.11022e-16	5.21805e-15
			ER-Phagosome pathway	40	173	0.011913	1.11022e-16	5.21805e-15
			Antigen processing-Cross presentation	40	195	0.0134279	1.11022e-16	5.21805e-15
			Immunoregulatory interactions between a Lymphoid and a non-Lymphoid cell	37	316	0.0217601	1.11022e-16	5.21805e-15
			Endosomal/Vacuolar pathway	36	82	0.00564661	1.11022e-16	5.21805e-15
			MHC class II antigen presentation	8	148	0.0101914	0.000186059	0.00502359
			Downstream TCR signaling	4	124	0.00853877	0.042159	ns
			STING mediated induction of host immune responses	3	24	0.00165266	0.00215554	0.0431108
		Innate Immune System		45	1333	0.0917918	8.28781e-13	3.56376e-11
			Neutrophil degranulation	33	480	0.0330533	1.11022e-16	5.21805e-15
			Cytosolic sensors of pathogen-associated DNA	4	77	0.0053023	0.00908345	ns
			IRF3-mediated induction of type I IFN	3	19	0.00130836	0.00111103	0.0244426
			DAP12 interactions	3	53	0.00364964	0.0186474	ns
			Trafficking and processing of endosomal TLR	2	16	0.00110178	0.0124865	ns
		Cytokine Signaling in Immune system		63	1092	0.0751963	1.11022e-16	5.21805e-15
			Interferon Signaling	50	394	0.0271312	1.11022e-16	5.21805e-15
			Interferon gamma signaling	44	250	0.0172153	1.11022e-16	5.21805e-15
			Interferon alpha/beta signaling	44	188	0.0129459	1.11022e-16	5.21805e-15
			Signaling by Interleukins	16	643	0.0442776	0.00123259	0.0258844
			Interleukin-12 family signaling	10	96	0.00661066	9.10804e-08	3.27889e-06
			Interleukin-12 signaling	7	84	0.00578433	3.37116e-05	0.00107877
			Gene and protein expression by JAK-STAT signaling after Interleukin-12 stimulation	6	73	0.00502686	0.000133719	0.00387785
			Interleukin-4 and Interleukin-13 signaling	6	211	0.0145297	0.02434	ns
			Interleukin-27 signaling	3	13	0.000895193	0.00037256	0.00968655
			Interleukin-35 Signalling	3	16	0.00110178	0.00067884	0.0162922
			Interleukin-6 signaling	3	17	0.00117064	0.00080805	0.0185851
			Growth hormone receptor signaling	3	29	0.00199697	0.00366113	ns
			Regulation of IFNA signaling	3	28	0.00192811	0.00332041	ns
			Interleukin-6 family signaling	3	30	0.00206583	0.00402244	ns
			Regulation of IFNG signaling	2	16	0.00110178	0.0124865	ns
			Interleukin-20 family signaling	2	29	0.00199697	0.0375699	ns
			Inactivation of CSF3 (G-CSF) signaling	2	27	0.00185925	0.0330076	ns
			Interleukin-23 signaling	2	11	0.000757471	0.00610624	ns
			Interleukin-9 signaling	2	11	0.000757471	0.00610624	ns
			Interleukin-21 signaling	2	12	0.000826332	0.00721753	ns
	Metabolism of proteins			32	2334	0.160722	ns	ns
		Unfolded Protein Response (UPR)		12	155	0.0106735	1.1183e-07	3.80221e-06
		Asparagine N-linked glycosylation		9	421	0.0289905	0.0338335	ns
		IRE1alpha activates chaperones		7	101	0.00695496	0.000105707	0.00317122
		ATF6 (ATF6-alpha) activates chaperone genes		6	15	0.00103292	1.65442e-08	6.61769e-07
		XBP1(S) activates chaperone genes		6	95	0.0065418	0.000538507	0.0134627
		Transport to the Golgi and subsequent modification		6	219	0.0150806	0.0284698	ns
		E3 ubiquitin ligases ubiquitinate target proteins		3	61	0.00420052	0.0267784	ns
	Vesicle-mediated transport			13	824	0.0567415	ns	ns
		Intra-Golgi and retrograde Golgi-to-ER traffic		7	218	0.0150117	0.00843765	ns
		Golgi-to-ER retrograde transport		6	148	0.0101914	0.00491453	ns
		ER to Golgi Anterograde Transport		6	164	0.0112932	0.00795205	ns
		COPI-dependent Golgi-to-ER retrograde traffic		5	107	0.00736813	0.00562549	ns
		COPI-mediated anterograde transport		5	107	0.00736813	0.00562549	ns
		Formation of annular gap junctions		2	11	0.000757471	0.00610624	ns
		Gap junction degradation		2	12	0.000826332	0.00721753	ns
	Hemostasis			12	801	0.0551577	ns	ns
		Platelet activation, signaling and aggregation		7	291	0.0200386	0.0343058	ns
		Platelet degranulation		6	137	0.00943396	0.00339273	ns
		Response to elevated platelet cytosolic Ca2+		6	144	0.00991599	0.00431258	ns
	Cellular responses to external stimuli			11	829	0.0570858	ns	ns
		Cellular response to chemical stress		6	208	0.0143231	0.0229012	ns
		Regulation of HMOX1 expression and activity		3	75	0.00516458	0.0448497	ns
	Signal Transduction			21	2974	0.204793	ns	ns
		RHO GTPases activate IQGAPs		3	36	0.002479	0.00664194	ns
		GLI3 is processed to GLI3R by the proteasome		3	62	0.00426938	0.0279081	ns
		Degradation of GLI2 by the proteasome		3	62	0.00426938	0.0279081	ns
		Signaling by SCF-KIT		3	51	0.00351191	0.0168661	ns
		Pre-NOTCH Processing in Golgi		2	23	0.0015838	0.024607	ns
		Insulin receptor recycling		2	28	0.00192811	0.0352599	ns
	Extracellular matrix organization			8	329	0.0226553	0.0231591	ns
		Collagen formation		5	104	0.00716155	0.00500215	ns
		Collagen biosynthesis and modifying enzymes		3	76	0.00523344	0.0463233	ns
		Assembly of collagen fibrils and other multimeric structures		3	67	0.00461369	0.0339311	ns
	Cell Cycle			4	734	0.050544	ns	ns
		Autodegradation of the E3 ubiquitin ligase COP1		3	54	0.0037185	0.0195756	ns
		p53-Dependent G1/S DNA damage checkpoint		3	70	0.00482027	0.0378425	ns
		G1/S DNA Damage Checkpoints		3	72	0.00495799	0.0405727	ns
	Gene expression (Transcription)			16	1855	0.127737	ns	ns
		Transcriptional regulation by RUNX2		5	147	0.0101226	0.0198282	ns
		RUNX2 regulates genes involved in differentiation of myeloid cells		2	6	0.000413166	0.00187992	0.0394784
		RUNX1 regulates transcription of genes involved in differentiation of myeloid cells		2	11	0.000757471	0.00610624	ns
	Metabolism			23	3634	0.250241	ns	ns
		Glycosphingolipid metabolism		4	86	0.00592205	0.013159	ns
		ChREBP activates metabolic gene expression		2	9	0.000619749	0.00414387	ns
		Hyaluronan uptake and degradation		2	18	0.0012395	0.0155901	ns
		Keratan sulfate degradation		2	22	0.00151494	0.0226664	ns
	*Reactome pathway analysis of 83 Differentially Expressed (DE) immune proteins elevated in metastaszing pUM (see Table S10) was performed with gene names and Reactome version 76. "Entities" denote all Reactome curated molecules (proteins, genes, small molecules, transcripts) used to identify the indicated pathways. Entities Ratio reflects the proportion of entities found relative to the total; p-…
