# Supplementary material for: Proteomics of Primary Uveal Melanoma: Insights into Metastasis and Protein Biomarkers
Source: Cancers (Basel). 2021 Jul 14;13(14):3520. doi: 10.3390/cancers13143520 (PMC8307952; doi:10.3390/cancers13143520)
Supplement: Supplementary file 1 [file cancers-13-03520-s001.zip › Table S12. Pathways - DE Immune Proteins Elevated in Non-Metastasizing pUM.xlsx]

## Sheet: Table S12-n60 DImmune Up NoMets
	Supplementary Table S12. Over-Represented Pathways Associated with 60 DE Immune Proteins Elevated in Non-Metastasizing pUM*
	Pathways			Entities
				Found	Total	Ratio	p-Value	FDR
	Immune System			32	2681	0.184616	3.14048e-06	0.00019471
		Innate Immune System		20	1333	0.0917918	1.84508e-05	0.000701131
			Neutrophil degranulation	13	480	0.0330533	1.65282e-06	0.00014049
			Activation of C3 and C5	2	7	0.000482027	0.000680936	0.010214
			Alternative complement activation	2	6	0.000413166	0.000502024	0.0085344
		Cytokine Signaling in Immune system		16	1092	0.0751963	0.000198427	0.00515909
			Signaling by Interleukins	11	643	0.0442776	0.000641045	0.0096523
			Interleukin-12 family signaling	6	96	0.00661066	1.42639e-05	0.000570554
			Interleukin-12 signaling	6	84	0.00578433	6.73547e-06	0.000383922
			Gene and protein expression by JAK-STAT signaling after Interleukin-12 stimulation	6	73	0.00502686	3.04005e-06	0.00019471
	Metabolism			33	3634	0.250241	0.000625743	0.0096523
		Metabolism of carbohydrates		10	456	0.0314006	0.000166606	0.00466497
		The citric acid (TCA) cycle and respiratory electron transport		6	235	0.0161823	0.00170623	0.0160727
		Glucose metabolism		6	140	0.00964055	0.000113893	0.00330289
		Regulation of insulin secretion		6	106	0.00729927	2.47771e-05	0.000891975
		Glycolysis		5	110	0.00757471	0.000332616	0.00665232
		Pyruvate metabolism and Citric Acid (TCA) cycle		5	97	0.00667952	0.000187207	0.0050546
		Glucagon-like Peptide-1 (GLP1) regulates insulin secretion		5	49	0.00337419	7.52231e-06	0.00039116
		Glucagon signaling in metabolic regulation		5	40	0.00275444	2.83138e-06	0.00019471
		Pyruvate metabolism		4	56	0.00385622	0.000251231	0.00552708
		PKA activation in glucagon signalling		4	23	0.0015838	8.17312e-06	0.000400483
		Gluconeogenesis		3	66	0.00454483	0.00554041	0.0370175
		Glycogen metabolism		3	43	0.00296102	0.00167325	0.0160727
		Regulation of Glucokinase by Glucokinase Regulatory Protein		3	40	0.00275444	0.00136251	0.0149876
		Glycogen breakdown (glycogenolysis)		3	26	0.00179039	0.000394882	0.00710788
		Glycogen synthesis		2	26	0.00179039	0.00879532	0.0483614
	Signal Transduction			22	2974	0.204793	ns	ns
		Signaling by GPCR		11	860	0.0592205	0.00616959	0.0370175
		GPCR downstream signalling		11	781	0.0537805	0.0030045	0.0219233
		G alpha (i) signalling events		8	421	0.0289905	0.00192561	0.0172137
		Signaling by Hedgehog		6	168	0.0115687	0.000302127	0.00604254
		Hedgehog 'off' state		6	124	0.00853877	5.88373e-05	0.00188279
		Opioid Signalling		5	112	0.00771244	0.00036096	0.00685823
		Extra-nuclear estrogen signaling		4	110	0.00757471	0.00300779	0.0219233
		G-protein mediated events		4	72	0.00495799	0.000643487	0.0096523
		G alpha (z) signalling events		4	62	0.00426938	0.000368417	0.00699992
		Regulation of RAS by GAPs		3	71	0.00488913	0.00676701	0.0406021
		PLC beta mediated events		3	67	0.00461369	0.00577399	0.0370175
		Glucagon-type ligand receptors		3	35	0.00241014	0.000930482	0.0130267
		PKA-mediated phosphorylation of CREB		2	26	0.00179039	0.00879532	0.0483614
		G-protein activation		2	26	0.00179039	0.00879532	0.0483614
		PKA activation		2	23	0.0015838	0.00695445	0.0417267
	Cellular Responses to External Stimuli			20	829	0.0570858	1.05948e-08	1.45148e-06
		Cellular responses to stress		20	811	0.0558463	7.33774e-09	1.37438e-06
		Cellular response to heat stress		10	135	0.00929624	3.41066e-09	1.16986e-06
		Regulation of HSF1-mediated heat shock response		10	113	0.0077813	6.3254e-10	4.33923e-07
		HSF1-dependent transactivation		7	59	0.0040628	3.75064e-08	4.27573e-06
		Attenuation phase		7	47	0.00323647	8.03731e-09	1.37438e-06
		Cellular response to chemical stress		6	208	0.0143231	0.000919198	0.0128688
		HSF1 activation		6	43	0.00296102	1.44219e-07	1.41335e-05
		Detoxification of Reactive Oxygen Species		4	65	0.00447597	0.000439698	0.00791457
	Hemostasis			12	801	0.0551577	0.00114209	0.0137051
		Signal amplification		4	40	0.00275444	6.97797e-05	0.00216317
		Thrombin signalling through proteinase activated receptors (PARs)		3	35	0.00241014	0.000930482	0.0130267
		Thromboxane signalling through TP receptor		3	29	0.00199697	0.000541656	0.00920816
		Prostacyclin signalling through prostacyclin receptor		3	23	0.0015838	0.000276536	0.00580727
		Basigin interactions		2	26	0.00179039	0.00879532	0.0483614
		ADP signalling through P2Y purinoceptor 12		2	25	0.00172153	0.00815991	0.0483614
	Metabolism of RNA			10	782	0.0538493	0.00901664	0.0483614
		AUF1 (hnRNP D0) binds and destabilizes mRNA		4	56	0.00385622	0.000251231	0.00552708
		Regulation of mRNA stability by proteins that bind AU-rich elements		4	93	0.00640408	0.00164563	0.0160727
		Transport of Mature mRNA derived from an Intron-Containing Transcript		3	81	0.00557774	0.00967227	0.0483614
		tRNA processing in the nucleus		3	70	0.00482027	0.00650988	0.0390593
		snRNP Assembly		3	66	0.00454483	0.00554041	0.0370175
		Metabolism of non-coding RNA		3	66	0.00454483	0.00554041	0.0370175
		Transport of Mature mRNAs Derived from Intronless Transcripts		3	47	0.00323647	0.00215171	0.0172137
		Transport of the SLBP Dependant Mature mRNA		3	40	0.00275444	0.00136251	0.0149876
		Transport of the SLBP independent Mature mRNA		3	39	0.00268558	0.00126771	0.0149876
	Transport of Small Molecules			10	958	0.0659689	0.0322092	ns
		Vasopressin regulates renal water homeostasis via Aquaporins		5	52	0.00358077	9.99879e-06	0.000449946
		Aquaporin-mediated transport		5	68	0.00468255	3.57668e-05	0.00121607
		Transport of Mature mRNA Derived from an Intronless Transcript		3	46	0.00316761	0.00202502	0.0172137
		Proton-coupled monocarboxylate transport		2	12	0.000826332	0.00196664	0.0172137
	Metabolism of proteins			13	2334	0.160722	ns	ns
		SUMOylation of DNA damage response and repair proteins		3	81	0.00557774	0.00967227	0.0483614
		SUMOylation of chromatin organization proteins		3	62	0.00426938	0.00466361	0.0326453
		SUMOylation of RNA binding proteins		3	51	0.00351191	0.00270733	0.0216586
		SUMOylation of DNA replication proteins		3	50	0.00344305	0.00256097	0.0204878
		SUMOylation of ubiquitinylation proteins		3	43	0.00296102	0.00167325	0.0160727
		SUMOylation of SUMOylation proteins		3	39	0.00268558	0.00126771	0.0149876
	*Reactome pathway analysis of 60 Differentially Expressed (DE) immune proteins elevatyed in non-metastasizing pUM (and decreased in metastasizing pUM, ses Table S10) was performed with gene names and Reactome version 76. "Entities" denote all Reactome curated molecules (proteins, genes, small molecules, transcripts) used to identify the indicated pathways. Entities Ratio reflects the proportion o…
