# Supplementary material for: Proteomics of Primary Uveal Melanoma: Insights into Metastasis and Protein Biomarkers
Source: Cancers (Basel). 2021 Jul 14;13(14):3520. doi: 10.3390/cancers13143520 (PMC8307952; doi:10.3390/cancers13143520)
Supplement: Supplementary file 1 [file cancers-13-03520-s001.zip › Table S13. Comparsion of DE proteins with TCGA datasets.xlsx]

## Sheet: Tale S13
Supplementary Table 13. Comparsion of DE Proteins and Proteins in the TCGA Datasets*
UniProt Accession	Gene Name	DE Protein	Protein Ratio Met /NoMet n = 100 pUM	TCGA Transcripts DA SCNA clusters3 v 4	TCGA + Laurent Transcripts DA SCNA clusters 3 v 4	TCGA Transcripts UP in mRNA cluster 3 v 4	TCGA Transcripts Down in mRNA cluster 3 v 4
Q03518	TAP1	Antigen peptide transporter 1	1.63028	X	X
O95816	BAG2	BAG family molecular chaperone regulator 2	1.59469	X	X		X
P42224	STAT1	Signal transducer and activator of transcription 1-alpha/beta	1.43803	X	X
P31146	CORO1A	Coronin-1A	1.42723	X	X
P28838	LAP3	Cytosol aminopeptidase	1.4185	X	X		X
P13796	LCP1	Plastin-2	1.3714	X	X
Q7LG56	RRM2B	Ribonucleoside-diphosphate reductase subunit M2 B	1.36357	X	X		X
Q01469	FABP5	Fatty acid-binding protein 5	1.35467	X	X
Q9NUV9	GIMAP4	GTPase IMAP family member 4	1.33117	X	X
P61019	RAB2A	Ras-related protein Rab-2A	1.31993	X	X
P27105	STOM	Erythrocyte band 7 integral membrane protein	1.22183	X	X		X
Q7Z3E5	ARMC9	LisH domain-containing protein ARMC9	1.21999	X	X
Q9Y3A6	TMED5	Transmembrane emp24 domain-containing protein 5	1.18917	X	X		X
P29218	IMPA1	Inositol monophosphatase 1	1.18702	X	X		X
Q86UE4	MTDH	Protein LYRIC	1.18278	X	X		X
Q12797	ASPH	Aspartyl/asparaginyl beta-hydroxylase	1.1789	X	X		X
P78527	PRKDC	DNA-dependent protein kinase catalytic subunit	1.17277	X	X
P26373	RPL13	60S ribosomal protein L13	0.839839	X		X
Q9NQT8	KIF13B	Kinesin-like protein KIF13B	0.819961	X	X
P34913	EPHX2	Bifunctional epoxide hydrolase 2	0.687742	X	X
P12236	SLC25A6	ADP/ATP translocase 3	1.21294			X
O14773	TPP1	Tripeptidyl-peptidase 1	1.20068			X
P55058	PLTP	Phospholipid transfer protein	1.1907			X
P55268	LAMB2	Laminin subunit beta-2	1.18206			X
Q99829	CPNE1	Copine-1	1.17399			X
P53007	SLC25A1	Tricarboxylate transport protein, mitochondrial	0.883565			X
Q02543	RPL18A	60S ribosomal protein L18a	0.868416			X
Q03154	ACY1	Aminoacylase-1	0.854657			X
P35613	BSG	Basigin	0.851856			X
Q9H3S7	PTPN23	Tyrosine-protein phosphatase non-receptor type 23	0.850819			X
P62857	RPS28	40S ribosomal protein S28	0.846357			X
P46779	RPL28	60S ribosomal protein L28	0.8356			X
P39019	RPS19	40S ribosomal protein S19	0.834068			X
Q07020	RPL18	60S ribosomal protein L18	0.813293			X
P60033	CD81	CD81 antigen	0.795357			X
P05387	RPLP2	60S acidic ribosomal protein P2	0.696787			X
O75891	ALDH1L1	Cytosolic 10-formyltetrahydrofolate dehydrogenase	0.604304			X
Q06210	GFPT1	Glutamine--fructose-6-phosphate aminotransferase [isomerizing] 1	1.50515				X
P04179	SOD2	Superoxide dismutase [Mn], mitochondrial	1.26617				X
P46940	IQGAP1	Ras GTPase-activating-like protein IQGAP1	1.20597				X
Q53H82	LACTB2	Endoribonuclease LACTB2	1.20594				X
Q13315	ATM	Serine-protein kinase ATM	1.17604				X
P80303	NUCB2	Nucleobindin-2	1.1542				X
Q96JJ7	TMX3	Protein disulfide-isomerase TMX3	1.15234				X
Q9Y3B3	TMED7	Transmembrane emp24 domain-containing protein 7	1.14784				X
O75131	CPNE3	Copine-3	1.1199				X
O60763	USO1	General vesicular transport factor p115	1.11224				X
P62333	PSMC6	26S proteasome regulatory subunit 10B	0.897762				X
P01111	NRAS	GTPase NRas	0.884505				X
Q99598	TSNAX	Translin-associated protein X	0.84746				X
Q14344	GNA13	Guanine nucleotide-binding protein subunit alpha-13	0.844176				X
Q9H9P8	L2HGDH	L-2-hydroxyglutarate dehydrogenase, mitochondrial	0.84097				X
Q14624	ITIH4	Inter-alpha-trypsin inhibitor heavy chain H4	0.836093				X
Q00059	TFAM	Transcription factor A, mitochondrial	0.830093				X
P35573	AGL	Glycogen debranching enzyme	0.815785				X
O95757	HSPA4L	Heat shock 70 kDa protein 4L	0.795951				X
Q9UEY8	ADD3	Gamma-adducin	0.761655				X
*All transcriptomic data is from Robertson et al 2017 Cancer Cell 32, 204. DE = Differentially Expressed; DA = Differentially Abundant.
Blue	DE Proteins more abundant in metastasizing than non-metastaszing pUM.
Rose	DE Proteins less abundant in metastasizing than non-metastasizing pUM
